# Supplementary material for: Deciphering molecular heterogeneity and dynamics of human hippocampal neural stem cells at different ages and injury states
Source: eLife. 2024 Apr 12;12:RP89507. doi: 10.7554/eLife.89507 (PMC11014727; doi:10.7554/eLife.89507)
Supplement: Figure 1—source data 1. [file elife-89507-fig1-data1.xlsx]

## Sheet: Patient information
Patient information
Age	Gender	Case	Post Mortem Interval (hours)	Experimental use
Neonatal 4 days	male	Neonatal distress respiratory syndrome, neonatal pneumonia, neonatal sepsis, neonatal hypoglycemia, congenital heart disease	3h	snRNA-seq and Immunohistology
31y	male	Carbon monoxide poisoning, encephalitis, liver insufficiency, renal insufficiency, scalp hematoma	4h	snRNA-seq
32y	male	Type I diabetes, hyperlactacemia, double lung pneumonia	3-4h	snRNA-seq and Immunohistology
48y	male	Multiple cerebral infarction, ischemic hypoxic encephalopathy	3-4h	snRNA-seq and Immunohistology
50y	male	Hypertension	4h	snRNA-seq and Immunohistology
56y	male	Lung cancer, respiratory and circulatory failure	3h	snRNA-seq and Immunohistology
60y	male	Small cell undifferentiated carcinoma of the right lung with brain metastasis	4h	snRNA-seq and Immunohistology
64y-1	female	Multiple organ failure	4h	snRNA-seq and Immunohistology
64y-2	male	Pulmonary malignancy accompanied by systemic multi-organ metastasis and acute exacerbation of chronic obstructive pulmonary disease	3h	snRNA-seq and Immunohistology
68y	male	Respiratory and circulatory failure, bladder cancer, intestinal obstruction, diabetes	4.5h	snRNA-seq and Immunohistology

## Sheet: Fig1B Cell type findmarker gene
The expression and distribution of findmarker genes used to identify 36 cell clusters contain 16 cell types in UMAP
p_val	avg_logFC	pct.1	pct.2	p_val_adj	cluster	gene	Celltype
0	1.66524	0.967	0.254	0	0	GRM1	Granule cells
0	1.62463	0.996	0.667	0	0	KCNIP4	Granule cells
0	1.60694	0.991	0.386	0	0	ST6GALNAC5	Granule cells
0	1.60406	0.689	0.17	0	0	ALDH1A2	Granule cells
0	1.59179	0.982	0.526	0	0	PPM1E	Granule cells
0	1.59079	0.792	0.14	0	0	TLL1	Granule cells
0	1.56697	0.921	0.123	0	0	LY86-AS1	Granule cells
0	1.53816	0.974	0.273	0	0	SLIT3	Granule cells
0	1.52451	0.999	0.742	0	0	PPFIA2	Granule cells
0	1.441	0.774	0.243	0	0	ADRA1A	Granule cells
0	1.43054	0.814	0.363	0	0	SEMA5A	Granule cells
0	1.4174	0.805	0.175	0	0	THOC3	Granule cells
0	1.41145	0.925	0.35	0	0	CLSTN2	Granule cells
0	1.40043	0.67	0.07	0	0	TARID	Granule cells
0	1.36084	0.987	0.499	0	0	RYR2	Granule cells
0	1.35848	0.964	0.475	0	0	DGKB	Granule cells
0	1.34237	0.995	0.469	0	0	KCTD16	Granule cells
0	1.33749	0.956	0.288	0	0	AC090568.2	Granule cells
0	1.33196	0.996	0.534	0	0	ERC2	Granule cells
0	1.31653	0.986	0.355	0	0	PLXNA4	Granule cells
0	1.31621	0.994	0.467	0	0	NELL2	Granule cells
0	1.30671	0.921	0.357	0	0	LINC01322	Granule cells
0	1.2786	0.984	0.517	0	0	ZFPM2	Granule cells
0	1.25534	0.928	0.317	0	0	SLC35F3	Granule cells
0	1.22864	0.964	0.407	0	0	MCTP1	Granule cells
0	1.20638	0.913	0.291	0	0	EPHA7	Granule cells
0	1.20106	0.934	0.236	0	0	CDH9	Granule cells
0	1.19185	0.992	0.512	0	0	CNKSR2	Granule cells
0	1.19149	0.884	0.189	0	0	UNC13C	Granule cells
0	1.18423	0.986	0.385	0	0	GALNT17	Granule cells
0	1.17458	0.774	0.117	0	0	SAMD3	Granule cells
0	1.17207	0.998	0.614	0	0	CSMD3	Granule cells
0	1.15763	0.946	0.204	0	0	KIAA1211L	Granule cells
0	1.15713	0.942	0.323	0	0	CDH18	Granule cells
0	1.14184	0.972	0.406	0	0	CDH8	Granule cells
0	1.12894	0.971	0.568	0	0	TIAM1	Granule cells
0	1.12632	0.99	0.397	0	0	SHISA9	Granule cells
0	1.12241	0.998	0.765	0	0	NBEA	Granule cells
0	1.11302	0.884	0.268	0	0	SYNPR	Granule cells
0	1.11006	0.988	0.387	0	0	FRMPD4	Granule cells
0	1.10953	0.801	0.234	0	0	SPHKAP	Granule cells
0	1.10792	0.997	0.385	0	0	DLGAP2	Granule cells
0	1.10218	0.986	0.453	0	0	GRM7	Granule cells
0	1.10126	0.961	0.308	0	0	KCNJ6	Granule cells
0	1.09803	0.995	0.441	0	0	GABRB3	Granule cells
0	1.09444	0.949	0.35	0	0	SYN3	Granule cells
0	1.09123	0.999	0.698	0	0	CSMD1	Granule cells
0	1.09079	0.99	0.475	0	0	TENM2	Granule cells
0	1.08785	0.905	0.211	0	0	ZMAT4	Granule cells
0	1.07828	0.91	0.282	0	0	CCDC85A	Granule cells
0	1.06464	0.989	0.444	0	0	GRIN2A	Granule cells
0	1.05256	0.994	0.383	0	0	LINGO2	Granule cells
0	1.02905	0.987	0.732	0	0	RFX3	Granule cells
0	1.02227	0.752	0.084	0	0	BDNF	Granule cells
0	1.0215	0.994	0.484	0	0	FAM19A2	Granule cells
0	1.01856	0.995	0.535	0	0	STXBP5L	Granule cells
0	1.01756	0.999	0.598	0	0	SYT1	Granule cells
0	1.01712	0.991	0.418	0	0	CACNA1E	Granule cells
0	1.01686	0.892	0.173	0	0	ANO3	Granule cells
0	1.01594	0.998	0.523	0	0	CACNA1C	Granule cells
0	1.01526	0.782	0.252	0	0	TSHZ2	Granule cells
0	1.00178	0.989	0.588	0	0	DAB1	Granule cells
0	0.996835	0.973	0.387	0	0	CHSY3	Granule cells
0	0.995098	0.95	0.482	0	0	ADAM22	Granule cells
0	0.992222	0.81	0.32	0	0	SHISA6	Granule cells
0	0.988557	0.95	0.447	0	0	DAPK1	Granule cells
0	0.986738	0.797	0.069	0	0	CNGB1	Granule cells
0	0.98606	0.764	0.243	0	0	COL25A1	Granule cells
0	0.979903	0.916	0.28	0	0	SUSD4	Granule cells
0	0.979613	0.963	0.403	0	0	EPHA6	Granule cells
0	0.977792	0.96	0.491	0	0	DIAPH2	Granule cells
0	0.973335	0.938	0.344	0	0	ADGRL2	Granule cells
0	0.967627	0.716	0.098	0	0	SLC47A1	Granule cells
0	0.96758	0.742	0.229	0	0	SPON1	Granule cells
0	0.967417	1	0.706	0	0	RBFOX1	Granule cells
0	0.964533	0.952	0.291	0	0	PCSK2	Granule cells
0	0.962174	0.983	0.554	0	0	CAMK1D	Granule cells
0	0.96034	0.96	0.365	0	0	KCNJ3	Granule cells
0	0.958428	1	0.697	0	0	DLGAP1	Granule cells
0	0.957982	0.426	0.058	0	0	AC138305.1	Granule cells
0	0.957119	0.987	0.436	0	0	LRFN5	Granule cells
0	0.957104	0.868	0.337	0	0	C8orf34	Granule cells
0	0.956369	0.999	0.64	0	0	KALRN	Granule cells
0	0.952336	0.998	0.529	0	0	GRIA1	Granule cells
0	0.951506	0.949	0.338	0	0	ARHGAP44	Granule cells
0	0.949961	0.983	0.636	0	0	LARGE1	Granule cells
0	0.949319	0.583	0.059	0	0	SCHLAP1	Granule cells
0	0.946354	1	0.704	0	0	LRRC7	Granule cells
0	0.941572	0.746	0.162	0	0	ITGA8	Granule cells
0	0.937724	0.869	0.217	0	0	KCNH1	Granule cells
0	0.931368	0.88	0.341	0	0	NRP1	Granule cells
0	0.929638	0.864	0.216	0	0	KCNK1	Granule cells
0	0.925815	0.907	0.297	0	0	GNAL	Granule cells
0	0.924885	0.961	0.307	0	0	CAMK2A	Granule cells
0	0.920075	0.637	0.118	0	0	CBLN2	Granule cells
0	0.916723	0.943	0.463	0	0	INPP4B	Granule cells
0	0.914871	0.99	0.501	0	0	SNAP25	Granule cells
0	0.909524	0.916	0.262	0	0	MICAL2	Granule cells
0	0.903282	0.921	0.339	0	0	UPP2	Granule cells
0	0.901925	0.914	0.327	0	0	PTK2B	Granule cells
0	0.899619	0.598	0.031	0	0	AC097487.1	Granule cells
0	0.896799	0.968	0.385	0	0	SEZ6L	Granule cells
0	0.896495	0.753	0.096	0	0	AL591501.1	Granule cells
0	0.891453	1	0.781	0	0	CELF2	Granule cells
0	0.878094	0.966	0.28	0	0	RBFOX3	Granule cells
0	0.87449	0.997	0.498	0	0	GRM5	Granule cells
0	0.871187	0.918	0.3	0	0	NPTXR	Granule cells
0	0.869981	0.833	0.311	0	0	STXBP6	Granule cells
0	0.866644	0.995	0.755	0	0	PPP3CA	Granule cells
0	0.863769	0.954	0.405	0	0	CAMK2B	Granule cells
0	0.859897	0.992	0.713	0	0	BTBD9	Granule cells
0	0.85904	0.783	0.1	0	0	AC106795.3	Granule cells
0	0.855814	0.743	0.126	0	0	MSC-AS1	Granule cells
0	0.85276	0.988	0.538	0	0	CACNB2	Granule cells
0	0.852702	0.916	0.301	0	0	NEK10	Granule cells
0	0.852401	0.98	0.445	0	0	CALN1	Granule cells
0	0.84558	0.998	0.479	0	0	GRIN2B	Granule cells
0	0.845144	1	0.729	0	0	FAM155A	Granule cells
0	0.843465	0.874	0.323	0	0	TTC39C	Granule cells
0	0.842924	0.935	0.343	0	0	PGBD5	Granule cells
0	0.835781	0.962	0.381	0	0	PTPRO	Granule cells
0	0.835588	0.988	0.507	0	0	PCLO	Granule cells
0	0.833308	0.969	0.322	0	0	MIR137HG	Granule cells
0	0.83229	0.933	0.285	0	0	CA10	Granule cells
0	0.831254	0.828	0.18	0	0	FAM153C	Granule cells
0	0.82395	0.962	0.364	0	0	GABRB2	Granule cells
0	0.821613	0.991	0.421	0	0	ATP8A2	Granule cells
0	0.820753	1	0.78	0	0	NRG3	Granule cells
0	0.814513	0.754	0.142	0	0	HTR4	Granule cells
0	0.814397	0.857	0.233	0	0	AC007563.2	Granule cells
0	0.81321	0.99	0.454	0	0	SLC4A10	Granule cells
0	0.811097	0.998	0.9	0	0	CADM2	Granule cells
0	0.810349	0.975	0.525	0	0	MKL2	Granule cells
0	0.803094	0.921	0.458	0	0	KLHL2	Granule cells
0	0.802914	0.998	0.776	0	0	DMD	Granule cells
0	0.801479	0.681	0.102	0	0	LYPD6B	Granule cells
0	0.797706	0.76	0.191	0	0	PCBP3	Granule cells
0	0.796994	0.975	0.495	0	0	TMEM108	Granule cells
0	0.792632	0.969	0.422	0	0	RAPGEF4	Granule cells
0	0.789043	0.973	0.426	0	0	FAM19A1	Granule cells
0	0.787092	0.973	0.353	0	0	CELF4	Granule cells
0	0.786815	0.897	0.272	0	0	BASP1-AS1	Granule cells
0	0.786159	0.793	0.215	0	0	COL19A1	Granule cells
0	0.782422	0.845	0.262	0	0	CCDC3	Granule cells
0	0.780383	0.743	0.112	0	0	C3orf67-AS1	Granule cells
0	0.7725	0.981	0.51	0	0	DGKI	Granule cells
0	0.770951	0.686	0.076	0	0	ADAMTS16	Granule cells
0	0.77072	0.889	0.255	0	0	PRICKLE1	Granule cells
0	0.763205	0.759	0.125	0	0	PRB2	Granule cells
0	0.762629	0.937	0.377	0	0	LDB2	Granule cells
0	0.762042	1	0.735	0	0	FRMD4A	Granule cells
0	0.761427	0.98	0.359	0	0	GABBR2	Granule cells
0	0.75867	0.976	0.427	0	0	GALNT18	Granule cells
0	0.75856	0.92	0.319	0	0	KCNB2	Granule cells
0	0.757748	0.819	0.159	0	0	COL26A1	Granule cells
0	0.754693	0.98	0.426	0	0	CNTN5	Granule cells
0	0.75416	0.99	0.385	0	0	CACNA1B	Granule cells
0	0.747729	0.967	0.351	0	0	KSR2	Granule cells
0	0.746838	0.926	0.466	0	0	ATP6V1H	Granule cells
0	0.743376	0.989	0.551	0	0	AGBL4	Granule cells
0	0.741735	0.9	0.678	0	0	MT-ATP6	Granule cells
0	0.741465	0.944	0.384	0	0	SCN3A	Granule cells
0	0.741181	0.861	0.421	0	0	TRPM3	Granule cells
0	0.738228	0.975	0.489	0	0	DCC	Granule cells
0	0.737849	0.901	0.359	0	0	FBXO34	Granule cells
0	0.73666	0.912	0.298	0	0	SLIT1	Granule cells
0	0.733564	0.99	0.692	0	0	SYNE1	Granule cells
0	0.731304	0.819	0.232	0	0	SLC7A14	Granule cells
0	0.727359	0.905	0.437	0	0	CEP112	Granule cells
0	0.726788	0.943	0.367	0	0	GUCY1A2	Granule cells
0	0.72368	0.803	0.178	0	0	JPH1	Granule cells
0	0.722815	0.819	0.166	0	0	ANKRD33B	Granule cells
0	0.713886	0.981	0.621	0	0	DTNB	Granule cells
0	0.713419	0.965	0.454	0	0	DYNC1I1	Granule cells
0	0.712692	0.996	0.579	0	0	CADPS	Granule cells
0	0.71025	0.333	0.15	0	0	AC011287.1	Granule cells
0	0.706549	0.999	0.635	0	0	LRRTM4	Granule cells
0	0.699796	0.888	0.261	0	0	GABRG2	Granule cells
0	0.698363	0.952	0.549	0	0	AEBP2	Granule cells
0	0.696737	0.897	0.361	0	0	EML5	Granule cells
0	0.694254	1	0.925	0	0	DLG2	Granule cells
0	0.693744	0.94	0.494	0	0	GALNT13	Granule cells
0	0.690943	0.856	0.262	0	0	ELMOD1	Granule cells
0	0.690135	0.908	0.544	0	0	SIPA1L3	Granule cells
0	0.689973	0.986	0.554	0	0	KIRREL3	Granule cells
0	0.688731	0.859	0.268	0	0	SNED1	Granule cells
0	0.687356	0.857	0.231	0	0	CACNG3	Granule cells
0	0.686405	0.971	0.373	0	0	SYN2	Granule cells
0	0.68634	0.775	0.146	0	0	AC139491.7	Granule cells
0	0.685821	0.88	0.323	0	0	CNTN3	Granule cells
0	0.685583	0.713	0.301	0	0	CDH12	Granule cells
0	0.685329	0.846	0.437	0	0	SLC24A3	Granule cells
0	0.685134	0.987	0.672	0	0	TRIM9	Granule cells
0	0.685019	0.931	0.408	0	0	HSPA12A	Granule cells
0	0.683073	0.936	0.342	0	0	SYT16	Granule cells
0	0.682304	0.894	0.37	0	0	ANKRD30BL	Granule cells
0	0.680105	0.98	0.613	0	0	EDIL3	Granule cells
0	0.679547	0.999	0.691	0	0	GRIA2	Granule cells
0	0.679061	0.936	0.327	0	0	RIMBP2	Granule cells
0	0.677851	0.991	0.745	0	0	SIPA1L1	Granule cells
0	0.677613	0.943	0.379	0	0	BRINP1	Granule cells
0	0.670125	0.838	0.248	0	0	RGS7BP	Granule cells
0	0.666272	0.783	0.196	0	0	MIR4435-2HG	Granule cells
0	0.66597	0.582	0.077	0	0	PTH2R	Granule cells
0	0.665566	0.92	0.334	0	0	SYBU	Granule cells
0	0.661548	0.962	0.444	0	0	SPTBN4	Granule cells
0	0.661182	0.921	0.395	0	0	FAM135B	Granule cells
0	0.660909	0.767	0.164	0	0	FAM153A	Granule cells
0	0.658681	0.677	0.146	0	0	AC013652.1	Granule cells
0	0.658591	0.992	0.575	0	0	RGS7	Granule cells
0	0.65826	0.956	0.463	0	0	HS6ST3	Granule cells
0	0.656185	0.888	0.353	0	0	GABRA2	Granule cells
0	0.653723	0.963	0.441	0	0	SCN8A	Granule cells
0	0.652595	0.575	0.093	0	0	SCART1	Granule cells
0	0.64969	0.993	0.527	0	0	AFF3	Granule cells
0	0.647366	0.926	0.38	0	0	NECAB1	Granule cells
0	0.64614	0.998	0.7	0	0	NEGR1	Granule cells
0	0.643703	0.994	0.446	0	0	MYT1L	Granule cells
0	0.643231	0.918	0.332	0	0	SH3GL2	Granule cells
0	0.640606	0.866	0.433	0	0	KCNT2	Granule cells
0	0.640253	0.965	0.476	0	0	SNAP91	Granule cells
0	0.639694	0.937	0.32	0	0	EPHA4	Granule cells
0	0.639295	0.904	0.341	0	0	GFOD1	Granule cells
0	0.63785	0.891	0.381	0	0	RALGPS2	Granule cells
0	0.637753	0.896	0.409	0	0	PCDH15	Granule cells
0	0.635621	0.881	0.331	0	0	MPPED2	Granule cells
0	0.632976	0.779	0.187	0	0	ERICH3	Granule cells
0	0.631745	0.915	0.538	0	0	PARD3	Granule cells
0	0.629693	0.905	0.366	0	0	ZNF804A	Granule cells
0	0.628402	0.921	0.33	0	0	PLPPR4	Granule cells
0	0.627809	0.795	0.222	0	0	CPNE4	Granule cells
0	0.627212	0.744	0.203	0	0	LINC01250	Granule cells
0	0.626955	0.894	0.29	0	0	ADCY1	Granule cells
0	0.62286	0.924	0.386	0	0	KCND3	Granule cells
0	0.621995	0.984	0.618	0	0	RASAL2	Granule cells
0	0.62161	0.775	0.172	0	0	PHYHIP	Granule cells
0	0.621607	0.899	0.472	0	0	GRAMD1B	Granule cells
0	0.621414	0.787	0.245	0	0	PLEKHA2	Granule cells
0	0.620864	0.972	0.443	0	0	SCN2A	Granule cells
0	0.619635	0.723	0.193	0	0	LINC02223	Granule cells
0	0.618327	0.905	0.287	0	0	NETO1	Granule cells
0	0.617765	0.683	0.214	0	0	GNA14	Granule cells
0	0.616724	0.994	0.486	0	0	PTPRN2	Granule cells
0	0.616134	0.885	0.394	0	0	TBC1D1	Granule cells
0	0.615683	0.983	0.481	0	0	GRIA3	Granule cells
0	0.614068	0.82	0.254	0	0	RIT2	Granule cells
0	0.613376	0.8	0.231	0	0	BCL11B	Granule cells
0	0.609206	0.79	0.186	0	0	CREG2	Granule cells
0	0.609161	0.883	0.29	0	0	KCNB1	Granule cells
0	0.607508	0.907	0.292	0	0	SRRM3	Granule cells
0	0.60707	0.722	0.153	0	0	THSD7B	Granule cells
0	0.605917	0.809	0.22	0	0	OLFM1	Granule cells
0	0.600366	0.826	0.234	0	0	KIAA1324	Granule cells
0	0.599401	0.916	0.727	0	0	MT-CO3	Granule cells
0	0.595971	0.987	0.494	0	0	ATRNL1	Granule cells
0	0.595911	0.476	0.096	0	0	LINC00276	Granule cells
0	0.595891	0.913	0.401	0	0	ADCY9	Granule cells
0	0.593551	0.962	0.538	0	0	ARFGEF3	Granule cells
0	0.593298	0.993	0.642	0	0	PLCB1	Granule cells
0	0.591798	0.892	0.297	0	0	RAP1GAP2	Granule cells
0	0.588151	0.995	0.627	0	0	CNTN1	Granule cells
0	0.586104	0.909	0.389	0	0	KCNQ5	Granule cells
0	0.585962	0.712	0.2	0	0	AC024901.1	Granule cells
0	0.585793	0.927	0.417	0	0	DGKG	Granule cells
0	0.583212	0.978	0.606	0	0	MLLT3	Granule cells
0	0.582144	0.983	0.428	0	0	CACNA2D3	Granule cells
0	0.581986	0.405	0.024	0	0	LINC02248	Granule cells
0	0.58106	0.957	0.372	0	0	CNTNAP5	Granule cells
0	0.580332	0.812	0.279	0	0	PKIG	Granule cells
0	0.57838	0.991	0.761	0	0	TTC3	Granule cells
0	0.577839	0.984	0.468	0	0	ARPP21	Granule cells
0	0.577522	0.736	0.162	0	0	RTN4RL1	Granule cells
0	0.57347	0.687	0.173	0	0	RASGRP1	Granule cells
0	0.572804	0.999	0.606	0	0	GRIK2	Granule cells
0	0.571947	0.953	0.55	0	0	NR3C2	Granule cells
0	0.570137	0.785	0.179	0	0	SLC8A2	Granule cells
0	0.569091	0.809	0.239	0	0	PPP4R4	Granule cells
0	0.568112	0.778	0.204	0	0	RAPGEFL1	Granule cells
0	0.567704	0.735	0.207	0	0	CHST9	Granule cells
0	0.567322	0.834	0.238	0	0	JAKMIP1	Granule cells
0	0.566024	0.893	0.466	0	0	SPECC1	Granule cells
0	0.56593	0.648	0.134	0	0	SLC12A8	Granule cells
0	0.564822	1	0.754	0	0	ANK3	Granule cells
0	0.564535	0.952	0.442	0	0	SORBS2	Granule cells
0	0.564434	0.999	0.81	0	0	NAV3	Granule cells
0	0.563273	0.949	0.412	0	0	CACNA1D	Granule cells
0	0.56261	0.997	0.569	0	0	CCSER1	Granule cells
0	0.561562	0.756	0.299	0	0	ACVR1	Granule cells
0	0.561128	0.754	0.208	0	0	U91319.1	Granule cells
0	0.56064	0.662	0.092	0	0	ZNF831	Granule cells
0	0.558218	0.864	0.313	0	0	CIT	Granule cells
0	0.558182	0.601	0.096	0	0	MYO5B	Granule cells
0	0.557494	0.881	0.286	0	0	KLHL29	Granule cells
0	0.557297	0.987	0.685	0	0	PRKCE	Granule cells
0	0.557046	0.398	0.131	0	0	FSTL4	Granule cells
0	0.556408	0.792	0.354	0	0	AC025159.1	Granule cells
0	0.556129	0.932	0.485	0	0	NIN	Granule cells
0	0.554992	0.808	0.233	0	0	BCL11A	Granule cells
0	0.551565	0.794	0.227	0	0	KCNAB2	Granule cells
0	0.551489	0.935	0.332	0	0	HCN1	Granule cells
0	0.551041	0.927	0.452	0	0	MCF2L2	Granule cells
0	0.550791	0.824	0.312	0	0	FP700111.1	Granule cells
0	0.547049	0.808	0.258	0	0	SSX2IP	Granule cells
0	0.547019	0.823	0.306	0	0	PTCHD1-AS	Granule cells
0	0.546253	0.87	0.386	0	0	PWAR6	Granule cells
0	0.545538	0.983	0.677	0	0	RAPGEF2	Granule cells
0	0.545045	0.877	0.362	0	0	LONRF2	Granule cells
0	0.544777	0.939	0.501	0	0	CSMD2	Granule cells
0	0.544017	0.946	0.533	0	0	KCNQ3	Granule cells
0	0.543924	0.77	0.234	0	0	PTPRR	Granule cells
0	0.542657	0.948	0.463	0	0	UNC80	Granule cells
0	0.541629	0.848	0.261	0	0	RUNDC3B	Granule cells
0	0.541489	0.998	0.629	0	0	FGF14	Granule cells
0	0.541345	0.718	0.184	0	0	NCDN	Granule cells
0	0.540483	0.717	0.195	0	0	LNX1	Granule cells
0	0.540257	0.993	0.682	0	0	CACNA2D1	Granule cells
0	0.540139	0.585	0.095	0	0	INHBA-AS1	Granule cells
0	0.539797	0.766	0.162	0	0	SYT7	Granule cells
0	0.539545	0.981	0.48	0	0	RIMS1	Granule cells
0	0.539463	0.907	0.456	0	0	ICA1L	Granule cells
0	0.538372	0.927	0.435	0	0	ADAM23	Granule cells
0	0.536833	0.899	0.358	0	0	WASF1	Granule cells
0	0.535775	0.894	0.474	0	0	PDZD2	Granule cells
0	0.530456	0.946	0.417	0	0	RALYL	Granule cells
0	0.529317	0.886	0.649	0	0	MT-CYB	Granule cells
0	0.529025	0.632	0.125	0	0	HTR1E	Granule cells
0	0.52704	0.935	0.481	0	0	AC073050.1	Granule cells
0	0.523432	0.932	0.4	0	0	DNM1	Granule cells
0	0.522596	0.913	0.574	0	0	TTTY14	Granule cells
0	0.522514	0.993	0.743	0	0	NRXN3	Granule cells
0	0.522258	0.835	0.543	0	0	MT-ND3	Granule cells
0	0.522186	0.926	0.328	0	0	GRIN1	Granule cells
0	0.521532	0.982	0.704	0	0	PDE4DIP	Granule cells
0	0.517448	0.93	0.527	0	0	STOX2	Granule cells
0	0.517011	0.969	0.657	0	0	MAP1B	Granule cells
0	0.515885	0.922	0.725	0	0	MT-CO1	Granule cells
0	0.514803	0.781	0.257	0	0	SH3BGRL2	Granule cells
0	0.513082	0.693	0.153	0	0	GSG1L	Granule cells
0	0.511639	0.777	0.201	0	0	CPLX2	Granule cells
0	0.511063	0.836	0.262	0	0	UNC13A	Granule cells
0	0.50714	0.932	0.444	0	0	STXBP1	Granule cells
0	0.506715	0.673	0.118	0	0	LAMB1	Granule cells
0	0.505043	0.837	0.272	0	0	CACNG8	Granule cells
0	0.504173	0.805	0.24	0	0	BSN	Granule cells
0	0.503626	0.994	0.875	0	0	NCAM2	Granule cells
0	0.503311	0.957	0.566	0	0	XKR6	Granule cells
0	0.501985	0.806	0.367	0	0	RECK	Granule cells
0	0.50184	0.886	0.667	0	0	MT-ND4	Granule cells
0	0.499928	0.724	0.172	0	0	CAMKK1	Granule cells
0	0.499789	0.994	0.548	0	0	SNTG1	Granule cells
0	0.498881	0.701	0.174	0	0	ADAMTS19	Granule cells
0	0.496385	0.757	0.201	0	0	PPFIA4	Granule cells
0	0.495522	0.812	0.363	0	0	CDHR3	Granule cells
0	0.495471	0.899	0.68	0	0	MT-CO2	Granule cells
0	0.493853	0.944	0.656	0	0	COP1	Granule cells
0	0.493773	0.864	0.345	0	0	ASIC2	Granule cells
0	0.493765	0.422	0.056	0	0	AC073365.1	Granule cells
0	0.493358	0.953	0.422	0	0	PAK3	Granule cells
0	0.49164	0.903	0.625	0	0	MT-ND1	Granule cells
0	0.49146	0.88	0.339	0	0	CAP2	Granule cells
0	0.490895	0.929	0.364	0	0	NMNAT2	Granule cells
0	0.48882	0.764	0.224	0	0	CEMIP2	Granule cells
0	0.48774	0.33	0.067	0	0	AC019211.1	Granule cells
0	0.487664	0.984	0.681	0	0	PHACTR1	Granule cells
0	0.487623	0.827	0.251	0	0	DNAH6	Granule cells
0	0.487248	0.778	0.252	0	0	PRR16	Granule cells
0	0.487209	0.963	0.574	0	0	PCNX2	Granule cells
0	0.487073	0.864	0.36	0	0	PPP1R13B	Granule cells
0	0.486985	0.786	0.235	0	0	BICDL1	Granule cells
0	0.486848	0.596	0.119	0	0	AC004805.1	Granule cells
0	0.486733	0.956	0.455	0	0	SLC2A13	Granule cells
0	0.484951	0.973	0.519	0	0	TMEM132B	Granule cells
0	0.482596	0.689	0.171	0	0	ARHGEF28	Granule cells
0	0.482172	0.742	0.225	0	0	COX7A2L	Granule cells
0	0.481816	0.659	0.111	0	0	SGPP2	Granule cells
0	0.481362	0.788	0.23	0	0	SVOP	Granule cells
0	0.480489	0.818	0.342	0	0	AC007388.1	Granule cells
0	0.480322	0.892	0.432	0	0	WDR17	Granule cells
0	0.479055	0.858	0.312	0	0	FRRS1L	Granule cells
0	0.478564	0.89	0.287	0	0	ENC1	Granule cells
0	0.478507	0.666	0.149	0	0	ANKRD34C-AS1	Granule cells
0	0.478081	0.99	0.566	0	0	NTRK3	Granule cells
0	0.477313	0.638	0.122	0	0	CHGB	Granule cells
0	0.476078	0.639	0.149	0	0	NWD2	Granule cells
0	0.476006	0.954	0.539	0	0	CSRNP3	Granule cells
0	0.475582	0.606	0.105	0	0	NPY1R	Granule cells
0	0.47483	0.642	0.121	0	0	ACVR1C	Granule cells
0	0.474769	0.982	0.568	0	0	AK5	Granule cells
0	0.47416	0.966	0.518	0	0	ATP2B1	Granule cells
0	0.473973	0.398	0.05	0	0	LINC01317	Granule cells
0	0.471353	0.694	0.151	0	0	GABRA5	Granule cells
0	0.469694	0.6	0.117	0	0	TCERG1L	Granule cells
0	0.469669	0.693	0.184	0	0	FAM78B	Granule cells
0	0.467887	0.936	0.455	0	0	LINC00632	Granule cells
0	0.466155	0.723	0.175	0	0	MIR222HG	Granule cells
0	0.465296	0.784	0.321	0	0	DTWD1	Granule cells
0	0.46106	0.774	0.272	0	0	TMEM241	Granule cells
0	0.460636	0.771	0.257	0	0	ADARB1	Granule cells
0	0.46025	0.649	0.14	0	0	KCNIP2	Granule cells
0	0.459153	0.545	0.136	0	0	AC008591.1	Granule cells
0	0.458122	0.832	0.363	0	0	CAMK2N1	Granule cells
0	0.456962	0.928	0.483	0	0	GRIA4	Granule cells
0	0.455728	0.873	0.309	0	0	CELF5	Granule cells
0	0.45552	0.697	0.17	0	0	SIDT1	Granule cells
0	0.454732	0.981	0.556	0	0	UNC79	Granule cells
0	0.454262	0.419	0.035	0	0	LINC01885	Granule cells
0	0.453489	0.888	0.392	0	0	EML6	Granule cells
0	0.453381	0.435	0.029	0	0	COL6A3	Granule cells
0	0.450458	0.592	0.095	0	0	FLRT3	Granule cells
0	0.450341	0.902	0.362	0	0	UNC5D	Granule cells
0	0.450276	0.775	0.274	0	0	ISPD	Granule cells
0	0.450138	0.675	0.216	0	0	PROX1	Granule cells
0	0.448301	0.795	0.349	0	0	DPF3	Granule cells
0	0.447571	0.96	0.507	0	0	RAPGEF5	Granule cells
0	0.446755	0.932	0.508	0	0	NLGN4X	Granule cells
0	0.446156	0.972	0.487	0	0	CACNA1A	Granule cells
0	0.44438	0.852	0.362	0	0	FAM49A	Granule cells
0	0.444368	0.997	0.666	0	0	MAP2	Granule cells
0	0.443636	0.974	0.574	0	0	SAMD12	Granule cells
0	0.44358	0.569	0.198	0	0	OLFM3	Granule cells
0	0.443221	0.85	0.43	0	0	CCDC92	Granule cells
0	0.44141	0.793	0.325	0	0	AC006148.1	Granule cells
0	0.440869	0.841	0.312	0	0	AMPH	Granule cells
0	0.440776	0.799	0.294	0	0	GRIK5	Granule cells
0	0.439731	0.76	0.236	0	0	NME5	Granule cells
0	0.438479	0.791	0.286	0	0	KIAA1549	Granule cells
0	0.437875	0.795	0.198	0	0	SLC17A7	Granule cells
0	0.436828	0.743	0.289	0	0	MIPEP	Granule cells
0	0.436581	0.517	0.128	0	0	AC073332.1	Granule cells
0	0.435891	0.969	0.521	0	0	CHN1	Granule cells
0	0.435056	0.987	0.694	0	0	LIMCH1	Granule cells
0	0.433889	0.523	0.071	0	0	LINC01902	Granule cells
0	0.433524	0.775	0.28	0	0	SLC41A2	Granule cells
0	0.433103	0.792	0.325	0	0	TCAF1	Granule cells
0	0.433092	0.92	0.287	0	0	KCNC2	Granule cells
0	0.433051	0.778	0.225	0	0	CHD5	Granule cells
0	0.43224	0.58	0.143	0	0	ATP8B1	Granule cells
0	0.431817	0.885	0.421	0	0	CCPG1	Granule cells
0	0.431464	0.983	0.65	0	0	R3HDM1	Granule cells
0	0.430388	0.393	0.124	0	0	MLIP	Granule cells
0	0.430146	0.888	0.425	0	0	FHOD3	Granule cells
0	0.429613	0.953	0.55	0	0	FOCAD	Granule cells
0	0.429586	0.759	0.228	0	0	IQSEC2	Granule cells
0	0.429361	0.785	0.277	0	0	SMAD3	Granule cells
0	0.428998	0.832	0.299	0	0	ADD2	Granule cells
0	0.42899	0.792	0.317	0	0	CHCHD6	Granule cells
0	0.428581	0.962	0.705	0	0	AC092691.1	Granule cells
0	0.428475	1	0.892	0	0	ADGRB3	Granule cells
0	0.428201	0.789	0.292	0	0	ICA1	Granule cells
0	0.428107	0.626	0.156	0	0	TRPC5	Granule cells
0	0.427738	0.712	0.195	0	0	ARHGAP10	Granule cells
0	0.427564	0.701	0.185	0	0	TMOD1	Granule cells
0	0.426522	0.901	0.489	0	0	HYDIN	Granule cells
0	0.426313	0.938	0.486	0	0	PAM	Granule cells
0	0.426002	0.52	0.063	0	0	TMEM200A	Granule cells
0	0.425509	0.993	0.632	0	0	PLEKHA5	Granule cells
0	0.424978	0.991	0.696	0	0	NKAIN2	Granule cells
0	0.424532	0.709	0.208	0	0	ZNF273	Granule cells
0	0.424227	0.973	0.644	0	0	NSF	Granule cells
0	0.423957	0.994	0.899	0	0	FTX	Granule cells
0	0.423284	0.971	0.668	0	0	EHBP1	Granule cells
0	0.422334	0.984	0.559	0	0	GABRB1	Granule cells
0	0.422192	0.601	0.101	0	0	C11orf87	Granule cells
0	0.421833	0.968	0.486	0	0	PDE1A	Granule cells
0	0.421797	0.971	0.672	0	0	AC124312.1	Granule cells
0	0.419946	0.816	0.492	0	0	KLF12	Granule cells
0	0.419571	0.846	0.253	0	0	SV2B	Granule cells
0	0.419243	0.855	0.329	0	0	SGSM1	Granule cells
0	0.418034	0.753	0.254	0	0	TMEM120B	Granule cells
0	0.417128	0.712	0.234	0	0	FAT4	Granule cells
0	0.416945	0.91	0.417	0	0	RASGRF2	Granule cells
0	0.416006	0.96	0.59	0	0	SOBP	Granule cells
0	0.415229	0.858	0.4	0	0	MEF2C-AS1	Granule cells
0	0.414853	0.67	0.232	0	0	LIN7A	Granule cells
0	0.414806	0.557	0.086	0	0	AL355472.3	Granule cells
0	0.413896	0.77	0.248	0	0	TMEM178A	Granule cells
0	0.413245	0.635	0.102	0	0	NPTX1	Granule cells
0	0.413015	0.968	0.684	0	0	AHI1	Granule cells
0	0.412343	0.583	0.08	0	0	FHL2	Granule cells
0	0.41146	0.825	0.369	0	0	AC092683.1	Granule cells
0	0.411336	0.804	0.314	0	0	SLC16A7	Granule cells
0	0.409894	0.649	0.19	0	0	CABP1	Granule cells
0	0.409061	0.609	0.14	0	0	VSTM2L	Granule cells
0	0.407697	0.914	0.459	0	0	GRK3	Granule cells
0	0.406894	0.962	0.439	0	0	RIMS2	Granule cells
0	0.406875	0.753	0.244	0	0	BICC1	Granule cells
0	0.406771	0.883	0.385	0	0	MEG8	Granule cells
0	0.406318	0.963	0.567	0	0	CERS6	Granule cells
0	0.405556	0.593	0.13	0	0	GALNT14	Granule cells
0	0.405214	0.554	0.06	0	0	SLC30A3	Granule cells
0	0.404713	0.643	0.243	0	0	AC079385.1	Granule cells
0	0.404174	0.993	0.679	0	0	KCNMA1	Granule cells
0	0.403719	0.672	0.231	0	0	IL1RAP	Granule cells
0	0.40286	0.582	0.101	0	0	JAG1	Granule cells
0	0.401798	0.921	0.373	0	0	DOK6	Granule cells
0	0.400205	0.878	0.367	0	0	CAMK4	Granule cells
0	0.399608	0.786	0.342	0	0	CNIH3	Granule cells
0	0.399385	0.993	0.738	0	0	TANC2	Granule cells
0	0.398388	0.776	0.266	0	0	CLVS2	Granule cells
0	0.397261	0.675	0.169	0	0	GABRA4	Granule cells
0	0.39715	0.884	0.49	0	0	TMEM117	Granule cells
0	0.396156	0.506	0.086	0	0	CDH22	Granule cells
0	0.393572	0.844	0.394	0	0	SLC4A7	Granule cells
0	0.393411	1	0.828	0	0	ANKS1B	Granule cells
0	0.393355	0.836	0.403	0	0	C16orf45	Granule cells
0	0.393233	0.559	0.142	0	0	LINC02398	Granule cells
0	0.392433	0.927	0.555	0	0	GDAP1	Granule cells
0	0.391971	0.551	0.145	0	0	NIPAL2	Granule cells
0	0.391453	0.543	0.111	0	0	TMEM35A	Granule cells
0	0.390843	0.877	0.455	0	0	MTA3	Granule cells
0	0.390092	0.987	0.484	0	0	FGF12	Granule cells
0	0.389955	0.74	0.25	0	0	ABLIM2	Granule cells
0	0.388756	0.953	0.614	0	0	DANT2	Granule cells
0	0.387628	0.866	0.371	0	0	LINC01122	Granule cells
0	0.386955	0.824	0.3	0	0	ACTN1	Granule cells
0	0.386619	0.668	0.19	0	0	MEIS3	Granule cells
0	0.38631	0.557	0.098	0	0	FAM153B	Granule cells
0	0.38558	0.796	0.427	0	0	KLHL5	Granule cells
0	0.38497	0.427	0.061	0	0	SLC38A11	Granule cells
0	0.382454	0.802	0.284	0	0	NDRG4	Granule cells
0	0.38207	0.906	0.474	0	0	NPTN	Granule cells
0	0.380698	0.846	0.398	0	0	SPATS2	Granule cells
0	0.37999	0.66	0.17	0	0	NEURL1	Granule cells
0	0.379965	0.873	0.417	0	0	VPS13A	Granule cells
0	0.379888	0.78	0.262	0	0	JPH4	Granule cells
0	0.379281	0.911	0.494	0	0	INPP4A	Granule cells
0	0.379222	0.702	0.233	0	0	FBXO16	Granule cells
0	0.378249	0.669	0.173	0	0	MMP17	Granule cells
0	0.377883	0.781	0.326	0	0	CATSPER2	Granule cells
0	0.376886	0.745	0.237	0	0	LHFPL4	Granule cells
0	0.376157	0.82	0.341	0	0	LMO7	Granule cells
0	0.37583	0.744	0.298	0	0	AC098850.3	Granule cells
0	0.375424	0.531	0.076	0	0	OPRD1	Granule cells
0	0.374958	0.652	0.179	0	0	ANXA11	Granule cells
0	0.374763	0.868	0.358	0	0	WNK2	Granule cells
0	0.374718	0.759	0.287	0	0	NCS1	Granule cells
0	0.373031	0.578	0.209	0	0	MIR2052HG	Granule cells
0	0.372461	0.614	0.11	0	0	ICAM5	Granule cells
0	0.372095	0.712	0.295	0	0	PHACTR2	Granule cells
0	0.372054	0.719	0.193	0	0	TMEM130	Granule cells
0	0.37205	0.557	0.103	0	0	SLC29A4	Granule cells
0	0.371013	0.682	0.216	0	0	FHL1	Granule cells
0	0.370273	0.613	0.131	0	0	CACNA1I	Granule cells
0	0.369326	0.653	0.228	0	0	NMNAT3	Granule cells
0	0.369031	0.64	0.162	0	0	CDON	Granule cells
0	0.368565	0.698	0.156	0	0	NRGN	Granule cells
0	0.367765	0.939	0.385	0	0	SHANK2	Granule cells
0	0.367367	0.931	0.544	0	0	APBA1	Granule cells
0	0.366638	0.646	0.175	0	0	GALNT16	Granule cells
0	0.366181	0.665	0.2	0	0	SEMA5B	Granule cells
0	0.365601	0.886	0.466	0	0	CYFIP2	Granule cells
0	0.363833	0.99	0.772	0	0	MYCBP2	Granule cells
0	0.363336	0.823	0.348	0	0	CRTC1	Granule cells
0	0.362742	0.963	0.568	0	0	TMEFF2	Granule cells
0	0.362706	1	0.805	0	0	NLGN1	Granule cells
0	0.362221	0.966	0.63	0	0	ARHGAP32	Granule cells
0	0.360943	0.873	0.445	0	0	TMEM232	Granule cells
0	0.359371	0.298	0.029	0	0	AC020637.1	Granule cells
0	0.358237	0.998	0.804	0	0	DOCK3	Granule cells
0	0.358112	0.912	0.426	0	0	BASP1	Granule cells
0	0.355087	0.682	0.235	0	0	ARHGAP6	Granule cells
0	0.355007	0.385	0.02	0	0	AJ006995.1	Granule cells
0	0.354891	0.292	0.06	0	0	AC067956.1	Granule cells
0	0.354716	0.632	0.204	0	0	RHBDL3	Granule cells
0	0.353214	0.736	0.234	0	0	LINC00599	Granule cells
0	0.353177	0.966	0.55	0	0	TENM4	Granule cells
0	0.352409	0.855	0.374	0	0	TMTC1	Granule cells
0	0.351721	0.738	0.281	0	0	DIRC3	Granule cells
0	0.351556	0.874	0.382	0	0	PPP2R2C	Granule cells
0	0.351462	0.383	0.033	0	0	TDO2	Granule cells
0	0.35072	0.997	0.796	0	0	ADGRL3	Granule cells
0	0.350712	0.8	0.33	0	0	DKK3	Granule cells
0	0.349885	0.758	0.269	0	0	PLPPR5	Granule cells
0	0.349418	0.867	0.474	0	0	MED27	Granule cells
0	0.349092	0.818	0.366	0	0	SLC39A10	Granule cells
0	0.348897	0.593	0.114	0	0	MFSD4A	Granule cells
0	0.348693	0.719	0.254	0	0	ILDR2	Granule cells
0	0.347445	0.599	0.154	0	0	GLT1D1	Granule cells
0	0.346887	0.792	0.334	0	0	TUSC3	Granule cells
0	0.346845	0.436	0.098	0	0	SLC5A4-AS1	Granule cells
0	0.346701	0.375	0.028	0	0	AL591518.1	Granule cells
0	0.346621	0.584	0.133	0	0	C4orf50	Granule cells
0	0.34656	0.77	0.316	0	0	NISCH	Granule cells
0	0.344786	0.535	0.149	0	0	AL445433.2	Granule cells
0	0.343687	0.893	0.467	0	0	EXOC6	Granule cells
0	0.343171	0.694	0.208	0	0	CACNG2	Granule cells
0	0.342427	0.579	0.16	0	0	COL21A1	Granule cells
0	0.340757	0.902	0.498	0	0	DMXL2	Granule cells
0	0.340298	0.498	0.109	0	0	MPP7	Granule cells
0	0.339615	0.992	0.848	0	0	PTK2	Granule cells
0	0.338678	0.801	0.301	0	0	KCNQ2	Granule cells
0	0.338253	0.654	0.181	0	0	SMPD3	Granule cells
0	0.33763	0.767	0.28	0	0	FAM189A1	Granule cells
0	0.33701	0.373	0.02	0	0	TNNT2	Granule cells
0	0.336795	0.991	0.909	0	0	LSAMP	Granule cells
0	0.336615	0.55	0.117	0	0	GLIS1	Granule cells
0	0.334818	0.539	0.095	0	0	NRN1	Granule cells
0	0.334429	0.382	0.022	0	0	C1QTNF9B	Granule cells
0	0.332898	0.724	0.265	0	0	POLN	Granule cells
0	0.33277	0.989	0.646	0	0	NRCAM	Granule cells
0	0.331053	0.459	0.061	0	0	BTNL9	Granule cells
0	0.329539	0.723	0.299	0	0	HNRNPLL	Granule cells
0	0.329135	0.571	0.125	0	0	TNFRSF25	Granule cells
0	0.328953	0.928	0.551	0	0	ROCK2	Granule cells
0	0.328512	0.569	0.131	0	0	SPTB	Granule cells
0	0.327712	0.779	0.306	0	0	GNG2	Granule cells
0	0.327328	0.713	0.256	0	0	SLC1A1	Granule cells
0	0.327236	0.719	0.223	0	0	AJAP1	Granule cells
0	0.327206	0.373	0.07	0	0	CYP1B1-AS1	Granule cells
0	0.326605	0.894	0.397	0	0	FAT3	Granule cells
0	0.326412	0.446	0.064	0	0	ADRA1B	Granule cells
0	0.32541	0.951	0.532	0	0	ASTN1	Granule cells
0	0.325268	0.281	0.056	0	0	LINC00534	Granule cells
0	0.325184	0.834	0.376	0	0	RAD9A	Granule cells
0	0.324269	0.749	0.241	0	0	MAST3	Granule cells
0	0.324088	0.821	0.364	0	0	C11orf80	Granule cells
0	0.323728	0.797	0.316	0	0	DGKZ	Granule cells
0	0.323666	0.95	0.542	0	0	HECW2	Granule cells
0	0.323657	0.989	0.836	0	0	AC016831.7	Granule cells
0	0.323465	0.848	0.436	0	0	TARBP1	Granule cells
0	0.323018	0.78	0.314	0	0	PITPNM2	Granule cells
0	0.322945	0.661	0.239	0	0	UXS1	Granule cells
0	0.321889	0.731	0.353	0	0	KSR1	Granule cells
0	0.320655	0.931	0.555	0	0	GLS	Granule cells
0	0.320433	0.722	0.275	0	0	MMD2	Granule cells
0	0.319918	0.778	0.346	0	0	CCDC57	Granule cells
0	0.31941	0.843	0.419	0	0	ARHGEF9	Granule cells
0	0.318881	0.909	0.312	0	0	MTUS2	Granule cells
0	0.318751	0.454	0.059	0	0	KCNG3	Granule cells
0	0.318245	0.966	0.658	0	0	MBNL2	Granule cells
0	0.318227	0.721	0.252	0	0	GLRB	Granule cells
0	0.317256	1	0.897	0	0	AUTS2	Granule cells
0	0.316978	0.629	0.158	0	0	PACSIN1	Granule cells
0	0.315301	0.699	0.236	0	0	ARHGAP20	Granule cells
0	0.314887	0.906	0.535	0	0	TNPO1	Granule cells
0	0.314728	0.703	0.317	0	0	SNAPC3	Granule cells
0	0.314032	0.962	0.674	0	0	PRKACB	Granule cells
0	0.312407	0.869	0.422	0	0	IDS	Granule cells
0	0.312052	0.803	0.34	0	0	MPP6	Granule cells
0	0.312018	0.58	0.131	0	0	UNC5A	Granule cells
0	0.310727	0.863	0.463	0	0	HLCS	Granule cells
0	0.308052	0.333	0.029	0	0	AL136985.3	Granule cells
0	0.307013	0.921	0.528	0	0	FBXW7	Granule cells
0	0.306837	0.647	0.191	0	0	JPH3	Granule cells
0	0.306793	0.498	0.087	0	0	VWA5B2	Granule cells
0	0.306706	0.765	0.278	0	0	BAIAP2	Granule cells
0	0.306467	0.862	0.437	0	0	AKAP8L	Granule cells
0	0.305838	0.502	0.12	0	0	B4GALNT3	Granule cells
0	0.305393	0.834	0.38	0	0	ZFYVE28	Granule cells
0	0.305374	0.417	0.079	0	0	AL442647.1	Granule cells
0	0.305279	0.703	0.279	0	0	CCDC138	Granule cells
0	0.303626	0.619	0.193	0	0	TUB	Granule cells
0	0.30318	0.758	0.327	0	0	IRAK1BP1	Granule cells
0	0.303071	0.612	0.177	0	0	SLC25A23	Granule cells
0	0.302772	0.534	0.107	0	0	LRMP	Granule cells
0	0.302667	0.792	0.349	0	0	LMTK2	Granule cells
0	0.302095	0.898	0.899	0	0	ZBTB20	Granule cells
0	0.302084	0.807	0.416	0	0	SLC44A5	Granule cells
0	0.302009	0.791	0.306	0	0	PAK5	Granule cells
0	0.301613	0.66	0.21	0	0	SLITRK5	Granule cells
0	0.300699	0.643	0.232	0	0	BEND6	Granule cells
0	0.30016	0.707	0.283	0	0	ITGA9	Granule cells
0	0.300025	0.538	0.135	0	0	PPP1R14C	Granule cells
0	0.299058	0.685	0.251	0	0	MEG3	Granule cells
0	0.298402	0.781	0.342	0	0	PRKCI	Granule cells
0	0.298172	0.823	0.496	0	0	PCDH7	Granule cells
0	0.297935	0.784	0.339	0	0	MAP2K1	Granule cells
0	0.297896	0.632	0.182	0	0	MAP7D2	Granule cells
0	0.297461	0.539	0.157	0	0	SNAP25-AS1	Granule cells
0	0.297395	0.549	0.143	0	0	CAMK1	Granule cells
0	0.296915	0.801	0.391	0	0	KCTD1	Granule cells
0	0.296572	0.429	0.042	0	0	C1QL3	Granule cells
0	0.295748	0.322	0.039	0	0	CASC6	Granule cells
0	0.295488	0.854	0.476	0	0	USP25	Granule cells
0	0.295191	0.4	0.047	0	0	AC023886.1	Granule cells
0	0.295075	0.396	0.032	0	0	MCOLN3	Granule cells
0	0.294231	0.916	0.546	0	0	KAT6B	Granule cells
0	0.2936	0.507	0.101	0	0	KCNC4	Granule cells
0	0.29334	0.787	0.336	0	0	NEXMIF	Granule cells
0	0.292075	0.984	0.622	0	0	PEX5L	Granule cells
0	0.291876	0.798	0.382	0	0	CCDC6	Granule cells
0	0.290801	0.454	0.109	0	0	LINC00970	Granule cells
0	0.290452	0.673	0.22	0	0	SEMA3C	Granule cells
0	0.29036	0.633	0.244	0	0	NPHP4	Granule cells
0	0.290266	0.575	0.195	0	0	RFLNA	Granule cells
0	0.289806	0.997	0.73	0	0	DPP6	Granule cells
0	0.289287	0.452	0.085	0	0	GFRA2	Granule cells
0	0.289162	0.972	0.665	0	0	ATP8A1	Granule cells
0	0.288295	0.61	0.201	0	0	RPS6KA6	Granule cells
0	0.286876	0.848	0.373	0	0	KIAA1549L	Granule cells
0	0.286798	0.543	0.142	0	0	LZTS3	Granule cells
0	0.286295	0.381	0.095	0	0	RSPO2	Granule cells
0	0.286198	0.966	0.614	0	0	RTN1	Granule cells
0	0.285941	0.683	0.289	0	0	NAPG	Granule cells
0	0.285142	0.624	0.19	0	0	2023-03-04	Granule cells
0	0.28503	0.919	0.559	0	0	ABI2	Granule cells
0	0.284616	0.845	0.434	0	0	NME7	Granule cells
0	0.284419	0.556	0.142	0	0	HOOK1	Granule cells
0	0.284354	0.879	0.444	0	0	NOL4	Granule cells
0	0.283601	0.829	0.404	0	0	ZER1	Granule cells
0	0.283362	0.641	0.185	0	0	RUNDC3A	Granule cells
0	0.28307	0.735	0.297	0	0	TPD52	Granule cells
0	0.282199	0.929	0.578	0	0	PI4KA	Granule cells
0	0.281686	0.693	0.244	0	0	LMTK3	Granule cells
0	0.281329	0.692	0.272	0	0	PPIP5K1	Granule cells
0	0.281229	0.492	0.154	0	0	MIR4500HG	Granule cells
0	0.281018	0.649	0.257	0	0	LEPR	Granule cells
0	0.280942	0.595	0.166	0	0	HLF	Granule cells
0	0.280803	0.761	0.343	0	0	RAPH1	Granule cells
0	0.280526	0.771	0.375	0	0	PATJ	Granule cells
0	0.280083	0.876	0.614	0	0	MT-ND2	Granule cells
0	0.280076	0.679	0.273	0	0	LINC02210-CRHR1	Granule cells
0	0.279885	0.831	0.416	0	0	LRRC8B	Granule cells
0	0.279531	0.648	0.2	0	0	PDE2A	Granule cells
0	0.279151	0.639	0.239	0	0	AC019205.1	Granule cells
0	0.278366	0.621	0.229	0	0	NAF1	Granule cells
0	0.27834	0.955	0.626	0	0	JAKMIP2	Granule cells
0	0.278111	0.926	0.508	0	0	OSBP2	Granule cells
0	0.277969	0.8	0.343	0	0	ADGRL1	Granule cells
0	0.277901	0.493	0.113	0	0	NGEF	Granule cells
0	0.277407	0.561	0.154	0	0	LINC02389	Granule cells
0	0.277306	0.892	0.618	0	0	ADD3	Granule cells
0	0.277298	0.516	0.128	0	0	AC011330.3	Granule cells
0	0.277057	0.704	0.315	0	0	AL645568.1	Granule cells
0	0.276995	0.905	0.428	0	0	SCN1A	Granule cells
0	0.276914	0.51	0.141	0	0	MGAT5B	Granule cells
0	0.27638	0.566	0.204	0	0	PCDH19	Granule cells
0	0.275676	0.927	0.589	0	0	NCKAP1	Granule cells
0	0.275504	0.625	0.189	0	0	RPH3A	Granule cells
0	0.275274	0.581	0.177	0	0	ITGA7	Granule cells
0	0.27504	0.645	0.162	0	0	PRKCG	Granule cells
0	0.27502	0.746	0.35	0	0	CDR2	Granule cells
0	0.274964	0.53	0.124	0	0	KCNH3	Granule cells
0	0.274245	0.353	0.037	0	0	CALB1	Granule cells
0	0.274219	0.778	0.31	0	0	PRKAR1B	Granule cells
0	0.273213	0.425	0.092	0	0	GLRA3	Granule cells
0	0.272849	0.536	0.131	0	0	GUCY1A1	Granule cells
0	0.27284	0.876	0.411	0	0	ATP2B2	Granule cells
0	0.272348	0.652	0.208	0	0	PSD	Granule cells
0	0.272056	0.566	0.177	0	0	AL590705.1	Granule cells
0	0.271795	0.488	0.106	0	0	PDE8B	Granule cells
0	0.271402	0.921	0.626	0	0	ATP9B	Granule cells
0	0.271347	0.482	0.104	0	0	NHSL2	Granule cells
0	0.268355	0.544	0.149	0	0	DLGAP3	Granule cells
0	0.267656	0.554	0.174	0	0	PTGR1	Granule cells
0	0.266995	0.854	0.432	0	0	PPFIBP1	Granule cells
0	0.266882	0.501	0.109	0	0	PLEKHG5	Granule cells
0	0.26674	0.506	0.105	0	0	SYNPO	Granule cells
0	0.266548	0.646	0.207	0	0	ADGRB2	Granule cells
0	0.265792	0.962	0.689	0	0	SPIDR	Granule cells
0	0.26573	0.85	0.451	0	0	KIFAP3	Granule cells
0	0.264988	0.323	0.022	0	0	NTF3	Granule cells
0	0.264639	0.647	0.242	0	0	LRFN2	Granule cells
0	0.264399	0.622	0.19	0	0	IQSEC3	Granule cells
0	0.264362	0.432	0.094	0	0	LINC00158	Granule cells
0	0.26396	0.798	0.471	0	0	MT-ND5	Granule cells
0	0.262916	0.617	0.172	0	0	SYN1	Granule cells
0	0.26247	0.437	0.121	0	0	AC087280.2	Granule cells
0	0.262111	0.644	0.3	0	0	RGS6	Granule cells
0	0.261662	0.74	0.316	0	0	AP3B2	Granule cells
0	0.261303	0.983	0.637	0	0	MACROD2	Granule cells
0	0.261057	0.707	0.262	0	0	ZBTB18	Granule cells
0	0.260811	0.74	0.302	0	0	FLNB	Granule cells
0	0.260189	0.914	0.472	0	0	MED12L	Granule cells
0	0.26	0.932	0.624	0	0	ACAP2	Granule cells
0	0.259971	0.494	0.132	0	0	FSIP1	Granule cells
0	0.2599	0.919	0.592	0	0	MAP2K5	Granule cells
0	0.259003	0.997	0.717	0	0	PDE4D	Granule cells
0	0.258546	0.619	0.168	0	0	CAMKV	Granule cells
0	0.258389	0.628	0.219	0	0	ZFR2	Granule cells
0	0.25833	0.642	0.266	0	0	RALA	Granule cells
0	0.257937	0.53	0.143	0	0	ANKRD42	Granule cells
0	0.257806	0.788	0.401	0	0	TET3	Granule cells
0	0.257795	0.48	0.144	0	0	ANKRD29	Granule cells
0	0.257492	0.674	0.386	0	0	TTN-AS1	Granule cells
0	0.257212	0.429	0.118	0	0	CXXC4-AS1	Granule cells
0	0.256926	0.759	0.405	0	0	PCSK5	Granule cells
0	0.256865	0.679	0.268	0	0	MAP6	Granule cells
0	0.256626	0.715	0.308	0	0	LRP12	Granule cells
0	0.255147	0.7	0.224	0	0	NYAP2	Granule cells
0	0.254341	0.752	0.245	0	0	SCN3B	Granule cells
0	0.25413	0.42	0.11	0	0	SLC35F4	Granule cells
0	0.254075	0.642	0.275	0	0	TTC8	Granule cells
0	0.253479	0.492	0.13	0	0	AC113383.1	Granule cells
0	0.25271	0.987	0.535	0	0	KCND2	Granule cells
0	0.252586	0.997	0.567	0	0	DCLK1	Granule cells
0	0.252351	0.786	0.313	0	0	LGI1	Granule cells
0	0.25222	0.393	0.058	0	0	FBLN7	Granule cells
0	0.251786	0.939	0.633	0	0	WDR7	Granule cells
0	0.251456	0.995	0.842	0	0	GPHN	Granule cells
0	0.251429	0.626	0.185	0	0	ST8SIA3	Granule cells
0	0.250921	0.894	0.553	0	0	TTC7B	Granule cells
0	0.2505	0.804	0.373	0	0	ACAP3	Granule cells
0	0.250201	0.966	0.661	0	0	RTN3	Granule cells
1.22352e-149	0.58681	0.695	0.499	4.10343e-145	0	IQCJ-SCHIP1	Granule cells
0	1.74395	0.877	0.294	0	1	NRG1	Granule cells
0	1.73563	0.545	0.197	0	1	NR2F2-AS1	Granule cells
0	1.60244	0.961	0.706	0	1	ROBO1	Granule cells
0	1.56259	0.765	0.353	0	1	SGCZ	Granule cells
0	1.41786	0.645	0.314	0	1	CASC15	Granule cells
0	1.36012	0.966	0.432	0	1	FAM19A1	Granule cells
0	1.25055	0.921	0.392	0	1	EPHA5	Granule cells
0	1.23946	0.913	0.372	0	1	LINC01122	Granule cells
0	1.23577	0.849	0.416	0	1	MGAT4C	Granule cells
0	1.20534	0.726	0.497	0	1	IQCJ-SCHIP1	Granule cells
0	1.18371	0.646	0.141	0	1	CCBE1	Granule cells
0	1.17872	0.95	0.494	0	1	FAM19A2	Granule cells
0	1.17129	0.569	0.149	0	1	EPHA3	Granule cells
0	1.13906	0.933	0.499	0	1	DCC	Granule cells
0	1.10822	0.922	0.334	0	1	MIR137HG	Granule cells
0	1.09215	0.999	0.71	0	1	RBFOX1	Granule cells
0	1.08465	0.883	0.344	0	1	HECW1	Granule cells
0	1.07062	0.719	0.305	0	1	CDH12	Granule cells
0	1.03656	0.794	0.365	0	1	ADGRL2	Granule cells
0	1.03589	0.968	0.427	0	1	CACNA1E	Granule cells
0	1.0287	0.602	0.136	0	1	ADAMTS3	Granule cells
0	1.01767	0.543	0.113	0	1	CLMP	Granule cells
0	1.011	0.867	0.332	0	1	KCNB2	Granule cells
0	1.01071	0.993	0.695	0	1	GRIA2	Granule cells
0	0.983514	0.893	0.4	0	1	LINGO2	Granule cells
0	0.968241	0.782	0.409	0	1	KCNQ5	Granule cells
0	0.967694	0.635	0.437	0	1	MEIS2	Granule cells
0	0.967215	0.967	0.643	0	1	LRRTM4	Granule cells
0	0.966503	0.819	0.41	0	1	DLGAP2	Granule cells
0	0.964052	0.987	0.493	0	1	PTPRN2	Granule cells
0	0.947994	1	0.732	0	1	FAM155A	Granule cells
0	0.937455	0.978	0.572	0	1	ROBO2	Granule cells
0	0.931569	0.988	0.452	0	1	MYT1L	Granule cells
0	0.926844	0.991	0.574	0	1	CCSER1	Granule cells
0	0.915895	0.795	0.485	0	1	HS6ST3	Granule cells
0	0.914329	0.872	0.423	0	1	KHDRBS2	Granule cells
0	0.912268	0.564	0.253	0	1	CPNE4	Granule cells
0	0.895745	0.687	0.275	0	1	RIT2	Granule cells
0	0.886495	0.792	0.336	0	1	KCNH7	Granule cells
0	0.883589	0.984	0.554	0	1	SNTG1	Granule cells
0	0.882982	1	0.83	0	1	ANKS1B	Granule cells
0	0.880504	0.821	0.436	0	1	RALYL	Granule cells
0	0.879103	0.937	0.447	0	1	LRFN5	Granule cells
0	0.873847	0.999	0.707	0	1	LRRC7	Granule cells
0	0.859065	0.901	0.411	0	1	SLC44A5	Granule cells
0	0.846704	0.861	0.391	0	1	LDB2	Granule cells
0	0.843281	0.947	0.688	0	1	PHACTR1	Granule cells
0	0.840371	0.995	0.696	0	1	CNTNAP2	Granule cells
0	0.827887	0.997	0.644	0	1	KALRN	Granule cells
0	0.827541	0.968	0.535	0	1	AFF3	Granule cells
0	0.826507	0.908	0.452	0	1	SORBS2	Granule cells
0	0.821712	0.836	0.565	0	1	OPCML	Granule cells
0	0.819113	0.886	0.395	0	1	PTPRO	Granule cells
0	0.813026	0.903	0.55	0	1	STXBP5L	Granule cells
0	0.808602	0.98	0.536	0	1	GRIA1	Granule cells
0	0.806308	0.596	0.252	0	1	NELL1	Granule cells
0	0.799685	0.896	0.371	0	1	PLXNA4	Granule cells
0	0.791178	0.952	0.544	0	1	KCND2	Granule cells
0	0.79093	1	0.7	0	1	DLGAP1	Granule cells
0	0.785222	1	0.784	0	1	CELF2	Granule cells
0	0.781538	0.99	0.816	0	1	PTPRD	Granule cells
0	0.777065	0.952	0.493	0	1	PDE1A	Granule cells
0	0.775493	0.924	0.48	0	1	ARPP21	Granule cells
0	0.771922	0.757	0.458	0	1	CACNA2D3	Granule cells
0	0.767046	0.77	0.332	0	1	SLIT2	Granule cells
0	0.765877	0.714	0.297	0	1	FGF13	Granule cells
0	0.765721	1	0.763	0	1	NRXN1	Granule cells
0	0.764045	0.911	0.4	0	1	CACNA1B	Granule cells
0	0.757836	0.68	0.217	0	1	AFF2	Granule cells
0	0.753191	0.861	0.385	0	1	DOK6	Granule cells
0	0.747611	0.756	0.36	0	1	NRP1	Granule cells
0	0.746616	0.405	0.175	0	1	TRHDE	Granule cells
0	0.7412	0.917	0.418	0	1	CDH8	Granule cells
0	0.738911	0.895	0.396	0	1	SHANK2	Granule cells
0	0.733071	0.794	0.452	0	1	CNTN5	Granule cells
0	0.73266	0.818	0.369	0	1	PID1	Granule cells
0	0.730552	0.368	0.063	0	1	PRSS12	Granule cells
0	0.729414	0.417	0.144	0	1	AC011287.1	Granule cells
0	0.727556	0.974	0.696	0	1	MSRA	Granule cells
0	0.727333	0.425	0.129	0	1	EYS	Granule cells
0	0.725315	0.93	0.711	0	1	NEGR1	Granule cells
0	0.725138	0.913	0.492	0	1	RIMS1	Granule cells
0	0.721752	0.986	0.722	0	1	PDE4D	Granule cells
0	0.718462	0.999	0.738	0	1	FRMD4A	Granule cells
0	0.717381	0.76	0.293	0	1	BASP1-AS1	Granule cells
0	0.711238	0.873	0.541	0	1	CACNA1C	Granule cells
0	0.710649	0.93	0.659	0	1	R3HDM1	Granule cells
0	0.70938	0.817	0.534	0	1	NKAIN3	Granule cells
0	0.703397	0.379	0.08	0	1	SOX11	Granule cells
0	0.701359	0.875	0.445	0	1	KHDRBS3	Granule cells
0	0.692246	0.673	0.319	0	1	RBFOX3	Granule cells
0	0.69165	0.993	0.67	0	1	MAP2	Granule cells
0	0.690377	0.736	0.256	0	1	STMN2	Granule cells
0	0.684229	0.815	0.376	0	1	CELF4	Granule cells
0	0.682787	0.912	0.721	0	1	TTC28	Granule cells
0	0.680672	0.548	0.251	0	1	FSTL5	Granule cells
0	0.678549	0.97	0.475	0	1	NELL2	Granule cells
0	0.678507	0.559	0.205	0	1	ST6GAL2	Granule cells
0	0.675642	0.942	0.491	0	1	GRIN2B	Granule cells
0	0.675248	0.942	0.614	0	1	MLLT3	Granule cells
0	0.673003	0.585	0.278	0	1	CHRM3	Granule cells
0	0.672708	0.954	0.644	0	1	MACROD2	Granule cells
0	0.671237	0.719	0.295	0	1	GABRG3	Granule cells
0	0.67054	0.641	0.332	0	1	EPHB1	Granule cells
0	0.669715	0.764	0.403	0	1	MEG8	Granule cells
0	0.668144	0.894	0.458	0	1	GABRB3	Granule cells
0	0.667177	0.735	0.308	0	1	KLHL29	Granule cells
0	0.666375	0.697	0.345	0	1	ASXL3	Granule cells
0	0.665082	0.582	0.213	0	1	LINC02223	Granule cells
0	0.664219	0.614	0.254	0	1	EFNA5	Granule cells
0	0.664127	0.832	0.687	0	1	KCNIP4	Granule cells
0	0.659004	0.612	0.274	0	1	AL662796.1	Granule cells
0	0.654798	0.942	0.586	0	1	NEDD4L	Granule cells
0	0.654753	0.711	0.381	0	1	CDH13	Granule cells
0	0.652895	0.747	0.283	0	1	MIAT	Granule cells
0	0.652082	0.686	0.536	0	1	RYR2	Granule cells
0	0.651	0.923	0.557	0	1	TMEM178B	Granule cells
0	0.648573	0.736	0.507	0	1	TENM2	Granule cells
0	0.648312	0.998	0.898	0	1	AUTS2	Granule cells
0	0.648243	0.983	0.648	0	1	SLC8A1	Granule cells
0	0.644664	0.663	0.251	0	1	PTPRR	Granule cells
0	0.637608	0.299	0.049	0	1	AC012409.2	Granule cells
0	0.633037	0.939	0.465	0	1	SLC4A10	Granule cells
0	0.632844	0.519	0.261	0	1	NR2F1	Granule cells
0	0.629696	0.777	0.48	0	1	GRM7	Granule cells
0	0.62916	0.542	0.251	0	1	ZNF385B	Granule cells
0	0.627122	0.943	0.716	0	1	PBX1	Granule cells
0	0.625909	0.799	0.452	0	1	GALNT18	Granule cells
0	0.624704	0.705	0.361	0	1	SH3GL2	Granule cells
0	0.624573	0.775	0.388	0	1	ANKRD30BL	Granule cells
0	0.622794	0.784	0.299	0	1	SRRM4	Granule cells
0	0.621916	0.756	0.315	0	1	PAK5	Granule cells
0	0.619368	0.696	0.31	0	1	SLIT3	Granule cells
0	0.617615	0.741	0.457	0	1	NR2F1-AS1	Granule cells
0	0.617474	0.711	0.331	0	1	LUZP2	Granule cells
0	0.615492	0.638	0.443	0	1	EPHA6	Granule cells
0	0.615128	0.608	0.284	0	1	SV2B	Granule cells
0	0.615073	0.612	0.161	0	1	ELAVL2	Granule cells
0	0.613227	0.819	0.485	0	1	GRAMD1B	Granule cells
0	0.609789	0.476	0.139	0	1	LINC00923	Granule cells
0	0.609394	0.953	0.564	0	1	UNC79	Granule cells
0	0.608559	0.852	0.378	0	1	NMNAT2	Granule cells
0	0.605827	0.965	0.606	0	1	SYT1	Granule cells
0	0.605718	0.321	0.069	0	1	AC022523.1	Granule cells
0	0.604662	0.494	0.169	0	1	NWD2	Granule cells
0	0.602807	0.516	0.199	0	1	FRAS1	Granule cells
0	0.601887	0.782	0.334	0	1	KCNJ6	Granule cells
0	0.600912	0.806	0.398	0	1	CDH10	Granule cells
0	0.599113	0.889	0.514	0	1	GRM5	Granule cells
0	0.59791	0.452	0.248	0	1	SEMA3C	Granule cells
0	0.594071	0.9	0.434	0	1	PAK3	Granule cells
0	0.58929	0.834	0.569	0	1	TENM4	Granule cells
0	0.588181	0.585	0.211	0	1	NDST3	Granule cells
0	0.588008	0.868	0.498	0	1	GRIA3	Granule cells
0	0.587399	0.742	0.359	0	1	HCN1	Granule cells
0	0.585773	0.78	0.415	0	1	ST6GALNAC5	Granule cells
0	0.583722	0.944	0.522	0	1	CNKSR2	Granule cells
0	0.580184	0.819	0.346	0	1	RIMBP2	Granule cells
0	0.579331	0.611	0.414	0	1	CNTNAP5	Granule cells
0	0.579329	0.837	0.498	0	1	PCDH7	Granule cells
0	0.579045	0.661	0.378	0	1	SEMA6D	Granule cells
0	0.578003	0.765	0.386	0	1	ZNF804A	Granule cells
0	0.57709	0.455	0.159	0	1	AC120193.1	Granule cells
0	0.576267	0.374	0.112	0	1	SOX4	Granule cells
0	0.574792	0.69	0.353	0	1	EPHA4	Granule cells
0	0.574399	0.868	0.605	0	1	DAB1	Granule cells
0	0.571351	0.51	0.208	0	1	OLFM3	Granule cells
0	0.570106	0.904	0.535	0	1	SETBP1	Granule cells
0	0.569843	0.734	0.418	0	1	GALNT17	Granule cells
0	0.561366	0.784	0.385	0	1	KIAA1549L	Granule cells
0	0.56003	0.523	0.264	0	1	CADPS2	Granule cells
0	0.557894	0.64	0.386	0	1	CLSTN2	Granule cells
0	0.556759	0.92	0.576	0	1	CERS6	Granule cells
0	0.555348	0.827	0.466	0	1	CALN1	Granule cells
0	0.553807	0.933	0.598	0	1	CDK14	Granule cells
0	0.55321	0.724	0.379	0	1	KIAA1211	Granule cells
0	0.551311	0.549	0.166	0	1	LHX2	Granule cells
0	0.5508	0.796	0.385	0	1	GABBR2	Granule cells
0	0.543579	0.997	0.749	0	1	CTNNA2	Granule cells
0	0.543484	0.748	0.348	0	1	NCALD	Granule cells
0	0.542236	0.724	0.346	0	1	CNTN3	Granule cells
0	0.539745	1	0.893	0	1	ADGRB3	Granule cells
0	0.538981	0.394	0.134	0	1	FSTL4	Granule cells
0	0.538794	0.753	0.345	0	1	SGSM1	Granule cells
0	0.53754	0.74	0.387	0	1	CAMK4	Granule cells
0	0.53627	0.665	0.388	0	1	MAST2	Granule cells
0	0.535687	0.781	0.456	0	1	MAGI3	Granule cells
0	0.535285	0.792	0.422	0	1	RUNX1T1	Granule cells
0	0.533977	0.884	0.5	0	1	FGF12	Granule cells
0	0.533077	0.697	0.386	0	1	KSR2	Granule cells
0	0.532551	0.356	0.12	0	1	CUX2	Granule cells
0	0.527575	0.335	0.081	0	1	TMEM196	Granule cells
0	0.527193	0.894	0.457	0	1	SCN2A	Granule cells
0	0.526548	0.429	0.185	0	1	PCDH11X	Granule cells
0	0.52631	0.963	0.699	0	1	LRRC4C	Granule cells
0	0.526047	0.553	0.22	0	1	RAB27B	Granule cells
0	0.525223	0.527	0.232	0	1	LINC01250	Granule cells
0	0.52389	0.761	0.375	0	1	C11orf80	Granule cells
0	0.522177	0.554	0.253	0	1	KIAA1211L	Granule cells
0	0.522148	0.611	0.26	0	1	BCL11A	Granule cells
0	0.521332	0.747	0.378	0	1	SYN3	Granule cells
0	0.518647	0.947	0.658	0	1	SRGAP3	Granule cells
0	0.517505	0.906	0.711	0	1	CSMD1	Granule cells
0	0.517049	0.875	0.487	0	1	KCTD16	Granule cells
0	0.517005	0.879	0.439	0	1	ATP8A2	Granule cells
0	0.515782	0.746	0.322	0	1	SLIT1	Granule cells
0	0.515303	0.798	0.416	0	1	MYH10	Granule cells
0	0.513709	0.668	0.371	0	1	ASIC2	Granule cells
0	0.511614	0.764	0.402	0	1	SYN2	Granule cells
0	0.511134	0.794	0.406	0	1	SCN3A	Granule cells
0	0.510992	0.815	0.435	0	1	PRKAG2	Granule cells
0	0.510388	0.489	0.158	0	1	DCX	Granule cells
0	0.508537	0.89	0.524	0	1	CPE	Granule cells
0	0.507647	0.676	0.408	0	1	PPP2R2C	Granule cells
0	0.505509	0.881	0.511	0	1	ATRNL1	Granule cells
0	0.502012	0.644	0.339	0	1	AMPH	Granule cells
0	0.500613	0.614	0.263	0	1	CACNG3	Granule cells
0	0.498	0.619	0.314	0	1	HOMER1	Granule cells
0	0.497808	0.717	0.397	0	1	MIPOL1	Granule cells
0	0.497638	0.617	0.306	0	1	AP001347.1	Granule cells
0	0.49738	0.87	0.512	0	1	TMEM108	Granule cells
0	0.493503	0.597	0.342	0	1	FNBP1L	Granule cells
0	0.492839	0.487	0.266	0	1	DPY19L1	Granule cells
0	0.491985	0.59	0.263	0	1	SPHKAP	Granule cells
0	0.49065	0.357	0.109	0	1	GLRA2	Granule cells
0	0.490639	0.715	0.317	0	1	ADD2	Granule cells
0	0.489176	0.649	0.259	0	1	KIAA1324	Granule cells
0	0.487101	0.937	0.693	0	1	PRKCE	Granule cells
0	0.486712	0.98	0.716	0	1	DPYD	Granule cells
0	0.486274	0.987	0.611	0	1	GRIK2	Granule cells
0	0.484552	0.727	0.38	0	1	PLXNA2	Granule cells
0	0.48364	0.972	0.707	0	1	AC092691.1	Granule cells
0	0.483085	0.571	0.329	0	1	NETO1	Granule cells
0	0.48208	0.676	0.377	0	1	PGBD5	Granule cells
0	0.481812	0.738	0.33	0	1	CELF5	Granule cells
0	0.481088	0.837	0.46	0	1	SCN8A	Granule cells
0	0.480155	0.86	0.546	0	1	KIF21A	Granule cells
0	0.477758	0.762	0.457	0	1	PGAP1	Granule cells
0	0.476888	0.816	0.558	0	1	ERC2	Granule cells
0	0.475965	0.762	0.393	0	1	GUCY1A2	Granule cells
0	0.475909	0.842	0.439	0	1	BASP1	Granule cells
0	0.475908	0.301	0.078	0	1	TSPAN18	Granule cells
0	0.475716	0.602	0.229	0	1	RNF165	Granule cells
0	0.47442	0.845	0.565	0	1	FOCAD	Granule cells
0	0.474222	0.494	0.244	0	1	RASGEF1B	Granule cells
0	0.473219	0.661	0.285	0	1	PLPPR5	Granule cells
0	0.472199	0.671	0.304	0	1	KIAA1549	Granule cells
0	0.47028	0.516	0.199	0	1	EFNB2	Granule cells
0	0.469866	0.309	0.054	0	1	LINC02254	Granule cells
0	0.467529	0.751	0.38	0	1	SHC3	Granule cells
0	0.466665	0.479	0.259	0	1	PTPRT	Granule cells
0	0.46625	0.705	0.32	0	1	SRRM3	Granule cells
0	0.466057	0.521	0.2	0	1	SMPD3	Granule cells
0	0.464824	0.965	0.685	0	1	ENOX1	Granule cells
0	0.463134	0.994	0.807	0	1	NLGN1	Granule cells
0	0.462755	0.997	0.757	0	1	ANK3	Granule cells
0	0.462561	0.687	0.326	0	1	PCSK2	Granule cells
0	0.460969	0.753	0.58	0	1	AGBL4	Granule cells
0	0.460158	0.7	0.472	0	1	RIMS2	Granule cells
0	0.459177	0.856	0.506	0	1	SH3RF3	Granule cells
0	0.457284	0.286	0.056	0	1	ST8SIA2	Granule cells
0	0.456942	0.952	0.65	0	1	PLCB1	Granule cells
0	0.455485	0.72	0.422	0	1	FRMPD4	Granule cells
0	0.455334	0.871	0.572	0	1	ARL15	Granule cells
0	0.454019	0.373	0.129	0	1	MLIP	Granule cells
0	0.453144	0.345	0.103	0	1	NR2F2	Granule cells
0	0.451245	0.71	0.366	0	1	PDE10A	Granule cells
0	0.450601	0.545	0.229	0	1	CACNG2	Granule cells
0	0.448452	0.314	0.107	0	1	VWC2L	Granule cells
0	0.444663	0.323	0.106	0	1	SLCO5A1	Granule cells
0	0.44445	0.644	0.265	0	1	MAST1	Granule cells
0	0.444215	0.412	0.116	0	1	LINC01197	Granule cells
0	0.443263	0.873	0.536	0	1	FRY	Granule cells
0	0.441423	0.629	0.329	0	1	KIF26B	Granule cells
0	0.44101	0.58	0.246	0	1	LIN7A	Granule cells
0	0.438672	0.574	0.261	0	1	BCL11B	Granule cells
0	0.436419	0.735	0.386	0	1	ME3	Granule cells
0	0.43597	0.833	0.495	0	1	SNAP91	Granule cells
0	0.43495	0.814	0.465	0	1	SPTBN4	Granule cells
0	0.434842	0.856	0.403	0	1	SEZ6L	Granule cells
0	0.433707	0.917	0.54	0	1	KCNQ3	Granule cells
0	0.432881	0.646	0.288	0	1	RUNDC3B	Granule cells
0	0.430452	0.832	0.489	0	1	MARK1	Granule cells
0	0.429571	0.733	0.43	0	1	SHISA9	Granule cells
0	0.428666	0.458	0.124	0	1	PALMD	Granule cells
0	0.4285	0.672	0.347	0	1	ACVR2A	Granule cells
0	0.427626	0.797	0.599	0	1	RGS7	Granule cells
0	0.427211	0.788	0.459	0	1	NOL4	Granule cells
0	0.426153	0.83	0.506	0	1	GMDS	Granule cells
0	0.422717	0.991	0.813	0	1	NAV3	Granule cells
0	0.422167	0.303	0.086	0	1	IGSF3	Granule cells
0	0.422117	0.653	0.334	0	1	PKIA	Granule cells
0	0.420754	0.657	0.324	0	1	GNG2	Granule cells
0	0.419924	0.98	0.77	0	1	NBEA	Granule cells
0	0.419664	0.532	0.332	0	1	AC097376.2	Granule cells
0	0.418914	0.624	0.332	0	1	RAP1GAP2	Granule cells
0	0.418455	0.814	0.582	0	1	HDAC4	Granule cells
0	0.417854	0.85	0.526	0	1	PCLO	Granule cells
0	0.416649	0.346	0.133	0	1	SVIL	Granule cells
0	0.414915	0.836	0.496	0	1	AC073050.1	Granule cells
0	0.414711	0.371	0.138	0	1	PLCXD3	Granule cells
0	0.41469	0.663	0.344	0	1	MTUS2	Granule cells
0	0.414356	0.573	0.279	0	1	PRR16	Granule cells
0	0.413342	0.704	0.405	0	1	LMO3	Granule cells
0	0.412717	0.527	0.274	0	1	COL25A1	Granule cells
0	0.412501	0.679	0.356	0	1	FBXL2	Granule cells
0	0.412193	0.683	0.319	0	1	KCNQ2	Granule cells
0	0.410687	0.538	0.258	0	1	LRFN2	Granule cells
0	0.405112	0.46	0.214	0	1	CABP1	Granule cells
0	0.404238	0.667	0.367	0	1	SYBU	Granule cells
0	0.40403	0.614	0.254	0	1	SVOP	Granule cells
0	0.403712	0.668	0.34	0	1	FAR2	Granule cells
0	0.402966	0.545	0.218	0	1	LNX1	Granule cells
0	0.399498	0.886	0.544	0	1	ASTN1	Granule cells
0	0.39895	0.815	0.473	0	1	LINC00632	Granule cells
0	0.398751	0.757	0.405	0	1	XKR4	Granule cells
0	0.398719	0.58	0.259	0	1	MAN1A1	Granule cells
0	0.39863	0.55	0.259	0	1	FRMD3	Granule cells
0	0.397882	0.721	0.428	0	1	CCDC171	Granule cells
0	0.395456	0.543	0.252	0	1	CCDC148	Granule cells
0	0.394522	0.599	0.263	0	1	ELAVL4	Granule cells
0	0.393283	0.69	0.347	0	1	PLEKHA6	Granule cells
0	0.392728	0.855	0.556	0	1	APBA1	Granule cells
0	0.392657	0.266	0.086	0	1	MN1	Granule cells
0	0.390846	0.726	0.313	0	1	CA10	Granule cells
0	0.390479	0.787	0.532	0	1	TIAM2	Granule cells
0	0.38984	0.283	0.094	0	1	GLYATL2	Granule cells
0	0.388858	0.527	0.227	0	1	YPEL1	Granule cells
0	0.388701	0.698	0.379	0	1	GABRA2	Granule cells
0	0.388195	0.949	0.624	0	1	CSMD3	Granule cells
0	0.388145	0.759	0.514	0	1	CACNA1A	Granule cells
0	0.387844	0.622	0.318	0	1	NUP93	Granule cells
0	0.387457	0.733	0.403	0	1	PAK1	Granule cells
0	0.38663	0.869	0.56	0	1	ST7	Granule cells
0	0.386484	0.726	0.478	0	1	GRIN2A	Granule cells
0	0.386314	0.598	0.319	0	1	ANO5	Granule cells
0	0.386265	0.794	0.522	0	1	TFDP2	Granule cells
0	0.385569	0.451	0.193	0	1	SNX7	Granule cells
0	0.384657	0.73	0.437	0	1	MCTP1	Granule cells
0	0.384393	0.845	0.554	0	1	PTPN4	Granule cells
0	0.383914	0.54	0.256	0	1	HMGCLL1	Granule cells
0	0.383863	0.885	0.584	0	1	HIVEP3	Granule cells
0	0.382457	0.425	0.113	0	1	AL445623.2	Granule cells
0	0.381708	0.807	0.537	0	1	MICU1	Granule cells
0	0.380631	0.467	0.265	0	1	FAT4	Granule cells
0	0.379919	0.901	0.516	0	1	SNAP25	Granule cells
0	0.379068	0.414	0.224	0	1	SATB2	Granule cells
0	0.378289	0.827	0.531	0	1	DGKI	Granule cells
0	0.377122	0.857	0.601	0	1	MAPK8	Granule cells
0	0.376461	0.937	0.728	0	1	ERC1	Granule cells
0	0.375456	0.669	0.383	0	1	CDHR3	Granule cells
0	0.374506	0.619	0.288	0	1	CLVS2	Granule cells
0	0.373325	0.985	0.781	0	1	MAPK10	Granule cells
0	0.372443	0.533	0.253	0	1	SLF1	Granule cells
0	0.371101	0.421	0.206	0	1	RFC3	Granule cells
0	0.370871	0.552	0.269	0	1	MEG3	Granule cells
0	0.370422	0.277	0.131	0	1	LINC01102	Granule cells
0	0.369698	0.421	0.165	0	1	MIR4500HG	Granule cells
0	0.368591	0.718	0.422	0	1	FAM135B	Granule cells
0	0.368267	0.666	0.406	0	1	ZC2HC1A	Granule cells
0	0.367096	0.615	0.35	0	1	CAMK2A	Granule cells
0	0.364073	0.602	0.344	0	1	ARMC9	Granule cells
0	0.362995	0.465	0.23	0	1	CACNB4	Granule cells
0	0.362827	0.435	0.203	0	1	PKN2-AS1	Granule cells
0	0.361349	0.809	0.52	0	1	APBA2	Granule cells
0	0.361293	0.623	0.284	0	1	JPH4	Granule cells
0	0.360434	0.454	0.235	0	1	KCNN2	Granule cells
0	0.359817	0.671	0.288	0	1	GAP43	Granule cells
0	0.359776	0.54	0.314	0	1	RGS6	Granule cells
0	0.359326	0.869	0.552	0	1	CSRNP3	Granule cells
0	0.359091	0.569	0.282	0	1	PRKAR2B	Granule cells
0	0.358514	0.638	0.329	0	1	AC090568.2	Granule cells
0	0.35761	0.66	0.354	0	1	NEXMIF	Granule cells
0	0.3575	0.811	0.562	0	1	CACNB2	Granule cells
0	0.355552	0.38	0.129	0	1	ARHGAP28	Granule cells
0	0.354639	0.735	0.418	0	1	PACRG	Granule cells
0	0.352851	0.642	0.428	0	1	CHSY3	Granule cells
0	0.349611	0.495	0.209	0	1	2023-03-04	Granule cells
0	0.349363	0.459	0.232	0	1	AC024901.1	Granule cells
0	0.348722	0.584	0.295	0	1	CCDC3	Granule cells
0	0.348638	0.647	0.422	0	1	EML6	Granule cells
0	0.348429	0.538	0.246	0	1	NYAP2	Granule cells
0	0.347829	0.763	0.508	0	1	XPR1	Granule cells
0	0.347728	0.677	0.361	0	1	GPR158	Granule cells
0	0.346592	0.656	0.332	0	1	CRMP1	Granule cells
0	0.346177	0.796	0.477	0	1	SLC2A13	Granule cells
0	0.345732	0.666	0.352	0	1	TUSC3	Granule cells
0	0.345565	0.52	0.272	0	1	AFAP1	Granule cells
0	0.345063	0.988	0.573	0	1	DCLK1	Granule cells
0	0.344563	0.666	0.385	0	1	WNK2	Granule cells
0	0.344337	0.554	0.353	0	1	C15orf41	Granule cells
0	0.34305	0.53	0.278	0	1	ABLIM2	Granule cells
0	0.341589	0.942	0.641	0	1	PLEKHA5	Granule cells
0	0.341397	0.905	0.57	0	1	PRKG1	Granule cells
0	0.341131	0.884	0.593	0	1	KIF5C	Granule cells
0	0.341114	0.898	0.582	0	1	AK5	Granule cells
0	0.340754	0.729	0.392	0	1	PLCL2	Granule cells
0	0.34073	0.542	0.309	0	1	FAM189A1	Granule cells
0	0.340574	0.899	0.572	0	1	CHL1	Granule cells
0	0.339814	0.92	0.57	0	1	GABRB1	Granule cells
0	0.336751	0.818	0.533	0	1	PTPRS	Granule cells
0	0.336192	0.525	0.269	0	1	BICDL1	Granule cells
0	0.336075	0.64	0.429	0	1	FAT3	Granule cells
0	0.336004	0.935	0.692	0	1	CACNA2D1	Granule cells
0	0.335665	0.931	0.686	0	1	RAPGEF2	Granule cells
0	0.335227	0.53	0.29	0	1	CNTN4	Granule cells
0	0.33506	0.761	0.459	0	1	RNF150	Granule cells
0	0.334441	0.62	0.311	0	1	MYO16	Granule cells
0	0.333989	0.53	0.327	0	1	SUSD4	Granule cells
0	0.333048	0.586	0.308	0	1	TENM1	Granule cells
0	0.331522	0.479	0.2	0	1	RASGRP1	Granule cells
0	0.330912	0.834	0.573	0	1	EXT1	Granule cells
0	0.33048	0.663	0.394	0	1	TENM3	Granule cells
0	0.32901	0.51	0.253	0	1	NREP	Granule cells
0	0.328619	0.323	0.089	0	1	MDGA1	Granule cells
0	0.328389	0.707	0.417	0	1	SPATS2	Granule cells
0	0.328357	0.725	0.42	0	1	DLGAP4	Granule cells
0	0.32743	0.877	0.633	0	1	PTPRG	Granule cells
0	0.327241	0.642	0.322	0	1	KCNB1	Granule cells
0	0.326951	0.835	0.561	0	1	HIVEP2	Granule cells
0	0.32655	0.639	0.395	0	1	NOS1AP	Granule cells
0	0.325669	0.738	0.463	0	1	MAP3K13	Granule cells
0	0.324298	0.807	0.531	0	1	EVL	Granule cells
0	0.323446	0.514	0.219	0	1	PDE2A	Granule cells
0	0.323002	0.67	0.372	0	1	UPP2	Granule cells
0	0.322946	0.676	0.373	0	1	ARHGAP44	Granule cells
0	0.322595	0.552	0.268	0	1	HIC2	Granule cells
0	0.322509	0.501	0.206	0	1	CHD3	Granule cells
0	0.322273	0.396	0.146	0	1	AL117190.2	Granule cells
0	0.322136	0.986	0.746	0	1	PPFIA2	Granule cells
0	0.322065	0.437	0.205	0	1	ZNF33B	Granule cells
0	0.32136	0.67	0.343	0	1	CLVS1	Granule cells
0	0.321206	0.694	0.385	0	1	WASF1	Granule cells
0	0.320892	0.291	0.062	0	1	BHLHE22	Granule cells
0	0.320831	0.969	0.744	0	1	TANC2	Granule cells
0	0.320567	0.892	0.471	0	1	MMP16	Granule cells
0	0.320497	0.796	0.515	0	1	ATXN7L1	Granule cells
0	0.320408	0.672	0.39	0	1	PATJ	Granule cells
0	0.320255	0.585	0.272	0	1	GLRB	Granule cells
0	0.319986	0.633	0.353	0	1	FSD1L	Granule cells
0	0.317399	0.997	0.909	0	1	LSAMP	Granule cells
0	0.317064	0.664	0.443	0	1	VPS13A	Granule cells
0	0.316941	0.654	0.391	0	1	LINC01322	Granule cells
0	0.315477	0.575	0.261	0	1	LHFPL4	Granule cells
0	0.315045	0.88	0.643	0	1	ARHGAP32	Granule cells
0	0.313261	0.449	0.185	0	1	SHANK1	Granule cells
0	0.312473	0.585	0.295	0	1	UNC13A	Granule cells
0	0.310915	0.57	0.293	0	1	KIAA0319	Granule cells
0	0.310313	0.855	0.585	0	1	NTRK3	Granule cells
0	0.310032	0.942	0.68	0	1	RBFOX2	Granule cells
0	0.309644	0.785	0.446	0	1	KCNT2	Granule cells
0	0.308616	0.339	0.142	0	1	B4GALNT3	Granule cells
0	0.308464	0.361	0.18	0	1	LINC02389	Granule cells
0	0.308268	0.537	0.277	0	1	FAM117B	Granule cells
0	0.307911	0.797	0.565	0	1	KIAA1328	Granule cells
0	0.307885	0.963	0.766	0	1	TTC3	Granule cells
0	0.307236	0.442	0.168	0	1	MIR124-2HG	Granule cells
0	0.307073	0.653	0.443	0	1	HSPA12A	Granule cells
0	0.306444	0.683	0.375	0	1	SYT16	Granule cells
0	0.306408	0.77	0.487	0	1	UNC80	Granule cells
0	0.306358	0.69	0.458	0	1	FAM85B	Granule cells
0	0.306227	0.714	0.463	0	1	ADAM23	Granule cells
0	0.305521	0.424	0.217	0	1	PRAG1	Granule cells
0	0.304996	0.531	0.234	0	1	ZFR2	Granule cells
0	0.304505	0.744	0.355	0	1	PLPPR4	Granule cells
0	0.304101	0.367	0.164	0	1	WSCD2	Granule cells
0	0.302653	0.423	0.18	0	1	ANKRD34C-AS1	Granule cells
0	0.30211	0.337	0.141	0	1	CCNT2-AS1	Granule cells
0	0.30199	0.578	0.294	0	1	DPY19L2	Granule cells
0	0.301084	0.746	0.478	0	1	ICA1L	Granule cells
0	0.300847	0.979	0.8	0	1	ADGRL3	Granule cells
0	0.300573	0.89	0.673	0	1	IGF1R	Granule cells
0	0.299708	0.98	0.902	0	1	FTX	Granule cells
0	0.299217	0.464	0.2	0	1	SYT7	Granule cells
0	0.298855	0.681	0.357	0	1	BRINP3	Granule cells
0	0.297895	0.548	0.298	0	1	PRICKLE1	Granule cells
0	0.296951	0.537	0.263	0	1	TRMT9B	Granule cells
0	0.296018	0.399	0.14	0	1	NRSN1	Granule cells
0	0.295614	0.992	0.784	0	1	NRG3	Granule cells
0	0.295406	0.875	0.65	0	1	PHF14	Granule cells
0	0.294181	0.684	0.413	0	1	FAM13A	Granule cells
0	0.294072	0.817	0.568	0	1	AEBP2	Granule cells
0	0.29314	0.674	0.424	0	1	MEF2C-AS1	Granule cells
0	0.292227	0.637	0.362	0	1	MPP6	Granule cells
0	0.291767	0.575	0.343	0	1	FP700111.1	Granule cells
0	0.291743	0.471	0.225	0	1	ANO3	Granule cells
0	0.291571	0.56	0.317	0	1	TCAIM	Granule cells
0	0.290501	0.859	0.581	0	1	CDH2	Granule cells
0	0.289823	0.91	0.624	0	1	RTN1	Granule cells
0	0.289649	0.48	0.249	0	1	HDX	Granule cells
0	0.289626	0.475	0.227	0	1	LINC00937	Granule cells
0	0.288532	0.612	0.36	0	1	MCU	Granule cells
0	0.287547	0.728	0.447	0	1	FHOD3	Granule cells
0	0.286921	0.302	0.106	0	1	AL033504.1	Granule cells
0	0.28672	0.808	0.518	0	1	SPTAN1	Granule cells
0	0.286402	0.328	0.155	0	1	DLEU7	Granule cells
0	0.286363	0.821	0.555	0	1	OSBPL8	Granule cells
0	0.285752	0.441	0.163	0	1	SYT4	Granule cells
0	0.285508	0.884	0.586	0	1	LINC00461	Granule cells
0	0.284979	0.324	0.157	0	1	CBLN2	Granule cells
0	0.284655	0.642	0.365	0	1	LMO7	Granule cells
0	0.284196	0.863	0.588	0	1	PCNX2	Granule cells
0	0.283124	0.385	0.186	0	1	TRPC5	Granule cells
0	0.282905	0.754	0.518	0	1	DMXL2	Granule cells
0	0.282872	0.604	0.313	0	1	REEP1	Granule cells
0	0.281323	0.42	0.205	0	1	SIDT1	Granule cells
0	0.281318	0.565	0.283	0	1	RGS7BP	Granule cells
0	0.281298	0.935	0.55	0	1	DSCAM	Granule cells
0	0.280962	0.616	0.339	0	1	SLC16A7	Granule cells
0	0.28093	0.61	0.335	0	1	ITPR1	Granule cells
0	0.280807	0.676	0.442	0	1	CDH11	Granule cells
0	0.280618	0.55	0.286	0	1	MAP6	Granule cells
0	0.278831	0.996	0.898	0	1	TCF4	Granule cells
0	0.278807	0.537	0.275	0	1	JAKMIP1	Granule cells
0	0.278764	0.56	0.325	0	1	GRIK5	Granule cells
0	0.278517	0.889	0.595	0	1	CADPS	Granule cells
0	0.276154	0.419	0.198	0	1	LRP8	Granule cells
0	0.275217	0.253	0.096	0	1	COL24A1	Granule cells
0	0.275154	0.405	0.145	0	1	TRIM36	Granule cells
0	0.274506	0.875	0.65	0	1	HECTD4	Granule cells
0	0.274004	0.642	0.377	0	1	LRRC49	Granule cells
0	0.273962	0.593	0.282	0	1	ATCAY	Granule cells
0	0.27339	0.54	0.275	0	1	ZDBF2	Granule cells
0	0.273341	0.964	0.782	0	1	DMD	Granule cells
0	0.273229	0.457	0.211	0	1	FAXC	Granule cells
0	0.272804	0.787	0.469	0	1	DAPK1	Granule cells
0	0.272769	0.511	0.241	0	1	GNB5	Granule cells
0	0.272543	0.401	0.181	0	1	HUNK	Granule cells
0	0.269953	0.448	0.257	0	1	AJAP1	Granule cells
0	0.269735	0.34	0.147	0	1	VAT1L	Granule cells
0	0.268833	0.675	0.45	0	1	PPM1L	Granule cells
0	0.268231	0.459	0.212	0	1	IQSEC3	Granule cells
0	0.268202	0.759	0.457	0	1	SYT14	Granule cells
0	0.267386	0.277	0.076	0	1	AC069437.1	Granule cells
0	0.266987	0.263	0.07	0	1	GRB14	Granule cells
0	0.266745	0.4	0.21	0	1	COL26A1	Granule cells
0	0.266422	0.794	0.55	0	1	PPM1E	Granule cells
0	0.266404	0.998	0.926	0	1	DLG2	Granule cells
0	0.266332	0.509	0.157	0	1	CNR1	Granule cells
0	0.266237	0.324	0.123	0	1	SAMD5	Granule cells
0	0.266102	0.429	0.23	0	1	SEMA5B	Granule cells
0	0.265622	0.692	0.458	0	1	LRRTM3	Granule cells
0	0.265093	0.424	0.186	0	1	PWRN1	Granule cells
0	0.26396	0.279	0.096	0	1	NKAIN1	Granule cells
0	0.26283	0.993	0.901	0	1	CADM2	Granule cells
0	0.262781	0.399	0.198	0	1	ZNF804B	Granule cells
0	0.262629	0.482	0.213	0	1	JPH3	Granule cells
0	0.260724	0.952	0.746	0	1	SMYD3	Granule cells
0	0.2581	0.557	0.337	0	1	LIPE-AS1	Granule cells
0	0.257124	0.726	0.461	0	1	KIAA0825	Granule cells
0	0.256828	0.644	0.394	0	1	EML5	Granule cells
0	0.256407	0.661	0.42	0	1	CDKL5	Granule cells
0	0.255774	0.481	0.261	0	1	FBXO16	Granule cells
0	0.255609	0.335	0.135	0	1	AC087280.2	Granule cells
0	0.255593	0.749	0.451	0	1	RAPGEF4	Granule cells
0	0.254998	0.689	0.454	0	1	PARP8	Granule cells
0	0.253523	0.725	0.5	0	1	TBC1D32	Granule cells
0	0.25331	0.7	0.389	0	1	UNC5D	Granule cells
0	0.253119	0.272	0.127	0	1	GPR161	Granule cells
0	0.252703	0.498	0.233	0	1	C14orf132	Granule cells
0	0.252289	0.371	0.16	0	1	MGAT5B	Granule cells
0	0.251957	0.901	0.666	0	1	MICAL3	Granule cells
0	0.251388	0.941	0.719	0	1	SGIP1	Granule cells
0	0.25096	0.726	0.479	0	1	FAM19A5	Granule cells
0	0.25092	0.604	0.322	0	1	LINGO1	Granule cells
0	0.250791	0.791	0.521	0	1	CSMD2	Granule cells
0	0.250059	0.682	0.427	0	1	RNF24	Granule cells
0	0.250015	0.515	0.258	0	1	CHD5	Granule cells
6.41369e-308	0.328539	0.605	0.42	2.15102e-303	1	BRINP1	Granule cells
2.37733e-305	0.253193	0.474	0.285	7.9731e-301	1	BRINP2	Granule cells
1.19529e-302	0.33452	0.512	0.315	4.00875e-298	1	TMEM132D	Granule cells
5.73494e-297	0.271759	0.604	0.414	1.92338e-292	1	MYRIP	Granule cells
1.91469e-295	0.33603	0.327	0.175	6.4215e-291	1	RPL24	Granule cells
5.69091e-295	0.269879	0.782	0.543	1.90862e-290	1	ZFPM2	Granule cells
3.36579e-292	0.325892	0.44	0.253	1.12882e-287	1	SORCS1	Granule cells
3.96695e-291	0.535984	0.449	0.279	1.33043e-286	1	RPS24	Granule cells
8.4478e-288	0.304768	0.763	0.582	2.83322e-283	1	CAMK1D	Granule cells
6.05546e-287	0.337337	0.657	0.492	2.03088e-282	1	DYNC1I1	Granule cells
9.62958e-285	0.26771	0.387	0.217	3.22957e-280	1	SPRY4-AS1	Granule cells
9.26697e-284	0.281129	0.782	0.618	3.10796e-279	1	ANKRD36	Granule cells
2.49201e-279	0.305372	0.459	0.284	8.3577e-275	1	DPYSL3	Granule cells
4.83804e-276	0.277158	0.776	0.592	1.62258e-271	1	TTTY14	Granule cells
5.83277e-267	0.288703	0.481	0.306	1.95619e-262	1	CEP128	Granule cells
2.42985e-265	0.311721	0.957	0.798	8.14921e-261	1	CADM1	Granule cells
3.15472e-262	0.395147	0.286	0.151	1.05803e-257	1	RPL26	Granule cells
6.79017e-261	0.363312	0.673	0.487	2.27729e-256	1	KCNQ1OT1	Granule cells
2.90385e-259	0.291782	0.711	0.506	9.73892e-255	1	KLF12	Granule cells
4.70488e-252	0.334771	0.558	0.387	1.57792e-247	1	RPL37A	Granule cells
1.66819e-251	0.260331	0.602	0.41	5.59476e-247	1	THSD7A	Granule cells
6.13273e-250	0.30393	0.397	0.241	2.05679e-245	1	RPL19	Granule cells
7.17635e-250	0.25506	0.688	0.516	2.4068e-245	1	NIN	Granule cells
3.76769e-242	0.312781	0.564	0.369	1.26361e-237	1	CDH18	Granule cells
8.55337e-242	0.508948	0.394	0.247	2.86863e-237	1	RPL32	Granule cells
2.49425e-238	0.295039	0.558	0.373	8.36523e-234	1	RYR3	Granule cells
6.81409e-238	0.33082	0.289	0.157	2.28531e-233	1	RPS4X	Granule cells
1.20263e-237	0.263177	0.464	0.289	4.0334e-233	1	TOX	Granule cells
2.28439e-235	0.262841	0.946	0.779	7.66138e-231	1	MYCBP2	Granule cells
1.95747e-230	0.256234	0.369	0.223	6.56496e-226	1	RPL6	Granule cells
1.21253e-225	0.256312	0.364	0.22	4.06659e-221	1	NACA	Granule cells
6.51293e-219	0.254467	0.316	0.178	2.1843e-214	1	MSC-AS1	Granule cells
6.36059e-215	0.267493	0.626	0.446	2.13321e-210	1	FLRT2	Granule cells
1.97559e-184	0.254638	0.373	0.242	6.62573e-180	1	RPS8	Granule cells
4.40931e-176	0.39327	0.965	0.86	1.47879e-171	1	MIR99AHG	Granule cells
8.82285e-176	0.404655	0.36	0.238	2.95901e-171	1	RPS18	Granule cells
5.93733e-169	0.250133	0.342	0.219	1.99126e-164	1	RPS27A	Granule cells
3.45975e-158	0.285678	0.293	0.174	1.16033e-153	1	PCDH11Y	Granule cells
2.16884e-153	0.337999	0.347	0.233	7.27386e-149	1	RPL11	Granule cells
8.27678e-147	0.336318	0.731	0.574	2.77587e-142	1	ZNF704	Granule cells
2.16517e-145	0.305701	0.694	0.67	7.26154e-141	1	LARGE1	Granule cells
5.63885e-133	0.401768	0.585	0.469	1.89116e-128	1	SLC24A3	Granule cells
1.87244e-102	0.546182	0.484	0.384	6.27979e-98	1	AL589740.1	Granule cells
1.40795e-85	0.458508	0.556	0.475	4.72198e-81	1	FIGN	Granule cells
6.42199e-71	0.478322	0.441	0.364	2.15381e-66	1	SHISA6	Granule cells
3.4539e-66	0.28612	0.402	0.298	1.15837e-61	1	TSHZ2	Granule cells
0	1.76787	0.993	0.48	0	2	CTNNA3	Oligodendrocytes
0	1.75636	0.958	0.319	0	2	PLP1	Oligodendrocytes
0	1.70774	0.982	0.39	0	2	ST18	Oligodendrocytes
0	1.65501	0.982	0.394	0	2	RNF220	Oligodendrocytes
0	1.62331	0.991	0.553	0	2	MBP	Oligodendrocytes
0	1.62073	0.899	0.243	0	2	MOBP	Oligodendrocytes
0	1.5877	0.957	0.345	0	2	TMEM144	Oligodendrocytes
0	1.55585	0.986	0.577	0	2	PIP4K2A	Oligodendrocytes
0	1.54793	0.884	0.304	0	2	AC026316.5	Oligodendrocytes
0	1.49769	0.85	0.24	0	2	CERCAM	Oligodendrocytes
0	1.4797	0.895	0.281	0	2	TF	Oligodendrocytes
0	1.44699	0.959	0.581	0	2	MAN2A1	Oligodendrocytes
0	1.44008	0.711	0.157	0	2	LINC01608	Oligodendrocytes
0	1.43279	0.985	0.7	0	2	SLC44A1	Oligodendrocytes
0	1.43004	0.906	0.29	0	2	C10orf90	Oligodendrocytes
0	1.42551	0.942	0.377	0	2	DOCK5	Oligodendrocytes
0	1.40741	0.873	0.243	0	2	ENPP2	Oligodendrocytes
0	1.39465	0.916	0.434	0	2	PDE1C	Oligodendrocytes
0	1.39163	0.89	0.323	0	2	CLMN	Oligodendrocytes
0	1.38075	0.881	0.342	0	2	PLEKHH1	Oligodendrocytes
0	1.38032	0.983	0.639	0	2	SLC24A2	Oligodendrocytes
0	1.36772	0.934	0.525	0	2	TMEM165	Oligodendrocytes
0	1.36025	0.622	0.159	0	2	SLC5A11	Oligodendrocytes
0	1.33009	0.937	0.55	0	2	PRUNE2	Oligodendrocytes
0	1.32347	0.774	0.182	0	2	SLCO1A2	Oligodendrocytes
0	1.32077	0.96	0.68	0	2	TTLL7	Oligodendrocytes
0	1.32036	0.959	0.599	0	2	UNC5C	Oligodendrocytes
0	1.31059	0.742	0.337	0	2	PALM2	Oligodendrocytes
0	1.30508	0.997	0.766	0	2	IL1RAPL1	Oligodendrocytes
0	1.30281	0.849	0.341	0	2	KCNH8	Oligodendrocytes
0	1.30163	0.771	0.165	0	2	MOG	Oligodendrocytes
0	1.28565	0.964	0.586	0	2	TMTC2	Oligodendrocytes
0	1.28528	0.868	0.374	0	2	CREB5	Oligodendrocytes
0	1.28247	0.62	0.201	0	2	LINC01170	Oligodendrocytes
0	1.26811	0.722	0.217	0	2	CNP	Oligodendrocytes
0	1.26532	0.968	0.7	0	2	PHLPP1	Oligodendrocytes
0	1.26414	0.878	0.414	0	2	ABCA2	Oligodendrocytes
0	1.2511	0.948	0.592	0	2	PLCL1	Oligodendrocytes
0	1.24972	0.883	0.536	0	2	KLHL32	Oligodendrocytes
0	1.24709	0.76	0.2	0	2	UGT8	Oligodendrocytes
0	1.24146	0.675	0.158	0	2	LINC00639	Oligodendrocytes
0	1.2379	0.779	0.295	0	2	CLDND1	Oligodendrocytes
0	1.23486	0.748	0.249	0	2	PCSK6	Oligodendrocytes
0	1.23044	0.723	0.225	0	2	HHIP	Oligodendrocytes
0	1.22431	0.971	0.583	0	2	ELMO1	Oligodendrocytes
0	1.21086	0.741	0.209	0	2	CNTN2	Oligodendrocytes
0	1.20759	0.795	0.402	0	2	POLR2F	Oligodendrocytes
0	1.20203	0.932	0.509	0	2	FRMD4B	Oligodendrocytes
0	1.19743	0.729	0.186	0	2	FA2H	Oligodendrocytes
0	1.19148	0.833	0.421	0	2	CNTNAP4	Oligodendrocytes
0	1.19109	0.679	0.145	0	2	FOLH1	Oligodendrocytes
0	1.19087	0.742	0.181	0	2	MYRF	Oligodendrocytes
0	1.19035	0.945	0.64	0	2	SHTN1	Oligodendrocytes
0	1.18617	0.69	0.329	0	2	HDAC2-AS2	Oligodendrocytes
0	1.18477	0.986	0.858	0	2	SIK3	Oligodendrocytes
0	1.18288	0.73	0.18	0	2	ABCA8	Oligodendrocytes
0	1.18047	0.978	0.719	0	2	FRMD5	Oligodendrocytes
0	1.17536	0.823	0.473	0	2	PXK	Oligodendrocytes
0	1.16969	0.668	0.234	0	2	LINC00320	Oligodendrocytes
0	1.16919	0.756	0.283	0	2	LPAR1	Oligodendrocytes
0	1.16809	0.651	0.167	0	2	PIEZO2	Oligodendrocytes
0	1.1676	0.626	0.147	0	2	CNDP1	Oligodendrocytes
0	1.16274	0.891	0.5	0	2	GAB1	Oligodendrocytes
0	1.1614	0.782	0.239	0	2	BCAS1	Oligodendrocytes
0	1.16019	0.73	0.227	0	2	SHROOM4	Oligodendrocytes
0	1.15808	0.776	0.348	0	2	FAM107B	Oligodendrocytes
0	1.15529	0.535	0.113	0	2	AC090502.1	Oligodendrocytes
0	1.15344	0.778	0.294	0	2	COL4A5	Oligodendrocytes
0	1.14858	0.7	0.209	0	2	CDK18	Oligodendrocytes
0	1.14433	0.927	0.6	0	2	ARAP2	Oligodendrocytes
0	1.1433	0.859	0.567	0	2	SLAIN1	Oligodendrocytes
0	1.14184	0.711	0.264	0	2	VRK2	Oligodendrocytes
0	1.13955	0.937	0.716	0	2	FRYL	Oligodendrocytes
0	1.13508	0.559	0.193	0	2	AC012593.1	Oligodendrocytes
0	1.13338	0.653	0.237	0	2	KIF6	Oligodendrocytes
0	1.12893	0.752	0.305	0	2	SYNJ2	Oligodendrocytes
0	1.12125	0.915	0.441	0	2	ZNF536	Oligodendrocytes
0	1.1208	0.789	0.464	0	2	KCNMB4	Oligodendrocytes
0	1.11768	0.939	0.528	0	2	SPOCK3	Oligodendrocytes
0	1.11123	0.971	0.627	0	2	EDIL3	Oligodendrocytes
0	1.10885	0.699	0.36	0	2	QDPR	Oligodendrocytes
0	1.10833	0.916	0.702	0	2	FUT8	Oligodendrocytes
0	1.10592	0.569	0.14	0	2	AL359091.1	Oligodendrocytes
0	1.10403	0.646	0.232	0	2	SCD	Oligodendrocytes
0	1.10367	0.989	0.819	0	2	PDE4B	Oligodendrocytes
0	1.09791	0.897	0.576	0	2	PDE8A	Oligodendrocytes
0	1.0947	0.801	0.531	0	2	LPGAT1	Oligodendrocytes
0	1.09278	0.652	0.179	0	2	ANLN	Oligodendrocytes
0	1.08806	0.955	0.66	0	2	MAP7	Oligodendrocytes
0	1.08581	0.784	0.291	0	2	DAAM2	Oligodendrocytes
0	1.07765	0.604	0.17	0	2	HAPLN2	Oligodendrocytes
0	1.07005	0.602	0.136	0	2	CARNS1	Oligodendrocytes
0	1.06776	0.613	0.242	0	2	HS3ST5	Oligodendrocytes
0	1.06746	0.904	0.627	0	2	DNAJC6	Oligodendrocytes
0	1.06468	0.76	0.353	0	2	PHLDB1	Oligodendrocytes
0	1.05723	0.964	0.638	0	2	DOCK10	Oligodendrocytes
0	1.05481	0.954	0.724	0	2	ERBIN	Oligodendrocytes
0	1.05316	0.691	0.222	0	2	ATP10B	Oligodendrocytes
0	1.04616	0.552	0.142	0	2	LRP2	Oligodendrocytes
0	1.04579	0.911	0.708	0	2	SEPT7	Oligodendrocytes
0	1.04564	0.994	0.89	0	2	QKI	Oligodendrocytes
0	1.04422	0.71	0.335	0	2	AATK	Oligodendrocytes
0	1.03988	0.701	0.33	0	2	AMER2	Oligodendrocytes
0	1.0395	0.736	0.337	0	2	LINC00609	Oligodendrocytes
0	1.03057	0.588	0.131	0	2	CD22	Oligodendrocytes
0	1.02737	0.504	0.153	0	2	LINC01630	Oligodendrocytes
0	1.02635	0.741	0.401	0	2	LAMP2	Oligodendrocytes
0	1.02379	0.56	0.122	0	2	SH3TC2	Oligodendrocytes
0	1.02188	0.863	0.631	0	2	CDK19	Oligodendrocytes
0	1.02068	0.875	0.613	0	2	SGK1	Oligodendrocytes
0	1.01713	0.944	0.766	0	2	TRIM2	Oligodendrocytes
0	1.01671	0.928	0.649	0	2	NCKAP5	Oligodendrocytes
0	1.01408	0.784	0.47	0	2	GRM3	Oligodendrocytes
0	1.00975	0.86	0.576	0	2	SH3GL3	Oligodendrocytes
0	1.00528	0.916	0.746	0	2	DLG1	Oligodendrocytes
0	0.999001	0.735	0.456	0	2	LANCL1	Oligodendrocytes
0	0.996377	0.967	0.716	0	2	2023-03-01	Oligodendrocytes
0	0.991672	0.806	0.502	0	2	ANO4	Oligodendrocytes
0	0.984174	0.786	0.427	0	2	DLC1	Oligodendrocytes
0	0.980147	0.52	0.124	0	2	ASPA	Oligodendrocytes
0	0.979679	0.547	0.138	0	2	LDB3	Oligodendrocytes
0	0.978037	0.968	0.775	0	2	DNM3	Oligodendrocytes
0	0.969274	0.777	0.473	0	2	MYO1D	Oligodendrocytes
0	0.967631	0.693	0.321	0	2	PLD1	Oligodendrocytes
0	0.964299	0.434	0.087	0	2	OPALIN	Oligodendrocytes
0	0.96394	0.658	0.337	0	2	COLGALT2	Oligodendrocytes
0	0.954658	0.934	0.639	0	2	PEX5L	Oligodendrocytes
0	0.952439	0.572	0.158	0	2	PLLP	Oligodendrocytes
0	0.950334	0.537	0.116	0	2	MAG	Oligodendrocytes
0	0.949841	0.695	0.407	0	2	ADIPOR2	Oligodendrocytes
0	0.943419	0.754	0.319	0	2	PTGDS	Oligodendrocytes
0	0.943192	0.742	0.342	0	2	FGFR2	Oligodendrocytes
0	0.941497	1	0.936	0	2	PCDH9	Oligodendrocytes
0	0.935111	0.53	0.164	0	2	ITGA2	Oligodendrocytes
0	0.934632	0.551	0.198	0	2	EFHD1	Oligodendrocytes
0	0.933899	0.882	0.676	0	2	OTUD7A	Oligodendrocytes
0	0.933474	0.771	0.486	0	2	MTUS1	Oligodendrocytes
0	0.933211	0.949	0.702	0	2	PTPRK	Oligodendrocytes
0	0.93006	0.644	0.353	0	2	APLP1	Oligodendrocytes
0	0.93001	0.927	0.668	0	2	SPOCK1	Oligodendrocytes
0	0.925083	0.496	0.108	0	2	AC016597.1	Oligodendrocytes
0	0.907694	0.498	0.119	0	2	MAL	Oligodendrocytes
0	0.906462	0.521	0.161	0	2	CDH19	Oligodendrocytes
0	0.905866	0.44	0.166	0	2	DYSF	Oligodendrocytes
0	0.89993	0.726	0.365	0	2	GSN	Oligodendrocytes
0	0.899799	0.918	0.765	0	2	DIP2B	Oligodendrocytes
0	0.898828	0.744	0.493	0	2	PSEN1	Oligodendrocytes
0	0.896944	0.495	0.106	0	2	NKX6-2	Oligodendrocytes
0	0.896395	0.913	0.681	0	2	ATP8A1	Oligodendrocytes
0	0.893638	0.557	0.209	0	2	PRR5L	Oligodendrocytes
0	0.892764	0.796	0.478	0	2	SH3D19	Oligodendrocytes
0	0.891587	0.703	0.385	0	2	GPRC5B	Oligodendrocytes
0	0.888915	0.562	0.181	0	2	SEMA3B	Oligodendrocytes
0	0.888862	0.796	0.568	0	2	HIPK2	Oligodendrocytes
0	0.887034	0.792	0.52	0	2	USP54	Oligodendrocytes
0	0.886476	0.822	0.466	0	2	DOCK1	Oligodendrocytes
0	0.88202	0.35	0.121	0	2	AL354809.1	Oligodendrocytes
0	0.881894	0.697	0.475	0	2	RYBP	Oligodendrocytes
0	0.880729	0.558	0.192	0	2	TMEM63A	Oligodendrocytes
0	0.880194	0.66	0.41	0	2	C1QTNF3-AMACR	Oligodendrocytes
0	0.8749	0.558	0.208	0	2	TTYH2	Oligodendrocytes
0	0.874842	0.834	0.582	0	2	SLCO3A1	Oligodendrocytes
0	0.873414	0.411	0.139	0	2	LINC00877	Oligodendrocytes
0	0.873004	0.992	0.882	0	2	PPP2R2B	Oligodendrocytes
0	0.871232	0.636	0.392	0	2	FAM13C	Oligodendrocytes
0	0.870614	0.69	0.446	0	2	MIR181A1HG	Oligodendrocytes
0	0.868379	0.681	0.42	0	2	ATG4C	Oligodendrocytes
0	0.864087	0.802	0.537	0	2	COBL	Oligodendrocytes
0	0.861287	0.644	0.408	0	2	SRCIN1	Oligodendrocytes
0	0.860035	0.545	0.264	0	2	TMTC4	Oligodendrocytes
0	0.859374	0.785	0.471	0	2	HIP1	Oligodendrocytes
0	0.85296	0.601	0.336	0	2	NT5DC1	Oligodendrocytes
0	0.851086	0.466	0.136	0	2	GPR37	Oligodendrocytes
0	0.851	0.855	0.601	0	2	ALCAM	Oligodendrocytes
0	0.849653	0.685	0.433	0	2	KIF13B	Oligodendrocytes
0	0.84445	0.647	0.302	0	2	MEGF10	Oligodendrocytes
0	0.842351	0.575	0.254	0	2	PLA2G16	Oligodendrocytes
0	0.839036	0.608	0.381	0	2	CCP110	Oligodendrocytes
0	0.837968	0.872	0.651	0	2	APBB2	Oligodendrocytes
0	0.835919	0.652	0.425	0	2	SEMA4D	Oligodendrocytes
0	0.834192	0.534	0.261	0	2	FAM124A	Oligodendrocytes
0	0.834029	0.646	0.381	0	2	MOB3B	Oligodendrocytes
0	0.829861	0.829	0.661	0	2	NFASC	Oligodendrocytes
0	0.828912	0.49	0.269	0	2	AC006059.1	Oligodendrocytes
0	0.828576	0.65	0.32	0	2	RFTN2	Oligodendrocytes
0	0.816822	0.848	0.718	0	2	MAP4K5	Oligodendrocytes
0	0.816421	0.961	0.86	0	2	TCF12	Oligodendrocytes
0	0.815071	0.438	0.123	0	2	TP53TG5	Oligodendrocytes
0	0.813616	0.565	0.276	0	2	ARHGAP23	Oligodendrocytes
0	0.811451	0.641	0.389	0	2	PPP1R16B	Oligodendrocytes
0	0.809223	0.537	0.335	0	2	DPYSL5	Oligodendrocytes
0	0.806645	0.941	0.796	0	2	GPM6B	Oligodendrocytes
0	0.799209	0.455	0.152	0	2	RHOU	Oligodendrocytes
0	0.798484	0.46	0.243	0	2	CPB2-AS1	Oligodendrocytes
0	0.797088	0.965	0.864	0	2	CLASP2	Oligodendrocytes
0	0.795618	0.834	0.672	0	2	PKP4	Oligodendrocytes
0	0.795327	0.469	0.166	0	2	NDE1	Oligodendrocytes
0	0.795278	0.392	0.117	0	2	ADAMTS18	Oligodendrocytes
0	0.795134	0.744	0.605	0	2	ZFYVE16	Oligodendrocytes
0	0.795035	0.691	0.461	0	2	IQGAP1	Oligodendrocytes
0	0.794809	0.37	0.083	0	2	AC009063.2	Oligodendrocytes
0	0.793111	0.919	0.814	0	2	CCDC88A	Oligodendrocytes
0	0.791531	0.764	0.616	0	2	AGTPBP1	Oligodendrocytes
0	0.789959	0.424	0.168	0	2	FAM95C	Oligodendrocytes
0	0.7899	0.658	0.272	0	2	GLDN	Oligodendrocytes
0	0.788437	0.411	0.107	0	2	AC110285.1	Oligodendrocytes
0	0.787432	0.54	0.312	0	2	YPEL2	Oligodendrocytes
0	0.78682	0.481	0.198	0	2	LAMA2	Oligodendrocytes
0	0.783996	0.704	0.498	0	2	PPM1H	Oligodendrocytes
0	0.783528	0.582	0.319	0	2	ENOSF1	Oligodendrocytes
0	0.782942	0.557	0.312	0	2	SUN2	Oligodendrocytes
0	0.777857	0.405	0.083	0	2	HPN-AS1	Oligodendrocytes
0	0.775984	0.83	0.593	0	2	TMEFF2	Oligodendrocytes
0	0.774499	0.687	0.491	0	2	JAM3	Oligodendrocytes
0	0.771096	0.585	0.312	0	2	LRRC1	Oligodendrocytes
0	0.768503	0.476	0.254	0	2	KLHL4	Oligodendrocytes
0	0.768239	0.463	0.168	0	2	SEPT4	Oligodendrocytes
0	0.764577	0.92	0.811	0	2	MAP4K4	Oligodendrocytes
0	0.763033	0.489	0.177	0	2	CPM	Oligodendrocytes
0	0.762399	0.38	0.076	0	2	TMEM235	Oligodendrocytes
0	0.759639	0.954	0.81	0	2	AGAP1	Oligodendrocytes
0	0.759614	0.437	0.141	0	2	RASGRP3	Oligodendrocytes
0	0.758835	0.589	0.373	0	2	GNAI1	Oligodendrocytes
0	0.75681	0.569	0.375	0	2	KIAA1324L	Oligodendrocytes
0	0.755715	0.917	0.831	0	2	ARHGAP21	Oligodendrocytes
0	0.753774	0.575	0.253	0	2	ZCCHC24	Oligodendrocytes
0	0.753442	0.404	0.174	0	2	NINJ2	Oligodendrocytes
0	0.752819	0.938	0.725	0	2	DPYD	Oligodendrocytes
0	0.74804	0.61	0.416	0	2	SLC22A15	Oligodendrocytes
0	0.746314	0.596	0.511	0	2	ZDHHC20	Oligodendrocytes
0	0.742964	0.471	0.245	0	2	CPOX	Oligodendrocytes
0	0.740768	0.386	0.148	0	2	ANKRD18A	Oligodendrocytes
0	0.740311	0.894	0.77	0	2	TJP1	Oligodendrocytes
0	0.734404	0.546	0.335	0	2	RAB40B	Oligodendrocytes
0	0.733748	0.425	0.177	0	2	AC096564.1	Oligodendrocytes
0	0.731127	0.79	0.671	0	2	TULP4	Oligodendrocytes
0	0.729334	0.522	0.258	0	2	NDRG1	Oligodendrocytes
0	0.728653	0.965	0.708	0	2	NKAIN2	Oligodendrocytes
0	0.726001	0.702	0.579	0	2	MVB12B	Oligodendrocytes
0	0.725964	0.934	0.802	0	2	ZEB2	Oligodendrocytes
0	0.724905	0.429	0.18	0	2	ZDHHC9	Oligodendrocytes
0	0.72192	0.57	0.383	0	2	SLC12A2	Oligodendrocytes
0	0.720768	0.438	0.272	0	2	PALM2-AKAP2	Oligodendrocytes
0	0.71953	0.617	0.368	0	2	EVA1C	Oligodendrocytes
0	0.719262	0.543	0.36	0	2	DUBR	Oligodendrocytes
0	0.718346	0.819	0.714	0	2	PTBP2	Oligodendrocytes
0	0.71671	0.511	0.305	0	2	PIK3C2B	Oligodendrocytes
0	0.71659	0.852	0.593	0	2	AK5	Oligodendrocytes
0	0.716099	0.648	0.468	0	2	LMCD1-AS1	Oligodendrocytes
0	0.716073	0.658	0.485	0	2	RETREG1	Oligodendrocytes
0	0.715674	0.911	0.71	0	2	LIMCH1	Oligodendrocytes
0	0.715116	0.48	0.237	0	2	FAXDC2	Oligodendrocytes
0	0.712279	0.648	0.41	0	2	SEMA6A	Oligodendrocytes
0	0.710433	0.955	0.881	0	2	FMNL2	Oligodendrocytes
0	0.709366	0.456	0.163	0	2	KIAA1755	Oligodendrocytes
0	0.708454	0.351	0.1	0	2	LGR5	Oligodendrocytes
0	0.707466	0.66	0.448	0	2	BIN1	Oligodendrocytes
0	0.707184	0.361	0.132	0	2	CA2	Oligodendrocytes
0	0.706133	0.465	0.243	0	2	DEPTOR	Oligodendrocytes
0	0.703078	0.829	0.627	0	2	MT-ND2	Oligodendrocytes
0	0.701345	0.836	0.673	0	2	FNBP1	Oligodendrocytes
0	0.696828	0.793	0.581	0	2	DSCAML1	Oligodendrocytes
0	0.69661	0.798	0.658	0	2	MYO6	Oligodendrocytes
0	0.694717	0.866	0.579	0	2	KIRREL3	Oligodendrocytes
0	0.692754	0.372	0.107	0	2	AC084032.1	Oligodendrocytes
0	0.690796	0.381	0.121	0	2	DAPK2	Oligodendrocytes
0	0.690157	0.839	0.636	0	2	SCD5	Oligodendrocytes
0	0.689343	0.796	0.698	0	2	ANKIB1	Oligodendrocytes
0	0.687859	0.839	0.533	0	2	RAPGEF5	Oligodendrocytes
0	0.685728	0.761	0.681	0	2	GNAO1	Oligodendrocytes
0	0.681516	0.338	0.106	0	2	TMEM98	Oligodendrocytes
0	0.681452	0.837	0.705	0	2	GRID1	Oligodendrocytes
0	0.680395	0.347	0.076	0	2	ERMN	Oligodendrocytes
0	0.67997	0.782	0.636	0	2	SORT1	Oligodendrocytes
0	0.678033	0.352	0.118	0	2	LRRC63	Oligodendrocytes
0	0.677472	0.48	0.28	0	2	C12orf76	Oligodendrocytes
0	0.674958	0.45	0.255	0	2	GREB1L	Oligodendrocytes
0	0.671656	0.367	0.186	0	2	OLMALINC	Oligodendrocytes
0	0.671242	0.757	0.633	0	2	OSBPL1A	Oligodendrocytes
0	0.669524	0.71	0.622	0	2	DICER1	Oligodendrocytes
0	0.669092	0.556	0.339	0	2	P2RX7	Oligodendrocytes
0	0.667867	0.693	0.542	0	2	SGK3	Oligodendrocytes
0	0.666883	0.778	0.573	0	2	DOCK9	Oligodendrocytes
0	0.665698	0.356	0.156	0	2	TMPRSS5	Oligodendrocytes
0	0.664052	0.406	0.155	0	2	PLEKHG3	Oligodendrocytes
0	0.662995	0.673	0.526	0	2	RNF144A	Oligodendrocytes
0	0.66247	0.613	0.496	0	2	TECPR2	Oligodendrocytes
0	0.658833	0.63	0.504	0	2	NCOA7	Oligodendrocytes
0	0.65809	0.336	0.075	0	2	PPP1R14A	Oligodendrocytes
0	0.657266	0.43	0.207	0	2	TFEB	Oligodendrocytes
0	0.656988	0.696	0.572	0	2	SECISBP2L	Oligodendrocytes
0	0.656468	0.984	0.88	0	2	NCAM2	Oligodendrocytes
0	0.656064	0.362	0.125	0	2	RGCC	Oligodendrocytes
0	0.654443	0.482	0.307	0	2	LSS	Oligodendrocytes
0	0.653326	0.801	0.614	0	2	NALCN	Oligodendrocytes
0	0.652941	0.819	0.68	0	2	MBNL2	Oligodendrocytes
0	0.650005	0.367	0.112	0	2	SELENOP	Oligodendrocytes
0	0.649438	0.632	0.335	0	2	MYO1E	Oligodendrocytes
0	0.649177	0.654	0.575	0	2	AGPAT4	Oligodendrocytes
0	0.649108	0.607	0.479	0	2	PACS2	Oligodendrocytes
0	0.645249	0.583	0.426	0	2	SLC25A13	Oligodendrocytes
0	0.645058	0.903	0.848	0	2	ZNF638	Oligodendrocytes
0	0.641969	0.545	0.418	0	2	RAB30	Oligodendrocytes
0	0.641896	0.716	0.596	0	2	RBPJ	Oligodendrocytes
0	0.641079	0.447	0.241	0	2	SYT9	Oligodendrocytes
0	0.640524	0.578	0.485	0	2	ZNF652	Oligodendrocytes
0	0.640036	0.611	0.486	0	2	RDX	Oligodendrocytes
0	0.639499	0.449	0.276	0	2	TPPP	Oligodendrocytes
0	0.637163	0.439	0.273	0	2	ABHD17B	Oligodendrocytes
0	0.635892	0.906	0.84	0	2	EXOC6B	Oligodendrocytes
0	0.63394	0.51	0.337	0	2	FOXN2	Oligodendrocytes
0	0.632521	0.883	0.812	0	2	RTN4	Oligodendrocytes
0	0.631959	0.664	0.554	0	2	SLC22A23	Oligodendrocytes
0	0.63131	0.457	0.298	0	2	NXPE3	Oligodendrocytes
0	0.625275	0.408	0.246	0	2	SEC14L5	Oligodendrocytes
0	0.621535	0.537	0.396	0	2	ZNF708	Oligodendrocytes
0	0.616315	0.594	0.486	0	2	PPP1R21	Oligodendrocytes
0	0.614936	0.992	0.904	0	2	MAGI2	Oligodendrocytes
0	0.614575	0.832	0.702	0	2	ENOX1	Oligodendrocytes
0	0.610337	0.584	0.451	0	2	CPEB2	Oligodendrocytes
0	0.609306	0.675	0.571	0	2	RNF13	Oligodendrocytes
0	0.608043	0.512	0.324	0	2	NPC1	Oligodendrocytes
0	0.604122	0.422	0.207	0	2	FGF1	Oligodendrocytes
0	0.60321	0.715	0.57	0	2	SLC39A11	Oligodendrocytes
0	0.602277	0.87	0.659	0	2	MT-CYB	Oligodendrocytes
0	0.601868	0.889	0.814	0	2	DIP2C	Oligodendrocytes
0	0.601304	0.554	0.38	0	2	CPQ	Oligodendrocytes
0	0.599225	0.686	0.558	0	2	CDC14B	Oligodendrocytes
0	0.596222	0.533	0.426	0	2	HBS1L	Oligodendrocytes
0	0.593393	0.66	0.563	0	2	BBX	Oligodendrocytes
0	0.591444	0.619	0.489	0	2	ACER3	Oligodendrocytes
0	0.588955	0.65	0.422	0	2	KANK1	Oligodendrocytes
0	0.588497	0.468	0.311	0	2	CUEDC1	Oligodendrocytes
0	0.5881	0.636	0.522	0	2	IGSF11	Oligodendrocytes
0	0.587865	0.448	0.264	0	2	FAM102A	Oligodendrocytes
0	0.584449	0.67	0.599	0	2	KDM6A	Oligodendrocytes
0	0.583437	0.738	0.621	0	2	PHACTR3	Oligodendrocytes
0	0.582223	0.368	0.196	0	2	AC106869.1	Oligodendrocytes
0	0.581748	0.538	0.373	0	2	OTUD7B	Oligodendrocytes
0	0.581037	0.95	0.847	0	2	NCAM1	Oligodendrocytes
0	0.580184	0.623	0.537	0	2	PPP2R2A	Oligodendrocytes
0	0.58011	0.912	0.687	0	2	MT-CO2	Oligodendrocytes
0	0.578956	0.338	0.157	0	2	AFMID	Oligodendrocytes
0	0.578864	0.325	0.087	0	2	SLC31A2	Oligodendrocytes
0	0.577511	0.481	0.313	0	2	RCAN2	Oligodendrocytes
0	0.576661	0.759	0.594	0	2	KIF13A	Oligodendrocytes
0	0.576546	0.695	0.559	0	2	EPS15	Oligodendrocytes
0	0.575063	0.937	0.857	0	2	PTK2	Oligodendrocytes
0	0.574374	0.728	0.663	0	2	NUTM2A-AS1	Oligodendrocytes
0	0.574196	0.829	0.571	0	2	CDH20	Oligodendrocytes
0	0.571738	0.688	0.612	0	2	ITCH	Oligodendrocytes
0	0.567761	0.609	0.525	0	2	PPM1B	Oligodendrocytes
0	0.567694	0.916	0.811	0	2	AKAP6	Oligodendrocytes
0	0.567693	0.729	0.573	0	2	HECW2	Oligodendrocytes
0	0.565492	0.898	0.811	0	2	CDC42BPA	Oligodendrocytes
0	0.564796	0.349	0.174	0	2	CNKSR3	Oligodendrocytes
0	0.564316	0.416	0.24	0	2	TESK2	Oligodendrocytes
0	0.563679	0.441	0.227	0	2	HEPACAM	Oligodendrocytes
0	0.562432	0.374	0.195	0	2	MEIS1	Oligodendrocytes
0	0.561498	0.646	0.555	0	2	DENND5A	Oligodendrocytes
0	0.560011	0.555	0.308	0	2	CLIC4	Oligodendrocytes
0	0.55889	0.295	0.093	0	2	LGI3	Oligodendrocytes
0	0.558317	0.599	0.525	0	2	ZKSCAN1	Oligodendrocytes
0	0.55027	0.302	0.091	0	2	ERBB3	Oligodendrocytes
0	0.549851	0.327	0.115	0	2	SOX10	Oligodendrocytes
0	0.549068	0.389	0.197	0	2	CPNE2	Oligodendrocytes
0	0.547613	0.739	0.599	0	2	DLEU2	Oligodendrocytes
0	0.54736	0.269	0.076	0	2	BOK	Oligodendrocytes
0	0.543466	0.631	0.387	0	2	PREX1	Oligodendrocytes
0	0.543399	0.832	0.533	0	2	FBXL7	Oligodendrocytes
0	0.542323	0.961	0.766	0	2	ANK3	Oligodendrocytes
0	0.541184	0.653	0.495	0	2	SPATA6	Oligodendrocytes
0	0.540609	0.725	0.646	0	2	NEO1	Oligodendrocytes
0	0.537153	0.309	0.13	0	2	LARP6	Oligodendrocytes
0	0.535468	0.332	0.165	0	2	SLC48A1	Oligodendrocytes
0	0.532785	0.336	0.179	0	2	NEK3	Oligodendrocytes
0	0.525549	0.676	0.619	0	2	ELF2	Oligodendrocytes
0	0.524552	0.731	0.579	0	2	GAB2	Oligodendrocytes
0	0.524056	0.634	0.491	0	2	STARD13	Oligodendrocytes
0	0.523813	0.484	0.324	0	2	HIP1R	Oligodendrocytes
0	0.521245	0.643	0.504	0	2	L3MBTL4	Oligodendrocytes
0	0.520906	0.318	0.127	0	2	TSPAN15	Oligodendrocytes
0	0.518898	0.74	0.576	0	2	ST6GALNAC3	Oligodendrocytes
0	0.518809	0.884	0.675	0	2	MT-ND4	Oligodendrocytes
0	0.518507	0.332	0.16	0	2	CSRP1	Oligodendrocytes
0	0.508092	0.3	0.114	0	2	PLEKHB1	Oligodendrocytes
0	0.507641	0.822	0.751	0	2	C9orf3	Oligodendrocytes
0	0.506171	0.352	0.183	0	2	INF2	Oligodendrocytes
0	0.506017	0.747	0.605	0	2	SAMD12	Oligodendrocytes
0	0.500523	0.813	0.743	0	2	PICALM	Oligodendrocytes
0	0.49979	0.49	0.311	0	2	HTRA1	Oligodendrocytes
0	0.496641	0.353	0.178	0	2	PMP22	Oligodendrocytes
0	0.492039	0.64	0.474	0	2	KAT2B	Oligodendrocytes
0	0.488162	0.985	0.821	0	2	PTPRD	Oligodendrocytes
0	0.483777	0.842	0.788	0	2	FHIT	Oligodendrocytes
0	0.479739	0.256	0.085	0	2	FAM222A	Oligodendrocytes
0	0.477302	0.275	0.108	0	2	OLIG1	Oligodendrocytes
0	0.475242	0.255	0.105	0	2	AMOTL2	Oligodendrocytes
0	0.472818	0.716	0.572	0	2	ARFGEF3	Oligodendrocytes
0	0.46702	0.871	0.637	0	2	MT-ND1	Oligodendrocytes
0	0.456369	0.275	0.103	0	2	RTKN	Oligodendrocytes
0	0.45103	0.813	0.771	0	2	BAZ2B	Oligodendrocytes
0	0.448612	0.888	0.686	0	2	MT-ATP6	Oligodendrocytes
0	0.438205	0.287	0.129	0	2	CD9	Oligodendrocytes
0	0.431708	0.876	0.811	0	2	WWOX	Oligodendrocytes
0	0.430017	0.957	0.912	0	2	DST	Oligodendrocytes
0	0.425551	0.786	0.762	0	2	RNF130	Oligodendrocytes
0	0.417308	0.857	0.797	0	2	APP	Oligodendrocytes
0	0.410288	0.265	0.106	0	2	TMC6	Oligodendrocytes
0	0.399043	0.684	0.546	0	2	ELL2	Oligodendrocytes
0	0.37336	0.93	0.731	0	2	MT-CO1	Oligodendrocytes
0	0.373137	0.965	0.898	0	2	ANK2	Oligodendrocytes
0	0.3562	0.831	0.823	0	2	DDX17	Oligodendrocytes
0	0.349567	0.371	0.172	0	2	PADI2	Oligodendrocytes
0	0.327497	0.891	0.883	0	2	RERE	Oligodendrocytes
0	0.316451	0.937	0.732	0	2	MT-CO3	Oligodendrocytes
0	0.314236	0.838	0.791	0	2	SSH2	Oligodendrocytes
2.80487e-301	0.513062	0.361	0.204	9.40696e-297	2	SREBF1	Oligodendrocytes
2.60434e-300	0.612185	0.536	0.429	8.73445e-296	2	LIPA	Oligodendrocytes
7.76614e-299	0.539707	0.372	0.22	2.60461e-294	2	NIPAL3	Oligodendrocytes
2.79447e-297	0.523695	0.379	0.227	9.37208e-293	2	WHRN	Oligodendrocytes
4.15093e-296	0.569918	0.462	0.33	1.39214e-291	2	ZBED5	Oligodendrocytes
1.33836e-294	0.579823	0.379	0.234	4.4886e-290	2	TMC7	Oligodendrocytes
3.66299e-291	0.516728	0.464	0.3	1.22849e-286	2	WIPF1	Oligodendrocytes
1.46593e-290	0.545022	0.375	0.228	4.91643e-286	2	MOSPD2	Oligodendrocytes
1.61963e-283	0.42202	0.731	0.702	5.4319e-279	2	PPP1R12B	Oligodendrocytes
2.01553e-283	0.421923	0.298	0.149	6.75967e-279	2	RASSF2	Oligodendrocytes
1.28707e-282	0.588727	0.375	0.229	4.31657e-278	2	RHOBTB1	Oligodendrocytes
7.70801e-282	0.530839	0.47	0.302	2.58511e-277	2	PLD5	Oligodendrocytes
4.46893e-280	0.505674	0.316	0.173	1.49879e-275	2	GLTP	Oligodendrocytes
2.11203e-278	0.49805	0.651	0.589	7.08333e-274	2	NLK	Oligodendrocytes
1.74986e-277	0.547016	0.432	0.297	5.86868e-273	2	DNAJB2	Oligodendrocytes
3.85234e-277	0.449812	0.278	0.139	1.292e-272	2	ARHGEF37	Oligodendrocytes
9.99555e-276	0.53061	0.306	0.163	3.35231e-271	2	CD55	Oligodendrocytes
4.73011e-274	0.492227	0.442	0.283	1.58638e-269	2	MITF	Oligodendrocytes
1.70559e-273	0.30359	0.867	0.84	5.7202e-269	2	KIF1B	Oligodendrocytes
8.12543e-273	0.486593	0.555	0.441	2.72511e-268	2	PTMA	Oligodendrocytes
3.64815e-271	0.351181	0.767	0.748	1.22352e-266	2	WSB1	Oligodendrocytes
1.40327e-270	0.555369	0.542	0.461	4.7063e-266	2	SCARB2	Oligodendrocytes
5.71654e-270	0.569896	0.419	0.289	1.91721e-265	2	ARHGAP1	Oligodendrocytes
1.877e-266	0.352182	0.823	0.805	6.29508e-262	2	ZSWIM6	Oligodendrocytes
2.36099e-260	0.579192	0.461	0.34	7.91828e-256	2	AMD1	Oligodendrocytes
9.64601e-260	0.463075	0.655	0.636	3.23508e-255	2	UBE4B	Oligodendrocytes
2.40583e-259	0.55082	0.498	0.391	8.06867e-255	2	BTBD3	Oligodendrocytes
1.72855e-256	0.543614	0.407	0.265	5.79722e-252	2	MKRN3	Oligodendrocytes
4.2116e-256	0.575121	0.344	0.201	1.41248e-251	2	AL139383.1	Oligodendrocytes
2.71469e-255	0.546231	0.436	0.313	9.10453e-251	2	SNX30	Oligodendrocytes
1.92683e-253	0.427548	0.59	0.448	6.46219e-249	2	CHD7	Oligodendrocytes
2.28111e-253	0.444042	0.589	0.478	7.65037e-249	2	SERINC5	Oligodendrocytes
1.24898e-252	0.422043	0.287	0.151	4.18885e-248	2	TUBB4A	Oligodendrocytes
1.50521e-252	0.471544	0.312	0.177	5.04816e-248	2	TJAP1	Oligodendrocytes
5.05002e-249	0.468813	0.593	0.523	1.69368e-244	2	PSME4	Oligodendrocytes
8.20908e-242	0.613707	0.402	0.274	2.75316e-237	2	ENOX2	Oligodendrocytes
1.1211e-241	0.534923	0.5	0.406	3.75993e-237	2	TARSL2	Oligodendrocytes
5.42428e-240	0.551397	0.426	0.31	1.81919e-235	2	ATG13	Oligodendrocytes
6.8602e-239	0.439718	0.76	0.762	2.30077e-234	2	BCAS3	Oligodendrocytes
1.14016e-234	0.333207	0.809	0.816	3.82388e-230	2	TBC1D5	Oligodendrocytes
4.95526e-234	0.507162	0.421	0.3	1.6619e-229	2	ARHGEF2	Oligodendrocytes
7.83799e-234	0.39353	0.696	0.692	2.6287e-229	2	SPAG9	Oligodendrocytes
9.33198e-234	0.455025	0.723	0.562	3.12976e-229	2	MT-ND3	Oligodendrocytes
2.00795e-231	0.345897	0.34	0.196	6.73427e-227	2	CRYAB	Oligodendrocytes
4.74319e-230	0.474934	0.632	0.611	1.59077e-225	2	LRRFIP2	Oligodendrocytes
2.14793e-229	0.452514	0.681	0.68	7.20372e-225	2	SGMS1	Oligodendrocytes
1.96647e-228	0.537087	0.526	0.456	6.59513e-224	2	WDR20	Oligodendrocytes
2.14903e-227	0.421848	0.617	0.571	7.20742e-223	2	TACC1	Oligodendrocytes
1.03375e-225	0.52553	0.286	0.161	3.46699e-221	2	LINC00862	Oligodendrocytes
3.07405e-225	0.579047	0.502	0.427	1.03097e-220	2	TTLL11	Oligodendrocytes
5.90762e-225	0.54124	0.335	0.208	1.9813e-220	2	AC105383.1	Oligodendrocytes
1.8192e-224	0.513959	0.506	0.404	6.10122e-220	2	CDK6	Oligodendrocytes
5.33505e-223	0.455656	0.6	0.553	1.78927e-218	2	NFIX	Oligodendrocytes
2.47857e-221	0.470491	0.585	0.549	8.31261e-217	2	TRPC4AP	Oligodendrocytes
4.58091e-221	0.424587	0.285	0.159	1.53635e-216	2	UNC5B	Oligodendrocytes
1.60297e-220	0.563313	0.528	0.408	5.37606e-216	2	KCTD8	Oligodendrocytes
1.77476e-220	0.521614	0.533	0.47	5.95218e-216	2	SLF2	Oligodendrocytes
6.40912e-220	0.3668	0.775	0.783	2.14949e-215	2	SRPK2	Oligodendrocytes
2.15265e-219	0.512118	0.571	0.499	7.21956e-215	2	GNG7	Oligodendrocytes
2.533e-218	0.49187	0.605	0.572	8.49517e-214	2	RAP1GDS1	Oligodendrocytes
5.2769e-218	0.463469	0.337	0.208	1.76977e-213	2	TSC22D4	Oligodendrocytes
6.00823e-216	0.489789	0.609	0.498	2.01504e-211	2	MT-ND5	Oligodendrocytes
1.79679e-215	0.457068	0.543	0.466	6.02609e-211	2	CYTH1	Oligodendrocytes
7.7471e-214	0.522493	0.534	0.477	2.59822e-209	2	HSD17B4	Oligodendrocytes
7.06892e-213	0.837409	0.376	0.256	2.37077e-208	2	LINC01505	Oligodendrocytes
2.2844e-212	0.326425	0.832	0.831	7.66141e-208	2	ATXN1	Oligodendrocytes
2.47573e-212	0.453482	0.577	0.46	8.30311e-208	2	RASGRF2	Oligodendrocytes
9.00514e-212	0.432776	0.619	0.583	3.02014e-207	2	STK39	Oligodendrocytes
1.29345e-211	0.29158	0.682	0.65	4.33799e-207	2	EPN2	Oligodendrocytes
1.46899e-211	0.490962	0.577	0.542	4.92672e-207	2	VPS35L	Oligodendrocytes
2.64976e-210	0.393987	0.691	0.707	8.88676e-206	2	WNK1	Oligodendrocytes
2.26977e-209	0.502797	0.538	0.474	7.61236e-205	2	KIAA0930	Oligodendrocytes
7.88113e-208	0.492527	0.474	0.372	2.64317e-203	2	SPTLC2	Oligodendrocytes
8.89715e-203	0.465334	0.313	0.194	2.98392e-198	2	FCHO1	Oligodendrocytes
2.73415e-202	0.469947	0.596	0.577	9.16978e-198	2	FAR1	Oligodendrocytes
3.37629e-202	0.53336	0.465	0.372	1.13234e-197	2	TBC1D12	Oligodendrocytes
4.05928e-201	0.511679	0.511	0.449	1.3614e-196	2	SAMD4B	Oligodendrocytes
1.5368e-199	0.483222	0.476	0.373	5.15413e-195	2	REPS2	Oligodendrocytes
3.69176e-199	0.42893	0.627	0.617	1.23814e-194	2	USP32	Oligodendrocytes
1.38811e-198	0.504333	0.532	0.479	4.65545e-194	2	ZNF280D	Oligodendrocytes
2.0211e-197	0.542403	0.404	0.303	6.77837e-193	2	AC106791.1	Oligodendrocytes
3.15691e-197	0.536388	0.287	0.167	1.05876e-192	2	AC078881.1	Oligodendrocytes
4.34716e-197	0.496836	0.675	0.65	1.45795e-192	2	NAALADL2	Oligodendrocytes
2.98793e-196	0.468431	0.331	0.213	1.00209e-191	2	ACSS2	Oligodendrocytes
1.21711e-195	0.419117	0.312	0.19	4.08195e-191	2	CYP27A1	Oligodendrocytes
6.72333e-195	0.494824	0.479	0.397	2.25487e-190	2	FANCL	Oligodendrocytes
5.19918e-194	0.501037	0.432	0.34	1.7437e-189	2	FEZ1	Oligodendrocytes
2.85805e-193	0.476512	0.515	0.446	9.58531e-189	2	BBS2	Oligodendrocytes
3.87506e-192	0.328147	0.62	0.509	1.29962e-187	2	SASH1	Oligodendrocytes
7.25406e-191	0.407498	0.372	0.244	2.43287e-186	2	NDRG2	Oligodendrocytes
2.39282e-190	0.473772	0.385	0.269	8.02505e-186	2	GPSM2	Oligodendrocytes
2.3501e-189	0.413283	0.496	0.356	7.88176e-185	2	STXBP6	Oligodendrocytes
6.82487e-189	0.447507	0.663	0.657	2.28892e-184	2	ACYP2	Oligodendrocytes
1.59653e-186	0.378654	0.722	0.703	5.35443e-182	2	PRKACB	Oligodendrocytes
6.05608e-186	0.407376	0.292	0.173	2.03109e-181	2	PPFIBP2	Oligodendrocytes
3.78997e-185	0.34596	0.721	0.746	1.27108e-180	2	RALGAPA1	Oligodendrocytes
1.37907e-183	0.452107	0.295	0.181	4.62514e-179	2	TCP11L2	Oligodendrocytes
2.07758e-182	0.422355	0.605	0.586	6.96778e-178	2	OSBPL9	Oligodendrocytes
5.5428e-181	0.465056	0.345	0.237	1.85894e-176	2	STMN4	Oligodendrocytes
1.41504e-178	0.431306	0.34	0.228	4.74576e-174	2	GATM	Oligodendrocytes
1.87707e-178	0.41724	0.665	0.662	6.29533e-174	2	NSMCE2	Oligodendrocytes
1.47292e-177	0.336869	0.256	0.142	4.93986e-173	2	S100B	Oligodendrocytes
1.66153e-176	0.386881	0.663	0.669	5.57244e-172	2	ANKRD28	Oligodendrocytes
2.15458e-176	0.492004	0.434	0.347	7.22603e-172	2	NAPEPLD	Oligodendrocytes
8.62252e-175	0.442485	0.385	0.257	2.89182e-170	2	AC087564.1	Oligodendrocytes
2.13019e-174	0.367796	0.669	0.669	7.14425e-170	2	RICTOR	Oligodendrocytes
1.87701e-172	0.504013	0.42	0.336	6.29512e-168	2	ZNF146	Oligodendrocytes
3.45426e-172	0.376486	0.66	0.683	1.15849e-167	2	USP47	Oligodendrocytes
1.04524e-171	0.469316	0.406	0.311	3.50554e-167	2	STARD9	Oligodendrocytes
1.57026e-170	0.314535	0.802	0.777	5.26633e-166	2	UBE2E2	Oligodendrocytes
3.0457e-169	0.450804	0.607	0.614	1.02147e-164	2	FAM13B	Oligodendrocytes
3.69921e-168	0.426458	0.565	0.54	1.24064e-163	2	SESTD1	Oligodendrocytes
1.19598e-166	0.482073	0.393	0.303	4.01109e-162	2	FBXO7	Oligodendrocytes
3.95113e-166	0.362416	0.704	0.686	1.32513e-161	2	TSPAN5	Oligodendrocytes
2.86765e-165	0.408153	0.508	0.433	9.61753e-161	2	CALD1	Oligodendrocytes
8.12404e-165	0.445356	0.591	0.592	2.72464e-160	2	AC118549.1	Oligodendrocytes
1.52215e-164	0.499893	0.484	0.435	5.10498e-160	2	STRN	Oligodendrocytes
1.8763e-164	0.387349	0.628	0.631	6.29274e-160	2	ZNF644	Oligodendrocytes
4.36867e-164	0.502037	0.563	0.506	1.46516e-159	2	PHYHIPL	Oligodendrocytes
4.20207e-163	0.43412	0.573	0.549	1.40929e-158	2	CHKA	Oligodendrocytes
7.76946e-163	0.487133	0.386	0.288	2.60572e-158	2	DUSP16	Oligodendrocytes
1.21682e-161	0.396523	0.27	0.165	4.08098e-157	2	TBC1D2	Oligodendrocytes
2.21819e-161	0.446764	0.313	0.196	7.43938e-157	2	TXNIP	Oligodendrocytes
1.09731e-160	0.328125	0.284	0.175	3.68016e-156	2	ELOVL7	Oligodendrocytes
8.2843e-160	0.401656	0.26	0.156	2.77839e-155	2	MARCKSL1	Oligodendrocytes
2.01564e-159	0.345759	0.265	0.157	6.76004e-155	2	AMPD3	Oligodendrocytes
1.42444e-158	0.490153	0.353	0.259	4.77729e-154	2	BRMS1L	Oligodendrocytes
3.5317e-158	0.3991	0.265	0.162	1.18446e-153	2	SH3BP4	Oligodendrocytes
1.41683e-157	0.361854	0.676	0.71	4.75177e-153	2	POGZ	Oligodendrocytes
3.92208e-157	0.402272	0.621	0.587	1.31539e-152	2	ZNF704	Oligodendrocytes
8.31762e-155	0.281545	0.459	0.332	2.78956e-150	2	GLUL	Oligodendrocytes
1.74094e-154	0.383792	0.299	0.191	5.83875e-150	2	COL16A1	Oligodendrocytes
2.51746e-152	0.327041	0.682	0.71	8.44306e-148	2	MON2	Oligodendrocytes
3.55228e-152	0.462361	0.389	0.305	1.19136e-147	2	ADSS	Oligodendrocytes
3.80282e-152	0.464061	0.457	0.395	1.27539e-147	2	TRAPPC10	Oligodendrocytes
3.13126e-151	0.476033	0.398	0.317	1.05016e-146	2	AC007566.1	Oligodendrocytes
3.62161e-151	0.418607	0.502	0.449	1.21462e-146	2	ATP11A	Oligodendrocytes
7.75588e-150	0.41451	0.298	0.194	2.60117e-145	2	TMEM123	Oligodendrocytes
4.23831e-147	0.280999	0.771	0.796	1.42144e-142	2	FAF1	Oligodendrocytes
3.33228e-146	0.390536	0.536	0.43	1.11758e-141	2	NECAB1	Oligodendrocytes
4.54627e-146	0.487826	0.441	0.366	1.52473e-141	2	IKZF2	Oligodendrocytes
1.03869e-145	0.386452	0.291	0.19	3.48356e-141	2	C1orf198	Oligodendrocytes
4.62688e-145	0.377409	0.289	0.184	1.55176e-140	2	TMCC3	Oligodendrocytes
1.32945e-144	0.435308	0.513	0.446	4.4587e-140	2	RFX3-AS1	Oligodendrocytes
2.8998e-144	0.449903	0.359	0.271	9.72536e-140	2	SEPT8	Oligodendrocytes
5.16558e-143	0.260415	0.783	0.812	1.73243e-138	2	N4BP2L2	Oligodendrocytes
7.16569e-141	0.570773	0.448	0.392	2.40323e-136	2	PLA2G4C	Oligodendrocytes
2.99373e-140	0.355748	0.295	0.192	1.00404e-135	2	PLXNB1	Oligodendrocytes
6.91695e-140	0.367917	0.647	0.684	2.31981e-135	2	UTY	Oligodendrocytes
4.07485e-139	0.469386	0.372	0.282	1.36662e-134	2	AC004158.1	Oligodendrocytes
4.41677e-139	0.318793	0.677	0.683	1.4813e-134	2	TNRC6C	Oligodendrocytes
3.16551e-138	0.438655	0.519	0.481	1.06165e-133	2	MXI1	Oligodendrocytes
7.52357e-138	0.430986	0.53	0.515	2.52325e-133	2	CLIP4	Oligodendrocytes
1.09956e-135	0.387234	0.331	0.234	3.68771e-131	2	MTMR10	Oligodendrocytes
1.93311e-134	0.523448	0.614	0.53	6.48326e-130	2	PDE1A	Oligodendrocytes
5.86963e-134	0.487682	0.429	0.371	1.96856e-129	2	MTMR2	Oligodendrocytes
1.85767e-133	0.387049	0.514	0.455	6.23025e-129	2	LRRC8B	Oligodendrocytes
1.55018e-131	0.393749	0.287	0.195	5.199e-127	2	ENDOD1	Oligodendrocytes
1.85744e-130	0.31696	0.691	0.688	6.22949e-126	2	MICAL3	Oligodendrocytes
1.35682e-129	0.358475	0.615	0.63	4.55049e-125	2	UVRAG	Oligodendrocytes
1.46576e-128	0.491118	0.406	0.338	4.91586e-124	2	TPD52	Oligodendrocytes
8.49263e-126	0.320852	0.567	0.496	2.84826e-121	2	LIFR	Oligodendrocytes
9.86099e-126	0.617866	0.298	0.211	3.30718e-121	2	SVEP1	Oligodendrocytes
5.04409e-125	0.313115	0.629	0.598	1.69169e-120	2	CTTNBP2	Oligodendrocytes
4.63935e-123	0.443195	0.38	0.301	1.55595e-118	2	ANXA4	Oligodendrocytes
4.64472e-123	0.373551	0.436	0.37	1.55775e-118	2	TUBA1A	Oligodendrocytes
8.17529e-122	0.293483	0.691	0.72	2.74183e-117	2	KDM4C	Oligodendrocytes
7.14458e-120	0.36908	0.521	0.475	2.39615e-115	2	CTNNA1	Oligodendrocytes
8.4481e-120	0.398985	0.557	0.563	2.83332e-115	2	INSR	Oligodendrocytes
1.92013e-118	0.493327	0.334	0.253	6.43972e-114	2	AF165147.1	Oligodendrocytes
1.94419e-118	0.410682	0.631	0.647	6.52042e-114	2	GTDC1	Oligodendrocytes
6.357e-118	0.421407	0.253	0.167	2.13201e-113	2	CCDC122	Oligodendrocytes
[truncated: 21,997 more rows]

## Sheet: FigS1A
Gene expression status pre- and post-quality control
Samples	Mean_genes	Mean_transcripts	Mean_mitochondrial_ratio (%)	Before_filtered	After_filtered
4D	3589.18	11069.9	0.137366	18832	17707
31y	2221.79	4625.39	0.680203	12688	12406
32y	2910.66	8994.42	4.01084	12372	11804
48y	2925.26	8755.12	0.29504	16067	15398
50y	2628.17	9482.87	0.895124	6214	5543
56y	4170.95	16894.3	1.4229	5420	4665
60y	3235.24	10115.7	1.63604	8267	7597
64f	2349.93	6411.37	2.38471	5743	5239
64m	2495.17	7160.44	4.97786	6832	6309
68y	3467.96	12489.4	1.67313	7200	6298
