# Supplementary material for: Deciphering molecular heterogeneity and dynamics of human hippocampal neural stem cells at different ages and injury states
Source: eLife. 2024 Apr 12;12:RP89507. doi: 10.7554/eLife.89507 (PMC11014727; doi:10.7554/eLife.89507)
Supplement: Figure 2—source data 1. [file elife-89507-fig2-data1.xlsx]

## Sheet: FigS2D
The differential expression genes of aNSC compared with pNSC
p_val	avg_log2FC	pct.1	pct.2	p_val_adj	gene	Diff
8.59439e-260	-1.65466	0.096	0.919	2.88239e-255	PCCA	DOWN
5.94996e-243	-2.06045	0.476	0.979	1.9955e-238	PPP2R2B	DOWN
2.78757e-240	-2.02703	0.062	0.798	9.34895e-236	LDLRAD3	DOWN
7.73614e-240	-1.65975	0.131	0.936	2.59455e-235	PARD3	DOWN
6.88005e-227	-1.26194	0.092	0.861	2.30743e-222	CDKAL1	DOWN
6.83731e-224	-2.15823	0.556	0.985	2.2931e-219	NPAS3	DOWN
5.67349e-223	-0.848324	0.059	0.781	1.90278e-218	RPTOR	DOWN
2.87369e-219	-1.23297	0.054	0.758	9.63777e-215	FARS2	DOWN
4.76165e-219	-1.13718	0.046	0.74	1.59696e-214	YAP1	DOWN
7.56466e-219	-1.49264	0.096	0.844	2.53704e-214	ZHX2	DOWN
2.18462e-218	-1.67576	0.155	0.922	7.32678e-214	LPP	DOWN
7.45138e-218	-1.6701	0.118	0.87	2.49905e-213	BMPR1B	DOWN
1.73824e-217	-1.68265	0.118	0.867	5.82971e-213	RAD51B	DOWN
6.06254e-217	-1.63738	0.139	0.894	2.03326e-212	PARD3B	DOWN
2.59853e-216	-1.2833	0.059	0.762	8.71496e-212	ZNF516	DOWN
3.58258e-215	-1.26065	0.107	0.867	1.20153e-210	AKAP13	DOWN
2.99861e-214	-2.00933	0.217	0.927	1.00567e-209	PITPNC1	DOWN
1.02976e-212	-1.83657	0.244	0.941	3.45362e-208	MAML2	DOWN
1.46528e-212	-1.12329	0.107	0.857	4.91427e-208	VTI1A	DOWN
1.72375e-211	-1.79271	0.083	0.785	5.7811e-207	CHST11	DOWN
2.04888e-211	-0.900525	0.098	0.85	6.87154e-207	TTC17	DOWN
3.56895e-211	-1.34752	0.098	0.832	1.19695e-206	TEAD1	DOWN
2.22684e-210	-1.54468	0.165	0.925	7.46836e-206	MSI2	DOWN
1.94869e-209	-1.60178	0.084	0.793	6.53551e-205	NHSL1	DOWN
7.5006e-209	-1.11406	0.077	0.791	2.51555e-204	CECR2	DOWN
7.82888e-208	-0.914224	0.119	0.887	2.62565e-203	PPP6R3	DOWN
2.50178e-207	-1.30404	0.113	0.859	8.39046e-203	FNDC3B	DOWN
2.02236e-204	-1.76638	0.056	0.721	6.7826e-200	SHROOM3	DOWN
3.95601e-204	-1.63363	0.571	0.992	1.32677e-199	LRP1B	DOWN
4.22986e-204	-0.84993	0.089	0.815	1.41861e-199	TMEM131	DOWN
4.39184e-204	-0.920776	0.053	0.726	1.47293e-199	XRRA1	DOWN
1.75471e-203	-1.49601	0.111	0.834	5.88496e-199	EXT1	DOWN
2.46078e-202	-0.970788	0.087	0.801	8.25297e-198	BABAM2	DOWN
3.94671e-201	-1.18208	0.109	0.838	1.32365e-196	NSMCE2	DOWN
1.21706e-198	-1.90322	0.295	0.959	4.08177e-194	CAMK2D	DOWN
1.17219e-197	-2.03253	0.26	0.9	3.9313e-193	GLIS3	DOWN
3.39274e-197	-1.52602	0.156	0.869	1.13786e-192	FBXL7	DOWN
7.10227e-197	-0.647101	0.083	0.784	2.38196e-192	FAM120B	DOWN
8.02837e-197	-0.873281	0.076	0.769	2.69255e-192	METTL15	DOWN
1.43146e-196	-1.16999	0.037	0.67	4.80084e-192	ARHGAP42	DOWN
1.51312e-196	-1.06177	0.06	0.724	5.0747e-192	HDAC8	DOWN
3.26269e-196	-1.10375	0.098	0.81	1.09424e-191	CHD7	DOWN
3.255e-195	-1.42278	0.104	0.8	1.09166e-190	PRKD1	DOWN
4.2864e-195	-2.3165	0.065	0.711	1.43757e-190	EGFR	DOWN
5.82282e-195	-0.662706	0.096	0.814	1.95286e-190	MUC20-OT1	DOWN
1.44626e-194	-1.71247	0.144	0.852	4.85047e-190	SAMD4A	DOWN
1.83963e-193	-1.14167	0.074	0.748	6.16975e-189	SH3RF1	DOWN
6.60114e-193	-1.51244	0.108	0.798	2.21389e-188	ARHGEF3	DOWN
2.76962e-192	-1.05682	0.128	0.865	9.28875e-188	CCNY	DOWN
2.81788e-192	-0.978892	0.105	0.818	9.4506e-188	DOCK1	DOWN
2.84571e-192	-0.811975	0.091	0.793	9.54394e-188	NBAS	DOWN
3.58217e-192	-1.63662	0.152	0.872	1.20139e-187	ZEB1	DOWN
3.42419e-191	-0.949797	0.065	0.728	1.14841e-186	SIPA1L3	DOWN
7.21631e-191	-0.843211	0.111	0.834	2.42021e-186	COG5	DOWN
1.45552e-190	-0.997945	0.112	0.831	4.88152e-186	SMG6	DOWN
1.01818e-189	-0.787061	0.088	0.779	3.41478e-185	SND1	DOWN
1.46304e-189	-2.93621	0.071	0.674	4.90675e-185	RGS6	DOWN
2.74418e-189	-0.943354	0.106	0.82	9.20344e-185	STK3	DOWN
1.09988e-188	-1.45646	0.134	0.838	3.68877e-184	LRIG1	DOWN
4.18042e-188	-1.01701	0.096	0.792	1.40203e-183	TRAF3IP2-AS1	DOWN
4.26302e-188	-1.05609	0.065	0.717	1.42973e-183	TBL1X	DOWN
6.54643e-188	-1.24753	0.067	0.717	2.19554e-183	SUMF1	DOWN
8.96935e-188	-1.60339	0.284	0.971	3.00814e-183	TRIO	DOWN
1.79694e-187	-1.09953	0.057	0.697	6.02657e-183	MCC	DOWN
3.40965e-187	-0.773189	0.073	0.742	1.14353e-182	THADA	DOWN
3.82049e-187	-1.09969	0.073	0.733	1.28131e-182	TCF7L2	DOWN
1.6585e-186	-1.24084	0.081	0.749	5.56226e-182	CARMIL1	DOWN
1.70677e-186	-0.89752	0.054	0.69	5.72416e-182	CLEC16A	DOWN
1.97608e-186	-1.88559	0.123	0.782	6.62738e-182	LHFPL6	DOWN
2.19834e-186	-0.703913	0.101	0.803	7.37281e-182	TAF15	DOWN
2.33248e-186	-1.53616	0.347	0.948	7.82269e-182	SORBS1	DOWN
2.82975e-186	-1.09181	0.109	0.811	9.49042e-182	SPIDR	DOWN
4.86151e-186	-1.04302	0.111	0.814	1.63045e-181	GAB2	DOWN
7.25116e-186	-0.783319	0.081	0.757	2.43189e-181	AP3B1	DOWN
1.10085e-185	-1.64429	0.041	0.651	3.69204e-181	GBE1	DOWN
1.2475e-185	-1.01112	0.067	0.715	4.18385e-181	SCFD2	DOWN
1.39891e-185	-0.815047	0.083	0.758	4.69167e-181	C11orf49	DOWN
1.47381e-185	-1.5596	0.242	0.942	4.94288e-181	NAV2	DOWN
1.94587e-185	-1.20149	0.056	0.689	6.52605e-181	MTHFD1L	DOWN
5.23953e-185	-0.995485	0.062	0.707	1.75723e-180	SH3PXD2B	DOWN
5.29309e-185	-0.894814	0.09	0.773	1.7752e-180	RAB3GAP2	DOWN
6.97836e-185	-0.883372	0.101	0.796	2.3404e-180	CDC14B	DOWN
1.04863e-184	-1.64678	0.248	0.929	3.51689e-180	NRCAM	DOWN
2.68697e-184	-1.014	0.075	0.732	9.01156e-180	ZNF462	DOWN
6.18295e-184	-0.666405	0.08	0.748	2.07364e-179	MTMR3	DOWN
8.31926e-184	-0.722166	0.08	0.748	2.79011e-179	PIBF1	DOWN
2.98198e-183	-1.62974	0.14	0.816	1.0001e-178	MAST4	DOWN
3.53765e-183	-1.12103	0.058	0.69	1.18646e-178	GMDS-DT	DOWN
1.56723e-182	-0.811815	0.098	0.786	5.25617e-178	TLK1	DOWN
2.0738e-182	-0.735451	0.096	0.783	6.95511e-178	ZNF532	DOWN
2.53159e-182	-0.729446	0.088	0.768	8.49046e-178	GPCPD1	DOWN
1.22222e-181	-0.843609	0.131	0.858	4.09907e-177	C9orf3	DOWN
2.918e-181	-1.28987	0.215	0.953	9.78639e-177	TNRC6A	DOWN
3.78082e-181	-0.714056	0.118	0.832	1.26801e-176	KANSL1	DOWN
6.09974e-181	-0.685519	0.105	0.802	2.04573e-176	SMC5	DOWN
9.98672e-181	-1.0133	0.148	0.884	3.34934e-176	FAM172A	DOWN
1.54066e-180	-0.834216	0.063	0.7	5.16706e-176	AFF1	DOWN
1.72678e-180	-0.719678	0.049	0.664	5.79127e-176	PARG	DOWN
3.63997e-180	-0.738736	0.084	0.75	1.22077e-175	RNGTT	DOWN
5.08499e-180	-1.20237	0.045	0.652	1.7054e-175	SPRED2	DOWN
7.19296e-180	-0.923781	0.041	0.645	2.41237e-175	PHF21B	DOWN
2.8269e-179	-0.769562	0.091	0.763	9.48086e-175	MAPKAP1	DOWN
6.17761e-179	-0.650636	0.107	0.801	2.07185e-174	FOXJ3	DOWN
7.92056e-179	-0.560738	0.054	0.675	2.6564e-174	THOC2	DOWN
8.55385e-179	-1.07191	0.042	0.644	2.86879e-174	GLDC	DOWN
1.45056e-178	-1.0832	0.115	0.803	4.86489e-174	SUPT3H	DOWN
1.52938e-178	-1.55325	0.635	0.99	5.12924e-174	LSAMP	DOWN
2.15445e-178	-1.0549	0.077	0.723	7.22558e-174	ETV6	DOWN
1.84649e-177	-0.985373	0.134	0.846	6.19275e-173	CDK14	DOWN
3.95078e-177	-0.726722	0.098	0.777	1.32501e-172	MNAT1	DOWN
9.16104e-177	-1.55397	0.238	0.917	3.07243e-172	RORA	DOWN
5.0473e-176	-0.985162	0.044	0.642	1.69276e-171	ANTXR1	DOWN
5.17931e-176	-2.00918	0.118	0.754	1.73704e-171	GPC6	DOWN
5.78316e-176	-0.663274	0.094	0.766	1.93955e-171	WDR70	DOWN
6.69309e-176	-0.673211	0.109	0.799	2.24473e-171	VGLL4	DOWN
8.37462e-176	-1.851	0.039	0.621	2.80868e-171	DPF3	DOWN
1.24267e-175	-1.01694	0.044	0.641	4.16766e-171	FAM85B	DOWN
2.40673e-175	-0.63853	0.095	0.766	8.07167e-171	TENT2	DOWN
3.17004e-175	-0.717086	0.094	0.762	1.06317e-170	HIBCH	DOWN
6.11915e-175	-1.19609	0.152	0.854	2.05224e-170	IGF1R	DOWN
7.00522e-175	-0.795885	0.082	0.731	2.34941e-170	ZNRF3	DOWN
1.0661e-174	-0.698792	0.085	0.736	3.57548e-170	PUM3	DOWN
4.49149e-174	-0.645238	0.112	0.804	1.50636e-169	TRIM44	DOWN
1.31007e-173	-1.11297	0.081	0.721	4.39371e-169	CMSS1	DOWN
1.79788e-173	-0.819658	0.129	0.833	6.02973e-169	FTO	DOWN
2.68554e-173	-0.81687	0.074	0.709	9.00677e-169	EEA1	DOWN
3.53005e-173	-0.58952	0.096	0.762	1.18391e-168	ACBD6	DOWN
4.41568e-173	-0.934345	0.035	0.614	1.48093e-168	CKMT2-AS1	DOWN
5.44664e-173	-1.33629	0.211	0.923	1.82669e-168	TTC28	DOWN
6.395e-173	-1.32488	0.032	0.603	2.14476e-168	MIR29B2CHG	DOWN
8.45193e-173	-0.644462	0.089	0.747	2.83461e-168	CHCHD3	DOWN
1.16082e-172	-0.654357	0.051	0.652	3.89315e-168	DIS3L2	DOWN
1.32633e-172	-0.836006	0.11	0.788	4.44825e-168	PHF21A	DOWN
1.56013e-172	-0.65189	0.069	0.697	5.23238e-168	INTU	DOWN
1.75881e-172	-0.602178	0.13	0.842	5.89869e-168	MLLT10	DOWN
3.34932e-172	-0.728531	0.081	0.723	1.1233e-167	AC245297.3	DOWN
1.83211e-171	-0.794234	0.051	0.649	6.14455e-167	NEK6	DOWN
2.89929e-171	-0.778557	0.051	0.65	9.72365e-167	LYPLAL1	DOWN
9.12198e-171	-0.779743	0.056	0.659	3.05933e-166	STX8	DOWN
1.87663e-170	-0.624317	0.096	0.759	6.29386e-166	TBCK	DOWN
2.8287e-170	-0.534979	0.062	0.676	9.48691e-166	TBC1D19	DOWN
2.8688e-170	-0.553964	0.104	0.777	9.62137e-166	COP1	DOWN
4.13994e-170	-0.888791	0.079	0.711	1.38845e-165	CCDC91	DOWN
6.78403e-170	-0.549237	0.082	0.723	2.27523e-165	HTT	DOWN
1.75325e-169	-0.71287	0.057	0.66	5.88004e-165	CEP192	DOWN
4.11928e-169	-0.425931	0.098	0.762	1.38152e-164	PHC3	DOWN
4.64067e-169	-1.38869	0.14	0.808	1.55639e-164	RFX4	DOWN
8.9611e-169	-0.977161	0.04	0.616	3.00537e-164	COMMD10	DOWN
9.63566e-169	-1.10733	0.195	0.908	3.23161e-164	PRKCA	DOWN
1.14007e-168	-0.780623	0.098	0.752	3.82356e-164	OSBPL9	DOWN
1.30424e-168	-0.587253	0.13	0.834	4.37416e-164	NUTM2A-AS1	DOWN
3.46794e-168	-0.615019	0.093	0.746	1.16308e-163	ZMYM4	DOWN
6.92855e-168	-0.728973	0.146	0.865	2.3237e-163	VPS13B	DOWN
9.22359e-168	-1.23493	0.025	0.576	3.09341e-163	PRTG	DOWN
1.29648e-167	-0.623331	0.109	0.782	4.34813e-163	ATXN10	DOWN
1.78588e-167	-0.985374	0.144	0.842	5.9895e-163	ZCCHC7	DOWN
6.59554e-167	-1.16763	0.14	0.818	2.21201e-162	EHBP1	DOWN
8.4897e-167	-0.614183	0.111	0.784	2.84728e-162	CDK13	DOWN
8.78619e-167	-0.53844	0.073	0.692	2.94671e-162	SCFD1	DOWN
8.98303e-167	-0.957648	0.177	0.908	3.01273e-162	FYN	DOWN
1.52657e-166	-0.978723	0.064	0.667	5.11982e-162	PTPRE	DOWN
1.7548e-166	-0.474912	0.096	0.748	5.88525e-162	DHX36	DOWN
2.25236e-166	-0.662269	0.086	0.72	7.55395e-162	RNF216	DOWN
3.53015e-166	-1.44332	0.368	0.969	1.18394e-161	DTNA	DOWN
3.97485e-166	-0.534372	0.105	0.767	1.33309e-161	PKN2	DOWN
4.17667e-166	-0.937589	0.083	0.709	1.40077e-161	FAM110B	DOWN
1.89267e-165	-0.535623	0.072	0.687	6.34762e-161	REPS1	DOWN
4.04667e-165	-0.669	0.08	0.705	1.35717e-160	JPX	DOWN
7.04294e-165	-0.739618	0.129	0.809	2.36206e-160	FOXN3	DOWN
9.52222e-165	-0.732343	0.1	0.749	3.19356e-160	CUX1	DOWN
1.03793e-164	-0.912481	0.166	0.89	3.481e-160	XPO1	DOWN
1.39638e-164	-1.00552	0.169	0.875	4.68319e-160	TPST1	DOWN
3.08222e-164	-0.380481	0.114	0.787	1.03372e-159	RBM26	DOWN
4.94274e-164	-0.681743	0.125	0.81	1.6577e-159	DOCK7	DOWN
7.12631e-164	-0.94277	0.087	0.714	2.39002e-159	ST8SIA1	DOWN
9.79463e-164	-0.63882	0.087	0.718	3.28492e-159	TBC1D22A	DOWN
1.1402e-163	-0.499093	0.085	0.716	3.82399e-159	SCAF8	DOWN
1.64483e-163	-0.428951	0.08	0.705	5.51643e-159	NOTCH2	DOWN
2.17018e-163	-0.529552	0.092	0.729	7.27834e-159	CHD6	DOWN
3.46878e-163	-0.438535	0.098	0.747	1.16336e-158	UBE3C	DOWN
8.9856e-163	-1.15065	0.018	0.548	3.01359e-158	GLI2	DOWN
9.49626e-163	-0.784585	0.163	0.893	3.18486e-158	FAF1	DOWN
1.24769e-162	-0.674175	0.098	0.743	4.18451e-158	DYNC2H1	DOWN
1.47087e-162	-1.41532	0.16	0.812	4.933e-158	FHIT	DOWN
2.88889e-162	-0.547129	0.121	0.795	9.68877e-158	BRAF	DOWN
3.91719e-162	-0.44812	0.101	0.752	1.31375e-157	EHMT1	DOWN
3.93081e-162	-1.78984	0.081	0.67	1.31831e-157	SLC24A3	DOWN
6.76011e-162	-0.633048	0.135	0.83	2.2672e-157	SETD5	DOWN
8.18309e-162	-0.514852	0.129	0.814	2.74444e-157	SENP6	DOWN
1.35044e-161	-1.16359	0.039	0.597	4.52912e-157	STK33	DOWN
1.75569e-161	-0.594418	0.13	0.819	5.88822e-157	DENND1A	DOWN
2.21936e-161	-0.373542	0.088	0.719	7.44328e-157	RBM33	DOWN
3.53494e-161	-0.451612	0.127	0.81	1.18555e-156	PTBP2	DOWN
3.59704e-161	-0.618498	0.059	0.645	1.20637e-156	COA1	DOWN
4.09091e-161	-0.746485	0.061	0.649	1.37201e-156	UBE2E1	DOWN
4.14269e-161	-0.902048	0.039	0.595	1.38938e-156	RHBDD1	DOWN
4.53347e-161	-0.578424	0.13	0.813	1.52044e-156	HERC4	DOWN
4.84696e-161	-0.465077	0.077	0.69	1.62557e-156	TLK2	DOWN
5.41283e-161	-0.692482	0.134	0.819	1.81535e-156	STAG1	DOWN
5.49044e-161	-1.0325	0.081	0.687	1.84138e-156	PID1	DOWN
7.66699e-161	-1.10887	0.078	0.68	2.57136e-156	LTBP1	DOWN
8.13809e-161	-0.809921	0.135	0.81	2.72935e-156	LYST	DOWN
1.07337e-160	-0.763865	0.136	0.817	3.59988e-156	MKL1	DOWN
1.19226e-160	-0.703334	0.09	0.719	3.99862e-156	ZFHX4	DOWN
1.67929e-160	-0.618413	0.063	0.654	5.63199e-156	ABL2	DOWN
1.86469e-160	-0.467095	0.14	0.838	6.25378e-156	ATXN2	DOWN
1.97949e-160	-0.957575	0.044	0.606	6.6388e-156	ACVR1	DOWN
2.86386e-160	-0.595721	0.055	0.633	9.60483e-156	NSRP1	DOWN
3.91841e-160	-0.389827	0.086	0.711	1.31416e-155	SEC31A	DOWN
7.35255e-160	-0.470989	0.088	0.715	2.4659e-155	RPS6KC1	DOWN
8.72485e-160	-0.732478	0.117	0.777	2.92614e-155	WDPCP	DOWN
1.21012e-159	-0.622818	0.119	0.785	4.05849e-155	NR2F1-AS1	DOWN
1.64911e-159	-0.73015	0.066	0.658	5.53079e-155	RAB31	DOWN
2.17415e-159	-0.8401	0.176	0.906	7.29168e-155	SBF2	DOWN
4.39571e-159	-0.764348	0.153	0.85	1.47423e-154	ADK	DOWN
5.76308e-159	-0.94654	0.129	0.786	1.93282e-154	CLIP1	DOWN
9.92337e-159	-0.799301	0.119	0.773	3.3281e-154	AHCYL2	DOWN
1.09895e-158	-0.472554	0.076	0.682	3.68565e-154	VPS35L	DOWN
1.65725e-158	-0.869919	0.037	0.583	5.5581e-154	FGGY	DOWN
1.88804e-158	-0.494201	0.08	0.692	6.3321e-154	MFSD14C	DOWN
2.12621e-158	-0.495205	0.081	0.692	7.13087e-154	GBF1	DOWN
3.28648e-158	-0.39357	0.093	0.723	1.10222e-153	ITCH	DOWN
3.45612e-158	-0.732922	0.057	0.634	1.15911e-153	ANO6	DOWN
3.86671e-158	-0.452923	0.126	0.801	1.29682e-153	TRPM7	DOWN
1.11034e-157	-1.46556	0.057	0.621	3.72385e-153	LMCD1-AS1	DOWN
1.12774e-157	-0.475274	0.103	0.743	3.78221e-153	PPP6R2	DOWN
1.16258e-157	-1.15704	0.045	0.601	3.89907e-153	UST	DOWN
1.35541e-157	-0.467393	0.072	0.668	4.54576e-153	2023-03-07	DOWN
1.90066e-157	-0.411722	0.081	0.69	6.37443e-153	FRS2	DOWN
2.22619e-157	-0.397945	0.171	0.906	7.46619e-153	MARK3	DOWN
2.33358e-157	-1.50129	0.174	0.812	7.82635e-153	CD44	DOWN
2.64168e-157	-0.50327	0.069	0.661	8.85965e-153	NCOA6	DOWN
2.95324e-157	-0.903441	0.117	0.763	9.90457e-153	SRGAP1	DOWN
2.95721e-157	-0.468013	0.11	0.759	9.9179e-153	UBR1	DOWN
3.10964e-157	-0.8992	0.073	0.665	1.04291e-152	PCSK5	DOWN
9.3286e-157	-0.5966	0.064	0.647	3.12862e-152	MTR	DOWN
1.25496e-156	-0.901651	0.12	0.769	4.20889e-152	XKR6	DOWN
1.49277e-156	-1.02524	0.096	0.712	5.00646e-152	SLC4A7	DOWN
1.67832e-156	-0.463717	0.096	0.723	5.62875e-152	ATP9B	DOWN
1.84617e-156	-0.630224	0.046	0.601	6.1917e-152	CCDC93	DOWN
2.02759e-156	-0.767461	0.082	0.686	6.80014e-152	SYNE2	DOWN
2.1981e-156	-0.801679	0.034	0.572	7.37198e-152	NSMAF	DOWN
3.3783e-156	-0.667576	0.071	0.661	1.13301e-151	SCMH1	DOWN
7.96126e-156	-0.91098	0.175	0.885	2.67005e-151	ASAP1	DOWN
9.1549e-156	-0.335897	0.076	0.675	3.07037e-151	SFSWAP	DOWN
1.19062e-155	-0.940474	0.121	0.767	3.99309e-151	TTTY14	DOWN
1.63348e-155	-0.932185	0.116	0.75	5.47836e-151	TENM4	DOWN
2.51807e-155	-1.08514	0.197	0.911	8.44511e-151	EXOC4	DOWN
2.90107e-155	-0.65557	0.12	0.772	9.7296e-151	BCL6	DOWN
3.1904e-155	-0.690982	0.069	0.653	1.07e-150	COMMD1	DOWN
3.90614e-155	-0.315523	0.11	0.759	1.31004e-150	GIGYF2	DOWN
4.2375e-155	-0.733617	0.112	0.753	1.42117e-150	PACS1	DOWN
6.20995e-155	-0.426999	0.099	0.727	2.08269e-150	LRCH3	DOWN
8.5585e-155	-1.0656	0.053	0.612	2.87035e-150	EVA1C	DOWN
1.17708e-154	-1.19774	0.054	0.612	3.9477e-150	CPNE8	DOWN
2.61519e-154	-0.647107	0.071	0.656	8.77082e-150	ZFAND6	DOWN
2.97431e-154	-0.859877	0.06	0.627	9.97523e-150	UMAD1	DOWN
3.22411e-154	-0.753352	0.044	0.593	1.0813e-149	AF117829.1	DOWN
3.58125e-154	-0.467425	0.071	0.657	1.20108e-149	EP400	DOWN
4.51256e-154	-0.885603	0.19	0.909	1.51342e-149	ARID1B	DOWN
5.44028e-154	-0.523482	0.074	0.666	1.82456e-149	DENND4C	DOWN
5.95974e-154	-0.813551	0.999	1	1.99878e-149	MALAT1	DOWN
6.68366e-154	-1.02286	0.052	0.611	2.24157e-149	PLCE1	DOWN
9.82198e-154	-0.59587	0.053	0.612	3.2941e-149	MED27	DOWN
1.61102e-153	-0.691059	0.073	0.659	5.40304e-149	TRAPPC9	DOWN
2.48543e-153	-0.633257	0.118	0.764	8.33563e-149	FAM135A	DOWN
2.61745e-153	-0.442181	0.107	0.744	8.77842e-149	NFE2L2	DOWN
2.86048e-153	-0.522297	0.088	0.699	9.59349e-149	NEK1	DOWN
3.03943e-153	-0.653774	0.101	0.721	1.01936e-148	SASH1	DOWN
3.38351e-153	-1.64939	0.197	0.839	1.13476e-148	SMYD3	DOWN
3.87526e-153	-1.16052	0.185	0.866	1.29969e-148	SOX6	DOWN
4.36713e-153	-0.644384	0.118	0.766	1.46465e-148	DENND5B	DOWN
8.08931e-153	-0.904044	0.034	0.562	2.71299e-148	MAP3K20	DOWN
1.00286e-152	-0.732226	0.106	0.733	3.3634e-148	MARK1	DOWN
1.28508e-152	-1.34343	0.472	0.982	4.3099e-148	ZBTB20	DOWN
2.06676e-152	-0.529747	0.097	0.716	6.93149e-148	CBFA2T2	DOWN
2.19461e-152	-1.19553	0.388	0.972	7.36028e-148	CTNND2	DOWN
2.49448e-152	-0.952772	0.19	0.89	8.366e-148	AGAP1	DOWN
2.79261e-152	-0.596626	0.05	0.603	9.36584e-148	ARHGEF10L	DOWN
2.81403e-152	-0.509795	0.044	0.589	9.43769e-148	EPS15L1	DOWN
3.19226e-152	-0.815129	0.036	0.566	1.07062e-147	PRDM16	DOWN
3.4301e-152	-0.645711	0.116	0.756	1.15039e-147	SFXN5	DOWN
3.57204e-152	-0.325241	0.138	0.816	1.19799e-147	NCOR1	DOWN
4.80996e-152	-0.515982	0.1	0.721	1.61317e-147	TOM1L2	DOWN
6.77289e-152	-0.739042	0.107	0.731	2.27149e-147	IARS	DOWN
6.94995e-152	-0.721248	0.052	0.606	2.33087e-147	SLC16A1-AS1	DOWN
9.94704e-152	-0.40445	0.098	0.719	3.33604e-147	FNBP4	DOWN
1.01029e-151	-0.616491	0.082	0.677	3.3883e-147	VWA8	DOWN
2.01271e-151	-0.412916	0.111	0.748	6.75023e-147	ZMIZ1	DOWN
2.66253e-151	-0.379987	0.108	0.742	8.92959e-147	AGO3	DOWN
2.67852e-151	-0.857784	0.075	0.657	8.98323e-147	BACH1	DOWN
2.92825e-151	-0.570189	0.157	0.849	9.82077e-147	MAP4K5	DOWN
4.36662e-151	-0.356783	0.092	0.701	1.46448e-146	SNX13	DOWN
5.26941e-151	-0.677827	0.06	0.621	1.76725e-146	ULK4	DOWN
5.70091e-151	-0.507018	0.073	0.656	1.91197e-146	IGF2R	DOWN
6.4348e-151	-0.383773	0.097	0.715	2.1581e-146	ZNF207	DOWN
8.82043e-151	-0.568326	0.074	0.657	2.9582e-146	TAF1	DOWN
1.1387e-150	-0.426946	0.077	0.665	3.81898e-146	TFCP2	DOWN
1.21177e-150	-0.809639	0.084	0.679	4.06402e-146	DANT2	DOWN
1.29866e-150	-0.614727	0.087	0.685	4.35544e-146	ATG7	DOWN
1.63778e-150	-0.356762	0.104	0.731	5.49279e-146	PBRM1	DOWN
1.71314e-150	-0.668274	0.099	0.714	5.74553e-146	STON2	DOWN
1.87754e-150	-0.957503	0.112	0.729	6.2969e-146	NLGN4Y	DOWN
1.88019e-150	-1.01777	0.235	0.958	6.30577e-146	ZFAND3	DOWN
1.93225e-150	-0.698565	0.066	0.635	6.48037e-146	TIMM23B	DOWN
2.21832e-150	-0.650168	0.035	0.561	7.43979e-146	PHYKPL	DOWN
2.41449e-150	-0.37829	0.075	0.66	8.09771e-146	NEMF	DOWN
2.83938e-150	-0.519995	0.062	0.627	9.52272e-146	NFX1	DOWN
2.89788e-150	-0.519783	0.062	0.628	9.71891e-146	CBFB	DOWN
3.64797e-150	-0.284865	0.114	0.754	1.22346e-145	HERC2	DOWN
4.09856e-150	-0.629744	0.051	0.601	1.37457e-145	ZNF586	DOWN
4.70061e-150	-0.545871	0.096	0.709	1.57649e-145	KIF13A	DOWN
4.8008e-150	-0.897952	0.098	0.703	1.61009e-145	SERINC5	DOWN
4.97178e-150	-1.46044	0.474	0.951	1.66744e-145	MIR99AHG	DOWN
7.42213e-150	-0.527874	0.091	0.695	2.48923e-145	SGMS1	DOWN
7.97042e-150	-0.60284	0.051	0.597	2.67312e-145	ZNF44	DOWN
9.19736e-150	-0.457943	0.131	0.792	3.08461e-145	MYO6	DOWN
1.02776e-149	-0.590569	0.073	0.649	3.44691e-145	ZFHX3	DOWN
1.49501e-149	-0.689591	0.08	0.664	5.01397e-145	APBA2	DOWN
1.77812e-149	-0.949902	0.119	0.743	5.96344e-145	ABLIM1	DOWN
2.37553e-149	-0.765552	0.06	0.615	7.96705e-145	NUBPL	DOWN
2.44148e-149	-0.805632	0.041	0.572	8.18823e-145	SPATA5	DOWN
2.68502e-149	-0.354615	0.063	0.627	9.00501e-145	TYW1	DOWN
2.88581e-149	-0.474851	0.039	0.568	9.67843e-145	AC097103.2	DOWN
3.55252e-149	-0.855381	0.135	0.78	1.19144e-144	FOXP1	DOWN
3.61901e-149	-0.480277	0.135	0.796	1.21375e-144	VPS53	DOWN
4.94812e-149	-1.7866	0.31	0.883	1.6595e-144	AC092691.1	DOWN
6.53886e-149	-0.364536	0.127	0.782	2.193e-144	PCNX1	DOWN
6.6786e-149	-1.23432	0.158	0.798	2.23987e-144	NOVA1	DOWN
7.03533e-149	-0.989075	0.15	0.803	2.35951e-144	UBE2E2	DOWN
1.05868e-148	-0.353085	0.087	0.685	3.55061e-144	LONP2	DOWN
1.83153e-148	-1.33109	0.293	0.927	6.14257e-144	NFIA	DOWN
1.96096e-148	-0.496493	0.067	0.634	6.57666e-144	ERCC6L2	DOWN
2.05747e-148	-0.50796	0.041	0.571	6.90035e-144	KIAA0556	DOWN
2.75699e-148	-0.440348	0.062	0.623	9.2464e-144	IPO9	DOWN
2.79426e-148	-0.509448	0.067	0.633	9.37138e-144	KIAA0319L	DOWN
2.80841e-148	-0.766997	0.051	0.593	9.41885e-144	SMAD1	DOWN
3.34084e-148	-0.539281	0.065	0.629	1.12045e-143	MAP2K5	DOWN
3.55319e-148	-0.836504	0.123	0.75	1.19167e-143	SETBP1	DOWN
4.40344e-148	-0.367596	0.062	0.62	1.47683e-143	UBAP1	DOWN
4.67907e-148	-0.732161	0.103	0.71	1.56927e-143	RPS6KA2	DOWN
4.78202e-148	-0.68528	0.079	0.661	1.6038e-143	CDYL	DOWN
6.09312e-148	-0.427884	0.105	0.722	2.04351e-143	C20orf194	DOWN
6.54342e-148	-0.708053	0.145	0.806	2.19453e-143	SPIRE1	DOWN
7.58601e-148	-1.09265	0.229	0.933	2.5442e-143	REV3L	DOWN
8.04515e-148	-0.46086	0.072	0.644	2.69818e-143	TTC7B	DOWN
1.01553e-147	-0.56883	0.053	0.599	3.40587e-143	DLG5	DOWN
1.09319e-147	-0.672959	0.118	0.75	3.66633e-143	PDE8A	DOWN
1.10562e-147	-0.826315	0.205	0.924	3.70801e-143	CHD9	DOWN
1.3845e-147	-0.450624	0.137	0.8	4.64334e-143	ARHGEF12	DOWN
1.5182e-147	-0.914995	0.038	0.56	5.09173e-143	ACSS3	DOWN
2.20911e-147	-0.279778	0.076	0.657	7.4089e-143	WASHC4	DOWN
2.43143e-147	-0.331641	0.145	0.822	8.15455e-143	UBR3	DOWN
3.08816e-147	-0.552485	0.151	0.826	1.03571e-142	TJP1	DOWN
3.69058e-147	-0.458632	0.087	0.679	1.23775e-142	PHKB	DOWN
5.00877e-147	-0.360313	0.084	0.675	1.67984e-142	RAF1	DOWN
5.8605e-147	-0.478753	0.066	0.629	1.96549e-142	CDC73	DOWN
7.23862e-147	-0.365346	0.103	0.718	2.42769e-142	STRN3	DOWN
8.54008e-147	-0.582469	0.084	0.671	2.86417e-142	RPRD2	DOWN
9.08187e-147	-0.988837	0.185	0.864	3.04588e-142	ATXN1	DOWN
1.20843e-146	-0.480623	0.122	0.755	4.05284e-142	ACYP2	DOWN
1.29769e-146	-0.474426	0.115	0.745	4.35218e-142	STAT3	DOWN
1.36174e-146	-0.739142	0.066	0.625	4.56699e-142	AL139260.1	DOWN
1.37635e-146	-0.706754	0.212	0.943	4.61599e-142	DIP2C	DOWN
1.78285e-146	-0.468621	0.086	0.676	5.97932e-142	PIP5K1A	DOWN
2.07574e-146	-0.579525	0.055	0.601	6.9616e-142	PDSS2	DOWN
2.6302e-146	-0.321849	0.128	0.777	8.82117e-142	SETD2	DOWN
2.63445e-146	-0.423927	0.164	0.862	8.83543e-142	RBM6	DOWN
3.0562e-146	-0.951333	0.145	0.788	1.02499e-141	BACH2	DOWN
3.53133e-146	-0.503656	0.07	0.635	1.18434e-141	PHACTR4	DOWN
4.35805e-146	-0.595559	0.048	0.582	1.4616e-141	ZNF254	DOWN
4.97703e-146	-0.682013	0.18	0.878	1.6692e-141	EXOC6B	DOWN
6.56827e-146	-0.96721	0.018	0.508	2.20287e-141	OSMR-AS1	DOWN
1.21428e-145	-0.296109	0.093	0.691	4.07245e-141	USP24	DOWN
1.2353e-145	-0.674363	0.043	0.569	4.14295e-141	MAP3K4	DOWN
1.27813e-145	-0.435456	0.071	0.636	4.28659e-141	PRKRIP1	DOWN
1.49695e-145	-1.10345	0.148	0.772	5.02048e-141	ELL2	DOWN
1.77359e-145	-0.434331	0.064	0.621	5.94827e-141	NAA25	DOWN
2.21604e-145	-1.04541	0.507	0.986	7.43216e-141	NEAT1	DOWN
3.36213e-145	-0.303441	0.138	0.798	1.12759e-140	MON2	DOWN
3.73084e-145	-0.303373	0.134	0.79	1.25125e-140	GPBP1	DOWN
3.74179e-145	-0.587225	0.045	0.573	1.25492e-140	USP40	DOWN
3.78599e-145	-1.35265	0.056	0.59	1.26974e-140	NPAS2	DOWN
5.10213e-145	-0.352556	0.095	0.693	1.71115e-140	SPART	DOWN
5.80125e-145	-1.22356	0.108	0.695	1.94562e-140	SLC35F1	DOWN
9.61199e-145	-0.681089	0.104	0.709	3.22367e-140	ZNF608	DOWN
1.23833e-144	-1.34826	0.143	0.741	4.1531e-140	WWOX	DOWN
1.52921e-144	-0.465077	0.064	0.619	5.12865e-140	PIK3CB	DOWN
1.53012e-144	-0.505618	0.119	0.746	5.13172e-140	ANKRD28	DOWN
1.545e-144	-0.513619	0.104	0.71	5.18164e-140	CTBP2	DOWN
2.11455e-144	-0.604012	0.041	0.56	7.09176e-140	SLX4IP	DOWN
2.30558e-144	-0.369121	0.087	0.673	7.73246e-140	FAM13B	DOWN
2.42135e-144	-0.775756	0.074	0.635	8.12072e-140	KANK1	DOWN
2.79693e-144	-0.687107	0.097	0.69	9.38034e-140	ABI1	DOWN
2.88461e-144	-0.411857	0.053	0.592	9.6744e-140	RIMKLB	DOWN
5.08558e-144	-0.738017	0.207	0.922	1.7056e-139	MKLN1	DOWN
5.20019e-144	-0.583562	0.111	0.725	1.74404e-139	ST7	DOWN
5.60945e-144	-0.369067	0.079	0.653	1.8813e-139	PDCD6IP	DOWN
1.18301e-143	-0.393588	0.081	0.655	3.96757e-139	CNOT4	DOWN
1.30695e-143	-0.477332	0.123	0.752	4.38325e-139	TMCC1	DOWN
1.46125e-143	-0.327685	0.127	0.767	4.90076e-139	RABGAP1	DOWN
1.66836e-143	-0.630919	0.192	0.908	5.59534e-139	N4BP2L2	DOWN
1.78519e-143	-0.511319	0.18	0.891	5.98719e-139	CLASP1	DOWN
1.83537e-143	-0.27164	0.106	0.717	6.15548e-139	CREBBP	DOWN
2.26786e-143	-0.532142	0.056	0.595	7.60593e-139	METTL16	DOWN
2.36803e-143	-0.629295	0.067	0.621	7.94191e-139	ARID2	DOWN
2.56547e-143	-0.529091	0.103	0.705	8.60409e-139	CNN3	DOWN
2.94335e-143	-0.472896	0.113	0.728	9.87141e-139	BMPR1A	DOWN
3.19806e-143	-0.438257	0.1	0.701	1.07256e-138	MGA	DOWN
4.11282e-143	-0.411022	0.073	0.637	1.37936e-138	ZZEF1	DOWN
7.75592e-143	-0.420801	0.114	0.73	2.60118e-138	ACACA	DOWN
8.40456e-143	-0.438769	0.106	0.713	2.81872e-138	ZFYVE16	DOWN
9.78896e-143	-0.263979	0.085	0.666	3.28302e-138	HELZ	DOWN
1.20103e-142	-0.304539	0.124	0.758	4.02801e-138	USP47	DOWN
1.2463e-142	-0.391939	0.129	0.767	4.17984e-138	UTY	DOWN
1.4959e-142	-0.549637	0.099	0.693	5.01696e-138	POU2F1	DOWN
1.49795e-142	-0.305715	0.156	0.839	5.02381e-138	TUT4	DOWN
1.72687e-142	-0.552456	0.129	0.766	5.79156e-138	HSD17B12	DOWN
1.92728e-142	-0.364936	0.075	0.641	6.4637e-138	MTREX	DOWN
2.43035e-142	-0.411259	0.062	0.609	8.1509e-138	ARMH3	DOWN
2.61327e-142	-0.563903	0.046	0.568	8.76437e-138	ASAP2	DOWN
4.13549e-142	-0.908219	0.039	0.55	1.38696e-137	PLPP3	DOWN
4.60276e-142	-0.340599	0.083	0.657	1.54368e-137	CPLANE1	DOWN
5.22774e-142	-0.473379	0.095	0.684	1.75328e-137	USP32	DOWN
7.3651e-142	-0.532293	0.071	0.625	2.47011e-137	WRN	DOWN
7.4734e-142	-0.327084	0.095	0.687	2.50643e-137	ATM	DOWN
7.49027e-142	-0.385879	0.093	0.681	2.51209e-137	PI4KA	DOWN
7.94829e-142	-0.3978	0.147	0.808	2.6657e-137	ITFG1	DOWN
9.04326e-142	-0.43973	0.106	0.708	3.03293e-137	NEO1	DOWN
1.05607e-141	-0.864186	0.105	0.698	3.54184e-137	PTPRM	DOWN
1.0755e-141	-0.639174	0.052	0.582	3.60703e-137	AC009690.1	DOWN
1.08914e-141	-0.54324	0.116	0.732	3.65274e-137	SEPT11	DOWN
1.48446e-141	-0.469696	0.073	0.631	4.97857e-137	SPG11	DOWN
1.50957e-141	-0.31278	0.077	0.642	5.06281e-137	ZNF131	DOWN
1.59494e-141	-0.484474	0.149	0.807	5.3491e-137	PEAK1	DOWN
2.00521e-141	-0.39771	0.101	0.698	6.72508e-137	CAPZB	DOWN
2.90312e-141	-0.386985	0.07	0.624	9.73649e-137	ADAM17	DOWN
3.39102e-141	-0.702419	0.172	0.854	1.13728e-136	TBC1D5	DOWN
3.47939e-141	-1.00173	0.082	0.641	1.16692e-136	RASSF8	DOWN
3.82636e-141	-0.438513	0.06	0.598	1.28328e-136	ERI3	DOWN
4.47106e-141	-0.282717	0.113	0.728	1.4995e-136	TTC37	DOWN
4.53156e-141	-0.296648	0.162	0.846	1.5198e-136	VPS13C	DOWN
5.97178e-141	-0.662198	0.018	0.494	2.00281e-136	NBPF19	DOWN
7.15314e-141	-0.584263	0.081	0.644	2.39902e-136	ENTPD1-AS1	DOWN
1.10079e-140	-0.865673	0.061	0.595	3.69184e-136	CAMKMT	DOWN
1.25667e-140	-0.547535	0.089	0.664	4.21461e-136	ASCC3	DOWN
1.53176e-140	-0.345575	0.094	0.679	5.13722e-136	VPS13D	DOWN
1.73472e-140	-0.393449	0.124	0.752	5.81791e-136	NRDC	DOWN
1.92578e-140	-0.588465	0.1	0.689	6.45869e-136	UGGT2	DOWN
2.04839e-140	-1.07982	0.035	0.534	6.86989e-136	PVT1	DOWN
2.12717e-140	-0.426142	0.161	0.837	7.13409e-136	DYRK1A	DOWN
2.32628e-140	-0.710619	0.088	0.661	7.80187e-136	SPATA6	DOWN
2.36869e-140	-1.4949	0.253	0.834	7.9441e-136	DPP6	DOWN
2.46184e-140	-0.724788	0.053	0.578	8.25652e-136	IGSF11	DOWN
3.53271e-140	-0.75379	0.039	0.544	1.1848e-135	AC116366.3	DOWN
3.56166e-140	-0.386866	0.087	0.663	1.19451e-135	ZNF518A	DOWN
3.59891e-140	-0.616966	0.043	0.556	1.207e-135	WDR41	DOWN
4.68612e-140	-0.324158	0.14	0.786	1.57163e-135	NCOA2	DOWN
4.9155e-140	-0.589793	0.108	0.707	1.64856e-135	PCGF5	DOWN
5.36298e-140	-0.518313	0.062	0.603	1.79864e-135	CARS	DOWN
6.83033e-140	-0.728156	0.051	0.574	2.29076e-135	ARHGEF26	DOWN
7.45606e-140	-0.618776	0.033	0.529	2.50061e-135	SLC38A6	DOWN
8.08754e-140	-0.399085	0.166	0.846	2.7124e-135	TNKS	DOWN
8.6438e-140	-0.601024	0.159	0.818	2.89896e-135	TMEM161B-AS1	DOWN
1.06003e-139	-0.334778	0.119	0.737	3.55511e-135	LRPPRC	DOWN
1.26961e-139	-0.626133	0.038	0.54	4.25801e-135	STX18	DOWN
1.60351e-139	-0.695371	0.06	0.594	5.37785e-135	PDLIM5	DOWN
1.6615e-139	-0.551023	0.052	0.576	5.57233e-135	MBD2	DOWN
2.0861e-139	-0.464988	0.073	0.627	6.99637e-135	ARFGEF2	DOWN
2.12526e-139	-0.478638	0.143	0.788	7.12771e-135	HIPK2	DOWN
2.6843e-139	-0.482515	0.069	0.615	9.0026e-135	SNX9	DOWN
2.72201e-139	-0.477667	0.176	0.866	9.12906e-135	ANKRD17	DOWN
3.67832e-139	-0.529126	0.073	0.623	1.23363e-134	GALNT2	DOWN
4.6308e-139	-0.967024	0.049	0.564	1.55308e-134	ANKFN1	DOWN
4.6491e-139	-1.07788	0.108	0.687	1.55922e-134	ASTN2	DOWN
5.74853e-139	-0.70594	0.182	0.865	1.92794e-134	APC	DOWN
6.82105e-139	-0.63457	0.078	0.633	2.28764e-134	ELP4	DOWN
7.89202e-139	-0.425805	0.063	0.602	2.64683e-134	PIAS2	DOWN
8.09211e-139	-0.383491	0.146	0.799	2.71393e-134	GPATCH8	DOWN
9.42309e-139	-0.467336	0.076	0.633	3.16032e-134	SLC25A13	DOWN
1.00425e-138	-0.482581	0.059	0.589	3.36805e-134	NRF1	DOWN
1.11242e-138	-1.2577	0.151	0.762	3.73084e-134	TNC	DOWN
1.13683e-138	-0.528821	0.057	0.585	3.81269e-134	FBXO42	DOWN
1.16013e-138	-0.366138	0.096	0.678	3.89086e-134	TAB2	DOWN
1.17363e-138	-0.543747	0.039	0.54	3.93611e-134	PRPF40B	DOWN
1.35849e-138	-0.481211	0.088	0.659	4.5561e-134	CLIP2	DOWN
2.39381e-138	-0.630923	0.043	0.55	8.02836e-134	ORC3	DOWN
2.96776e-138	-0.63078	0.073	0.619	9.95329e-134	CBLB	DOWN
3.22201e-138	-0.285333	0.142	0.791	1.0806e-133	PPP1R12A	DOWN
3.41484e-138	-0.634133	0.164	0.824	1.14527e-133	BAZ2B	DOWN
4.4243e-138	-0.691787	0.066	0.605	1.48382e-133	FHOD3	DOWN
6.23725e-138	-0.716848	0.061	0.589	2.09185e-133	ANO10	DOWN
1.15658e-137	-0.289318	0.12	0.737	3.87892e-133	PAXBP1	DOWN
1.27639e-137	-0.68394	0.016	0.48	4.28077e-133	KLHL22	DOWN
1.32308e-137	-0.578159	0.057	0.582	4.43736e-133	RSRC1	DOWN
1.55621e-137	-0.325278	0.107	0.703	5.21922e-133	POGZ	DOWN
1.57092e-137	-0.44831	0.147	0.796	5.26854e-133	NFAT5	DOWN
1.5857e-137	-0.530682	0.093	0.667	5.31812e-133	EPS8	DOWN
1.78684e-137	-0.376752	0.074	0.625	5.99269e-133	FAM222B	DOWN
1.85425e-137	-0.330319	0.102	0.69	6.2188e-133	SLTM	DOWN
1.88754e-137	-0.68606	0.064	0.599	6.33044e-133	ZNF407	DOWN
2.16604e-137	-0.257642	0.111	0.712	7.26447e-133	CUL3	DOWN
2.66426e-137	-0.56383	0.164	0.829	8.93539e-133	MAP4	DOWN
2.6824e-137	-0.357053	0.067	0.606	8.99624e-133	HIPK3	DOWN
3.0227e-137	-0.323259	0.136	0.773	1.01375e-132	SMCHD1	DOWN
3.21819e-137	-0.81119	0.131	0.744	1.07932e-132	MSRA	DOWN
5.59098e-137	-0.385572	0.11	0.707	1.8751e-132	KDM4C	DOWN
7.30831e-137	-0.639242	0.124	0.729	2.45106e-132	ANKRD10	DOWN
9.73128e-137	-1.01599	0.025	0.5	3.26368e-132	TCF7L1	DOWN
1.05435e-136	-0.462876	0.069	0.607	3.53607e-132	VPS54	DOWN
2.0536e-136	-0.528319	0.036	0.528	6.88736e-132	ATG5	DOWN
2.16614e-136	-0.806001	0.182	0.842	7.26481e-132	BICD1	DOWN
2.44715e-136	-0.412281	0.099	0.679	8.20727e-132	FOCAD	DOWN
3.54696e-136	-0.737512	0.032	0.518	1.18958e-131	DHRSX	DOWN
5.91629e-136	-0.301829	0.058	0.58	1.98421e-131	KRIT1	DOWN
7.1769e-136	-0.538449	0.056	0.576	2.40699e-131	NEK7	DOWN
1.07544e-135	-0.273718	0.123	0.737	3.6068e-131	ARHGEF7	DOWN
1.13629e-135	-0.541921	0.19	0.888	3.81088e-131	RUFY3	DOWN
1.29943e-135	-0.513321	0.048	0.555	4.35804e-131	CWC27	DOWN
2.10214e-135	-0.446714	0.118	0.721	7.05016e-131	RAPGEF1	DOWN
3.37825e-135	-0.507608	0.151	0.794	1.133e-130	TBL1XR1	DOWN
3.5024e-135	-0.468874	0.063	0.592	1.17463e-130	AUH	DOWN
4.44327e-135	-1.04344	0.168	0.773	1.49018e-130	NCKAP5	DOWN
4.53481e-135	-0.410785	0.048	0.554	1.52088e-130	UQCC1	DOWN
5.64597e-135	-0.459462	0.118	0.719	1.89355e-130	ZNF609	DOWN
6.92659e-135	-0.500474	0.129	0.743	2.32304e-130	TULP4	DOWN
6.98879e-135	-0.601042	0.14	0.763	2.3439e-130	DLEU2	DOWN
8.61345e-135	-0.504432	0.07	0.607	2.88878e-130	TBC1D32	DOWN
1.86779e-134	-0.30268	0.064	0.594	6.26419e-130	NUP160	DOWN
1.87682e-134	-0.344155	0.093	0.661	6.29449e-130	ASXL1	DOWN
2.46169e-134	-0.328514	0.097	0.673	8.25601e-130	AVL9	DOWN
2.7875e-134	-0.566755	0.05	0.556	9.34872e-130	AC139887.2	DOWN
2.93093e-134	-0.90666	0.256	0.945	9.82975e-130	GPHN	DOWN
3.27818e-134	-0.428055	0.09	0.651	1.09944e-129	FAM208B	DOWN
7.25925e-134	-0.794598	0.199	0.873	2.43461e-129	TRPS1	DOWN
7.42446e-134	-0.595003	0.077	0.62	2.49002e-129	INVS	DOWN
7.94299e-134	-0.59338	0.061	0.58	2.66392e-129	DENND2A	DOWN
8.62895e-134	-0.307945	0.082	0.633	2.89398e-129	HMBOX1	DOWN
1.0468e-133	-0.253887	0.101	0.679	3.51075e-129	SLMAP	DOWN
1.15641e-133	-0.930867	0.165	0.793	3.87835e-129	PTPRG	DOWN
1.20583e-133	-0.322636	0.137	0.764	4.04411e-129	RAB7A	DOWN
1.59994e-133	-0.887742	0.063	0.582	5.36587e-129	MYO1E	DOWN
2.47183e-133	-0.752384	0.044	0.538	8.29003e-129	CEP83	DOWN
2.79846e-133	-0.631088	0.089	0.645	9.38549e-129	GRID1	DOWN
5.18321e-133	-0.348374	0.112	0.703	1.73834e-128	PAN3	DOWN
5.27198e-133	-1.11022	0.107	0.666	1.76812e-128	MDM2	DOWN
6.19171e-133	-0.671533	0.106	0.682	2.07657e-128	TLN2	DOWN
7.13632e-133	-0.876113	0.221	0.895	2.39338e-128	NFIB	DOWN
1.40508e-132	-0.449238	0.052	0.558	4.71235e-128	THUMPD3-AS1	DOWN
2.37411e-132	-0.470324	0.057	0.568	7.96229e-128	RIC8B	DOWN
2.37428e-132	-0.306209	0.057	0.57	7.96287e-128	INO80	DOWN
2.58765e-132	-0.878342	0.084	0.623	8.67846e-128	SLC22A23	DOWN
3.10218e-132	-0.626245	0.154	0.786	1.04041e-127	BTBD9	DOWN
3.61536e-132	-0.278193	0.11	0.697	1.21252e-127	CNOT2	DOWN
3.86616e-132	-0.294301	0.128	0.74	1.29663e-127	ZNF644	DOWN
3.87069e-132	-0.251181	0.107	0.687	1.29815e-127	VPS8	DOWN
4.90919e-132	-0.552582	0.056	0.564	1.64645e-127	KIF9-AS1	DOWN
5.02576e-132	-0.354601	0.073	0.609	1.68554e-127	ANKRD26	DOWN
5.37777e-132	-0.331385	0.116	0.711	1.8036e-127	CTNNA1	DOWN
6.54748e-132	-0.250763	0.089	0.645	2.1959e-127	LSM14A	DOWN
6.88451e-132	-0.288543	0.077	0.618	2.30893e-127	AK3	DOWN
6.91086e-132	-0.708652	0.033	0.51	2.31776e-127	SRBD1	DOWN
8.02804e-132	-0.414864	0.05	0.55	2.69244e-127	ARMC8	DOWN
8.69466e-132	-0.354525	0.052	0.556	2.91602e-127	SMARCAD1	DOWN
9.64758e-132	-0.426847	0.069	0.596	3.23561e-127	SENP5	DOWN
1.25911e-131	-0.412929	0.068	0.593	4.22279e-127	GALNT11	DOWN
1.49399e-131	-0.292049	0.128	0.738	5.01055e-127	ANKIB1	DOWN
1.74111e-131	-1.09227	0.062	0.572	5.83934e-127	JARID2	DOWN
2.10603e-131	-0.322048	0.079	0.62	7.06321e-127	DPY19L3	DOWN
2.12471e-131	-0.567255	0.202	0.897	7.12584e-127	MED13L	DOWN
2.44646e-131	-0.720553	0.032	0.505	8.20494e-127	GNG12	DOWN
2.62104e-131	-0.879671	0.069	0.589	8.79045e-127	MED12L	DOWN
3.11558e-131	-0.273544	0.079	0.619	1.0449e-126	ZFC3H1	DOWN
3.14849e-131	-1.37595	0.237	0.822	1.05594e-126	CADPS	DOWN
3.35234e-131	-0.430216	0.11	0.69	1.12431e-126	LRRFIP2	DOWN
3.49694e-131	-0.282304	0.093	0.654	1.1728e-126	ABL1	DOWN
3.84395e-131	-0.411793	0.103	0.674	1.28918e-126	SIK2	DOWN
3.85742e-131	-0.539918	0.053	0.555	1.2937e-126	USP3	DOWN
3.90933e-131	-0.492513	0.061	0.574	1.31111e-126	ADGRA3	DOWN
4.79301e-131	-0.857786	0.054	0.558	1.60748e-126	IQGAP2	DOWN
6.12602e-131	-0.302845	0.081	0.623	2.05454e-126	PTPN12	DOWN
6.39392e-131	-0.399011	0.073	0.607	2.14439e-126	TDRD3	DOWN
6.57882e-131	-0.259163	0.102	0.674	2.20641e-126	CTTN	DOWN
6.66871e-131	-0.479686	0.052	0.554	2.23655e-126	NFATC3	DOWN
8.34667e-131	-0.299956	0.102	0.674	2.79931e-126	TAF1D	DOWN
1.00163e-130	-0.539305	0.123	0.711	3.35927e-126	BCAS3	DOWN
1.04936e-130	-0.460065	0.038	0.518	3.51934e-126	PMS1	DOWN
1.20184e-130	-0.342335	0.152	0.788	4.03072e-126	FNDC3A	DOWN
1.74832e-130	-0.301343	0.067	0.589	5.86352e-126	AKAP10	DOWN
1.81692e-130	-0.453328	0.041	0.525	6.09357e-126	IFT43	DOWN
2.12773e-130	-0.411723	0.139	0.756	7.13599e-126	FER	DOWN
2.25316e-130	-0.300991	0.075	0.609	7.55666e-126	RPAP2	DOWN
2.39572e-130	-0.632226	0.056	0.561	8.03476e-126	DPH6	DOWN
2.48774e-130	-0.442992	0.064	0.58	8.34338e-126	SHLD2	DOWN
2.73299e-130	-0.521727	0.075	0.606	9.1659e-126	SNX29	DOWN
3.5339e-130	-1.04415	0.042	0.524	1.1852e-125	SNCAIP	DOWN
4.0557e-130	-0.403294	0.088	0.637	1.3602e-125	SPATS2L	DOWN
4.29065e-130	-0.330324	0.075	0.608	1.439e-125	PPP2R5C	DOWN
5.7393e-130	-0.342825	0.084	0.629	1.92485e-125	TBCD	DOWN
7.19734e-130	-0.858626	0.032	0.501	2.41384e-125	MGMT	DOWN
8.03428e-130	-0.259285	0.111	0.693	2.69454e-125	ARNT2	DOWN
9.3619e-130	-0.368105	0.074	0.606	3.1398e-125	RFX7	DOWN
9.60427e-130	-0.300132	0.187	0.871	3.22108e-125	USP34	DOWN
1.33222e-129	-0.540245	0.129	0.729	4.46799e-125	PAM	DOWN
1.37066e-129	-0.477519	0.088	0.638	4.5969e-125	ZDHHC21	DOWN
2.1092e-129	-0.754255	0.223	0.912	7.07384e-125	ERBIN	DOWN
2.55611e-129	-0.530974	0.082	0.62	8.57268e-125	TRIM24	DOWN
2.63337e-129	0.408463	0.089	0.639	8.83181e-125	CSNK2A1	UP
3.2779e-129	-0.279299	0.058	0.564	1.09934e-124	H2AFY	DOWN
3.56238e-129	-0.834057	0.101	0.651	1.19475e-124	OPHN1	DOWN
7.46998e-129	-0.426472	0.092	0.642	2.50528e-124	ATP6V1H	DOWN
7.95441e-129	-0.349601	0.071	0.593	2.66775e-124	ZNF83	DOWN
9.03033e-129	-0.374943	0.076	0.607	3.02859e-124	CHD1	DOWN
9.24652e-129	-0.471901	0.047	0.534	3.1011e-124	ANAPC1	DOWN
1.08819e-128	-0.818932	0.047	0.534	3.64958e-124	RGS20	DOWN
1.09418e-128	-0.531639	0.036	0.507	3.66965e-124	RNF169	DOWN
1.22697e-128	-0.338644	0.062	0.573	4.115e-124	MAP3K7	DOWN
1.2771e-128	-0.49694	0.057	0.558	4.28313e-124	GPD2	DOWN
1.39796e-128	-0.267433	0.089	0.637	4.68846e-124	DMTF1	DOWN
1.50598e-128	-0.280854	0.095	0.65	5.05074e-124	CCSER2	DOWN
1.94599e-128	-0.846876	0.037	0.508	6.52647e-124	BACE2	DOWN
2.32069e-128	-0.405627	0.04	0.519	7.78313e-124	NBPF15	DOWN
2.75887e-128	-0.481224	0.049	0.537	9.25269e-124	PSMD14	DOWN
3.06572e-128	-0.368982	0.129	0.729	1.02818e-123	FNBP1	DOWN
3.51276e-128	-0.307992	0.116	0.697	1.17811e-123	ELF2	DOWN
3.61339e-128	-0.364165	0.056	0.556	1.21186e-123	TANK	DOWN
3.71753e-128	-0.737256	0.029	0.49	1.24679e-123	PAWR	DOWN
4.45944e-128	-0.586316	0.068	0.581	1.49561e-123	CRADD	DOWN
4.50766e-128	-0.2753	0.063	0.574	1.51178e-123	DIP2A	DOWN
5.28397e-128	-0.769247	0.046	0.529	1.77214e-123	ZNF521	DOWN
5.86911e-128	-0.81076	0.039	0.512	1.96838e-123	AC104596.1	DOWN
5.95575e-128	-0.32059	0.125	0.72	1.99744e-123	ARHGAP32	DOWN
6.79858e-128	-0.28355	0.079	0.61	2.28011e-123	INPP4A	DOWN
7.2831e-128	-0.293377	0.073	0.597	2.44261e-123	HMGN1	DOWN
8.82698e-128	-0.283653	0.182	0.855	2.96039e-123	KMT2E	DOWN
1.01307e-127	-0.264912	0.064	0.576	3.39764e-123	TTC14	DOWN
1.15899e-127	-0.580516	0.163	0.788	3.88703e-123	LINC00461	DOWN
1.24203e-127	-0.545345	0.048	0.534	4.16553e-123	ZRANB3	DOWN
1.446e-127	-0.421556	0.055	0.551	4.84959e-123	RNF111	DOWN
1.70565e-127	-0.487802	0.057	0.554	5.72041e-123	PPA2	DOWN
1.82858e-127	-0.389545	0.062	0.57	6.13268e-123	XPO4	DOWN
2.07682e-127	-0.623604	0.088	0.627	6.96523e-123	GMDS	DOWN
2.22913e-127	-0.34092	0.057	0.556	7.47605e-123	GPR107	DOWN
2.28539e-127	-1.05478	0.017	0.458	7.66475e-123	SNTB1	DOWN
2.3671e-127	-0.37026	0.183	0.854	7.93877e-123	RALGAPA1	DOWN
2.79441e-127	-0.5546	0.109	0.677	9.37189e-123	JAKMIP2	DOWN
4.94442e-127	-0.40633	0.058	0.557	1.65826e-122	STAT5B	DOWN
5.42452e-127	-0.374266	0.066	0.576	1.81927e-122	ATR	DOWN
7.46712e-127	-0.580268	0.054	0.547	2.50432e-122	ZNF827	DOWN
7.74946e-127	-1.14383	0.06	0.549	2.59902e-122	LINC00511	DOWN
8.03732e-127	-0.337005	0.189	0.859	2.69556e-122	GOLGA4	DOWN
8.15638e-127	-0.489591	0.073	0.593	2.73549e-122	STK39	DOWN
8.55155e-127	-0.734343	0.189	0.835	2.86802e-122	TRIM9	DOWN
1.22556e-126	-0.963375	0.119	0.68	4.11027e-122	CNTNAP3B	DOWN
1.33601e-126	-0.640984	0.039	0.509	4.48072e-122	YBX3	DOWN
1.59156e-126	-0.418362	0.051	0.539	5.33779e-122	CCDC14	DOWN
1.63771e-126	-0.575819	0.073	0.593	5.49257e-122	LIMS1	DOWN
1.8005e-126	-0.556378	0.041	0.516	6.03851e-122	RFX2	DOWN
1.9656e-126	-0.344057	0.204	0.902	6.59224e-122	ANKRD11	DOWN
2.01725e-126	-0.291407	0.08	0.609	6.76545e-122	ATF7IP	DOWN
2.81363e-126	-0.461541	0.038	0.505	9.43637e-122	NSUN6	DOWN
3.8162e-126	-0.641168	0.056	0.548	1.27988e-121	ZNF438	DOWN
3.92728e-126	-0.381065	0.042	0.516	1.31713e-121	WDR11	DOWN
5.13561e-126	-0.256295	0.134	0.736	1.72238e-121	TAOK3	DOWN
5.40144e-126	-0.457649	0.046	0.526	1.81153e-121	KIAA0355	DOWN
5.52413e-126	-0.292291	0.151	0.775	1.85268e-121	FBXO11	DOWN
5.83583e-126	-0.82634	0.096	0.637	1.95722e-121	NLGN4X	DOWN
7.1321e-126	-0.411966	0.066	0.573	2.39196e-121	CAPN2	DOWN
7.487e-126	-0.280895	0.099	0.653	2.51099e-121	MAST2	DOWN
8.30053e-126	-1.00615	0.087	0.609	2.78383e-121	STARD13	DOWN
9.68107e-126	-0.32844	0.064	0.57	3.24684e-121	ATAD2B	DOWN
1.2437e-125	-0.316518	0.09	0.631	4.17113e-121	GPATCH2L	DOWN
1.30365e-125	-0.483806	0.081	0.608	4.37217e-121	KIAA1328	DOWN
1.40438e-125	-0.540705	0.046	0.522	4.71001e-121	POLA1	DOWN
1.56359e-125	-0.9536	0.274	0.947	5.24397e-121	FMNL2	DOWN
1.58828e-125	-1.22091	0.097	0.622	5.32678e-121	PTCHD1-AS	DOWN
1.76003e-125	-0.281096	0.07	0.582	5.9028e-121	KATNBL1	DOWN
1.7698e-125	-0.318079	0.066	0.573	5.93557e-121	AGO2	DOWN
2.10285e-125	-0.309599	0.109	0.674	7.05254e-121	ITSN1	DOWN
2.63321e-125	-0.281003	0.092	0.635	8.83127e-121	AC118549.1	DOWN
2.82972e-125	-0.668245	0.046	0.522	9.4903e-121	LAMC1	DOWN
3.42527e-125	-0.250693	0.08	0.606	1.14877e-120	EXOC1	DOWN
3.5883e-125	-0.403978	0.067	0.576	1.20345e-120	URI1	DOWN
5.70851e-125	-0.530469	0.033	0.492	1.91452e-120	PARN	DOWN
6.3142e-125	-0.323018	0.083	0.611	2.11765e-120	PSPC1	DOWN
7.29365e-125	-0.506971	0.106	0.659	2.44615e-120	ZMYND8	DOWN
7.43588e-125	-0.53931	0.129	0.715	2.49384e-120	FBXL17	DOWN
9.54786e-125	-0.578936	0.044	0.516	3.20216e-120	MIRLET7BHG	DOWN
1.10124e-124	-0.703642	0.209	0.868	3.69333e-120	RFX3	DOWN
1.18088e-124	-0.343421	0.099	0.649	3.96044e-120	CAST	DOWN
1.38158e-124	-0.58332	0.021	0.46	4.63354e-120	TTC27	DOWN
1.42013e-124	-0.261636	0.139	0.743	4.76284e-120	FRYL	DOWN
1.97e-124	-0.447378	0.051	0.533	6.60699e-120	MSH3	DOWN
2.14594e-124	-0.456031	0.065	0.567	7.19705e-120	NOL10	DOWN
2.26847e-124	-0.45007	0.102	0.653	7.60799e-120	SREBF2	DOWN
2.47357e-124	-0.336742	0.154	0.781	8.29587e-120	GLG1	DOWN
2.64765e-124	-0.389292	0.044	0.517	8.87967e-120	EPG5	DOWN
3.38656e-124	-0.418226	0.052	0.536	1.13579e-119	SLC25A37	DOWN
3.43109e-124	-0.310147	0.148	0.763	1.15072e-119	GSK3B	DOWN
3.54531e-124	-0.558897	0.047	0.523	1.18903e-119	PLEKHG1	DOWN
4.13769e-124	-0.298808	0.07	0.579	1.3877e-119	RBMX	DOWN
4.2019e-124	-0.251209	0.069	0.576	1.40923e-119	WDR59	DOWN
4.87187e-124	-0.568993	0.058	0.548	1.63393e-119	HS2ST1	DOWN
5.00847e-124	-0.40233	0.208	0.904	1.67974e-119	ZNF638	DOWN
6.03961e-124	-1.25395	0.116	0.649	2.02557e-119	2023-03-03	DOWN
6.28515e-124	-0.518095	0.028	0.476	2.10791e-119	ARFIP1	DOWN
6.5075e-124	-0.441701	0.062	0.557	2.18249e-119	IFT88	DOWN
6.75003e-124	-0.559223	0.065	0.563	2.26383e-119	TRAK2	DOWN
8.56238e-124	-0.804862	0.036	0.493	2.87165e-119	VCL	DOWN
8.99193e-124	-0.290668	0.078	0.598	3.01571e-119	NUTM2B-AS1	DOWN
1.08386e-123	-0.419071	0.096	0.637	3.63505e-119	TIAM2	DOWN
1.22844e-123	-0.315362	0.071	0.58	4.11996e-119	SENP7	DOWN
1.2819e-123	-0.289328	0.188	0.859	4.29925e-119	UBR5	DOWN
1.58683e-123	-0.673259	0.029	0.478	5.3219e-119	LINC00854	DOWN
1.60058e-123	-0.69428	0.089	0.614	5.36802e-119	SIPA1L2	DOWN
2.0533e-123	-0.565586	0.08	0.598	6.88635e-119	ZHX3	DOWN
3.00091e-123	-0.27403	0.091	0.627	1.00645e-118	RNF115	DOWN
3.17646e-123	-0.435027	0.059	0.548	1.06532e-118	THOC1	DOWN
3.73297e-123	-0.539077	0.137	0.728	1.25196e-118	LARGE1	DOWN
5.15368e-123	-0.3311	0.061	0.554	1.72844e-118	AQR	DOWN
9.44634e-123	-0.51366	0.028	0.474	3.16811e-118	PRPF3	DOWN
1.00383e-122	-0.488948	0.042	0.508	3.36666e-118	ARHGEF11	DOWN
1.06406e-122	-0.501872	0.067	0.567	3.56863e-118	RASA2	DOWN
1.09779e-122	-0.557453	0.225	0.927	3.68177e-118	PTK2	DOWN
1.25093e-122	-0.27855	0.073	0.584	4.19535e-118	RB1	DOWN
1.57652e-122	-0.579674	0.082	0.599	5.28732e-118	KAT2B	DOWN
1.62764e-122	-0.805439	0.073	0.574	5.45878e-118	WWTR1	DOWN
1.6866e-122	-0.322835	0.057	0.544	5.65652e-118	SRSF4	DOWN
1.75e-122	-0.347683	0.073	0.58	5.86914e-118	SRP54	DOWN
2.17756e-122	-0.402711	0.147	0.754	7.3031e-118	ENAH	DOWN
3.11201e-122	-0.276985	0.06	0.549	1.0437e-117	NPLOC4	DOWN
4.227e-122	-0.275774	0.095	0.633	1.41765e-117	CHKA	DOWN
4.34214e-122	-0.670413	0.018	0.447	1.45627e-117	WDR25	DOWN
5.64973e-122	-0.398246	0.066	0.563	1.89481e-117	SLC20A2	DOWN
6.02708e-122	-0.369785	0.035	0.488	2.02136e-117	PLCG1	DOWN
7.23154e-122	-0.319538	0.078	0.592	2.42531e-117	SAMD4B	DOWN
7.98483e-122	-0.344292	0.062	0.554	2.67795e-117	IWS1	DOWN
8.1837e-122	-0.500865	0.143	0.737	2.74465e-117	PALLD	DOWN
8.22279e-122	-0.344777	0.092	0.624	2.75776e-117	ENSA	DOWN
1.10163e-121	-0.368658	0.08	0.595	3.69465e-117	RICTOR	DOWN
1.12203e-121	-0.403828	0.193	0.859	3.76308e-117	DIP2B	DOWN
1.31604e-121	-0.442572	0.05	0.521	4.41373e-117	GABPB1-AS1	DOWN
1.54856e-121	-0.339292	0.046	0.513	5.19357e-117	SPTLC1	DOWN
1.68954e-121	-0.611559	0.198	0.85	5.66637e-117	MBD5	DOWN
2.23669e-121	-0.997098	0.076	0.575	7.50142e-117	ESRRG	DOWN
2.33987e-121	-0.452931	0.052	0.527	7.84745e-117	CDKL3	DOWN
2.60624e-121	-0.366852	0.073	0.575	8.74081e-117	SIL1	DOWN
3.562e-121	-0.473702	0.051	0.525	1.19462e-116	PSMG2	DOWN
4.43606e-121	-0.295667	0.058	0.542	1.48776e-116	PTCD3	DOWN
4.53165e-121	-0.272148	0.073	0.576	1.51982e-116	SMG7	DOWN
5.77488e-121	-0.519201	0.023	0.456	1.93678e-116	PPWD1	DOWN
7.46156e-121	-0.368266	0.071	0.572	2.50246e-116	CFDP1	DOWN
8.09659e-121	-0.466161	0.051	0.523	2.71544e-116	ME3	DOWN
8.26289e-121	-1.02182	0.207	0.805	2.77121e-116	IMMP2L	DOWN
9.92475e-121	-0.438368	0.202	0.869	3.32856e-116	SRPK2	DOWN
1.00534e-120	-0.443913	0.038	0.492	3.37171e-116	ABCB7	DOWN
1.09055e-120	-0.377587	0.044	0.508	3.65748e-116	EIF2S3	DOWN
2.4653e-120	-0.364715	0.057	0.537	8.26812e-116	TASP1	DOWN
2.55461e-120	0.267045	0.039	0.494	8.56765e-116	TYW1B	UP
2.65067e-120	-0.901162	0.098	0.623	8.88983e-116	NTNG1	DOWN
3.26422e-120	-0.595332	0.098	0.631	1.09476e-115	ASTN1	DOWN
4.01215e-120	-0.464998	0.1	0.635	1.34559e-115	FGFR1	DOWN
6.89265e-120	-0.312505	0.062	0.549	2.31166e-115	RARS2	DOWN
7.58995e-120	-0.557668	0.048	0.512	2.54552e-115	HLCS	DOWN
9.62958e-120	-0.251863	0.094	0.623	3.22957e-115	UVRAG	DOWN
1.1511e-119	-0.250218	0.109	0.66	3.86054e-115	CMIP	DOWN
1.26922e-119	-0.666795	0.046	0.506	4.25672e-115	KIAA1671	DOWN
1.31442e-119	-0.34833	0.062	0.548	4.40829e-115	CEP290	DOWN
1.36338e-119	-0.97777	0.23	0.85	4.57251e-115	MEIS2	DOWN
1.36494e-119	-0.512549	0.089	0.609	4.57772e-115	APBB2	DOWN
1.44087e-119	-0.554942	0.039	0.492	4.83239e-115	TRIM4	DOWN
1.54049e-119	-0.43104	0.115	0.669	5.16648e-115	UTRN	DOWN
1.56353e-119	-0.296662	0.086	0.605	5.24378e-115	ATE1	DOWN
2.11427e-119	-0.383116	0.042	0.5	7.09083e-115	TRAPPC11	DOWN
2.29236e-119	-0.380911	0.053	0.525	7.68812e-115	KCTD3	DOWN
2.47787e-119	-0.363065	0.049	0.515	8.31028e-115	MTA3	DOWN
2.49099e-119	-0.364069	0.043	0.501	8.35428e-115	ASXL2	DOWN
2.51475e-119	-0.339877	0.057	0.535	8.43397e-115	RYK	DOWN
2.89613e-119	-0.412259	0.095	0.621	9.71305e-115	TANC1	DOWN
3.48066e-119	-0.291627	0.053	0.524	1.16734e-114	TPP2	DOWN
3.61772e-119	-0.400586	0.036	0.483	1.21331e-114	ELP3	DOWN
3.91991e-119	-0.653177	0.031	0.471	1.31466e-114	GLI3	DOWN
5.06769e-119	-0.304224	0.068	0.56	1.6996e-114	ARIH2	DOWN
7.17163e-119	-0.502665	0.057	0.532	2.40522e-114	GATAD2A	DOWN
7.45689e-119	-0.76009	0.017	0.434	2.50089e-114	ATP6AP1L	DOWN
9.22771e-119	-0.288586	0.057	0.534	3.09479e-114	GON4L	DOWN
9.23437e-119	-0.272426	0.075	0.576	3.09702e-114	UBAP2	DOWN
9.90928e-119	-0.366391	0.052	0.522	3.32338e-114	SLC16A9	DOWN
1.61036e-118	-0.290496	0.102	0.637	5.40084e-114	HDAC4	DOWN
1.79413e-118	-0.433926	0.038	0.484	6.01714e-114	UNK	DOWN
2.71177e-118	-0.618021	0.053	0.521	9.09475e-114	NDUFAF2	DOWN
3.09944e-118	-0.418838	0.035	0.478	1.03949e-113	DZIP1	DOWN
3.27983e-118	-0.267336	0.083	0.593	1.09999e-113	NBEAL1	DOWN
3.35532e-118	-0.557273	0.023	0.448	1.12531e-113	MYO19	DOWN
3.40369e-118	-0.710716	0.19	0.81	1.14153e-113	ITPR2	DOWN
3.62205e-118	-0.41226	0.058	0.534	1.21476e-113	DCUN1D4	DOWN
4.2259e-118	-1.18292	0.089	0.587	1.41728e-113	NAALADL2	DOWN
4.29545e-118	-0.415972	0.029	0.464	1.44061e-113	ECHDC2	DOWN
5.92995e-118	-0.739535	0.051	0.513	1.98879e-113	RANBP17	DOWN
6.89726e-118	-1.0285	0.031	0.465	2.3132e-113	ADAMTS9-AS2	DOWN
1.53468e-117	-0.324344	0.056	0.528	5.147e-113	UQCRC2	DOWN
1.92475e-117	-0.700704	0.171	0.769	6.45524e-113	PRKN	DOWN
2.27823e-117	-0.717716	0.037	0.479	7.64073e-113	TMEM164	DOWN
2.35698e-117	-1.05265	0.153	0.713	7.90482e-113	CASC15	DOWN
3.04268e-117	-0.382144	0.075	0.572	1.02045e-112	CREM	DOWN
3.05251e-117	-0.486168	0.044	0.496	1.02375e-112	NEK11	DOWN
3.67304e-117	-0.397759	0.15	0.734	1.23186e-112	VMP1	DOWN
4.20397e-117	-0.313027	0.09	0.607	1.40993e-112	FBXL20	DOWN
5.16748e-117	-0.411071	0.093	0.609	1.73307e-112	RHOBTB3	DOWN
6.27938e-117	-0.260625	0.07	0.56	2.10598e-112	TNPO3	DOWN
6.52385e-117	-0.461411	0.047	0.504	2.18797e-112	TMEM135	DOWN
9.73554e-117	-0.394212	0.085	0.593	3.26511e-112	OSBPL6	DOWN
1.02489e-116	-0.253377	0.06	0.534	3.43727e-112	EIF3E	DOWN
1.17059e-116	-0.258443	0.084	0.591	3.92592e-112	SLC35F5	DOWN
1.33851e-116	-0.326385	0.068	0.553	4.48908e-112	RAB11FIP3	DOWN
1.75174e-116	-0.258886	0.06	0.533	5.87499e-112	CABIN1	DOWN
2.03293e-116	-0.654395	0.067	0.548	6.81804e-112	DOK5	DOWN
2.34576e-116	-0.380853	0.049	0.506	7.86722e-112	ALMS1	DOWN
2.8785e-116	-0.408518	0.048	0.504	9.65391e-112	WDR43	DOWN
3.73485e-116	-0.254763	0.07	0.558	1.25259e-111	SLF2	DOWN
3.76773e-116	-0.821977	0.009	0.406	1.26362e-111	LINC00513	DOWN
3.84247e-116	-0.497135	0.039	0.48	1.28869e-111	PMM2	DOWN
4.23369e-116	-0.285815	0.095	0.614	1.4199e-111	WTAP	DOWN
4.65697e-116	-0.380397	0.169	0.786	1.56185e-111	AHI1	DOWN
5.84296e-116	-0.692675	0.031	0.462	1.95961e-111	RAI14	DOWN
6.44027e-116	-0.631861	0.079	0.571	2.15994e-111	NR3C2	DOWN
7.18196e-116	-0.364938	0.182	0.808	2.40869e-111	CAMTA1	DOWN
9.91104e-116	-0.52671	0.065	0.542	3.32397e-111	OTUD7B	DOWN
1.10192e-115	-0.401495	0.043	0.491	3.69563e-111	WASF3	DOWN
1.18555e-115	-0.29224	0.128	0.687	3.97611e-111	ABR	DOWN
1.19943e-115	-0.543622	0.037	0.474	4.02265e-111	KATNAL1	DOWN
1.23888e-115	-0.388156	0.062	0.534	4.15495e-111	CDK8	DOWN
1.39694e-115	-0.532838	0.039	0.48	4.68504e-111	CHIC2	DOWN
1.48381e-115	-1.01559	0.193	0.778	4.97639e-111	DCLK2	DOWN
1.92276e-115	-0.406114	0.04	0.483	6.44854e-111	PLEKHM1	DOWN
2.08998e-115	-0.565622	0.034	0.468	7.00937e-111	RBAK-RBAKDN	DOWN
2.69199e-115	-0.74394	0.101	0.617	9.0284e-111	ABCA1	DOWN
3.16249e-115	-0.315603	0.058	0.526	1.06064e-110	SMAD2	DOWN
3.3003e-115	-0.608078	0.221	0.874	1.10685e-110	AKT3	DOWN
4.38874e-115	-0.279491	0.067	0.548	1.47189e-110	DCAF10	DOWN
5.34284e-115	-0.381515	0.121	0.67	1.79188e-110	EPN2	DOWN
6.42363e-115	-0.442987	0.037	0.474	2.15436e-110	RIC1	DOWN
7.76018e-115	-0.307505	0.196	0.854	2.60261e-110	WDFY3	DOWN
8.60141e-115	-0.355618	0.048	0.5	2.88474e-110	TRAPPC10	DOWN
9.63662e-115	-0.27632	0.064	0.538	3.23193e-110	WWP1	DOWN
1.24247e-114	-0.535703	0.15	0.727	4.167e-110	CDH2	DOWN
1.3018e-114	-0.281993	0.073	0.558	4.36596e-110	RNF38	DOWN
1.41226e-114	-0.706752	0.262	0.934	4.73645e-110	TCF12	DOWN
1.62547e-114	-0.335003	0.049	0.502	5.45149e-110	CRTC3	DOWN
1.78864e-114	-0.344596	0.039	0.479	5.99873e-110	TRMT11	DOWN
2.01797e-114	-0.669973	0.058	0.52	6.76786e-110	PELI2	DOWN
2.32713e-114	-0.604108	0.018	0.426	7.80474e-110	BEND7	DOWN
2.43703e-114	-0.445325	0.03	0.455	8.1733e-110	KLHDC4	DOWN
2.61131e-114	-0.377787	0.137	0.702	8.75782e-110	ARAP2	DOWN
2.61596e-114	-0.393375	0.038	0.474	8.77339e-110	WDR27	DOWN
5.17203e-114	-0.935156	0.046	0.489	1.73459e-109	DDR2	DOWN
5.56738e-114	-0.536868	0.048	0.498	1.86719e-109	LHFPL2	DOWN
6.45738e-114	-0.39003	0.049	0.499	2.16568e-109	SLC25A26	DOWN
6.57052e-114	-0.969288	0.071	0.542	2.20362e-109	CRIM1	DOWN
7.26414e-114	-0.684814	0.021	0.432	2.43625e-109	PTPN14	DOWN
8.90736e-114	-0.588356	0.038	0.472	2.98735e-109	GRB10	DOWN
8.9561e-114	-0.460938	0.04	0.479	3.0037e-109	IQCK	DOWN
1.1035e-113	-0.513598	0.028	0.446	3.70091e-109	TSEN2	DOWN
1.42642e-113	-0.286075	0.059	0.524	4.78393e-109	CBR4	DOWN
1.75718e-113	-0.38588	0.098	0.613	5.89322e-109	GAB1	DOWN
1.83727e-113	-0.293514	0.049	0.499	6.16183e-109	FAM193B	DOWN
2.01375e-113	-0.484971	0.039	0.476	6.75372e-109	SUCLG2	DOWN
2.59093e-113	-0.749182	0.122	0.653	8.68945e-109	CDH20	DOWN
3.12729e-113	-0.269247	0.053	0.51	1.04883e-108	LINC00623	DOWN
3.34012e-113	-0.490311	0.098	0.611	1.12021e-108	ZFPM2	DOWN
4.03883e-113	-0.525205	0.245	0.931	1.35454e-108	BIRC6	DOWN
7.76863e-113	-0.481941	0.064	0.534	2.60544e-108	ELF1	DOWN
1.00885e-112	-1.35393	0.34	0.875	3.38349e-108	GPC5	DOWN
1.16497e-112	-0.621497	0.222	0.862	3.90707e-108	HMGB1	DOWN
1.3788e-112	-0.432582	0.099	0.613	4.62423e-108	GTDC1	DOWN
1.46329e-112	-0.58402	0.023	0.433	4.90759e-108	ZNF274	DOWN
1.56199e-112	-0.295818	0.048	0.493	5.2386e-108	RSPRY1	DOWN
1.68705e-112	-0.310223	0.085	0.582	5.65804e-108	TSC22D2	DOWN
2.05092e-112	-0.438413	0.062	0.525	6.87838e-108	DAPK1	DOWN
2.21461e-112	-0.5167	0.039	0.471	7.42736e-108	LIN52	DOWN
2.59761e-112	-0.407631	0.164	0.762	8.71187e-108	PTPN13	DOWN
2.82116e-112	-0.259311	0.069	0.543	9.46159e-108	SSBP1	DOWN
3.21112e-112	-0.302607	0.078	0.565	1.07695e-107	WDFY2	DOWN
4.11013e-112	-0.535439	0.077	0.56	1.37845e-107	FOXO1	DOWN
5.39635e-112	-0.681174	0.045	0.483	1.80983e-107	ADCY9	DOWN
5.55098e-112	-0.440236	0.215	0.872	1.86169e-107	NF1	DOWN
6.59909e-112	-0.493762	0.028	0.445	2.2132e-107	PEX14	DOWN
7.22686e-112	-0.718776	0.047	0.486	2.42374e-107	CRB1	DOWN
7.26336e-112	-0.92845	0.054	0.502	2.43599e-107	CENPP	DOWN
9.03482e-112	-0.720297	0.018	0.419	3.0301e-107	SCGB2B2	DOWN
9.103e-112	-0.508461	0.158	0.738	3.05296e-107	PRKCE	DOWN
1.00371e-111	-0.372706	0.043	0.481	3.36623e-107	GTF2F2	DOWN
1.01183e-111	-0.517873	0.05	0.494	3.39347e-107	ATXN7L1	DOWN
1.20385e-111	-0.323289	0.043	0.48	4.03748e-107	PPP4R1	DOWN
1.37517e-111	-0.349368	0.047	0.488	4.61204e-107	LARS2	DOWN
1.42169e-111	-0.322549	0.046	0.487	4.76807e-107	RAB30-AS1	DOWN
1.63615e-111	-0.341306	0.036	0.462	5.48733e-107	SLC25A18	DOWN
1.70213e-111	-0.268569	0.051	0.497	5.70861e-107	DROSHA	DOWN
1.7224e-111	-0.464639	0.028	0.442	5.77657e-107	TFB1M	DOWN
2.0508e-111	-0.590249	0.047	0.488	6.87799e-107	PRAG1	DOWN
2.09244e-111	-1.16345	0.433	0.948	7.01762e-107	ADGRL3	DOWN
2.23959e-111	-0.376187	0.039	0.469	7.51115e-107	FKTN	DOWN
2.31071e-111	-0.26076	0.095	0.601	7.74966e-107	DNAJC1	DOWN
2.45325e-111	-0.475095	0.058	0.514	8.22771e-107	TRAF3	DOWN
2.7045e-111	-0.400157	0.052	0.501	9.07034e-107	ABHD18	DOWN
3.32638e-111	-0.31705	0.111	0.639	1.1156e-106	BBX	DOWN
3.96957e-111	-0.761593	0.185	0.774	1.33132e-106	TNIK	DOWN
4.52956e-111	-0.332215	0.086	0.579	1.51912e-106	BBS9	DOWN
4.57622e-111	-0.336172	0.044	0.48	1.53477e-106	HM13	DOWN
6.53289e-111	-0.293128	0.124	0.665	2.191e-106	FUT8	DOWN
6.7648e-111	-0.454417	0.033	0.453	2.26878e-106	RAD54L2	DOWN
8.66325e-111	-0.654746	0.251	0.925	2.90548e-106	SIK3	DOWN
9.91488e-111	-0.697452	0.021	0.423	3.32525e-106	PRIM2	DOWN
1.02801e-110	-0.420927	0.032	0.45	3.44774e-106	WDR35	DOWN
1.48555e-110	-0.404405	0.21	0.858	4.98222e-106	CDC42BPA	DOWN
1.61276e-110	-0.543262	0.033	0.452	5.40886e-106	PLSCR1	DOWN
1.90867e-110	-0.451103	0.145	0.709	6.40129e-106	SGIP1	DOWN
2.16522e-110	-0.317789	0.084	0.573	7.26171e-106	CEP85L	DOWN
2.23297e-110	-0.350858	0.101	0.612	7.48893e-106	MFHAS1	DOWN
2.24408e-110	-0.253356	0.047	0.486	7.52621e-106	TAF2	DOWN
2.8499e-110	-0.322718	0.051	0.496	9.55798e-106	KHDC4	DOWN
3.14875e-110	-0.334815	0.052	0.498	1.05603e-105	FAM66D	DOWN
5.63056e-110	-0.37894	0.051	0.494	1.88838e-105	TULP3	DOWN
6.33819e-110	-0.614078	0.148	0.707	2.1257e-105	TMEM178B	DOWN
7.99029e-110	-0.277307	0.06	0.516	2.67978e-105	OGDH	DOWN
8.14253e-110	-0.482439	0.229	0.854	2.73084e-105	AC016831.7	DOWN
9.06757e-110	-0.407226	0.057	0.506	3.04108e-105	FAM13A	DOWN
1.26695e-109	-0.299735	0.039	0.465	4.2491e-105	CEP89	DOWN
1.86664e-109	-0.524891	0.027	0.434	6.26032e-105	TP53	DOWN
1.93436e-109	-0.281604	0.052	0.496	6.48747e-105	ARMH4	DOWN
2.04354e-109	-0.379833	0.218	0.874	6.85363e-105	GNAQ	DOWN
2.25518e-109	-1.03734	0.036	0.452	7.56341e-105	AL357153.2	DOWN
2.55094e-109	-0.451859	0.028	0.438	8.55535e-105	OFD1	DOWN
3.49835e-109	-0.513042	0.016	0.404	1.17328e-104	AC105052.3	DOWN
3.91104e-109	-0.472888	0.019	0.414	1.31169e-104	NBPF26	DOWN
4.32681e-109	-0.495805	0.096	0.595	1.45113e-104	RNF150	DOWN
4.37414e-109	-0.354969	0.039	0.461	1.467e-104	TUBGCP3	DOWN
4.63414e-109	-0.449099	0.029	0.439	1.5542e-104	FBXW8	DOWN
5.30497e-109	-0.310323	0.049	0.486	1.77918e-104	EXT2	DOWN
5.58934e-109	-0.514768	0.037	0.457	1.87455e-104	LYRM4	DOWN
6.16582e-109	-0.425437	0.045	0.477	2.06789e-104	AL359915.2	DOWN
6.26567e-109	-0.502956	0.23	0.894	2.10138e-104	EIF4G3	DOWN
6.75789e-109	-0.893567	0.13	0.646	2.26646e-104	SLC7A11	DOWN
7.16202e-109	-0.641781	0.1	0.6	2.402e-104	KLF12	DOWN
7.87189e-109	-0.431454	0.163	0.735	2.64007e-104	PHLPP1	DOWN
9.45983e-109	-0.494101	0.028	0.434	3.17264e-104	DDX31	DOWN
1.03114e-108	-0.271028	0.048	0.484	3.45825e-104	QSER1	DOWN
1.03583e-108	-0.43282	0.035	0.452	3.47396e-104	AASS	DOWN
1.03845e-108	-0.274194	0.07	0.536	3.48276e-104	ITGB1	DOWN
1.04964e-108	-0.31377	0.038	0.458	3.52028e-104	SACM1L	DOWN
1.29706e-108	-0.34217	0.057	0.504	4.35009e-104	USP25	DOWN
1.78054e-108	-0.514302	0.042	0.468	5.97159e-104	LINC02062	DOWN
2.26052e-108	-0.4106	0.026	0.428	7.58133e-104	ZNF75A	DOWN
2.31958e-108	-0.397964	0.043	0.47	7.77942e-104	URB1	DOWN
2.37592e-108	-0.667423	0.062	0.512	7.96837e-104	DDAH1	DOWN
4.09887e-108	-0.511041	0.024	0.423	1.37468e-103	AAGAB	DOWN
5.01865e-108	-0.432839	0.052	0.491	1.68316e-103	DDX10	DOWN
5.07482e-108	-0.446342	0.117	0.638	1.70199e-103	SRGAP3	DOWN
5.64371e-108	-0.260535	0.163	0.744	1.89279e-103	MBNL1	DOWN
8.74532e-108	-0.392649	0.202	0.836	2.93301e-103	DOCK3	DOWN
9.30785e-108	-0.374667	0.044	0.471	3.12167e-103	PPP1CB	DOWN
1.07533e-107	-0.276581	0.044	0.47	3.60645e-103	NDUFS4	DOWN
1.1739e-107	-0.268844	0.067	0.525	3.93702e-103	ZFYVE9	DOWN
1.27639e-107	-0.336989	0.035	0.449	4.28076e-103	CEP164	DOWN
1.69537e-107	-1.04702	0.027	0.426	5.68592e-103	MIR4435-2HG	DOWN
1.77132e-107	-0.438856	0.032	0.442	5.94064e-103	USP6NL	DOWN
2.01842e-107	-0.320275	0.076	0.546	6.76937e-103	YARS	DOWN
2.16665e-107	-0.403393	0.026	0.426	7.2665e-103	TBC1D22B	DOWN
2.37233e-107	-0.282987	0.045	0.473	7.95631e-103	TACC2	DOWN
2.5e-107	-0.525401	0.027	0.428	8.38449e-103	AC079385.1	DOWN
2.53446e-107	-1.06299	0.292	0.86	8.50008e-103	SOX5	DOWN
2.54186e-107	-0.284623	0.062	0.514	8.52489e-103	WDR60	DOWN
2.5907e-107	-0.653246	0.29	0.957	8.68868e-103	JMJD1C	DOWN
2.66829e-107	-0.723818	0.043	0.466	8.94891e-103	PKNOX2	DOWN
3.40753e-107	-0.567145	0.055	0.494	1.14282e-102	CACHD1	DOWN
3.73122e-107	-0.491567	0.045	0.471	1.25138e-102	TAF3	DOWN
4.60381e-107	-1.05527	0.018	0.405	1.54403e-102	ADAMTS17	DOWN
5.25308e-107	-0.585099	0.028	0.431	1.76178e-102	ATP13A4	DOWN
5.5014e-107	-0.479566	0.053	0.49	1.84506e-102	RNF180	DOWN
6.35573e-107	-0.410799	0.059	0.503	2.13158e-102	FAM184A	DOWN
7.36416e-107	-0.401021	0.063	0.515	2.46979e-102	GTF2IRD1	DOWN
8.98134e-107	-0.266939	0.056	0.498	3.01216e-102	USPL1	DOWN
9.00212e-107	-0.368567	0.033	0.442	3.01913e-102	ZC3H14	DOWN
1.08247e-106	-0.26523	0.053	0.49	3.63038e-102	TRAPPC12	DOWN
1.16795e-106	-0.425734	0.214	0.847	3.91707e-102	SSBP2	DOWN
1.38624e-106	-0.416294	0.024	0.418	4.64918e-102	NBPF11	DOWN
1.39974e-106	-0.39275	0.047	0.474	4.69444e-102	TENT4A	DOWN
1.71568e-106	-0.295574	0.127	0.659	5.75404e-102	RGL1	DOWN
1.8072e-106	-0.373111	0.047	0.474	6.06098e-102	GLRX3	DOWN
2.56786e-106	-0.31341	0.041	0.46	8.61209e-102	EXOC2	DOWN
2.60827e-106	-0.451448	0.021	0.411	8.74761e-102	FKBP10	DOWN
2.81264e-106	-0.312078	0.03	0.434	9.43302e-102	POT1	DOWN
2.98113e-106	-0.516767	0.081	0.547	9.99811e-102	SDK1	DOWN
3.28818e-106	-0.628903	0.096	0.579	1.10279e-101	GAREM1	DOWN
4.20605e-106	-0.264351	0.054	0.491	1.41063e-101	VPS13A	DOWN
4.23081e-106	-0.502619	0.055	0.492	1.41893e-101	KIAA1958	DOWN
4.75232e-106	-0.523773	0.073	0.532	1.59383e-101	EEPD1	DOWN
4.85603e-106	-0.607127	0.037	0.448	1.62861e-101	ATG10	DOWN
6.88792e-106	-0.414942	0.04	0.456	2.31007e-101	EPB41L5	DOWN
1.01462e-105	-0.257355	0.05	0.478	3.40283e-101	KPNA3	DOWN
1.14639e-105	-0.482772	0.126	0.648	3.84477e-101	FIGN	DOWN
1.2468e-105	-0.369461	0.046	0.47	4.18151e-101	MTHFD2L	DOWN
1.43245e-105	-0.655376	0.143	0.679	4.80414e-101	ADCY2	DOWN
1.74779e-105	-0.361132	0.035	0.443	5.86174e-101	PACRGL	DOWN
1.87247e-105	-0.411089	0.037	0.446	6.2799e-101	NUP107	DOWN
2.18181e-105	-0.463023	0.029	0.429	7.31737e-101	FBXO22	DOWN
2.2488e-105	-0.262501	0.06	0.503	7.54201e-101	KIAA0586	DOWN
2.53496e-105	-0.338836	0.039	0.45	8.50176e-101	METTL6	DOWN
2.8195e-105	-0.25199	0.036	0.444	9.45604e-101	DNASE1	DOWN
2.85045e-105	-0.477557	0.185	0.775	9.55985e-101	FMN2	DOWN
3.03459e-105	-0.614742	0.058	0.495	1.01774e-100	RFTN1	DOWN
3.10195e-105	-0.287059	0.042	0.46	1.04033e-100	ZNF431	DOWN
3.22755e-105	-0.616173	0.034	0.438	1.08246e-100	UBE3D	DOWN
3.40407e-105	-0.35696	0.039	0.452	1.14166e-100	GALK2	DOWN
3.53888e-105	-0.366488	0.028	0.426	1.18687e-100	CNOT10	DOWN
4.05929e-105	-0.846441	0.144	0.669	1.36141e-100	AFF3	DOWN
4.29296e-105	-0.465167	0.05	0.476	1.43977e-100	CORO2B	DOWN
4.70633e-105	-0.292891	0.074	0.534	1.57841e-100	LRRFIP1	DOWN
5.03478e-105	-0.259614	0.049	0.475	1.68857e-100	CCDC57	DOWN
6.32096e-105	-0.800167	0.101	0.581	2.11992e-100	HIP1	DOWN
6.61885e-105	-0.33887	0.04	0.455	2.21983e-100	SLAIN2	DOWN
7.27862e-105	-1.2787	0.343	0.885	2.4411e-100	PDE4B	DOWN
7.48699e-105	-0.262654	0.059	0.498	2.51099e-100	SUCO	DOWN
1.35219e-104	-0.286557	0.062	0.504	4.53498e-100	TLE1	DOWN
1.50755e-104	-0.555384	0.015	0.389	5.05603e-100	IFT172	DOWN
1.87227e-104	-0.485506	0.034	0.438	6.27921e-100	WNK3	DOWN
2.42604e-104	-0.321919	0.043	0.459	8.13645e-100	ACBD3	DOWN
2.44529e-104	-0.649118	0.023	0.409	8.20101e-100	HIBADH	DOWN
2.46164e-104	-0.251434	0.053	0.484	8.25584e-100	ATG2B	DOWN
2.57907e-104	-0.292192	0.099	0.591	8.64968e-100	MAP3K13	DOWN
2.68838e-104	-0.403397	0.039	0.448	9.01628e-100	SLC10A7	DOWN
3.3235e-104	-0.262741	0.062	0.503	1.11463e-99	ANKS1A	DOWN
3.90708e-104	-0.585224	0.028	0.42	1.31036e-99	SMAD3	DOWN
4.04569e-104	-0.871392	0.042	0.454	1.35684e-99	SPSB1	DOWN
4.11404e-104	-0.286123	0.132	0.665	1.37977e-99	HIVEP2	DOWN
5.14957e-104	-0.406509	0.034	0.436	1.72706e-99	FAM66C	DOWN
5.44618e-104	-0.347507	0.04	0.451	1.82654e-99	PRKAA2	DOWN
5.54392e-104	-0.495768	0.017	0.395	1.85932e-99	CLCN6	DOWN
6.41544e-104	-0.5482	0.052	0.478	2.15161e-99	MID1	DOWN
6.92288e-104	-0.752509	0.054	0.48	2.32179e-99	GALNT18	DOWN
9.93255e-104	-0.603221	0.107	0.595	3.33118e-99	BCL2	DOWN
1.48583e-103	-0.314288	0.033	0.433	4.98316e-99	NVL	DOWN
1.59092e-103	-0.316628	0.062	0.501	5.33561e-99	PPP3CC	DOWN
1.81318e-103	-0.346396	0.063	0.505	6.08103e-99	BCKDHB	DOWN
2.02364e-103	-0.334954	0.044	0.46	6.78687e-99	AC124319.2	DOWN
2.44671e-103	-0.256586	0.043	0.456	8.20578e-99	APTX	DOWN
3.21812e-103	-0.418353	0.026	0.413	1.07929e-98	AGK	DOWN
3.93304e-103	-0.347572	0.045	0.461	1.31906e-98	MARK4	DOWN
4.04164e-103	-1.02925	0.062	0.492	1.35548e-98	INPP4B	DOWN
4.50744e-103	-0.342367	0.04	0.45	1.5117e-98	GPR173	DOWN
5.78246e-103	-0.437443	0.028	0.416	1.93932e-98	PILRB	DOWN
5.8809e-103	-0.773903	0.065	0.504	1.97234e-98	TMTC1	DOWN
6.04937e-103	-0.948711	0.453	0.991	2.02884e-98	DST	DOWN
6.59219e-103	-0.374659	0.033	0.431	2.21089e-98	EFL1	DOWN
8.31138e-103	-0.283615	0.086	0.556	2.78747e-98	PKD2	DOWN
1.0671e-102	-0.441098	0.048	0.466	3.57883e-98	CNIH3	DOWN
1.14442e-102	-0.684989	0.14	0.661	3.83816e-98	SERPINE2	DOWN
1.17491e-102	-0.351752	0.059	0.491	3.94041e-98	PER3	DOWN
1.18669e-102	-0.498397	0.027	0.414	3.97992e-98	TNS1	DOWN
1.25493e-102	-0.337612	0.035	0.435	4.20877e-98	VAV2	DOWN
1.33391e-102	-0.286421	0.046	0.462	4.47367e-98	DGLUCY	DOWN
1.41947e-102	-0.650602	0.172	0.721	4.76063e-98	SCD5	DOWN
2.02321e-102	-0.292469	0.038	0.441	6.78545e-98	UIMC1	DOWN
3.37618e-102	-0.411255	0.034	0.43	1.1323e-97	HNRNPL	DOWN
4.75261e-102	-0.317773	0.031	0.424	1.59393e-97	MRPS31	DOWN
4.81849e-102	-0.295632	0.116	0.619	1.61602e-97	NFASC	DOWN
6.51169e-102	-0.335209	0.041	0.448	2.18389e-97	GPATCH2	DOWN
7.27363e-102	-0.365774	0.051	0.47	2.43943e-97	LINC01184	DOWN
1.50339e-101	-0.384308	0.076	0.529	5.04207e-97	GRAMD1B	DOWN
2.47209e-101	-0.274596	0.076	0.528	8.29088e-97	DIXDC1	DOWN
3.43017e-101	-0.304987	0.039	0.439	1.15041e-96	PNPT1	DOWN
3.7133e-101	-0.363177	0.073	0.52	1.24536e-96	ZDHHC14	DOWN
3.78664e-101	-0.606608	0.018	0.388	1.26996e-96	PCBD2	DOWN
3.79808e-101	-0.381488	0.029	0.417	1.2738e-96	HEATR1	DOWN
4.26092e-101	-0.62791	0.034	0.428	1.42903e-96	UBASH3B	DOWN
4.33479e-101	-0.296698	0.052	0.472	1.4538e-96	HADHB	DOWN
5.09441e-101	-0.445501	0.024	0.403	1.70856e-96	SLC35G2	DOWN
5.48148e-101	-0.782721	0.01	0.367	1.83838e-96	AP002026.1	DOWN
5.93584e-101	-0.647971	0.026	0.406	1.99076e-96	BOC	DOWN
6.0067e-101	-0.308588	0.059	0.486	2.01453e-96	PPP2R2D	DOWN
8.83108e-101	-0.74292	0.408	0.987	2.96177e-96	MACF1	DOWN
9.01394e-101	-0.305468	0.096	0.574	3.02309e-96	KAT6B	DOWN
1.47996e-100	-0.945073	0.028	0.411	4.96347e-96	FAM129A	DOWN
1.55428e-100	-0.351472	0.035	0.428	5.21274e-96	FGFR1OP	DOWN
1.57877e-100	-0.371586	0.244	0.902	5.29488e-96	NCOA1	DOWN
2.31746e-100	-0.25337	0.048	0.458	7.77231e-96	RAB11FIP2	DOWN
2.86922e-100	-0.295705	0.041	0.444	9.62279e-96	NSL1	DOWN
3.09283e-100	-0.313255	0.033	0.424	1.03727e-95	TMEM260	DOWN
3.60056e-100	-0.321111	0.048	0.458	1.20756e-95	RAB28	DOWN
3.64309e-100	-0.312981	0.034	0.426	1.22182e-95	MRPS25	DOWN
5.48444e-100	-0.556076	0.025	0.401	1.83937e-95	STX18-AS1	DOWN
8.78235e-100	-0.268772	0.033	0.422	2.94542e-95	MAU2	DOWN
9.87984e-100	-0.975719	0.028	0.407	3.3135e-95	AC099792.1	DOWN
1.0667e-99	-0.303335	0.037	0.431	3.57749e-95	GPALPP1	DOWN
1.30104e-99	-0.58954	0.185	0.746	4.36342e-95	PBX1	DOWN
2.56044e-99	-0.619204	0.263	0.911	8.5872e-95	MAP4K4	DOWN
2.6028e-99	-0.466653	0.017	0.379	8.72926e-95	NBPF14	DOWN
3.21518e-99	-0.657862	0.105	0.58	1.07831e-94	AC073050.1	DOWN
3.2554e-99	-0.294132	0.051	0.464	1.0918e-94	RILPL1	DOWN
3.46786e-99	-0.396488	0.038	0.431	1.16305e-94	EIF2B3	DOWN
3.90951e-99	-0.349608	0.039	0.434	1.31117e-94	BANP	DOWN
4.17576e-99	-0.289443	0.102	0.58	1.40047e-94	MBNL2	DOWN
4.30746e-99	0.703306	0.073	0.517	1.44464e-94	PIGN	UP
4.92167e-99	-0.29987	0.034	0.422	1.65063e-94	ABCD4	DOWN
5.17812e-99	-0.466433	0.045	0.448	1.73664e-94	ANKRD6	DOWN
5.45131e-99	-0.49583	0.029	0.41	1.82826e-94	MED6	DOWN
6.68523e-99	-0.278018	0.041	0.439	2.24209e-94	NEK9	DOWN
9.7181e-99	-0.422066	0.033	0.418	3.25926e-94	ANAPC10	DOWN
1.04685e-98	-0.420176	0.026	0.401	3.51094e-94	LDAH	DOWN
1.27343e-98	-0.427169	0.017	0.377	4.27084e-94	TTC23	DOWN
1.65613e-98	-0.400147	0.024	0.395	5.55432e-94	ST3GAL2	DOWN
2.39883e-98	-0.313338	0.046	0.449	8.0452e-94	ARMC9	DOWN
2.77734e-98	-0.474566	0.057	0.474	9.31465e-94	TFDP2	DOWN
3.86993e-98	-0.283426	0.054	0.468	1.2979e-93	ACTR3B	DOWN
4.08406e-98	-0.287791	0.04	0.435	1.36971e-93	MOK	DOWN
4.81345e-98	-0.356297	0.026	0.399	1.61433e-93	RAD52	DOWN
4.90281e-98	-0.347118	0.037	0.426	1.6443e-93	PLSCR4	DOWN
6.92083e-98	-0.279988	0.036	0.422	2.32111e-93	STK24	DOWN
6.93119e-98	-0.578356	0.035	0.419	2.32458e-93	KSR1	DOWN
7.89558e-98	-0.296021	0.135	0.649	2.64802e-93	CLIC4	DOWN
8.12516e-98	-0.385953	0.05	0.454	2.72501e-93	NRIP1	DOWN
9.92138e-98	-0.285098	0.08	0.525	3.32743e-93	ACTN2	DOWN
1.28923e-97	-0.746693	0.077	0.512	4.32384e-93	AKAP12	DOWN
1.3782e-97	-0.640671	0.041	0.434	4.6222e-93	AQP4-AS1	DOWN
1.44122e-97	-0.270385	0.036	0.422	4.83357e-93	TANGO6	DOWN
1.44953e-97	-0.620735	0.037	0.424	4.86143e-93	ABHD3	DOWN
1.47833e-97	-0.507745	0.032	0.412	4.95803e-93	PRTFDC1	DOWN
1.63332e-97	-0.88114	0.155	0.673	5.47783e-93	SYNE1	DOWN
2.31328e-97	-0.506205	0.012	0.362	7.75829e-93	AP003086.2	DOWN
2.895e-97	-0.411724	0.146	0.669	9.70926e-93	TSPAN5	DOWN
2.95137e-97	-0.419209	0.041	0.435	9.89829e-93	C15orf41	DOWN
2.9929e-97	-0.354221	0.256	0.926	1.00376e-92	KMT2C	DOWN
3.01397e-97	-0.768626	0.024	0.39	1.01083e-92	SUGCT	DOWN
3.20016e-97	-0.350862	0.058	0.474	1.07327e-92	SRGAP2	DOWN
3.29588e-97	-0.615737	0.053	0.46	1.10537e-92	WARS	DOWN
3.52081e-97	-1.1303	0.03	0.404	1.18081e-92	PKN2-AS1	DOWN
3.99397e-97	-0.29642	0.064	0.488	1.3395e-92	CEP112	DOWN
4.4598e-97	-0.333042	0.034	0.416	1.49573e-92	MAD1L1	DOWN
4.81826e-97	-0.254328	0.038	0.426	1.61595e-92	FBXW4	DOWN
5.58321e-97	-0.313573	0.034	0.416	1.8725e-92	HIC2	DOWN
5.82958e-97	-0.57169	0.032	0.411	1.95512e-92	PDGFC	DOWN
7.75349e-97	-0.517187	0.029	0.404	2.60037e-92	GALNT10	DOWN
8.7747e-97	-0.436894	0.017	0.373	2.94286e-92	ARL17A	DOWN
1.0826e-96	-0.421688	0.072	0.501	3.63083e-92	COBL	DOWN
1.09456e-96	-0.479397	0.015	0.366	3.67093e-92	ZSCAN5A	DOWN
1.19378e-96	-0.533906	0.024	0.39	4.0037e-92	LCLAT1	DOWN
1.22274e-96	-1.26444	0.035	0.412	4.10083e-92	ADAMTS9	DOWN
1.41942e-96	-0.916099	0.02	0.378	4.76044e-92	PRELID2	DOWN
1.56767e-96	-0.306158	0.039	0.428	5.25766e-92	PARP11	DOWN
1.63004e-96	-0.835249	0.047	0.444	5.46682e-92	DNAH7	DOWN
1.68511e-96	-0.342106	0.052	0.458	5.65153e-92	COL4A5	DOWN
1.70082e-96	-0.407053	0.032	0.41	5.70421e-92	ASCC1	DOWN
1.99646e-96	-0.424978	0.03	0.405	6.69572e-92	MTM1	DOWN
2.17536e-96	-0.571558	0.051	0.451	7.29572e-92	PLOD2	DOWN
2.37234e-96	-0.498392	0.057	0.469	7.95636e-92	CDHR3	DOWN
2.44326e-96	-0.540624	0.151	0.664	8.19419e-92	MAGI1	DOWN
2.5035e-96	-0.527187	0.199	0.772	8.39623e-92	PHACTR1	DOWN
2.6795e-96	-0.317671	0.062	0.482	8.98651e-92	PPP2R3A	DOWN
2.74835e-96	-0.337551	0.035	0.416	9.21743e-92	ANKAR	DOWN
2.79664e-96	-0.287192	0.048	0.447	9.37939e-92	MAX	DOWN
2.81258e-96	-0.348401	0.029	0.402	9.43282e-92	ZNF251	DOWN
3.31167e-96	-0.523482	0.014	0.363	1.11067e-91	ACP6	DOWN
3.42229e-96	-0.287506	0.028	0.4	1.14777e-91	NCK1	DOWN
4.14461e-96	-0.358104	0.049	0.449	1.39002e-91	MFAP3L	DOWN
4.31878e-96	-0.500137	0.023	0.386	1.44843e-91	SP110	DOWN
4.80513e-96	-0.278468	0.067	0.492	1.61154e-91	GARS	DOWN
5.57144e-96	-0.341464	0.035	0.415	1.86855e-91	NINL	DOWN
6.0108e-96	-0.266717	0.146	0.668	2.0159e-91	PPP1R9A	DOWN
6.01745e-96	-0.39042	0.033	0.411	2.01813e-91	OSMR	DOWN
6.48435e-96	-1.03226	0.028	0.395	2.17472e-91	KCNMB2-AS1	DOWN
6.68673e-96	-0.336058	0.028	0.396	2.2426e-91	TSTD2	DOWN
1.1455e-95	-0.356838	0.027	0.393	3.84176e-91	VPS26C	DOWN
1.16739e-95	-0.748341	0.088	0.528	3.9152e-91	XYLT1	DOWN
1.21725e-95	-0.546355	0.068	0.488	4.08243e-91	ZBTB16	DOWN
1.2433e-95	-0.282935	0.037	0.419	4.16977e-91	ZNF512	DOWN
1.54987e-95	-0.454439	0.038	0.42	5.19796e-91	CHSY1	DOWN
2.00962e-95	-0.578729	0.052	0.454	6.73985e-91	HOPX	DOWN
2.73521e-95	-0.264663	0.083	0.526	9.17335e-91	IFI16	DOWN
3.40632e-95	-0.553903	0.026	0.39	1.14241e-90	MKRN3	DOWN
4.67253e-95	-0.390393	0.031	0.402	1.56707e-90	AC074032.1	DOWN
4.9524e-95	-0.467953	0.047	0.44	1.66093e-90	EPB41L4A	DOWN
5.07522e-95	-0.544469	0.031	0.402	1.70213e-90	AC097376.2	DOWN
5.63728e-95	0.273754	0.129	0.634	1.89063e-90	CEP350	UP
7.85209e-95	-0.515909	0.11	0.578	2.63343e-90	FOXO3	DOWN
8.13093e-95	-0.318932	0.028	0.394	2.72695e-90	SLC30A6	DOWN
8.67082e-95	-0.473344	0.039	0.423	2.90802e-90	SMIM12	DOWN
9.11459e-95	-0.348783	0.035	0.411	3.05685e-90	MTMR12	DOWN
9.11926e-95	-0.347686	0.026	0.389	3.05842e-90	LIMD1	DOWN
1.29335e-94	-0.811815	0.022	0.379	4.33762e-90	VAV3	DOWN
1.3177e-94	-0.367277	0.046	0.438	4.41929e-90	RSU1	DOWN
1.60369e-94	-0.754623	0.343	0.956	5.37846e-90	FTX	DOWN
1.6076e-94	-0.473861	0.073	0.5	5.39156e-90	KLF7	DOWN
1.65307e-94	-0.501095	0.052	0.452	5.54406e-90	GULP1	DOWN
1.71887e-94	-0.38689	0.046	0.438	5.76476e-90	CNTLN	DOWN
2.05032e-94	-0.774177	0.012	0.353	6.87636e-90	LINC00299	DOWN
2.29885e-94	0.280009	0.18	0.759	7.7099e-90	AC124312.1	UP
2.39334e-94	-0.397599	0.153	0.673	8.0268e-90	RASAL2	DOWN
2.50872e-94	-0.271769	0.029	0.397	8.41376e-90	TAF1B	DOWN
3.01793e-94	-0.600291	0.045	0.434	1.01215e-89	ZFYVE28	DOWN
3.53627e-94	-0.257351	0.041	0.425	1.18599e-89	UBE3B	DOWN
5.04597e-94	-0.303494	0.027	0.389	1.69232e-89	CRLF3	DOWN
6.4173e-94	-1.14603	0.034	0.402	2.15223e-89	AC098829.1	DOWN
8.93967e-94	-0.306088	0.075	0.502	2.99819e-89	JAK1	DOWN
1.40436e-93	-0.275193	0.027	0.387	4.70994e-89	THUMPD2	DOWN
1.44235e-93	-0.359015	0.179	0.721	4.83737e-89	TMTC2	DOWN
1.60777e-93	-0.325784	0.061	0.469	5.39213e-89	ST5	DOWN
2.35112e-93	-0.346931	0.169	0.703	7.88519e-89	SIPA1L1	DOWN
3.14425e-93	-0.338426	0.041	0.423	1.05452e-88	ENOSF1	DOWN
3.84319e-93	-0.291319	0.036	0.409	1.28893e-88	ZNF680	DOWN
4.01426e-93	-0.401235	0.053	0.45	1.3463e-88	SULF2	DOWN
5.0636e-93	-0.385475	0.028	0.389	1.69823e-88	ZNF710	DOWN
6.12121e-93	-0.828012	0.055	0.451	2.05293e-88	PDE3A	DOWN
7.56513e-93	-0.296094	0.038	0.412	2.53719e-88	ETFA	DOWN
1.19318e-92	-0.293162	0.042	0.422	4.0017e-88	PARP14	DOWN
1.32384e-92	-0.814607	0.022	0.373	4.43991e-88	PRR5L	DOWN
1.52183e-92	-0.32976	0.029	0.391	5.10391e-88	AFG1L	DOWN
1.70253e-92	-0.510143	0.042	0.422	5.70994e-88	CDH4	DOWN
2.36994e-92	-0.338265	0.031	0.395	7.9483e-88	RCL1	DOWN
2.9605e-92	-0.436611	0.034	0.401	9.92891e-88	ELOVL6	DOWN
3.02779e-92	-0.331621	0.045	0.428	1.01546e-87	SPECC1	DOWN
3.8241e-92	-0.394175	0.044	0.425	1.28253e-87	LPIN1	DOWN
3.83189e-92	-0.251508	0.058	0.459	1.28514e-87	CFLAR	DOWN
5.5449e-92	-0.703076	0.023	0.373	1.85965e-87	CASC2	DOWN
6.64074e-92	-0.633408	0.019	0.365	2.22717e-87	SLC44A3	DOWN
7.8536e-92	-0.314095	0.046	0.43	2.63394e-87	CCDC7	DOWN
8.4185e-92	-0.418318	0.236	0.826	2.8234e-87	AKAP6	DOWN
9.24313e-92	-0.406184	0.039	0.413	3.09996e-87	LUZP1	DOWN
1.03622e-91	-0.467225	0.064	0.471	3.47529e-87	TOX	DOWN
1.14317e-91	-0.425138	0.019	0.364	3.83396e-87	TTC8	DOWN
1.39107e-91	-0.320659	0.024	0.375	4.66538e-87	DNAJC11	DOWN
1.43889e-91	-0.383792	0.032	0.395	4.82574e-87	TPTEP2-CSNK1E	DOWN
1.68282e-91	0.267064	0.122	0.608	5.64383e-87	KTN1	UP
1.7843e-91	-0.474684	0.019	0.363	5.98419e-87	SIMC1	DOWN
1.80028e-91	-0.299256	0.088	0.526	6.03779e-87	FGD4	DOWN
1.81994e-91	-0.497474	0.03	0.391	6.10373e-87	ARHGAP31	DOWN
1.86766e-91	0.273014	0.108	0.577	6.26377e-87	DYNC1LI2	UP
1.91258e-91	-0.417706	0.021	0.368	6.41442e-87	CEP162	DOWN
3.59932e-91	-0.464716	0.022	0.369	1.20714e-86	EEFSEC	DOWN
4.62933e-91	-0.355824	0.212	0.8	1.55258e-86	PPP3CA	DOWN
5.06805e-91	0.297039	0.146	0.665	1.69972e-86	HNRNPH1	UP
6.36443e-91	-0.338861	0.051	0.437	2.1345e-86	CDR2	DOWN
8.13526e-91	-0.292756	0.027	0.38	2.7284e-86	PTRH2	DOWN
9.73777e-91	-0.451912	0.039	0.41	3.26585e-86	FTCDNL1	DOWN
1.00319e-90	-0.473675	0.039	0.409	3.36451e-86	KCTD1	DOWN
1.0756e-90	-0.315139	0.044	0.422	3.60734e-86	SNX24	DOWN
1.08062e-90	-0.369424	0.031	0.391	3.6242e-86	RREB1	DOWN
1.57147e-90	-0.327812	0.048	0.43	5.27039e-86	GALNT7	DOWN
1.62439e-90	-0.297267	0.052	0.44	5.4479e-86	SNX25	DOWN
2.13082e-90	-0.328956	0.05	0.433	7.14634e-86	CPQ	DOWN
2.24144e-90	-0.356964	0.027	0.379	7.51734e-86	EFCAB6	DOWN
2.6297e-90	-0.312007	0.044	0.421	8.81947e-86	LINC00662	DOWN
2.87891e-90	-0.686134	0.043	0.415	9.65528e-86	LRRN1	DOWN
2.97756e-90	-0.426968	0.031	0.389	9.98613e-86	STIM1	DOWN
3.56399e-90	-0.474571	0.121	0.587	1.19529e-85	MLLT3	DOWN
3.95956e-90	-0.311171	0.024	0.371	1.32796e-85	ZFYVE26	DOWN
5.19048e-90	-0.347175	0.023	0.367	1.74078e-85	GDAP2	DOWN
5.29389e-90	-0.277168	0.028	0.381	1.77546e-85	TMEM161B	DOWN
7.07131e-90	-0.633446	0.035	0.396	2.37158e-85	RORB	DOWN
8.7703e-90	-0.318765	0.035	0.396	2.94138e-85	SEC22A	DOWN
8.88873e-90	-0.934252	0.029	0.381	2.9811e-85	AC104123.1	DOWN
9.40917e-90	-0.382181	0.029	0.383	3.15565e-85	UGDH-AS1	DOWN
1.08435e-89	-0.359301	0.025	0.371	3.63669e-85	ZNHIT6	DOWN
1.28007e-89	-0.652492	0.065	0.464	4.2931e-85	FRMD3	DOWN
1.34432e-89	-0.517857	0.016	0.349	4.50859e-85	ZNF197	DOWN
1.49371e-89	-0.456993	0.027	0.376	5.00962e-85	ERI1	DOWN
2.02343e-89	-0.253645	0.069	0.474	6.78617e-85	L3MBTL4	DOWN
2.28268e-89	-0.457235	0.016	0.348	7.65566e-85	DNAAF4	DOWN
2.48484e-89	-0.275342	0.028	0.38	8.33367e-85	VAC14	DOWN
3.04918e-89	-0.410116	0.029	0.381	1.02263e-84	PSMD5	DOWN
3.07471e-89	-0.702879	0.01	0.333	1.03119e-84	MIR34AHG	DOWN
3.09221e-89	-0.36448	0.026	0.373	1.03707e-84	TAMM41	DOWN
3.93082e-89	-0.688864	0.011	0.335	1.31832e-84	EYA2	DOWN
3.94222e-89	-0.917533	0.2	0.703	1.32214e-84	GRIP1	DOWN
4.40386e-89	-0.536109	0.015	0.345	1.47697e-84	TRIM66	DOWN
4.52575e-89	-0.390228	0.044	0.417	1.51785e-84	EFCAB2	DOWN
6.33462e-89	-0.31931	0.032	0.387	2.1245e-84	ETFDH	DOWN
6.38102e-89	-0.321908	0.028	0.379	2.14007e-84	NR2C1	DOWN
8.13157e-89	-0.432383	0.03	0.383	2.72717e-84	KANTR	DOWN
8.49735e-89	-0.562823	0.1	0.535	2.84984e-84	SLC4A4	DOWN
1.02944e-88	-0.465175	0.023	0.364	3.45252e-84	PPCDC	DOWN
1.5912e-88	-0.898182	0.043	0.409	5.33655e-84	PDZRN3	DOWN
1.63686e-88	-0.259021	0.035	0.392	5.48969e-84	GLB1	DOWN
2.17375e-88	-0.262876	0.028	0.374	7.29033e-84	TMEM67	DOWN
3.5744e-88	-0.417362	0.053	0.434	1.19878e-83	TMEM117	DOWN
4.95828e-88	-0.361556	0.038	0.398	1.66291e-83	ACACB	DOWN
6.8689e-88	-0.368291	0.126	0.588	2.30369e-83	FNIP2	DOWN
9.34283e-88	-0.33665	0.028	0.375	3.1334e-83	ARNTL	DOWN
2.02505e-87	-0.352017	0.03	0.379	6.79162e-83	TMEM38B	DOWN
2.05511e-87	-0.303859	0.038	0.397	6.89241e-83	STARD9	DOWN
2.08403e-87	-0.487701	0.02	0.353	6.98941e-83	DOCK6	DOWN
2.36075e-87	-0.421559	0.01	0.328	7.91748e-83	TMEM9B-AS1	DOWN
2.41985e-87	-0.331593	0.026	0.367	8.11568e-83	ZNF736	DOWN
3.44089e-87	-0.377387	0.031	0.379	1.154e-82	DNHD1	DOWN
3.84714e-87	-0.351149	0.056	0.438	1.29025e-82	KIAA0825	DOWN
4.00529e-87	-0.268399	0.032	0.381	1.3433e-82	CA5B	DOWN
4.66928e-87	-0.324526	0.025	0.364	1.56598e-82	ZNF814	DOWN
5.98507e-87	-0.667328	0.188	0.706	2.00727e-82	KCNMA1	DOWN
6.96501e-87	-0.824936	0.007	0.319	2.33592e-82	RAP2C-AS1	DOWN
7.17561e-87	-0.629498	0.056	0.435	2.40656e-82	LPAR1	DOWN
7.37106e-87	-0.373161	0.028	0.37	2.47211e-82	MERTK	DOWN
1.01666e-86	-0.336004	0.03	0.377	3.40967e-82	IRF2	DOWN
1.27314e-86	-0.509135	0.133	0.597	4.26986e-82	TXNRD1	DOWN
1.3255e-86	-0.275803	0.04	0.401	4.44546e-82	LRCH1	DOWN
1.83807e-86	-0.429387	0.02	0.35	6.16451e-82	ARSG	DOWN
1.93486e-86	-0.436708	0.012	0.33	6.48914e-82	FASTKD2	DOWN
2.23352e-86	-0.411556	0.031	0.377	7.49077e-82	PRMT3	DOWN
2.7083e-86	-0.379585	0.039	0.397	9.08309e-82	MEST	DOWN
2.79736e-86	-0.300425	0.049	0.42	9.38178e-82	MIPOL1	DOWN
3.50381e-86	-0.417234	0.054	0.432	1.17511e-81	RFX3-AS1	DOWN
4.03183e-86	-0.282739	0.034	0.383	1.3522e-81	GCFC2	DOWN
4.05515e-86	-0.294103	0.032	0.379	1.36002e-81	NFYC	DOWN
5.42464e-86	-0.35715	0.021	0.351	1.81932e-81	ZNF717	DOWN
6.00151e-86	-0.294549	0.031	0.377	2.01279e-81	ASAP3	DOWN
6.22036e-86	-0.389237	0.115	0.56	2.08618e-81	SAT1	DOWN
9.00152e-86	-0.412944	0.019	0.346	3.01893e-81	SETDB1	DOWN
9.45896e-86	-0.339901	0.052	0.425	3.17235e-81	FGF2	DOWN
1.05766e-85	-0.30993	0.124	0.587	3.54719e-81	KCNT2	DOWN
1.68507e-85	-0.397536	0.017	0.339	5.65139e-81	NOL8	DOWN
1.69386e-85	-0.368162	0.025	0.359	5.68087e-81	KLHL20	DOWN
1.9299e-85	-0.465785	0.026	0.361	6.47249e-81	STK38L	DOWN
1.98552e-85	-0.261662	0.028	0.366	6.65904e-81	CLDN12	DOWN
1.99484e-85	-0.609672	0.202	0.725	6.6903e-81	PLCB1	DOWN
2.43684e-85	-0.434033	0.018	0.342	8.17268e-81	AC025283.3	DOWN
2.47884e-85	-0.366478	0.036	0.385	8.31352e-81	PHACTR2	DOWN
2.72742e-85	-0.614963	0.017	0.339	9.14723e-81	MIR222HG	DOWN
3.21276e-85	-0.465145	0.025	0.358	1.0775e-80	MIPEP	DOWN
3.49169e-85	-0.550413	0.034	0.379	1.17104e-80	GRIK4	DOWN
4.37703e-85	-0.32132	0.048	0.411	1.46797e-80	BCR	DOWN
4.43482e-85	-0.403456	0.031	0.373	1.48735e-80	NEDD4	DOWN
4.8942e-85	-0.261357	0.032	0.375	1.64142e-80	LINC00630	DOWN
5.15516e-85	-0.359178	0.018	0.342	1.72894e-80	ACAD10	DOWN
5.69216e-85	-0.325753	0.098	0.527	1.90904e-80	C1orf21	DOWN
5.7082e-85	-0.378627	0.034	0.379	1.91442e-80	AC053527.1	DOWN
5.7128e-85	-0.423438	0.148	0.629	1.91596e-80	MGST1	DOWN
6.18341e-85	-0.397406	0.03	0.37	2.07379e-80	BIN3	DOWN
1.23891e-84	-0.334189	0.026	0.358	4.15505e-80	SRFBP1	DOWN
1.2978e-84	-0.277327	0.03	0.369	4.35256e-80	MLH1	DOWN
2.06158e-84	-0.644606	0.314	0.904	6.91412e-80	CADM1	DOWN
2.1175e-84	-0.260334	0.136	0.605	7.10167e-80	LIMCH1	DOWN
2.37312e-84	-0.302827	0.025	0.356	7.95898e-80	ERCC8	DOWN
3.38185e-84	-0.472867	0.07	0.458	1.13421e-79	UBA6-AS1	DOWN
3.82459e-84	-0.28554	0.036	0.382	1.28269e-79	CBWD5	DOWN
4.39799e-84	-0.328315	0.025	0.355	1.475e-79	INTS9	DOWN
4.75017e-84	-0.373301	0.019	0.341	1.59311e-79	AC025682.1	DOWN
5.43332e-84	-0.264406	0.028	0.364	1.82223e-79	CEP63	DOWN
6.03768e-84	-0.542377	0.021	0.345	2.02492e-79	ZNF423	DOWN
6.07237e-84	-0.484576	0.017	0.334	2.03655e-79	TNFRSF10B	DOWN
7.5185e-84	-0.406545	0.024	0.352	2.52155e-79	ETV5	DOWN
7.64265e-84	-0.378562	0.033	0.373	2.56319e-79	B3GLCT	DOWN
9.46216e-84	-0.633032	0.011	0.319	3.17342e-79	C11orf65	DOWN
1.00455e-83	0.261562	0.124	0.589	3.36907e-79	RSRP1	UP
1.90907e-83	-0.450704	0.037	0.382	6.40264e-79	AZIN1-AS1	DOWN
1.91346e-83	-0.445519	0.039	0.385	6.41736e-79	TBC1D1	DOWN
1.98184e-83	-0.582101	0.016	0.329	6.64671e-79	AC114763.1	DOWN
2.26912e-83	-0.496081	0.079	0.475	7.61018e-79	PDZD2	DOWN
2.56821e-83	-0.263531	0.031	0.369	8.61328e-79	RBM19	DOWN
4.51295e-83	-0.416638	0.033	0.372	1.51355e-78	CDC14A	DOWN
4.55961e-83	0.290767	0.115	0.564	1.5292e-78	CDC42BPB	UP
5.4795e-83	-0.502814	0.156	0.639	1.83771e-78	RGS7	DOWN
6.08817e-83	0.323032	0.161	0.673	2.04185e-78	SRSF11	UP
7.08232e-83	-0.345388	0.026	0.353	2.37527e-78	STYXL1	DOWN
1.02283e-82	-0.387192	0.019	0.337	3.43035e-78	KYAT1	DOWN
1.78707e-82	-0.407098	0.024	0.348	5.99349e-78	LINC02340	DOWN
1.85334e-82	-0.367809	0.039	0.383	6.21573e-78	C3orf58	DOWN
1.97384e-82	0.328676	0.123	0.583	6.61985e-78	SLC3A2	UP
2.18607e-82	-0.315091	0.044	0.396	7.33166e-78	LMO2	DOWN
2.39949e-82	0.344539	0.127	0.591	8.04742e-78	KIF2A	UP
2.43436e-82	-0.437388	0.069	0.451	8.16434e-78	NRP2	DOWN
2.57283e-82	-0.326426	0.036	0.376	8.62874e-78	PFKP	DOWN
3.23736e-82	-0.325912	0.035	0.373	1.08575e-77	ABCC1	DOWN
3.94483e-82	-0.344925	0.026	0.351	1.32302e-77	SLC38A9	DOWN
4.05665e-82	-0.433065	0.015	0.324	1.36052e-77	RMND1	DOWN
4.11278e-82	-0.409344	0.013	0.319	1.37935e-77	AL117336.3	DOWN
6.06436e-82	-0.26196	0.27	0.89	2.03387e-77	ARHGAP21	DOWN
9.47671e-82	0.270138	0.152	0.649	3.1783e-77	ABI2	UP
9.6279e-82	-0.320478	0.026	0.35	3.229e-77	KLHL18	DOWN
9.9969e-82	-0.40541	0.019	0.334	3.35276e-77	MFAP3	DOWN
1.5531e-81	-0.428922	0.039	0.382	5.20879e-77	ZSWIM5	DOWN
1.73993e-81	-0.347291	0.033	0.367	5.83539e-77	ANXA2	DOWN
1.78355e-81	-0.343337	0.018	0.331	5.98166e-77	THAP6	DOWN
1.82632e-81	-0.262081	0.034	0.369	6.1251e-77	XPO5	DOWN
2.02843e-81	-0.622546	0.024	0.344	6.80296e-77	STK32A	DOWN
2.14516e-81	-0.273074	0.029	0.357	7.19444e-77	SMARCC2	DOWN
3.58166e-81	-0.277583	0.055	0.418	1.20122e-76	SESN1	DOWN
3.6308e-81	-0.426497	0.016	0.323	1.2177e-76	WDR11-AS1	DOWN
6.93133e-81	-0.355836	0.028	0.353	2.32463e-76	CCDC30	DOWN
7.48409e-81	-0.337876	0.02	0.334	2.51001e-76	DECR1	DOWN
8.16682e-81	-0.260429	0.03	0.359	2.73899e-76	MRPS27	DOWN
8.68574e-81	-0.263986	0.031	0.361	2.91302e-76	TRIM56	DOWN
1.25956e-80	-0.290305	0.025	0.344	4.22431e-76	ASCC2	DOWN
1.60731e-80	-0.533484	0.038	0.375	5.39058e-76	DPH6-DT	DOWN
1.6893e-80	-0.296726	0.025	0.343	5.66556e-76	PTPDC1	DOWN
1.80837e-80	-0.356681	0.029	0.355	6.0649e-76	SPRY4-AS1	DOWN
2.30858e-80	-0.428746	0.013	0.314	7.74252e-76	AC093157.1	DOWN
2.43347e-80	-0.303381	0.096	0.508	8.16137e-76	CSGALNACT1	DOWN
2.61425e-80	-0.346893	0.03	0.356	8.76768e-76	AC084337.2	DOWN
2.63922e-80	-0.453632	0.022	0.336	8.85143e-76	AP003108.2	DOWN
2.89582e-80	-0.735392	0.024	0.341	9.71201e-76	TOX3	DOWN
2.9847e-80	-0.260106	0.032	0.361	1.00101e-75	FOXN2	DOWN
3.06387e-80	0.383806	0.076	0.466	1.02756e-75	ZNF708	UP
3.5947e-80	-0.316839	0.018	0.327	1.20559e-75	CCZ1B	DOWN
4.22372e-80	-0.267764	0.028	0.352	1.41655e-75	MRRF	DOWN
1.0259e-79	0.254249	0.191	0.733	3.44067e-75	ATRX	UP
1.1615e-79	-0.43516	0.025	0.341	3.89545e-75	ALDH1L1	DOWN
2.07904e-79	-0.25004	0.046	0.391	6.97267e-75	IKZF2	DOWN
3.15487e-79	-0.538297	0.023	0.335	1.05808e-74	PIR	DOWN
4.12512e-79	-0.433452	0.017	0.319	1.38348e-74	LINC01473	DOWN
5.19774e-79	0.269056	0.101	0.519	1.74322e-74	KIF5B	UP
7.20115e-79	0.319923	0.132	0.591	2.41512e-74	TMEM165	UP
7.56309e-79	-0.258685	0.043	0.383	2.53651e-74	TTC39C	DOWN
8.01371e-79	-0.423767	0.051	0.4	2.68764e-74	ACTN1	DOWN
8.94601e-79	0.310667	0.127	0.578	3.00031e-74	PAPOLA	UP
9.44222e-79	-0.44491	0.016	0.316	3.16673e-74	SLC25A43	DOWN
1.11959e-78	-0.455223	0.007	0.295	3.75489e-74	URGCP	DOWN
1.35009e-78	0.296262	0.098	0.512	4.52792e-74	USP14	UP
1.5994e-78	-0.270032	0.016	0.315	5.36408e-74	POLI	DOWN
1.7106e-78	0.280175	0.226	0.818	5.737e-74	HNRNPA2B1	UP
2.56228e-78	-0.533544	0.021	0.327	8.59338e-74	ITGA9	DOWN
2.64282e-78	-0.422871	0.069	0.438	8.86349e-74	CREB5	DOWN
2.80112e-78	-0.283721	0.022	0.331	9.3944e-74	BBS4	DOWN
4.12365e-78	0.256883	0.113	0.543	1.38299e-73	UBA6	UP
4.62017e-78	-0.497536	0.02	0.324	1.54951e-73	LIX1-AS1	DOWN
5.19727e-78	-0.400267	0.024	0.333	1.74306e-73	NIFK-AS1	DOWN
5.32033e-78	-0.458697	0.017	0.316	1.78433e-73	IQCH	DOWN
5.80596e-78	-0.336104	0.021	0.327	1.9472e-73	TCTN3	DOWN
5.99834e-78	0.33776	0.181	0.703	2.01172e-73	SON	UP
9.95396e-78	-0.297184	0.027	0.34	3.33836e-73	AC099669.1	DOWN
1.22623e-77	0.331512	0.118	0.554	4.11253e-73	TM9SF3	UP
1.40939e-77	-0.31621	0.028	0.343	4.72681e-73	METTL8	DOWN
1.41434e-77	-0.37572	0.02	0.323	4.74342e-73	ANKS6	DOWN
1.42061e-77	-0.258032	0.031	0.351	4.76443e-73	PPARD	DOWN
1.55202e-77	-0.310262	0.019	0.321	5.20515e-73	MCCC2	DOWN
2.3069e-77	-0.321503	0.018	0.319	7.73688e-73	AL158152.2	DOWN
2.7107e-77	-0.94651	0.007	0.29	9.09115e-73	AC027288.3	DOWN
2.75218e-77	-0.492686	0.006	0.288	9.23027e-73	EVC2	DOWN
2.89459e-77	-0.482109	0.024	0.331	9.70787e-73	KATNAL2	DOWN
3.09405e-77	-0.272149	0.022	0.327	1.03768e-72	NUDT5	DOWN
3.11034e-77	-0.426228	0.018	0.317	1.04315e-72	AC010618.3	DOWN
3.15797e-77	-0.257049	0.039	0.367	1.05912e-72	UNC13B	DOWN
3.52623e-77	-0.261261	0.028	0.341	1.18263e-72	RTF2	DOWN
4.77328e-77	-0.265734	0.039	0.367	1.60086e-72	ITGA7	DOWN
5.35008e-77	-0.574867	0.025	0.333	1.79431e-72	BICC1	DOWN
5.73815e-77	-0.368097	0.043	0.377	1.92446e-72	SYTL2	DOWN
5.80877e-77	-0.359967	0.026	0.335	1.94814e-72	ATP11C	DOWN
6.96966e-77	-0.27657	0.037	0.362	2.33749e-72	PDPN	DOWN
7.64924e-77	0.392251	0.124	0.565	2.5654e-72	VAPA	UP
1.30419e-76	-0.55348	0.019	0.318	4.374e-72	C21orf62-AS1	DOWN
1.46385e-76	-0.695901	0.034	0.352	4.90945e-72	PBX3	DOWN
1.59451e-76	-0.500191	0.322	0.909	5.34767e-72	DOCK4	DOWN
1.69445e-76	-0.388823	0.064	0.422	5.68283e-72	KCNQ1OT1	DOWN
2.05043e-76	-0.286757	0.025	0.331	6.87672e-72	IFT74	DOWN
2.17514e-76	0.372693	0.158	0.644	7.29498e-72	HP1BP3	UP
2.64729e-76	-0.304212	0.031	0.347	8.87849e-72	PKIG	DOWN
3.24879e-76	-0.393952	0.03	0.344	1.08958e-71	IRAK2	DOWN
3.484e-76	-0.619087	0.025	0.33	1.16846e-71	MEGF11	DOWN
3.9651e-76	-0.487219	0.013	0.3	1.32982e-71	MRPS30-DT	DOWN
4.70981e-76	-0.869482	0.041	0.367	1.57957e-71	RRAS2	DOWN
5.85151e-76	0.289281	0.097	0.5	1.96248e-71	KHDRBS1	UP
6.46105e-76	-0.275381	0.023	0.325	2.16691e-71	KANSL3	DOWN
6.75254e-76	-0.260257	0.031	0.345	2.26467e-71	ANXA4	DOWN
1.23703e-75	-0.76038	0.021	0.318	4.14875e-71	RNLS	DOWN
1.6985e-75	-0.258122	0.022	0.322	5.69644e-71	PEPD	DOWN
2.30897e-75	-0.402103	0.014	0.301	7.74383e-71	SENP1	DOWN
2.88285e-75	-0.549041	0.021	0.319	9.66851e-71	LINC01376	DOWN
3.34468e-75	-0.287601	0.029	0.338	1.12174e-70	TEX9	DOWN
3.56747e-75	-0.303954	0.024	0.325	1.19646e-70	PSMG4	DOWN
4.69126e-75	0.330047	0.18	0.691	1.57335e-70	MAPK1	UP
5.10758e-75	-0.494894	0.028	0.333	1.71298e-70	PROS1	DOWN
5.22979e-75	-0.334051	0.023	0.323	1.75397e-70	COPG2	DOWN
7.20178e-75	-0.648439	0.012	0.294	2.41533e-70	EFCAB11	DOWN
7.85087e-75	-0.385601	0.019	0.313	2.63303e-70	LINC00476	DOWN
1.0145e-74	-0.325645	0.028	0.332	3.40243e-70	LIMA1	DOWN
1.10936e-74	0.331452	0.107	0.518	3.72058e-70	HNRNPR	UP
1.22246e-74	-0.277111	0.022	0.319	4.09989e-70	HSDL2	DOWN
1.54669e-74	-0.455648	0.028	0.332	5.18727e-70	AC087564.1	DOWN
1.75174e-74	0.36772	0.156	0.633	5.87499e-70	OCIAD1	UP
1.76809e-74	-0.262688	0.027	0.329	5.92981e-70	PPIP5K1	DOWN
1.79066e-74	-0.328004	0.028	0.332	6.00552e-70	SEPT10	DOWN
1.94976e-74	-0.375792	0.01	0.289	6.5391e-70	AP002336.2	DOWN
2.22845e-74	-0.261664	0.039	0.358	7.47379e-70	SMS	DOWN
2.85211e-74	0.264816	0.086	0.468	9.56541e-70	RSRC2	UP
3.05674e-74	-0.777299	0.061	0.401	1.02517e-69	GLCCI1	DOWN
3.14669e-74	0.339752	0.138	0.588	1.05534e-69	PREPL	UP
4.3134e-74	-0.279317	0.024	0.321	1.44663e-69	ZNF507	DOWN
4.36755e-74	-0.354307	0.037	0.352	1.46479e-69	ALOX12-AS1	DOWN
4.47619e-74	-0.475932	0.033	0.343	1.50123e-69	ABTB2	DOWN
5.71324e-74	-0.315094	0.046	0.373	1.91611e-69	RFTN2	DOWN
5.85946e-74	-0.348912	0.035	0.348	1.96515e-69	AC090517.4	DOWN
6.44939e-74	-0.719694	0.025	0.323	2.163e-69	ROR1	DOWN
6.45186e-74	0.266056	0.094	0.485	2.16383e-69	CHD8	UP
8.74516e-74	-0.468075	0.035	0.346	2.93295e-69	AL359710.1	DOWN
9.60992e-74	0.259682	0.096	0.491	3.22297e-69	PNN	UP
1.14201e-73	-0.640911	0.3	0.848	3.83007e-69	ADGRV1	DOWN
1.14686e-73	-0.313603	0.022	0.315	3.84634e-69	SMARCAL1	DOWN
1.35202e-73	0.310854	0.116	0.534	4.53442e-69	SCARB2	UP
1.51261e-73	-0.284637	0.017	0.301	5.073e-69	TEFM	DOWN
1.51997e-73	-0.549893	0.003	0.267	5.09767e-69	EVC	DOWN
1.78532e-73	-0.33994	0.032	0.339	5.98761e-69	DCBLD2	DOWN
1.92084e-73	-0.280696	0.106	0.503	6.44211e-69	PHYHIPL	DOWN
2.11906e-73	-0.534846	0.021	0.313	7.10691e-69	MYOF	DOWN
3.28037e-73	-0.340539	0.034	0.343	1.10017e-68	DGKH	DOWN
3.41972e-73	-0.401816	0.017	0.303	1.14691e-68	BDNF-AS	DOWN
3.53542e-73	0.331356	0.107	0.512	1.18571e-68	NDUFS1	UP
3.68811e-73	0.419208	0.141	0.593	1.23692e-68	KPNB1	UP
3.90208e-73	-0.39662	0.027	0.325	1.30868e-68	FBXL13	DOWN
4.45995e-73	0.391615	0.152	0.617	1.49578e-68	WNK1	UP
4.76894e-73	-0.332393	0.015	0.296	1.59941e-68	PAXIP1	DOWN
5.05161e-73	-0.485136	0.079	0.44	1.69421e-68	TGFB2	DOWN
5.29291e-73	-0.296657	0.024	0.319	1.77513e-68	BORCS5	DOWN
5.52821e-73	-0.288315	0.04	0.357	1.85405e-68	AKAP7	DOWN
5.72611e-73	-0.387105	0.042	0.362	1.92042e-68	SPON1	DOWN
6.1413e-73	-0.271067	0.016	0.298	2.05967e-68	SLC26A11	DOWN
6.1983e-73	0.31788	0.16	0.634	2.07878e-68	CEP170	UP
6.32902e-73	-0.827331	0.084	0.442	2.12263e-68	FAT3	DOWN
6.41282e-73	-0.470198	0.323	0.902	2.15073e-68	SLC1A2	DOWN
7.45199e-73	-1.00736	0.011	0.285	2.49925e-68	AL022068.1	DOWN
8.16278e-73	-0.310373	0.024	0.317	2.73763e-68	AL683813.1	DOWN
8.53496e-73	-0.848757	0.296	0.782	2.86246e-68	NTM	DOWN
9.16112e-73	-0.649194	0.027	0.323	3.07246e-68	PRRX1	DOWN
1.01459e-72	0.312381	0.09	0.473	3.40274e-68	GOLGA3	UP
1.26203e-72	-0.298585	0.015	0.295	4.2326e-68	THBS4	DOWN
1.36294e-72	0.303077	0.111	0.519	4.57103e-68	SECISBP2L	UP
1.43609e-72	0.304729	0.174	0.667	4.81637e-68	CAMSAP2	UP
2.02215e-72	-0.307526	0.019	0.305	6.78189e-68	TMEM267	DOWN
2.07933e-72	-1.47669	0.19	0.574	6.97365e-68	CHI3L1	DOWN
2.25606e-72	-0.275235	0.027	0.323	7.56637e-68	IDH1	DOWN
2.31752e-72	-0.422438	0.017	0.301	7.7725e-68	AC009093.2	DOWN
2.59942e-72	-0.369861	0.171	0.629	8.71795e-68	NKAIN3	DOWN
2.97666e-72	-0.661121	0.221	0.697	9.98313e-68	NAMPT	DOWN
3.40377e-72	-0.339337	0.03	0.331	1.14156e-67	LRRC1	DOWN
3.54463e-72	0.252968	0.111	0.519	1.1888e-67	BCLAF1	UP
4.01003e-72	-0.291379	0.017	0.3	1.34488e-67	AC020928.1	DOWN
4.3365e-72	-0.279391	0.023	0.313	1.45438e-67	MAP3K14	DOWN
5.21346e-72	-0.364379	0.024	0.315	1.74849e-67	RHOJ	DOWN
8.42359e-72	0.406013	0.115	0.526	2.8251e-67	TSPAN3	UP
9.17689e-72	-1.10079	0.397	0.847	3.07774e-67	CTNNA2	DOWN
9.37825e-72	0.27566	0.084	0.454	3.14528e-67	PPIG	UP
1.22399e-71	-0.278108	0.031	0.331	4.10503e-67	IRAK1BP1	DOWN
2.19087e-71	0.474784	0.2	0.728	7.34774e-67	HNRNPU	UP
2.27165e-71	-0.362935	0.044	0.359	7.61867e-67	TTN-AS1	DOWN
2.41703e-71	0.361827	0.143	0.591	8.10625e-67	EIF3H	UP
3.17956e-71	-0.375576	0.023	0.311	1.06636e-66	LINC01301	DOWN
3.26018e-71	-0.342926	0.034	0.337	1.0934e-66	CDKL1	DOWN
3.44426e-71	0.275069	0.118	0.529	1.15514e-66	FAM20C	UP
3.48899e-71	-0.512855	0.017	0.294	1.17014e-66	IGSF9B	DOWN
4.60746e-71	-0.428231	0.02	0.303	1.54525e-66	NXN	DOWN
4.64254e-71	-0.320464	0.025	0.315	1.55702e-66	KLHL25	DOWN
4.97892e-71	0.297694	0.14	0.579	1.66983e-66	UBE2B	UP
5.44329e-71	-0.29673	0.018	0.299	1.82557e-66	SZT2	DOWN
5.88467e-71	-0.468577	0.028	0.321	1.9736e-66	SDC2	DOWN
6.53832e-71	-0.330424	0.013	0.285	2.19282e-66	ACADL	DOWN
1.11107e-70	-0.314398	0.015	0.288	3.7263e-66	FILIP1L	DOWN
1.56177e-70	0.293195	0.193	0.703	5.23788e-66	HERC1	UP
1.58237e-70	-0.26244	0.018	0.297	5.30695e-66	CATSPER2	DOWN
1.62947e-70	-0.530222	0.011	0.279	5.4649e-66	CA3	DOWN
1.72576e-70	-0.454726	0.02	0.301	5.78784e-66	PARVA	DOWN
1.84709e-70	-0.258023	0.025	0.313	6.19478e-66	MTERF4	DOWN
1.91572e-70	-0.827779	0.232	0.687	6.42494e-66	GRID2	DOWN
1.9193e-70	-0.639678	0.027	0.315	6.43696e-66	KCNIP1	DOWN
2.36144e-70	-0.562785	0.019	0.299	7.9198e-66	GEM	DOWN
3.48905e-70	0.36566	0.131	0.558	1.17016e-65	RANBP2	UP
4.61728e-70	0.403144	0.134	0.565	1.54854e-65	USP22	UP
4.82771e-70	-0.313302	0.049	0.366	1.61912e-65	EPHB1	DOWN
8.76709e-70	0.29973	0.085	0.452	2.94031e-65	SLC25A36	UP
1.03142e-69	-0.563315	0	0.247	3.45918e-65	AC090692.1	DOWN
1.03381e-69	-0.462858	0.018	0.294	3.46719e-65	MSRB3	DOWN
1.07252e-69	-0.280919	0.13	0.54	3.59701e-65	BAALC	DOWN
1.17161e-69	-0.25299	0.022	0.303	3.92933e-65	ADPGK	DOWN
1.30953e-69	0.311335	0.099	0.482	4.39189e-65	HNRNPH3	UP
1.53893e-69	-0.597989	0.365	0.929	5.16127e-65	AUTS2	DOWN
1.85109e-69	-0.807665	0.493	0.976	6.2082e-65	QKI	DOWN
2.94295e-69	-0.318364	0.015	0.284	9.87006e-65	XYLB	DOWN
3.0283e-69	-0.469005	0.027	0.313	1.01563e-64	AC091826.2	DOWN
4.73727e-69	-0.344386	0.029	0.319	1.58878e-64	LIPE-AS1	DOWN
4.75615e-69	-0.264086	0.022	0.301	1.59512e-64	ZNF568	DOWN
6.07307e-69	-0.331966	0.051	0.369	2.03679e-64	ADCY8	DOWN
6.61648e-69	-0.288432	0.032	0.325	2.21904e-64	XRCC4	DOWN
6.94348e-69	-0.455765	0.011	0.273	2.3287e-64	PRDM5	DOWN
1.05452e-68	-0.344216	0.012	0.275	3.53664e-64	ZNF790	DOWN
1.05518e-68	0.294179	0.114	0.512	3.53887e-64	MAP3K2	UP
1.10143e-68	0.301311	0.084	0.444	3.69396e-64	SLC44A2	UP
1.33867e-68	-0.410617	0.06	0.385	4.48962e-64	MAPK4	DOWN
1.47002e-68	-0.605438	0.008	0.265	4.93014e-64	LAMA3	DOWN
1.53314e-68	-0.380649	0.018	0.291	5.14184e-64	HFM1	DOWN
1.54729e-68	-0.56691	0.017	0.287	5.18928e-64	ARHGAP10	DOWN
1.72803e-68	-0.306206	0.021	0.297	5.79546e-64	ITFG2	DOWN
1.91858e-68	-0.734176	0.034	0.326	6.43452e-64	ADAM12	DOWN
1.98339e-68	0.392312	0.102	0.484	6.6519e-64	ILF3	UP
2.01015e-68	-0.266504	0.055	0.376	6.74164e-64	PLXNA2	DOWN
2.15851e-68	-0.374561	0.013	0.277	7.23919e-64	SMC5-AS1	DOWN
2.76565e-68	-0.266073	0.025	0.305	9.27544e-64	SLC15A4	DOWN
2.81013e-68	-0.614715	0.02	0.293	9.42461e-64	DMGDH	DOWN
4.6489e-68	-0.484251	0.28	0.803	1.55915e-63	PRKG1	DOWN
4.95639e-68	0.560133	0.169	0.636	1.66227e-63	AKAP9	UP
5.03797e-68	-0.322369	0.021	0.296	1.68964e-63	PTPN21	DOWN
5.46831e-68	-0.457638	0.066	0.397	1.83396e-63	MYO16	DOWN
5.64513e-68	-0.254278	0.022	0.298	1.89326e-63	CWF19L1	DOWN
6.17636e-68	-0.584253	0.032	0.321	2.07143e-63	TMOD3	DOWN
6.23768e-68	-0.250049	0.022	0.298	2.09199e-63	EIF2B1	DOWN
6.67107e-68	-0.38052	0.029	0.315	2.23734e-63	SMAD9	DOWN
1.05102e-67	-0.357578	0.035	0.327	3.52492e-63	SLC22A15	DOWN
1.13881e-67	-0.322406	0.017	0.283	3.81934e-63	MCPH1-AS1	DOWN
1.69295e-67	-0.442985	0.006	0.257	5.67782e-63	RORA-AS1	DOWN
1.82436e-67	-0.470236	0.015	0.278	6.11855e-63	CLYBL	DOWN
1.83923e-67	-0.795527	0.052	0.361	6.16841e-63	ARHGAP24	DOWN
2.04056e-67	0.473881	0.128	0.54	6.84363e-63	PPP3CB	UP
3.85712e-67	-0.413543	0.028	0.311	1.2936e-62	EPM2A	DOWN
6.0223e-67	-0.274871	0.019	0.288	2.01976e-62	TTLL4	DOWN
6.04941e-67	-0.252208	0.205	0.687	2.02885e-62	BRINP3	DOWN
6.28687e-67	-0.314613	0.023	0.297	2.10849e-62	STX6	DOWN
7.29454e-67	-0.367966	0.018	0.285	2.44644e-62	DNMBP	DOWN
7.41595e-67	-0.310034	0.023	0.297	2.48716e-62	NUP50-DT	DOWN
8.53705e-67	0.391015	0.142	0.571	2.86315e-62	NAP1L1	UP
1.31429e-66	-0.319103	0.017	0.279	4.40788e-62	PRKAG1	DOWN
1.87782e-66	0.326533	0.144	0.573	6.29782e-62	DNAJB6	UP
1.92934e-66	-0.566516	0.035	0.322	6.47063e-62	CDK6	DOWN
1.94533e-66	-0.38029	0.021	0.291	6.52424e-62	TRIM52	DOWN
2.44018e-66	-0.477858	0.007	0.256	8.18387e-62	TUBB6	DOWN
2.69626e-66	-0.709779	0.005	0.248	9.04273e-62	AL035078.4	DOWN
2.71214e-66	-0.256721	0.041	0.338	9.09599e-62	ZNF345	DOWN
3.31224e-66	-0.256153	0.021	0.29	1.11086e-61	COX10	DOWN
3.8085e-66	-0.255708	0.209	0.683	1.27729e-61	PTN	DOWN
4.17778e-66	0.313806	0.082	0.431	1.40115e-61	SRRM1	UP
4.68593e-66	-0.286428	0.017	0.281	1.57157e-61	FAM227B	DOWN
4.86466e-66	0.297084	0.093	0.456	1.63151e-61	AKAP8L	UP
5.04527e-66	0.442567	0.191	0.681	1.69208e-61	MTDH	UP
6.02145e-66	-0.578467	0.009	0.259	2.01947e-61	AL591686.2	DOWN
7.53467e-66	0.3756	0.135	0.551	2.52698e-61	PPP2CB	UP
8.19597e-66	-0.330287	0.014	0.271	2.74876e-61	PLCD1	DOWN
9.21183e-66	0.505528	0.173	0.638	3.08946e-61	NDFIP1	UP
1.11982e-65	0.50611	0.152	0.589	3.75566e-61	LARP1	UP
1.26812e-65	0.291906	0.096	0.46	4.25302e-61	KLHL24	UP
1.28102e-65	-0.315793	0.029	0.308	4.2963e-61	FANCC	DOWN
2.43693e-65	-0.259455	0.021	0.287	8.17297e-61	FBXO31	DOWN
2.48077e-65	-0.349778	0.02	0.285	8.32002e-61	ENTPD3-AS1	DOWN
3.6187e-65	-0.271585	0.012	0.264	1.21364e-60	ZNF627	DOWN
4.06736e-65	-0.287962	0.017	0.275	1.36411e-60	ZNF549	DOWN
4.07315e-65	0.276176	0.085	0.436	1.36605e-60	NMT1	UP
4.63738e-65	0.25239	0.099	0.466	1.55529e-60	SLC23A2	UP
4.89866e-65	-0.298228	0.016	0.273	1.64291e-60	ZDHHC15	DOWN
5.12359e-65	0.380601	0.1	0.469	1.71835e-60	DDX6	UP
6.07062e-65	-0.606986	0.401	0.912	2.03596e-60	MAGI2	DOWN
7.3684e-65	-0.398	0.084	0.425	2.47121e-60	EFEMP1	DOWN
8.859e-65	-0.428113	0.033	0.313	2.97113e-60	PLD5	DOWN
9.80654e-65	-0.309534	0.023	0.289	3.28892e-60	ALG14	DOWN
1.05546e-64	-0.300709	0.013	0.265	3.5398e-60	AC011043.1	DOWN
1.07066e-64	-0.522914	0.013	0.265	3.59078e-60	IL33	DOWN
1.08107e-64	-0.277641	0.03	0.307	3.62571e-60	SWT1	DOWN
1.2887e-64	0.268161	0.075	0.41	4.32204e-60	TMEM245	UP
1.41304e-64	0.42373	0.075	0.409	4.73905e-60	DTNB	UP
1.67336e-64	0.257828	0.106	0.478	5.6121e-60	TOP2B	UP
2.03232e-64	-0.341241	0.028	0.299	6.81598e-60	UCK2	DOWN
2.11805e-64	-0.268104	0.016	0.271	7.10352e-60	OGG1	DOWN
2.28221e-64	0.336287	0.093	0.449	7.65407e-60	SNRNP200	UP
2.48631e-64	-0.302125	0.028	0.299	8.3386e-60	SLC13A3	DOWN
2.84566e-64	-0.266172	0.015	0.268	9.54379e-60	EXOSC7	DOWN
2.88167e-64	0.5969	0.185	0.661	9.66456e-60	ARGLU1	UP
3.41474e-64	-0.478695	0.227	0.689	1.14524e-59	MGAT4C	DOWN
3.59997e-64	0.316258	0.096	0.456	1.20736e-59	CCNL2	UP
4.13844e-64	0.310964	0.08	0.419	1.38795e-59	WDR26	UP
4.3392e-64	-0.340268	0.019	0.279	1.45528e-59	LATS2	DOWN
5.14169e-64	0.469181	0.122	0.516	1.72442e-59	CSDE1	UP
5.45879e-64	-0.262231	0.027	0.296	1.83077e-59	AL356599.1	DOWN
6.35525e-64	-0.538012	0.016	0.269	2.13142e-59	GNG12-AS1	DOWN
8.21557e-64	0.277293	0.066	0.387	2.75534e-59	MIA3	UP
1.09988e-63	0.317892	0.088	0.437	3.68878e-59	LMNA	UP
1.2452e-63	-0.413836	0.044	0.335	4.17615e-59	RGS17	DOWN
1.48064e-63	-0.358221	0.025	0.29	4.96579e-59	CGNL1	DOWN
1.73378e-63	0.278097	0.095	0.45	5.81474e-59	HDGFL3	UP
2.49656e-63	0.284971	0.198	0.686	8.37298e-59	MAPT	UP
2.89952e-63	0.338328	0.093	0.446	9.72441e-59	DCAF7	UP
3.07428e-63	0.352157	0.084	0.427	1.03105e-58	POLR2B	UP
4.51423e-63	-0.293666	0.017	0.269	1.51398e-58	GTPBP2	DOWN
5.01574e-63	0.324932	0.166	0.609	1.68218e-58	RAPGEF2	UP
5.03383e-63	-0.437435	0.011	0.255	1.68824e-58	UFL1-AS1	DOWN
5.06269e-63	-0.336286	0.013	0.259	1.69793e-58	SNHG22	DOWN
5.24336e-63	-1.01204	0.022	0.28	1.75852e-58	ADAMTS6	DOWN
5.95245e-63	0.312954	0.096	0.451	1.99633e-58	GABBR1	UP
6.64882e-63	-0.293422	0.043	0.331	2.22988e-58	ILDR2	DOWN
7.64281e-63	-0.382471	0.039	0.321	2.56325e-58	C10orf90	DOWN
8.783e-63	-0.477183	0.038	0.316	2.94564e-58	COL4A2	DOWN
1.21392e-62	-0.423312	0.007	0.243	4.07123e-58	AL162411.1	DOWN
1.21952e-62	-0.292406	0.015	0.263	4.09004e-58	TTC26	DOWN
1.22174e-62	-0.393335	0.013	0.258	4.09747e-58	AC027097.2	DOWN
1.25517e-62	-0.350637	0.013	0.258	4.2096e-58	APIP	DOWN
1.29608e-62	0.437471	0.137	0.543	4.34679e-58	SF3B1	UP
1.67989e-62	0.254757	0.073	0.398	5.63402e-58	MUM1	UP
2.12974e-62	0.30765	0.085	0.425	7.14274e-58	NFIC	UP
2.17864e-62	-0.524119	0.019	0.273	7.30673e-58	ARSJ	DOWN
2.46539e-62	-0.295643	0.012	0.255	8.26841e-58	EXOSC1	DOWN
3.29367e-62	-0.336496	0.013	0.257	1.10463e-57	AC004076.1	DOWN
3.48216e-62	-0.317103	0.023	0.281	1.16785e-57	MEIS1	DOWN
3.48217e-62	-0.356268	0.036	0.311	1.16785e-57	SULF1	DOWN
3.91128e-62	-0.347581	0.014	0.259	1.31177e-57	STRADB	DOWN
3.94169e-62	0.346555	0.115	0.491	1.32196e-57	GPRC5B	UP
4.31887e-62	-0.317698	0.01	0.249	1.44846e-57	SPICE1	DOWN
4.60181e-62	0.342889	0.087	0.429	1.54336e-57	PTPN11	UP
5.33587e-62	-0.630392	0.01	0.248	1.78954e-57	MYO3A	DOWN
5.79886e-62	0.429309	0.113	0.485	1.94482e-57	YWHAQ	UP
7.46667e-62	-0.31292	0.11	0.468	2.50417e-57	CACNB2	DOWN
1.36493e-61	-0.419662	0.016	0.261	4.5777e-57	AC108062.1	DOWN
1.55557e-61	-0.296386	0.03	0.296	5.21708e-57	TPK1	DOWN
1.58397e-61	-0.508785	0.009	0.244	5.31231e-57	SUCLG2-AS1	DOWN
1.58546e-61	-0.292213	0.02	0.272	5.31732e-57	AC007216.4	DOWN
1.79882e-61	0.262432	0.096	0.447	6.03287e-57	RGMA	UP
1.93103e-61	-0.611651	0.09	0.419	6.4763e-57	CACNA1A	DOWN
2.0369e-61	-0.707523	0.139	0.514	6.83135e-57	AL589740.1	DOWN
2.5161e-61	0.537361	0.183	0.645	8.4385e-57	CLTC	UP
2.65922e-61	-0.36601	0.085	0.412	8.9185e-57	MAP3K5	DOWN
2.69436e-61	-0.256231	0.021	0.273	9.03634e-57	SLC25A17	DOWN
2.69868e-61	-0.282484	0.028	0.291	9.05083e-57	GFPT2	DOWN
2.77568e-61	0.28505	0.128	0.515	9.30908e-57	PTPRS	UP
2.83646e-61	-0.486091	0.022	0.275	9.51292e-57	ANKRD33B	DOWN
3.22747e-61	-0.379448	0.006	0.234	1.08243e-56	RENBP	DOWN
4.01901e-61	-0.325179	0.025	0.282	1.3479e-56	DHRS7B	DOWN
4.46364e-61	0.266261	0.072	0.389	1.49701e-56	CBX5	UP
5.62042e-61	-0.347891	0.009	0.243	1.88498e-56	AC007038.1	DOWN
5.94652e-61	-0.270114	0.03	0.294	1.99434e-56	DSE	DOWN
6.06761e-61	0.353307	0.1	0.453	2.03495e-56	EIF3A	UP
6.37944e-61	-0.250451	0.016	0.259	2.13953e-56	TVP23B	DOWN
8.77979e-61	-0.316799	0.013	0.252	2.94457e-56	C2orf76	DOWN
1.0341e-60	0.345796	0.097	0.446	3.46818e-56	ARPC2	UP
1.20222e-60	-0.357078	0.02	0.269	4.03199e-56	PIEZO1	DOWN
1.37632e-60	0.301106	0.144	0.549	4.61589e-56	MAPRE2	UP
1.37797e-60	-0.456695	0.009	0.242	4.62145e-56	RGS22	DOWN
1.47136e-60	-0.263601	0.011	0.246	4.93466e-56	PDSS1	DOWN
2.20583e-60	0.300129	0.085	0.418	7.39793e-56	FAM171A1	UP
2.33659e-60	0.315097	0.084	0.417	7.83646e-56	DDB1	UP
2.46271e-60	0.351251	0.123	0.502	8.25943e-56	ZNF451	UP
3.38273e-60	0.436466	0.153	0.57	1.1345e-55	ACSL3	UP
3.65891e-60	-0.259316	0.02	0.267	1.22713e-55	HELB	DOWN
3.86886e-60	-0.273655	0.049	0.333	1.29754e-55	CYP7B1	DOWN
4.9582e-60	-0.275526	0.033	0.297	1.66288e-55	CCDC146	DOWN
4.96691e-60	-2.17656	0.031	0.285	1.6658e-55	AC007402.1	DOWN
5.1169e-60	0.287948	0.073	0.389	1.71611e-55	RBBP6	UP
5.2892e-60	-0.292962	0.022	0.272	1.77389e-55	MDFIC	DOWN
5.74298e-60	0.261895	0.082	0.407	1.92608e-55	BAIAP2	UP
6.94377e-60	-0.28283	0.021	0.269	2.3288e-55	WBP2NL	DOWN
7.5591e-60	-0.361342	0.01	0.242	2.53517e-55	IPO9-AS1	DOWN
1.18501e-59	-0.268938	0.012	0.246	3.9743e-55	CA13	DOWN
1.24674e-59	0.281597	0.081	0.405	4.18133e-55	TXNL4A	UP
1.37869e-59	0.615368	0.172	0.612	4.62383e-55	NUCKS1	UP
1.46861e-59	-0.422039	0.321	0.85	4.92541e-55	SLC1A3	DOWN
1.70025e-59	0.310341	0.083	0.408	5.7023e-55	TROVE2	UP
1.8473e-59	-0.412416	0.017	0.258	6.19549e-55	MMD2	DOWN
1.86361e-59	0.449148	0.107	0.464	6.25017e-55	SUGP2	UP
1.87419e-59	-0.393692	0.008	0.236	6.28565e-55	PHKA1	DOWN
2.1106e-59	0.34768	0.083	0.409	7.07852e-55	CSNK1D	UP
2.39824e-59	-0.276766	0.023	0.272	8.0432e-55	GRK4	DOWN
2.56501e-59	-0.802104	0.017	0.255	8.60254e-55	LINC01748	DOWN
3.05078e-59	0.386954	0.088	0.421	1.02317e-54	ACADVL	UP
5.11535e-59	-0.266677	0.015	0.251	1.71559e-54	MIATNB	DOWN
5.25647e-59	-0.39096	0.013	0.246	1.76292e-54	FUT10	DOWN
6.29219e-59	-0.466284	0.021	0.266	2.11027e-54	LINC01515	DOWN
6.76788e-59	-0.351141	0.005	0.224	2.26981e-54	SPDYE3	DOWN
7.5875e-59	-0.552088	0.009	0.236	2.5447e-54	HRH1	DOWN
8.45291e-59	-0.346282	0.013	0.245	2.83494e-54	MMP24OS	DOWN
9.60182e-59	-0.300283	0.009	0.235	3.22026e-54	SRP14-AS1	DOWN
1.11472e-58	-0.310338	0.018	0.259	3.73854e-54	TSPAN9	DOWN
1.11824e-58	-0.624884	0.01	0.237	3.75034e-54	AC007364.1	DOWN
1.31325e-58	0.290839	0.074	0.387	4.40439e-54	SCRN1	UP
1.32811e-58	0.490314	0.144	0.544	4.45422e-54	GLS	UP
2.1323e-58	-0.321558	0.02	0.262	7.15129e-54	PPARGC1A	DOWN
2.30147e-58	-0.307965	0.016	0.251	7.71866e-54	AC016705.2	DOWN
2.49714e-58	-0.269904	0.028	0.279	8.3749e-54	TRIM25	DOWN
3.09354e-58	-0.361196	0.008	0.232	1.03751e-53	ZNF442	DOWN
3.12551e-58	0.28527	0.117	0.48	1.04823e-53	MYO9B	UP
3.4341e-58	-0.344365	0.015	0.248	1.15173e-53	JAM2	DOWN
3.45834e-58	0.326114	0.072	0.38	1.15986e-53	SELENOO	UP
3.7615e-58	-0.259326	0.013	0.243	1.26153e-53	TLDC1	DOWN
3.82631e-58	-0.271986	0.02	0.261	1.28327e-53	TRAF3IP2	DOWN
5.28988e-58	0.277973	0.073	0.381	1.77412e-53	KLHL5	UP
6.92622e-58	0.420411	0.051	0.333	2.32291e-53	DDX21	UP
7.53824e-58	-0.369883	0.028	0.277	2.52817e-53	VLDLR-AS1	DOWN
7.61539e-58	0.288964	0.062	0.358	2.55405e-53	HNRNPUL1	UP
7.8212e-58	0.258585	0.117	0.477	2.62307e-53	TLE4	UP
7.86622e-58	-0.612895	0.023	0.266	2.63817e-53	WNT5B	DOWN
1.06091e-57	-0.616761	0.01	0.234	3.55808e-53	RUBCNL	DOWN
1.06569e-57	0.407987	0.088	0.414	3.57412e-53	CAPRIN1	UP
1.21904e-57	0.310564	0.08	0.395	4.08842e-53	KLHL23	UP
1.41147e-57	0.370644	0.098	0.437	4.73379e-53	C6orf62	UP
1.41209e-57	-0.26463	0.015	0.246	4.73586e-53	NPIPB4	DOWN
1.85747e-57	-0.444987	0.008	0.229	6.22959e-53	MAMDC2-AS1	DOWN
2.02664e-57	0.26873	0.082	0.399	6.79693e-53	STAU2	UP
2.04273e-57	0.337252	0.076	0.387	6.85091e-53	IL6ST	UP
2.08084e-57	-0.529715	0.04	0.304	6.97872e-53	FGF1	DOWN
2.35946e-57	-0.288223	0.032	0.286	7.91316e-53	NOS1AP	DOWN
2.68587e-57	-0.256232	0.018	0.254	9.00788e-53	ARMH1	DOWN
3.25173e-57	-0.299845	0.017	0.251	1.09056e-52	CCDC102B	DOWN
3.702e-57	-0.264311	0.013	0.24	1.24158e-52	STK17A	DOWN
3.83068e-57	0.260531	0.07	0.372	1.28473e-52	GTF3C1	UP
4.57165e-57	-0.344755	0.012	0.237	1.53324e-52	AC125613.1	DOWN
5.7649e-57	-0.322918	0.011	0.234	1.93343e-52	TTF2	DOWN
5.85099e-57	0.259694	0.062	0.352	1.96231e-52	TOR1AIP2	UP
5.96578e-57	-0.269117	0.013	0.239	2.0008e-52	PATL1	DOWN
6.15995e-57	0.444774	0.102	0.443	2.06593e-52	TMEM259	UP
6.18946e-57	0.263729	0.076	0.385	2.07582e-52	RAB21	UP
7.32759e-57	0.642089	0.179	0.619	2.45753e-52	YWHAE	UP
7.50565e-57	0.452935	0.085	0.405	2.51725e-52	CLK1	UP
8.65817e-57	-0.254026	0.044	0.311	2.90378e-52	CCNG2	DOWN
9.93186e-57	-0.316829	0.011	0.234	3.33095e-52	AC005332.5	DOWN
1.28379e-56	-0.348269	0.013	0.238	4.30557e-52	AC008629.1	DOWN
1.86481e-56	-0.412647	0.108	0.442	6.25419e-52	GALNT13	DOWN
1.95462e-56	0.287212	0.065	0.359	6.55541e-52	AC005261.1	UP
2.10477e-56	-0.415693	0.29	0.773	7.05897e-52	KAZN	DOWN
2.39864e-56	0.356938	0.111	0.459	8.04455e-52	FNBP1L	UP
2.78743e-56	0.356449	0.081	0.393	9.3485e-52	ANAPC5	UP
2.82749e-56	-0.32632	0.005	0.216	9.48284e-52	ZBTB20-AS5	DOWN
3.1751e-56	0.341286	0.104	0.444	1.06487e-51	FAM49B	UP
3.28801e-56	0.41732	0.058	0.341	1.10273e-51	EIF3M	UP
3.67802e-56	0.362634	0.254	0.793	1.23353e-51	MYCBP2	UP
3.69202e-56	0.557618	0.186	0.632	1.23823e-51	SNRNP70	UP
4.79681e-56	0.25548	0.079	0.387	1.60875e-51	STT3B	UP
5.24464e-56	-0.26046	0.015	0.24	1.75895e-51	AL645568.1	DOWN
5.817e-56	-0.300461	0.021	0.256	1.95091e-51	SLC19A2	DOWN
6.12128e-56	-0.274698	0.02	0.254	2.05295e-51	CNKSR3	DOWN
7.26401e-56	0.281281	0.075	0.379	2.4362e-51	FAM208A	UP
7.45507e-56	-0.748462	0.412	0.83	2.50028e-51	NLGN1	DOWN
8.09087e-56	-0.260754	0.027	0.269	2.71351e-51	SLCO1C1	DOWN
8.85257e-56	0.375643	0.117	0.47	2.96897e-51	SORT1	UP
9.92499e-56	0.41105	0.09	0.411	3.32864e-51	SNX3	UP
1.02655e-55	0.533888	0.157	0.562	3.44284e-51	PTGES3	UP
1.10809e-55	-0.716573	0.118	0.444	3.71631e-51	GRIK1	DOWN
1.1457e-55	0.37215	0.098	0.429	3.84244e-51	CCT4	UP
1.48779e-55	-0.458861	0.019	0.25	4.98975e-51	AC108866.1	DOWN
1.81863e-55	0.46854	0.244	0.768	6.09932e-51	GNB1	UP
2.38086e-55	0.628511	0.22	0.711	7.98492e-51	KIDINS220	UP
3.01719e-55	-0.555954	0.021	0.253	1.01191e-50	BMPER	DOWN
3.25033e-55	0.356356	0.09	0.409	1.0901e-50	AP3D1	UP
3.30253e-55	0.267994	0.103	0.436	1.1076e-50	ESYT2	UP
3.76222e-55	-0.40361	0.02	0.251	1.26177e-50	COL27A1	DOWN
3.80677e-55	0.403079	0.095	0.419	1.27671e-50	KIFAP3	UP
4.43582e-55	0.312668	0.113	0.46	1.48768e-50	HACD3	UP
4.63516e-55	0.272042	0.077	0.381	1.55454e-50	RNPS1	UP
5.92665e-55	0.409289	0.091	0.411	1.98768e-50	SEL1L	UP
6.2697e-55	-0.293456	0.009	0.223	2.10273e-50	AC009061.2	DOWN
7.83797e-55	0.378706	0.084	0.396	2.6287e-50	DNAJC5	UP
9.03758e-55	-0.266555	0.05	0.315	3.03103e-50	AC025159.1	DOWN
9.73566e-55	-0.255338	0.018	0.245	3.26514e-50	EMX2OS	DOWN
1.04227e-54	-0.25351	0.028	0.269	3.49556e-50	MCUB	DOWN
1.37516e-54	-0.326203	0.024	0.257	4.61202e-50	BCAR3	DOWN
1.39737e-54	-0.347726	0.016	0.238	4.6865e-50	MYOM1	DOWN
1.51011e-54	0.460535	0.093	0.413	5.06462e-50	SMARCA5	UP
1.67603e-54	-0.325136	0.014	0.233	5.62106e-50	OARD1	DOWN
1.68632e-54	0.270888	0.077	0.377	5.65557e-50	ULK2	UP
1.85495e-54	0.298489	0.083	0.389	6.22113e-50	TPM1	UP
2.43905e-54	-0.291319	0.007	0.216	8.18008e-50	AC083798.2	DOWN
2.66139e-54	0.422131	0.087	0.4	8.92577e-50	PSMC6	UP
3.11168e-54	-0.571673	0.016	0.236	1.04359e-49	ZEB1-AS1	DOWN
3.63542e-54	-0.546386	0.041	0.295	1.21925e-49	DGKG	DOWN
4.54204e-54	-0.854862	0.025	0.256	1.52331e-49	DACH1	DOWN
4.61597e-54	-0.646608	0.42	0.88	1.54811e-49	FAM155A	DOWN
4.83823e-54	-0.482197	0.129	0.468	1.62264e-49	LUZP2	DOWN
4.91681e-54	-0.380726	0.021	0.249	1.649e-49	MAP3K1	DOWN
5.48807e-54	-0.338829	0.011	0.224	1.84059e-49	AL136366.1	DOWN
5.49225e-54	0.314902	0.073	0.366	1.84199e-49	SAMD8	UP
7.13655e-54	0.481489	0.135	0.502	2.39346e-49	NFIX	UP
7.40192e-54	0.506492	0.163	0.564	2.48246e-49	PGAP1	UP
7.73935e-54	-0.265868	0.01	0.222	2.59562e-49	ADAL	DOWN
1.10751e-53	-0.259391	0.063	0.342	3.71436e-49	WWC1	DOWN
1.23972e-53	0.361579	0.073	0.365	4.15777e-49	NDUFV1	UP
1.53849e-53	0.499117	0.134	0.502	5.15979e-49	MORF4L2	UP
1.62862e-53	0.405548	0.076	0.372	5.46206e-49	FAM3C	UP
1.76939e-53	0.349253	0.096	0.416	5.93418e-49	PDZD8	UP
1.97033e-53	0.345847	0.076	0.373	6.6081e-49	STXBP3	UP
1.98154e-53	0.466447	0.126	0.481	6.6457e-49	PABPC1	UP
2.44443e-53	-0.309794	0.009	0.217	8.19813e-49	DET1	DOWN
2.98526e-53	-0.375045	0.01	0.22	1.0012e-48	MB21D2	DOWN
3.17952e-53	0.489287	0.261	0.795	1.06635e-48	CCDC88A	UP
4.03325e-53	0.283293	0.163	0.564	1.35267e-48	DPYSL3	UP
4.74242e-53	-0.254484	0.028	0.263	1.59051e-48	NRG2	DOWN
4.79374e-53	0.262661	0.09	0.399	1.60772e-48	SNAP91	UP
5.20403e-53	0.302018	0.066	0.349	1.74533e-48	FZD3	UP
6.04726e-53	-0.311537	0.009	0.216	2.02813e-48	NOCT	DOWN
8.99075e-53	-0.267236	0.006	0.206	3.01532e-48	ZSCAN23	DOWN
1.19127e-52	-0.303047	0.008	0.213	3.99528e-48	ADGRF3	DOWN
1.20048e-52	-0.276265	0.01	0.217	4.02616e-48	AC005833.2	DOWN
1.52097e-52	0.446381	0.083	0.383	5.10102e-48	TPD52L2	UP
2.03856e-52	0.340386	0.075	0.366	6.83694e-48	RNF10	UP
2.05818e-52	0.379474	0.275	0.822	6.90274e-48	TTC3	UP
3.50227e-52	-0.305562	0.011	0.218	1.17459e-47	MTCL1	DOWN
3.93932e-52	0.254623	0.068	0.349	1.32117e-47	BLCAP	UP
4.54701e-52	0.270806	0.162	0.551	1.52498e-47	ALCAM	UP
4.99876e-52	0.465833	0.096	0.411	1.67649e-47	DDX3X	UP
6.79627e-52	2.93287	0.606	0.657	2.27933e-47	SPP1	UP
7.20752e-52	-0.25451	0.02	0.24	2.41726e-47	IFIT3	DOWN
7.91601e-52	-0.402058	0.039	0.281	2.65487e-47	LGR4	DOWN
8.56685e-52	0.365457	0.09	0.396	2.87315e-47	DNAJB14	UP
9.95408e-52	-0.318916	0.022	0.243	3.3384e-47	TGFBR3	DOWN
1.15242e-51	-0.321695	0.008	0.21	3.865e-47	AP005433.1	DOWN
1.16694e-51	0.51095	0.185	0.606	3.91368e-47	CHN1	UP
1.33601e-51	0.350108	0.087	0.389	4.48073e-47	CRK	UP
1.40096e-51	0.396705	0.095	0.406	4.69853e-47	TMED10	UP
1.58542e-51	0.733472	0.204	0.655	5.31719e-47	DYNC1H1	UP
1.72179e-51	-0.620939	0.008	0.209	5.77455e-47	SLC25A21	DOWN
1.73318e-51	0.413787	0.103	0.423	5.81275e-47	ARID4A	UP
1.73771e-51	0.264884	0.057	0.323	5.82794e-47	RSBN1L	UP
1.74412e-51	-0.387248	0.028	0.255	5.84943e-47	ALDH1A2	DOWN
2.15137e-51	0.301875	0.067	0.344	7.21526e-47	UBE2N	UP
2.3244e-51	-0.33463	0.113	0.431	7.79557e-47	LRRTM3	DOWN
2.49113e-51	-0.269749	0.012	0.218	8.35475e-47	CASP7	DOWN
2.58863e-51	0.444937	0.1	0.416	8.68174e-47	LNPEP	UP
2.66809e-51	-0.325462	0.012	0.217	8.94825e-47	AC078785.1	DOWN
2.77199e-51	-0.2538	0.006	0.204	9.29671e-47	KIF7	DOWN
3.02703e-51	0.424039	0.273	0.82	1.01521e-46	DDX17	UP
4.37668e-51	-0.397715	0.013	0.219	1.46785e-46	AC008467.1	DOWN
4.45782e-51	0.338836	0.088	0.389	1.49506e-46	NPM1	UP
7.2238e-51	-0.396865	0.029	0.257	2.42272e-46	MOB3B	DOWN
7.4255e-51	0.386227	0.125	0.468	2.49037e-46	SOBP	UP
7.61686e-51	0.283794	0.065	0.339	2.55454e-46	NISCH	UP
9.05259e-51	0.411482	0.097	0.409	3.03606e-46	HSPA4	UP
1.08082e-50	-0.588938	0.011	0.213	3.62484e-46	AL359232.1	DOWN
1.09724e-50	-0.303219	0.008	0.206	3.67991e-46	NOD1	DOWN
1.12755e-50	-0.533667	0.029	0.256	3.78158e-46	GNA14	DOWN
1.20685e-50	-0.636975	0.022	0.239	4.04752e-46	FRMD6	DOWN
1.60208e-50	-0.282929	0.012	0.215	5.37306e-46	PITPNA-AS1	DOWN
1.95514e-50	0.544673	0.118	0.451	6.55715e-46	OGFRL1	UP
2.96746e-50	-0.286858	0.011	0.212	9.95228e-46	CFAP61	DOWN
3.08166e-50	0.256348	0.058	0.32	1.03353e-45	EIF3L	UP
3.13172e-50	0.346937	0.108	0.428	1.05032e-45	ANKRD44	UP
3.54219e-50	1.79351	0.68	0.802	1.18798e-45	HSP90AA1	UP
3.94149e-50	-0.394264	0.021	0.236	1.3219e-45	AC138627.1	DOWN
4.28277e-50	-0.281659	0.026	0.246	1.43635e-45	MAMLD1	DOWN
4.54177e-50	0.376739	0.077	0.361	1.52322e-45	EIF2S2	UP
9.08778e-50	0.347919	0.072	0.348	3.04786e-45	C16orf72	UP
1.34966e-49	0.561008	0.107	0.426	4.52649e-45	DYNC1I2	UP
1.86747e-49	0.298941	0.068	0.339	6.26311e-45	SUCLA2	UP
1.94614e-49	0.474431	0.103	0.415	6.52698e-45	BNIP3L	UP
2.22487e-49	0.533753	0.107	0.423	7.46177e-45	PTTG1IP	UP
2.53652e-49	-0.327355	0.015	0.218	8.50697e-45	MALRD1	DOWN
3.06851e-49	-0.55455	0.039	0.271	1.02912e-44	AC233296.1	DOWN
3.39857e-49	0.471378	0.096	0.399	1.13981e-44	CLTA	UP
4.86863e-49	0.493527	0.087	0.379	1.63284e-44	ZC3H15	UP
5.23911e-49	-0.525951	0.003	0.186	1.75709e-44	NOX4	DOWN
6.09335e-49	-0.255355	0.026	0.242	2.04359e-44	ARSB	DOWN
6.1752e-49	-0.358853	0.006	0.196	2.07104e-44	AC087477.2	DOWN
6.55748e-49	0.462133	0.081	0.365	2.19925e-44	FAM213A	UP
6.86103e-49	0.378961	0.069	0.339	2.30105e-44	C6orf89	UP
6.95751e-49	-0.441264	0.054	0.303	2.33341e-44	KIF26B	DOWN
7.97432e-49	0.445686	0.077	0.357	2.67443e-44	HMGN2	UP
9.03072e-49	0.375383	0.083	0.368	3.02872e-44	MLEC	UP
1.08774e-48	0.539748	0.096	0.397	3.64807e-44	PPM1K	UP
1.09935e-48	-0.401021	0.011	0.206	3.68701e-44	AC021231.1	DOWN
1.43132e-48	-0.25187	0.01	0.204	4.80036e-44	LINC01550	DOWN
1.63585e-48	0.268569	0.066	0.331	5.4863e-44	TMF1	UP
1.87403e-48	-0.300466	0.007	0.196	6.28512e-44	AL603839.3	DOWN
1.96181e-48	0.251996	0.222	0.665	6.57953e-44	CHL1	UP
2.53101e-48	-0.645783	0.006	0.191	8.48848e-44	IL1R1	DOWN
4.78875e-48	-0.254839	0.02	0.226	1.60605e-43	SYT9	DOWN
4.9663e-48	-0.483697	0.012	0.206	1.6656e-43	AC091078.1	DOWN
5.48489e-48	0.252546	0.057	0.31	1.83952e-43	WIPI2	UP
5.81788e-48	-0.310262	0.008	0.197	1.9512e-43	AL136164.2	DOWN
5.97792e-48	0.329069	0.072	0.342	2.00488e-43	PRRC2A	UP
6.85168e-48	0.568105	0.201	0.628	2.29792e-43	R3HDM1	UP
7.14311e-48	0.406747	0.083	0.365	2.39566e-43	PCF11	UP
7.23864e-48	0.411637	0.107	0.416	2.42769e-43	CD47	UP
7.37071e-48	-0.321426	0.032	0.253	2.47199e-43	CHST9	DOWN
7.64074e-48	0.474134	0.11	0.424	2.56255e-43	EIF5	UP
7.745e-48	-0.252979	0.003	0.182	2.59752e-43	SPDYE2	DOWN
8.20107e-48	0.590234	0.153	0.52	2.75048e-43	CEBPD	UP
9.51976e-48	-0.285561	0.012	0.205	3.19274e-43	AC091167.6	DOWN
1.25145e-47	0.602529	0.112	0.428	4.1971e-43	AKAP11	UP
1.699e-47	-0.571249	0.264	0.659	5.69811e-43	KCND2	DOWN
1.74429e-47	-0.450149	0.028	0.241	5.85e-43	AL445250.1	DOWN
2.39434e-47	0.376868	0.075	0.347	8.03013e-43	SUPT16H	UP
2.44402e-47	0.370274	0.141	0.486	8.19676e-43	PCDH17	UP
2.77877e-47	0.270558	0.079	0.354	9.31943e-43	ABCA3	UP
3.93573e-47	0.279233	0.072	0.339	1.31997e-42	SCARA3	UP
3.99081e-47	0.381002	0.095	0.388	1.33844e-42	PACS2	UP
4.69953e-47	0.678911	0.217	0.663	1.57613e-42	DDX5	UP
5.59414e-47	0.821367	0.148	0.504	1.87616e-42	SEC62	UP
5.66605e-47	0.344697	0.073	0.341	1.90028e-42	EIF3J	UP
7.61482e-47	0.309372	0.076	0.347	2.55386e-42	ZCCHC17	UP
7.83508e-47	-0.398793	0.027	0.236	2.62773e-42	TPD52L1	DOWN
8.75967e-47	0.43431	0.07	0.333	2.93782e-42	TNFRSF1A	UP
9.51786e-47	0.257997	0.062	0.317	3.1921e-42	SRP72	UP
1.40545e-46	0.390053	0.071	0.335	4.71361e-42	LPCAT1	UP
2.42583e-46	-0.259072	0.037	0.258	8.13574e-42	ANXA1	DOWN
3.83221e-46	0.47164	0.085	0.365	1.28525e-41	RTF1	UP
3.98974e-46	-0.648655	0.128	0.422	1.33808e-41	NEBL	DOWN
4.65122e-46	0.506957	0.097	0.39	1.55993e-41	GOLM1	UP
4.98779e-46	-0.264312	0.002	0.174	1.67281e-41	AL513314.2	DOWN
5.17888e-46	-0.303665	0.013	0.202	1.73689e-41	NTN1	DOWN
6.25144e-46	-0.329228	0.027	0.234	2.09661e-41	KLHL4	DOWN
7.20107e-46	0.283014	0.069	0.327	2.41509e-41	CREBZF	UP
8.17966e-46	0.303771	0.067	0.323	2.7433e-41	TMEM248	UP
8.29002e-46	0.30857	0.072	0.333	2.78031e-41	RPN2	UP
9.80005e-46	-0.328521	0.022	0.222	3.28674e-41	KCNH1	DOWN
1.15696e-45	0.49838	0.094	0.381	3.8802e-41	MGST3	UP
1.25085e-45	-0.369884	0.359	0.825	4.19511e-41	DCLK1	DOWN
1.36132e-45	0.32113	0.071	0.331	4.56558e-41	FBXO21	UP
1.38657e-45	-0.372231	0.019	0.216	4.65029e-41	KATNA1	DOWN
1.50417e-45	-0.256296	0.009	0.19	5.04467e-41	C1orf54	DOWN
1.97622e-45	0.476624	0.11	0.413	6.62783e-41	CSRNP3	UP
3.02893e-45	0.330462	0.067	0.321	1.01584e-40	DEAF1	UP
3.08464e-45	0.699324	0.136	0.47	1.03453e-40	LAMP2	UP
3.13534e-45	0.32324	0.069	0.325	1.05153e-40	UBA1	UP
3.37705e-45	0.336793	0.06	0.305	1.1326e-40	SNX27	UP
[truncated: 1,725 more rows]

## Sheet: FigS2E-UP
The GO analysis of up-regulate genes of aNSC compared with pNSC
ID	Description	GeneRatio	BgRatio	pvalue	p.adjust	qvalue	geneID	Count
GO:0006413	translational initiation	86/1705	160/16374	1.26215e-42	6.37639e-39	5.63185e-39	KHDRBS1/EIF3H/LARP1/EIF3A/EIF3M/PABPC1/DDX3X/EIF3L/EIF2S2/EIF5/EIF3J/EIF3K/EIF3F/RPL10A/EIF4A1/EIF4H/RPL12/EIF1AX/PAIP1/EIF4G1/NCBP2/RPL31/RPL22/RPL5/RPS20/EIF4G2/RPL14/RPS25/EIF4A2/RPL37/EIF3I/RPS6KB2/RPS6/EIF1/RPL23/RPL23A/EIF3G/RPS3/EIF1B/RPS12/RPL6/RPL27A/RPLP2/RPS23/RPL11/RPL21/RPS17/RPL29/RPS7/RPL9/RPL30/RPS26/RPL7/RPL4/RPL13/RPL24/RPL19/RPS15A/RPL27/RPL34/RPS11/RPS14/RPS16/RPL35A/RPL8/RPS2…	86
GO:0006614	SRP-dependent cotranslational protein targeting to membrane	65/1705	98/16374	1.92532e-40	4.86337e-37	4.2955e-37	SRP72/SEC61A1/RPL10A/TRAM1/SSR3/RPL12/SRP9/RPL31/RPL22/RPL5/RPS20/RPL14/RPS25/RPL37/RPS6/RPL23/RPL23A/RPS3/RPS12/RPL6/RPL27A/RPLP2/RPS23/RPL11/RPL21/RPS17/RPL29/RPS7/RPL9/RPL30/SRP14/RPS26/RPL7/RPL4/RPL13/RPL24/RPL19/RPS15A/RPL27/RPL34/RPS11/RPS14/RPS16/RPL35A/RPL8/RPS24/RPL10/RPS9/RPL7A/RPS27/RPS21/RPL38/RPL35/RPS10/RPL36A/RPS3A/RPS13/RPL15/RPS4X/RPS2/RPL26/RPL37A/RPSA/RPL41/RPLP0	65
GO:0000184	nuclear-transcribed mRNA catabolic process, nonsense-mediated decay	66/1705	118/16374	2.16093e-34	3.63901e-31	3.2141e-31	RNPS1/PABPC1/ETF1/RPL10A/RPL12/EIF4G1/RBM8A/NCBP2/RPL31/RPL22/RPL5/RPS20/PPP2R1A/RPL14/RPS25/RPL37/RPS6/RPL23/RPL23A/RPS3/RPS12/RPL6/RPL27A/RPLP2/RPS23/RPL11/RPL21/RPS17/RPL29/RPS7/RPL9/RPL30/RPS26/RPL7/RPL4/RPL13/RPL24/RPL19/RPS15A/RPL27/RPL34/RPS11/RPS14/RPS16/RPL35A/RPL8/RPS24/RPL10/RPS9/RPL7A/RPS27/RPS21/RPL38/RPL35/RPS10/RPL36A/RPS3A/RPS13/RPL15/RPS4X/RPS2/RPL26/RPL37A/RPSA/RPL41/RPLP0	66
GO:0043043	peptide biosynthetic process	115/1705	328/16374	8.78601e-34	1.10967e-30	9.80103e-31	MAPK1/EIF3H/ILF3/LARP1/EIF3A/CAPRIN1/EIF3M/PABPC1/DDX3X/NPM1/EIF3L/EIF2S2/EIF5/EIF3J/SYNCRIP/EIF3K/ZNF706/CIRBP/APP/EIF3F/MKNK2/RPL10A/CPEB3/NARS/MTPN/RACK1/EIF4A1/AKT1/EIF4H/RPL12/RHOA/EIF1AX/PAIP1/EIF4G1/NOLC1/RBM8A/AIMP2/PURA/TUFM/RPL31/RPL22/RPL5/RPS20/EIF4G2/RPL14/RPS25/EIF4A2/RPL37/EIF3I/TRMT112/RPS6/EIF1/RPL23/NCL/PPA1/RNF139/RPL23A/SOX4/EIF3G/VIM/RPS3/EIF1B/RPS12/LARP6/RPL6/RPL27A/PA2G4/R…	115
GO:0019080	viral gene expression	60/1705	111/16374	2.91864e-30	2.949e-27	2.60466e-27	RANBP2/RPL10A/RPL12/RPL31/RPL22/RPL5/RPS20/RPL14/RPS25/RPL37/RPS6/RPL23/RPL23A/RPS3/RPS12/RPL6/RPL27A/RPLP2/RPS23/RPL11/RPL21/RPS17/RPL29/RPS7/RPL9/RPL30/RPS26/RPL7/RPL4/RPL13/RPL24/RPL19/RPS15A/RPL27/RPL34/RPS11/RPS14/RPS16/RPL35A/RPL8/RPS24/RPL10/RPS9/RPL7A/RPS27/RPS21/RPL38/RPL35/RPS10/RPL36A/RPS3A/RPS13/RPL15/RPS4X/RPS2/RPL26/RPL37A/RPSA/RPL41/RPLP0	60
GO:0019083	viral transcription	68/1705	149/16374	2.63037e-28	2.21477e-25	1.95616e-25	RANBP2/POLR2B/POLR2A/RPL10A/RPL12/TRIM8/NELFB/RPL31/RPL22/RPL5/RPS20/RPL14/RPS25/RPL37/RPS6/POLR2E/RPL23/RPL23A/GTF2F1/RPS3/IFITM3/RPS12/RPL6/RPL27A/RPLP2/RPS23/RPL11/RPL21/RPS17/RPL29/RPS7/RPL9/RPL30/RPS26/RPL7/RPL4/RPL13/RPL24/RPL19/RPS15A/RPL27/RPL34/RPS11/RPS14/RPS16/POLR2L/RPL35A/RPL8/RPS24/RPL10/RPS9/RPL7A/RPS27/RPS21/RPL38/RPL35/RPS10/RPL36A/RPS3A/RPS13/RPL15/RPS4X/RPS2/RPL26/RPL37A/RPSA/R…	68
GO:0006412	translation	132/1705	471/16374	1.64863e-27	1.18984e-24	1.05091e-24	MAPK1/EIF3H/ILF3/LARP1/EIF3A/CAPRIN1/EIF3M/PABPC1/DDX3X/NPM1/EIF3L/EIF2S2/EIF5/EIF3J/SYNCRIP/EIF3K/ZNF706/RRBP1/CIRBP/MRPL20/ABCF1/APP/EIF3F/MKNK2/RPL10A/CPEB3/NARS/MTPN/CPEB2/MRPS21/RACK1/MRPL19/EIF4A1/AKT1/EIF4H/PABPC4/RPL12/RHOA/EIF1AX/PAIP1/EIF4G1/MRPL52/NOLC1/RBM8A/AIMP2/PURA/TUFM/RPL31/RPL22/RPL36AL/RPL5/RPS20/EIF4G2/RPL14/RPS25/EIF4A2/RPL37/EIF3I/TRMT112/RPS6KB2/RPS6/EIF1/RPL23/MRPS18B/NCL…	132
GO:0042773	ATP synthesis coupled electron transport	47/1705	80/16374	3.79078e-26	2.39387e-23	2.11436e-23	NDUFS1/NDUFV1/MT-CO1/NDUFS6/MT-ND2/MT-CYB/MT-CO3/NDUFB6/MT-ND5/COX7A2L/NDUFA5/MT-CO2/MT-ND4/NDUFS2/NDUFB4/MT-ND1/NDUFAB1/NDUFB2/COX7B/UQCRFS1/NDUFA12/COX6C/NDUFS8/NDUFB9/UQCRC1/NDUFS7/NDUFS3/NDUFB3/UQCRH/NDUFB5/NDUFA4/NDUFB7/MT-ND3/NDUFC1/MT-ND4L/NDUFB1/COX5A/NDUFS5/UQCRQ/UQCR10/COX5B/COX6B1/COX4I1/NDUFA1/COX7C/UQCR11/UQCRB	47
GO:0042775	mitochondrial ATP synthesis coupled electron transport	47/1705	83/16374	3.56257e-25	1.99979e-22	1.76628e-22	NDUFS1/NDUFV1/MT-CO1/NDUFS6/MT-ND2/MT-CYB/MT-CO3/NDUFB6/MT-ND5/COX7A2L/NDUFA5/MT-CO2/MT-ND4/NDUFS2/NDUFB4/MT-ND1/NDUFAB1/NDUFB2/COX7B/UQCRFS1/NDUFA12/COX6C/NDUFS8/NDUFB9/UQCRC1/NDUFS7/NDUFS3/NDUFB3/UQCRH/NDUFB5/NDUFA4/NDUFB7/MT-ND3/NDUFC1/MT-ND4L/NDUFB1/COX5A/NDUFS5/UQCRQ/UQCR10/COX5B/COX6B1/COX4I1/NDUFA1/COX7C/UQCR11/UQCRB	47
GO:0000398	mRNA splicing, via spliceosome	81/1705	287/16374	1.75051e-17	8.84359e-15	7.81097e-15	HNRNPH1/SRSF11/PAPOLA/HNRNPA2B1/SON/KHDRBS1/HNRNPR/PNN/HNRNPU/HNRNPH3/SRRM1/SNRNP200/POLR2B/SF3B1/TXNL4A/HNRNPUL1/SNRNP70/RNPS1/PABPC1/DDX17/PCF11/DDX5/SYNCRIP/SRRM2/SRSF2/PSIP1/HNRNPK/SRSF3/STRAP/KHDRBS3/POLR2A/RBM10/ZBTB7A/SNRPD1/SF3B2/PABPN1/SNU13/SNRPE/SNRPA1/SNRPG/SNRPN/WBP11/CWC15/PLRG1/BCAS2/HNRNPA1/RBM8A/DNAJC8/PDCD7/NCBP2/PTBP1/YBX1/IK/LSM5/DDX39A/U2AF2/SRSF9/LSM7/PCBP1/SNRPB2/SLU7/RBM15…	81
GO:0006120	mitochondrial electron transport, NADH to ubiquinone	30/1705	54/16374	3.06397e-16	1.4072e-13	1.24289e-13	NDUFS1/NDUFV1/NDUFS6/MT-ND2/PARK7/NDUFB6/MT-ND5/NDUFA5/MT-ND4/NDUFS2/NDUFB4/MT-ND1/NDUFAB1/NDUFB2/NDUFA12/NDUFS8/NDUFB9/NDUFS7/NDUFS3/NDUFB3/NDUFB5/NDUFA4/NDUFB7/MT-ND3/NDUFC1/MT-ND4L/NDUFB1/NDUFS5/PINK1/NDUFA1	30
GO:0031175	neuron projection development	101/1705	456/16374	9.92915e-14	4.18017e-11	3.69208e-11	ABI2/UBA6/VAPA/SCARB2/CAMSAP2/HERC1/TOP2B/HDGFL3/MAPT/RAPGEF2/PTPRS/BAIAP2/CAPRIN1/SNX3/KIDINS220/CCDC88A/DPYSL3/CRK/ACTR2/CRMP1/ACSL4/GNAO1/PLXNB2/NCS1/ITGA6/PRKCI/MAP6/NPTN/UBE2V2/HDAC2/APP/NRP1/STMN2/BTBD8/FGFR2/WDR5/CRKL/PAK1/AKT1/NEGR1/DDX56/RHOA/ULK1/FKBP4/MICALL2/NUMBL/ATL1/FEZ1/NTRK2/TMEM106B/TMEM30A/NR2F1/BRSK2/CDKL5/ACAP3/LRP8/BRSK1/STK11/EPB41L3/S100A6/APOE/DSCAM/CNTNAP2/SLC9A6/GJA1/RA…	101
GO:0006457	protein folding	44/1705	126/16374	1.25486e-13	4.8766e-11	4.30718e-11	CSNK2A1/RANBP2/DNAJB6/SNRNP70/CCT4/GNB1/MLEC/GNAO1/GNG2/CCT2/GNB4/CCT3/PDIA3/PDCD5/CCT5/CCT8/CCT6A/CLPX/ERP29/FKBP4/ERO1B/MESD/TCP1/PDIA6/DERL1/CANX/GNAI2/PFDN5/PFDN2/CRYAB/PPIA/RUVBL2/BAG4/CCT7/UBXN1/PRKCSH/DNAJA1/DNAJB2/GNAI1/GRN/HSPA5/CALR/HSPA8/GNB2	44
GO:0032981	mitochondrial respiratory chain complex I assembly	27/1705	64/16374	4.46322e-11	1.61058e-08	1.42252e-08	NDUFS1/NDUFV1/NDUFS6/MT-ND2/NDUFB6/MT-ND5/NDUFAF8/NDUFA5/MT-ND4/NDUFS2/NDUFB4/MT-ND1/NDUFAB1/NDUFB2/NDUFA12/NDUFS8/NDUFB9/NDUFS7/NDUFS3/NDUFB3/NDUFB5/NDUFB7/MT-ND3/NDUFC1/NDUFB1/NDUFS5/NDUFA1	27
GO:0050821	protein stabilization	48/1705	169/16374	5.09533e-11	1.71611e-08	1.51573e-08	UBE2B/PTGES3/CCT4/SEL1L/HSP90AA1/LAMP2/ZSWIM7/HSPD1/USP7/CCT2/LAMP1/FLNA/CCT3/CCT5/CCT8/PARK7/CCT6A/TCP1/STXBP1/CLU/RPL5/PPIB/ATP1B1/CRYAB/ATP1B2/NOP53/BAG6/RPL23/CAMLG/CCT7/CHP1/PHB2/EPHA4/SOX4/RASSF2/DVL1/HSPA1B/RTN4/PIN1/RPL11/HSP90AB1/RPS7/GRN/PHB/CALR/PINK1/HSPA1A/MT3	48
GO:0030163	protein catabolic process	56/1705	217/16374	8.15867e-11	2.5761e-08	2.2753e-08	CSNK2A1/USP14/DDB1/MYCBP2/SNRNP70/SNX3/PSMC6/LNPEP/HSP90AA1/PTTG1IP/TMF1/LPCAT1/LAMP2/EZR/CTSA/AZIN1/VPS35/CDK5RAP3/FLNA/ODC1/NFE2L1/DDRGK1/SORL1/AKT1/CLPX/PSMD3/CTSL/LGMN/CLU/PSMD2/PPT1/VPS28/P2RX7/HMGCR/OAZ2/RNF41/APOE/ATP13A2/GJA1/SOX9/RELA/GRIN2A/NUPR1/GABARAPL2/FZR1/PIN1/HSP90AB1/ADGRB1/EEF1A2/PHB/NRG1/PINK1/HSPA8/GFAP/CTSB/UBB	56
GO:0042407	cristae formation	17/1705	30/16374	5.86067e-10	1.69333e-07	1.4956e-07	APOO/ATP5MC2/MT-ATP6/ATP5F1A/ATP5PB/ATP5MC1/CHCHD10/ATP5MG/ATP5ME/ATP5MC3/ATP5PD/C19orf70/ATP5PF/ATP5F1B/PINK1/ATP5F1D/ATP5MF	17
GO:0010498	proteasomal protein catabolic process	46/1705	169/16374	6.03323e-10	1.69333e-07	1.4956e-07	USP14/DDB1/CSNK1D/SEL1L/PSMC6/TMF1/USP7/UBE2V2/NFE2L1/SEC61B/DDRGK1/SELENOS/SDCBP/RBX1/RACK1/PARK7/AKT1/GIPC1/DERL1/TRIB2/CLU/HERPUD1/RNF41/PRPF19/NOP53/AUP1/BAG6/APOE/STUB1/CAMLG/UBXN1/KEAP1/DVL1/NUPR1/GABARAPL2/CSNK1E/USP5/RPL11/HSP90AB1/DNAJB2/DDA1/PINK1/MAP1A/UBB/HSPA1A/HSP90B1	46
GO:0008380	RNA splicing	46/1705	171/16374	9.17905e-10	2.44066e-07	2.15568e-07	HNRNPH1/SRSF11/SON/PPIG/HNRNPH3/SRRM1/AKAP8L/SUGP2/CLK1/SNRNP70/SYNCRIP/PTBP3/SRSF2/HNRNPLL/PRPF38B/POLR2A/RBM10/SNRPD1/SF3B2/IVNS1ABP/SNRPA1/SNRPG/SNRPN/THOC7/BCAS2/PDCD7/NCBP2/PTBP1/SCAF1/NONO/PPP2R1A/RRAGC/U2AF2/KHSRP/SAP18/SNRPD2/TMBIM6/JMJD6/AHNAK/SNRPB/LSM4/RBFOX1/FASTK/RPS26/RPS13/HSPA1A	46
GO:0021762	substantia nigra development	20/1705	43/16374	1.82471e-09	4.60921e-07	4.07102e-07	YWHAQ/YWHAE/GNB4/CDC42/NDRG2/RHOA/ATP5PB/MAOB/DYNLL1/NDUFS3/YWHAH/ATP5PF/CALM3/HSPA5/ACTB/COX6B1/CALM1/CNP/PLP1/CKB	20
GO:0048812	neuron projection morphogenesis	77/1705	373/16374	2.79586e-09	6.72605e-07	5.94069e-07	ABI2/MAPK1/PPP3CB/RAPGEF2/PTPN11/BAIAP2/CAPRIN1/RAB21/ALCAM/CHN1/HSP90AA1/CHL1/ACTR2/EZR/CRMP1/STK25/SPTAN1/CDC42/SPTBN1/DPYSL2/NRP1/SYNGAP1/GRB2/SARM1/DDR1/SH3KBP1/CPNE1/SKIL/PAK1/RHOA/DLG4/FEZ1/NTRK2/BRSK2/STXBP1/CDKL5/PLXNA3/LRP8/SEMA4D/DPYSL5/GDI1/SLIT2/BRSK1/RAP2A/STK11/OBSL1/EPB41L3/DSCAM/DAB1/CNTNAP2/SLC9A6/GJA1/EPHA4/PTPRO/MAP1B/DVL1/GPC1/EPHA5/RTN4/LINGO1/DOK6/HSP90AB1/YWHAH/PAK3/GRIN1/R…	77
GO:0002446	neutrophil mediated immunity	93/1705	488/16374	4.79733e-09	1.10164e-06	9.73008e-07	VAPA/MAPK1/KPNB1/SLC44A2/DNAJC5/STXBP3/DDX3X/DYNC1H1/HSP90AA1/MLEC/CD47/LPCAT1/LAMP2/ACTR2/CCT2/SPTAN1/CTSA/LAMTOR1/LAMP1/BRI3/CPNE3/WDR1/PDXK/XRCC6/PSMB1/SCAMP1/SDCBP/SURF4/CPNE1/PAFAH1B2/CCT8/RAB14/COTL1/DPP7/RHOA/FABP5/PSMD3/PSMD7/CAP1/PDAP1/TIMP2/PFKL/DEGS1/TMEM30A/PKM/ASAH1/TOLLIP/ILF2/PSMD2/SIRPA/DYNLL1/FTL/CSTB/DDOST/GAA/GSN/PPIA/RAC1/SYNGR1/MVP/TMBIM1/ATP8A1/CYB5R3/GSTP1/CD63/METTL7A/PTPR…	93
GO:0006123	mitochondrial electron transport, cytochrome c to oxygen	12/1705	17/16374	5.88257e-09	1.29212e-06	1.14125e-06	MT-CO1/MT-CO3/COX7A2L/MT-CO2/COX7B/COX6C/NDUFA4/COX5A/COX5B/COX6B1/COX4I1/COX7C	12
GO:0043312	neutrophil degranulation	92/1705	484/16374	6.63421e-09	1.3965e-06	1.23344e-06	VAPA/MAPK1/KPNB1/SLC44A2/DNAJC5/STXBP3/DDX3X/DYNC1H1/HSP90AA1/MLEC/CD47/LPCAT1/LAMP2/ACTR2/CCT2/SPTAN1/CTSA/LAMTOR1/LAMP1/BRI3/CPNE3/PDXK/XRCC6/PSMB1/SCAMP1/SDCBP/SURF4/CPNE1/PAFAH1B2/CCT8/RAB14/COTL1/DPP7/RHOA/FABP5/PSMD3/PSMD7/CAP1/PDAP1/TIMP2/PFKL/DEGS1/TMEM30A/PKM/ASAH1/TOLLIP/ILF2/PSMD2/SIRPA/DYNLL1/FTL/CSTB/DDOST/GAA/GSN/PPIA/RAC1/SYNGR1/MVP/TMBIM1/ATP8A1/CYB5R3/GSTP1/CD63/METTL7A/PTPRN2/FT…	92
GO:0006754	ATP biosynthetic process	19/1705	42/16374	8.27961e-09	1.67314e-06	1.47778e-06	ENO1/ATP5MC2/MT-ATP6/ATP5F1A/MT-CO2/ATP5PB/PKM/ATP5MC1/ATP5MG/PARP1/ATP5ME/ATP5MC3/ATP5PD/ATP5PF/ATP5F1B/PINK1/ATP5F1D/ATP5MF/TMSB4X	19
GO:0042776	mitochondrial ATP synthesis coupled proton transport	13/1705	21/16374	1.47565e-08	2.86729e-06	2.53249e-06	ATP5MC2/MT-ATP6/ATP5F1A/ATP5PB/ATP5MC1/ATP5MG/ATP5ME/ATP5MC3/ATP5PD/ATP5PF/ATP5F1B/ATP5F1D/ATP5MF	13
GO:0002444	myeloid leukocyte mediated immunity	92/1705	494/16374	1.86643e-08	3.46983e-06	3.06468e-06	VAPA/MAPK1/KPNB1/SLC44A2/DNAJC5/STXBP3/DDX3X/DYNC1H1/HSP90AA1/MLEC/CD47/LPCAT1/LAMP2/ACTR2/CCT2/SPTAN1/CTSA/LAMTOR1/LAMP1/BRI3/CPNE3/PDXK/XRCC6/PSMB1/SCAMP1/SDCBP/SURF4/CPNE1/PAFAH1B2/CCT8/RAB14/COTL1/DPP7/RHOA/FABP5/PSMD3/PSMD7/CAP1/PDAP1/TIMP2/PFKL/DEGS1/TMEM30A/PKM/ASAH1/TOLLIP/ILF2/PSMD2/SIRPA/DYNLL1/FTL/CSTB/DDOST/GAA/GSN/PPIA/RAC1/SYNGR1/MVP/TMBIM1/ATP8A1/CYB5R3/GSTP1/CD63/METTL7A/PTPRN2/FT…	92
GO:0007409	axonogenesis	62/1705	288/16374	1.9231e-08	3.46983e-06	3.06468e-06	MAPK1/PPP3CB/TOP2B/PTPN11/BAIAP2/CHN1/HSP90AA1/CHL1/EZR/CRMP1/STK25/SPTAN1/SPTBN1/DPYSL2/APP/NRP1/SYNGAP1/GRB2/SH3KBP1/FGFR2/SKIL/RHOA/NUMBL/ATL1/FEZ1/NTRK2/BRSK2/STXBP1/DPYSL5/GDI1/SLIT2/BRSK1/STK11/S100A6/DSCAM/DAB1/SLC9A6/APBB1/EPHA4/PTPRO/MAP1B/DVL1/S100B/GPC1/EPHA5/RTN4/LINGO1/DOK6/HSP90AB1/STMN1/PAK3/ADCY1/GRIN1/ADGRB1/RAP1GAP/METRN/UNC5C/SEMA3C/CNP/SHTN1/ARHGDIA/ANK3	62
GO:0061024	membrane organization	43/1705	173/16374	4.10938e-08	7.15883e-06	6.32293e-06	SCARB2/YWHAQ/CLTC/ARPC2/YWHAE/FNBP1L/CCDC88A/CLTA/ACTR2/PRKCI/SYNJ1/GRB2/SH3KBP1/ATP2A2/ARPC3/NLGN2/DLG4/DNAJC6/YWHAZ/P2RX7/EPN1/SYT11/GLRB/APOE/VAMP3/TGOLN2/SYT1/CHP1/DVL1/NRXN2/ARPC5/AP2M1/AP2S1/YWHAG/YWHAH/YWHAB/CLTB/UBC/ACTB/HSPA8/UBB/REEP1/SGCZ	43
GO:0120036	plasma membrane bounded cell projection organization	52/1705	231/16374	5.82333e-08	9.80649e-06	8.66144e-06	SCARB2/RAPGEF2/PTPRS/SNX3/KIDINS220/CCDC88A/DPYSL3/CRMP1/PLXNB2/NCS1/ITGA6/PRKCI/NPTN/UBE2V2/HDAC2/STMN2/PAK1/AKT1/NEGR1/DDX56/RHOA/FKBP4/FEZ1/NTRK2/TMEM30A/NR2F1/BRSK2/ACAP3/BRSK1/EPB41L3/APOE/CNTNAP2/SLC9A6/GJA1/APBB1/EPHA4/RIT2/VIM/PTPRO/CNR1/EFNB2/B2M/HSPA5/ZNF804A/TENM3/IL1RAPL1/LGALS1/CAMK2B/SHTN1/UBB/NDRG4/MT3	52
GO:1903405	protein localization to nuclear body	8/1705	9/16374	1.11277e-07	1.75678e-05	1.55165e-05	CCT4/CCT2/CCT3/CCT5/CCT8/CCT6A/TCP1/CCT7	8
GO:1904871	positive regulation of protein localization to Cajal body	8/1705	9/16374	1.11277e-07	1.75678e-05	1.55165e-05	CCT4/CCT2/CCT3/CCT5/CCT8/CCT6A/TCP1/CCT7	8
GO:0070997	neuron death	61/1705	297/16374	1.49059e-07	2.28196e-05	2.0155e-05	MAPT/TMEM259/DNAJC5/CHL1/DDIT3/PRKCI/VPS35/UBE2V2/BACE1/LANCL1/NRP1/SYNGAP1/SARM1/NCOA7/SORL1/PARK7/OXR1/JUN/AKT1/EGLN1/RHOA/PPP1R13B/EIF4G1/AIMP2/KRAS/NTRK2/ATF4/STXBP1/REL/LGMN/CLU/HMOX1/PPT1/CSF1/NES/APOE/ATP13A2/PARP1/UBE2M/CHP1/BAX/CEBPB/EFNB2/CDC34/NUPR1/SOD1/SET/PIN1/HSP90AB1/PAK3/GRN/GRIN1/DDIT4/NSMF/PINK1/FIS1/GABRB3/EPHA7/UBB/PRNP/MT3	61
GO:0061564	axon development	31/1705	110/16374	1.57412e-07	2.33896e-05	2.06585e-05	CAMSAP2/TOP2B/MAPT/RGMA/PTPRS/BAIAP2/INPP5F/PTPRF/APP/NRP1/DDR1/FGFR2/NUMBL/ATL1/BRSK2/BRSK1/STK11/S100A6/APBB1/EPHA4/CNR1/S100B/RTN4/STMN1/PAK3/GRN/ADCY1/ADGRB1/CNP/SHTN1/ANK3	31
GO:0043161	proteasome-mediated ubiquitin-dependent protein catabolic process	51/1705	232/16374	1.72775e-07	2.49388e-05	2.20268e-05	USP14/UBE2B/PPP2CB/DDB1/CSNK1D/PSMC6/DDIT3/USP7/UBE2V2/DDRGK1/PSMB1/SDCBP/RBX1/RACK1/PARK7/AKT1/GIPC1/PSMD3/PSMD7/AGAP3/SGTA/TRIB2/CLU/PSMB4/PSMD8/PSMD2/PSMB5/HERPUD1/TOPORS/PSMA7/PSMA4/FBXW5/NOP53/BAG6/TNFAIP1/STUB1/CAMLG/UBXN1/PSMB3/KEAP1/CDC34/DVL1/BCAP31/CSNK1E/USP5/RPL11/HSP90AB1/DNAJB2/DDA1/MAP1A/HSPA1A	51
GO:0034976	response to endoplasmic reticulum stress	32/1705	117/16374	2.13036e-07	2.98961e-05	2.64053e-05	PPP2CB/SEL1L/UFM1/DDIT3/NFE2L1/SEC61B/DDRGK1/SELENOS/OS9/RACK1/P4HB/ATP2A2/PARK7/ERP29/DERL1/ATF4/CLU/HERPUD1/SERINC3/AUP1/BAG6/TMBIM6/UFC1/BAX/UBXN1/CEBPB/NUPR1/SCAMP5/PPP1R15A/HSPA1A/HSP90B1/RASGRF2	32
GO:0043488	regulation of mRNA stability	30/1705	106/16374	2.24205e-07	3.0613e-05	2.70385e-05	PSMC6/PABPC1/ZFP36L1/SERBP1/PSMB1/AKT1/PABPC4/ZFP36L2/ALKBH5/PSMD3/PSMD7/EIF4G1/YWHAZ/PSMB4/PSMD8/PSMD2/PSMB5/PSMA7/PSMA4/KHSRP/EXOSC6/PSMB3/VIM/SET/YWHAB/UBC/HSPA8/HSPB1/UBB/HSPA1A	30
GO:0042026	protein refolding	11/1705	18/16374	2.40428e-07	3.19642e-05	2.82319e-05	SNRNP70/HSP90AA1/HSPD1/DNAJA4/DNAJA2/HSPA1B/DNAJB2/B2M/HSPA8/HSPA6/HSPA1A	11
GO:1904874	positive regulation of telomerase RNA localization to Cajal body	10/1705	15/16374	2.68275e-07	3.47519e-05	3.06941e-05	CCT4/CCT2/CCT3/CCT5/CCT8/CCT6A/TCP1/RUVBL2/CCT7/NOP10	10
GO:0002181	cytoplasmic translation	15/1705	33/16374	2.89607e-07	3.65773e-05	3.23064e-05	RPL10A/CPEB2/RPL31/RPL6/RPS23/RPL11/RPL30/RPS26/RPL24/RPL19/RPL8/RPS21/RPL38/RPL36A/RPL41	15
GO:0006397	mRNA processing	50/1705	230/16374	3.26358e-07	4.02137e-05	3.55182e-05	SRSF11/PAPOLA/HNRNPA2B1/SON/KHDRBS1/HNRNPR/AKAP8L/SF3B1/RBBP6/TXNL4A/SUGP2/SNRNP70/RNPS1/ZFP36L1/PTBP3/CNOT6L/SRSF2/HNRNPLL/PRPF38B/HNRNPK/SRSF3/STRAP/KHDRBS3/RBM10/SNRPD1/CDK11B/SF3B2/SNRPE/ALKBH5/SNRPG/NCBP2/PTBP1/SCAF1/NONO/LSM5/U2AF2/SRSF9/KHSRP/SAP18/SNRPD2/HNRNPA0/ELAVL4/PRPF19/PDE12/JMJD6/SNRPB/LSM3/RBFOX1/HSPA8/ADARB2	50
GO:0050808	synapse organization	42/1705	180/16374	3.84428e-07	4.62412e-05	4.08419e-05	MAPT/PTPRS/PCDH17/PTPRF/CNKSR2/GRIPAP1/DAG1/UBE2V2/APP/NRP1/CLSTN1/NLGN2/YWHAZ/NTRK2/LRRC4B/SLITRK2/ADGRL1/CDH8/SLC9A6/ADGRB2/LRRN3/SPARCL1/EPHA4/PTPRO/EFNB2/DVL1/PIN1/SPARC/NDRG1/PAK3/LINGO2/LRFN5/GRIN1/ADGRB1/IL1RAPL1/CNTN5/LRFN4/TUBB/CAMK2B/EPHA7/ASIC2/PTPRD	42
GO:0017156	calcium-ion regulated exocytosis	16/1705	38/16374	4.24367e-07	4.98582e-05	4.40366e-05	PPP3CB/STXBP3/ARF1/ATP2A2/STXBP1/GNAI2/RAPGEF4/VAMP3/SYT1/CHP1/CBARP/SDF4/SCAMP5/SYT4/RIMS1/RIMS2	16
GO:1904851	positive regulation of establishment of protein localization to telomere	8/1705	10/16374	5.05164e-07	5.67131e-05	5.0091e-05	CCT4/CCT2/CCT3/CCT5/CCT8/CCT6A/TCP1/CCT7	8
GO:1904867	protein localization to Cajal body	8/1705	10/16374	5.05164e-07	5.67131e-05	5.0091e-05	CCT4/CCT2/CCT3/CCT5/CCT8/CCT6A/TCP1/CCT7	8
GO:0061684	chaperone-mediated autophagy	10/1705	16/16374	6.48316e-07	7.1202e-05	6.28881e-05	SNRNP70/HSP90AA1/LAMP2/CTSA/CLU/ATP13A2/STUB1/EEF1A2/HSPA8/GFAP	10
GO:0048167	regulation of synaptic plasticity	25/1705	85/16374	1.02249e-06	0.000109906	9.70733e-05	PPP3CB/MAPT/RAPGEF2/BAIAP2/NPTN/APP/SQSTM1/SYNGAP1/CPEB3/KAT2A/GIPC1/LGMN/BRSK1/SORCS3/APOE/EPHA4/GRIN2A/YWHAG/FAM107A/YWHAH/ADCY1/GRIN1/ADGRB1/MAP1A/PRNP	25
GO:0030901	midbrain development	24/1705	81/16374	1.44489e-06	0.000152075	0.000134318	YWHAQ/YWHAE/FZD3/GNB4/CDC42/NDRG2/FGFR2/KAT2A/RHOA/ATP5PB/MAOB/DYNLL1/NDUFS3/YWHAH/ATP5PF/CALM3/HSPA5/UQCRQ/ACTB/COX6B1/CALM1/CNP/PLP1/CKB	24
GO:0051649	establishment of localization in cell	49/1705	235/16374	1.54945e-06	0.000159752	0.000141098	KIF5B/PREPL/PPP3CB/DNAJC5/DYNC1H1/NUMA1/NCS1/BACE1/SYNJ1/HMGN3/MLC1/GIPC1/PRKAR1B/ERC2/CANX/BRSK2/STXBP1/BSN/P2RX7/HMGCR/YKT6/CRYAB/RAC1/SYT11/RAPGEF4/TMBIM6/REEP2/SYT1/KCNMB4/UNC13A/MAP1B/DVL1/EPHA5/STX3/SYN3/GIT1/CSPG5/SYT4/ADCY1/CALM3/GRIN1/ACTB/PHPT1/ADCY5/RIMS1/SV2A/STXBP5L/REEP1/PRKCB	49
GO:0001732	formation of cytoplasmic translation initiation complex	9/1705	14/16374	1.73457e-06	0.000175261	0.000154797	EIF3H/EIF3A/EIF3M/EIF3L/EIF3J/EIF3K/EIF3F/EIF3I/EIF3G	9
GO:0090670	RNA localization to Cajal body	10/1705	18/16374	2.91015e-06	0.000279258	0.00024665	CCT4/CCT2/CCT3/CCT5/CCT8/CCT6A/TCP1/RUVBL2/CCT7/NOP10	10
GO:0090672	telomerase RNA localization	10/1705	18/16374	2.91015e-06	0.000279258	0.00024665	CCT4/CCT2/CCT3/CCT5/CCT8/CCT6A/TCP1/RUVBL2/CCT7/NOP10	10
GO:0007268	chemical synaptic transmission	59/1705	309/16374	2.92966e-06	0.000279258	0.00024665	KIF5B/USP14/MAPK1/AKAP9/PTPRS/GLS/DNAJC5/NISCH/PCDH17/SLC6A1/ATP1A2/APP/DNM1/SDCBP/PARK7/NLGN2/GLUL/GIPC1/PRKAR1B/DLG4/PPFIA2/KRAS/STXBP1/GRM3/BSN/LRP8/GNAI2/PPT1/BRSK1/PRKAR2B/GLRB/KCNQ2/PLCL1/SYT1/PTPRN2/KCNMB4/UNC13A/SYPL1/RIT2/CNR1/DVL1/GRIN2A/NRXN2/SYN3/HOMER1/GNAI1/CA2/TUBB2B/PINK1/HSPA8/GRM7/RIMS1/CNP/RIMS2/ASIC2/KIF5A/FGF12/CACNA1B/PLP1	59
GO:0044839	cell cycle G2/M phase transition	38/1705	168/16374	3.02613e-06	0.000283111	0.000250054	AKAP9/AKAP8L/CSNK1D/YWHAE/PSMC6/DYNC1H1/NPM1/HSP90AA1/DYNC1I2/APP/SMARCD3/PSMB1/PCNT/RBX1/CCP110/FHL1/PSMD3/PSMD7/RAD21/PSMB4/PSMD8/PPP2R1A/PSMD2/PSMB5/ACTR1A/SKP1/DYNLL1/PSMA7/PSMA4/PRKAR2B/PKIA/CTC1/PSMB3/CSNK1E/YWHAG/DCTN3/TUBB/TUBB4B	38
GO:0051402	neuron apoptotic process	45/1705	214/16374	3.22161e-06	0.000295919	0.000261366	DNAJC5/CHL1/ATN1/DDIT3/PRKCI/UBE2V2/BACE1/LANCL1/APP/NRP1/SYNGAP1/PARK7/OXR1/JUN/RHOA/KRAS/NTRK2/ATF4/STXBP1/LGMN/HMOX1/PPT1/NES/BNIP3/UBE2M/BAX/CEBPB/CDC34/NUPR1/SOD1/SET/PIN1/HSP90AB1/CIT/PAK3/GRN/GRIN1/HSPA5/NSMF/PINK1/FIS1/GABRB3/EPHA7/PRNP/MT3	45
GO:0046034	ATP metabolic process	20/1705	63/16374	3.30117e-06	0.000297813	0.000263039	NDUFS1/FAM20C/ATP1A2/ENO1/ATP6V1B2/RHOA/CLPX/MT-CO2/ATP1B1/PDE12/SLC25A23/PARP1/GUK1/NUPR1/HSPA1B/PINK1/HSPA8/HSPA1A/TMSB4X/ATP5IF1	20
GO:0007612	learning	19/1705	58/16374	3.42132e-06	0.000303237	0.00026783	UBA6/PPP3CB/SLC6A1/SYNJ1/APP/VDAC1/JUN/GMFB/DLG4/NTRK2/SORCS3/ATP8A1/CIC/PRKAR2B/CNTNAP2/FGF13/PAK5/SLC24A2/SHANK2	19
GO:0000086	G2/M transition of mitotic cell cycle	44/1705	208/16374	3.50067e-06	0.00030492	0.000269316	KHDRBS1/AKAP9/CSNK1D/YWHAE/PSMC6/DYNC1H1/HSP90AA1/DYNC1I2/APP/SMARCD3/PSMB1/PCNT/RBX1/CCP110/FHL1/PSMD3/PSMD7/RAD21/CDC25B/BRSK2/ARPP19/PSMB4/PSMD8/PPP2R1A/PSMD2/PSMB5/ACTR1A/SKP1/DYNLL1/PSMA7/PSMA4/PRKAR2B/NES/PKIA/CTC1/PSMB3/CSNK1E/OPTN/CIT/YWHAG/DCTN3/CALM3/TUBB/TUBB4B	44
GO:0006986	response to unfolded protein	22/1705	74/16374	3.68746e-06	0.000315746	0.000278878	STT3B/HSPA4/HSP90AA1/HSPD1/DDIT3/CREBRF/CDK5RAP3/SELENOS/MFN2/DERL1/HERPUD1/SERPINH1/STUB1/HSPH1/HSP90AB1/DNAJB1/DNAJA1/DNAJB2/HSPA5/HSPA8/HSPB1/HSPA1A	22
GO:0006122	mitochondrial electron transport, ubiquinol to cytochrome c	8/1705	12/16374	4.58254e-06	0.000374969	0.000331186	MT-CYB/UQCRFS1/UQCRC1/UQCRH/UQCRQ/UQCR10/UQCR11/UQCRB	8
GO:0070199	establishment of protein localization to chromosome	8/1705	12/16374	4.58254e-06	0.000374969	0.000331186	CCT4/CCT2/CCT3/CCT5/CCT8/CCT6A/TCP1/CCT7	8
GO:0048013	ephrin receptor signaling pathway	24/1705	86/16374	4.65024e-06	0.000374969	0.000331186	PTPN11/ARPC2/CHN1/CRK/ACTR2/CDC42/DNM1/SDCBP/ARPC3/PAK1/RHOA/RAC1/EPHA4/EFNB2/EPHA5/ARPC5/GIT1/AP2M1/AP2S1/PAK3/GRIN1/ACTB/EPHA7/EPHA6	24
GO:1990090	cellular response to nerve growth factor stimulus	14/1705	35/16374	4.67598e-06	0.000374969	0.000331186	DYNC1LI2/MAPT/RAPGEF2/SORT1/KIDINS220/CRK/APP/STMN2/ARPC3/AKT1/KAT2A/RAB35/HSPA5/RPL8	14
GO:0090671	telomerase RNA localization to Cajal body	10/1705	19/16374	5.5691e-06	0.000436136	0.000385211	CCT4/CCT2/CCT3/CCT5/CCT8/CCT6A/TCP1/RUVBL2/CCT7/NOP10	10
GO:0097193	intrinsic apoptotic signaling pathway	35/1705	153/16374	5.61141e-06	0.000436136	0.000385211	BCLAF1/DDX3X/PTTG1IP/DDIT3/NACC2/ENO1/SELENOS/SKIL/RACK1/P4HB/PARK7/IVNS1ABP/AKT1/VDAC2/NOC2L/ERP29/CLU/HERPUD1/SERINC3/TMBIM6/NDUFS3/BAX/RPS3/BCAP31/NUPR1/SOD1/RPL11/RPS7/DNAJA1/PINK1/HSPB1/TPT1/FIS1/UBB/HSPA1A	35
GO:0006890	retrograde vesicle-mediated transport, Golgi to endoplasmic reticulum	22/1705	76/16374	5.9832e-06	0.000457987	0.00040451	KIF2A/KIFAP3/TMED10/KIF3A/ARFGAP1/KIF3B/COPZ1/KLC1/SURF4/TAPBP/TMED3/KIF1C/ARCN1/TMED2/KIF3C/BICD2/LMAN2/TMED9/PICK1/COPE/RAB6B/KIF5A	22
GO:0002183	cytoplasmic translational initiation	11/1705	23/16374	6.22576e-06	0.000462582	0.000408569	EIF3H/EIF3A/EIF3M/EIF3L/EIF5/EIF3J/EIF3K/EIF3F/MCTS1/EIF3I/EIF3G	11
GO:0007420	brain development	56/1705	295/16374	6.22636e-06	0.000462582	0.000408569	ATRX/CHD8/TOP2B/RAPGEF2/PTPN11/ACSL3/BAIAP2/STXBP3/UFM1/ADGRG1/GNAO1/PLXNB2/DPYSL2/CDK5RAP3/APP/XRCC6/HMGCS1/SLC4A10/FGFR2/DLC1/SEMA6D/KAT2A/MACO1/PCDH19/FOXG1/CD9/PPT1/MACROD2/ATP2B1/NR2F2/ROGDI/CIC/BAG6/NES/ATP6V0D1/MBOAT7/CNTNAP2/SYT1/MYO1D/SNRPB/UFC1/CSK/GRIN2A/DNAJB1/CST3/SYT4/STMN1/ADCY1/GRIN1/DDIT4/UQCRQ/UNC5C/MBD3/CNP/EPHA7/MT3	56
GO:0097435	supramolecular fiber organization	31/1705	129/16374	6.53136e-06	0.000478209	0.000422371	CAMSAP2/AKAP9/HDGFL3/MAPT/CSNK1D/TPM1/NUMA1/TUBGCP2/AEBP1/APP/STMN2/PARK7/PAK1/FKBP4/PRKAR1A/CLU/ADAMTS3/CRYAB/COLGALT1/RAC1/TUBGCP6/APOE/FGF13/EML2/RPS3/MAP1B/HSP90AB1/CST3/STMN1/HSPA8/CLIP3	31
GO:0000377	RNA splicing, via transesterification reactions with bulged adenosine as nucleophile	23/1705	82/16374	6.65018e-06	0.000479953	0.000423911	HNRNPA2B1/SON/SF3B1/TXNL4A/SNRNP70/RNPS1/HNRNPK/SRSF3/STRAP/KHDRBS3/RBM10/SNRPD1/SNRPE/SNRPG/PTBP1/U2AF2/SRSF9/SAP18/SNRPD2/PRPF19/JMJD6/SNRPB/HSPA8	23
GO:0000904	cell morphogenesis involved in differentiation	37/1705	167/16374	6.75523e-06	0.000480668	0.000424543	TOP2B/PTPN11/ARPC2/BAIAP2/KIDINS220/CRK/CDC42/MAP6/WDR1/FLNA/APP/NRP1/FGFR2/CRKL/NUMBL/ATL1/TMEM106B/BRSK2/BRSK1/RAC1/STK11/S100A6/DSCAM/APBB1/DVL1/S100B/S100A10/CSPG5/STMN1/PAK3/ADCY1/DOCK5/ADGRB1/CALR/CNP/SHTN1/ANK3	37
GO:0043687	post-translational protein modification	63/1705	346/16374	6.94737e-06	0.000487474	0.000430554	KTN1/FAM20C/MIA3/DCAF7/DDB1/KLHL5/STT3B/PSMC6/SPP1/GOLM1/FBXO21/KLHL2/KLHL21/APP/APLP2/PSMB1/IGFBP7/COPS6/WDR5/ANO8/RBX1/P4HB/ELOC/PSMD3/PSMD7/PDIA6/PSMB4/PSMD8/PSMD2/PSMB5/SKP1/GPS1/PSMA7/CSF1/PSMA4/FBXW5/OBSL1/SHISA5/APOE/WSB2/KLHL9/NUCB1/TGOLN2/UBE2M/SPARCL1/TMEM132A/MGAT4A/RCN1/PSMB3/KEAP1/PRKCSH/TIMP1/RAB11B/GAS6/FEM1B/CST3/DDA1/SCG2/VGF/ELOB/LGALS1/HSP90B1/SCG3	63
GO:0036503	ERAD pathway	15/1705	41/16374	7.90132e-06	0.000546814	0.000482966	USP14/SEL1L/SEC61B/SELENOS/SGTA/DERL1/BRSK2/HERPUD1/AUP1/BAG6/RNF139/UBXN1/BCAP31/UBXN6/HSP90B1	15
GO:0051131	chaperone-mediated protein complex assembly	9/1705	16/16374	8.15848e-06	0.000549555	0.000485386	PTGES3/HSPA4/HSP90AA1/HSPD1/CCT2/CLU/STUB1/HSP90AB1/HSPA1A	9
GO:0070841	inclusion body assembly	9/1705	16/16374	8.15848e-06	0.000549555	0.000485386	DNAJB6/SORL1/CLU/DNAJA4/CDC34/HSPA1B/DNAJB1/DNAJB2/HSPA1A	9
GO:0032446	protein modification by small protein conjugation	34/1705	150/16374	9.37527e-06	0.000623209	0.00055044	NDFIP1/MYCBP2/HSP90AA1/PTTG1IP/CDK5RAP3/PARK7/IVNS1ABP/AKT1/AIMP2/DERL1/RPL5/TOLLIP/HERPUD1/VPS28/U2AF2/STUB1/CAMLG/CHP1/UBXN1/SOX4/RELA/RPS3/HSPA1B/RPL11/HSP90AB1/DNAJA1/FAM107A/DNAJB2/HSPA5/ISG15/ADGRB1/PINK1/UBB/HSPA1A	34
GO:0019538	protein metabolic process	44/1705	216/16374	9.73381e-06	0.000638639	0.000564069	CSNK2A1/DDB1/MYCBP2/SNX3/LPCAT1/AZIN1/HNRNPK/VPS35/FLNA/HDAC2/APP/ODC1/MTPN/SORL1/AKT1/PSMD3/EIF4G1/NUMBL/CLU/PSMD2/VPS28/HMGCR/OAZ2/CSTB/CSF1/RNF41/CRYAB/EDNRB/BAG6/NFKBIA/APOE/GJA1/SOX9/RELA/GRIN2A/FZR1/PIN1/HSP90AB1/CST3/ADGRB1/PHB/NRG1/AURKAIP1/CAMK2N1	44
GO:0006446	regulation of translational initiation	11/1705	24/16374	1.04126e-05	0.000674416	0.000595668	EIF3H/EIF5/EIF3K/EIF4H/EIF4G1/NCBP2/EIF4G2/EIF4A2/EIF1/EIF1B/HSPB1	11
GO:0097061	dendritic spine organization	18/1705	57/16374	1.09997e-05	0.000703422	0.000621287	ABI2/BAIAP2/CAPRIN1/ACTR2/ARF1/VPS35/LRP8/LGMN/ABHD17B/APOE/EPHA4/PICK1/HOMER1/PAK3/ZNF804A/CAMK2B/PRNP/SRCIN1	18
GO:0032435	negative regulation of proteasomal ubiquitin-dependent protein catabolic process	12/1705	30/16374	2.25066e-05	0.00142129	0.00125534	USP7/DDRGK1/SDCBP/PARK7/GIPC1/NOP53/BAG6/CAMLG/UBXN1/RPL11/HSP90AB1/MAP1A	12
GO:0033554	cellular response to stress	46/1705	237/16374	2.28006e-05	0.00142208	0.00125604	MAPK1/BCLAF1/RANBP2/DNAJB6/MAPT/YWHAE/PTGES3/PSMC6/HSP90AA1/NFE2L1/PSMB1/RBX1/EGLN1/ELOC/FKBP4/PSMD3/PSMD7/EIF4G1/KRAS/RSL1D1/CLU/PSMB4/PSMD8/PSMD2/PSMB5/PSMA7/CRYAB/PSMA4/BNIP3/BAG4/HSBP1/HSPH1/PSMB3/NUPR1/HSPA1B/CHCHD2/HSP90AB1/IER5/DNAJB1/UBC/HSPA8/ELOB/CAMK2B/UBB/HSPA1A/YPEL3	46
GO:0046907	intracellular transport	26/1705	106/16374	2.41227e-05	0.0014862	0.00131266	KIF5B/VAPA/DYNC1H1/NUMA1/ARF1/GRIPAP1/BTBD8/PCNT/SORL1/MLC1/RAB14/STXBP1/HMOX1/OAZ2/CRYAB/RANBP1/REEP2/APOE/ATP13A2/RNF139/MAP1B/B3GAT3/INSIG1/CSPG5/TENM1/REEP1	26
GO:0099003	vesicle-mediated transport in synapse	27/1705	113/16374	2.80959e-05	0.00171012	0.00151044	PREPL/DNAJC5/NCS1/VPS35/BACE1/SYNJ1/CLSTN1/GIPC1/PRKAR1B/ERC2/STXBP1/BSN/P2RX7/RAPGEF4/SYT1/DVL1/STX3/SYN3/GIT1/CSPG5/SYT4/ADCY1/CALM3/RIMS1/SV2A/STXBP5L/PRKCB	27
GO:0061077	chaperone-mediated protein folding	10/1705	22/16374	2.90542e-05	0.00173121	0.00152907	CSNK2A1/DNAJC5/PDCD5/FKBP4/SGTA/CLU/PPIB/PDIA4/DNAJB2/HSPB1	10
GO:0019886	antigen processing and presentation of exogenous peptide antigen via MHC class II	24/1705	95/16374	2.91277e-05	0.00173121	0.00152907	DYNC1LI2/KIF2A/CLTC/KIFAP3/DYNC1H1/DYNC1I2/CLTA/KIF3A/ARF1/KIF3B/KLC1/AP1B1/CTSL/CANX/LGMN/ACTR1A/DYNLL1/KIF3C/AP2M1/AP2S1/DCTN3/DYNLL2/DYNC1I1/KIF5A	24
GO:0046785	microtubule polymerization	18/1705	61/16374	3.0999e-05	0.00182101	0.00160838	CAMSAP2/AKAP9/HDGFL3/MAPT/CSNK1D/NUMA1/TUBGCP2/STMN2/PAK1/FKBP4/RAC1/TUBGCP6/FGF13/EML2/RPS3/MAP1B/STMN1/CLIP3	18
GO:0045055	regulated exocytosis	28/1705	120/16374	3.20145e-05	0.00185905	0.00164198	PREPL/DNAJC5/STXBP3/TMED10/NCS1/ARF1/BACE1/SYNJ1/GIPC1/ERC2/STXBP1/GNAI2/SYNGR1/SYT1/CBARP/DVL1/STX3/GIT1/RAB11B/SCAMP5/CSPG5/SYT4/ADCY1/CALM3/RIMS1/SV2A/STXBP5L/PRKCB	28
GO:0016070	RNA metabolic process	17/1705	56/16374	3.41331e-05	0.0019325	0.00170685	HNRNPH1/HNRNPA2B1/HNRNPR/HNRNPU/POLR2B/HNRNPK/POLR2A/HNRNPA1/NCBP2/PTBP1/DDX24/PCBP1/HNRNPA0/POLR2E/GTF2F1/NOVA2/POLR2L	17
GO:0048667	cell morphogenesis involved in neuron differentiation	26/1705	108/16374	3.41709e-05	0.0019325	0.00170685	TOP2B/BAIAP2/KIDINS220/MAP6/APP/FGFR2/NUMBL/ATL1/TMEM106B/BRSK2/BRSK1/STK11/S100A6/DSCAM/APBB1/ID2/DVL1/S100B/SOD1/STMN1/PAK3/ADCY1/ADGRB1/CNP/SHTN1/ANK3	26
GO:0007005	mitochondrion organization	32/1705	146/16374	3.46066e-05	0.0019325	0.00170685	SLC25A36/MAPT/BNIP3L/SLC25A46/VPS35/AGTPBP1/SQSTM1/TOMM70/CLUH/MFN2/PARK7/EIF4G1/ESRRA/P2RX7/CHCHD10/BNIP3/ATP13A2/PARP1/TOMM20/TFAM/PHB2/INF2/TOMM7/SLC25A6/ATP5F1B/PHB/PINK1/CYCS/FIS1/ATP5F1D/TIMM13/CXADR	32
GO:0010976	positive regulation of neuron projection development	25/1705	102/16374	3.48094e-05	0.0019325	0.00170685	SCARB2/RAPGEF2/SNX3/KIDINS220/DPYSL3/PLXNB2/ITGA6/PRKCI/NPTN/UBE2V2/STMN2/NEGR1/DDX56/FEZ1/NTRK2/TMEM30A/APOE/APBB1/RIT2/CNR1/HSPA5/ZNF804A/TENM3/CAMK2B/NDRG4	25
GO:0099054	presynapse assembly	14/1705	41/16374	3.89308e-05	0.00213781	0.00188819	PCDH17/VPS35/APP/NLGN2/EIF4G1/SLITRK2/EFNB2/DVL1/CLSTN3/LRFN5/IL1RAPL1/CNTN5/LRFN4/PTPRD	14
GO:0071456	cellular response to hypoxia	38/1705	187/16374	4.05206e-05	0.00220118	0.00194416	HP1BP3/LMNA/GNB1/PSMC6/BNIP3L/ZFP36L1/PSMB1/RBX1/CPEB2/P4HB/AKT1/EGLN1/ELOC/PSMD3/PSMD7/PSMB4/PSMD8/HMOX1/PSMD2/PSMB5/SLC8A1/PSMA7/PSMA4/NOP53/BNIP3/STUB1/B3GAT1/PHB2/PSMB3/S100B/CHCHD2/NDRG1/IRAK1/UBC/PINK1/ELOB/UBB/MT3	38
GO:0034605	cellular response to heat	27/1705	116/16374	4.60556e-05	0.00247524	0.00218622	MAPK1/RANBP2/DNAJB6/MAPT/YWHAE/PTGES3/HSP90AA1/HDAC2/ATP2A2/FKBP4/HMOX1/CRYAB/SLU7/STUB1/BAG4/HSBP1/HSPH1/ARPP21/HSPA1B/HSP90AB1/IER5/DNAJB1/IRAK1/HSPA8/HSPA6/CAMK2B/HSPA1A	27
GO:0016236	macroautophagy	40/1705	202/16374	4.76218e-05	0.00253248	0.00223677	CSNK2A1/LARP1/BNIP3L/WIPI2/LAMP2/MAP1LC3B/LAMTOR1/VPS35/ATG12/SQSTM1/TOMM70/PAFAH1B2/MFN2/VDAC1/AKT1/ATP6V1B2/PRKAB2/ULK1/GPSM1/POLDIP2/HMOX1/ATP6V1G1/DYNLL1/RRAGC/VPS28/ATP6V0D1/BNIP3/ATP13A2/TOMM20/CAPN1/LAMTOR4/GABARAPL2/TOMM7/UBXN6/LAMTOR5/ATP6V0B/PINK1/DYNLL2/GABARAPL1/SCOC	40
GO:0051641	cellular localization	9/1705	19/16374	4.92379e-05	0.00257139	0.00227114	DYNC1H1/NUMA1/MLC1/CRYAB/REEP2/APOE/MYO1D/MAP1B/REEP1	9
GO:0007416	synapse assembly	31/1705	142/16374	4.93714e-05	0.00257139	0.00227114	DNER/VPS35/UBE2V2/CRKL/NLGN2/NTRK2/LRRC4B/BSN/SLITRK2/SEMA4D/ADGRL1/DSCAM/ADGRB2/LRRN3/SPOCK2/EFNB2/MAP1B/DVL1/ADD2/NRXN2/CLSTN3/LINGO2/GRIN1/ADGRB1/NRG1/SHANK2/IL1RAPL1/CNTN5/EPHA7/ASIC2/PTPRD	31
GO:0006886	intracellular protein transport	46/1705	245/16374	5.37513e-05	0.00275676	0.00243487	KIF5B/MAPK1/PTPN11/CLTC/YWHAE/TMED10/NPM1/CLTA/SNX27/CTSA/FLNA/TXN/PCNT/SORL1/PARK7/AP1B1/ERP29/NOLC1/DMAP1/ARCN1/RANGAP1/TMEM30A/EMD/OAZ2/TMED2/SLU7/PKIA/ATP13A2/NUCB1/CHP1/B3GAT3/BCAP31/MYRIP/INSIG1/GAS6/TRIM28/AP2M1/AP2S1/YWHAH/CLTB/RIMS1/RAN/RIMS2/TENM1/SCG5/CD81	46
GO:0006810	transport	27/1705	117/16374	5.4022e-05	0.00275676	0.00243487	ACSL3/FNBP1L/TMED10/DYNC1H1/NUMA1/ARF1/SYNJ1/NRP1/MLC1/CANX/POFUT2/P2RX7/YKT6/CRYAB/TMED2/REEP2/BNIP3/SYT1/MAP1B/S100A10/AP2M1/ACTB/NRG1/PINK1/CNP/REEP1/NDRG4	27
GO:0006396	RNA processing	25/1705	105/16374	5.83831e-05	0.00294951	0.00260511	HNRNPH1/SON/HNRNPU/HNRNPH3/HNRNPUL1/CLK1/SNRNP70/DDX17/SYNCRIP/PTBP3/HNRNPLL/HNRNPK/POLR2A/CDK11B/PABPN1/PABPC4/PTBP1/U2AF2/TMBIM6/AHNAK/LARP6/FASTK/RPS26/RPS13/HSPA1A	25
GO:0060322	head development	42/1705	218/16374	6.06509e-05	0.00300803	0.0026568	MAPK1/CHD8/PTPN11/ACSL3/BAIAP2/STXBP3/UFM1/ADGRG1/PLXNB2/DPYSL2/CDK5RAP3/XRCC6/HMGCS1/MACO1/PCDH19/FOXG1/CD9/PPT1/MACROD2/ATP2B1/ROGDI/CIC/BAG6/NES/ATP6V0D1/CNTNAP2/SYT1/SNRPB/UFC1/CSK/GRIN2A/CST3/SYT4/STMN1/ADCY1/GRIN1/DDIT4/ATP6AP2/UNC5C/MBD3/EPHA7/MT3	42
GO:0048813	dendrite morphogenesis	23/1705	93/16374	6.07323e-05	0.00300803	0.0026568	RAPGEF2/CAPRIN1/RAB21/KIDINS220/CDC42/MAP6/SARM1/DLG4/TMEM106B/CDKL5/SEMA4D/RAP2A/STK11/OBSL1/DSCAM/EPHA4/DVL1/YWHAH/PAK3/GRIN1/NSMF/IL1RAPL1/PTPRD	23
GO:0033119	negative regulation of RNA splicing	5/1705	6/16374	6.67424e-05	0.00327362	0.00289138	PTBP3/PTBP1/TMBIM6/RPS26/RPS13	5
GO:1901998	toxin transport	12/1705	33/16374	6.85881e-05	0.0033318	0.00294276	CCT4/CCT2/CCT3/COPZ1/NRP1/DNM1/CCT5/CCT8/TCP1/BNIP3/CCT7/HSPA5	12
GO:0070198	protein localization to chromosome, telomeric region	10/1705	24/16374	7.24732e-05	0.0034598	0.00305582	ATRX/CCT4/CCT2/CCT3/CCT5/CCT8/CCT6A/TCP1/TERF2IP/CCT7	10
GO:0048675	axon extension	23/1705	94/16374	7.25927e-05	0.0034598	0.00305582	PPP3CB/MAPT/PTPRS/RAB21/HSP90AA1/DPYSL2/NRP1/PAK1/MEGF8/CDKL5/PLXNA3/GDI1/APOE/DSCAM/SLC9A6/MAP1B/DVL1/PLXNA4/RTN4/HSP90AB1/SHTN1/OLFM1/MT3	23
GO:0016043	cellular component organization	39/1705	199/16374	7.4522e-05	0.00351855	0.00310771	CAMSAP2/HNRNPU/MIA3/BAIAP2/CSNK1D/TOR1AIP2/DMPK/LNPK/LAMTOR1/CDC42/SPTBN1/SEC61A1/SQSTM1/DNM1/LAPTM4B/SURF4/PARK7/KAT2A/EGLN1/ATL1/CDKL5/SEMA4D/ARL1/P2RX7/SNX10/TMED2/FAT4/SYNGR1/OBSL1/ABHD17A/TMED9/SUN2/OPTN/CIT/HSPA8/IL1RAPL1/EPHA7/REEP1/ANK3	39
GO:0006605	protein targeting	29/1705	132/16374	7.55848e-05	0.00353569	0.00312285	YWHAQ/YWHAE/HSPA4/HSP90AA1/BNIP3L/LAMP2/TCAF1/OS9/SORL1/PAK1/GIPC1/MICALL2/YWHAZ/GDI1/SYNGR1/NUCB1/BAG4/CHP1/STOM/TOMM7/RPL11/YWHAG/YWHAB/PINK1/UBL5/FIS1/PRNP/ATP5IF1/ANK3	29
GO:0006914	autophagy	61/1705	359/16374	8.08885e-05	0.00369637	0.00326476	HERC1/MTDH/LARP1/MAPT/CLTC/FNBP1L/SNRNP70/ULK2/BNIP3L/LAMP2/DDIT3/MAP1LC3B/CTSA/LAMTOR1/VPS51/VPS35/SQSTM1/TMEM59/PAFAH1B2/PARK7/VDAC1/AKT1/ATP6V1B2/PRKAB2/ULK1/EIF4G1/PIP4K2B/GPSM1/TRIM8/POLDIP2/CLU/HMOX1/EIF4G2/TOLLIP/ATP6V1G1/RRAGC/ULK3/RNF41/STK11/CISD2/TMBIM6/ITGB4/ATP6V0D1/BNIP3/ATP13A2/CAPN1/LAMTOR4/NUPR1/GABARAPL2/OPTN/LAMTOR5/ATP6V0B/EEF1A2/PSAP/PINK1/HSPA8/GFAP/HSPB1/GABARAPL1/SCOC/MT3	61
GO:0070200	establishment of protein localization to telomere	8/1705	16/16374	8.11569e-05	0.00369637	0.00326476	CCT4/CCT2/CCT3/CCT5/CCT8/CCT6A/TCP1/CCT7	8
GO:0098916	anterograde trans-synaptic signaling	25/1705	107/16374	8.12147e-05	0.00369637	0.00326476	PTPRS/DNAJC5/PCDH17/DNM1/NLGN2/PRKAR1B/DLG4/PPFIA2/STXBP1/LRP8/GNAI2/PPT1/BRSK1/PRKAR2B/SYT1/PTPRN2/UNC13A/CNR1/DVL1/NRXN2/GNAI1/TUBB2B/HSPA8/RIMS1/CACNA1B	25
GO:0009408	response to heat	27/1705	120/16374	8.58959e-05	0.00387452	0.00342211	MAPK1/RANBP2/DNAJB6/MAPT/YWHAE/PTGES3/HSP90AA1/PSIP1/IGFBP7/MT-CYB/AKT1/FKBP4/DNAJA4/CRYAB/BAG4/DNAJA2/HSBP1/HSPH1/SOD1/HSPA1B/HSP90AB1/IER5/DNAJB1/DNAJA1/HSPA8/CAMK2B/HSPA1A	27
GO:0016079	synaptic vesicle exocytosis	22/1705	89/16374	8.77872e-05	0.00392479	0.00346651	PREPL/DNAJC5/NCS1/BACE1/SYNJ1/ATP2A2/GIPC1/ERC2/STXBP1/P2RX7/SYT1/DVL1/STX3/GIT1/CSPG5/SYT4/ADCY1/CALM3/RIMS1/SV2A/STXBP5L/PRKCB	22
GO:0034330	cell junction organization	17/1705	60/16374	9.00549e-05	0.00399085	0.00352486	RAPGEF2/PTPRS/PCDH17/PTPRF/CNKSR2/DAG1/NRP1/SLITRK2/CDH8/SPARCL1/PTPRO/SPARC/NDRG1/LRFN5/LRFN4/TUBB/PTPRD	17
GO:0044772	mitotic cell cycle phase transition	54/1705	309/16374	9.60848e-05	0.00422104	0.00372818	AKAP9/DDB1/CSNK1D/YWHAE/ANAPC5/PSMC6/DDX3X/DYNC1H1/HSP90AA1/DYNC1I2/CCND2/ZFP36L1/APP/SMARCD3/PSMB1/PCNT/RBX1/SEPT7/CCP110/AKT1/ZFP36L2/PLRG1/FHL1/PSMD3/PSMD7/EIF4G1/RAD21/PSMB4/PSMD8/PPP2R1A/PSMD2/PSMB5/ACTR1A/SKP1/DYNLL1/CTDSP1/PSMA7/PSMA4/HECW2/PRKAR2B/PKIA/CTC1/PHB2/PSMB3/ID2/CSNK1E/ANAPC11/FZR1/YWHAG/DCTN3/FAM107A/TUBB/TUBB4B/DHFR	54
GO:0007417	central nervous system development	58/1705	339/16374	9.87752e-05	0.00430183	0.00379953	CHD8/PTPN11/PTPRS/ACSL3/BAIAP2/STXBP3/ATN1/UFM1/ADGRG1/PLXNB2/DNER/DPYSL2/CDK5RAP3/ADAM22/XRCC6/HMGCS1/AKT1/MACO1/PCDH19/TIMP2/NTRK2/COX7B/FOXG1/CD9/PPT1/POU3F3/MACROD2/ATP2B1/ROGDI/CIC/BAG6/NES/ATP6V0D1/GSTP1/BNIP3/CNTNAP2/SYT1/SNRPB/UFC1/SOX4/CSK/S100B/GRIN2A/ID3/CST3/SYT4/STMN1/ADCY1/GRIN1/DDIT4/SOX11/NRG1/UNC5C/MBD3/CNP/EPHA7/ASIC2/MT3	58
GO:0010001	glial cell differentiation	27/1705	121/16374	9.97747e-05	0.00430822	0.00380517	IL6ST/DNER/WDR1/DAG1/HDAC2/NFE2L1/ID4/TMEM98/CD9/GSN/DAAM2/PRPF19/GSTP1/DAB1/SOX9/EPHA4/SOX4/RELA/VIM/ID2/PICK1/SOX11/GPR37L1/NRG1/METRN/PLP1/MT3	27
GO:0006405	RNA export from nucleus	15/1705	50/16374	0.00011354	0.00478002	0.00422188	SRSF11/KHDRBS1/SRRM1/AKAP8L/RNPS1/SRSF2/SRSF3/THOC7/HNRNPA1/RBM8A/NCBP2/DDX39A/U2AF2/SRSF9/SLU7	15
GO:0031397	negative regulation of protein ubiquitination	15/1705	50/16374	0.00011354	0.00478002	0.00422188	PARK7/IVNS1ABP/AKT1/VPS28/U2AF2/CAMLG/CHP1/UBXN1/SOX4/RPS3/HSPA1B/DNAJA1/ISG15/ADGRB1/HSPA1A	15
GO:0043525	positive regulation of neuron apoptotic process	15/1705	50/16374	0.00011354	0.00478002	0.00422188	DDIT3/BACE1/JUN/RHOA/ATF4/UBE2M/BAX/CDC34/NUPR1/PIN1/PAK3/GRN/FIS1/EPHA7/PRNP	15
GO:1905166	negative regulation of lysosomal protein catabolic process	4/1705	4/16374	0.000117195	0.00489312	0.00432178	VPS35/LAPTM4B/ATP13A2/MGAT3	4
GO:0035418	protein localization to synapse	9/1705	21/16374	0.0001291	0.00530255	0.0046834	MAPT/BAIAP2/NPTN/NLGN2/DLG4/BSN/ABHD17B/CLSTN3/ASIC2	9
GO:0036010	protein localization to endosome	9/1705	21/16374	0.0001291	0.00530255	0.0046834	EZR/VPS35/SORL1/TMEM30A/TOLLIP/ABHD17B/ABHD17A/RAB35/MGAT3	9
GO:0048699	generation of neurons	43/1705	233/16374	0.000138952	0.00566116	0.00500014	TOP2B/MAPT/RAPGEF2/YWHAE/FZD3/CRK/CHL1/PLXNB2/DNER/NRP1/MTPN/CRKL/RHOA/HIPK1/PPP1CC/ID4/NTRK2/ATF4/BRSK2/CDKL5/ACAP3/VXN/HDAC5/ATP2B2/BRSK1/NR2F2/RAC1/IER2/FGF13/GJA1/BAX/CEBPB/MAP1B/PIN1/GAS6/CIT/FAM19A1/TUBB2B/DDIT4/HSPA5/SOX11/IL1RAPL1/PTPRD	43
GO:0006996	organelle organization	54/1705	315/16374	0.000160437	0.00648424	0.00572711	MAPK1/CAMSAP2/HNRNPU/AKAP9/MAPT/MUM1/NUCKS1/MYCBP2/BNIP3L/EZR/KIF3A/DMPK/VPS35/SQSTM1/ZBTB7A/NFE2L1/TOMM70/HMGN3/SURF4/ATP2A2/MFN2/ATP6V1B2/PLXNA3/KIF5C/PHF1/ATP6V1G1/P2RX7/HDAC5/PFDN2/SYT11/BAG6/ATP6V0D1/BNIP3/ATP13A2/TOMM20/TFAM/RELA/TMED9/KIAA1324/TOMM7/SUN2/BRD3/CBX6/CENPV/TRIM28/IQCJ-SCHIP1/ATP6V0B/GPX4/SLC25A6/PINK1/FIS1/ATP5F1D/TIMM13/STMN3	54
GO:1902600	proton transmembrane transport	23/1705	99/16374	0.000168654	0.00676224	0.00597265	SLC4A10/ATP2A2/MT-CO3/ATP6V1B2/COX7A2L/MT-CO2/COX7B/ATP6V1G1/COX6C/CLCN4/ATP6V0D1/SLC9A6/NDUFA4/COX7A2/COX5A/ATP6V0B/ATP5F1B/COX6B1/SLC25A3/COX4I1/ATP6AP1/ATP5MF/COX7C	23
GO:0000381	regulation of alternative mRNA splicing, via spliceosome	13/1705	41/16374	0.00017319	0.00688943	0.00608499	KHDRBS1/HNRNPU/RNPS1/DDX17/DDX5/RBM10/ZBTB7A/HNRNPA1/RBM8A/PTBP1/RBM15/SAP18/CELF5	13
GO:0016601	Rac protein signal transduction	11/1705	31/16374	0.000177333	0.00699687	0.00617988	ABI2/HACD3/CRK/NISCH/KRAS/SSX2IP/WASF1/CADM4/ELMO1/BRK1/STMN3	11
GO:1901564	organonitrogen compound metabolic process	18/1705	69/16374	0.000181189	0.00699687	0.00617988	PSMC6/AZIN1/APP/ODC1/PSMB1/MTPN/PSMD3/PSMD7/PSMB4/PSMD8/PSMD2/PSMB5/OAZ2/PSMA7/PSMA4/APOE/PSMB3/HSP90AB1	18
GO:0071243	cellular response to arsenic-containing substance	6/1705	10/16374	0.000183167	0.00699687	0.00617988	DDX3X/MKNK2/CPEB2/UROS/HMOX1/ATF3	6
GO:0080171	lytic vacuole organization	6/1705	10/16374	0.000183167	0.00699687	0.00617988	TMEM165/SCARB2/ARF1/LAPTM4B/TMEM175/GRN	6
GO:0090084	negative regulation of inclusion body assembly	6/1705	10/16374	0.000183167	0.00699687	0.00617988	DNAJB6/DNAJA4/HSPA1B/DNAJB1/DNAJB2/HSPA1A	6
GO:0031109	microtubule polymerization or depolymerization	19/1705	75/16374	0.000184201	0.00699687	0.00617988	CAMSAP2/AKAP9/HDGFL3/MAPT/CSNK1D/NUMA1/TUBGCP2/STMN2/PAK1/FKBP4/CRYAB/RAC1/TUBGCP6/FGF13/EML2/RPS3/MAP1B/STMN1/CLIP3	19
GO:0099643	signal release from synapse	24/1705	106/16374	0.00018758	0.00703991	0.0062179	PREPL/DNAJC5/NCS1/BACE1/SYNJ1/GIPC1/ERC2/STXBP1/P2RX7/SYT11/SYT1/KCNMB4/UNC13A/DVL1/STX3/GIT1/CSPG5/SYT4/ADCY1/CALM3/RIMS1/SV2A/STXBP5L/PRKCB	24
GO:0006364	rRNA processing	28/1705	132/16374	0.000188121	0.00703991	0.0062179	DDX21/DDX17/SNU13/DDX56/WBP11/NOLC1/RPL5/UTP14C/RPL14/TRMT112/RPS6/EXOSC6/NOP56/PA2G4/RPL11/RPS17/RPS7/RPL7/RPL27/RPS14/RPS16/RPL35A/RPS24/RPS9/RPS27/SBDS/RPS2/RPL26	28
GO:0008344	adult locomotory behavior	14/1705	47/16374	0.000207344	0.00770222	0.00680288	CHL1/INPP5F/ADAM22/ATP1A2/APP/PARK7/ARCN1/PPT1/CSTB/SEZ6/ID2/GRIN1/CNP/FGF12	14
GO:0034975	protein folding in endoplasmic reticulum	5/1705	7/16374	0.000213435	0.00775737	0.00685158	PDIA3/CANX/HSPA5/CALR/HSP90B1	5
GO:0044829	positive regulation by host of viral genome replication	5/1705	7/16374	0.000213435	0.00775737	0.00685158	VAPA/NUCKS1/PPIB/STOM/HSPA8	5
GO:0070972	protein localization to endoplasmic reticulum	5/1705	7/16374	0.000213435	0.00775737	0.00685158	VAPA/DDRGK1/RTN4/PPP1R15A/HSPA5	5
GO:0007052	mitotic spindle organization	19/1705	76/16374	0.000221961	0.00800964	0.00707439	KIF2A/HNRNPU/CLTC/DYNC1H1/NUMA1/KIF3B/SMC3/MAP9/PCNT/CHMP5/CHMP1A/HSPA1B/SUN2/STMN1/GNAI1/RAN/SBDS/CCSAP/HSPA1A	19
GO:0019081	viral translation	7/1705	14/16374	0.000232201	0.0083197	0.00734826	EIF3A/EIF3L/EIF3F/SSB/PTBP1/MCTS1/EIF3G	7
GO:0043524	negative regulation of neuron apoptotic process	28/1705	134/16374	0.000245312	0.00872757	0.0077085	DNAJC5/CHL1/PRKCI/UBE2V2/NRP1/SYNGAP1/PARK7/OXR1/JUN/RHOA/KRAS/NTRK2/STXBP1/LGMN/HMOX1/PPT1/NES/BAX/CEBPB/SOD1/SET/PIN1/HSP90AB1/GRN/GRIN1/PINK1/GABRB3/MT3	28
GO:0032436	positive regulation of proteasomal ubiquitin-dependent protein catabolic process	16/1705	59/16374	0.000251674	0.00889129	0.00785311	CSNK1D/UBE2V2/DDRGK1/RBX1/RACK1/AKT1/TRIB2/CLU/NOP53/STUB1/KEAP1/DVL1/CSNK1E/USP5/DNAJB2/HSPA1A	16
GO:0006695	cholesterol biosynthetic process	17/1705	65/16374	0.000262504	0.0091553	0.00808628	KPNB1/CNBP/HMGCS1/ERLIN2/MSMO1/SQLE/IDI1/HMGCR/MVD/CYB5R3/APOE/SC5D/FASN/SOD1/INSIG1/SCD/RAN	17
GO:0022613	ribonucleoprotein complex biogenesis	30/1705	148/16374	0.000262771	0.0091553	0.00808628	DDX21/DDX17/NPM1/SNU13/DDX56/WBP11/NOLC1/RPL5/UTP14C/RPL14/GTF3A/NOP53/RPS6/EXOSC6/NOP56/PA2G4/RPL11/RPS17/RPS7/RPL7/RPL27/RPS14/RPS16/RPL35A/RPS24/RPS9/RPS27/SBDS/RPS2/RPL26	30
GO:1902653	secondary alcohol biosynthetic process	13/1705	43/16374	0.000294846	0.0101335	0.00895023	KPNB1/HMGCS1/ERLIN2/SQLE/IDI1/HMGCR/MVD/APOE/SC5D/FASN/SOD1/SCD/RAN	13
GO:0086064	cell communication by electrical coupling involved in cardiac conduction	9/1705	23/16374	0.000295915	0.0101335	0.00895023	ATP1A2/PDE4D/SLC8A1/ATP1B1/ATP1B2/GJA1/ATP1A1/CALM3/CALM1	9
GO:0034504	protein localization to nucleus	30/1705	149/16374	0.000296863	0.0101335	0.00895023	MAPK1/HNRNPU/DNAJB6/LMNA/YWHAE/CDK5RAP3/FLNA/ZBTB7A/PARK7/GLUL/AKT1/PLRG1/NOLC1/TMEM98/TRIM8/DMAP1/SKP1/TOPORS/CHCHD10/STK11/PKIA/PARP1/CHP1/SOX9/DVL1/PIN1/RPL11/TRIM28/CALR/RAN	30
GO:0034613	cellular protein localization	42/1705	234/16374	0.000307193	0.0104157	0.00919952	MAPT/CLTC/TMED10/NPM1/HSP90AA1/CLTA/SNX27/CTSA/LAMTOR1/NPTN/VPS35/HEPACAM/AP1B1/AKT1/ERP29/ID4/ARCN1/RRAGC/TMED2/SLU7/RAP2A/PRPF19/CD63/PARP1/ARMCX3/RIT2/DVL1/BCAP31/CSNK1E/MYRIP/STX3/HSP90AB1/RAB11B/AP2M1/AP2S1/YWHAH/CLTB/MAP1A/RIMS1/RIMS2/SCG5/REEP1	42
GO:0010977	negative regulation of neuron projection development	16/1705	60/16374	0.000310444	0.0104558	0.00923489	PTPRS/DPYSL3/CRMP1/HDAC2/STMN2/FKBP4/NR2F1/APOE/EPHA4/RIT2/VIM/PTPRO/EFNB2/B2M/LGALS1/MT3	16
GO:0007004	telomere maintenance via telomerase	17/1705	66/16374	0.000319742	0.0106976	0.0094485	MAPK1/HNRNPU/PTGES3/CCT4/HSP90AA1/CCT2/CCT3/CCT5/CCT8/CCT6A/TCP1/HNRNPA1/TERF2IP/CTC1/CCT7/NOP10/HSP90AB1	17
GO:0030970	retrograde protein transport, ER to cytosol	10/1705	28/16374	0.000328415	0.0109155	0.00964092	SEL1L/SEC61B/SELENOS/OS9/DERL1/BRSK2/HERPUD1/AUP1/BCAP31/HSP90B1	10
GO:0009057	macromolecule catabolic process	24/1705	110/16374	0.000338969	0.0111199	0.00982153	CSNK2A1/DDB1/MYCBP2/SNX3/LPCAT1/AZIN1/FLNA/ODC1/SORL1/PSMD3/PSMD2/VPS28/HMGCR/OAZ2/RNF41/GJA1/SOX9/RELA/GRIN2A/FZR1/PIN1/ADGRB1/PHB/NRG1	24
GO:1901565	organonitrogen compound catabolic process	24/1705	110/16374	0.000338969	0.0111199	0.00982153	CSNK2A1/DDB1/MYCBP2/SNX3/LPCAT1/AZIN1/FLNA/ODC1/SORL1/PSMD3/PSMD2/VPS28/HMGCR/OAZ2/RNF41/GJA1/SOX9/RELA/GRIN2A/FZR1/PIN1/ADGRB1/PHB/NRG1	24
GO:0070727	cellular macromolecule localization	32/1705	164/16374	0.000343778	0.0112049	0.00989659	MAPT/CLTC/TMED10/NPM1/HSP90AA1/CLTA/SNX27/ZFP36L1/CTSA/NPTN/VPS35/AP1B1/ERP29/ARCN1/TMED2/SLU7/PARP1/RIT2/DVL1/BCAP31/CSNK1E/MYRIP/HSP90AB1/AP2M1/AP2S1/YWHAH/CLTB/MAP1A/RIMS1/RIMS2/SCG5/REEP1	32
GO:0048025	negative regulation of mRNA splicing, via spliceosome	8/1705	19/16374	0.000357872	0.0115896	0.0102363	HNRNPA2B1/RNPS1/HNRNPK/RBM10/PTBP1/U2AF2/SRSF9/SAP18	8
GO:0016049	cell growth	45/1705	258/16374	0.00036913	0.011878	0.0104911	CSNK2A1/DDX3X/LAMTOR1/CDC42/EXTL3/ENO1/CLSTN1/DDR1/CDK11B/IGFBP7/SDCBP/MTPN/RACK1/CRKL/BTG1/AKT1/RHOA/FHL1/EIF4G1/HDGFL2/EIF4G2/PPP2R1A/PPT1/SLIT2/CRYAB/H3F3B/STK11/EPB41L3/ADAM15/ADIPOR1/GJA1/NDUFS3/APBB1/HSPA1B/RTN4/EI24/PAK5/FAM107A/CLSTN3/DNAJB2/TSPYL2/PHB/SGK1/HSPA1A/MT3	45
GO:0010389	regulation of G2/M transition of mitotic cell cycle	19/1705	79/16374	0.000378722	0.0121095	0.0106956	AKAP9/CSNK1D/YWHAE/DYNC1H1/HSP90AA1/DYNC1I2/PCNT/CCP110/PPP2R1A/ACTR1A/DYNLL1/PRKAR2B/PKIA/CTC1/CSNK1E/YWHAG/DCTN3/TUBB/TUBB4B	19
GO:0050773	regulation of dendrite development	7/1705	15/16374	0.000396301	0.0125919	0.0111216	CAMSAP2/CRK/CRKL/RHOA/CDKL5/SEZ6/CSMD3	7
GO:0006464	cellular protein modification process	59/1705	365/16374	0.00040962	0.0129337	0.0114235	CSNK1D/CCDC88A/UBE2N/HSP90AA1/RPN2/CCND2/PLXNB2/NPTN/CDK5RAP3/APP/SQSTM1/PPP1R15B/ACVR2A/RACK1/PARK7/CRKL/DLC1/PAK1/AKT1/ERP29/KRAS/NTRK2/PTPA/PTBP1/SEMA4D/SIRPA/SLIT2/CTDSP1/TERF2IP/RPN1/RAC1/EDNRB/RAP2A/NOP53/TADA3/UBE2M/CHP1/SOX9/CADM4/ST8SIA4/CDC34/DVL1/NUPR1/PIN1/GAS6/CPE/YWHAB/PPP1R15A/CALM3/NSMF/PINK1/CALM1/CLIP3/FKBP8/CHRM3/HSPB1/EPHA7/PRNP/MT3	59
GO:0070925	organelle assembly	52/1705	312/16374	0.000423223	0.0132803	0.0117296	AKAP9/CSNK1D/YWHAE/KIFAP3/TPM1/CCDC88A/DYNC1H1/HSP90AA1/DYNC1I2/WIPI2/PACS2/ODF2L/EZR/KIF3A/NUMA1/G3BP2/CNOT6L/KIF3B/PCNT/SDCBP/MFN2/CCP110/IFT57/RHOA/TMEM175/ULK1/PIP4K2B/PRKAR1A/FEZ1/CDKL5/DYNLRB1/SSX2IP/RPL5/PPP2R1A/ACTR1A/DYNLL1/EVI5L/GSN/NOP53/PRKAR2B/KIF3C/NUPR1/CSNK1E/KIAA1324/RPL11/YWHAG/DCTN3/RPS14/PINK1/DYNLL2/TUBB/TUBB4B	52
GO:0021543	pallium development	24/1705	112/16374	0.000448849	0.013947	0.0123185	KIF5B/UBA6/PTPRS/YWHAE/CRK/FLNA/CRKL/SLC38A2/ID4/FEZ1/NTRK2/PLXNA3/LRP8/FAT4/BCAN/BNIP3/DAB1/CNTNAP2/FGF13/BAX/EPHA5/GRIN1/UQCRQ/RAN	24
GO:0010972	negative regulation of G2/M transition of mitotic cell cycle	15/1705	56/16374	0.000449991	0.013947	0.0123185	PSMC6/PSMB1/RBX1/FHL1/PSMD3/PSMD7/RAD21/PSMB4/PSMD8/PSMD2/PSMB5/SKP1/PSMA7/PSMA4/PSMB3	15
GO:0006119	oxidative phosphorylation	10/1705	29/16374	0.000454852	0.0140116	0.0123756	RHOA/CHCHD10/PDE12/UQCRC1/SLC25A23/UQCRH/NUPR1/PINK1/ATP5F1D/UQCRB	10
GO:0002479	antigen processing and presentation of exogenous peptide antigen via MHC class I, TAP-dependent	18/1705	74/16374	0.000461466	0.0141293	0.0124795	PSMC6/PSMB1/PDIA3/TAPBP/HLA-E/PSMD3/PSMD7/PSMB4/PSMD8/PSMD2/PSMB5/PSMA7/PSMA4/HLA-A/VAMP3/PSMB3/B2M/CALR	18
GO:0051603	proteolysis involved in cellular protein catabolic process	17/1705	68/16374	0.00046725	0.0142202	0.0125598	USP14/PSMC6/TMF1/NFE2L1/DDRGK1/CLPX/CTSL/LGMN/APOE/EPHA4/NUPR1/GABARAPL2/HSP90AB1/PINK1/CTSB/UBB/ATP5IF1	17
GO:0034329	cell junction assembly	23/1705	106/16374	0.000485047	0.0146734	0.0129601	RAPGEF2/CDC42/UBE2V2/FLNA/NLGN2/RHOA/NTRK2/LRRC4B/SLITRK2/ADGRL1/ADGRB2/LRRN3/EFNB2/DVL1/LINGO2/GRIN1/ADGRB1/ACTB/IL1RAPL1/CNTN5/EPHA7/ASIC2/PTPRD	23
GO:0036294	cellular response to decreased oxygen levels	20/1705	87/16374	0.000506434	0.0152292	0.013451	PSMC6/PSMB1/RBX1/EGLN1/ELOC/PSMD3/PSMD7/PSMB4/PSMD8/PSMD2/PSMB5/PSMA7/PSMA4/BNIP3/PSMB3/CHCHD2/PICK1/UBC/ELOB/UBB	20
GO:0099641	anterograde axonal protein transport	5/1705	8/16374	0.000520166	0.0155015	0.0136915	KIF5B/KIF5C/MAP1A/HSPB1/KIF5A	5
GO:0070498	interleukin-1-mediated signaling pathway	22/1705	100/16374	0.000521626	0.0155015	0.0136915	PSMC6/UBE2N/SQSTM1/PSMB1/RBX1/PSMD3/PSMD7/ZNF675/PSMB4/PSMD8/TOLLIP/PSMD2/PSMB5/SKP1/PSMA7/PSMA4/NFKBIA/PSMB3/RELA/IRAK1/UBC/UBB	22
GO:0006521	regulation of cellular amino acid metabolic process	14/1705	51/16374	0.000526975	0.01551	0.013699	PSMC6/AZIN1/ODC1/PSMB1/PSMD3/PSMD7/PSMB4/PSMD8/PSMD2/PSMB5/OAZ2/PSMA7/PSMA4/PSMB3	14
GO:0006470	protein dephosphorylation	30/1705	154/16374	0.000533201	0.01551	0.013699	PPP3CB/PPP2CB/PTPRS/YWHAE/PPM1K/DLC1/PPM1G/PPP1CC/PTPA/PTBP1/PPM1H/PPP2R1A/MTMR6/CTDSP1/SBF1/STK11/PTPRN2/PPP4C/PTPRT/PTPRO/PIN1/YWHAB/PPP1R15A/CALM3/NSMF/PHPT1/PINK1/CALM1/CYCS/PTPRD	30
GO:0006595	polyamine metabolic process	4/1705	5/16374	0.000537263	0.01551	0.013699	AMD1/ODC1/SRM/OAZ2	4
GO:1904714	regulation of chaperone-mediated autophagy	4/1705	5/16374	0.000537263	0.01551	0.013699	CTSA/ATP13A2/EEF1A2/GFAP	4
GO:1990049	retrograde neuronal dense core vesicle transport	4/1705	5/16374	0.000537263	0.01551	0.013699	KIF5B/KIF1C/KIF1A/KIF5A	4
GO:0071526	semaphorin-plexin signaling pathway	8/1705	20/16374	0.000542279	0.0155659	0.0137483	PLXNB2/FLNA/NRP1/PLXNA3/SEMA4D/RAC1/PLXNA4/ARHGDIA	8
GO:0030433	ubiquitin-dependent ERAD pathway	15/1705	57/16374	0.000552719	0.0157759	0.0139339	USP14/STT3B/SEL1L/SEC61B/SELENOS/ERLIN2/OS9/SGTA/DERL1/HERPUD1/BAG6/STUB1/BCAP31/HSPA5/HSP90B1	15
GO:0007399	nervous system development	74/1705	488/16374	0.000582622	0.0164852	0.0145603	KIF2A/ATN1/CRMP1/ZFP36L1/DNER/DPYSL2/VPS35/ADAM22/MEF2D/NRP1/RFNG/ITPK1/FGFR2/SLC7A5/TTLL7/CRKL/NLGN2/GMFB/DLG4/TMOD2/NUMBL/GPSM1/PURA/TIMP2/FEZ1/PALM/BSN/VXN/COX7B/DPYSL5/KIF1BP/PPT1/POU3F3/TBCB/ELAVL3/FAT4/EDNRB/ROGDI/NES/GLRB/BCAN/GSTP1/KCNQ2/DSCAM/FGF13/SEZ6/SPOCK2/ST8SIA4/MAP1B/DVL1/S100B/ADD2/GRIN2A/PLPPR1/NRXN2/BZW2/CSPG5/ID3/CLSTN3/IRF2BPL/ADGRB1/NRG1/CNTN3/ITM2B/SHANK2/CHRM3/SEMA3C/TENM1…	74
GO:0001764	neuron migration	28/1705	141/16374	0.000585537	0.0164852	0.0145603	TOP2B/RAPGEF2/YWHAE/FZD3/CRK/CHL1/ADGRG1/PLXNB2/DNER/FLNA/NRP1/CRKL/NTRK2/CDKL5/ACAP3/NR2F2/RAC1/FGF13/GJA1/BAX/MAP1B/GAS6/TUBB2B/DDIT4/NSMF/NRG1/CAMK2B/SHTN1	28
GO:0008219	cell death	44/1705	256/16374	0.000587752	0.0164852	0.0145603	VAPA/MAPT/TMEM259/BNIP3L/VPS35/SARM1/SORL1/PARK7/AKT1/EGLN1/CACYBP/PPP1R13B/EIF4G1/MT-CO2/AIMP2/LRPAP1/REL/FOSL2/CLU/HMOX1/EIF4G2/CSF1/CRYAB/ARL6IP5/PDE12/APOE/BNIP3/ATP13A2/PARP1/BRINP1/CHP1/SOX4/EFNB2/HSPA1B/OPTN/CST3/DDIT4/SOX11/PHB/PINK1/UBB/HSPA1A/PRNP/MT3	44
GO:0042177	negative regulation of protein catabolic process	11/1705	35/16374	0.000590623	0.0164852	0.0145603	MYCBP2/SNX3/AZIN1/FLNA/HMGCR/RELA/GRIN2A/PIN1/ADGRB1/PHB/NRG1	11
GO:1990138	neuron projection extension	22/1705	101/16374	0.000602483	0.0167239	0.0147711	MAPT/PTPRS/RAB21/ALCAM/DPYSL2/DDR1/CPNE1/PAK1/CDKL5/PLXNA3/GDI1/APOE/SYT1/UNC13A/MAP1B/RTN4/SYT4/RIMS1/RIMS2/SHTN1/OLFM1/MT3	22
GO:0016126	sterol biosynthetic process	13/1705	46/16374	0.00060962	0.0168295	0.0148644	KPNB1/HMGCS1/ERLIN2/SQLE/IDI1/HMGCR/MVD/APOE/SC5D/FASN/SOD1/SCD/RAN	13
GO:0021761	limbic system development	19/1705	82/16374	0.000623875	0.0171294	0.0151293	KIF5B/UBA6/PTPRS/YWHAE/CRK/FGFR2/CRKL/ID4/FEZ1/PLXNA3/BCAN/DAB1/CNTNAP2/FGF13/BAX/EPHA5/ARPC5/UQCRQ/RAN	19
GO:0006511	ubiquitin-dependent protein catabolic process	53/1705	325/16374	0.000636608	0.0173846	0.0153547	CSNK2A1/USP14/UBA6/UBE2B/USP22/DDB1/RBBP6/CSNK1D/ANAPC5/PSMC6/TTC3/FBXO21/USP7/UBE2V2/SQSTM1/DDRGK1/SDCBP/OS9/RBX1/RACK1/USP11/PARK7/AKT1/GIPC1/SGTA/TRIB2/CLU/RPL5/HERPUD1/TOPORS/USP1/NOP53/RNF11/BAG6/RPL23/STUB1/CAMLG/RNF139/UBXN1/KEAP1/DVL1/CSNK1E/ANAPC11/USP5/FZR1/RPL11/HSP90AB1/RPS7/DNAJB2/DDA1/PINK1/MAP1A/HSPA1A	53
GO:0031396	regulation of protein ubiquitination	7/1705	16/16374	0.000641413	0.0174216	0.0153874	HSP90AA1/HERPUD1/HSPA1B/HSP90AB1/DNAJB2/PINK1/HSPA1A	7
GO:0043954	cellular component maintenance	6/1705	12/16374	0.00067011	0.0181037	0.0159899	VPS35/ABHD17B/APOE/HOMER1/ZNF804A/PRNP	6
GO:0070059	intrinsic apoptotic signaling pathway in response to endoplasmic reticulum stress	15/1705	58/16374	0.00067479	0.0181332	0.0160159	DDIT3/SELENOS/PARK7/ERP29/ATF4/BRSK2/HERPUD1/SERINC3/BAG6/TMBIM6/BAX/CEBPB/PPP1R15A/HSPA1A/SELENOK	15
GO:1900034	regulation of cellular response to heat	18/1705	77/16374	0.000767741	0.0204025	0.0180202	MAPK1/RANBP2/DNAJB6/MAPT/YWHAE/PTGES3/HSP90AA1/FKBP4/CRYAB/BAG4/HSBP1/HSPH1/HSPA1B/HSP90AB1/DNAJB1/HSPA8/CAMK2B/HSPA1A	18
GO:0099172	presynapse organization	11/1705	36/16374	0.000771352	0.0204025	0.0180202	PCDH17/VPS35/APP/NLGN2/EIF4G1/SLITRK2/CLSTN3/LRFN5/IL1RAPL1/LRFN4/PTPRD	11
GO:1900026	positive regulation of substrate adhesion-dependent cell spreading	11/1705	36/16374	0.000771352	0.0204025	0.0180202	ARPC2/CRK/CDC42/FLNA/NRP1/CRKL/RAC1/S100A10/CSPG5/DOCK5/CALR	11
GO:0050772	positive regulation of axonogenesis	8/1705	21/16374	0.000796543	0.020856	0.0184208	STK25/SKIL/RHOA/NTRK2/SLIT2/STK11/METRN/ARHGDIA	8
GO:0061418	regulation of transcription from RNA polymerase II promoter in response to hypoxia	17/1705	71/16374	0.000796757	0.020856	0.0184208	PSMC6/PSMB1/RBX1/EGLN1/ELOC/PSMD3/PSMD7/PSMB4/PSMD8/PSMD2/PSMB5/PSMA7/PSMA4/PSMB3/UBC/ELOB/UBB	17
GO:0045727	positive regulation of translation	16/1705	65/16374	0.0008152	0.0212288	0.01875	MAPK1/LARP1/PABPC1/DDX3X/NPM1/CIRBP/CPEB3/RHOA/PAIP1/RPL5/SOX4/VIM/LARP6/PINK1/RPS4X/RPL26	16
GO:0016358	dendrite development	22/1705	104/16374	0.000913707	0.023672	0.020908	UBA6/CAMSAP2/BAIAP2/KIDINS220/CRK/ACSL4/MAP6/HDAC2/APP/SYNGAP1/CRKL/RHOA/TMEM106B/CDKL5/LRP8/DSCAM/DAB1/SLC9A6/SEZ6/DVL1/PAK3/CSMD3	22
GO:0050790	regulation of catalytic activity	13/1705	48/16374	0.000948572	0.0244499	0.021595	RING1/PRKAB2/PSMD3/RALGDS/PSMD2/SIRPA/AUP1/PARP1/HSPH1/CAPN1/SGK1/RIMS1/CTSB	13
GO:0034220	ion transmembrane transport	46/1705	277/16374	0.000953438	0.0244506	0.0215956	AKAP9/YWHAQ/YWHAE/CLCN7/ATP1A2/TTYH3/ANO8/ATP2A2/ATP6V1B2/ANXA6/TMEM63B/SCN1A/TTYH1/ATP6V1G1/SCN3A/P2RX7/ATP2B2/ATP2B1/ATP1B1/NALCN/ATP1B2/UNC79/ATP8A1/GRIA3/CLCN4/S100A6/ATP6V0D1/KCNQ2/ATP13A2/GJA1/LASP1/KCNJ6/ATP1A1/SCN9A/ATP6V0B/SLC24A2/KCNQ5/SGK1/CACNA1E/HCN1/ATP6AP1/ASIC2/CACNA1B/CACNA2D3/KCNB2/ANO4	46
GO:0000380	alternative mRNA splicing, via spliceosome	14/1705	54/16374	0.000982351	0.0250249	0.0221029	KHDRBS1/HNRNPU/RNPS1/DDX17/DDX5/RBM10/ZBTB7A/HNRNPA1/RBM8A/PTBP1/SLU7/RBM15/SAP18/CELF5	14
GO:0017148	negative regulation of translation	15/1705	60/16374	0.000988564	0.0250249	0.0221029	ILF3/LARP1/CAPRIN1/DDX3X/SYNCRIP/CIRBP/CPEB3/RACK1/PURA/NCL/RNF139/RPS3/TOB1/CALR/DHFR	15
GO:0042769	DNA damage response, detection of DNA damage	11/1705	37/16374	0.000995647	0.0250249	0.0221029	UBE2B/DDB1/RBX1/POLD2/USP1/PARP1/SOX4/RPS3/MRPS26/UBC/UBB	11
GO:0051932	synaptic transmission, GABAergic	11/1705	37/16374	0.000995647	0.0250249	0.0221029	KIF5B/NISCH/SLC6A1/NLGN2/KRAS/STXBP1/PLCL1/CNR1/SYN3/CLSTN3/CA2	11
GO:0022008	neurogenesis	50/1705	309/16374	0.00106301	0.0265859	0.0234816	NAP1L1/TOP2B/RAPGEF2/YWHAE/FZD3/CRK/CHL1/PLXNB2/DNER/NRP1/MTPN/SORL1/CRKL/HIPK1/PPP1CC/NUMBL/ID4/NTRK2/ATF4/BRSK2/CDKL5/ACAP3/VXN/HDAC5/ATP2B2/BRSK1/NR2F2/FAT4/RAC1/ROGDI/IER2/FGF13/GJA1/BRINP1/BAX/EPHA4/SOX4/CEBPB/MAP1B/GRIN2A/PIN1/GAS6/FAM19A1/TUBB2B/DDIT4/HSPA5/SOX11/METRN/IL1RAPL1/PTPRD	50
GO:0050435	amyloid-beta metabolic process	10/1705	32/16374	0.0010953	0.0268738	0.0237359	TMED10/BACE1/APP/SORL1/CLU/APOE/UNC13A/EPHA4/MGAT3/PRNP	10
GO:0035542	regulation of SNARE complex assembly	3/1705	3/16374	0.00112726	0.0268738	0.0237359	STXBP6/SEPT8/STXBP1	3
GO:0061740	protein targeting to lysosome involved in chaperone-mediated autophagy	3/1705	3/16374	0.00112726	0.0268738	0.0237359	LAMP2/CLU/HSPA8	3
GO:1902988	neurofibrillary tangle assembly	3/1705	3/16374	0.00112726	0.0268738	0.0237359	MAPT/SORL1/CLU	3
GO:1903575	cornified envelope assembly	3/1705	3/16374	0.00112726	0.0268738	0.0237359	UGCG/STX2/PSAP	3
GO:1990442	intrinsic apoptotic signaling pathway in response to nitrosative stress	3/1705	3/16374	0.00112726	0.0268738	0.0237359	DDIT3/PARK7/DNAJA1	3
GO:2000807	regulation of synaptic vesicle clustering	3/1705	3/16374	0.00112726	0.0268738	0.0237359	PCDH17/BRSK2/BRSK1	3
GO:0010038	response to metal ion	6/1705	13/16374	0.00113514	0.0268738	0.0237359	PARK7/MT2A/CUTA/NDRG1/MT1X/MT3	6
GO:0097479	synaptic vesicle localization	6/1705	13/16374	0.00113514	0.0268738	0.0237359	PCDH17/ARF1/NLGN2/BRSK2/BRSK1/PINK1	6
GO:0042254	ribosome biogenesis	30/1705	161/16374	0.00113566	0.0268738	0.0237359	DDX21/DDX17/NPM1/SNU13/GLUL/DDX56/WBP11/NOLC1/RPL5/UTP14C/RPL14/GTF3A/RPS6/EXOSC6/NOP56/PA2G4/RPL11/RPS17/RPS7/RPL7/RPL27/RPS14/RPS16/RPL35A/RPS24/RPS9/RPS27/SBDS/RPS2/RPL26	30
GO:0010975	regulation of neuron projection development	8/1705	22/16374	0.00113836	0.0268738	0.0237359	CCDC88A/NCS1/AKT1/BRSK2/ACAP3/BRSK1/ZNF804A/IL1RAPL1	8
GO:0042273	ribosomal large subunit biogenesis	8/1705	22/16374	0.00113836	0.0268738	0.0237359	RPL5/RPL14/GTF3A/NOP53/RPL11/RPL7/RPL35A/RPL26	8
GO:0055085	transmembrane transport	61/1705	396/16374	0.00115336	0.0268971	0.0237565	SLC44A2/YWHAQ/SEL1L/PSMC6/EIF2S2/ABCA3/SLC44A1/SLC6A1/AZIN1/ABCF1/RALBP1/MFSD10/SLC25A39/PSMB1/ERLIN2/OS9/SPNS1/LRRC8B/ANKH/PSMD3/PSMD7/DERL1/NIPA1/PSMB4/PSMD8/SCN1A/PSMD2/PSMB5/SCN3A/P2RX7/LRRC8A/OAZ2/TMEM150C/PSMA7/GPR155/PSMA4/NALCN/SLCO3A1/KCNQ2/AQP4/MFSD12/PSMB3/SLC25A44/ADD2/KCNJ6/SLC2A13/SCN9A/UBC/SLC25A6/KCNQ5/CACNA1E/HCN1/SLC22A17/ABCA2/SV2A/SLC25A4/UBB/ASIC2/CACNA1B/CACNA2D3/KCNB2	61
GO:0050803	regulation of synapse structure or activity	9/1705	27/16374	0.00115532	0.0268971	0.0237565	DAG1/APP/SYNGAP1/SLITRK2/PPT1/CDH8/PTPRO/SPARC/TUBB	9
GO:1905606	regulation of presynapse assembly	9/1705	27/16374	0.00115532	0.0268971	0.0237565	VPS35/APP/EIF4G1/SLITRK2/CLSTN3/LRFN5/IL1RAPL1/LRFN4/PTPRD	9
GO:0048678	response to axon injury	13/1705	49/16374	0.00116984	0.0269865	0.0238355	RGMA/PTPRS/DPYSL3/INPP5F/PTPRF/SARM1/RANGAP1/BAX/EPHA4/SOD1/CST3/GRN/LGALS1	13
GO:0071349	cellular response to interleukin-12	13/1705	49/16374	0.00116984	0.0269865	0.0238355	HNRNPA2B1/CD47/ARF1/CDC42/HNRNPDL/P4HB/SNRPA1/TCP1/TALDO1/SIRPA/PPIA/SOD1/RPLP0	13
GO:0022607	cellular component assembly	41/1705	242/16374	0.00118287	0.027163	0.0239914	ATRX/HP1BP3/NAP1L1/RAPGEF2/PTPN11/SMARCA5/DDX3X/NPM1/HSP90AA1/PCDH17/EZR/CDC42/VPS35/FLNA/APP/NLGN2/ULK1/EIF4G1/LMO4/STXBP1/SLITRK2/H1F0/H3F3B/NOP53/BRD2/SOX9/PIH1D1/RPS3/HIST1H4C/SET/BRK1/NRXN2/CLSTN3/TSPYL2/LRFN5/PINK1/HSPA8/IL1RAPL1/GFAP/LRFN4/PTPRD	41
GO:0019752	carboxylic acid metabolic process	14/1705	55/16374	0.00119348	0.0272826	0.024097	PSMC6/AZIN1/ODC1/PSMB1/PSMD3/PSMD7/PSMB4/PSMD8/PSMD2/PSMB5/OAZ2/PSMA7/PSMA4/PSMB3	14
GO:0016192	vesicle-mediated transport	53/1705	334/16374	0.00120723	0.0274725	0.0242647	RAB21/FNBP1L/SNX3/TMED10/CD47/SCARA3/NCS1/ARF1/CDC42/PRKCI/CPNE3/NRP1/SFT2D2/CPNE1/RACK1/AP1B1/MLC1/RAB14/STXBP6/ACTR1A/SIRPA/CHMP1A/P2RX7/RTN3/YKT6/GSN/TMED2/SYT11/NCALD/RAPGEF4/APOE/VAMP3/SYT1/CSK/RIT2/LMAN2/ELMO1/SOD1/S100A10/GAS6/SCAMP5/AP2M1/AP2S1/SYT4/ADGRB1/CALY/CALR/IL1RAPL1/CLIP3/RIMS2/ATP6AP1/KIF5A/NDRG4	53
GO:0045471	response to ethanol	23/1705	113/16374	0.0012308	0.0278835	0.0246277	ACTR2/HDAC2/RPL10A/FGFR2/MT-CYB/RHOA/EIF4G1/MT-ND4/DMAP1/TUFM/MAOB/HMGCR/GSN/UNC79/GSTP1/GOT2/CNR1/SDF4/GRIN2A/SOD1/SPARC/GRIN1/PHB	23
GO:0070555	response to interleukin-1	24/1705	120/16374	0.00125953	0.0284069	0.02509	PSMC6/UBE2N/PRKCI/APP/SQSTM1/PSMB1/RBX1/PSMD3/PSMD7/PSMB4/PSMD8/TOLLIP/PSMD2/PSMB5/SKP1/PSMA7/PSMA4/NFKBIA/PSMB3/RELA/IRAK1/UBC/AES/UBB	24
GO:0032781	positive regulation of ATPase activity	11/1705	38/16374	0.00127114	0.0284151	0.0250972	DNAJB6/TOR1AIP2/TPM1/AHSA1/ATP1B1/ATP1B2/DNAJA2/GABARAPL2/DNAJB1/DNAJA1/DNAJB2	11
GO:0099173	postsynapse organization	11/1705	38/16374	0.00127114	0.0284151	0.0250972	CNKSR2/NRP1/NLGN2/EGLN1/CDKL5/ABHD17A/NRXN2/NDRG1/HSPA8/IL1RAPL1/EPHA7	11
GO:0016310	phosphorylation	59/1705	382/16374	0.00129092	0.0287302	0.0253755	CSNK1D/PTGES3/CCDC88A/HSP90AA1/CCND2/PANK3/PLXNB2/ITGA6/NPTN/PAPSS1/CDK5RAP3/PDXK/APP/NRP1/SQSTM1/PPP1R15B/SDCBP/ACVR2A/RACK1/PARK7/CRKL/PAK1/AKT1/RHOA/ERP29/KRAS/NTRK2/SEMA4D/TOLLIP/SIRPA/DYNLL1/SLIT2/CTDSP1/TERF2IP/RAC1/EDNRB/RAP2A/NOP53/PDE12/DSCAM/SLC25A23/TADA3/CHP1/SOX9/CADM4/DVL1/NUPR1/PPP1R14B/PIN1/COASY/GAS6/PINK1/CLIP3/FKBP8/HSPB1/EPHA7/PRNP/CKB/MT3	59
GO:0033365	protein localization to organelle	20/1705	94/16374	0.00142024	0.0313775	0.0277138	HNRNPU/LMNA/CCDC88A/CDK5RAP3/DDRGK1/SORL1/PARK7/AKT1/TMEM98/TRIM8/SKP1/TOPORS/ABHD17B/STK11/ABHD17A/PARP1/RTN4/PIN1/HSPA5/PINK1	20
GO:0045540	regulation of cholesterol biosynthetic process	10/1705	33/16374	0.00142666	0.0313775	0.0277138	KPNB1/HMGCS1/SQLE/IDI1/HMGCR/MVD/SC5D/FASN/SCD/RAN	10
GO:0060548	negative regulation of cell death	13/1705	50/16374	0.00143251	0.0313775	0.0277138	BNIP3L/VPS35/PARK7/CACYBP/LRPAP1/CLU/PDE12/BNIP3/SOX4/HSPA1B/CST3/SOX11/HSPA1A	13
GO:0002576	platelet degranulation	25/1705	128/16374	0.00143472	0.0313775	0.0277138	FAM49B/FAM3C/LAMP2/WDR1/FLNA/APP/APLP2/TLN1/MAGED2/STXBP1/CLU/CD9/CHID1/CD63/VEGFB/PCDH7/SOD1/TIMP1/SPARC/GAS6/LGALS3BP/PSAP/CALM1/SCG3/TMSB4X	25
GO:0021785	branchiomotor neuron axon guidance	4/1705	6/16374	0.0014783	0.0315415	0.0278585	MYCBP2/NRP1/PLXNA3/PLXNA4	4
GO:0044091	membrane biogenesis	4/1705	6/16374	0.0014783	0.0315415	0.0278585	SPTBN1/SERINC1/CLIP3/ANK3	4
GO:2000480	negative regulation of cAMP-dependent protein kinase activity	4/1705	6/16374	0.0014783	0.0315415	0.0278585	PRKAR1B/PRKAR1A/PRKAR2B/PKIA	4
GO:0007020	microtubule nucleation	7/1705	18/16374	0.00147968	0.0315415	0.0278585	AKAP9/CSNK1D/TUBGCP2/TUBGCP6/EML2/HSPA1B/HSPA1A	7
GO:0050775	positive regulation of dendrite morphogenesis	7/1705	18/16374	0.00147968	0.0315415	0.0278585	CAPRIN1/RAB21/CDKL5/OBSL1/EPHA4/IL1RAPL1/PTPRD	7
GO:0098927	vesicle-mediated transport between endosomal compartments	7/1705	18/16374	0.00147968	0.0315415	0.0278585	MAPK1/RAB21/SNX3/EZR/SORL1/PTPN23/MAP2K2	7
GO:0006469	negative regulation of protein kinase activity	17/1705	75/16374	0.00152911	0.0324582	0.0286683	PPM1E/TAF7/PARK7/PKN1/AKT1/GMFB/TRIB2/DUSP3/GSTP1/MLLT1/CHP1/PTPRT/DVL1/YWHAG/GADD45B/HSPB1/CAMK2N1	17
GO:0034314	Arp2/3 complex-mediated actin nucleation	9/1705	28/16374	0.00154701	0.0325646	0.0287622	ABI2/ARPC2/ACTR2/ARF1/ARPC3/WASF1/BRK1/ARPC5/PICK1	9
GO:0051204	protein insertion into mitochondrial membrane	9/1705	28/16374	0.00154701	0.0325646	0.0287622	NMT1/YWHAQ/YWHAE/PDCD5/PPP1R13B/YWHAZ/YWHAG/YWHAH/YWHAB	9
GO:0007566	embryo implantation	11/1705	39/16374	0.00160626	0.0334414	0.0295366	SPP1/DDR1/IGFBP7/FKBP4/H3F3B/TRO/BSG/SOD1/RPL29/TRIM28/CST3	11
GO:0010243	response to organonitrogen compound	11/1705	39/16374	0.00160626	0.0334414	0.0295366	SEL1L/MGST3/SEC61B/SELENOS/MT-ND5/DERL1/HERPUD1/AUP1/BAG6/UBXN1/HSP90B1	11
GO:0051258	protein polymerization	26/1705	136/16374	0.00160852	0.0334414	0.0295366	CAMSAP2/AKAP9/MAPT/CSNK1D/HSP90AA1/NUMA1/TUBGCP2/STMN2/GRB2/PAK1/VDAC2/RHOA/FKBP4/SLIT2/RAC1/TUBGCP6/BAG4/EML2/RPS3/MAP1B/STMN1/PAK3/GPX4/PINK1/CLIP3/TENM1	26
GO:0021782	glial cell development	12/1705	45/16374	0.00170606	0.0353238	0.0311993	MAPT/DAG1/ADAM22/APP/ID4/NTRK2/SOX4/B4GALT6/PICK1/CSPG5/SOX11/NRG1	12
GO:0051259	protein complex oligomerization	22/1705	109/16374	0.00174081	0.0358961	0.0317047	KHDRBS1/MAPT/TMED10/NPM1/DDIT3/VPS35/KHDRBS3/SORL1/RACK1/MLC1/STX2/PFKL/CLU/P2RX7/CRYAB/APOE/GJA1/CHP1/AHNAK/BAX/TRIM28/IRAK1	22
GO:0031124	mRNA 3'-end processing	17/1705	76/16374	0.00178226	0.0366015	0.0323278	SRSF11/PAPOLA/SRRM1/RNPS1/PCF11/ZFP36L1/SRSF2/SRSF3/CPEB3/PABPN1/THOC7/RBM8A/NCBP2/DDX39A/U2AF2/SRSF9/SLU7	17
GO:0044237	cellular metabolic process	24/1705	123/16374	0.0017916	0.0366445	0.0323657	KHDRBS1/EIF3H/LARP1/DDX3X/EIF5/EIF3K/GRB2/VDAC1/EIF4H/EIF4G1/NCBP2/EIF4G2/EIF4A2/PDK4/RNF41/CRYAB/RPS6KB2/EIF1/BNIP3/FASN/EIF1B/PINK1/HSPB1/MT3	24
GO:0007214	gamma-aminobutyric acid signaling pathway	6/1705	14/16374	0.00181235	0.0369194	0.0326085	GABBR1/GABRA2/SLC12A2/ATF4/PLCL1/GABRB3	6
GO:0032212	positive regulation of telomere maintenance via telomerase	10/1705	34/16374	0.00183501	0.0372309	0.0328836	MAPK1/CCT4/CCT2/CCT3/CCT5/CCT8/CCT6A/TCP1/HNRNPA1/CCT7	10
GO:0007016	obsolete cytoskeletal anchoring at plasma membrane	5/1705	10/16374	0.00195664	0.039226	0.0346458	EZR/DAG1/TLN1/EPB41L3/ANK3	5
GO:0036376	sodium ion export across plasma membrane	5/1705	10/16374	0.00195664	0.039226	0.0346458	ATP1A2/SLC8A1/ATP1B1/ATP1B2/ATP1A1	5
GO:0075522	IRES-dependent viral translational initiation	5/1705	10/16374	0.00195664	0.039226	0.0346458	EIF3A/EIF3F/SSB/PTBP1/MCTS1	5
GO:0014047	glutamate secretion	11/1705	40/16374	0.0020102	0.0401404	0.0354534	GLS/GIPC1/PPFIA2/SLC38A2/NTRK2/STXBP1/P2RX7/SYT1/SYT4/GRM7/RIMS1	11
GO:0001844	protein insertion into mitochondrial membrane involved in apoptotic signaling pathway	9/1705	29/16374	0.00203848	0.0405449	0.0358107	NMT1/YWHAQ/YWHAE/PPP1R13B/YWHAZ/BAX/YWHAG/YWHAH/YWHAB	9
GO:0090307	mitotic spindle assembly	13/1705	52/16374	0.00210541	0.0416266	0.0367661	KIF2A/KPNB1/HNRNPU/KIF3B/SMC3/FLNA/MAP9/RHOA/CHMP5/CHMP1A/HSPA1B/CCSAP/HSPA1A	13
GO:0006275	regulation of DNA replication	7/1705	19/16374	0.00213406	0.0416266	0.0367661	RBBP6/NUCKS1/CCDC88A/SMC3/EHMT2/PPP2R1A/ID3	7
GO:0010288	response to lead ion	7/1705	19/16374	0.00213406	0.0416266	0.0367661	PPP2CB/MAPT/SLC6A1/BACE1/APP/QDPR/SPARC	7
GO:0097062	dendritic spine maintenance	7/1705	19/16374	0.00213406	0.0416266	0.0367661	VPS35/ABHD17B/APOE/PICK1/HOMER1/ZNF804A/PRNP	7
GO:2001243	negative regulation of intrinsic apoptotic signaling pathway	7/1705	19/16374	0.00213406	0.0416266	0.0367661	DDX3X/IVNS1ABP/VDAC2/NOC2L/HERPUD1/NDUFS3/PINK1	7
GO:0006888	endoplasmic reticulum to Golgi vesicle-mediated transport	28/1705	153/16374	0.00215008	0.0417777	0.0368996	DYNC1LI2/VAPA/MIA3/TMED10/DYNC1H1/DYNC1I2/SPTAN1/ARF1/SPTBN1/ARFGAP1/COPZ1/NRBP1/SEC22C/SORL1/TMED3/ARCN1/ACTR1A/DYNLL1/YKT6/TMED2/RNF139/TMED9/GAS6/COPE/DCTN3/DYNLL2/DYNC1I1/ANK3	28
GO:0018209	peptidyl-serine modification	22/1705	111/16374	0.00221683	0.0429097	0.0378994	AKAP9/HSP90AA1/INPP5F/APP/TXN/PDE4D/RACK1/PARK7/PAK1/AKT1/EIF4G1/NTRK2/TERF2IP/PLCL1/BAG4/BAX/RASSF2/HSP90AB1/GAS6/DDIT4/PINK1/TENM1	22
GO:0007018	microtubule-based movement	10/1705	35/16374	0.00233277	0.0448105	0.0395782	KTN1/KIF2A/KIFAP3/DYNC1I2/KIF3A/KIF3B/KLC1/DYNLRB1/KIF3C/KIF5A	10
GO:0072583	clathrin-dependent endocytosis	10/1705	35/16374	0.00233277	0.0448105	0.0395782	CLTC/FNBP1L/SNAP91/INPP5F/DNM1/DNAJC6/CANX/SYT11/AP2M1/AP2S1	10
GO:0043933	protein-containing complex subunit organization	15/1705	65/16374	0.00234522	0.044879	0.0396387	PTPN11/DDX3X/HSP90AA1/CDC42/ULK1/LMO4/STXBP1/NOP53/BNIP3/PIH1D1/RPS3/BRK1/PINK1/HSPA8/GFAP	15
GO:0038096	Fc-gamma receptor signaling pathway involved in phagocytosis	17/1705	78/16374	0.00239497	0.045658	0.0403268	MAPK1/ARPC2/BAIAP2/CRK/HSP90AA1/CD47/ACTR2/CDC42/GRB2/ARPC3/PAK1/RAC1/ELMO1/BRK1/ARPC5/HSP90AB1/ACTB	17
GO:0060996	dendritic spine development	14/1705	59/16374	0.00245468	0.0466205	0.0411769	UBA6/PTPRS/ACSL4/ARF1/CDC42/HDAC2/CPEB3/DLG4/CDKL5/APOE/SLC9A6/DVL1/PAK3/CAMK2B	14
GO:0071774	response to fibroblast growth factor	18/1705	85/16374	0.00253832	0.0480284	0.0424204	HNRNPH1/MAPK1/POLR2B/PTPN11/POLR2A/GRB2/FGFR2/CRKL/RAB14/HNRNPA1/NCBP2/PTBP1/FAT4/POLR2E/IER2/GTF2F1/POLR2L/FGF12	18
GO:0048708	astrocyte differentiation	12/1705	47/16374	0.0025489	0.0480488	0.0424384	IL6ST/ID4/PRPF19/DAB1/SOX9/EPHA4/VIM/ID2/S100B/GPR37L1/PLP1/MT3	12
GO:0001934	positive regulation of protein phosphorylation	26/1705	141/16374	0.00272337	0.050763	0.0448357	CSNK1D/HSP90AA1/CCND2/NPTN/APP/SQSTM1/ACVR2A/RACK1/CRKL/PAK1/AKT1/ERP29/KRAS/NTRK2/SEMA4D/RAC1/EDNRB/RAP2A/SOX9/DVL1/PIN1/GAS6/PINK1/CLIP3/EPHA7/MT3	26
GO:0010833	telomere maintenance via telomere lengthening	15/1705	66/16374	0.00274859	0.050763	0.0448357	HNRNPA2B1/MAPK1/HNRNPU/CCT4/CCT2/CCT3/CCT5/CCT8/CCT6A/TCP1/HNRNPA1/TERF2IP/PARP1/CTC1/CCT7	15
GO:0002028	regulation of sodium ion transport	6/1705	15/16374	0.00275639	0.050763	0.0448357	WNK1/DMPK/SLC8A1/P2RX7/ATP1A1/YWHAH	6
GO:0061136	regulation of proteasomal protein catabolic process	6/1705	15/16374	0.00275639	0.050763	0.0448357	USP14/TMF1/NFE2L1/APOE/PINK1/UBB	6
GO:1990000	amyloid fibril formation	6/1705	15/16374	0.00275639	0.050763	0.0448357	MAPT/APP/CLU/CRYAB/GSN/APOE	6
GO:0006520	cellular amino acid metabolic process	17/1705	79/16374	0.00276178	0.050763	0.0448357	PSMC6/AZIN1/ODC1/PSMB1/SLC7A5/PSMD3/PSMD7/ATF4/PSMB4/QDPR/PSMD8/PSMD2/PSMB5/OAZ2/PSMA7/PSMA4/PSMB3	17
GO:0032940	secretion by cell	25/1705	134/16374	0.00276323	0.050763	0.0448357	RAB21/TNFRSF1A/EZR/NCS1/ARF1/ERP29/STXBP6/P2RX7/HMGCR/PCSK6/PPIA/RAPGEF4/APOE/VAMP3/ATP13A2/SYT1/APBB1/FRMD4A/GRK2/SYT4/GRM7/IL1RAPL1/RIMS2/ATP6AP1/SRCIN1	25
GO:0035307	positive regulation of protein dephosphorylation	8/1705	25/16374	0.00289888	0.0526803	0.0465291	DLC1/PTPA/PTBP1/PIN1/CALM3/NSMF/PINK1/CALM1	8
GO:0043113	receptor clustering	8/1705	25/16374	0.00289888	0.0526803	0.0465291	FLNA/SYNGAP1/CRKL/MESD/GSN/DVL1/PICK1/CD81	8
GO:1900740	positive regulation of protein insertion into mitochondrial membrane involved in apoptotic signaling pathway	8/1705	25/16374	0.00289888	0.0526803	0.0465291	NMT1/YWHAQ/YWHAE/PPP1R13B/YWHAZ/YWHAG/YWHAH/YWHAB	8
GO:0030182	neuron differentiation	44/1705	277/16374	0.00294117	0.0532573	0.0470388	WNK1/DDX6/MAPT/GPRC5B/DPYSL3/FZD3/CDK5RAP3/APP/UGCG/CPNE1/MTPN/HS6ST1/RHOA/HIPK1/EIF4G1/PPP1CC/CYB5D2/TIMP2/NTRK2/ATF4/BRSK2/VXN/PPT1/HDAC5/ATP2B2/CTDSP1/BRSK1/PRPF19/IER2/DAB1/CEBPB/ID2/EPHA5/PIN1/YWHAG/YWHAH/DDIT4/HSPA5/SOX11/GPR37L1/CALR/NRG1/IL1RAPL1/PTPRD	44
GO:0034067	protein localization to Golgi apparatus	7/1705	20/16374	0.00299118	0.0533973	0.0471624	CSNK1D/SORL1/ARFRP1/ARL1/OBSL1/BICD2/OPTN	7
GO:0048169	regulation of long-term neuronal synaptic plasticity	7/1705	20/16374	0.00299118	0.0533973	0.0471624	APP/SYNGAP1/DLG4/KRAS/SYNGR1/GRIN1/CAMK2B	7
GO:0048846	axon extension involved in axon guidance	7/1705	20/16374	0.00299118	0.0533973	0.0471624	ALCAM/NRP1/MEGF8/PLXNA3/SLIT2/DSCAM/PLXNA4	7
GO:1901673	regulation of mitotic spindle assembly	7/1705	20/16374	0.00299118	0.0533973	0.0471624	HNRNPU/SMC3/CHMP5/CHMP1A/HSPA1B/CCSAP/HSPA1A	7
GO:0000226	microtubule cytoskeleton organization	19/1705	93/16374	0.00300877	0.0535223	0.0472728	KIF2A/SON/CAMSAP2/MAPT/CRMP1/MAP6/PCNT/RHOA/FKBP4/APC2/OBSL1/EML2/BICD2/HSPA1B/FAM107A/STMN1/MAP1A/CNP/HSPA1A	19
GO:0008543	fibroblast growth factor receptor signaling pathway	20/1705	100/16374	0.00307905	0.0545802	0.0482072	HNRNPH1/MAPK1/FAM20C/POLR2B/PTPN11/NPTN/POLR2A/GRB2/FGFR2/CRKL/RAB14/HNRNPA1/NCBP2/PTBP1/FAT4/POLR2E/GTF2F1/GPC1/POLR2L/FGF12	20
GO:0021859	pyramidal neuron differentiation	4/1705	7/16374	0.0031648	0.0547553	0.0483618	SLC4A10/FGFR2/PLXNA3/UQCRQ	4
GO:0021860	pyramidal neuron development	4/1705	7/16374	0.0031648	0.0547553	0.0483618	SLC4A10/FGFR2/PLXNA3/UQCRQ	4
GO:0045822	negative regulation of heart contraction	4/1705	7/16374	0.0031648	0.0547553	0.0483618	ATP1A2/PDE4D/ATP2A2/ATP1A1	4
GO:0045955	negative regulation of calcium ion-dependent exocytosis	4/1705	7/16374	0.0031648	0.0547553	0.0483618	STXBP3/GNAI2/CBARP/SYT4	4
GO:0048671	negative regulation of collateral sprouting	4/1705	7/16374	0.0031648	0.0547553	0.0483618	PTPRS/ULK2/FGF13/EPHA7	4
GO:0072383	plus-end-directed vesicle transport along microtubule	4/1705	7/16374	0.0031648	0.0547553	0.0483618	KIF5B/KIFAP3/KIF3A/KIF3B	4
GO:1990144	intrinsic apoptotic signaling pathway in response to hypoxia	4/1705	7/16374	0.0031648	0.0547553	0.0483618	ENO1/TMBIM6/BNIP3/PINK1	4
GO:0071347	cellular response to interleukin-1	27/1705	150/16374	0.00324816	0.0552522	0.0488007	PSMC6/UBE2N/CD47/SQSTM1/YY1/PSMB1/RBX1/PSMD3/PSMD7/PSMB4/PSMD8/OTUB1/TOLLIP/PSMD2/PSMB5/SIRPA/SKP1/PSMA7/PSMA4/NFKBIA/SOX9/PSMB3/CEBPB/RELA/IRAK1/UBC/UBB	27
GO:0006983	ER overload response	5/1705	11/16374	0.00328101	0.0552522	0.0488007	DDIT3/TMCO1/PPP1R15B/SELENOS/HSPA5	5
GO:0010763	positive regulation of fibroblast migration	5/1705	11/16374	0.00328101	0.0552522	0.0488007	PAK1/AKT1/SLC8A1/BAG4/PAK3	5
GO:0035107	appendage morphogenesis	5/1705	11/16374	0.00328101	0.0552522	0.0488007	FGFR2/SOX9/SOX4/SOX11/SEMA3C	5
GO:0060174	limb bud formation	5/1705	11/16374	0.00328101	0.0552522	0.0488007	FGFR2/SOX9/SOX4/SOX11/SEMA3C	5
GO:1902414	protein localization to cell junction	5/1705	11/16374	0.00328101	0.0552522	0.0488007	MAPT/KIF3A/NLGN2/ABHD17B/CLSTN3	5
GO:1905146	lysosomal protein catabolic process	5/1705	11/16374	0.00328101	0.0552522	0.0488007	LAMP2/VPS35/LAPTM4B/ATP13A2/MGAT3	5
GO:1990440	positive regulation of transcription from RNA polymerase II promoter in response to endoplasmic reticulum stress	5/1705	11/16374	0.00328101	0.0552522	0.0488007	DDIT3/ATF4/ATF3/CEBPB/HSPA5	5
GO:0009409	response to cold	9/1705	31/16374	0.00339015	0.0569005	0.0502565	ACADVL/HSP90AA1/HSPD1/MT-CO2/CDH8/ATP2B1/PCSK1N/VGF/THRA	9
GO:0072659	protein localization to plasma membrane	33/1705	195/16374	0.00344513	0.0575375	0.0508191	KIF5B/RAPGEF2/CLTC/PACS2/TNFRSF1A/EZR/PRKCI/SPTBN1/FAM126A/FLNA/SQSTM1/TMEM59/AKT1/PALM/STXBP1/DPP10/ATP1B1/TMED2/RAP2A/TMBIM1/EPB41L3/BSG/FGF13/BAG4/STX3/S100A10/GAS6/AP2M1/ACTB/CLIP3/KCNB2/ANK3/CD81	33
GO:0031647	regulation of protein stability	16/1705	74/16374	0.00345088	0.0575375	0.0508191	MAPK1/LMNA/LAMP2/USP7/CTSA/VPS35/KAT2A/GIPC1/KRAS/TADA3/STUB1/SOX4/TOMM7/FAM107A/HSPA8/CD81	16
GO:0030308	negative regulation of cell growth	23/1705	122/16374	0.0034844	0.0579052	0.051144	DDX3X/ENO1/RACK1/BTG1/FHL1/PPP2R1A/PPT1/SLIT2/CRYAB/STK11/ADAM15/ADIPOR1/GJA1/NDUFS3/APBB1/HSPA1B/RTN4/EI24/DNAJB2/TSPYL2/PHB/HSPA1A/MT3	23
GO:0006612	protein targeting to membrane	13/1705	55/16374	0.00358375	0.059167	0.0522584	SEC62/PRKCI/SEC61A1/TCAF1/SDCBP/PAK1/GDI1/CHP1/STOM/HSPA5/FIS1/PRNP/ANK3	13
GO:0006879	cellular iron ion homeostasis	13/1705	55/16374	0.00358375	0.059167	0.0522584	NDFIP1/EGLN1/HMOX1/ATP6V1G1/SKP1/FTL/NCOA4/ATP6V0D1/ATP13A2/FTH1/SOD1/SLC22A17/ATP6AP1	13
GO:0000422	autophagy of mitochondrion	11/1705	43/16374	0.0037383	0.0615175	0.0543344	BNIP3L/MAP1LC3B/SQSTM1/PARK7/VDAC1/RNF41/CISD2/BNIP3/ATP13A2/PINK1/FIS1	11
GO:0044238	primary metabolic process	28/1705	159/16374	0.00380634	0.0621359	0.0548806	PSMC6/GOLM1/ANGPTL4/AZIN1/APP/ODC1/HMGCS1/SMARCD3/EDF1/PSMB1/MTPN/PLIN2/PSMD3/PSMD7/PSMB4/PSMD8/PSMD2/PSMB5/FADS1/HMGCR/OAZ2/PSMA7/PSMA4/APOE/ADIPOR1/PSMB3/ID2/HSP90AB1	28
GO:0099560	synaptic membrane adhesion	8/1705	26/16374	0.00381048	0.0621359	0.0548806	PTPRS/PCDH17/PTPRF/SLITRK2/SPARCL1/LRFN5/LRFN4/PTPRD	8
GO:0008104	protein localization	43/1705	273/16374	0.00381277	0.0621359	0.0548806	DNAJB6/MAPT/CLTC/MYCBP2/TMED10/NPM1/HSP90AA1/CLTA/SNX27/CTSA/NPTN/VPS35/SQSTM1/RACK1/AP1B1/RAB14/ULK1/ERP29/ARCN1/RSL1D1/TMED2/SLU7/PARP1/RAB35/CUTA/RIT2/MGAT3/DVL1/BCAP31/CSNK1E/MYRIP/HSP90AB1/AP2M1/AP2S1/YWHAH/CLTB/MAP1A/RIMS1/RIMS2/CADM3/SCG5/REEP1/CD81	43
GO:0008045	motor neuron axon guidance	6/1705	16/16374	0.00402537	0.0636006	0.0561743	ALCAM/CHN1/KIF5C/SLIT2/EPHA4/PLXNA4	6
GO:0010644	cell communication by electrical coupling	6/1705	16/16374	0.00402537	0.0636006	0.0561743	PDE4D/SLC8A1/GJA1/CALM3/CALM1/ANK3	6
GO:0045047	protein targeting to ER	6/1705	16/16374	0.00402537	0.0636006	0.0561743	SEC62/SEC61A1/TRAM1/SEC61G/SRP14/HSPA5	6
GO:0055119	relaxation of cardiac muscle	6/1705	16/16374	0.00402537	0.0636006	0.0561743	ATP1A2/PDE4D/ATP2A2/SLC8A1/ATP1B1/ATP1A1	6
GO:2000059	negative regulation of ubiquitin-dependent protein catabolic process	6/1705	16/16374	0.00402537	0.0636006	0.0561743	CSNK2A1/SGTA/RPL5/RPL23/RPL11/RPS7	6
GO:0033598	mammary gland epithelial cell proliferation	7/1705	21/16374	0.0040885	0.0636006	0.0561743	MAPK1/DEAF1/BAX/PHB2/CEBPB/ID2/RTN4	7
GO:0036499	PERK-mediated unfolded protein response	7/1705	21/16374	0.0040885	0.0636006	0.0561743	DDIT3/PPP1R15B/ATF4/HERPUD1/ATF3/PPP1R15A/HSPA5	7
GO:0046903	secretion	7/1705	21/16374	0.0040885	0.0636006	0.0561743	ACSL3/PRKCI/POFUT2/VAMP3/CA2/NRG1/RIMS1	7
GO:0050771	negative regulation of axonogenesis	7/1705	21/16374	0.0040885	0.0636006	0.0561743	SYNGAP1/RHOA/GDI1/DAB1/RTN4/LINGO1/ARHGDIA	7
GO:0086009	membrane repolarization	7/1705	21/16374	0.0040885	0.0636006	0.0561743	AKAP9/YWHAE/ATP1A2/CACNA2D1/ATP1B1/ATP1B2/ATP1A1	7
GO:0031204	posttranslational protein targeting to membrane, translocation	3/1705	4/16374	0.00415745	0.0636006	0.0561743	SEC62/SEC61A1/HSPA5	3
GO:0035964	COPI-coated vesicle budding	3/1705	4/16374	0.00415745	0.0636006	0.0561743	TMED10/TMED2/TMED9	3
GO:0048205	COPI coating of Golgi vesicle	3/1705	4/16374	0.00415745	0.0636006	0.0561743	TMED10/TMED2/TMED9	3
GO:0051645	Golgi localization	3/1705	4/16374	0.00415745	0.0636006	0.0561743	STK25/STK11/DAB1	3
GO:0099639	neurotransmitter receptor transport, endosome to plasma membrane	3/1705	4/16374	0.00415745	0.0636006	0.0561743	GRIPAP1/VPS35/ARHGAP44	3
GO:1902255	positive regulation of intrinsic apoptotic signaling pathway by p53 class mediator	3/1705	4/16374	0.00415745	0.0636006	0.0561743	RPL11/RPS7/UBB	3
GO:1902950	regulation of dendritic spine maintenance	3/1705	4/16374	0.00415745	0.0636006	0.0561743	VPS35/ABHD17B/HOMER1	3
GO:1905323	telomerase holoenzyme complex assembly	3/1705	4/16374	0.00415745	0.0636006	0.0561743	PTGES3/HSP90AA1/HSP90AB1	3
GO:1905908	positive regulation of amyloid fibril formation	3/1705	4/16374	0.00415745	0.0636006	0.0561743	APP/CLU/APOE	3
GO:2001135	regulation of endocytic recycling	3/1705	4/16374	0.00415745	0.0636006	0.0561743	INPP5F/RAB11B/NDRG4	3
GO:0038061	NIK/NF-kappaB signaling	28/1705	160/16374	0.00416702	0.0636006	0.0561743	PSMC6/APP/PSMB1/CPNE1/AKT1/RHOA/PSMD3/PSMD7/PSMB4/PSMD8/PSMD2/PSMB5/SKP1/LITAF/TERF2IP/PSMA7/PSMA4/NFKBIA/ADIPOR1/PPP4C/PSMB3/RELA/RPS3/RASSF2/IRAK1/CALR/PRDX1/TMSB4X	28
GO:0006278	RNA-dependent DNA biosynthetic process	13/1705	56/16374	0.00423146	0.0643896	0.0568712	MAPK1/HNRNPU/CCT4/CCT2/CCT3/CCT5/CCT8/CCT6A/TCP1/HNRNPA1/PPIA/CTC1/CCT7	13
GO:0071276	cellular response to cadmium ion	9/1705	32/16374	0.00428814	0.0650561	0.0574598	MAPK1/JUN/AKT1/HMOX1/GSN/SOD1/MT1X/MT1E/MT3	9
GO:0006814	sodium ion transport	22/1705	117/16374	0.00435292	0.0658412	0.0581532	WNK1/SLC23A2/DMPK/ARF1/ATP1A2/SLC4A8/SLC4A10/AKT1/SLC38A2/SNTA1/SLC6A8/SCN1A/SCN3A/SLC8A1/P2RX7/FGF13/ATP1A1/YWHAH/SCN9A/SGK1/FGF12/ANK3	22
GO:0021987	cerebral cortex development	16/1705	76/16374	0.00455598	0.0685035	0.0605047	PTPRS/YWHAE/CRK/ADGRG1/FLNA/CRKL/RHOA/SLC38A2/NTRK2/LRP8/FAT4/BNIP3/CNTNAP2/FGF13/BAX/GRIN1	16
GO:0090090	negative regulation of canonical Wnt signaling pathway	28/1705	161/16374	0.00455605	0.0685035	0.0605047	CHD8/PSMC6/DDIT3/PSMB1/RBX1/PSMD3/PSMD7/PSMB4/PSMD8/PSMD2/PSMB5/TMEM170B/EMD/PFDN5/APC2/PSMA7/PSMA4/STK11/APOE/RUVBL2/SOX9/PSMB3/PTPRO/DVL1/HECW1/DKK3/AES/AMER2	28
GO:0016482	cytosolic transport	8/1705	27/16374	0.00492844	0.0738827	0.0652558	MAPK1/RAB21/SNX3/ACTR2/EZR/SORL1/PTPN23/MAP2K2	8
GO:0015672	monovalent inorganic cation transport	13/1705	57/16374	0.00497035	0.0742905	0.065616	KIF5B/WNK1/DMPK/AKT1/FHL1/ATF4/SLC8A1/P2RX7/ATP1A1/YWHAH/ASIC2/FGF12/ANK3	13
GO:0007039	protein catabolic process in the vacuole	5/1705	12/16374	0.00514593	0.0753544	0.0665556	VPS35/LAPTM4B/ATP13A2/MGAT3/CD81	5
GO:0008334	histone mRNA metabolic process	5/1705	12/16374	0.00514593	0.0753544	0.0665556	SSB/SNRPE/SNRPG/NCBP2/SNRPB	5
GO:0010917	negative regulation of mitochondrial membrane potential	5/1705	12/16374	0.00514593	0.0753544	0.0665556	MAPT/BNIP3L/ARL6IP5/BNIP3/BAX	5
GO:0031115	negative regulation of microtubule polymerization	5/1705	12/16374	0.00514593	0.0753544	0.0665556	STMN2/FKBP4/EML2/STMN1/CLIP3	5
GO:0051642	centrosome localization	5/1705	12/16374	0.00514593	0.0753544	0.0665556	DYNC1LI2/KIF5B/RANBP2/BICD2/SUN2	5
GO:0071786	endoplasmic reticulum tubular network organization	5/1705	12/16374	0.00514593	0.0753544	0.0665556	LNPK/RTN3/REEP2/RTN4/REEP1	5
GO:1900272	negative regulation of long-term synaptic potentiation	5/1705	12/16374	0.00514593	0.0753544	0.0665556	APP/APOE/EPHA4/FAM107A/PRNP	5
GO:0050806	positive regulation of synaptic transmission	12/1705	51/16374	0.00524325	0.0765575	0.0676183	NPTN/APP/SQSTM1/DLG4/LGMN/APOE/SYT1/EPHA4/GRIN2A/FAM107A/ADCY1/PRNP	12
GO:0001649	osteoblast differentiation	34/1705	208/16374	0.00528555	0.0769528	0.0679674	HNRNPU/FAM20C/SNRNP200/CLTC/DDX21/IL6ST/CEBPD/DDX5/SYNCRIP/RRBP1/MEF2D/TPM4/FGFR2/ACVR2A/AKT1/ID4/RSL1D1/SEMA4D/ESRRA/COL6A1/H3F3B/GJA1/CEBPB/FASN/RASSF2/ID2/GNAS/ID3/SOX11/TOB1/ATP5F1B/PHB/ATP6AP1/JUNB	34
GO:0031103	axon regeneration	9/1705	33/16374	0.00536119	0.0776067	0.068545	RGMA/PTPRS/INPP5F/PTPRF/DAG1/JUN/EPHA4/GRN/DHFR	9
GO:0045815	positive regulation of gene expression, epigenetic	9/1705	33/16374	0.00536119	0.0776067	0.068545	SF3B1/DDX21/SMARCA5/WBP2/KAT2A/POLR2E/TWISTNB/POLR2L/ACTB	9
GO:0048666	neuron development	32/1705	193/16374	0.00538521	0.0776896	0.0686182	VAPA/WNK1/HERC1/HDGFL3/MAPT/RAPGEF2/DPYSL3/HSP90AA1/GNAO1/APP/UGCG/BTBD8/WDR5/HS6ST1/ULK1/MICALL2/PPT1/TOPORS/FAT4/APOE/CNTNAP2/RAB35/PRMT1/ID2/B4GALT6/EPHA5/STX3/HSP90AB1/CLMN/PSD/STMN3/OPCML	32
GO:0030334	regulation of cell migration	14/1705	64/16374	0.00539767	0.0776896	0.0686182	KIF2A/LMNA/SLK/FLNA/AKT1/RHOA/LMO4/RAC1/LDB2/MGAT3/BEX4/SGK1/UNC5C/SRCIN1	14
GO:0000715	nucleotide-excision repair, DNA damage recognition	7/1705	22/16374	0.00546523	0.0784384	0.0692796	DDB1/COPS6/RBX1/GPS1/PARP1/UBC/UBB	7
GO:0006613	cotranslational protein targeting to membrane	6/1705	17/16374	0.00567946	0.0801892	0.0708259	SEC62/SEC61A1/SSR1/TRAM1/SSR2/SRP14	6
GO:0034199	activation of protein kinase A activity	6/1705	17/16374	0.00567946	0.0801892	0.0708259	PRKACB/PRKAR1B/PRKAR1A/PRKAR2B/ADCY1/ADCY5	6
GO:0048814	regulation of dendrite morphogenesis	6/1705	17/16374	0.00567946	0.0801892	0.0708259	SARM1/SEMA4D/RAP2A/STK11/GRIN1/NSMF	6
GO:0050709	negative regulation of protein secretion	6/1705	17/16374	0.00567946	0.0801892	0.0708259	ERP29/HMGCR/APOE/FRMD4A/SYT4/SRCIN1	6
GO:0051443	positive regulation of ubiquitin-protein transferase activity	6/1705	17/16374	0.00567946	0.0801892	0.0708259	UBE2N/TOPORS/STUB1/PIN1/PINK1/RPS2	6
GO:0000027	ribosomal large subunit assembly	4/1705	8/16374	0.00580943	0.0801892	0.0708259	RPL5/NOP53/RPL11/RPL38	4
GO:0002480	antigen processing and presentation of exogenous peptide antigen via MHC class I, TAP-independent	4/1705	8/16374	0.00580943	0.0801892	0.0708259	LNPEP/HLA-E/HLA-A/B2M	4
GO:0006491	N-glycan processing	4/1705	8/16374	0.00580943	0.0801892	0.0708259	MGAT4B/MGAT4A/ST8SIA4/PRKCSH	4
GO:0032872	regulation of stress-activated MAPK cascade	4/1705	8/16374	0.00580943	0.0801892	0.0708259	MAPK1/GSTP1/MAP2K2/PRDX1	4
GO:0035067	negative regulation of histone acetylation	4/1705	8/16374	0.00580943	0.0801892	0.0708259	TAF7/CTBP1/NOC2L/SET	4
GO:0048791	calcium ion-regulated exocytosis of neurotransmitter	4/1705	8/16374	0.00580943	0.0801892	0.0708259	ATP2A2/SYT1/SYT4/RIMS2	4
GO:0051764	actin crosslink formation	4/1705	8/16374	0.00580943	0.0801892	0.0708259	BAIAP2/DPYSL3/FLNA/MARCKS	4
GO:0075713	establishment of integrated proviral latency	4/1705	8/16374	0.00580943	0.0801892	0.0708259	PSIP1/XRCC6/PPIA/BANF1	4
GO:0098693	regulation of synaptic vesicle cycle	4/1705	8/16374	0.00580943	0.0801892	0.0708259	DNAJC5/PRKAR1B/BSN/RAPGEF4	4
GO:0048709	oligodendrocyte differentiation	16/1705	78/16374	0.00593409	0.0816867	0.0721486	WDR1/DAG1/HDAC2/ID4/TMEM98/NTRK2/CD9/GSN/DAAM2/GSTP1/BNIP3/CSK/ID2/SOX11/NRG1/CNP	16
GO:0120031	plasma membrane bounded cell projection assembly	43/1705	280/16374	0.0060344	0.0828418	0.0731688	AKAP9/ARPC2/CSNK1D/YWHAE/FNBP1L/KIFAP3/CCDC88A/DPYSL3/DYNC1H1/HSP90AA1/DYNC1I2/ODF2L/KIF3A/CDC42/KIF3B/NRP1/PCNT/AKIRIN1/CCP110/IFT57/PALM/CDKL5/DYNLRB1/SSX2IP/PPP2R1A/ACTR1A/DYNLL1/P2RX7/SLIT2/EVI5L/RAC1/PRKAR2B/KIF3C/CSNK1E/BRK1/TENM2/YWHAG/DCTN3/RAP1GAP/DYNLL2/TUBB/TENM1/TUBB4B	43
GO:0006091	generation of precursor metabolites and energy	14/1705	65/16374	0.0062356	0.085372	0.0754035	RHOA/COX6C/PDE12/SLC25A23/RUNX1T1/NUPR1/ATP5F1B/PINK1/VGF/COX4I1/SLC25A4/COX7C/ATP5IF1/UQCR11	14
GO:0002474	antigen processing and presentation of peptide antigen via MHC class I	8/1705	28/16374	0.00628101	0.0855301	0.0755432	PDIA3/TAPBP/HLA-E/CANX/HLA-A/BCAP31/B2M/CALR	8
GO:0097485	neuron projection guidance	8/1705	28/16374	0.00628101	0.0855301	0.0755432	MYCBP2/FZD3/ALCAM/NRP1/SLIT2/EPHA4/TUBB2B/UNC5C	8
GO:0051168	nuclear export	11/1705	46/16374	0.006487	0.0880977	0.077811	KHDRBS1/PTPN11/YWHAE/TXN/PARK7/HNRNPA1/RANGAP1/PHAX/NCBP2/EMD/GAS6	11
GO:0007269	neurotransmitter secretion	16/1705	79/16374	0.00673976	0.0910408	0.0804105	DNAJC5/PPFIA2/STXBP1/PPT1/P2RX7/BRSK1/SYT11/SYT1/PTPRN2/KCNMB4/UNC13A/DVL1/NRXN2/HSPA8/RIMS1/CACNA1B	16
GO:0021766	hippocampus development	16/1705	79/16374	0.00673976	0.0910408	0.0804105	KIF5B/UBA6/PTPRS/YWHAE/CRK/CRKL/ID4/FEZ1/PLXNA3/LRP8/BCAN/DAB1/FGF13/EPHA5/UQCRQ/RAN	16
GO:0010256	endomembrane system organization	26/1705	151/16374	0.00696897	0.093886	0.0829235	MIA3/BAIAP2/CSNK1D/TOR1AIP2/DMPK/LNPK/LAMTOR1/CDC42/SPTBN1/SEC61A1/SQSTM1/DNM1/LAPTM4B/SURF4/ATL1/ARL1/SNX10/TMED2/FAT4/SYNGR1/OBSL1/TMED9/SUN2/OPTN/CIT/ANK3	26
GO:0030001	metal ion transport	12/1705	53/16374	0.00725468	0.0974751	0.0860934	KIF5B/WNK1/DMPK/AKT1/FHL1/ATF4/SLC8A1/P2RX7/ATP1A1/YWHAH/FGF12/ANK3	12
GO:0007568	aging	32/1705	197/16374	0.00731686	0.0980498	0.0866011	MAPK1/LMNA/RPN2/GNAO1/MT-CO1/DAG1/APP/GRB2/PDE4D/SLC12A2/JUN/AKT1/CACYBP/MT-ATP6/MT-ND4/TIMP2/CANX/FOXG1/HMGCR/ATP2B1/LITAF/GSN/EDNRB/RELA/CNR1/FZR1/TIMP1/IRAK1/GPX4/MBD3/CNP/PRNP	32
GO:0032091	negative regulation of protein binding	15/1705	73/16374	0.00745854	0.099421	0.0878121	SORL1/PARK7/AKT1/LRPAP1/TMBIM6/NES/STUB1/BAX/GTF2F1/DVL1/CSNK1E/PIN1/DNAJB2/ACTB/AES	15
GO:0060291	long-term synaptic potentiation	15/1705	73/16374	0.00745854	0.099421	0.0878121	MAPK1/NPTN/APP/SQSTM1/NTRK2/LGMN/APOE/EPHA4/S100B/GRIN2A/STX3/FAM107A/ADCY1/SHANK2/PRNP	15
GO:1901990	regulation of mitotic cell cycle phase transition	16/1705	80/16374	0.00763117	0.100391	0.0886692	DDB1/ANAPC5/PSMC6/PSMB1/PSMD3/PSMD7/PSMB4/PSMD8/PSMD2/PSMB5/SKP1/PSMA7/PSMA4/PSMB3/ANAPC11/FZR1	16
GO:0006883	cellular sodium ion homeostasis	5/1705	13/16374	0.00765268	0.100391	0.0886692	ATP1A2/SLC8A1/ATP1B1/ATP1B2/ATP1A1	5
GO:0014829	vascular smooth muscle contraction	5/1705	13/16374	0.00765268	0.100391	0.0886692	RHOA/SLC8A1/ATP2B1/DOCK5/CHRM3	5
GO:0032802	low-density lipoprotein particle receptor catabolic process	5/1705	13/16374	0.00765268	0.100391	0.0886692	CLTC/CLTA/APOE/AP2M1/AP2S1	5
GO:0007040	lysosome organization	11/1705	47/16374	0.00769031	0.100391	0.0886692	TMEM165/SCARB2/LAMTOR1/ARF1/VPS35/LAPTM4B/TMEM175/CHMP5/GAA/CLVS2/GRN	11
GO:0008542	visual learning	11/1705	47/16374	0.00769031	0.100391	0.0886692	DEAF1/NPTN/ATP1A2/APP/SYNGAP1/KRAS/HMGCR/FAM19A2/GRIN2A/GRIN1/NDRG4	11
GO:0035722	interleukin-12-mediated signaling pathway	11/1705	47/16374	0.00769031	0.100391	0.0886692	HNRNPA2B1/ARF1/CDC42/HNRNPDL/P4HB/SNRPA1/TCP1/TALDO1/PPIA/SOD1/RPLP0	11
GO:2000300	regulation of synaptic vesicle exocytosis	11/1705	47/16374	0.00769031	0.100391	0.0886692	PREPL/NCS1/BACE1/GIPC1/DVL1/GIT1/CSPG5/ADCY1/CALM3/STXBP5L/PRKCB	11
GO:0031333	negative regulation of protein-containing complex assembly	6/1705	18/16374	0.00777935	0.100772	0.0890058	DDX3X/CDC42/ULK1/LMO4/STXBP1/NOP53	6
GO:0034063	stress granule assembly	6/1705	18/16374	0.00777935	0.100772	0.0890058	MAPT/DDX3X/DYNC1H1/G3BP2/CIRBP/RPS23	6
GO:0042274	ribosomal small subunit biogenesis	6/1705	18/16374	0.00777935	0.100772	0.0890058	RPS6/RPS17/RPS7/RPS14/RPS16/RPS24	6
GO:0043001	Golgi to plasma membrane protein transport	8/1705	29/16374	0.00789721	0.102038	0.0901232	ACSL3/SPTBN1/RACK1/ARFRP1/VAMP3/CSK/OPTN/ANK3	8
GO:0007249	I-kappaB kinase/NF-kappaB signaling	38/1705	245/16374	0.00803537	0.103558	0.091466	VAPA/SLC44A2/MTDH/NDFIP1/GPRC5B/DDX21/HACD3/UBE2N/TNFRSF1A/FLNA/SQSTM1/AZI2/CPNE1/MIB2/AKT1/RHOA/TRIM8/CXXC5/REL/ZNF675/HMOX1/LITAF/TERF2IP/SHISA5/NFKBIA/GSTP1/GJA1/TMEM9B/RELA/S100B/OPTN/IRAK1/UBC/PINK1/HSPB1/LGALS1/UBB/PRKCB	38
GO:0000413	protein peptidyl-prolyl isomerization	9/1705	35/16374	0.00811833	0.104096	0.0919413	PPIG/RANBP2/FKBP3/PTPA/PPIB/PPIA/FKBP2/PIN1/FKBP8	9
GO:0001893	maternal placenta development	9/1705	35/16374	0.00811833	0.104096	0.0919413	MAPK1/SPP1/AKT1/TMED2/NR2F2/BSG/GJA1/CTSB/JUNB	9
GO:0007613	memory	15/1705	74/16374	0.00847744	0.108425	0.0957651	PPP3CB/MAPT/LGMN/SORCS3/CIC/FGF13/CEBPB/CNR1/FAM19A2/S100B/GRIN2A/PAK5/SYT4/SLC24A2/MAP1A	15
GO:0060071	Wnt signaling pathway, planar cell polarity pathway	19/1705	102/16374	0.00852148	0.108713	0.0960195	CLTC/PSMC6/FZD3/CDC42/PSMB1/RHOA/PSMD3/PSMD7/PSMB4/PSMD8/PSMD2/PSMB5/PSMA7/PSMA4/RAC1/PSMB3/DVL1/AP2M1/AP2S1	19
GO:0019079	viral genome replication	16/1705	81/16374	0.00861457	0.109349	0.0965807	ILF3/LARP1/DDB1/HACD3/PABPC1/DDX3X/DDX5/CTBP1/PPIA/PDE12/BANF1/IFITM3/GRK2/GAS6/LAMTOR5/ISG15	16
GO:0031145	anaphase-promoting complex-dependent catabolic process	16/1705	81/16374	0.00861457	0.109349	0.0965807	ANAPC5/PSMC6/PSMB1/PSMD3/PSMD7/PSMB4/PSMD8/PSMD2/PSMB5/PSMA7/PSMA4/PSMB3/ANAPC11/FZR1/UBC/UBB	16
GO:0015031	protein transport	58/1705	408/16374	0.00877031	0.110489	0.0975874	KIF5B/NDFIP1/MIA3/ACSL3/SNX3/PGAP1/SNAP91/EZR/KIF3A/RRBP1/ARF1/ARFGAP1/VPS51/SEC22C/SFT2D2/SCAMP1/PCNT/RACK1/PTPN23/MLC1/BTF3/ERP29/CHMP5/SCAMP2/PHAX/STXBP1/ANKRD50/PPT1/VPS28/HMGCR/GDI1/OAZ2/YKT6/SNX10/PPIA/MVP/APOE/ATP13A2/CD63/CHP1/MYO1D/APBB1/BICD2/CSK/FRAS1/LMAN2/FRMD4A/B3GAT3/GABARAPL2/COPE/DNAJA1/SYT4/ARL8A/HSPA8/TENM1/HSP90B1/STXBP5L/SRCIN1	58
GO:0072331	signal transduction by p53 class mediator	28/1705	169/16374	0.00890442	0.110489	0.0975874	CSNK2A1/PTTG1IP/SUPT16H/DDX5/CDK5RAP3/HDAC2/MEAF6/TAF7/AKT1/PRKAB2/NOC2L/HIPK1/PPP1R13B/KMT5A/EHMT2/RPL5/CHD4/NOP53/STK11/TAF13/SSRP1/RPL23/PIN1/RPL11/RPS7/CHD3/MBD3/UBB	28
GO:0051965	positive regulation of synapse assembly	13/1705	61/16374	0.00901891	0.110489	0.0975874	UBE2V2/NLGN2/NTRK2/LRRC4B/SLITRK2/ADGRL1/ADGRB2/LRRN3/LINGO2/ADGRB1/IL1RAPL1/ASIC2/PTPRD	13
GO:0006979	response to oxidative stress	21/1705	117/16374	0.00903061	0.110489	0.0975874	SLC23A2/SCARA3/MT-CO1/STK25/PSIP1/SESN3/APP/OXR1/AKT1/NDUFS2/NDUFB4/HMOX1/PSMB5/NDUFA12/NDUFS8/RPS3/MT-ND3/GPX4/PINK1/PRNP/SELENOK	21
GO:0070671	response to interleukin-12	11/1705	48/16374	0.00906025	0.110489	0.0975874	HNRNPA2B1/ARF1/CDC42/HNRNPDL/P4HB/SNRPA1/TCP1/TALDO1/PPIA/SOD1/RPLP0	11
GO:0043044	ATP-dependent chromatin remodeling	7/1705	24/16374	0.00921849	0.110489	0.0975874	CHD8/SMARCA5/HDAC2/CHD4/ACTB/CHD3/MBD3	7
GO:0048285	organelle fission	7/1705	24/16374	0.00921849	0.110489	0.0975874	MAPT/SLC25A46/VPS35/BNIP3/INF2/PINK1/FIS1	7
GO:0072657	protein localization to membrane	20/1705	110/16374	0.00926217	0.110489	0.0975874	KIF5B/CLTC/AP3D1/EZR/PRKCI/SPTBN1/SQSTM1/TMEM59/AKT1/DPP10/GSN/ABHD17A/TMBIM1/STX3/AP2M1/CPE/ACTB/CLIP3/ANK3/CD81	20
GO:0033209	tumor necrosis factor-mediated signaling pathway	27/1705	162/16374	0.00933112	0.110489	0.0975874	PSMC6/TNFRSF1A/PSMB1/CPNE1/RACK1/HIPK1/PSMD3/PSMD7/ZNF675/PSMB4/PSMD8/PSMD2/PSMB5/CDIP1/PSMA7/PSMA4/MADD/NFKBIA/GSTP1/BAG4/PSMB3/RELA/HSPA1B/GAS6/CLIP3/HSPA1A/TMSB4X	27
GO:0006002	fructose 6-phosphate metabolic process	3/1705	5/16374	0.00958774	0.110489	0.0975874	NFE2L1/TALDO1/PFKL	3
GO:0021636	trigeminal nerve morphogenesis	3/1705	5/16374	0.00958774	0.110489	0.0975874	NRP1/PLXNA3/PLXNA4	3
GO:0021637	trigeminal nerve structural organization	3/1705	5/16374	0.00958774	0.110489	0.0975874	NRP1/PLXNA3/PLXNA4	3
GO:0030497	fatty acid elongation	3/1705	5/16374	0.00958774	0.110489	0.0975874	HACD3/HACD2/TECR	3
GO:0032388	positive regulation of intracellular transport	3/1705	5/16374	0.00958774	0.110489	0.0975874	DYNC1H1/NUMA1/MLC1	3
GO:0032649	regulation of interferon-gamma production	3/1705	5/16374	0.00958774	0.110489	0.0975874	CD47/SIRPA/ISG15	3
GO:0034497	protein localization to phagophore assembly site	3/1705	5/16374	0.00958774	0.110489	0.0975874	WIPI2/PACS2/MFN2	3
GO:0035308	negative regulation of protein dephosphorylation	3/1705	5/16374	0.00958774	0.110489	0.0975874	PTPA/YWHAB/PPP1R15A	3
GO:0045040	protein insertion into mitochondrial outer membrane	3/1705	5/16374	0.00958774	0.110489	0.0975874	HSPA4/HSP90AA1/PDCD5	3
GO:0045541	negative regulation of cholesterol biosynthetic process	3/1705	5/16374	0.00958774	0.110489	0.0975874	ERLIN2/APOE/SOD1	3
GO:0051343	positive regulation of cyclic-nucleotide phosphodiesterase activity	3/1705	5/16374	0.00958774	0.110489	0.0975874	RACK1/CALM3/CALM1	3
GO:0051495	positive regulation of cytoskeleton organization	3/1705	5/16374	0.00958774	0.110489	0.0975874	PLXNA3/P2RX7/PFDN2	3
GO:0051702	interaction with symbiont	3/1705	5/16374	0.00958774	0.110489	0.0975874	DDB1/HSPD1/SMC3	3
GO:0070934	CRD-mediated mRNA stabilization	3/1705	5/16374	0.00958774	0.110489	0.0975874	HNRNPU/SYNCRIP/YBX1	3
GO:0071359	cellular response to dsRNA	3/1705	5/16374	0.00958774	0.110489	0.0975874	NPM1/P2RX7/PDE12	3
GO:0071569	protein ufmylation	3/1705	5/16374	0.00958774	0.110489	0.0975874	UFM1/CDK5RAP3/UFC1	3
GO:0072698	protein localization to microtubule cytoskeleton	3/1705	5/16374	0.00958774	0.110489	0.0975874	ABHD17B/ABHD17A/MAP1A	3
GO:0075525	viral translational termination-reinitiation	3/1705	5/16374	0.00958774	0.110489	0.0975874	EIF3A/EIF3L/EIF3G	3
GO:0090666	scaRNA localization to Cajal body	3/1705	5/16374	0.00958774	0.110489	0.0975874	CCT4/CCT2/TCP1	3
GO:1902083	negative regulation of peptidyl-cysteine S-nitrosylation	3/1705	5/16374	0.00958774	0.110489	0.0975874	NCOA7/OXR1/SNTA1	3
GO:1902474	positive regulation of protein localization to synapse	3/1705	5/16374	0.00958774	0.110489	0.0975874	MAPT/NLGN2/CLSTN3	3
GO:1902817	negative regulation of protein localization to microtubule	3/1705	5/16374	0.00958774	0.110489	0.0975874	ABHD17B/ABHD17A/MAP1A	3
GO:1903298	negative regulation of hypoxia-induced intrinsic apoptotic signaling pathway	3/1705	5/16374	0.00958774	0.110489	0.0975874	ENO1/TMBIM6/PINK1	3
GO:1905907	negative regulation of amyloid fibril formation	3/1705	5/16374	0.00958774	0.110489	0.0975874	CLU/CRYAB/APOE	3
GO:1990592	protein K69-linked ufmylation	3/1705	5/16374	0.00958774	0.110489	0.0975874	UFM1/DDRGK1/UFC1	3
GO:0030007	cellular potassium ion homeostasis	4/1705	9/16374	0.00960105	0.110489	0.0975874	ATP1A2/ATP1B1/ATP1B2/ATP1A1	4
GO:0043653	mitochondrial fragmentation involved in apoptotic process	4/1705	9/16374	0.00960105	0.110489	0.0975874	VPS35/BNIP3/BAX/FIS1	4
GO:0051668	localization within membrane	4/1705	9/16374	0.00960105	0.110489	0.0975874	GSN/RAC1/INSIG1/CD81	4
GO:0051896	regulation of protein kinase B signaling	4/1705	9/16374	0.00960105	0.110489	0.0975874	INPP5F/SESN3/RNF41/STK11	4
GO:1902946	protein localization to early endosome	4/1705	9/16374	0.00960105	0.110489	0.0975874	EZR/NRP1/SORL1/MGAT3	4
GO:1903206	negative regulation of hydrogen peroxide-induced cell death	4/1705	9/16374	0.00960105	0.110489	0.0975874	TXN/PARK7/GPR37L1/PSAP	4
GO:1904667	negative regulation of ubiquitin protein ligase activity	4/1705	9/16374	0.00960105	0.110489	0.0975874	RPL5/RPL23/RPL11/RPS7	4
GO:0060997	dendritic spine morphogenesis	12/1705	55/16374	0.00982713	0.112833	0.0996584	ABI2/BAIAP2/CAPRIN1/ACTR2/CDC42/DLG4/LRP8/EPHA4/DVL1/PAK3/CAMK2B/SRCIN1	12
GO:0048870	cell motility	60/1705	427/16374	0.00988724	0.113266	0.100041	KIF2A/MAPK1/MIA3/LMNA/TPM1/DPYSL3/CRK/NISCH/INPP5F/F3/ITGA6/CPNE3/SLK/DAG1/FLNA/TCAF1/DDRGK1/SDCBP/RACK1/SEPT7/PKN1/DLC1/PAK1/AKT1/RHOA/LMO4/SSX2IP/SEMA4D/GNAI2/SLIT2/CSF1/RNF41/ELP6/RAC1/RAP2A/DUSP3/ATP8A1/ADAM15/IER2/ITGB4/SPOCK2/PTPRT/CADM4/LDB2/MGAT3/ELMO1/PIN1/SUN2/CFAP20/FAM107A/BEX4/GRN/HSPA5/ACTB/PHPT1/NRG1/SGK1/UNC5C/SHTN1/SRCIN1	60
GO:0038095	Fc-epsilon receptor signaling pathway	20/1705	111/16374	0.0102234	0.116852	0.103208	MAPK1/PPP3CB/PSMC6/GRB2/PSMB1/PAK1/JUN/PSMD3/PSMD7/PSMB4/PSMD8/PSMD2/PSMB5/SKP1/PSMA7/PSMA4/RAC1/PSMB3/RELA/CALM1	20
GO:0051186	cofactor metabolic process	6/1705	19/16374	0.0103849	0.11737	0.103665	HSP90AA1/AKT1/PPT1/RAC1/PINK1/CALM1	6
GO:0098656	anion transmembrane transport	6/1705	19/16374	0.0103849	0.11737	0.103665	SLC4A8/SLC4A10/VDAC1/LRRC8B/VDAC2/LRRC8A	6
GO:0099175	regulation of postsynapse organization	6/1705	19/16374	0.0103849	0.11737	0.103665	EGLN1/CDKL5/ABHD17A/HSPA8/IL1RAPL1/EPHA7	6
GO:0099622	cardiac muscle cell membrane repolarization	6/1705	19/16374	0.0103849	0.11737	0.103665	AKAP9/WDR1/FLNA/CACNA2D1/SNTA1/GJA1	6
GO:0140238	presynaptic endocytosis	6/1705	19/16374	0.0103849	0.11737	0.103665	PPP3CB/SYNJ1/DNM1/DNAJC6/SYT11/CALM3	6
GO:0031146	SCF-dependent proteasomal ubiquitin-dependent protein catabolic process	14/1705	69/16374	0.0106789	0.119911	0.105909	PSMC6/PSMB1/RBX1/PSMD3/PSMD7/PSMB4/PSMD8/PSMD2/PSMB5/SKP1/PSMA7/PSMA4/FBXW5/PSMB3	14
GO:0097190	apoptotic signaling pathway	35/1705	226/16374	0.010878	0.119911	0.105909	CSNK2A1/BCLAF1/LMNA/DDX3X/TNFRSF1A/DDIT3/ITGA6/NRP1/PDIA3/RACK1/PARK7/IVNS1ABP/JUN/VDAC2/NOC2L/CLU/GNAI2/HERPUD1/P2RX7/MADD/TMBIM6/GSTP1/MEIS3/BNIP3/NDUFS3/BAX/RELA/RPS3/BCAP31/NUPR1/FASTK/PAK5/SCG2/PINK1/FIS1	35
GO:0009152	purine ribonucleotide biosynthetic process	5/1705	14/16374	0.0108973	0.119911	0.105909	ENO1/MT-CO2/PARP1/PINK1/TMSB4X	5
GO:0009206	purine ribonucleoside triphosphate biosynthetic process	5/1705	14/16374	0.0108973	0.119911	0.105909	ENO1/MT-CO2/PARP1/PINK1/TMSB4X	5
GO:0010248	establishment or maintenance of transmembrane electrochemical gradient	5/1705	14/16374	0.0108973	0.119911	0.105909	ATP1A2/ATP1B1/ATP1B2/BAX/ATP1A1	5
GO:0010821	regulation of mitochondrion organization	5/1705	14/16374	0.0108973	0.119911	0.105909	VPS35/SQSTM1/ATP13A2/PINK1/FIS1	5
GO:0032228	regulation of synaptic transmission, GABAergic	5/1705	14/16374	0.0108973	0.119911	0.105909	NISCH/KRAS/PLCL1/CNR1/SYN3	5
GO:0032469	endoplasmic reticulum calcium ion homeostasis	5/1705	14/16374	0.0108973	0.119911	0.105909	TMCO1/ATP2A2/HERPUD1/TMBIM6/BAX	5
GO:0032516	positive regulation of phosphoprotein phosphatase activity	5/1705	14/16374	0.0108973	0.119911	0.105909	PTPA/HSP90AB1/PPP1R15A/CALM3/CALM1	5
GO:0050765	negative regulation of phagocytosis	5/1705	14/16374	0.0108973	0.119911	0.105909	SNX3/RACK1/SIRPA/SYT11/CSK	5
GO:0071625	vocalization behavior	5/1705	14/16374	0.0108973	0.119911	0.105909	DLG4/CNTNAP2/BRINP1/NRXN2/SHANK2	5
GO:1902284	neuron projection extension involved in neuron projection guidance	5/1705	14/16374	0.0108973	0.119911	0.105909	NRP1/MEGF8/PLXNA3/DSCAM/PLXNA4	5
GO:0044770	cell cycle phase transition	21/1705	119/16374	0.0109182	0.119911	0.105909	DDB1/ANAPC5/PSMC6/NPM1/ZFP36L1/DDRGK1/PSMB1/ZFP36L2/PSMD3/PSMD7/PSMB4/PSMD8/PSMD2/PSMB5/SKP1/PSMA7/PSMA4/PHB2/PSMB3/ANAPC11/FZR1	21
GO:0050852	T cell receptor signaling pathway	28/1705	172/16374	0.0112323	0.123092	0.108719	MAPK1/WNK1/PSMC6/UBE2N/EZR/PSMB1/PDE4D/CRKL/PAK1/PSMD3/PSMD7/PSMB4/PSMD8/PSMD2/PSMB5/SKP1/PSMA7/PSMA4/STK11/DUSP3/CSK/PSMB3/RELA/RPS3/PAK3/PHPT1/PRNP/CD81	28
GO:0006887	exocytosis	20/1705	112/16374	0.0112629	0.123161	0.10878	MIA3/SCRN1/RAB21/DNAJC5/NCS1/SDCBP/PAK1/STXBP6/BRSK2/RAPGEF4/VAMP3/ATP13A2/SYT1/ARHGAP44/SCAMP5/IL1RAPL1/RIMS2/STXBP5L/ATP6AP1/SRCIN1	20
GO:0042771	intrinsic apoptotic signaling pathway in response to DNA damage by p53 class mediator	10/1705	43/16374	0.0113127	0.123172	0.10879	HNRNPK/HIPK1/TOPORS/CDIP1/SHISA5/BAG6/NUPR1/PHLDA3/DDIT4/RPL26	10
GO:0071364	cellular response to epidermal growth factor stimulus	10/1705	43/16374	0.0113127	0.123172	0.10879	PTPN11/BAIAP2/ZFP36L1/AKT1/ZFP36L2/DUSP3/GSTP1/NCL/BAG4/SOX9	10
GO:0030010	establishment of cell polarity	12/1705	56/16374	0.0113532	0.123347	0.108945	CRK/HSP90AA1/RACK1/CRKL/PAK1/FEZ1/BRSK2/BRSK1/RNF41/STK11/HSP90AB1/SHTN1	12
GO:0044344	cellular response to fibroblast growth factor stimulus	19/1705	105/16374	0.0115754	0.125492	0.110839	HNRNPH1/MAPK1/POLR2B/PTPN11/ZFP36L1/POLR2A/GRB2/FGFR2/CRKL/RAB14/ZFP36L2/HNRNPA1/NCBP2/PTBP1/FAT4/POLR2E/GTF2F1/POLR2L/FGF12	19
GO:0031116	positive regulation of microtubule polymerization	7/1705	25/16374	0.0116761	0.126042	0.111325	AKAP9/MAPT/NUMA1/PAK1/RAC1/RPS3/MAP1B	7
GO:2000463	positive regulation of excitatory postsynaptic potential	7/1705	25/16374	0.0116761	0.126042	0.111325	BAIAP2/NLGN2/DLG4/DVL1/GRIN1/RIMS1/RIMS2	7
GO:0017038	protein import	13/1705	63/16374	0.0118342	0.127205	0.112352	MAPK1/LAMP2/FLNA/PDCD5/NOLC1/DMAP1/CLU/PKIA/APOE/CHP1/TRIM28/HSPA8/RAN	13
GO:0036498	IRE1-mediated unfolded protein response	13/1705	63/16374	0.0118342	0.127205	0.112352	LMNA/ACADVL/ARFGAP1/EXTL3/SSR1/TLN1/PDIA6/ATP6V0D1/SRPRB/BAX/HDGF/TSPYL2/HSPA5	13
GO:0016239	positive regulation of macroautophagy	8/1705	31/16374	0.0120382	0.12885	0.113805	LARP1/BNIP3L/PAFAH1B2/GPSM1/HMOX1/BNIP3/PINK1/SCOC	8
GO:0018279	protein N-linked glycosylation via asparagine	8/1705	31/16374	0.0120382	0.12885	0.113805	STT3B/RPN2/DAD1/DDOST/RPN1/MGAT1/ST6GAL1/OST4	8
GO:0018105	peptidyl-serine phosphorylation	33/1705	213/16374	0.0130382	0.139258	0.122998	CSNK2A1/MAPK1/WNK1/AKAP9/CSNK1D/CLK1/HSP90AA1/INPP5F/PRKCI/APP/TXN/PDE4D/RACK1/PARK7/PAK1/AKT1/ULK1/EIF4G1/NTRK2/BRSK2/MAP3K10/TERF2IP/PLCL1/BAG4/BAX/RASSF2/CSNK1E/GRK2/HSP90AB1/GAS6/DDIT4/PINK1/TENM1	33
GO:1905037	autophagosome organization	10/1705	44/16374	0.0133092	0.141853	0.125289	WIPI2/PACS2/MFN2/ULK1/PIP4K2B/FEZ1/ATP13A2/NUPR1/KIAA1324/PINK1	10
GO:0072655	establishment of protein localization to mitochondrion	13/1705	64/16374	0.0134749	0.143248	0.126522	MAPT/HSPA4/HSP90AA1/BNIP3L/DDIT3/AKT1/MICALL2/BAG4/TOMM7/DNAJA1/PINK1/UBL5/ATP5IF1	13
GO:0050999	regulation of nitric-oxide synthase activity	6/1705	20/16374	0.0135536	0.143248	0.126522	HSP90AA1/ACVR2A/DDAH2/AKT1/NOSIP/CALM1	6
GO:0061003	positive regulation of dendritic spine morphogenesis	6/1705	20/16374	0.0135536	0.143248	0.126522	BAIAP2/CAPRIN1/ACTR2/LRP8/PAK3/CAMK2B	6
GO:0071385	cellular response to glucocorticoid stimulus	6/1705	20/16374	0.0135536	0.143248	0.126522	HNRNPU/ZFP36L1/ZFP36L2/GSTP1/MT-ND3/FAM107A	6
GO:0007411	axon guidance	28/1705	175/16374	0.0140315	0.14799	0.13071	MAPK1/PTPN11/MYCBP2/FZD3/ALCAM/CHL1/EZR/CRMP1/SPTAN1/SPTBN1/DPYSL2/NRP1/GRB2/SH3KBP1/FEZ1/DPYSL5/SLIT2/DSCAM/DAB1/PTPRO/DVL1/GPC1/EPHA5/DOK6/TUBB2B/RAP1GAP/UNC5C/SEMA3C	28
GO:0006417	regulation of translation	11/1705	51/16374	0.0143139	0.148652	0.131295	ZNF706/APP/MKNK2/MTPN/AKT1/NOLC1/RBM8A/PA2G4/RPS14/RPL10/RPL38	11
GO:0042542	response to hydrogen peroxide	11/1705	51/16374	0.0143139	0.148652	0.131295	PPP2CB/CRK/GNAO1/STK25/PPP1R15B/JUN/MT-ND5/HMOX1/SLC8A1/CRYAB/SOD1	11
GO:0072332	intrinsic apoptotic signaling pathway by p53 class mediator	11/1705	51/16374	0.0143139	0.148652	0.131295	PTTG1IP/DDX5/HNRNPK/PPP1R13B/STK11/BAX/RPL11/RPS7/HINT1/UBB/RPL26	11
GO:0070588	calcium ion transmembrane transport	21/1705	122/16374	0.0143292	0.148652	0.131295	YWHAE/NCS1/TMCO1/ATP1A2/SEC61A1/CACNA2D1/ORAI2/ATP2A2/ANXA6/SLC8A1/P2RX7/ATP2B2/ATP2B1/NALCN/CBARP/TRPM3/GAS6/CACNA1E/IL1RAPL1/CACNA1B/CACNA2D3	21
GO:0022011	myelination in peripheral nervous system	7/1705	26/16374	0.014574	0.148652	0.131295	DAG1/ADAM22/AKT1/NTRK2/SOD1/NDRG1/NRG1	7
GO:0031102	neuron projection regeneration	7/1705	26/16374	0.014574	0.148652	0.131295	RGMA/PTPRS/INPP5F/PTPRF/ULK1/EPHA4/GRN	7
GO:0045070	positive regulation of viral genome replication	7/1705	26/16374	0.014574	0.148652	0.131295	LARP1/DDB1/HACD3/PABPC1/DDX3X/PPIA/PDE12	7
GO:0051090	regulation of DNA-binding transcription factor activity	7/1705	26/16374	0.014574	0.148652	0.131295	MAPK1/CREBZF/USP7/ZBTB7A/JUN/HMOX1/SGK1	7
GO:0060074	synapse maturation	7/1705	26/16374	0.014574	0.148652	0.131295	CLSTN1/YWHAZ/PALM/ADGRL1/BCAN/SEZ6/CAMK2B	7
GO:0065008	regulation of biological quality	7/1705	26/16374	0.014574	0.148652	0.131295	DAG1/SLITRK2/CDH8/BAX/PTPRO/SPARC/TUBB	7
GO:0032148	activation of protein kinase B activity	8/1705	32/16374	0.0146216	0.148652	0.131295	CCDC88A/TXN/PARK7/AKT1/GAS6/NRG1/PINK1/MT3	8
GO:0002260	lymphocyte homeostasis	4/1705	10/16374	0.0146973	0.148652	0.131295	SKIL/AKT1/RPS6/BAX	4
GO:0006878	cellular copper ion homeostasis	4/1705	10/16374	0.0146973	0.148652	0.131295	ARF1/APP/MT2A/PRNP	4
GO:0007084	mitotic nuclear envelope reassembly	4/1705	10/16374	0.0146973	0.148652	0.131295	LMNA/PPP2R1A/EMD/BANF1	4
GO:0032488	Cdc42 protein signal transduction	4/1705	10/16374	0.0146973	0.148652	0.131295	NRP1/APOE/RIT2/SHTN1	4
GO:0036500	ATF6-mediated unfolded protein response	4/1705	10/16374	0.0146973	0.148652	0.131295	DDIT3/HSPA5/CALR/HSP90B1	4
GO:0045670	regulation of osteoclast differentiation	4/1705	10/16374	0.0146973	0.148652	0.131295	FAM213A/ESRRA/CEBPB/RASSF2	4
GO:0061635	regulation of protein complex stability	4/1705	10/16374	0.0146973	0.148652	0.131295	SQSTM1/TAPBP/HSPA8/SCOC	4
GO:0071287	cellular response to manganese ion	4/1705	10/16374	0.0146973	0.148652	0.131295	BACE1/APP/ATP13A2/HSPA5	4
GO:0071709	membrane assembly	4/1705	10/16374	0.0146973	0.148652	0.131295	SPTBN1/SYT11/NRXN2/ANK3	4
GO:0006898	receptor-mediated endocytosis	27/1705	168/16374	0.0148066	0.148652	0.131295	SCARB2/CLTC/RAB21/SNAP91/HSP90AA1/ARF1/HNRNPK/DNM1/SDCBP/SORL1/DLG4/DNAJC6/CAP1/LRPAP1/CLU/PPT1/RAC1/SYT11/APOE/CD63/WASF1/HSPH1/SPARC/PICK1/B2M/CALR/HSP90B1	27
GO:0007213	G protein-coupled acetylcholine receptor signaling pathway	5/1705	15/16374	0.0149678	0.148652	0.131295	GNB1/GNAI2/GNA11/GRK2/CHRM3	5
GO:0043254	regulation of protein-containing complex assembly	5/1705	15/16374	0.0149678	0.148652	0.131295	PTPN11/HSP90AA1/PINK1/HSPA8/GFAP	5
GO:0048268	clathrin coat assembly	5/1705	15/16374	0.0149678	0.148652	0.131295	CLTC/SNAP91/CLTA/AP2S1/CALY	5
GO:0050651	dermatan sulfate proteoglycan biosynthetic process	5/1705	15/16374	0.0149678	0.148652	0.131295	DSEL/BCAN/NCAN/B3GAT3/CSPG5	5
GO:0070262	peptidyl-serine dephosphorylation	5/1705	15/16374	0.0149678	0.148652	0.131295	PPP2CB/YWHAE/PPP1R15B/PPP2R1A/PPP1R15A	5
GO:0097107	postsynaptic density assembly	5/1705	15/16374	0.0149678	0.148652	0.131295	PTPRS/NLGN2/NRXN2/LRFN4/PTPRD	5
GO:1900153	positive regulation of nuclear-transcribed mRNA catabolic process, deadenylation-dependent decay	5/1705	15/16374	0.0149678	0.148652	0.131295	PABPC1/ZFP36L1/CPEB3/ZFP36L2/TOB1	5
GO:1903827	regulation of cellular protein localization	5/1705	15/16374	0.0149678	0.148652	0.131295	HSP90AA1/PARP1/DVL1/CSNK1E/HSP90AB1	5
GO:0090263	positive regulation of canonical Wnt signaling pathway	22/1705	130/16374	0.014977	0.148652	0.131295	WNK1/UBE2B/GPRC5B/CSNK1D/PSMC6/DDX3X/VPS35/PSMB1/FGFR2/PSMD3/PSMD7/PSMB4/PSMD8/PSMD2/PSMB5/PSMA7/PSMA4/DAAM2/SOX4/PSMB3/PIN1/RNF220	22
GO:0000288	nuclear-transcribed mRNA catabolic process, deadenylation-dependent decay	13/1705	65/16374	0.0152847	0.151408	0.133729	DDX6/PABPC1/ZFP36L1/CNOT6L/CPEB3/ZFP36L2/LSM5/LSM7/EXOSC6/PDE12/LSM3/LSM4/TOB1	13
GO:0036473	cell death in response to oxidative stress	10/1705	45/16374	0.0155586	0.15382	0.135859	LANCL1/TXN/NCOA7/PARK7/OXR1/ATF4/ARL6IP5/GPR37L1/PSAP/PINK1	10
GO:1901796	regulation of signal transduction by p53 class mediator	22/1705	131/16374	0.0162856	0.160693	0.14193	CSNK2A1/SUPT16H/HDAC2/MEAF6/TAF7/AKT1/PRKAB2/NOC2L/HIPK1/PPP1R13B/KMT5A/EHMT2/RPL5/CHD4/NOP53/STK11/TAF13/SSRP1/PIN1/RPL11/CHD3/MBD3	22
GO:0043066	negative regulation of apoptotic process	65/1705	481/16374	0.0169226	0.166196	0.14679	SON/UBE2B/MTDH/DDB1/IL6ST/KIFAP3/DDX3X/NPM1/BNIP3L/TMF1/CCND2/UFM1/HSPD1/PRKCI/ANGPTL4/HNRNPK/FLNA/HDAC2/SQSTM1/DDRGK1/FGFR2/PARK7/DDAH2/AKT1/DAD1/YWHAZ/SEMA4D/PPT1/POU3F3/TOPORS/CRYAB/EDNRB/RPS6/BAG6/TMBIM6/NFKBIA/GSTP1/BNIP3/BAG4/SOX9/PHB2/RELA/NUPR1/PA2G4/HSPA1B/ATOX1/TIMP1/GAS6/IRAK1/DNAJA1/LAMTOR5/HSPA5/UBC/PHB/RPL10/FKBP8/RPS3A/HSPB1/TPT1/UBB/HSPA1A/HSP90B1/ASIC2/MT3/ARHGDIA	65
GO:0007041	lysosomal transport	6/1705	21/16374	0.0173396	0.166196	0.14679	ARF1/VPS51/VPS35/GRN/PSAP/HSPA1A	6
GO:0031290	retinal ganglion cell axon guidance	6/1705	21/16374	0.0173396	0.166196	0.14679	ALCAM/NRP1/SLIT2/PTPRO/RPL24/EPHA7	6
GO:0050807	regulation of synapse organization	6/1705	21/16374	0.0173396	0.166196	0.14679	DAG1/SLITRK2/CDH8/PTPRO/SPARC/TUBB	6
GO:0086004	regulation of cardiac muscle cell contraction	6/1705	21/16374	0.0173396	0.166196	0.14679	AKAP9/ATP1A2/PDE4D/ATP2A2/FGF13/ATP1A1	6
GO:0097484	dendrite extension	8/1705	33/16374	0.0175849	0.166196	0.14679	STK11/WASF1/SLC9A6/SYT1/UNC13A/SYT4/RIMS1/RIMS2	8
GO:0006282	regulation of DNA repair	3/1705	6/16374	0.0176972	0.166196	0.14679	UBE2N/UBE2V2/USP1	3
GO:0006620	posttranslational protein targeting to endoplasmic reticulum membrane	3/1705	6/16374	0.0176972	0.166196	0.14679	SEC62/SEC61A1/HSPA5	3
GO:0010940	positive regulation of necrotic cell death	3/1705	6/16374	0.0176972	0.166196	0.14679	MT-CO2/BNIP3/MT3	3
GO:0015871	choline transport	3/1705	6/16374	0.0176972	0.166196	0.14679	SLC44A2/SLC44A1/SLC6A8	3
GO:0031547	brain-derived neurotrophic factor receptor signaling pathway	3/1705	6/16374	0.0176972	0.166196	0.14679	RAPGEF2/NTRK2/SLC9A6	3
GO:0035459	vesicle cargo loading	3/1705	6/16374	0.0176972	0.166196	0.14679	TMED10/TMED2/INSIG1	3
GO:0045428	regulation of nitric oxide biosynthetic process	3/1705	6/16374	0.0176972	0.166196	0.14679	CD47/SIRPA/RAC1	3
GO:0046826	negative regulation of protein export from nucleus	3/1705	6/16374	0.0176972	0.166196	0.14679	TXN/PARK7/RANGAP1	3
GO:0046931	pore complex assembly	3/1705	6/16374	0.0176972	0.166196	0.14679	CCT3/CCT8/P2RX7	3
GO:0071816	tail-anchored membrane protein insertion into ER membrane	3/1705	6/16374	0.0176972	0.166196	0.14679	SGTA/WRB/BAG6	3
GO:0072178	nephric duct morphogenesis	3/1705	6/16374	0.0176972	0.166196	0.14679	EPHA4/EFNB2/EPHA7	3
GO:0072553	terminal button organization	3/1705	6/16374	0.0176972	0.166196	0.14679	VPS35/NLGN2/CHD4	3
GO:1900121	negative regulation of receptor binding	3/1705	6/16374	0.0176972	0.166196	0.14679	PTPRF/ADAM15/B2M	3
GO:1901018	positive regulation of potassium ion transmembrane transporter activity	3/1705	6/16374	0.0176972	0.166196	0.14679	AKAP9/ATP1B1/ATP1B2	3
GO:1902047	polyamine transmembrane transport	3/1705	6/16374	0.0176972	0.166196	0.14679	AZIN1/OAZ2/ATP13A2	3
GO:1902231	positive regulation of intrinsic apoptotic signaling pathway in response to DNA damage	3/1705	6/16374	0.0176972	0.166196	0.14679	NACC2/SKIL/RPS3	3
GO:1902949	positive regulation of tau-protein kinase activity	3/1705	6/16374	0.0176972	0.166196	0.14679	HSP90AA1/CLU/HSP90AB1	3
GO:1903038	negative regulation of leukocyte cell-cell adhesion	3/1705	6/16374	0.0176972	0.166196	0.14679	WNK1/MIA3/AKT1	3
GO:1903393	positive regulation of adherens junction organization	3/1705	6/16374	0.0176972	0.166196	0.14679	MAPRE2/IQSEC1/PTPN23	3
GO:0043065	positive regulation of apoptotic process	45/1705	315/16374	0.0176986	0.166196	0.14679	BCLAF1/RNPS1/DDX3X/BNIP3L/CSRNP3/HSPD1/ITGA6/SQSTM1/PDCD5/RACK1/SEPT7/JUN/AKT1/MTCH1/PTPA/ATF4/CLU/HMOX1/SLIT2/SAP18/PNMA2/ARL6IP5/RPS6/BNIP3/APBB1/BAX/SOX4/CNR1/RASSF2/S100B/GRIN2A/SOD1/PHLDA3/DNAJA1/ID3/GRIN1/UBC/EEF1A2/PNMA1/GADD45B/UNC5C/CLIP3/UBB/OLFM1/RASGRF2	45
GO:0050690	regulation of defense response to virus by virus	7/1705	27/16374	0.0179499	0.168243	0.148598	ARF1/AP1B1/RAC1/ELMO1/AP2M1/AP2S1/B2M	7
GO:0030218	erythrocyte differentiation	17/1705	95/16374	0.018119	0.168888	0.149168	ARID4A/ZFP36L1/NFE2L1/ACVR2A/KLF13/P4HTM/RPS6/JMJD6/PRMT1/ID2/HSPA1B/B2M/RPS14/ISG15/HSPA1A/THRA/ATP5IF1	17
GO:0097711	ciliary basal body-plasma membrane docking	17/1705	95/16374	0.018119	0.168888	0.149168	AKAP9/CSNK1D/YWHAE/DYNC1H1/HSP90AA1/DYNC1I2/PCNT/CCP110/PPP2R1A/ACTR1A/DYNLL1/PRKAR2B/CSNK1E/YWHAG/DCTN3/TUBB/TUBB4B	17
GO:1990778	protein localization to cell periphery	17/1705	95/16374	0.018119	0.168888	0.149168	KIF5B/CLTC/EZR/NUMA1/PRKCI/SPTBN1/SQSTM1/TMEM59/AKT1/DPP10/TMBIM1/STX3/AP2M1/GNAI1/ACTB/CLIP3/ANK3	17
GO:0072593	reactive oxygen species metabolic process	21/1705	125/16374	0.0185322	0.172421	0.152289	NDUFS1/GRB2/SELENOS/MT-ND2/PARK7/VDAC1/RHOA/P2RX7/PDK4/RNF41/CRYAB/RAC1/BNIP3/NDUFS3/SOD1/GRIN1/DDIT4/ADGRB1/PINK1/ATP5IF1/MT3	21
GO:0006936	muscle contraction	24/1705	148/16374	0.0187118	0.173772	0.153482	TPM1/GNAO1/NDUFS6/ATP1A2/TPM4/ENO1/TLN1/PABPN1/TPM3/SNTA1/SLC6A8/SLC8A1/EMD/CRYAB/MYL6B/GJA1/MYL12B/HSBP1/VIM/GRK2/ATP1A1/MYL6/CALM1/KCNB2	24
GO:0044257	cellular protein catabolic process	12/1705	60/16374	0.0193393	0.178942	0.158048	HSP90AA1/PTTG1IP/EZR/VPS35/CDK5RAP3/CLPX/CTSL/LGMN/PPT1/APOE/CTSB/CD81	12
GO:0051225	spindle assembly	12/1705	60/16374	0.0193393	0.178942	0.158048	HNRNPU/CSNK1D/DYNC1H1/NUMA1/SMC3/CHMP5/CHMP1A/RPS3/HSPA1B/TUBB/CCSAP/HSPA1A	12
GO:0000245	spliceosomal complex assembly	9/1705	40/16374	0.0196143	0.180495	0.159419	SNRNP200/SF3B1/TXNL4A/SNRPD1/SNRPE/SNRPG/SRSF9/SNRPD2/PRPF19	9
GO:0006687	glycosphingolipid metabolic process	9/1705	40/16374	0.0196143	0.180495	0.159419	ESYT2/CTSA/UGCG/GLTP/ASAH1/B3GALNT1/BAX/NEU1/PSAP	9
GO:0035735	intraciliary transport involved in cilium assembly	9/1705	40/16374	0.0196143	0.180495	0.159419	KIFAP3/KIF3A/KIF3B/IFT57/DYNLRB1/SSX2IP/DYNLL1/KIF3C/DYNLL2	9
GO:0006820	anion transport	5/1705	16/16374	0.0199416	0.181522	0.160327	VDAC1/VDAC2/LRRC8A/RAB11B/CA2	5
GO:0021700	developmental maturation	5/1705	16/16374	0.0199416	0.181522	0.160327	CLSTN1/YWHAZ/ADGRL1/MAP1B/CAMK2B	5
GO:0050770	regulation of axonogenesis	5/1705	16/16374	0.0199416	0.181522	0.160327	CHN1/BRSK2/BRSK1/EPHA4/GRIN1	5
GO:0086065	cell communication involved in cardiac conduction	5/1705	16/16374	0.0199416	0.181522	0.160327	CTNNA3/PDE4D/CALM3/CALM1/CXADR	5
GO:0097091	synaptic vesicle clustering	5/1705	16/16374	0.0199416	0.181522	0.160327	PCDH17/NLGN2/BRSK2/BRSK1/SYN3	5
GO:0098698	postsynaptic specialization assembly	5/1705	16/16374	0.0199416	0.181522	0.160327	PTPRS/NLGN2/NRXN2/LRFN4/PTPRD	5
GO:0016055	Wnt signaling pathway	56/1705	410/16374	0.0208477	0.1871	0.165253	CSNK2A1/CHD8/WNK1/UBE2B/GPRC5B/DDB1/CSNK1D/TLE4/SNX3/PSMC6/DDX3X/RTF1/DDIT3/VPS35/APP/NDRG2/PSMB1/FGFR2/RBX1/RACK1/CALCOCO1/PSMD3/PSMD7/MESD/PSMB4/PSMD8/PPP2R1A/PSMD2/PSMB5/SKP1/TMEM170B/EMD/PFDN5/APC2/PSMA7/PSMA4/DAAM2/STK11/APOE/RUVBL2/SOX9/SOX4/PSMB3/PTPRO/DVL1/HECW1/CSNK1E/PIN1/CPE/RNF220/ATP6AP2/UBC/DKK3/AES/AMER2/UBB	56
GO:0016050	vesicle organization	10/1705	47/16374	0.0208861	0.1871	0.165253	KIF5B/SCARB2/FNBP1L/SORT1/SYNJ1/SDCBP/TMEM175/STXBP1/VAMP3/SYT4	10
GO:0034383	low-density lipoprotein particle clearance	8/1705	34/16374	0.0209555	0.1871	0.165253	CLTC/CLTA/HNRNPK/HMOX1/KHSRP/CSK/AP2M1/AP2S1	8
GO:0042987	amyloid precursor protein catabolic process	8/1705	34/16374	0.0209555	0.1871	0.165253	TMED10/APP/SORL1/CLU/APOE/UNC13A/EPHA4/PRNP	8
GO:0048588	developmental cell growth	8/1705	34/16374	0.0209555	0.1871	0.165253	PTPRS/ULK2/YY1/PAK1/SEMA4D/FGF13/PIN1/EPHA7	8
GO:0033138	positive regulation of peptidyl-serine phosphorylation	15/1705	82/16374	0.0211366	0.1871	0.165253	AKAP9/HSP90AA1/APP/TXN/PARK7/PAK1/AKT1/EIF4G1/NTRK2/TERF2IP/BAG4/HSP90AB1/GAS6/PINK1/TENM1	15
GO:0044706	multi-multicellular organism process	15/1705	82/16374	0.0211366	0.1871	0.165253	SPP1/ACSL4/DDR1/IGFBP7/ACVR2A/FKBP4/H3F3B/TRO/BSG/CNR1/SOD1/RPL29/TRIM28/CST3/JUNB	15
GO:0006900	vesicle budding from membrane	4/1705	11/16374	0.0212209	0.1871	0.165253	FNBP1L/P2RX7/S100A10/AP2M1	4
GO:0035457	cellular response to interferon-alpha	4/1705	11/16374	0.0212209	0.1871	0.165253	TROVE2/IFNAR1/PDE12/GAS6	4
GO:0045116	protein neddylation	4/1705	11/16374	0.0212209	0.1871	0.165253	RBX1/RPL5/UBE2M/RPL11	4
GO:0045667	regulation of osteoblast differentiation	4/1705	11/16374	0.0212209	0.1871	0.165253	DDX5/FGFR2/ESRRA/RASSF2	4
GO:0045956	positive regulation of calcium ion-dependent exocytosis	4/1705	11/16374	0.0212209	0.1871	0.165253	ARF1/STXBP1/SCAMP5/SYT4	4
GO:0048172	regulation of short-term neuronal synaptic plasticity	4/1705	11/16374	0.0212209	0.1871	0.165253	SLC4A10/SHISA9/SYNGR1/UNC13A	4
GO:0048681	negative regulation of axon regeneration	4/1705	11/16374	0.0212209	0.1871	0.165253	RGMA/PTPRS/INPP5F/EPHA4	4
GO:0051561	positive regulation of mitochondrial calcium ion concentration	4/1705	11/16374	0.0212209	0.1871	0.165253	BNIP3/SLC25A23/BCAP31/FIS1	4
GO:0086013	membrane repolarization during cardiac muscle cell action potential	4/1705	11/16374	0.0212209	0.1871	0.165253	YWHAE/FLNA/ATP1B1/ATP1A1	4
GO:1901222	regulation of NIK/NF-kappaB signaling	4/1705	11/16374	0.0212209	0.1871	0.165253	NFKBIA/RELA/PRDX1/TMSB4X	4
GO:2001171	positive regulation of ATP biosynthetic process	4/1705	11/16374	0.0212209	0.1871	0.165253	ENO1/MT-CO2/PINK1/TMSB4X	4
GO:0001666	response to hypoxia	34/1705	229/16374	0.0214977	0.18921	0.167117	PSMC6/ANGPTL4/PSMB1/RBX1/PAK1/MT-CYB/EGLN1/ELOC/RHOA/ALKBH5/MT-ND5/PSMD3/PSMD7/MT-ND4/PKM/PSMB4/PSMD8/PSMD2/PSMB5/ATP1B1/PSMA7/CRYAB/PSMA4/BNIP3/AGTRAP/PSMB3/CHCHD2/CST3/DDIT4/UBC/ELOB/UBB/HSP90B1/MT3	34
GO:0048668	collateral sprouting	6/1705	22/16374	0.0217925	0.189487	0.167362	PTPRS/ULK2/SEMA4D/FGF13/DVL1/EPHA7	6
GO:1900273	positive regulation of long-term synaptic potentiation	6/1705	22/16374	0.0217925	0.189487	0.167362	NPTN/APP/SQSTM1/LGMN/GRIN2A/ADCY1	6
GO:1901223	negative regulation of NIK/NF-kappaB signaling	6/1705	22/16374	0.0217925	0.189487	0.167362	CPNE1/LITAF/ADIPOR1/RELA/RASSF2/TMSB4X	6
GO:0043433	negative regulation of DNA-binding transcription factor activity	13/1705	68/16374	0.0218322	0.189487	0.167362	DDIT3/FLNA/HDAC2/EGLN1/MAP3K10/HMOX1/PHB2/KEAP1/ID2/NUPR1/GAS6/ID3/PRNP	13
GO:0001937	negative regulation of endothelial cell proliferation	7/1705	28/16374	0.0218396	0.189487	0.167362	ATP5F1A/NR2F2/APOE/GJA1/SPARC/SCG2/ATP5IF1	7
GO:0001964	startle response	7/1705	28/16374	0.0218396	0.189487	0.167362	CHD8/BACE1/GLRB/DVL1/GRIN2A/GRIN1/CSMD1	7
GO:0034205	amyloid-beta formation	7/1705	28/16374	0.0218396	0.189487	0.167362	TMED10/APP/SORL1/CLU/APOE/EPHA4/PRNP	7
GO:0019933	cAMP-mediated signaling	12/1705	61/16374	0.0218668	0.189487	0.167362	UBE2B/RAPGEF2/PDE4D/PDE3B/RAPGEF4/SOX9/CDC34/EPHA5/PEX5L/GNAI1/ADCY1/RIMS2	12
GO:0035773	insulin secretion involved in cellular response to glucose stimulus	12/1705	61/16374	0.0218668	0.189487	0.167362	KIF5B/PPP3CB/HMGN3/SELENOT/BRSK2/HMGCR/RAC1/PTPRN2/EPHA5/RAB11B/PHPT1/ADCY5	12
GO:0006974	cellular response to DNA damage stimulus	44/1705	311/16374	0.0219176	0.189602	0.167463	MAPK1/BCLAF1/UBE2B/MAPT/CBX5/DDB1/RBBP6/UBE2N/UBA1/DDIT3/ZBTB4/UBE2V2/NACC2/YY1/SKIL/GNL1/PAK1/AKT1/ALKBH5/CBX3/PHF1/MCTS1/CLU/OTUB1/CBX1/MACROD2/TOPORS/BRSK1/USP1/PRPF19/NOP53/STK11/PARP1/CTC1/FAAP20/HMCES/APBB1/RPS3/ATMIN/FEM1B/TRIM28/PPP1R15A/SGK1/TPT1	44
GO:0042981	regulation of apoptotic process	25/1705	158/16374	0.0220856	0.190729	0.168458	BNIP3L/SLK/ZBTB7A/SERBP1/SARM1/AKT1/IFT57/PPP1R13B/RSL1D1/LRP8/MADD/NOP53/GJA1/SOX9/BAX/RPS3/RTN4/NDRG1/PHB/CALR/SGK1/BEX2/CTSB/TPT1/LGALS1	25
GO:0000278	mitotic cell cycle	26/1705	166/16374	0.0223721	0.192874	0.170353	HNRNPU/USP22/PTPN11/CLTC/SRSF2/SMC3/APP/CDK11B/SDCBP/AZI2/NOLC1/VCPIP1/CDC25B/TIMP2/ARPP19/LGMN/POLDIP2/TTYH1/IK/DUSP3/JTB/TADA3/ANAPC11/CIT/DCTN3/RAN	26
GO:0045892	negative regulation of transcription, DNA-templated	65/1705	488/16374	0.0224344	0.193081	0.170536	KHDRBS1/CHD8/BCLAF1/ILF3/DNAJB6/YWHAQ/CBX5/ARID4A/CEBPD/CREBZF/DEAF1/TSC22D4/DDIT3/ZNF706/EID1/ZBTB4/HDAC2/NACC2/ENO1/XRCC6/ZBTB7A/TAF7/RING1/CTBP1/JUN/BHLHE41/KMT5A/CBX3/ID4/DMAP1/ZNF318/MAP3K10/NONO/BCL7A/FOXG1/CBX1/POU3F3/CHMP1A/HDAC5/PFDN5/NACC1/CRYAB/NR2F2/CIC/RASD1/SOX9/RUNX1T1/PHB2/RELA/ID2/SET/PA2G4/GAS6/TRIM28/ID3/YWHAB/DKK3/PHB/CALR/NRG1/ZBTB18/HSPA8/AES/THRA/MT3	65
GO:0019941	modification-dependent protein catabolic process	9/1705	41/16374	0.0228789	0.196238	0.173325	CSNK2A1/SGTA/CLU/RPL5/RPL23/RNF139/RPL11/RPS7/ISG15	9
GO:0032456	endocytic recycling	9/1705	41/16374	0.0228789	0.196238	0.173325	INPP5F/VPS51/ARL4C/SORL1/PTPN23/RAB14/MICALL2/RAB11B/NDRG4	9
GO:0006626	protein targeting to mitochondrion	15/1705	83/16374	0.0233984	0.200354	0.17696	HSPA4/HSP90AA1/BNIP3L/TOMM70/MFN2/MICALL2/TOMM20/BAG4/TOMM7/SLC25A6/PINK1/UBL5/FIS1/TIMM13/ATP5IF1	15
GO:1903047	mitotic cell cycle process	38/1705	263/16374	0.0234381	0.200354	0.17696	KIF2A/KPNB1/HNRNPU/AKAP8L/DDB1/ANAPC5/PSMC6/NUMA1/ZFP36L1/KIF3B/FLNA/MAP9/NFE2L1/PSMB1/ZFP36L2/RHOA/PSMD3/PSMD7/CHMP5/PSMB4/PSMD8/PPP2R1A/PSMD2/PSMB5/SKP1/CHMP1A/PSMA7/NCAPH2/PSMA4/FBXW5/OBSL1/PSMB3/ANAPC11/FZR1/PIN1/RPL24/AURKAIP1/RAN	38
GO:0001933	negative regulation of protein phosphorylation	14/1705	76/16374	0.0239892	0.204106	0.180274	CDK5RAP3/PPP1R15B/PARK7/CRKL/SIRPA/SLIT2/CTDSP1/TERF2IP/DUSP3/CHP1/PTPRT/CADM4/FKBP8/PRNP	14
GO:0051170	import into nucleus	14/1705	76/16374	0.0239892	0.204106	0.180274	MAPK1/FLNA/SNRPD1/SNRPE/SNRPG/NOLC1/HNRNPA1/DMAP1/SNRPD2/PKIA/CHP1/SNRPB/TRIM28/RAN	14
GO:0034620	cellular response to unfolded protein	10/1705	48/16374	0.0239982	0.204106	0.180274	CREBRF/CDK5RAP3/SELENOS/DERL1/TMBIM6/STUB1/BAX/OPTN/HSPA5/HSPA1A	10
GO:0008637	apoptotic mitochondrial changes	11/1705	55/16374	0.0245286	0.207917	0.183639	NDUFS1/PPP2CB/LMNA/PDCD5/AKT1/CLU/CHCHD10/BNIP3/BAX/PINK1/SLC25A4	11
GO:0035914	skeletal muscle cell differentiation	11/1705	55/16374	0.0245286	0.207917	0.183639	DDX17/DDX5/MEF2D/AKIRIN1/EMD/MAFF/ATF3/S100B/GPC1/NUPR1/SOX11	11
GO:0018393	internal peptidyl-lysine acetylation	8/1705	35/16374	0.0247591	0.208819	0.184437	EID1/TAF7/CTBP1/KAT2A/NOC2L/BAG6/RUVBL2/SET	8
GO:0048488	synaptic vesicle endocytosis	8/1705	35/16374	0.0247591	0.208819	0.184437	PPP3CB/SYNJ1/DNM1/DNAJC6/CANX/SYT11/CALM3/ACTB	8
GO:2001237	negative regulation of extrinsic apoptotic signaling pathway	8/1705	35/16374	0.0247591	0.208819	0.184437	LMNA/ITGA6/NRP1/PARK7/GSTP1/RELA/PAK5/SCG2	8
GO:0002026	regulation of the force of heart contraction	5/1705	17/16374	0.0258841	0.215786	0.19059	ATP1A2/ATP2A2/SLC8A1/GAA/ATP1A1	5
GO:0010801	negative regulation of peptidyl-threonine phosphorylation	5/1705	17/16374	0.0258841	0.215786	0.19059	EIF4G1/CADM4/CALM3/DDIT4/CALM1	5
GO:0036475	neuron death in response to oxidative stress	5/1705	17/16374	0.0258841	0.215786	0.19059	LANCL1/NCOA7/OXR1/ATF4/PINK1	5
GO:0042255	ribosome assembly	5/1705	17/16374	0.0258841	0.215786	0.19059	NPM1/RPL5/NOP53/RPL11/RPS14	5
GO:0051966	regulation of synaptic transmission, glutamatergic	5/1705	17/16374	0.0258841	0.215786	0.19059	ATP1A2/SYT1/UNC13A/CNR1/HOMER1	5
GO:0060236	regulation of mitotic spindle organization	5/1705	17/16374	0.0258841	0.215786	0.19059	CLTC/DYNC1H1/NUMA1/MAP9/GNAI1	5
GO:0071397	cellular response to cholesterol	5/1705	17/16374	0.0258841	0.215786	0.19059	DAG1/HMGCS1/NFE2L1/MLC1/LRP8	5
GO:0032527	protein exit from endoplasmic reticulum	7/1705	29/16374	0.0262758	0.216511	0.19123	OS9/SORL1/TMEM30A/BRSK2/BCAP31/INSIG1/CD81	7
GO:0045931	positive regulation of mitotic cell cycle	7/1705	29/16374	0.0262758	0.216511	0.19123	USP22/PTPN11/APP/CDC25B/LGMN/POLDIP2/DUSP3	7
GO:2000310	regulation of NMDA receptor activity	7/1705	29/16374	0.0262758	0.216511	0.19123	APP/DLG4/GRIA3/CAPN1/GRIN2A/GRIN1/LRRC7	7
GO:0006094	gluconeogenesis	14/1705	77/16374	0.0266071	0.216511	0.19123	RANBP2/DDB1/FAM3C/ENO1/MDH1/SELENOS/PGP/ATF4/ARPP19/ATF3/GOT2/PGAM1/ENO2/MDH2	14
GO:0071260	cellular response to mechanical stimulus	14/1705	77/16374	0.0266071	0.216511	0.19123	MAP3K2/PTPN11/TNFRSF1A/DAG1/ATP1A2/MTPN/AKT1/SLC38A2/TMEM150C/RAC1/BNIP3/GJA1/SOX9/ATP1A1	14
GO:0009966	regulation of signal transduction	6/1705	23/16374	0.0269564	0.216511	0.19123	CRK/CNKSR2/UGCG/MTCH1/YWHAG/TSPYL2	6
GO:0033137	negative regulation of peptidyl-serine phosphorylation	6/1705	23/16374	0.0269564	0.216511	0.19123	INPP5F/PDE4D/RACK1/BAX/RASSF2/DDIT4	6
GO:0016241	regulation of macroautophagy	13/1705	70/16374	0.0272304	0.216511	0.19123	LAMTOR1/VPS35/ATP6V1B2/PRKAB2/ULK1/ATP6V1G1/RRAGC/ATP6V0D1/ATP13A2/CAPN1/LAMTOR4/LAMTOR5/ATP6V0B	13
GO:0043123	positive regulation of I-kappaB kinase/NF-kappaB signaling	26/1705	169/16374	0.0274041	0.216511	0.19123	VAPA/SLC44A2/MTDH/NDFIP1/GPRC5B/DDX21/UBE2N/TNFRSF1A/FLNA/MIB2/RHOA/TRIM8/CXXC5/REL/HMOX1/LITAF/TERF2IP/SHISA5/GJA1/TMEM9B/RELA/S100B/IRAK1/PINK1/LGALS1/PRKCB	26
GO:0051881	regulation of mitochondrial membrane potential	10/1705	49/16374	0.0274308	0.216511	0.19123	NDUFS1/SLC25A36/RACK1/PARK7/P2RX7/PARP1/BAX/SOD1/PINK1/UBB	10
GO:0060047	heart contraction	15/1705	85/16374	0.0284595	0.216511	0.19123	TPM1/DMPK/GNAO1/ATP1A2/PDE4D/ATP2A2/SLC8A1/ATP1B1/GAA/VEGFB/SOD1/GRK2/ATP1A1/THRA/CACNA1B	15
GO:0002084	protein depalmitoylation	3/1705	7/16374	0.0285965	0.216511	0.19123	PPT1/ABHD17B/ABHD17A	3
GO:0006875	cellular metal ion homeostasis	3/1705	7/16374	0.0285965	0.216511	0.19123	CALR/HSP90B1/MT3	3
GO:0007253	cytoplasmic sequestering of NF-kappaB	3/1705	7/16374	0.0285965	0.216511	0.19123	G3BP2/NFKBIA/TMSB4X	3
GO:0010324	membrane invagination	3/1705	7/16374	0.0285965	0.216511	0.19123	FNBP1L/SNX3/SYT11	3
GO:0014051	gamma-aminobutyric acid secretion	3/1705	7/16374	0.0285965	0.216511	0.19123	SLC6A1/P2RX7/SV2A	3
GO:0017014	protein nitrosylation	3/1705	7/16374	0.0285965	0.216511	0.19123	NCOA7/OXR1/SNTA1	3
GO:0018198	peptidyl-cysteine modification	3/1705	7/16374	0.0285965	0.216511	0.19123	NCOA7/OXR1/SNTA1	3
GO:0023041	neuronal signal transduction	3/1705	7/16374	0.0285965	0.216511	0.19123	MACO1/CLU/OLFM1	3
GO:0030953	astral microtubule organization	3/1705	7/16374	0.0285965	0.216511	0.19123	KPNB1/EZR/NUMA1	3
GO:0032287	peripheral nervous system myelin maintenance	3/1705	7/16374	0.0285965	0.216511	0.19123	AKT1/SOD1/NDRG1	3
GO:0032489	regulation of Cdc42 protein signal transduction	3/1705	7/16374	0.0285965	0.216511	0.19123	NRP1/APOE/RIT2	3
GO:0033210	leptin-mediated signaling pathway	3/1705	7/16374	0.0285965	0.216511	0.19123	UGCG/ADIPOR1/MT3	3
GO:0035020	regulation of Rac protein signal transduction	3/1705	7/16374	0.0285965	0.216511	0.19123	CRK/SSX2IP/CADM4	3
GO:0035385	Roundabout signaling pathway	3/1705	7/16374	0.0285965	0.216511	0.19123	MYO9B/RHOA/SLIT2	3
GO:0036295	cellular response to increased oxygen levels	3/1705	7/16374	0.0285965	0.216511	0.19123	ATP6V1G1/ATP6V0D1/ATP6AP1	3
GO:0036480	neuron intrinsic apoptotic signaling pathway in response to oxidative stress	3/1705	7/16374	0.0285965	0.216511	0.19123	PARK7/NONO/PARP1	3
GO:0038026	reelin-mediated signaling pathway	3/1705	7/16374	0.0285965	0.216511	0.19123	CRK/CRKL/LRP8	3
GO:0043620	regulation of DNA-templated transcription in response to stress	3/1705	7/16374	0.0285965	0.216511	0.19123	BCLAF1/DDIT3/RELA	3
GO:0044085	cellular component biogenesis	3/1705	7/16374	0.0285965	0.216511	0.19123	SPTBN1/LDB2/ANK3	3
GO:0048278	vesicle docking	3/1705	7/16374	0.0285965	0.216511	0.19123	STXBP1/SYT1/NDRG4	3
GO:0048842	positive regulation of axon extension involved in axon guidance	3/1705	7/16374	0.0285965	0.216511	0.19123	NRP1/MEGF8/DSCAM	3
GO:0060020	Bergmann glial cell differentiation	3/1705	7/16374	0.0285965	0.216511	0.19123	MAPK1/PTPN11/VIM	3
GO:0072176	nephric duct development	3/1705	7/16374	0.0285965	0.216511	0.19123	EPHA4/EFNB2/EPHA7	3
GO:0097151	positive regulation of inhibitory postsynaptic potential	3/1705	7/16374	0.0285965	0.216511	0.19123	NLGN2/RIMS1/RIMS2	3
GO:0150093	amyloid-beta clearance by transcytosis	3/1705	7/16374	0.0285965	0.216511	0.19123	CLTC/LRPAP1/RAB11B	3
GO:1903071	positive regulation of ER-associated ubiquitin-dependent protein catabolic process	3/1705	7/16374	0.0285965	0.216511	0.19123	SGTA/HERPUD1/BCAP31	3
GO:1903608	protein localization to cytoplasmic stress granule	3/1705	7/16374	0.0285965	0.216511	0.19123	DDX3X/SSB/YBX1	3
GO:1903829	positive regulation of cellular protein localization	3/1705	7/16374	0.0285965	0.216511	0.19123	MAPT/NPTN/MAP1A	3
GO:1990048	anterograde neuronal dense core vesicle transport	3/1705	7/16374	0.0285965	0.216511	0.19123	KIF5B/KIF1C/KIF1A	3
GO:0007157	heterophilic cell-cell adhesion via plasma membrane cell adhesion molecules	8/1705	36/16374	0.0290198	0.216511	0.19123	ALCAM/CD164/ADGRL1/FAT4/IL1RAPL1/CADM3/PTPRD/CXADR	8
GO:0007339	binding of sperm to zona pellucida	8/1705	36/16374	0.0290198	0.216511	0.19123	CCT4/CCT2/CCT3/CCT5/CCT8/VDAC2/TCP1/CCT7	8
GO:0032465	regulation of cytokinesis	8/1705	36/16374	0.0290198	0.216511	0.19123	KLHL21/CCP110/KLHL9/PIN1/GIT1/CALM3/CALM1/RAB11FIP4	8
GO:1901216	positive regulation of neuron death	8/1705	36/16374	0.0290198	0.216511	0.19123	MAPT/PPP1R13B/AIMP2/CLU/PARP1/EFNB2/DDIT4/PRNP	8
GO:0060271	cilium assembly	41/1705	292/16374	0.0292132	0.216511	0.19123	AKAP9/TROVE2/CSNK1D/YWHAE/FNBP1L/KIFAP3/CCDC88A/DYNC1H1/HSP90AA1/DYNC1I2/ODF2L/ACTR2/KIF3A/KIF3B/FLNA/SEPT9/PCNT/SEPT7/CCP110/PTPN23/IFT57/CDKL5/DYNLRB1/SSX2IP/PPP2R1A/ACTR1A/DYNLL1/EVI5L/SNX10/GSN/PRKAR2B/ATP6V0D1/KIF3C/CSNK1E/ATMIN/CFAP20/YWHAG/DCTN3/DYNLL2/TUBB/TUBB4B	41
GO:0005513	detection of calcium ion	4/1705	12/16374	0.0292584	0.216511	0.19123	SYT1/KCNMB4/CALM3/CALM1	4
GO:0015867	ATP transport	4/1705	12/16374	0.0292584	0.216511	0.19123	SLC25A23/GJA1/SLC25A6/SLC25A4	4
GO:0016082	synaptic vesicle priming	4/1705	12/16374	0.0292584	0.216511	0.19123	SYNJ1/ERC2/STXBP1/SV2A	4
GO:0030208	dermatan sulfate biosynthetic process	4/1705	12/16374	0.0292584	0.216511	0.19123	DSEL/BCAN/NCAN/CSPG5	4
GO:0032688	negative regulation of interferon-beta production	4/1705	12/16374	0.0292584	0.216511	0.19123	PTPRS/YY1/REL/SIRPA	4
GO:0035641	locomotory exploration behavior	4/1705	12/16374	0.0292584	0.216511	0.19123	SLC4A10/NLGN2/DLG4/APOE	4
GO:0048024	regulation of mRNA splicing, via spliceosome	4/1705	12/16374	0.0292584	0.216511	0.19123	SON/SRSF3/KHDRBS3/JMJD6	4
GO:1902430	negative regulation of amyloid-beta formation	4/1705	12/16374	0.0292584	0.216511	0.19123	SORL1/CLU/APOE/PRNP	4
GO:1904862	inhibitory synapse assembly	4/1705	12/16374	0.0292584	0.216511	0.19123	GABRA2/NLGN2/SEMA4D/GABRB3	4
GO:0044782	cilium organization	29/1705	194/16374	0.0293396	0.216511	0.19123	AKAP9/CSNK1D/YWHAE/KIFAP3/CCDC88A/DYNC1H1/HSP90AA1/DYNC1I2/ODF2L/KIF3A/KIF3B/PCNT/CCP110/IFT57/CDKL5/DYNLRB1/SSX2IP/PPP2R1A/ACTR1A/DYNLL1/EVI5L/PRKAR2B/KIF3C/CSNK1E/YWHAG/DCTN3/DYNLL2/TUBB/TUBB4B	29
GO:0031623	receptor internalization	14/1705	78/16374	0.0294299	0.216511	0.19123	CLTC/EZR/ARF1/GRB2/SDCBP/DLG4/GRK3/LRPAP1/CD9/CD63/GRK2/PICK1/AP2M1/CD81	14
GO:0014054	positive regulation of gamma-aminobutyric acid secretion	2/1705	3/16374	0.0302566	0.216511	0.19123	SLC6A1/P2RX7	2
GO:0016476	regulation of embryonic cell shape	2/1705	3/16374	0.0302566	0.216511	0.19123	DAG1/SEPT7	2
GO:0031440	regulation of mRNA 3'-end processing	2/1705	3/16374	0.0302566	0.216511	0.19123	PAPOLA/ZFP36L1	2
GO:0033044	regulation of chromosome organization	2/1705	3/16374	0.0302566	0.216511	0.19123	MAPT/CENPV	2
GO:0033144	negative regulation of intracellular steroid hormone receptor signaling pathway	2/1705	3/16374	0.0302566	0.216511	0.19123	RHOA/CALR	2
GO:0033366	protein localization to secretory granule	2/1705	3/16374	0.0302566	0.216511	0.19123	CPE/SCG3	2
GO:0033688	regulation of osteoblast proliferation	2/1705	3/16374	0.0302566	0.216511	0.19123	FGFR2/RHOA	2
GO:0035684	helper T cell extravasation	2/1705	3/16374	0.0302566	0.216511	0.19123	CRK/CRKL	2
GO:0038189	neuropilin signaling pathway	2/1705	3/16374	0.0302566	0.216511	0.19123	CDC42/NRP1	2
GO:0042998	positive regulation of Golgi to plasma membrane protein transport	2/1705	3/16374	0.0302566	0.216511	0.19123	ACSL3/RACK1	2
GO:0045069	regulation of viral genome replication	2/1705	3/16374	0.0302566	0.216511	0.19123	DDX5/PPIA	2
GO:0045728	respiratory burst after phagocytosis	2/1705	3/16374	0.0302566	0.216511	0.19123	CYBC1/SELENOK	2
GO:0061357	positive regulation of Wnt protein secretion	2/1705	3/16374	0.0302566	0.216511	0.19123	VPS35/PTPN23	2
GO:0070370	cellular heat acclimation	2/1705	3/16374	0.0302566	0.216511	0.19123	HSPA1B/HSPA1A	2
GO:0070434	positive regulation of nucleotide-binding oligomerization domain containing 2 signaling pathway	2/1705	3/16374	0.0302566	0.216511	0.19123	HSPA1B/HSPA1A	2
GO:0075206	obsolete positive regulation by host of symbiont cAMP-mediated signal transduction	2/1705	3/16374	0.0302566	0.216511	0.19123	CALM3/CALM1	2
GO:0086100	endothelin receptor signaling pathway	2/1705	3/16374	0.0302566	0.216511	0.19123	CRKL/EDNRB	2
GO:0090128	regulation of synapse maturation	2/1705	3/16374	0.0302566	0.216511	0.19123	CLSTN1/YWHAZ	2
GO:0090168	Golgi reassembly	2/1705	3/16374	0.0302566	0.216511	0.19123	STK25/YWHAZ	2
GO:0090176	microtubule cytoskeleton organization involved in establishment of planar polarity	2/1705	3/16374	0.0302566	0.216511	0.19123	BRSK2/BRSK1	2
GO:0090258	negative regulation of mitochondrial fission	2/1705	3/16374	0.0302566	0.216511	0.19123	MAPT/PINK1	2
GO:0097116	gephyrin clustering involved in postsynaptic density assembly	2/1705	3/16374	0.0302566	0.216511	0.19123	NLGN2/NRXN2	2
GO:0097155	fasciculation of sensory neuron axon	2/1705	3/16374	0.0302566	0.216511	0.19123	MEGF8/EPHA4	2
GO:0098749	cerebellar neuron development	2/1705	3/16374	0.0302566	0.216511	0.19123	CRK/CRKL	2
GO:0098921	retrograde trans-synaptic signaling by endocannabinoid	2/1705	3/16374	0.0302566	0.216511	0.19123	FABP5/CNR1	2
GO:0098963	dendritic transport of messenger ribonucleoprotein complex	2/1705	3/16374	0.0302566	0.216511	0.19123	HNRNPU/PURA	2
GO:0099074	mitochondrion to lysosome transport	2/1705	3/16374	0.0302566	0.216511	0.19123	VPS35/PINK1	2
GO:0099152	regulation of neurotransmitter receptor transport, endosome to postsynaptic membrane	2/1705	3/16374	0.0302566	0.216511	0.19123	GRIPAP1/ARHGAP44	2
GO:0099183	trans-synaptic signaling by BDNF, modulating synaptic transmission	2/1705	3/16374	0.0302566	0.216511	0.19123	NTRK2/SYT4	2
GO:0099525	presynaptic dense core vesicle exocytosis	2/1705	3/16374	0.0302566	0.216511	0.19123	STXBP1/SYT4	2
GO:0099545	trans-synaptic signaling by trans-synaptic complex	2/1705	3/16374	0.0302566	0.216511	0.19123	IL1RAPL1/PTPRD	2
GO:1902958	positive regulation of mitochondrial electron transport, NADH to ubiquinone	2/1705	3/16374	0.0302566	0.216511	0.19123	PARK7/PINK1	2
GO:1903070	negative regulation of ER-associated ubiquitin-dependent protein catabolic process	2/1705	3/16374	0.0302566	0.216511	0.19123	USP14/SGTA	2
GO:1903288	positive regulation of potassium ion import across plasma membrane	2/1705	3/16374	0.0302566	0.216511	0.19123	ATP1B1/ATP1B2	2
GO:1903539	protein localization to postsynaptic membrane	2/1705	3/16374	0.0302566	0.216511	0.19123	GRIN2A/GRIN1	2
GO:1904036	negative regulation of epithelial cell apoptotic process	2/1705	3/16374	0.0302566	0.216511	0.19123	HMOX1/NUPR1	2
GO:1904579	cellular response to thapsigargin	2/1705	3/16374	0.0302566	0.216511	0.19123	CLU/FIS1	2
GO:1904715	negative regulation of chaperone-mediated autophagy	2/1705	3/16374	0.0302566	0.216511	0.19123	SNRNP70/CTSA	2
GO:1905244	regulation of modification of synaptic structure	2/1705	3/16374	0.0302566	0.216511	0.19123	GRIPAP1/EPHA4	2
GO:1905668	positive regulation of protein localization to endosome	2/1705	3/16374	0.0302566	0.216511	0.19123	ABHD17B/ABHD17A	2
GO:1905671	regulation of lysosome organization	2/1705	3/16374	0.0302566	0.216511	0.19123	SCARB2/LAPTM4B	2
GO:1905897	regulation of response to endoplasmic reticulum stress	2/1705	3/16374	0.0302566	0.216511	0.19123	NFE2L1/NUPR1	2
GO:2000120	positive regulation of sodium-dependent phosphate transport	2/1705	3/16374	0.0302566	0.216511	0.19123	ATF4/CEBPB	2
GO:2000312	regulation of kainate selective glutamate receptor activity	2/1705	3/16374	0.0302566	0.216511	0.19123	KLHL24/NETO2	2
GO:0072594	establishment of protein localization to organelle	12/1705	64/16374	0.0309102	0.220875	0.195085	MAPK1/MAPT/LAMP1/FLNA/NOLC1/DMAP1/VPS28/PKIA/CHP1/TRIM28/DNAJA1/RAN	12
GO:0000910	cytokinesis	15/1705	86/16374	0.0312735	0.221537	0.195669	CDC42/KLHL21/KIF3B/CCP110/GIPC1/RHOA/CDC25B/KLHL9/PIN1/GIT1/CENPV/CIT/CALM3/CALM1/RAB11FIP4	15
GO:0006928	movement of cell or subcellular component	15/1705	86/16374	0.0312735	0.221537	0.195669	CRK/INPP5F/NRP1/PKN1/RHOA/SSX2IP/CD9/SPOCK2/CADM4/PIN1/CFAP20/STMN1/PHPT1/NRG1/SHTN1	15
GO:0000266	mitochondrial fission	7/1705	30/16374	0.0312882	0.221537	0.195669	MAPT/SLC25A46/VPS35/BNIP3/INF2/PINK1/FIS1	7
GO:0006369	termination of RNA polymerase II transcription	7/1705	30/16374	0.0312882	0.221537	0.195669	PAPOLA/PCF11/PABPN1/SNRPE/SNRPG/NCBP2/SNRPB	7
GO:0051491	positive regulation of filopodium assembly	7/1705	30/16374	0.0312882	0.221537	0.195669	FNBP1L/DPYSL3/CDC42/NRP1/PALM/TENM2/TENM1	7
GO:0090314	positive regulation of protein targeting to membrane	7/1705	30/16374	0.0312882	0.221537	0.195669	TCAF1/PAK1/CHP1/STOM/FIS1/PRNP/ANK3	7
GO:0034599	cellular response to oxidative stress	17/1705	101/16374	0.0313098	0.221537	0.195669	NFE2L1/SELENOS/CPEB2/ATP2A2/PARK7/HMOX1/GSTP1/ATP13A2/PARP1/MGAT3/SOD1/HSPA1B/PINK1/PRDX1/CYCS/HSPA1A/MT3	17
GO:0016579	protein deubiquitination	35/1705	244/16374	0.0315267	0.222759	0.196749	USP14/USP22/SNX3/PSMC6/USP7/JOSD1/EIF3F/YY1/PSMB1/USP11/PARK7/CCP110/KAT2A/RHOA/PSMD3/PSMD7/PSMB4/PSMD8/OTUB1/PSMD2/PSMB5/PSMA7/PSMA4/USP1/NOP53/NFKBIA/TADA3/TOMM20/UBXN1/PSMB3/KEAP1/USP5/UBC/ACTB/UBB	35
GO:0006368	transcription elongation from RNA polymerase II promoter	14/1705	79/16374	0.0324658	0.229074	0.202326	HNRNPU/POLR2B/SUPT16H/RTF1/POLR2A/ELOC/NELFB/NCBP2/SSRP1/POLR2E/MLLT1/GTF2F1/POLR2L/ELOB	14
GO:0033673	negative regulation of kinase activity	5/1705	18/16374	0.0328475	0.229992	0.203137	HNRNPU/MAPT/DUSP3/PTPRT/CSK	5
GO:0060307	regulation of ventricular cardiac muscle cell membrane repolarization	5/1705	18/16374	0.0328475	0.229992	0.203137	AKAP9/WDR1/CACNA2D1/SNTA1/GJA1	5
GO:0097106	postsynaptic density organization	5/1705	18/16374	0.0328475	0.229992	0.203137	PTPRS/NLGN2/NRXN2/LRFN4/PTPRD	5
GO:1901214	regulation of neuron death	5/1705	18/16374	0.0328475	0.229992	0.203137	SARM1/EGLN1/CLU/CHP1/UBB	5
GO:0046697	decidualization	6/1705	24/16374	0.032869	0.229992	0.203137	MAPK1/SPP1/BSG/GJA1/CTSB/JUNB	6
GO:0061726	mitochondrion disassembly	6/1705	24/16374	0.032869	0.229992	0.203137	BNIP3L/PARK7/VDAC1/BNIP3/ATP13A2/PINK1	6
GO:0030518	intracellular steroid hormone receptor signaling pathway	13/1705	72/16374	0.0335456	0.234402	0.207032	DDX5/UFM1/WBP2/ZBTB7A/DDRGK1/PARK7/PAK1/RHOA/CALCOCO1/PARP1/PHB2/PHB/CALR	13
GO:0060070	canonical Wnt signaling pathway	41/1705	295/16374	0.0337463	0.234922	0.207491	CHD8/WNK1/UBE2B/GPRC5B/CSNK1D/PSMC6/FZD3/DDX3X/DDIT3/VPS35/PSMB1/FGFR2/RBX1/PSMD3/PSMD7/PSMB4/PSMD8/PSMD2/PSMB5/TMEM170B/EMD/PFDN5/APC2/PSMA7/PSMA4/DAAM2/STK11/APOE/RUVBL2/SOX9/SOX4/PSMB3/PTPRO/DVL1/HECW1/CSNK1E/PIN1/RNF220/DKK3/AES/AMER2	41
GO:0007162	negative regulation of cell adhesion	8/1705	37/16374	0.0337595	0.234922	0.207491	MIA3/ADAM22/CD164/PDE3B/SEMA4D/DSCAM/DAB1/ARHGDIA	8
GO:0031098	stress-activated protein kinase signaling cascade	8/1705	37/16374	0.0337595	0.234922	0.207491	MAPK1/STK25/RHOA/HMGCR/ARL6IP5/GSTP1/MAP2K2/PRDX1	8
GO:0044265	cellular macromolecule catabolic process	9/1705	44/16374	0.0349677	0.242328	0.214033	HSP90AA1/PTTG1IP/EZR/VPS35/CDK5RAP3/CLPX/CTSL/LGMN/CTSB	9
GO:0050905	neuromuscular process	9/1705	44/16374	0.0349677	0.242328	0.214033	CHD8/MYCBP2/AGTPBP1/BACE1/TMEM150C/DVL1/GRIN1/PCDH15/FGF12	9
GO:0090150	establishment of protein localization to membrane	9/1705	44/16374	0.0349677	0.242328	0.214033	TCAF1/PAK1/GDI1/CHP1/STOM/RAB11B/FIS1/PRNP/ANK3	9
GO:0006611	protein export from nucleus	10/1705	51/16374	0.0353175	0.243748	0.215287	PTPN11/YWHAE/TXN/PARK7/RANGAP1/EMD/CHP1/GAS6/CALR/RAN	10
GO:0051496	positive regulation of stress fiber assembly	10/1705	51/16374	0.0353175	0.243748	0.215287	TPM1/CD47/PPM1E/CDC42/NRP1/PAK1/RHOA/RAC1/BAG4/S100A10	10
GO:1901215	negative regulation of neuron death	10/1705	51/16374	0.0353175	0.243748	0.215287	TMEM259/VPS35/SORL1/PARK7/AKT1/EIF4G1/REL/CSF1/APOE/ATP13A2	10
GO:0048193	Golgi vesicle transport	7/1705	31/16374	0.0369027	0.253995	0.224338	VAPA/TMED10/ARF1/PRKCI/SORL1/ARL1/RNF139	7
GO:0060711	labyrinthine layer development	7/1705	31/16374	0.0369027	0.253995	0.224338	MAPK1/DNAJB6/AKT1/EGLN1/HS6ST1/TMED2/JUNB	7
GO:0006406	mRNA export from nucleus	17/1705	103/16374	0.0369882	0.254237	0.224551	SRSF11/HNRNPA2B1/RANBP2/SRRM1/AKAP8L/RNPS1/SRSF2/SRSF3/FYTTD1/ALKBH5/THOC7/RBM8A/NCBP2/DDX39A/U2AF2/SRSF9/SLU7	17
GO:0006283	transcription-coupled nucleotide-excision repair	13/1705	73/16374	0.0370697	0.254451	0.224741	POLR2B/DDB1/USP7/POLR2A/COPS6/RBX1/POLD2/GPS1/PRPF19/POLR2E/POLR2L/UBC/UBB	13
GO:0065003	protein-containing complex assembly	32/1705	223/16374	0.038205	0.25969	0.229367	PTPN11/KIFAP3/DDX3X/HSP90AA1/CDC42/TUBGCP2/SORL1/PARK7/TAPBP/RHOA/DLG4/ULK1/LMO4/AIMP2/STXBP1/PPP2R1A/GSN/NOP53/VAMP3/WASF1/SOX9/PIH1D1/BAX/RPS3/ADD2/NUPR1/BRK1/PINK1/HSPA8/RIMS1/ELOB/GFAP	32
GO:0001558	regulation of cell growth	12/1705	66/16374	0.0382646	0.25969	0.229367	LAMTOR1/CLSTN1/DDR1/CDK11B/IGFBP7/CRKL/STK11/EPB41L3/PAK5/FAM107A/CLSTN3/SGK1	12
GO:0045184	establishment of protein localization	12/1705	66/16374	0.0382646	0.25969	0.229367	KPNB1/NDFIP1/SNX3/WBP2/FLNA/SELENOS/DLG4/DERL1/RAP2A/CHP1/DNAJA1/ANK3	12
GO:0070373	negative regulation of ERK1 and ERK2 cascade	12/1705	66/16374	0.0382646	0.25969	0.229367	EIF3A/EZR/LMO3/NDRG2/SIRPA/DUSP3/GSTP1/ATF3/CSK/PIN1/PHB/CAMK2N1	12
GO:0030516	regulation of axon extension	4/1705	13/16374	0.038861	0.25969	0.229367	RAB21/DPYSL2/APOE/OLFM1	4
GO:0033120	positive regulation of RNA splicing	4/1705	13/16374	0.038861	0.25969	0.229367	HNRNPLL/POLR2A/U2AF2/HSPA1A	4
GO:0035372	protein localization to microtubule	4/1705	13/16374	0.038861	0.25969	0.229367	ABHD17B/ABHD17A/DVL1/MAP1A	4
GO:0036474	cell death in response to hydrogen peroxide	4/1705	13/16374	0.038861	0.25969	0.229367	TXN/PARK7/GPR37L1/PSAP	4
GO:0043951	negative regulation of cAMP-mediated signaling	4/1705	13/16374	0.038861	0.25969	0.229367	UBE2B/PDE4D/PDE3B/CDC34	4
GO:0043968	histone H2A acetylation	4/1705	13/16374	0.038861	0.25969	0.229367	MORF4L1/MEAF6/DMAP1/RUVBL2	4
GO:0048313	Golgi inheritance	4/1705	13/16374	0.038861	0.25969	0.229367	MAPK1/STK25/YWHAZ/MAP2K2	4
GO:0048715	negative regulation of oligodendrocyte differentiation	4/1705	13/16374	0.038861	0.25969	0.229367	ID4/TMEM98/DAAM2/ID2	4
GO:0050655	dermatan sulfate proteoglycan metabolic process	4/1705	13/16374	0.038861	0.25969	0.229367	DSEL/BCAN/NCAN/CSPG5	4
GO:0051085	chaperone cofactor-dependent protein refolding	4/1705	13/16374	0.038861	0.25969	0.229367	PTGES3/DNAJB14/HSPH1/DNAJB1	4
GO:0061462	protein localization to lysosome	4/1705	13/16374	0.038861	0.25969	0.229367	LAMTOR4/RTN4/LAMTOR5/CD81	4
GO:0070265	necrotic cell death	4/1705	13/16374	0.038861	0.25969	0.229367	MT-CO2/BNIP3/BAX/MT3	4
GO:0070431	nucleotide-binding oligomerization domain containing 2 signaling pathway	4/1705	13/16374	0.038861	0.25969	0.229367	NFKBIA/RELA/HSPA1B/HSPA1A	4
GO:1903204	negative regulation of oxidative stress-induced neuron death	4/1705	13/16374	0.038861	0.25969	0.229367	NCOA7/OXR1/ATF4/PINK1	4
GO:1903364	positive regulation of cellular protein catabolic process	4/1705	13/16374	0.038861	0.25969	0.229367	HSP90AA1/PTTG1IP/EZR/VPS35	4
GO:2001224	positive regulation of neuron migration	4/1705	13/16374	0.038861	0.25969	0.229367	RAPGEF2/FLNA/NSMF/SHTN1	4
GO:0000375	RNA splicing, via transesterification reactions	6/1705	25/16374	0.0395615	0.262634	0.231968	SRRM1/SF3B1/TXNL4A/BCAS2/KHSRP/SLU7	6
GO:0001941	postsynaptic membrane organization	6/1705	25/16374	0.0395615	0.262634	0.231968	NLGN2/DLG4/GLRB/APOE/DVL1/NRXN2	6
GO:0045740	positive regulation of DNA replication	6/1705	25/16374	0.0395615	0.262634	0.231968	JUN/CACYBP/RAC1/TNFAIP1/CTC1/CST3	6
GO:0046717	acid secretion	6/1705	25/16374	0.0395615	0.262634	0.231968	SLC6A1/P2RX7/SYT4/SGK1/GRM7/SV2A	6
GO:1900182	positive regulation of protein localization to nucleus	6/1705	25/16374	0.0395615	0.262634	0.231968	CDK5RAP3/PARK7/AKT1/TRIM8/STK11/PARP1	6
GO:0001783	B cell apoptotic process	5/1705	19/16374	0.0408698	0.269197	0.237765	SLC39A10/PKN1/CRKL/NOC2L/BAX	5
GO:0019068	virion assembly	5/1705	19/16374	0.0408698	0.269197	0.237765	CHMP5/PPIA/APOE/UBC/UBB	5
GO:0050919	negative chemotaxis	5/1705	19/16374	0.0408698	0.269197	0.237765	RHOA/PLXNA3/SLIT2/PLXNA4/EPHA7	5
GO:0060716	labyrinthine layer blood vessel development	5/1705	19/16374	0.0408698	0.269197	0.237765	MAPK1/AKT1/HS6ST1/TMED2/JUNB	5
GO:0071294	cellular response to zinc ion	5/1705	19/16374	0.0408698	0.269197	0.237765	ATP13A2/PARP1/MT2A/MT1X/MT1E	5
GO:1902236	negative regulation of endoplasmic reticulum stress-induced intrinsic apoptotic signaling pathway	5/1705	19/16374	0.0408698	0.269197	0.237765	SELENOS/PARK7/HERPUD1/TMBIM6/HSPA1A	5
GO:0006600	creatine metabolic process	3/1705	8/16374	0.0422687	0.269964	0.238442	GATM/SLC6A8/CKB	3
GO:0021955	central nervous system neuron axonogenesis	3/1705	8/16374	0.0422687	0.269964	0.238442	HSP90AA1/B4GALT6/HSP90AB1	3
GO:0032471	negative regulation of endoplasmic reticulum calcium ion concentration	3/1705	8/16374	0.0422687	0.269964	0.238442	BAX/BCAP31/FIS1	3
GO:0038180	nerve growth factor signaling pathway	3/1705	8/16374	0.0422687	0.269964	0.238442	RAPGEF2/SORT1/KIDINS220	3
GO:0043462	regulation of ATPase activity	3/1705	8/16374	0.0422687	0.269964	0.238442	SNRNP70/BRSK2/VMA21	3
GO:0044154	histone H3-K14 acetylation	3/1705	8/16374	0.0422687	0.269964	0.238442	WBP2/MEAF6/KAT2A	3
GO:0046689	response to mercury ion	3/1705	8/16374	0.0422687	0.269964	0.238442	PARK7/MT-CYB/BSG	3
GO:0048312	intracellular distribution of mitochondria	3/1705	8/16374	0.0422687	0.269964	0.238442	MAPT/CLUH/KAT2A	3
GO:0048799	animal organ maturation	3/1705	8/16374	0.0422687	0.269964	0.238442	RHOA/SEMA4D/FAT4	3
GO:0051208	sequestering of calcium ion	3/1705	8/16374	0.0422687	0.269964	0.238442	SLC25A23/CALR/HSP90B1	3
GO:0051683	establishment of Golgi localization	3/1705	8/16374	0.0422687	0.269964	0.238442	STK25/CDC42/YWHAZ	3
GO:0070863	positive regulation of protein exit from endoplasmic reticulum	3/1705	8/16374	0.0422687	0.269964	0.238442	SORL1/TMEM30A/CD81	3
GO:0097105	presynaptic membrane assembly	3/1705	8/16374	0.0422687	0.269964	0.238442	NLGN2/IL1RAPL1/PTPRD	3
GO:0098887	neurotransmitter receptor transport, endosome to postsynaptic membrane	3/1705	8/16374	0.0422687	0.269964	0.238442	GRIPAP1/VPS35/ARHGAP44	3
GO:0098909	regulation of cardiac muscle cell action potential involved in regulation of contraction	3/1705	8/16374	0.0422687	0.269964	0.238442	AKAP9/ATP2A2/FGF13	3
GO:0098969	neurotransmitter receptor transport to postsynaptic membrane	3/1705	8/16374	0.0422687	0.269964	0.238442	GRIPAP1/CLSTN1/ARHGAP44	3
GO:1901844	regulation of cell communication by electrical coupling involved in cardiac conduction	3/1705	8/16374	0.0422687	0.269964	0.238442	PDE4D/CALM3/CALM1	3
GO:1902018	negative regulation of cilium assembly	3/1705	8/16374	0.0422687	0.269964	0.238442	ODF2L/CCP110/EVI5L	3
GO:1902857	positive regulation of non-motile cilium assembly	3/1705	8/16374	0.0422687	0.269964	0.238442	SEPT9/SEPT7/ATMIN	3
GO:1902966	positive regulation of protein localization to early endosome	3/1705	8/16374	0.0422687	0.269964	0.238442	EZR/SORL1/MGAT3	3
GO:1903115	regulation of actin filament-based movement	3/1705	8/16374	0.0422687	0.269964	0.238442	AKAP9/ATP2A2/FGF13	3
GO:1903214	regulation of protein targeting to mitochondrion	3/1705	8/16374	0.0422687	0.269964	0.238442	BNIP3L/PINK1/ATP5IF1	3
GO:2000601	positive regulation of Arp2/3 complex-mediated actin nucleation	3/1705	8/16374	0.0422687	0.269964	0.238442	ABI2/WASF1/BRK1	3
GO:2000643	positive regulation of early endosome to late endosome transport	3/1705	8/16374	0.0422687	0.269964	0.238442	RAB21/EZR/PTPN23	3
GO:0016570	histone modification	12/1705	67/16374	0.0423689	0.270262	0.238705	UBE2B/AKAP8L/UBE2N/EID1/TAF7/CTBP1/KAT2A/NOC2L/TADA3/RUVBL2/SET/MT3	12
GO:0040011	locomotion	14/1705	82/16374	0.0429281	0.273484	0.241551	CRK/INPP5F/VPS35/ATP1A2/PKN1/RHOA/SSX2IP/SPOCK2/CADM4/PIN1/CFAP20/PHPT1/NRG1/SHTN1	14
GO:0001881	receptor recycling	7/1705	32/16374	0.0431414	0.274152	0.24214	INPP5F/LAMTOR1/CHMP5/VAMP3/CAMLG/OPTN/RAB11B	7
GO:0008631	intrinsic apoptotic signaling pathway in response to oxidative stress	7/1705	32/16374	0.0431414	0.274152	0.24214	P4HB/PARK7/AKT1/ARL6IP5/SOD1/PINK1/HSPB1	7
GO:0046777	protein autophosphorylation	29/1705	201/16374	0.0439409	0.278881	0.246318	WNK1/CLK1/ULK2/STK25/SLK/DDR1/FGFR2/PAK1/JUN/AKT1/ULK1/NTRK2/CDKL5/MAP3K10/ULK3/RAP2A/STK11/MVP/ATP13A2/CHP1/EPHA4/CSK/RASSF2/TRIM28/IRAK1/CALM3/CALM1/CAMK2B/EPHA7	29
GO:0007010	cytoskeleton organization	39/1705	284/16374	0.0440529	0.279241	0.246636	CDC42BPB/ABI2/MAPK1/MAPT/BAIAP2/MYCBP2/TPM1/PDZD8/CCDC88A/CRK/SPTAN1/ARF1/CDC42/PRKCI/SPTBN1/DPYSL2/SH3KBP1/DLC1/RHOA/PALM/PLXNA3/P2RX7/PFDN2/OBSL1/APOE/SOX9/BICD2/TMSB10/EPHA5/SORBS2/BRK1/MICAL2/PAK5/CSPG5/FAM107A/IQCJ-SCHIP1/MAST1/TMSB4X/STMN3	39
GO:0031295	T cell costimulation	10/1705	53/16374	0.0446558	0.282708	0.249698	PTPN11/CDC42/GRB2/PAK1/AKT1/RAC1/CSK/EFNB2/PAK3/LGALS1	10
GO:0061098	positive regulation of protein tyrosine kinase activity	8/1705	39/16374	0.0447523	0.282964	0.249924	GPRC5B/DLG4/LRP8/EPHA4/GAS6/NRG1/PRNP/SRCIN1	8
GO:0045454	cell redox homeostasis	12/1705	68/16374	0.0467696	0.29535	0.260864	DDIT3/TXNL1/TXN/PDIA3/SELENOS/P4HB/TXNDC15/ERO1B/SELENOT/PDIA6/TMX4/PDIA4	12
GO:0006897	endocytosis	32/1705	227/16374	0.0470552	0.295691	0.261165	RAB21/SORT1/ESYT2/DNER/ARF1/CDC42/DPYSL2/HNRNPK/APP/DNM1/SH3KBP1/LRP10/LRPAP1/LRP8/CLU/MTMR6/PPT1/VPS28/SNX10/GSN/RAC1/EPN1/APOE/RIT2/ELMO1/SCAMP5/AP2S1/SYT4/B2M/ADGRB1/CALY/CLIP3	32
GO:0000387	spliceosomal snRNP assembly	6/1705	26/16374	0.0470577	0.295691	0.261165	STRAP/SNRPD1/SNRPE/SNRPG/SNRPD2/SNRPB	6
GO:0042327	positive regulation of phosphorylation	6/1705	26/16374	0.0470577	0.295691	0.261165	PTGES3/ITGA6/APP/NRP1/SDCBP/DSCAM	6
GO:0071377	cellular response to glucagon stimulus	6/1705	26/16374	0.0470577	0.295691	0.261165	PRKACB/PRKAR1B/PRKAR1A/PRKAR2B/ADCY1/ADCY5	6
GO:0006352	DNA-templated transcription, initiation	11/1705	61/16374	0.0484787	0.304242	0.268717	BCLAF1/ZNF451/SMARCA5/TAF7/GTF2A2/JUN/TAF13/PIH1D1/HIST1H4C/UBTF/THRA	11
GO:0010628	positive regulation of gene expression	46/1705	346/16374	0.0495761	0.305725	0.270027	MAPK1/LMNA/DDX3X/EZR/VPS35/APP/DDRGK1/PDCD5/PARK7/AKT1/CALCOCO1/ERP29/KRAS/NTRK2/ATF4/CLU/RPL5/POU3F3/P2RX7/DNAJA4/CSF1/GSN/TMED2/RPL23/TADA3/GJA1/SOX9/RPS3/ID2/HSPA1B/RPL11/GAS6/RPS7/SOX11/ZNF804A/PHB/CALR/NRG1/RIMS1/RIMS2/HSPA1A/OLFM1/PLP1/MT3/CAMK2N1/ANK3	46
GO:0071427	mRNA-containing ribonucleoprotein complex export from nucleus	16/1705	99/16374	0.0496436	0.305725	0.270027	SRSF11/HNRNPA2B1/RANBP2/SRRM1/RNPS1/SRSF2/SRSF3/FYTTD1/ALKBH5/THOC7/RBM8A/NCBP2/DDX39A/U2AF2/SRSF9/SLU7	16
GO:0043087	regulation of GTPase activity	10/1705	54/16374	0.0498984	0.305725	0.270027	CRK/PLXNB2/RALBP1/NTRK2/SBF1/EPHA4/EPHA5/SOD1/RAP1GAP/STMN3	10
GO:0010592	positive regulation of lamellipodium assembly	5/1705	20/16374	0.0499753	0.305725	0.270027	ARPC2/CDC42/AKIRIN1/RAC1/BRK1	5
GO:0046628	positive regulation of insulin receptor signaling pathway	5/1705	20/16374	0.0499753	0.305725	0.270027	PTPN11/NUCKS1/PAK1/GNAI2/ADIPOR1	5
GO:0070584	mitochondrion morphogenesis	5/1705	20/16374	0.0499753	0.305725	0.270027	NDUFS6/FEZ1/POLDIP2/BAX/FIS1	5
GO:0071901	negative regulation of protein serine/threonine kinase activity	5/1705	20/16374	0.0499753	0.305725	0.270027	WNK1/CDK5RAP3/AKT1/YWHAG/HSPB1	5
GO:1902850	microtubule cytoskeleton organization involved in mitosis	5/1705	20/16374	0.0499753	0.305725	0.270027	CLTC/DYNC1H1/NUMA1/MAP9/GNAI1	5
GO:0003091	renal water homeostasis	7/1705	33/16374	0.050022	0.305725	0.270027	PRKACB/PRKAR1B/PRKAR1A/PRKAR2B/AQP4/ADCY1/ADCY5	7
GO:0007616	long-term memory	7/1705	33/16374	0.050022	0.305725	0.270027	CPEB3/KAT2A/APOE/ADCY1/GRIN1/SGK1/PRNP	7
GO:0014003	oligodendrocyte development	7/1705	33/16374	0.050022	0.305725	0.270027	ID4/CD9/GSN/GSTP1/ID2/B4GALT6/SOX11	7
GO:0044260	cellular macromolecule metabolic process	7/1705	33/16374	0.050022	0.305725	0.270027	VPS35/AKT1/EIF4G1/CSF1/EDNRB/NFKBIA/APOE	7
GO:0048011	neurotrophin TRK receptor signaling pathway	7/1705	33/16374	0.050022	0.305725	0.270027	PTPN11/SORT1/GRB2/NTRK2/WASF1/SLC9A6/DDIT4	7
GO:0086001	cardiac muscle cell action potential	7/1705	33/16374	0.050022	0.305725	0.270027	YWHAE/ATP1A2/CACNA2D1/SLC8A1/ATP1B1/ATP1A1/CXADR	7
GO:0001916	positive regulation of T cell mediated cytotoxicity	4/1705	14/16374	0.0500464	0.305725	0.270027	FAM49B/HLA-E/P2RX7/B2M	4
GO:0016242	negative regulation of macroautophagy	4/1705	14/16374	0.0500464	0.305725	0.270027	AKT1/POLDIP2/HMOX1/PINK1	4
GO:0021680	cerebellar Purkinje cell layer development	4/1705	14/16374	0.0500464	0.305725	0.270027	ARCN1/SEZ6/HSPA5/UQCRQ	4
GO:0035493	SNARE complex assembly	4/1705	14/16374	0.0500464	0.305725	0.270027	STXBP6/SEPT8/STXBP1/VAMP3	4
GO:0046688	response to copper ion	4/1705	14/16374	0.0500464	0.305725	0.270027	MT-CO1/MT-CYB/SOD1/ATP5F1D	4
GO:0055093	response to hyperoxia	4/1705	14/16374	0.0500464	0.305725	0.270027	HDAC2/MT-CYB/MT-ATP6/BNIP3	4
GO:0061178	regulation of insulin secretion involved in cellular response to glucose stimulus	4/1705	14/16374	0.0500464	0.305725	0.270027	HMGN3/BRSK2/EPHA5/ADCY5	4
GO:0110148	biomineralization	4/1705	14/16374	0.0500464	0.305725	0.270027	ATF4/SOX9/CEBPB/GAS6	4
GO:0008203	cholesterol metabolic process	17/1705	107/16374	0.0505288	0.308299	0.2723	KPNB1/ACADVL/APP/HMGCS1/NFE2L1/ERLIN2/SORL1/SQLE/IDI1/HMGCR/MVD/APOE/SC5D/FASN/SOD1/SCD/RAN	17
GO:0014909	smooth muscle cell migration	9/1705	47/16374	0.0508454	0.309856	0.273676	CRK/NRP1/DDR1/SORL1/SEMA6D/SLIT2/GSTP1/ARPC5/NDRG4	9
GO:0099504	synaptic vesicle cycle	8/1705	40/16374	0.0510368	0.310648	0.274375	DNAJC5/PRKAR1B/BSN/P2RX7/BRSK1/RAPGEF4/SYN3/RIMS1	8
GO:0031532	actin cytoskeleton reorganization	14/1705	84/16374	0.0511014	0.310667	0.274392	CDC42BPB/EZR/CDC42/FLNA/NRP1/PAK1/RHOA/MICALL2/BRSK2/GSN/RAP2A/PHPT1/ARHGDIA/CXADR	14
GO:0007626	locomotory behavior	15/1705	92/16374	0.0525503	0.315642	0.278787	UBA6/PPP3CB/SOBP/GNAO1/APP/NEGR1/GMFB/ANKH/GAA/DSCAM/SOD1/PAK5/ADCY5/NRG1/CACNA1B	15
GO:0009267	cellular response to starvation	11/1705	62/16374	0.0536225	0.315642	0.278787	WIPI2/LAMP2/MAP1LC3B/WDR45B/GLUL/EHMT2/FADS1/PDK4/KIAA1324/GAS6/HSPA8	11
GO:0040008	regulation of growth	11/1705	62/16374	0.0536225	0.315642	0.278787	MORF4L2/MORF4L1/HEPACAM/DMAP1/TKT/MCTS1/PPP2R1A/RUVBL2/GAS6/CSPG5/AES	11
GO:0071363	cellular response to growth factor stimulus	38/1705	280/16374	0.0537269	0.315642	0.278787	HNRNPH1/MAPK1/POLR2B/RAPGEF2/PTPN11/SORT1/KIDINS220/DDX5/CPNE3/POLR2A/GRB2/FGFR2/ACVR2A/SKIL/RACK1/CRKL/JUN/RAB14/MEGF8/RHOA/HNRNPA1/FEZ1/NCBP2/PTBP1/LRP8/EMD/SLIT2/FAT4/POLR2E/PARP1/GTF2F1/MAP1B/SPARC/GAS6/POLR2L/UBC/UBB/FGF12	38
GO:0046718	viral entry into host cell	18/1705	116/16374	0.0549066	0.315642	0.278787	SCARB2/SNX3/LAMP1/DAG1/P4HB/TRIM8/GSN/EFNB2/IFITM3/GRK2/HSPA1B/GAS6/CTSB/LGALS1/HSPA1A/RPSA/CXADR/CD81	18
GO:0050434	positive regulation of viral transcription	6/1705	27/16374	0.0553742	0.315642	0.278787	POLR2B/POLR2A/NELFB/POLR2E/GTF2F1/POLR2L	6
GO:0051924	regulation of calcium ion transport	6/1705	27/16374	0.0553742	0.315642	0.278787	CACNA2D1/RHOA/GNAI2/GJA1/CAMK2B/CACNA1B	6
GO:0030968	endoplasmic reticulum unfolded protein response	10/1705	55/16374	0.0555361	0.315642	0.278787	CREBRF/CDK5RAP3/PPP1R15B/SELENOS/RACK1/DERL1/STUB1/BAX/PPP1R15A/HSPA5	10
GO:0006629	lipid metabolic process	33/1705	239/16374	0.0563458	0.315642	0.278787	CRK/GOLM1/MGST3/ACSL4/ANGPTL4/CPNE3/HMGCS1/SMARCD3/EDF1/CPNE1/PAFAH1B2/LRP10/CRKL/AKT1/PLIN2/FABP5/ATP5F1A/LRP8/PDE3B/CLU/FADS1/PLTP/HMGCR/NR2F2/APOE/PLCL1/PTPRN2/ADIPOR1/SC5D/ID2/ATP5F1B/ABCA2/THRA	33
GO:0000028	ribosomal small subunit assembly	2/1705	4/16374	0.0563558	0.315642	0.278787	RPS14/RPL38	2
GO:0002265	astrocyte activation involved in immune response	2/1705	4/16374	0.0563558	0.315642	0.278787	APP/GRN	2
GO:0003104	positive regulation of glomerular filtration	2/1705	4/16374	0.0563558	0.315642	0.278787	GJA1/GAS6	2
GO:0006054	N-acetylneuraminate metabolic process	2/1705	4/16374	0.0563558	0.315642	0.278787	ST6GAL1/CMAS	2
GO:0006610	ribosomal protein import into nucleus	2/1705	4/16374	0.0563558	0.315642	0.278787	KPNB1/RPL23	2
GO:0007007	inner mitochondrial membrane organization	2/1705	4/16374	0.0563558	0.315642	0.278787	CHCHD10/PINK1	2
GO:0008626	granzyme-mediated apoptotic signaling pathway	2/1705	4/16374	0.0563558	0.315642	0.278787	LAMP1/BNIP3	2
GO:0010044	response to aluminum ion	2/1705	4/16374	0.0563558	0.315642	0.278787	MAOB/QDPR	2
GO:0010638	positive regulation of organelle organization	2/1705	4/16374	0.0563558	0.315642	0.278787	SURF4/TMED9	2
GO:0015798	myo-inositol transport	2/1705	4/16374	0.0563558	0.315642	0.278787	PGAP1/SLC2A13	2
GO:0018401	peptidyl-proline hydroxylation to 4-hydroxy-L-proline	2/1705	4/16374	0.0563558	0.315642	0.278787	P4HB/EGLN1	2
GO:0021769	orbitofrontal cortex development	2/1705	4/16374	0.0563558	0.315642	0.278787	FGFR2/ARPC5	2
GO:0021888	hypothalamus gonadotrophin-releasing hormone neuron development	2/1705	4/16374	0.0563558	0.315642	0.278787	NRP1/UBB	2
GO:0022615	protein to membrane docking	2/1705	4/16374	0.0563558	0.315642	0.278787	SNX3/STXBP3	2
GO:0030043	actin filament fragmentation	2/1705	4/16374	0.0563558	0.315642	0.278787	WDR1/DSTN	2
GO:0030641	regulation of cellular pH	2/1705	4/16374	0.0563558	0.315642	0.278787	MAPK1/MAFG	2
GO:0031508	pericentric heterochromatin assembly	2/1705	4/16374	0.0563558	0.315642	0.278787	H3F3B/CENPV	2
GO:0031999	negative regulation of fatty acid beta-oxidation	2/1705	4/16374	0.0563558	0.315642	0.278787	AKT1/CNR1	2
GO:0032079	positive regulation of endodeoxyribonuclease activity	2/1705	4/16374	0.0563558	0.315642	0.278787	AKT1/RPS3	2
GO:0032386	regulation of intracellular transport	2/1705	4/16374	0.0563558	0.315642	0.278787	REEP2/REEP1	2
GO:0032387	negative regulation of intracellular transport	2/1705	4/16374	0.0563558	0.315642	0.278787	CRYAB/MAP1B	2
GO:0033590	response to cobalamin	2/1705	4/16374	0.0563558	0.315642	0.278787	MT-CYB/RELA	2
GO:0033591	response to L-ascorbic acid	2/1705	4/16374	0.0563558	0.315642	0.278787	GSTP1/SPARC	2
GO:0033599	regulation of mammary gland epithelial cell proliferation	2/1705	4/16374	0.0563558	0.315642	0.278787	DEAF1/BAX	2
GO:0035751	regulation of lysosomal lumen pH	2/1705	4/16374	0.0563558	0.315642	0.278787	TMEM165/TMEM175	2
GO:0035948	obsolete positive regulation of gluconeogenesis by positive regulation of transcription from RNA polymerase II promoter	2/1705	4/16374	0.0563558	0.315642	0.278787	WDR5/KAT2A	2
GO:0036466	synaptic vesicle recycling via endosome	2/1705	4/16374	0.0563558	0.315642	0.278787	GRIPAP1/BTBD8	2
GO:0036476	neuron death in response to hydrogen peroxide	2/1705	4/16374	0.0563558	0.315642	0.278787	RACK1/PARK7	2
GO:0036481	intrinsic apoptotic signaling pathway in response to hydrogen peroxide	2/1705	4/16374	0.0563558	0.315642	0.278787	STK25/PINK1	2
GO:0046726	positive regulation by virus of viral protein levels in host cell	2/1705	4/16374	0.0563558	0.315642	0.278787	DDB1/HACD3	2
GO:0046833	positive regulation of RNA export from nucleus	2/1705	4/16374	0.0563558	0.315642	0.278787	KHDRBS1/NCBP2	2
GO:0048790	maintenance of presynaptic active zone structure	2/1705	4/16374	0.0563558	0.315642	0.278787	ERC2/BSN	2
GO:0051414	response to cortisol	2/1705	4/16374	0.0563558	0.315642	0.278787	IGFBP7/SLIT2	2
GO:0051771	negative regulation of nitric-oxide synthase biosynthetic process	2/1705	4/16374	0.0563558	0.315642	0.278787	SELENOS/GSTP1	2
GO:0060011	Sertoli cell proliferation	2/1705	4/16374	0.0563558	0.315642	0.278787	ACVR2A/BAX	2
GO:0061355	Wnt protein secretion	2/1705	4/16374	0.0563558	0.315642	0.278787	VPS35/PTPN23	2
GO:0061502	early endosome to recycling endosome transport	2/1705	4/16374	0.0563558	0.315642	0.278787	SORL1/MYO1D	2
GO:0070294	renal sodium ion absorption	2/1705	4/16374	0.0563558	0.315642	0.278787	MAGED2/SGK1	2
GO:0071672	negative regulation of smooth muscle cell chemotaxis	2/1705	4/16374	0.0563558	0.315642	0.278787	SLIT2/GSTP1	2
GO:0071787	endoplasmic reticulum tubular network formation	2/1705	4/16374	0.0563558	0.315642	0.278787	RTN3/RTN4	2
GO:0090063	positive regulation of microtubule nucleation	2/1705	4/16374	0.0563558	0.315642	0.278787	HSPA1B/HSPA1A	2
GO:0090170	regulation of Golgi inheritance	2/1705	4/16374	0.0563558	0.315642	0.278787	MAPK1/MAP2K2	2
GO:0097201	negative regulation of transcription from RNA polymerase II promoter in response to stress	2/1705	4/16374	0.0563558	0.315642	0.278787	DNAJB1/HSPA1A	2
GO:0097680	double-strand break repair via classical nonhomologous end joining	2/1705	4/16374	0.0563558	0.315642	0.278787	XRCC6/ZBTB7A	2
GO:0099171	presynaptic modulation of chemical synaptic transmission	2/1705	4/16374	0.0563558	0.315642	0.278787	GIT1/PRKCB	2
GO:1900221	regulation of amyloid-beta clearance	2/1705	4/16374	0.0563558	0.315642	0.278787	CLU/APOE	2
GO:1901798	positive regulation of signal transduction by p53 class mediator	2/1705	4/16374	0.0563558	0.315642	0.278787	CDK5RAP3/RPL23	2
GO:1901991	negative regulation of mitotic cell cycle phase transition	2/1705	4/16374	0.0563558	0.315642	0.278787	ZFP36L1/ZFP36L2	2
GO:1902177	positive regulation of oxidative stress-induced intrinsic apoptotic signaling pathway	2/1705	4/16374	0.0563558	0.315642	0.278787	PARK7/SOD1	2
GO:1902952	positive regulation of dendritic spine maintenance	2/1705	4/16374	0.0563558	0.315642	0.278787	APOE/ZNF804A	2
GO:1902953	positive regulation of ER to Golgi vesicle-mediated transport	2/1705	4/16374	0.0563558	0.315642	0.278787	ARF1/SORL1	2
GO:1903208	negative regulation of hydrogen peroxide-induced neuron death	2/1705	4/16374	0.0563558	0.315642	0.278787	RACK1/PARK7	2
GO:1903278	positive regulation of sodium ion export across plasma membrane	2/1705	4/16374	0.0563558	0.315642	0.278787	ATP1B1/ATP1B2	2
GO:1903377	negative regulation of oxidative stress-induced neuron intrinsic apoptotic signaling pathway	2/1705	4/16374	0.0563558	0.315642	0.278787	PARK7/NONO	2
GO:1903416	response to glycoside	2/1705	4/16374	0.0563558	0.315642	0.278787	ATP1A2/ATP1A1	2
GO:1903670	regulation of sprouting angiogenesis	2/1705	4/16374	0.0563558	0.315642	0.278787	GLUL/CEMIP2	2
GO:1904044	response to aldosterone	2/1705	4/16374	0.0563558	0.315642	0.278787	PARP1/RPL27	2
GO:1905098	negative regulation of guanyl-nucleotide exchange factor activity	2/1705	4/16374	0.0563558	0.315642	0.278787	GPSM1/STMN1	2
GO:1990441	negative regulation of transcription from RNA polymerase II promoter in response to endoplasmic reticulum stress	2/1705	4/16374	0.0563558	0.315642	0.278787	JUN/TMBIM6	2
GO:1990809	endoplasmic reticulum tubular network membrane organization	2/1705	4/16374	0.0563558	0.315642	0.278787	ATL1/RTN4	2
GO:1990910	response to hypobaric hypoxia	2/1705	4/16374	0.0563558	0.315642	0.278787	ADAM15/FIS1	2
GO:2000825	positive regulation of androgen receptor activity	2/1705	4/16374	0.0563558	0.315642	0.278787	PARK7/BUD31	2
GO:0051973	positive regulation of telomerase activity	7/1705	34/16374	0.0575578	0.321804	0.284229	MAPK1/PTGES3/CCT4/HSP90AA1/CCT2/TCP1/HSP90AB1	7
GO:0042593	glucose homeostasis	16/1705	101/16374	0.0578292	0.321804	0.284229	PTPN11/SESN3/PARK7/AKT1/ERO1B/FABP5/SELENOT/PDK4/STK11/RPS6/ADIPOR1/SOX4/CNR1/VGF/STXBP5L/CSMD1	16
GO:0016575	histone deacetylation	8/1705	41/16374	0.0578629	0.321804	0.284229	AKAP8L/MORF4L1/HDAC2/NACC2/CTBP1/HDAC5/TADA3/PHB	8
GO:0098761	cellular response to interleukin-7	8/1705	41/16374	0.0578629	0.321804	0.284229	STIP1/PDIA3/P4HB/CRKL/GIPC1/YBX1/HDGF/ATP5F1B	8
GO:0007191	adenylate cyclase-activating dopamine receptor signaling pathway	3/1705	9/16374	0.0586025	0.321804	0.284229	GNB1/GNG2/ADCY5	3
GO:0015812	gamma-aminobutyric acid transport	3/1705	9/16374	0.0586025	0.321804	0.284229	SLC6A1/P2RX7/SV2A	3
GO:0019852	L-ascorbic acid metabolic process	3/1705	9/16374	0.0586025	0.321804	0.284229	SLC23A2/CYB5R3/SLC2A3	3
GO:0021612	facial nerve structural organization	3/1705	9/16374	0.0586025	0.321804	0.284229	NRP1/PLXNA3/PLXNA4	3
GO:0032292	peripheral nervous system axon ensheathment	3/1705	9/16374	0.0586025	0.321804	0.284229	AKT1/SOD1/NDRG1	3
GO:0032463	negative regulation of protein homooligomerization	3/1705	9/16374	0.0586025	0.321804	0.284229	VPS35/CLU/CRYAB	3
GO:0034405	response to fluid shear stress	3/1705	9/16374	0.0586025	0.321804	0.284229	AKT1/P2RX7/GJA1	3
GO:0043084	penile erection	3/1705	9/16374	0.0586025	0.321804	0.284229	ACVR2A/EDNRB/CNR1	3
GO:0048712	negative regulation of astrocyte differentiation	3/1705	9/16374	0.0586025	0.321804	0.284229	ID4/DAB1/GPR37L1	3
GO:0097011	cellular response to granulocyte macrophage colony-stimulating factor stimulus	3/1705	9/16374	0.0586025	0.321804	0.284229	MAPK1/AKT1/ZFP36L2	3
GO:0098792	xenophagy	3/1705	9/16374	0.0586025	0.321804	0.284229	WIPI2/LGALS8/OPTN	3
GO:0098814	spontaneous synaptic transmission	3/1705	9/16374	0.0586025	0.321804	0.284229	APP/SYT1/RIMS2	3
GO:0098974	postsynaptic actin cytoskeleton organization	3/1705	9/16374	0.0586025	0.321804	0.284229	ARF1/ACTB/FRMPD4	3
GO:2000727	positive regulation of cardiac muscle cell differentiation	3/1705	9/16374	0.0586025	0.321804	0.284229	KAT2A/EFNB2/NRG1	3
GO:0000956	nuclear-transcribed mRNA catabolic process	13/1705	78/16374	0.058669	0.32182	0.284243	DDX6/PABPC1/DDX5/ZFP36L1/CNOT6L/CPEB3/ZFP36L2/LSM5/LSM7/EXOSC6/LSM3/LSM4/TOB1	13
GO:0000187	activation of MAPK activity	18/1705	117/16374	0.0588464	0.322443	0.284793	MAPK1/MAP3K2/PTPN11/UBE2N/CRKL/ERP29/SHC2/P2RX7/MADD/MAP2K2/SOD1/IRAK1/PAK3/UBC/NRG1/PEA15/UBB/CD81	18
GO:0071277	cellular response to calcium ion	11/1705	63/16374	0.0591186	0.323583	0.2858	WNK1/CPNE3/CPNE1/JUN/CACYBP/LGMN/SLC25A23/SYT1/ADCY1/HSPA5/JUNB	11
GO:0048255	mRNA stabilization	5/1705	21/16374	0.0601739	0.327508	0.289267	HNRNPU/LARP1/PABPC1/CIRBP/PAIP1	5
GO:0048260	positive regulation of receptor-mediated endocytosis	5/1705	21/16374	0.0601739	0.327508	0.289267	RAB21/HNRNPK/CLU/PPT1/B2M	5
GO:0048485	sympathetic nervous system development	5/1705	21/16374	0.0601739	0.327508	0.289267	FZD3/NRP1/SOX4/PLXNA4/SOX11	5
GO:0051000	positive regulation of nitric-oxide synthase activity	5/1705	21/16374	0.0601739	0.327508	0.289267	AKT1/KRAS/APOE/CALM3/DHFR	5
GO:0060560	developmental growth involved in morphogenesis	5/1705	21/16374	0.0601739	0.327508	0.289267	PTPRS/ULK2/SEMA4D/FGF13/EPHA7	5
GO:0003015	heart process	14/1705	86/16374	0.0602895	0.327508	0.289267	TPM1/DMPK/GNAO1/ATP1A2/PDE4D/ATP2A2/SLC8A1/ATP1B1/GAA/VEGFB/GRK2/ATP1A1/THRA/CACNA1B	14
GO:0034446	substrate adhesion-dependent cell spreading	14/1705	86/16374	0.0602895	0.327508	0.289267	ARPC2/CRK/CDC42/FLNA/NRP1/CRKL/MICALL2/RAC1/VAMP3/S100A10/CSPG5/DOCK5/CALR/SRCIN1	14
GO:0008284	positive regulation of cell population proliferation	59/1705	464/16374	0.0611275	0.331704	0.292973	CSNK2A1/NAP1L1/IL6ST/NPM1/CD47/CCND2/CNOT6L/CNBP/HDAC2/SSR1/NACC2/ODC1/DDRGK1/FGFR2/SDCBP/CRKL/PAK1/AKT1/HIPK1/EIF4G1/AKIRIN2/NOLC1/ID4/PURA/CDC25B/KRAS/NTRK2/LGMN/MCTS1/GNAI2/POU3F3/NACC1/CSF1/MVD/EDNRB/ROGDI/RPL23/ATF3/DNAJA2/SOX9/COPS9/PRMT1/SOX4/RELA/CAPN1/EFNB2/S100B/BRK1/FZR1/TIMP1/STX3/CST3/RPS15A/SOX11/CALR/NRG1/RPS9/RPS4X/CD81	59
GO:0001836	release of cytochrome c from mitochondria	10/1705	56/16374	0.0615767	0.333783	0.294809	LMNA/PDCD5/JUN/AKT1/CLU/CHCHD10/BNIP3/BAX/PINK1/FIS1	10
GO:0038127	ERBB signaling pathway	12/1705	71/16374	0.0618238	0.334763	0.295674	MAPK1/PTPN11/CDC42/GRB2/SH3KBP1/AKT1/LGMN/EPN1/DUSP3/MVP/RTN4/NRG1	12
GO:0006098	pentose-phosphate shunt	4/1705	15/16374	0.0628023	0.33717	0.297801	PGLS/TALDO1/TKT/PGAM1	4
GO:0035994	response to muscle stretch	4/1705	15/16374	0.0628023	0.33717	0.297801	JUN/SLC8A1/NFKBIA/RELA	4
GO:0042921	glucocorticoid receptor signaling pathway	4/1705	15/16374	0.0628023	0.33717	0.297801	LMO3/YWHAH/PHB/CALR	4
GO:0048012	hepatocyte growth factor receptor signaling pathway	4/1705	15/16374	0.0628023	0.33717	0.297801	NRP1/PAK1/RAC1/STMN1	4
GO:0050658	RNA transport	4/1705	15/16374	0.0628023	0.33717	0.297801	HNRNPA2B1/KHDRBS1/NCBP2/RBFOX1	4
GO:0060134	prepulse inhibition	4/1705	15/16374	0.0628023	0.33717	0.297801	CHD8/BACE1/DVL1/GRIN1	4
GO:0061158	3'-UTR-mediated mRNA destabilization	4/1705	15/16374	0.0628023	0.33717	0.297801	ZFP36L1/CPEB3/ZFP36L2/KHSRP	4
GO:0070585	protein localization to mitochondrion	4/1705	15/16374	0.0628023	0.33717	0.297801	MAPT/AKT1/DNAJA1/PINK1	4
GO:0055007	cardiac muscle cell differentiation	9/1705	49/16374	0.0637031	0.341281	0.301432	HNRNPU/LMNA/KAT2A/CACYBP/SGCB/SLC8A1/EFNB2/CALR/NRG1	9
GO:0071230	cellular response to amino acid stimulus	9/1705	49/16374	0.0637031	0.341281	0.301432	LAMTOR1/CPEB3/NTRK2/RRAGC/COL6A1/CEBPB/LAMTOR4/LAMTOR5/NSMF	9
GO:0008217	regulation of blood pressure	13/1705	79/16374	0.0638303	0.3416	0.301713	WNK1/NISCH/ATP1A2/HMOX1/ATP2B1/NR2F2/EDNRB/AGTRAP/SOD1/ATP1A1/GPR37L1/SGK1/CACNA1B	13
GO:0043484	regulation of RNA splicing	6/1705	28/16374	0.06452	0.343472	0.303367	HNRNPH1/SON/CLK1/SNRNP70/AHNAK/FASTK	6
GO:0045648	positive regulation of erythrocyte differentiation	6/1705	28/16374	0.06452	0.343472	0.303367	ACVR2A/PRMT1/ID2/HSPA1B/ISG15/HSPA1A	6
GO:0050654	chondroitin sulfate proteoglycan metabolic process	6/1705	28/16374	0.06452	0.343472	0.303367	DSEL/IMPAD1/BCAN/NCAN/CSPG5/CHSY3	6
GO:0060292	long-term synaptic depression	6/1705	28/16374	0.06452	0.343472	0.303367	MAPT/ARF1/STXBP1/SORCS3/PICK1/SHANK2	6
GO:0061621	canonical glycolysis	6/1705	28/16374	0.06452	0.343472	0.303367	ENO1/PFKL/PKM/PGAM1/ENO2/PGM2L1	6
GO:0006997	nucleus organization	8/1705	42/16374	0.0652392	0.34657	0.306103	GOLM1/NUMA1/DMPK/NFE2L1/CHMP5/CHMP1A/H3F3B/SUN2	8
GO:0051028	mRNA transport	8/1705	42/16374	0.0652392	0.34657	0.306103	AKAP8L/ZFP36L1/G3BP2/HNRNPA1/KIF5C/KHSRP/MVP/BICD2	8
GO:0051017	actin filament bundle assembly	7/1705	35/16374	0.0657575	0.348957	0.308211	BAIAP2/DPYSL3/EZR/FLNA/ADD2/FAM107A/MARCKS	7
GO:0045732	positive regulation of protein catabolic process	10/1705	57/16374	0.0680264	0.360619	0.318511	CSNK2A1/DDB1/LPCAT1/SORL1/VPS28/OAZ2/RNF41/GJA1/SOX9/FZR1	10
GO:0008625	extrinsic apoptotic signaling pathway via death domain receptors	13/1705	80/16374	0.069284	0.3669	0.324059	SORT1/DDX3X/TNFRSF1A/SKIL/PARK7/HMOX1/MADD/TMBIM1/BEX3/ATF3/BAX/FEM1B/PEA15	13
GO:0001667	ameboidal-type cell migration	14/1705	88/16374	0.0705309	0.371429	0.328059	STRAP/PTPN23/PAK1/JUN/AKT1/CAP1/SLC8A1/ADIPOR1/BAG4/SOX9/RTN4/CENPV/PAK3/DOCK5	14
GO:0048010	vascular endothelial growth factor receptor signaling pathway	14/1705	88/16374	0.0705309	0.371429	0.328059	BAIAP2/CRK/HSP90AA1/CDC42/NRP1/RHOA/SHC2/RAC1/VEGFB/CADM4/ELMO1/BRK1/MT3/PRKCB	14
GO:1903409	reactive oxygen species biosynthetic process	14/1705	88/16374	0.0705309	0.371429	0.328059	HSP90AA1/CD47/PARK7/DDAH2/AKT1/RHOA/MT-CO2/CLU/SIRPA/KHSRP/RAC1/HSP90AB1/GRIN1/ADGRB1	14
GO:0035176	social behavior	9/1705	50/16374	0.0708382	0.371429	0.328059	CHD8/DLG4/CIC/CNTNAP2/BRINP1/DVL1/NRXN2/GRIN1/SHANK2	9
GO:0051604	protein maturation	9/1705	50/16374	0.0708382	0.371429	0.328059	HSPD1/PRKACB/TMEM59/SORL1/TMEM98/SERPINH1/STUB1/RNF139/PRNP	9
GO:1903078	positive regulation of protein localization to plasma membrane	9/1705	50/16374	0.0708382	0.371429	0.328059	KIF5B/EZR/PRKCI/SPTBN1/SQSTM1/AKT1/DPP10/STX3/CLIP3	9
GO:0051403	stress-activated MAPK cascade	28/1705	202/16374	0.0710959	0.371429	0.328059	MAPK1/MAP3K2/HACD3/EZR/STK25/APP/SDCBP/PKN1/AKT1/MAP3K10/ZNF675/SIRPA/SKP1/HMGCR/CRYAB/RAP2A/ARL6IP5/DUSP3/GSTP1/MAP2K2/PRMT1/RASSF2/EMC10/UBC/GADD45B/PINK1/PRDX1/UBB	28
GO:0043154	negative regulation of cysteine-type endopeptidase activity involved in apoptotic process	11/1705	65/16374	0.0711912	0.371429	0.328059	CSNK2A1/DNAJB6/YWHAE/DDX3X/AKT1/HERPUD1/CRYAB/BEX3/GAS6/LAMTOR5/MT3	11
GO:0060078	regulation of postsynaptic membrane potential	11/1705	65/16374	0.0711912	0.371429	0.328059	GABBR1/BAIAP2/APP/NLGN2/DLG4/SLC8A1/GRIA3/DVL1/GRIN1/RIMS1/RIMS2	11
GO:0000717	nucleotide-excision repair, DNA duplex unwinding	5/1705	22/16374	0.0714625	0.371429	0.328059	DDB1/RBX1/PARP1/UBC/UBB	5
GO:0010596	negative regulation of endothelial cell migration	5/1705	22/16374	0.0714625	0.371429	0.328059	DNAJA4/SLIT2/NR2F2/APOE/ADGRB1	5
GO:0031122	cytoplasmic microtubule organization	5/1705	22/16374	0.0714625	0.371429	0.328059	MAPT/SLK/CHP1/DVL1/STMN3	5
GO:0045861	negative regulation of proteolysis	5/1705	22/16374	0.0714625	0.371429	0.328059	AKT1/CSTB/BAG6/CST3/CAMK2N1	5
GO:0050805	negative regulation of synaptic transmission	5/1705	22/16374	0.0714625	0.371429	0.328059	MAPT/PCDH17/GNAI2/SORCS3/GNAI1	5
GO:0060401	cytosolic calcium ion transport	5/1705	22/16374	0.0714625	0.371429	0.328059	YWHAE/SLC8A1/P2RX7/TMBIM6/GRIN1	5
GO:0090316	positive regulation of intracellular protein transport	5/1705	22/16374	0.0714625	0.371429	0.328059	KIF5B/PCNT/OAZ2/B3GAT3/TENM1	5
GO:0099625	ventricular cardiac muscle cell membrane repolarization	5/1705	22/16374	0.0714625	0.371429	0.328059	AKAP9/WDR1/CACNA2D1/SNTA1/GJA1	5
GO:1903861	positive regulation of dendrite extension	5/1705	22/16374	0.0714625	0.371429	0.328059	SYT1/UNC13A/SYT4/RIMS1/RIMS2	5
GO:0009615	response to virus	18/1705	120/16374	0.0718262	0.372935	0.32939	HNRNPUL1/DDX3X/CREBZF/IFNAR1/ENO1/ODC1/HTRA1/CCT5/IVNS1ABP/CLU/BANF1/GTF2F1/IFITM3/LAMTOR5/STMN1/RPS15A/HSPB1/TPT1	18
GO:0002223	stimulatory C-type lectin receptor signaling pathway	17/1705	112/16374	0.0719175	0.373026	0.32947	PSMC6/PRKACB/PSMB1/PAK1/PSMD3/PSMD7/KRAS/PSMB4/PSMD8/PSMD2/PSMB5/SKP1/PSMA7/PSMA4/PSMB3/RELA/PAK3	17
GO:0050804	modulation of chemical synaptic transmission	8/1705	43/16374	0.073171	0.379138	0.334868	PTPRS/DNM1/NLGN2/PRKAR1B/LRP8/PRKAR2B/TUBB2B/CACNA1B	8
GO:0043085	positive regulation of catalytic activity	12/1705	73/16374	0.0734616	0.380254	0.335854	CTSA/ARF1/AZIN1/TRIM23/GMFB/GTF2F1/B3GAT3/NUPR1/SOD1/GNAS/YWHAB/MT3	12
GO:0007264	small GTPase mediated signal transduction	35/1705	262/16374	0.0740968	0.381972	0.337371	PPP2CB/RAPGEF2/YWHAQ/MYO9B/HACD3/CHN1/CDC42/RALGPS2/SQSTM1/RALBP1/SYNGAP1/GRB2/MFN2/CRKL/DLC1/RHOA/TIMP2/ARHGAP23/HMOX1/RRAGC/GDI1/SLIT2/DOCK9/CSF1/RAC1/RAPGEF4/DAB1/CHP1/RIT2/ARHGAP44/DOCK5/RAP1GAP/NRG1/ARHGDIA/RASGRF2	35
GO:0002437	inflammatory response to antigenic stimulus	6/1705	29/16374	0.0744968	0.381972	0.337371	SELENOS/PARK7/PSMB4/CNR1/PNMA1/CD81	6
GO:0048873	homeostasis of number of cells within a tissue	6/1705	29/16374	0.0744968	0.381972	0.337371	PTPN11/KRAS/P2RX7/CSF1/SOX9/BAX	6
GO:0070252	actin-mediated cell contraction	6/1705	29/16374	0.0744968	0.381972	0.337371	ATP1A2/CACNA2D1/PDE4D/SCN1A/ATP1A1/FGF12	6
GO:0086003	cardiac muscle cell contraction	6/1705	29/16374	0.0744968	0.381972	0.337371	ATP1A2/CACNA2D1/PDE4D/SCN1A/ATP1A1/FGF12	6
GO:2000145	regulation of cell motility	6/1705	29/16374	0.0744968	0.381972	0.337371	INPP5F/PKN1/RHOA/SSX2IP/CADM4/NRG1	6
GO:0006821	chloride transport	7/1705	36/16374	0.0746252	0.381972	0.337371	SLC4A10/TTYH3/ANO8/TTYH1/CLCN4/CA2/ANO4	7
GO:0032467	positive regulation of cytokinesis	7/1705	36/16374	0.0746252	0.381972	0.337371	CDC42/KIF3B/GIPC1/RHOA/CDC25B/CENPV/CIT	7
GO:0033572	transferrin transport	7/1705	36/16374	0.0746252	0.381972	0.337371	CLTC/ATP6V1B2/ATP6V1G1/ATP6V0D1/RAB11B/ATP6V0B/ATP6AP1	7
GO:0043434	response to peptide hormone	7/1705	36/16374	0.0746252	0.381972	0.337371	DAG1/BSG/GJA1/TIMP1/SPARC/GNAI1/PHB	7
GO:1904646	cellular response to amyloid-beta	7/1705	36/16374	0.0746252	0.381972	0.337371	BACE1/APP/CACNA2D1/LGMN/PARP1/EPHA4/PRNP	7
GO:0030520	intracellular estrogen receptor signaling pathway	10/1705	58/16374	0.0748899	0.382327	0.337685	DDX17/DDX5/UFM1/WBP2/DDRGK1/TAF7/PAK1/TADA3/PARP1/PHB2	10
GO:0006338	chromatin remodeling	13/1705	81/16374	0.0750339	0.382327	0.337685	ATRX/SMARCA5/HDAC2/ZBTB7A/SMARCD3/PAK1/KAT2A/CBX3/DMAP1/HDAC5/RUVBL2/SOX9/PIH1D1	13
GO:0030073	insulin secretion	27/1705	195/16374	0.0760067	0.382327	0.337685	KIF5B/PPP3CB/PTPN11/STXBP3/MIDN/HMGN3/PARK7/NLGN2/GLUL/PFKL/BRSK2/HMGCR/RAC1/RAPGEF4/GJA1/SOX4/CNR1/EPHA5/MYRIP/SLC25A6/PHPT1/ADCY5/VGF/CACNA1E/RIMS2/SLC25A4/STXBP5L	27
GO:0051146	striated muscle cell differentiation	14/1705	89/16374	0.0760559	0.382327	0.337685	HNRNPU/MORF4L2/DMPK/MTPN/AKT1/KAT2A/BHLHE41/KRAS/YBX1/SGCB/SLC8A1/HDAC5/EFNB2/NRG1	14
GO:0007156	homophilic cell adhesion via plasma membrane adhesion molecules	19/1705	129/16374	0.0760864	0.382327	0.337685	PCDH17/PLXNB2/NPTN/CLSTN1/PTPN23/PCDH19/PCDH10/FAT4/DSCAM/TRO/PTPRT/PCDH7/CLSTN3/TENM3/PCDH11X/PCDH11Y/PCDH15/CLSTN2/CADM3	19
GO:0006636	unsaturated fatty acid biosynthetic process	4/1705	16/16374	0.0770892	0.382327	0.337685	DEGS1/FADS1/FADS2/SCD	4
GO:0006891	intra-Golgi vesicle-mediated transport	4/1705	16/16374	0.0770892	0.382327	0.337685	GOLGA3/COPZ1/GABARAPL2/COPE	4
GO:0006984	ER-nucleus signaling pathway	4/1705	16/16374	0.0770892	0.382327	0.337685	PPP1R15B/ATP2A2/PPP1R15A/HSPA5	4
GO:0030033	microvillus assembly	4/1705	16/16374	0.0770892	0.382327	0.337685	RAPGEF2/EZR/RAP2A/RAP1GAP	4
GO:0032270	positive regulation of cellular protein metabolic process	4/1705	16/16374	0.0770892	0.382327	0.337685	AKT1/EIF4G1/CSF1/NFKBIA	4
GO:0036124	histone H3-K9 trimethylation	4/1705	16/16374	0.0770892	0.382327	0.337685	ATRX/LMNA/ARID4A/PIH1D1	4
GO:1903146	regulation of autophagy of mitochondrion	4/1705	16/16374	0.0770892	0.382327	0.337685	BNIP3L/VDAC1/ATP13A2/PINK1	4
GO:0002091	negative regulation of receptor internalization	3/1705	10/16374	0.077419	0.382327	0.337685	SDCBP/DLG4/LRPAP1	3
GO:0006930	substrate-dependent cell migration, cell extension	3/1705	10/16374	0.077419	0.382327	0.337685	NRP1/SDCBP/SHTN1	3
GO:0030203	glycosaminoglycan metabolic process	3/1705	10/16374	0.077419	0.382327	0.337685	B3GAT2/B3GAT1/B3GAT3	3
GO:0042304	regulation of fatty acid biosynthetic process	3/1705	10/16374	0.077419	0.382327	0.337685	PRKAB2/PDK4/ADIPOR1	3
GO:0042761	very long-chain fatty acid biosynthetic process	3/1705	10/16374	0.077419	0.382327	0.337685	HACD3/HACD2/TECR	3
GO:0045637	regulation of myeloid cell differentiation	3/1705	10/16374	0.077419	0.382327	0.337685	PURB/RNF41/PRKCB	3
GO:0045657	positive regulation of monocyte differentiation	3/1705	10/16374	0.077419	0.382327	0.337685	ZFP36L1/JUN/CSF1	3
GO:0048755	branching morphogenesis of a nerve	3/1705	10/16374	0.077419	0.382327	0.337685	FGFR2/RTN4/EPHA7	3
GO:0051169	nuclear transport	3/1705	10/16374	0.077419	0.382327	0.337685	PSIP1/PPP1CC/BANF1	3
GO:0051651	maintenance of location in cell	3/1705	10/16374	0.077419	0.382327	0.337685	AP3D1/APOE/SLC25A23	3
GO:0051901	positive regulation of mitochondrial depolarization	3/1705	10/16374	0.077419	0.382327	0.337685	RACK1/P2RX7/PARP1	3
GO:0060009	Sertoli cell development	3/1705	10/16374	0.077419	0.382327	0.337685	ATRX/SOX9/CST3	3
GO:0060213	positive regulation of nuclear-transcribed mRNA poly(A) tail shortening	3/1705	10/16374	0.077419	0.382327	0.337685	PABPC1/CPEB3/TOB1	3
GO:0061951	establishment of protein localization to plasma membrane	3/1705	10/16374	0.077419	0.382327	0.337685	ACSL3/RACK1/CSK	3
GO:0071331	cellular response to hexose stimulus	3/1705	10/16374	0.077419	0.382327	0.337685	SELENOT/PTPRN2/RAB11B	3
GO:0072384	organelle transport along microtubule	3/1705	10/16374	0.077419	0.382327	0.337685	LAMP1/CDC42/KIF3C	3
GO:0072697	protein localization to cell cortex	3/1705	10/16374	0.077419	0.382327	0.337685	EZR/NUMA1/GNAI1	3
GO:0090557	establishment of endothelial intestinal barrier	3/1705	10/16374	0.077419	0.382327	0.337685	RAPGEF2/PTPRS/FASN	3
GO:0099509	regulation of presynaptic cytosolic calcium ion concentration	3/1705	10/16374	0.077419	0.382327	0.337685	NCS1/ATP2B2/ATP2B1	3
GO:1901030	positive regulation of mitochondrial outer membrane permeabilization involved in apoptotic signaling pathway	3/1705	10/16374	0.077419	0.382327	0.337685	CHCHD10/BAX/ATP5IF1	3
GO:1903265	positive regulation of tumor necrosis factor-mediated signaling pathway	3/1705	10/16374	0.077419	0.382327	0.337685	CPNE1/HSPA1B/HSPA1A	3
GO:1904996	positive regulation of leukocyte adhesion to vascular endothelial cell	3/1705	10/16374	0.077419	0.382327	0.337685	RHOA/RELA/IRAK1	3
GO:1990535	neuron projection maintenance	3/1705	10/16374	0.077419	0.382327	0.337685	APP/MAP1A/PRNP	3
GO:2001028	positive regulation of endothelial cell chemotaxis	3/1705	10/16374	0.077419	0.382327	0.337685	LGMN/HSPB1/TMSB4X	3
GO:0045860	positive regulation of protein kinase activity	9/1705	51/16374	0.0784497	0.387039	0.341847	RAPGEF2/DAG1/XRCC6/CDC25B/CSF1/JTB/DAB1/RASSF2/GAS6	9
GO:0035725	sodium ion transmembrane transport	12/1705	74/16374	0.0797737	0.393187	0.347277	SLC3A2/ARF1/SNTA1/SLC8A1/ATP1B1/NALCN/ATP1B2/SCN9A/SLC24A2/HCN1/ASIC2/FGF12	12
GO:0001505	regulation of neurotransmitter levels	8/1705	44/16374	0.0816606	0.398042	0.351564	DNAJC5/GABRA2/P2RX7/SYT11/KCNMB4/UNC13A/DVL1/RIMS1	8
GO:0046209	nitric oxide metabolic process	10/1705	59/16374	0.08217	0.398042	0.351564	HSP90AA1/CD47/SELENOS/DDAH2/AKT1/CLU/SIRPA/KHSRP/RAC1/HSP90AB1	10
GO:0035335	peptidyl-tyrosine dephosphorylation	15/1705	98/16374	0.0822009	0.398042	0.351564	PTPN11/PTPRS/PTPRF/HACD2/PTPN23/DNAJC6/PGP/CDC25B/MTMR6/DUSP3/PTPRN2/PTPRT/PTPRO/PTP4A1/PTPRD	15
GO:0051674	localization of cell	5/1705	23/16374	0.0838254	0.398042	0.351564	RAC1/IER2/ITGB4/ELMO1/ACTB	5
GO:2000179	positive regulation of neural precursor cell proliferation	5/1705	23/16374	0.0838254	0.398042	0.351564	NAP1L1/ADGRG1/FLNA/GNAI2/NES	5
GO:2000378	negative regulation of reactive oxygen species metabolic process	5/1705	23/16374	0.0838254	0.398042	0.351564	VDAC1/CRYAB/BNIP3/PINK1/MT3	5
GO:0006656	phosphatidylcholine biosynthetic process	7/1705	37/16374	0.0841606	0.398042	0.351564	CSNK2A1/SLC44A2/ACSL3/LPCAT1/SLC44A1/FABP5/STARD7	7
GO:2001244	positive regulation of intrinsic apoptotic signaling pathway	7/1705	37/16374	0.0841606	0.398042	0.351564	BCLAF1/DDIT3/RACK1/BAX/BCAP31/NUPR1/FIS1	7
GO:0032092	positive regulation of protein binding	11/1705	67/16374	0.0847316	0.398042	0.351564	RAPGEF2/APP/RFNG/DERL1/HERPUD1/ADD2/PIN1/RPL11/HSP90AB1/B2M/RAN	11
GO:0043278	response to morphine	6/1705	30/16374	0.085299	0.398042	0.351564	GNAO1/GOT2/RELA/CNR1/GRIN1/PEA15	6
GO:0045010	actin nucleation	6/1705	30/16374	0.085299	0.398042	0.351564	ABI2/ARF1/GSN/WASF1/BRK1/PICK1	6
GO:0071108	protein K48-linked deubiquitination	6/1705	30/16374	0.085299	0.398042	0.351564	USP7/PARK7/VCPIP1/OTUB1/UBXN1/USP5	6
GO:0071353	cellular response to interleukin-4	6/1705	30/16374	0.085299	0.398042	0.351564	KEAP1/FASN/HSP90AB1/HSPA5/IMPDH2/RPS2	6
GO:0071346	cellular response to interferon-gamma	19/1705	131/16374	0.0857473	0.398042	0.351564	KIF5B/STXBP3/CD47/ACTR2/SYNCRIP/HLA-E/TRIM8/STXBP1/SIRPA/GSN/PDE12/HLA-A/VAMP3/AQP4/MT2A/CDC42EP4/VIM/B2M/CAMK2B	19
GO:0043112	receptor metabolic process	12/1705	75/16374	0.0864177	0.398042	0.351564	INPP5F/LAMTOR1/ARF1/HDAC2/SDCBP/DLG4/CHMP5/LRPAP1/VAMP3/CD63/OPTN/PICK1	12
GO:0034644	cellular response to UV	9/1705	52/16374	0.0865394	0.398042	0.351564	NPM1/YY1/NOC2L/ATF4/PARP1/RUVBL2/COPS9/BAX/RPL26	9
GO:0051899	membrane depolarization	9/1705	52/16374	0.0865394	0.398042	0.351564	RACK1/PARK7/JUN/FHL1/P2RX7/PARP1/CACNA1E/FGF12/CACNA1B	9
GO:0008016	regulation of heart contraction	13/1705	83/16374	0.0874328	0.398042	0.351564	TPM1/DMPK/GNAO1/ATP1A2/ATP2A2/SLC8A1/ATP2B2/ATP2B1/ATP1B1/ATP1B2/ATP1A1/THRA/CACNA1B	13
GO:0000492	box C/D snoRNP assembly	2/1705	5/16374	0.0875345	0.398042	0.351564	SNU13/PIH1D1	2
GO:0001919	regulation of receptor recycling	2/1705	5/16374	0.0875345	0.398042	0.351564	LAMTOR1/CHMP5	2
GO:0003211	cardiac ventricle formation	2/1705	5/16374	0.0875345	0.398042	0.351564	SOX4/SOX11	2
GO:0006356	regulation of transcription by RNA polymerase I	2/1705	5/16374	0.0875345	0.398042	0.351564	UBTF/POLR2L	2
GO:0006403	RNA localization	2/1705	5/16374	0.0875345	0.398042	0.351564	ZFP36L1/YY1	2
GO:0006658	phosphatidylserine metabolic process	2/1705	5/16374	0.0875345	0.398042	0.351564	SERINC3/SERINC1	2
GO:0007021	tubulin complex assembly	2/1705	5/16374	0.0875345	0.398042	0.351564	TCP1/CRYAB	2
GO:0007164	establishment of tissue polarity	2/1705	5/16374	0.0875345	0.398042	0.351564	BRSK2/BRSK1	2
GO:0008038	neuron recognition	2/1705	5/16374	0.0875345	0.398042	0.351564	CNTNAP2/OPCML	2
GO:0010265	SCF complex assembly	2/1705	5/16374	0.0875345	0.398042	0.351564	RBX1/SKP1	2
GO:0010829	negative regulation of glucose transmembrane transport	2/1705	5/16374	0.0875345	0.398042	0.351564	FABP5/PRKCB	2
GO:0010830	regulation of myotube differentiation	2/1705	5/16374	0.0875345	0.398042	0.351564	DMPK/HDAC5	2
GO:0014074	response to purine-containing compound	2/1705	5/16374	0.0875345	0.398042	0.351564	SLC6A1/HMGCS1	2
GO:0014905	myoblast fusion involved in skeletal muscle regeneration	2/1705	5/16374	0.0875345	0.398042	0.351564	CD9/CD81	2
GO:0015846	polyamine transport	2/1705	5/16374	0.0875345	0.398042	0.351564	AZIN1/OAZ2	2
GO:0015917	aminophospholipid transport	2/1705	5/16374	0.0875345	0.398042	0.351564	SCARB2/TMEM30A	2
GO:0016191	synaptic vesicle uncoating	2/1705	5/16374	0.0875345	0.398042	0.351564	SYNJ1/DNAJC6	2
GO:0021781	glial cell fate commitment	2/1705	5/16374	0.0875345	0.398042	0.351564	NFE2L1/NRG1	2
GO:0022898	regulation of transmembrane transporter activity	2/1705	5/16374	0.0875345	0.398042	0.351564	GJA1/ACTB	2
GO:0030091	protein repair	2/1705	5/16374	0.0875345	0.398042	0.351564	PCMT1/MSRB2	2
GO:0032269	negative regulation of cellular protein metabolic process	2/1705	5/16374	0.0875345	0.398042	0.351564	EDNRB/APOE	2
GO:0032482	Rab protein signal transduction	2/1705	5/16374	0.0875345	0.398042	0.351564	GDI1/MADD	2
GO:0033081	regulation of T cell differentiation in thymus	2/1705	5/16374	0.0875345	0.398042	0.351564	CLPTM1/SOD1	2
GO:0035617	stress granule disassembly	2/1705	5/16374	0.0875345	0.398042	0.351564	KIF5B/KLC1	2
GO:0035694	mitochondrial protein catabolic process	2/1705	5/16374	0.0875345	0.398042	0.351564	BNIP3L/BNIP3	2
GO:0036091	positive regulation of transcription from RNA polymerase II promoter in response to oxidative stress	2/1705	5/16374	0.0875345	0.398042	0.351564	ATF4/MT3	2
GO:0036211	protein modification process	2/1705	5/16374	0.0875345	0.398042	0.351564	PARP1/NUPR1	2
GO:0040020	regulation of meiotic nuclear division	2/1705	5/16374	0.0875345	0.398042	0.351564	FZR1/CALR	2
GO:0042180	cellular ketone metabolic process	2/1705	5/16374	0.0875345	0.398042	0.351564	NMT1/PDK4	2
GO:0042989	sequestering of actin monomers	2/1705	5/16374	0.0875345	0.398042	0.351564	GSN/TMSB4X	2
GO:0043045	DNA methylation involved in embryo development	2/1705	5/16374	0.0875345	0.398042	0.351564	PICK1/TRIM28	2
GO:0043949	regulation of cAMP-mediated signaling	2/1705	5/16374	0.0875345	0.398042	0.351564	PEX5L/GNAI1	2
GO:0044070	regulation of anion transport	2/1705	5/16374	0.0875345	0.398042	0.351564	RAB11B/CA2	2
GO:0044791	positive regulation by host of viral release from host cell	2/1705	5/16374	0.0875345	0.398042	0.351564	VAPA/SMC3	2
GO:0045920	negative regulation of exocytosis	2/1705	5/16374	0.0875345	0.398042	0.351564	STXBP6/IL1RAPL1	2
GO:0046813	receptor-mediated virion attachment to host cell	2/1705	5/16374	0.0875345	0.398042	0.351564	GAS6/CD81	2
GO:0051823	regulation of synapse structural plasticity	2/1705	5/16374	0.0875345	0.398042	0.351564	DMPK/CAMK2B	2
GO:0051937	catecholamine transport	2/1705	5/16374	0.0875345	0.398042	0.351564	GRK2/SYT4	2
GO:0060296	regulation of cilium beat frequency involved in ciliary motility	2/1705	5/16374	0.0875345	0.398042	0.351564	CFAP20/CCSAP	2
GO:0060666	dichotomous subdivision of terminal units involved in salivary gland branching	2/1705	5/16374	0.0875345	0.398042	0.351564	NRP1/SEMA3C	2
GO:0060973	cell migration involved in heart development	2/1705	5/16374	0.0875345	0.398042	0.351564	SEMA3C/NDRG4	2
GO:0070169	positive regulation of biomineral tissue development	2/1705	5/16374	0.0875345	0.398042	0.351564	ATF4/CEBPB	2
GO:0071205	protein localization to juxtaparanode region of axon	2/1705	5/16374	0.0875345	0.398042	0.351564	EPB41L3/CNTNAP2	2
GO:0071500	cellular response to nitrosative stress	2/1705	5/16374	0.0875345	0.398042	0.351564	PARK7/DNAJA1	2
GO:0071504	cellular response to heparin	2/1705	5/16374	0.0875345	0.398042	0.351564	SLIT2/SOX9	2
GO:0071895	odontoblast differentiation	2/1705	5/16374	0.0875345	0.398042	0.351564	FAM20C/CEBPB	2
GO:0072656	maintenance of protein location in mitochondrion	2/1705	5/16374	0.0875345	0.398042	0.351564	AKT1/PINK1	2
GO:0072683	T cell extravasation	2/1705	5/16374	0.0875345	0.398042	0.351564	CRK/CRKL	2
GO:0075044	positive regulation by symbiont of host autophagy	2/1705	5/16374	0.0875345	0.398042	0.351564	ULK2/ULK1	2
GO:0090235	regulation of metaphase plate congression	2/1705	5/16374	0.0875345	0.398042	0.351564	DYNC1H1/NUMA1	2
GO:0090324	negative regulation of oxidative phosphorylation	2/1705	5/16374	0.0875345	0.398042	0.351564	RHOA/PDE12	2
GO:0090594	inflammatory response to wounding	2/1705	5/16374	0.0875345	0.398042	0.351564	HMOX1/GRN	2
GO:0097368	establishment of Sertoli cell barrier	2/1705	5/16374	0.0875345	0.398042	0.351564	ARID4A/FLNA	2
GO:0098779	positive regulation of mitophagy in response to mitochondrial depolarization	2/1705	5/16374	0.0875345	0.398042	0.351564	TOMM7/PINK1	2
GO:1900180	regulation of protein localization to nucleus	2/1705	5/16374	0.0875345	0.398042	0.351564	LMNA/PIN1	2
GO:1900222	negative regulation of amyloid-beta clearance	2/1705	5/16374	0.0875345	0.398042	0.351564	LRPAP1/HMGCR	2
GO:1900452	regulation of long-term synaptic depression	2/1705	5/16374	0.0875345	0.398042	0.351564	MAPT/SORCS3	2
GO:1901164	negative regulation of trophoblast cell migration	2/1705	5/16374	0.0875345	0.398042	0.351564	TIMP1/CALR	2
GO:1903202	negative regulation of oxidative stress-induced cell death	2/1705	5/16374	0.0875345	0.398042	0.351564	PARK7/PINK1	2
GO:1903721	positive regulation of I-kappaB phosphorylation	2/1705	5/16374	0.0875345	0.398042	0.351564	DDRGK1/AKT1	2
GO:1903898	negative regulation of PERK-mediated unfolded protein response	2/1705	5/16374	0.0875345	0.398042	0.351564	PPP1R15B/PPP1R15A	2
GO:1904428	negative regulation of tubulin deacetylation	2/1705	5/16374	0.0875345	0.398042	0.351564	MAPT/BEX4	2
GO:1904778	positive regulation of protein localization to cell cortex	2/1705	5/16374	0.0875345	0.398042	0.351564	NUMA1/GNAI1	2
GO:1905832	positive regulation of spindle assembly	2/1705	5/16374	0.0875345	0.398042	0.351564	DYNC1H1/NUMA1	2
GO:1990264	peptidyl-tyrosine dephosphorylation involved in inactivation of protein kinase activity	2/1705	5/16374	0.0875345	0.398042	0.351564	DUSP3/PTPRT	2
GO:2000052	positive regulation of non-canonical Wnt signaling pathway	2/1705	5/16374	0.0875345	0.398042	0.351564	CSNK1D/CSNK1E	2
GO:2000402	negative regulation of lymphocyte migration	2/1705	5/16374	0.0875345	0.398042	0.351564	MIA3/AKT1	2
GO:2001014	regulation of skeletal muscle cell differentiation	2/1705	5/16374	0.0875345	0.398042	0.351564	DDX17/DDX5	2
GO:0018107	peptidyl-threonine phosphorylation	14/1705	91/16374	0.0879274	0.399469	0.352825	CSNK2A1/MAPK1/WNK1/CLK1/APP/AKT1/ULK1/EIF4G1/MAP3K10/CADM4/GRK2/CALM3/DDIT4/CALM1	14
GO:0010631	epithelial cell migration	21/1705	148/16374	0.0884091	0.401296	0.354439	MAPRE2/STRAP/NRP1/IQSEC1/PKN1/PTPN23/GLUL/JUN/DNAJA4/SLIT2/NR2F2/APOE/ADIPOR1/SOX9/RTN4/SPARC/EMC10/GRN/DOCK5/ADGRB1/CALR	21
GO:0019058	viral life cycle	24/1705	173/16374	0.0886024	0.401813	0.354895	SCARB2/KPNB1/RANBP2/LAMP1/DAG1/CTBP1/CHMP5/VPS28/PPIA/APOE/EFNB2/GRK2/HSPA1B/HSP90AB1/GAS6/LAMTOR5/UBC/RAN/CTSB/UBB/HSPA1A/RPSA/CXADR/CD81	24
GO:0046847	filopodium assembly	10/1705	60/16374	0.089868	0.407187	0.359642	FNBP1L/DPYSL3/EZR/CDC42/ITGA6/NRP1/PALM/TTYH1/TENM2/TENM1	10
GO:0035592	establishment of protein localization to extracellular region	11/1705	68/16374	0.0920576	0.415457	0.366946	EZR/ARF1/ERP29/HMGCR/PPIA/APOE/ATP13A2/APBB1/FRMD4A/SYT4/SRCIN1	11
GO:1902036	regulation of hematopoietic stem cell differentiation	11/1705	68/16374	0.0920576	0.415457	0.366946	PSMC6/PSMB1/PSMD3/PSMD7/PSMB4/PSMD8/PSMD2/PSMB5/PSMA7/PSMA4/PSMB3	11
GO:0007194	negative regulation of adenylate cyclase activity	4/1705	17/16374	0.0928446	0.415457	0.366946	AKAP9/GRM3/GNAI2/EDNRB	4
GO:0008347	glial cell migration	4/1705	17/16374	0.0928446	0.415457	0.366946	CRKL/IDH2/CSF1/EPHA4	4
GO:0009605	response to external stimulus	4/1705	17/16374	0.0928446	0.415457	0.366946	CHD8/BACE1/DVL1/GRIN1	4
GO:0017157	regulation of exocytosis	4/1705	17/16374	0.0928446	0.415457	0.366946	RAB21/RAPGEF4/SYT1/RIMS2	4
GO:0032930	positive regulation of superoxide anion generation	4/1705	17/16374	0.0928446	0.415457	0.366946	MAPT/GNAI2/GSTP1/SOD1	4
GO:0043330	response to exogenous dsRNA	4/1705	17/16374	0.0928446	0.415457	0.366946	SLC3A2/MAPK1/DDX21/NFKBIA	4
GO:0043408	regulation of MAPK cascade	4/1705	17/16374	0.0928446	0.415457	0.366946	SYNGAP1/GRB2/RNF41/ATP6AP2	4
GO:0045109	intermediate filament organization	4/1705	17/16374	0.0928446	0.415457	0.366946	DNAJB6/KLHL24/VIM/GFAP	4
GO:0060080	inhibitory postsynaptic potential	4/1705	17/16374	0.0928446	0.415457	0.366946	NLGN2/RIMS1/RIMS2/GABRB3	4
GO:0060713	labyrinthine layer morphogenesis	4/1705	17/16374	0.0928446	0.415457	0.366946	DNAJB6/ZFP36L1/GRB2/FGFR2	4
GO:1990126	retrograde transport, endosome to plasma membrane	4/1705	17/16374	0.0928446	0.415457	0.366946	SNX27/VPS35/ANKRD50/RAB11B	4
GO:2000010	positive regulation of protein localization to cell surface	4/1705	17/16374	0.0928446	0.415457	0.366946	AKT1/STX3/HSP90AB1/MAP1A	4
GO:0035264	multicellular organism growth	21/1705	149/16374	0.0933072	0.417158	0.368448	ATRX/PTPN11/RBBP6/EZR/ZFP36L1/NDUFS6/APP/SLC4A10/FGFR2/PDE4D/KAT2A/LGMN/PPIB/CSF1/TMED2/UNC79/H3F3B/CTC1/SOD1/GNAS/FKBP8	21
GO:0040007	growth	14/1705	92/16374	0.0942772	0.42037	0.371286	MORF4L2/MORF4L1/HEPACAM/DMAP1/TKT/MCTS1/PPP2R1A/RUVBL2/MT2A/GAS6/CSPG5/MT1X/MT1E/AES	14
GO:0043149	stress fiber assembly	14/1705	92/16374	0.0942772	0.42037	0.371286	FAM171A1/TPM1/CD47/PPM1E/CDC42/NRP1/DLC1/PAK1/RHOA/RAC1/TNFAIP1/BAG4/S100A10/STMN1	14
GO:0007032	endosome organization	7/1705	38/16374	0.0943586	0.42037	0.371286	SCARB2/LAMTOR1/SYNJ1/SQSTM1/DNM1/LAPTM4B/SNX10	7
GO:0072676	lymphocyte migration	7/1705	38/16374	0.0943586	0.42037	0.371286	MIA3/CRK/APP/CRKL/AKT1/RHOA/SELENOK	7
GO:0001508	action potential	9/1705	53/16374	0.0951066	0.422584	0.373241	YWHAE/ATP1A2/SLC8A1/ATP1B1/KCNMB4/CNR1/ATP1A1/YWHAH/FGF12	9
GO:0007611	learning or memory	9/1705	53/16374	0.0951066	0.422584	0.373241	MAPK1/APP/GATM/PRKAR1B/TMOD2/S100B/GRIN2A/THRA/PRNP	9
GO:1903779	regulation of cardiac conduction	9/1705	53/16374	0.0951066	0.422584	0.373241	DMPK/ATP1A2/ATP2A2/SLC8A1/ATP2B2/ATP2B1/ATP1B1/ATP1B2/ATP1A1	9
GO:0006378	mRNA polyadenylation	6/1705	31/16374	0.0969141	0.424563	0.374989	PAPOLA/PABPC1/APP/SSU72/CPEB3/GRSF1	6
GO:0008089	anterograde axonal transport	6/1705	31/16374	0.0969141	0.424563	0.374989	RAB21/AP3D1/KIF3B/SOD1/KIF1A/ARL8A	6
GO:0070423	nucleotide-binding oligomerization domain containing signaling pathway	6/1705	31/16374	0.0969141	0.424563	0.374989	UBE2N/HSPA1B/IRAK1/UBC/UBB/HSPA1A	6
GO:0001678	cellular glucose homeostasis	5/1705	24/16374	0.0972349	0.424563	0.374989	NUCKS1/STXBP3/SELENOT/PTPRN2/RAB11B	5
GO:0008652	cellular amino acid biosynthetic process	5/1705	24/16374	0.0972349	0.424563	0.374989	GLS/OAT/GLUL/GOT2/NAT8L	5
GO:0042743	hydrogen peroxide metabolic process	5/1705	24/16374	0.0972349	0.424563	0.374989	PARK7/MT-CO2/RAC1/PINK1/MT3	5
GO:0045595	regulation of cell differentiation	5/1705	24/16374	0.0972349	0.424563	0.374989	PTBP3/EID1/PPP2R1A/FADS1/SPOCK2	5
GO:0061025	membrane fusion	5/1705	24/16374	0.0972349	0.424563	0.374989	VAPA/YKT6/VAMP3/CHP1/RIMS1	5
GO:0097191	extrinsic apoptotic signaling pathway	24/1705	175/16374	0.0977771	0.424563	0.374989	LMNA/TNFRSF1A/ITGA6/NRP1/PDIA3/SKIL/PARK7/AKT1/HIPK1/HMOX1/PPP2R1A/P2RX7/RNF41/MADD/TMBIM1/GSTP1/BAX/RELA/HSPA1B/PAK5/FEM1B/SCG2/PEA15/HSPA1A	24
GO:0042310	vasoconstriction	10/1705	61/16374	0.0979835	0.424563	0.374989	ATP1A2/AKT1/RHOA/ATP2B1/EDNRB/KCNMB4/GJA1/DOCK5/CHRM3/ASIC2	10
GO:0045669	positive regulation of osteoblast differentiation	10/1705	61/16374	0.0979835	0.424563	0.374989	FAM20C/IL6ST/CEBPD/ACVR2A/ID4/GJA1/CEBPB/GNAS/SOX11/ATP6AP1	10
GO:0009048	dosage compensation by inactivation of X chromosome	3/1705	11/16374	0.0984932	0.424563	0.374989	HNRNPU/RBM15/EIF1	3
GO:0015800	acidic amino acid transport	3/1705	11/16374	0.0984932	0.424563	0.374989	P2RX7/SYT4/GRM7	3
GO:0018119	peptidyl-cysteine S-nitrosylation	3/1705	11/16374	0.0984932	0.424563	0.374989	NCOA7/OXR1/SNTA1	3
GO:0021602	cranial nerve morphogenesis	3/1705	11/16374	0.0984932	0.424563	0.374989	NRP1/PLXNA3/PLXNA4	3
GO:0021610	facial nerve morphogenesis	3/1705	11/16374	0.0984932	0.424563	0.374989	NRP1/PLXNA3/PLXNA4	3
GO:0031581	hemidesmosome assembly	3/1705	11/16374	0.0984932	0.424563	0.374989	ITGA6/PLEC/ITGB4	3
GO:0033148	positive regulation of intracellular estrogen receptor signaling pathway	3/1705	11/16374	0.0984932	0.424563	0.374989	WBP2/PAK1/PARP1	3
GO:0034379	very-low-density lipoprotein particle assembly	3/1705	11/16374	0.0984932	0.424563	0.374989	ACSL3/ARF1/P4HB	3
GO:0034629	cellular protein-containing complex localization	3/1705	11/16374	0.0984932	0.424563	0.374989	EZR/NACC2/RAN	3
GO:0044321	response to leptin	3/1705	11/16374	0.0984932	0.424563	0.374989	UGCG/ADIPOR1/MT3	3
GO:0048711	positive regulation of astrocyte differentiation	3/1705	11/16374	0.0984932	0.424563	0.374989	IL6ST/PRPF19/ID2	3
GO:0051453	regulation of intracellular pH	3/1705	11/16374	0.0984932	0.424563	0.374989	CHP1/CA2/ATP5F1B	3
GO:0060221	retinal rod cell differentiation	3/1705	11/16374	0.0984932	0.424563	0.374989	NTRK2/TOPORS/SOX9	3
GO:0070977	bone maturation	3/1705	11/16374	0.0984932	0.424563	0.374989	RHOA/SEMA4D/FAT4	3
GO:0071679	commissural neuron axon guidance	3/1705	11/16374	0.0984932	0.424563	0.374989	FZD3/DAG1/NRP1	3
GO:0090042	tubulin deacetylation	3/1705	11/16374	0.0984932	0.424563	0.374989	MAPT/TADA3/BEX4	3
GO:0097205	renal filtration	3/1705	11/16374	0.0984932	0.424563	0.374989	GJA1/PTPRO/GAS6	3
GO:0098659	inorganic cation import across plasma membrane	3/1705	11/16374	0.0984932	0.424563	0.374989	ATP1B1/ATP1B2/PRNP	3
GO:0099151	regulation of postsynaptic density assembly	3/1705	11/16374	0.0984932	0.424563	0.374989	PTPRS/LRFN4/PTPRD	3
GO:1902004	positive regulation of amyloid-beta formation	3/1705	11/16374	0.0984932	0.424563	0.374989	APP/CLU/EPHA4	3
GO:1903428	positive regulation of reactive oxygen species biosynthetic process	3/1705	11/16374	0.0984932	0.424563	0.374989	PARK7/GRIN1/ADGRB1	3
GO:1904322	cellular response to forskolin	3/1705	11/16374	0.0984932	0.424563	0.374989	GNAI1/ADCY1/ADCY5	3
GO:1990089	response to nerve growth factor	3/1705	11/16374	0.0984932	0.424563	0.374989	RAPGEF2/SORT1/KIDINS220	3
GO:2000786	positive regulation of autophagosome assembly	3/1705	11/16374	0.0984932	0.424563	0.374989	ULK1/PIP4K2B/KIAA1324	3
GO:0051260	protein homooligomerization	31/1705	235/16374	0.100007	0.430723	0.38043	DYNC1LI2/DPYSL3/G3BP2/SLC6A1/ANGPTL4/VPS35/NACC2/RACK1/GLUL/ANXA6/ATL1/DERL1/KCTD16/CLU/HMOX1/NACC1/CRYAB/TMEM120A/TNFAIP1/JMJD6/APOE/SYT1/PRMT1/BAX/STOM/KCTD2/MARCKS/FIS1/PRNP/KCNB2/ATP5IF1	31
GO:0006874	cellular calcium ion homeostasis	12/1705	77/16374	0.100706	0.43336	0.382759	TMEM165/DMPK/NPTN/ATF4/ATP1B1/APOE/ATP13A2/CALR/SV2A/TPT1/HSP90B1/PRKCB	12
GO:0071805	potassium ion transmembrane transport	14/1705	93/16374	0.100904	0.433844	0.383186	FLNA/TMEM175/MTMR6/DPP10/ATP1B1/NALCN/ATP1B2/KCNQ2/CD63/KCNMB4/KCNQ5/HCN1/PRNP/KCNB2	14
GO:0030316	osteoclast differentiation	13/1705	85/16374	0.10104	0.434059	0.383376	FAM213A/TOB2/ZNF675/ESRRA/CSF1/SNX10/CEBPB/RASSF2/GNAS/CA2/TMEM178A/JUNB/CD81	13
GO:0000209	protein polyubiquitination	29/1705	219/16374	0.104855	0.450066	0.397515	UBE2B/RBBP6/PSMC6/LNPEP/FBXO21/UBE2V2/NFE2L1/PSMB1/RBX1/MIB2/PSMD3/PSMD7/MKRN1/PSMB4/PSMD8/PSMD2/PSMB5/SKP1/TOPORS/PSMA7/RNF41/PSMA4/FBXW5/PRPF19/STUB1/PSMB3/CDC34/UBC/UBB	29
GO:0006869	lipid transport	10/1705	62/16374	0.106514	0.456801	0.403462	ESYT2/PDZD8/VPS51/APOO/SORL1/SPNS1/LRP10/PLTP/APOE/PSAP	10
GO:0000045	autophagosome assembly	11/1705	70/16374	0.107821	0.461618	0.407718	WIPI2/PACS2/ATG12/WDR45B/MFN2/ULK1/PIP4K2B/FEZ1/NUPR1/KIAA1324/PINK1	11
GO:0031398	positive regulation of protein ubiquitination	11/1705	70/16374	0.107821	0.461618	0.407718	NDFIP1/MYCBP2/PTTG1IP/CDK5RAP3/AIMP2/DERL1/STUB1/FAM107A/HSPA5/PINK1/UBB	11
GO:0016197	endosomal transport	12/1705	78/16374	0.108349	0.463094	0.409021	SNX27/INPP5F/LAMTOR1/SQSTM1/SORL1/CHMP5/VPS28/RAB35/RAB11B/UBC/UBB/NDRG4	12
GO:0030038	contractile actin filament bundle assembly	12/1705	78/16374	0.108349	0.463094	0.409021	TPM1/CD47/PPM1E/CDC42/NRP1/DLC1/PAK1/RHOA/RAC1/BAG4/S100A10/STMN1	12
GO:0032869	cellular response to insulin stimulus	21/1705	152/16374	0.109037	0.465291	0.410962	BAIAP2/ZFP36L1/PRKCI/GRB2/SELENOS/CPEB2/PAK1/AKT1/ATP6V1B2/PDE3B/ATP6V1G1/ESRRA/HDAC5/ATP2B1/PDK4/ATP6V0D1/GSTP1/PARP1/YWHAG/ATP6V0B/ATP6AP1	21
GO:0001975	response to amphetamine	6/1705	32/16374	0.109323	0.465291	0.410962	RANBP2/HDAC2/GRIN2A/SOD1/CALM3/GRIN1	6
GO:0007019	microtubule depolymerization	6/1705	32/16374	0.109323	0.465291	0.410962	KIF2A/HDGFL3/STMN2/FGF13/MAP1B/STMN1	6
GO:0015698	inorganic anion transport	6/1705	32/16374	0.109323	0.465291	0.410962	SLC4A8/VDAC1/LRRC8B/VDAC2/LRRC8A/CA2	6
GO:0045773	positive regulation of axon extension	6/1705	32/16374	0.109323	0.465291	0.410962	MAPT/PAK1/CDKL5/GDI1/MAP1B/SHTN1	6
GO:0006826	iron ion transport	4/1705	18/16374	0.109987	0.465371	0.411032	TTYH1/FTL/FTH1/B2M	4
GO:0006892	post-Golgi vesicle-mediated transport	4/1705	18/16374	0.109987	0.465371	0.411032	SCAMP1/SORL1/SCAMP3/SCAMP2	4
GO:0032011	ARF protein signal transduction	4/1705	18/16374	0.109987	0.465371	0.411032	MAPRE2/IQSEC1/ARFGEF3/PSD	4
GO:0051693	actin filament capping	4/1705	18/16374	0.109987	0.465371	0.411032	SPTAN1/SPTBN1/MTPN/GSN	4
GO:0090174	organelle membrane fusion	4/1705	18/16374	0.109987	0.465371	0.411032	KIF5B/STXBP1/VAMP3/SYT4	4
GO:1903077	negative regulation of protein localization to plasma membrane	4/1705	18/16374	0.109987	0.465371	0.411032	CLTC/TMEM59/TMBIM1/AP2M1	4
GO:1990573	potassium ion import across plasma membrane	4/1705	18/16374	0.109987	0.465371	0.411032	ATP1A2/ATP1B1/ATP1B2/ATP1A1	4
GO:0007265	Ras protein signal transduction	32/1705	246/16374	0.110116	0.465529	0.411171	PPP2CB/MYO9B/GNB1/CRK/G3BP2/ADGRG1/SQSTM1/SYNGAP1/GRB2/MFN2/PARK7/CRKL/DLC1/JUN/SHC2/TIMP2/KRAS/SSX2IP/RALGDS/CSF1/MADD/RAC1/TNFAIP1/CADM4/RIT2/TRIM28/STMN1/NRG1/SHTN1/ARHGDIA/RASGRF2/STMN3	32
GO:0007263	nitric oxide mediated signal transduction	5/1705	25/16374	0.111653	0.470845	0.415867	GUCY1A2/DDAH2/APOE/RASD1/MT2A	5
GO:0021517	ventral spinal cord development	5/1705	25/16374	0.111653	0.470845	0.415867	NFE2L1/LMO4/DAB1/SOX4/MDGA2	5
GO:0055117	regulation of cardiac muscle contraction	5/1705	25/16374	0.111653	0.470845	0.415867	AKAP9/ATP2A2/FGF13/CALM3/CALM1	5
GO:0007017	microtubule-based process	9/1705	55/16374	0.113659	0.478505	0.422633	MAPT/KIFAP3/RHOA/TUBA1C/BICD2/DCTN3/FAM107A/TUBB2B/TUBB	9
GO:0044271	cellular nitrogen compound biosynthetic process	9/1705	55/16374	0.113659	0.478505	0.422633	HSP90AA1/CD47/DDAH2/AKT1/CLU/SIRPA/KHSRP/RAC1/HSP90AB1	9
GO:0007049	cell cycle	56/1705	458/16374	0.1143	0.480803	0.424662	CSNK2A1/SON/MAPK1/HNRNPU/USP22/PTPN11/TXNL4A/ANAPC5/BLCAP/CLTA/C6orf89/EID1/KLHL21/PRKACB/APP/CDK11B/PLA2G16/FGFR2/SDCBP/RASSF4/CTBP1/RACK1/ERH/PPP1R13B/KMT5A/PPP1CC/CDC25B/TIMP2/CDKL5/LGMN/POLDIP2/MCTS1/GNAI2/CHMP1A/MADD/NOP53/DUSP3/KLHL9/BRINP1/RASSF2/NUPR1/FZR1/PIN1/PTP4A1/CENPV/FAM107A/GNAI1/TSPYL2/RPS15A/ARL8A/CALR/HSPA8/BEX2/CCSAP/CAMK2N1/MRPL41	56
GO:0198738	cell-cell signaling by wnt	24/1705	179/16374	0.11791	0.484633	0.428045	CSNK2A1/CHD8/DDB1/CSNK1D/TLE4/SNX3/DDX3X/RTF1/DDIT3/VPS35/NDRG2/RBX1/CALCOCO1/MESD/SKP1/TMEM170B/APC2/DAAM2/CPE/UBC/DKK3/AES/AMER2/UBB	24
GO:0071407	cellular response to organic cyclic compound	15/1705	104/16374	0.120904	0.484633	0.428045	NPM1/TMF1/ITGA6/PGRMC2/AKT1/NR2F1/CLU/ESRRA/NR2F2/CEBPB/INSIG1/HSP90AB1/PAK3/LGALS1/THRA	15
GO:1901701	cellular response to oxygen-containing compound	8/1705	48/16374	0.121135	0.484633	0.428045	MAPK1/MTDH/CRKL/AKT1/CLU/NFKBIA/INSIG1/IRAK1	8
GO:0031669	cellular response to nutrient levels	3/1705	12/16374	0.121572	0.484633	0.428045	ULK1/EIF4G1/FAM107A	3
GO:0031953	negative regulation of protein autophosphorylation	3/1705	12/16374	0.121572	0.484633	0.428045	JUN/MVP/CHP1	3
GO:0032230	positive regulation of synaptic transmission, GABAergic	3/1705	12/16374	0.121572	0.484633	0.428045	KIF5B/NLGN2/CA2	3
GO:0035518	histone H2A monoubiquitination	3/1705	12/16374	0.121572	0.484633	0.428045	DDB1/RING1/SKP1	3
GO:0043931	ossification involved in bone maturation	3/1705	12/16374	0.121572	0.484633	0.428045	RHOA/SEMA4D/FAT4	3
GO:0046325	negative regulation of glucose import	3/1705	12/16374	0.121572	0.484633	0.428045	STXBP3/SELENOS/PEA15	3
GO:0046949	fatty-acyl-CoA biosynthetic process	3/1705	12/16374	0.121572	0.484633	0.428045	PPT1/FASN/SCD	3
GO:0050848	regulation of calcium-mediated signaling	3/1705	12/16374	0.121572	0.484633	0.428045	MAPT/RIT2/SELENOK	3
GO:0051156	glucose 6-phosphate metabolic process	3/1705	12/16374	0.121572	0.484633	0.428045	NFE2L1/TKT/PGAM1	3
GO:0051481	negative regulation of cytosolic calcium ion concentration	3/1705	12/16374	0.121572	0.484633	0.428045	ATP1A2/SLC8A1/ATP2B1	3
GO:0061099	negative regulation of protein tyrosine kinase activity	3/1705	12/16374	0.121572	0.484633	0.428045	RACK1/MVP/SRCIN1	3
GO:0071340	skeletal muscle acetylcholine-gated channel clustering	3/1705	12/16374	0.121572	0.484633	0.428045	CRKL/MESD/DVL1	3
GO:0071888	macrophage apoptotic process	3/1705	12/16374	0.121572	0.484633	0.428045	SELENOS/CTSL/TCP1	3
GO:0072520	seminiferous tubule development	3/1705	12/16374	0.121572	0.484633	0.428045	ATRX/ADGRG1/UBB	3
GO:0098885	modification of postsynaptic actin cytoskeleton	3/1705	12/16374	0.121572	0.484633	0.428045	BAIAP2/RHOA/WASF1	3
GO:0098962	regulation of postsynaptic neurotransmitter receptor activity	3/1705	12/16374	0.121572	0.484633	0.428045	AKAP9/SHISA9/HOMER1	3
GO:0043491	protein kinase B signaling	31/1705	240/16374	0.122046	0.484633	0.428045	MTDH/PTPN11/HSP90AA1/INPP5F/DDIT3/ZFP36L1/F3/SESN3/DAG1/GRB2/TXN/FGFR2/CPNE1/RACK1/PARK7/AKT1/RNF41/RAC1/NOP53/STK11/RPS6KB2/MEIS3/BAG4/SOX9/PHLDA3/RTN4/HSP90AB1/GAS6/NRG1/PINK1/MT3	31
GO:0006606	protein import into nucleus	14/1705	96/16374	0.12244	0.484633	0.428045	MAPK1/KPNB1/LMNA/PTTG1IP/FLNA/AKT1/NOLC1/DMAP1/NFKBIA/PKIA/CHP1/PHB2/TRIM28/RAN	14
GO:0000212	meiotic spindle organization	2/1705	6/16374	0.122453	0.484633	0.428045	ATRX/PPP2R1A	2
GO:0001514	selenocysteine incorporation	2/1705	6/16374	0.122453	0.484633	0.428045	SELENOT/RPL30	2
GO:0001731	formation of translation preinitiation complex	2/1705	6/16374	0.122453	0.484633	0.428045	EIF5/MCTS1	2
GO:0002246	wound healing involved in inflammatory response	2/1705	6/16374	0.122453	0.484633	0.428045	HMOX1/TIMP1	2
GO:0006107	oxaloacetate metabolic process	2/1705	6/16374	0.122453	0.484633	0.428045	GOT2/MDH2	2
GO:0006301	postreplication repair	2/1705	6/16374	0.122453	0.484633	0.428045	UBE2B/UBE2N	2
GO:0007185	transmembrane receptor protein tyrosine phosphatase signaling pathway	2/1705	6/16374	0.122453	0.484633	0.428045	PTPRF/PTPRD	2
GO:0007195	adenylate cyclase-inhibiting dopamine receptor signaling pathway	2/1705	6/16374	0.122453	0.484633	0.428045	FLNA/ADCY5	2
GO:0007196	adenylate cyclase-inhibiting G protein-coupled glutamate receptor signaling pathway	2/1705	6/16374	0.122453	0.484633	0.428045	GRM3/GRM7	2
GO:0008635	activation of cysteine-type endopeptidase activity involved in apoptotic process by cytochrome c	2/1705	6/16374	0.122453	0.484633	0.428045	BAX/CYCS	2
GO:0010035	response to inorganic substance	2/1705	6/16374	0.122453	0.484633	0.428045	MAP1B/EEF1A2	2
GO:0010310	regulation of hydrogen peroxide metabolic process	2/1705	6/16374	0.122453	0.484633	0.428045	RAC1/PINK1	2
GO:0010657	muscle cell apoptotic process	2/1705	6/16374	0.122453	0.484633	0.428045	DMPK/HMOX1	2
GO:0010989	negative regulation of low-density lipoprotein particle clearance	2/1705	6/16374	0.122453	0.484633	0.428045	KHSRP/CSK	2
GO:0015866	ADP transport	2/1705	6/16374	0.122453	0.484633	0.428045	SLC25A6/SLC25A4	2
GO:0030705	cytoskeleton-dependent intracellular transport	2/1705	6/16374	0.122453	0.484633	0.428045	TUBA1C/TUBB	2
GO:0031110	regulation of microtubule polymerization or depolymerization	2/1705	6/16374	0.122453	0.484633	0.428045	MAPT/STMN1	2
GO:0032229	negative regulation of synaptic transmission, GABAergic	2/1705	6/16374	0.122453	0.484633	0.428045	SLC6A1/STXBP1	2
GO:0032675	regulation of interleukin-6 production	2/1705	6/16374	0.122453	0.484633	0.428045	CD47/SIRPA	2
GO:0035520	monoubiquitinated protein deubiquitination	2/1705	6/16374	0.122453	0.484633	0.428045	USP7/USP1	2
GO:0035900	response to isolation stress	2/1705	6/16374	0.122453	0.484633	0.428045	KRAS/LGALS1	2
GO:0038203	TORC2 signaling	2/1705	6/16374	0.122453	0.484633	0.428045	SESN3/PINK1	2
GO:0042256	mature ribosome assembly	2/1705	6/16374	0.122453	0.484633	0.428045	DDX3X/SBDS	2
GO:0044794	positive regulation by host of viral process	2/1705	6/16374	0.122453	0.484633	0.428045	PPIB/APOE	2
GO:0045646	regulation of erythrocyte differentiation	2/1705	6/16374	0.122453	0.484633	0.428045	P4HTM/B2M	2
GO:0051005	negative regulation of lipoprotein lipase activity	2/1705	6/16374	0.122453	0.484633	0.428045	SORT1/ANGPTL4	2
GO:0051155	positive regulation of striated muscle cell differentiation	2/1705	6/16374	0.122453	0.484633	0.428045	MORF4L2/NRG1	2
GO:0051220	cytoplasmic sequestering of protein	2/1705	6/16374	0.122453	0.484633	0.428045	FLNA/YWHAB	2
GO:0051224	negative regulation of protein transport	2/1705	6/16374	0.122453	0.484633	0.428045	NDFIP1/SNX3	2
GO:0051303	establishment of chromosome localization	2/1705	6/16374	0.122453	0.484633	0.428045	DYNC1H1/NUMA1	2
GO:0060136	embryonic process involved in female pregnancy	2/1705	6/16374	0.122453	0.484633	0.428045	ACSL4/JUNB	2
GO:0060390	regulation of SMAD protein signal transduction	2/1705	6/16374	0.122453	0.484633	0.428045	SPTBN1/TOB1	2
GO:0060710	chorio-allantoic fusion	2/1705	6/16374	0.122453	0.484633	0.428045	DNAJB6/ZFP36L1	2
GO:0061000	negative regulation of dendritic spine development	2/1705	6/16374	0.122453	0.484633	0.428045	PTPRS/HDAC2	2
GO:0061518	microglial cell proliferation	2/1705	6/16374	0.122453	0.484633	0.428045	CLU/CSF1	2
GO:0061734	parkin-mediated stimulation of mitophagy in response to mitochondrial depolarization	2/1705	6/16374	0.122453	0.484633	0.428045	MFN2/OPTN	2
GO:0070358	actin polymerization-dependent cell motility	2/1705	6/16374	0.122453	0.484633	0.428045	ARPC2/ARPC3	2
GO:0097187	dentinogenesis	2/1705	6/16374	0.122453	0.484633	0.428045	FAM20C/HTRA1	2
GO:0097264	self proteolysis	2/1705	6/16374	0.122453	0.484633	0.428045	LGMN/CAPN1	2
GO:0097283	keratinocyte apoptotic process	2/1705	6/16374	0.122453	0.484633	0.428045	ZFP36L1/GSN	2
GO:1901016	regulation of potassium ion transmembrane transporter activity	2/1705	6/16374	0.122453	0.484633	0.428045	YWHAE/FHL1	2
GO:1901727	positive regulation of histone deacetylase activity	2/1705	6/16374	0.122453	0.484633	0.428045	C6orf89/PINK1	2
GO:1902389	ceramide 1-phosphate transport	2/1705	6/16374	0.122453	0.484633	0.428045	PLEKHA3/GLTP	2
GO:1903026	negative regulation of RNA polymerase II regulatory region sequence-specific DNA binding	2/1705	6/16374	0.122453	0.484633	0.428045	DDIT3/TMSB4X	2
GO:1905274	regulation of modification of postsynaptic actin cytoskeleton	2/1705	6/16374	0.122453	0.484633	0.428045	BAIAP2/RHOA	2
GO:1990034	calcium ion export across plasma membrane	2/1705	6/16374	0.122453	0.484633	0.428045	YWHAE/ATP2B1	2
GO:1990668	vesicle fusion with endoplasmic reticulum-Golgi intermediate compartment (ERGIC) membrane	2/1705	6/16374	0.122453	0.484633	0.428045	TAPBP/CALR	2
GO:2000404	regulation of T cell migration	2/1705	6/16374	0.122453	0.484633	0.428045	CRK/CRKL	2
GO:2000510	positive regulation of dendritic cell chemotaxis	2/1705	6/16374	0.122453	0.484633	0.428045	GAS6/CALR	2
GO:2001046	positive regulation of integrin-mediated signaling pathway	2/1705	6/16374	0.122453	0.484633	0.428045	FLNA/CD63	2
GO:2001268	negative regulation of cysteine-type endopeptidase activity involved in apoptotic signaling pathway	2/1705	6/16374	0.122453	0.484633	0.428045	PARK7/PIH1D1	2
GO:0001825	blastocyst formation	6/1705	33/16374	0.122501	0.484633	0.428045	RPL7L1/SKIL/MFN2/SF3B6/RTN4/JUNB	6
GO:0006370	7-methylguanosine mRNA capping	6/1705	33/16374	0.122501	0.484633	0.428045	POLR2B/POLR2A/NCBP2/POLR2E/GTF2F1/POLR2L	6
GO:0043928	exonucleolytic catabolism of deadenylated mRNA	6/1705	33/16374	0.122501	0.484633	0.428045	DDX6/LSM5/LSM7/EXOSC6/LSM3/LSM4	6
GO:0060425	lung morphogenesis	6/1705	33/16374	0.122501	0.484633	0.428045	MAPK1/DAG1/FGFR2/KRAS/SOX9/SOX11	6
GO:0030521	androgen receptor signaling pathway	9/1705	56/16374	0.123633	0.488726	0.43166	DDX17/DDX5/ZBTB7A/PARK7/RHOA/FKBP4/NCOA4/PHB/RAN	9
GO:0030307	positive regulation of cell growth	12/1705	80/16374	0.124623	0.492256	0.434778	CSNK2A1/DDX3X/CDC42/EXTL3/SDCBP/MTPN/AKT1/RHOA/EIF4G1/HDGFL2/EIF4G2/H3F3B	12
GO:0008654	phospholipid biosynthetic process	5/1705	26/16374	0.127033	0.499045	0.440774	LPCAT1/PLA2G16/FADS1/MBOAT7/SERINC1	5
GO:0014002	astrocyte development	5/1705	26/16374	0.127033	0.499045	0.440774	MAPT/APP/VIM/PLP1/MT3	5
GO:0039694	viral RNA genome replication	5/1705	26/16374	0.127033	0.499045	0.440774	TOP2B/FAM208A/CDC42/PCBP1/TRIM28	5
GO:0045216	cell-cell junction organization	5/1705	26/16374	0.127033	0.499045	0.440774	MAPRE2/PRKCI/IQSEC1/PTPN23/CXADR	5
GO:0055074	calcium ion homeostasis	5/1705	26/16374	0.127033	0.499045	0.440774	SLC8A1/SNX10/GRIN1/CALR/HSP90B1	5
GO:0070911	global genome nucleotide-excision repair	5/1705	26/16374	0.127033	0.499045	0.440774	DDB1/RBX1/PARP1/UBC/UBB	5
GO:2001234	negative regulation of apoptotic signaling pathway	5/1705	26/16374	0.127033	0.499045	0.440774	CSNK2A1/GNAI2/TMBIM6/MEIS3/BAX	5
GO:0007088	regulation of mitotic nuclear division	4/1705	19/16374	0.128418	0.501753	0.443166	NFE2L1/FBXW5/OBSL1/PIN1	4
GO:0035338	long-chain fatty-acyl-CoA biosynthetic process	4/1705	19/16374	0.128418	0.501753	0.443166	ACSL3/ACSL4/HACD2/TECR	4
GO:0043409	negative regulation of MAPK cascade	4/1705	19/16374	0.128418	0.501753	0.443166	DAG1/P2RX7/DUSP3/GSTP1	4
GO:0046474	glycerophospholipid biosynthetic process	4/1705	19/16374	0.128418	0.501753	0.443166	ACSL3/LPCAT1/CPNE3/CPNE1	4
GO:0046597	negative regulation of viral entry into host cell	4/1705	19/16374	0.128418	0.501753	0.443166	SNX3/TRIM8/GSN/IFITM3	4
GO:0050860	negative regulation of T cell receptor signaling pathway	4/1705	19/16374	0.128418	0.501753	0.443166	EZR/DUSP3/PHPT1/PRNP	4
GO:0097503	sialylation	4/1705	19/16374	0.128418	0.501753	0.443166	ST6GAL1/ST6GAL2/ST8SIA4/ST6GALNAC5	4
GO:0001932	regulation of protein phosphorylation	7/1705	41/16374	0.128815	0.502528	0.44385	CCDC88A/PLXNB2/NOP53/TADA3/CADM4/PIN1/HSPB1	7
GO:0007051	spindle organization	7/1705	41/16374	0.128815	0.502528	0.44385	CLTC/DYNC1H1/NUMA1/MAP9/PPP2R1A/GNAI1/CHD3	7
GO:0043542	endothelial cell migration	20/1705	147/16374	0.129203	0.503652	0.444843	NRP1/GLUL/AKT1/GIPC1/RHOA/ATP5F1A/LGMN/DNAJA4/SLIT2/NR2F2/APOE/SPARC/EMC10/GRN/ADGRB1/ATP5F1B/CALR/SCG2/HSPB1/TMSB4X	20
GO:0007178	transmembrane receptor protein serine/threonine kinase signaling pathway	27/1705	207/16374	0.129998	0.50636	0.447235	ZNF451/LNPEP/NUMA1/SPTBN1/STRAP/ZBTB7A/SDCBP/HTRA1/ACVR2A/SUB1/JUN/GIPC1/PCSK6/STK11/STUB1/VIM/PIN1/HSP90AB1/IRAK1/HSPA5/SOX11/UBC/TOB1/DKK3/FKBP8/UBB/HSPA1A	27
GO:0008286	insulin receptor signaling pathway	17/1705	122/16374	0.13084	0.509246	0.449784	PTPN11/BAIAP2/NUCKS1/SESN3/GRB2/PAK1/AKT1/ATP6V1B2/GNAI2/ATP6V1G1/PDK4/ATP6V0D1/ADIPOR1/RELA/ATP6V0B/ATP6AP1/PRKCB	17
GO:0030041	actin filament polymerization	13/1705	89/16374	0.131862	0.512358	0.452533	ARPC2/GRB2/RHOA/MICALL2/SLIT2/GSN/RAC1/MSRB2/WASF1/BAG4/FAM107A/PAK3/TENM1	13
GO:0035637	multicellular organismal signaling	13/1705	89/16374	0.131862	0.512358	0.452533	DMPK/ATP1A2/ATP2A2/NTRK2/SCN1A/SLC8A1/ATP2B2/ATP2B1/ATP1B1/ATP1B2/KCNMB4/ATP1A1/ANK3	13
GO:0009306	protein secretion	35/1705	277/16374	0.131943	0.512358	0.452533	PPP3CB/PTPN11/SEL1L/EZR/ARF1/VPS35/MIDN/NLGN2/PTPN23/GLUL/ERP29/HLA-E/CANX/PFKL/HMGCR/PPIA/RAPGEF4/TMBIM6/APOE/ATP13A2/GJA1/APBB1/SOX4/CNR1/FRMD4A/MYRIP/SCAMP5/PDIA4/SYT4/SLC25A6/SCG2/CACNA1E/SLC25A4/STXBP5L/SRCIN1	35
GO:0022037	metencephalon development	8/1705	49/16374	0.132342	0.51351	0.45355	PTPRS/MT-CO1/PAK1/KAT2A/MT-ND4/SDF4/UQCRQ/CKB	8
GO:0071375	cellular response to peptide hormone stimulus	16/1705	114/16374	0.133377	0.517129	0.456747	BAIAP2/ZFP36L1/GRB2/AKT1/ATP6V1B2/ATP6V1G1/ESRRA/ATP2B1/PDK4/ATP6V0D1/AGTRAP/CSK/MAP1B/CA2/ATP6V0B/ATP6AP1	16
GO:0051592	response to calcium ion	9/1705	57/16374	0.134059	0.51913	0.458514	SLC6A1/ENTPD6/MT-CYB/P2RX7/GDI1/SPARC/HOMER1/CALM3/CALM1	9
GO:0001775	cell activation	11/1705	73/16374	0.134201	0.51913	0.458514	STXBP3/FLNA/TLN1/LMO4/STXBP1/APOE/GNAS/TIMP1/GAS6/ACTB/HSPB1	11
GO:0042391	regulation of membrane potential	11/1705	73/16374	0.134201	0.51913	0.458514	KIF5B/AKAP9/YWHAE/FHL1/CNR1/YWHAH/GRIN1/HCN1/RIMS2/ASIC2/FGF12	11
GO:0070371	ERK1 and ERK2 cascade	34/1705	269/16374	0.1355	0.523752	0.462596	MAPK1/RAPGEF2/PTPN11/EIF3A/EZR/ZFP36L1/LMO3/NPTN/APP/NRP1/NDRG2/FGFR2/CRKL/JUN/ZFP36L2/GNAI2/SIRPA/HMGCR/DUSP3/GSTP1/APOE/ATF3/MAP2K2/SOX9/PHB2/CSK/PIN1/GAS6/PHB/EPHA7/ATP6AP1/NDRG4/MT3/CAMK2N1	34
GO:0009411	response to UV	7/1705	42/16374	0.14153	0.545393	0.48171	UBE2B/TROVE2/NPM1/CIRBP/BRSK1/USP1/RPL26	7
GO:0034332	adherens junction organization	7/1705	42/16374	0.14153	0.545393	0.48171	MAPRE2/IQSEC1/PTPN23/CDH10/NUMBL/CDH8/CADM3	7
GO:0035967	cellular response to topologically incorrect protein	7/1705	42/16374	0.14153	0.545393	0.48171	CREBRF/CDK5RAP3/SELENOS/DERL1/BAG6/STUB1/HSPA5	7
GO:0060412	ventricular septum morphogenesis	7/1705	42/16374	0.14153	0.545393	0.48171	FGFR2/EGLN1/SLIT2/RBM15/SOX4/ID2/SOX11	7
GO:0006839	mitochondrial transport	12/1705	82/16374	0.14219	0.547517	0.483586	HSPA4/HSP90AA1/BNIP3L/MICALL2/KIF1BP/BNIP3/BAG4/TOMM7/PINK1/UBL5/CNP/ATP5IF1	12
GO:0006749	glutathione metabolic process	5/1705	27/16374	0.143319	0.550189	0.485947	NFE2L1/GSTA4/GSTP1/SOD1/GPX4	5
GO:0021954	central nervous system neuron development	5/1705	27/16374	0.143319	0.550189	0.485947	MAPT/HSP90AA1/NTRK2/B4GALT6/HSP90AB1	5
GO:0043392	negative regulation of DNA binding	5/1705	27/16374	0.143319	0.550189	0.485947	HDAC2/CPNE1/JUN/HMOX1/NFKBIA	5
GO:0046329	negative regulation of JNK cascade	5/1705	27/16374	0.143319	0.550189	0.485947	AKT1/ZNF675/SIRPA/DUSP3/PINK1	5
GO:0009060	aerobic respiration	8/1705	50/16374	0.144056	0.550659	0.486362	SUCLA2/IDH2/NOP53/UQCRC1/BNIP3/CS/MDH2/ATP5F1D	8
GO:0010923	negative regulation of phosphatase activity	8/1705	50/16374	0.144056	0.550659	0.486362	WNK1/CSRNP3/CHP1/MYO1D/CD2BP2/RIMBP2/PCDH11X/ARFGEF3	8
GO:1990874	vascular smooth muscle cell proliferation	8/1705	50/16374	0.144056	0.550659	0.486362	TPM1/MEF2D/MFN2/PAK1/JUN/HMOX1/GNAI2/GSTP1	8
GO:0007044	cell-substrate junction assembly	10/1705	66/16374	0.144693	0.550659	0.486362	ITGA6/SLK/NRP1/TLN1/DLC1/RHOA/RAC1/DUSP3/S100A10/FAM107A	10
GO:0030512	negative regulation of transforming growth factor beta receptor signaling pathway	10/1705	66/16374	0.144693	0.550659	0.486362	ZNF451/STRAP/ZBTB7A/HTRA1/STUB1/PIN1/HSPA5/UBC/UBB/HSPA1A	10
GO:0035249	synaptic transmission, glutamatergic	9/1705	58/16374	0.144926	0.550659	0.486362	ATP1A2/NLGN2/GLUL/SYT1/UNC13A/CNR1/CLSTN3/HOMER1/GRIN1	9
GO:0070527	platelet aggregation	9/1705	58/16374	0.144926	0.550659	0.486362	STXBP3/FLNA/TLN1/STXBP1/CD9/GNAS/GAS6/ACTB/HSPB1	9
GO:0001818	negative regulation of cytokine production	3/1705	13/16374	0.146385	0.550659	0.486362	NPTN/NDRG2/ATP2B1	3
GO:0001967	suckling behavior	3/1705	13/16374	0.146385	0.550659	0.486362	GLS/APP/GRIN1	3
GO:0002087	regulation of respiratory gaseous exchange by nervous system process	3/1705	13/16374	0.146385	0.550659	0.486362	GLS/ATP1A2/NLGN2	3
GO:0002438	acute inflammatory response to antigenic stimulus	3/1705	13/16374	0.146385	0.550659	0.486362	SELENOS/PARK7/CNR1	3
GO:0014912	negative regulation of smooth muscle cell migration	3/1705	13/16374	0.146385	0.550659	0.486362	SEMA6D/SLIT2/NDRG4	3
GO:0032288	myelin assembly	3/1705	13/16374	0.146385	0.550659	0.486362	CD9/EPB41L3/GPC1	3
GO:0033628	regulation of cell adhesion mediated by integrin	3/1705	13/16374	0.146385	0.550659	0.486362	PTPN11/CRK/CRKL	3
GO:0038007	netrin-activated signaling pathway	3/1705	13/16374	0.146385	0.550659	0.486362	DSCAM/UNC5C/SHTN1	3
GO:0042790	nucleolar large rRNA transcription by RNA polymerase I	3/1705	13/16374	0.146385	0.550659	0.486362	NOP53/NCL/PIH1D1	3
GO:0043508	negative regulation of JUN kinase activity	3/1705	13/16374	0.146385	0.550659	0.486362	ZNF675/GSTP1/DNAJA1	3
GO:0045717	negative regulation of fatty acid biosynthetic process	3/1705	13/16374	0.146385	0.550659	0.486362	ACADVL/ERLIN2/INSIG1	3
GO:0048489	synaptic vesicle transport	3/1705	13/16374	0.146385	0.550659	0.486362	ARF1/SYNJ1/PINK1	3
GO:0051457	maintenance of protein location in nucleus	3/1705	13/16374	0.146385	0.550659	0.486362	HNRNPU/SKP1/TOPORS	3
GO:0051788	response to misfolded protein	3/1705	13/16374	0.146385	0.550659	0.486362	DERL1/CLU/BAG6	3
GO:0060219	camera-type eye photoreceptor cell differentiation	3/1705	13/16374	0.146385	0.550659	0.486362	NTRK2/TOPORS/DSCAM	3
GO:0061029	eyelid development in camera-type eye	3/1705	13/16374	0.146385	0.550659	0.486362	HDAC2/JUN/SOX11	3
GO:0061045	negative regulation of wound healing	3/1705	13/16374	0.146385	0.550659	0.486362	CRK/HMGCR/GJA1	3
GO:0140115	export across plasma membrane	3/1705	13/16374	0.146385	0.550659	0.486362	YWHAE/ATP1B1/ATP1B2	3
GO:1902894	negative regulation of pri-miRNA transcription by RNA polymerase II	3/1705	13/16374	0.146385	0.550659	0.486362	YY1/SOX9/RELA	3
GO:1902902	negative regulation of autophagosome assembly	3/1705	13/16374	0.146385	0.550659	0.486362	FEZ1/NUPR1/PINK1	3
GO:0071495	cellular response to endogenous stimulus	31/1705	245/16374	0.146891	0.552152	0.48768	HNRNPH1/MAPK1/POLR2B/RAPGEF2/PTPN11/SORT1/KIDINS220/DDX5/POLR2A/GRB2/FGFR2/ACVR2A/SKIL/CRKL/JUN/RAB14/MEGF8/RHOA/HNRNPA1/NCBP2/PTBP1/FAT4/POLR2E/PARP1/ADIPOR1/GTF2F1/POLR2L/UBC/UBB/THRA/FGF12	31
GO:0006414	translational elongation	4/1705	20/16374	0.148028	0.553136	0.488549	SRP9/TUFM/RPLP2/EEF1B2	4
GO:0008053	mitochondrial fusion	4/1705	20/16374	0.148028	0.553136	0.488549	MFN2/BNIP3/BAX/FIS1	4
GO:0010881	regulation of cardiac muscle contraction by regulation of the release of sequestered calcium ion	4/1705	20/16374	0.148028	0.553136	0.488549	ATP1A2/SLC8A1/CALM3/CALM1	4
GO:0014044	Schwann cell development	4/1705	20/16374	0.148028	0.553136	0.488549	DAG1/ADAM22/NTRK2/NRG1	4
GO:0030262	apoptotic nuclear changes	4/1705	20/16374	0.148028	0.553136	0.488549	KPNB1/BLCAP/CDK5RAP3/H1F0	4
GO:0034381	plasma lipoprotein particle clearance	4/1705	20/16374	0.148028	0.553136	0.488549	HNRNPK/LRPAP1/KHSRP/CSK	4
GO:0043279	response to alkaloid	4/1705	20/16374	0.148028	0.553136	0.488549	TMED10/SRSF9/UQCRC1/HOMER1	4
GO:0060445	branching involved in salivary gland morphogenesis	4/1705	20/16374	0.148028	0.553136	0.488549	DAG1/NRP1/FGFR2/SEMA3C	4
GO:0051092	positive regulation of NF-kappaB transcription factor activity	20/1705	150/16374	0.148861	0.555837	0.490935	MTDH/UBE2N/NPM1/PRKCI/APP/ZBTB7A/DDRGK1/MTPN/TRIM8/KRAS/CLU/TERF2IP/RELA/RPS3/HSPA1B/IRAK1/UBC/UBB/HSPA1A/PRKCB	20
GO:0061351	neural precursor cell proliferation	13/1705	91/16374	0.149034	0.556072	0.491142	NAP1L1/FZD3/ADGRG1/FLNA/SMARCD3/RHOA/NUMBL/GNAI2/POU3F3/NES/ID2/KIF1A/FAM19A1	13
GO:0035051	cardiocyte differentiation	6/1705	35/16374	0.151037	0.562713	0.497008	HNRNPU/KAT2A/SGCB/SLC8A1/EFNB2/NRG1	6
GO:0035094	response to nicotine	6/1705	35/16374	0.151037	0.562713	0.497008	MAPK1/HDAC2/ATP1A2/MT-ND4/HMOX1/CNR1	6
GO:0009888	tissue development	27/1705	211/16374	0.152155	0.566461	0.500318	HNRNPH3/ACADVL/ZFP36L1/ITGA6/HDAC2/DDRGK1/FGFR2/VDAC1/AKT1/ID4/ATF4/TOLLIP/ESRRA/GAA/KRT10/SOX9/PIH1D1/CEBPB/FRAS1/CBR1/GNAS/TIMP1/GAS6/ID3/CA2/MBD3/CTSB	27
GO:0007030	Golgi organization	11/1705	75/16374	0.15355	0.566847	0.50066	CAMSAP2/AKAP9/CSNK1D/CDC42/SURF4/ARL1/TMED2/OBSL1/TMED9/OPTN/CIT	11
GO:0007159	leukocyte cell-cell adhesion	7/1705	43/16374	0.154822	0.566847	0.50066	WNK1/MIA3/EZR/AKT1/RHOA/RELA/IRAK1	7
GO:0018210	peptidyl-threonine modification	7/1705	43/16374	0.154822	0.566847	0.50066	MAPK1/APP/EIF4G1/CADM4/CALM3/DDIT4/CALM1	7
GO:0043967	histone H4 acetylation	7/1705	43/16374	0.154822	0.566847	0.50066	USP22/MORF4L1/CTBP1/DMAP1/RUVBL2/APBB1/PIH1D1	7
GO:0097581	lamellipodium organization	7/1705	43/16374	0.154822	0.566847	0.50066	ARPC2/CDC42/AKIRIN1/SLIT2/RAC1/BRK1/ARPC5	7
GO:0034622	cellular protein-containing complex assembly	9/1705	59/16374	0.156223	0.566847	0.50066	DNAJB14/HSP90AA1/VDAC2/STXBP6/SEPT8/STXBP1/STUB1/PARP1/AP2M1	9
GO:0006383	transcription by RNA polymerase III	8/1705	51/16374	0.156262	0.566847	0.50066	CHD8/TROVE2/GTF3C1/IVNS1ABP/GTF3A/POLR2E/POLR2L/TENM1	8
GO:0033077	T cell differentiation in thymus	8/1705	51/16374	0.156262	0.566847	0.50066	ZFP36L1/CLPTM1/ZFP36L2/NCAPH2/RPS6/JMJD6/SOD1/B2M	8
GO:0050885	neuromuscular process controlling balance	8/1705	51/16374	0.156262	0.566847	0.50066	HERC1/APP/NLGN2/DLG4/GAA/PSAP/ADCY5/PCDH15	8
GO:0001503	ossification	30/1705	238/16374	0.156437	0.566847	0.50066	MAPK1/HNRNPU/SNRNP200/CLTC/DDX21/SORT1/SYNCRIP/RRBP1/MEF2D/TPM4/FGFR2/TOB2/AKT1/RSL1D1/COL6A1/CSF1/SNX10/H3F3B/GJA1/SOX9/FASN/RASSF2/SPARC/SOX11/ATP5F1B/PHB/RPL38/SBDS/THRA/JUNB	30
GO:0001554	luteolysis	2/1705	7/16374	0.159996	0.566847	0.50066	SLIT2/HSPA5	2
GO:0002082	regulation of oxidative phosphorylation	2/1705	7/16374	0.159996	0.566847	0.50066	SLC25A23/PINK1	2
GO:0002903	negative regulation of B cell apoptotic process	2/1705	7/16374	0.159996	0.566847	0.50066	SLC39A10/NOC2L	2
GO:0003357	noradrenergic neuron differentiation	2/1705	7/16374	0.159996	0.566847	0.50066	SOX4/SOX11	2
GO:0006475	internal protein amino acid acetylation	2/1705	7/16374	0.159996	0.566847	0.50066	MAPT/MDH2	2
GO:0006740	NADPH regeneration	2/1705	7/16374	0.159996	0.566847	0.50066	TKT/PGAM1	2
GO:0006924	activation-induced cell death of T cells	2/1705	7/16374	0.159996	0.566847	0.50066	AKT1/RPS6	2
GO:0006972	hyperosmotic response	2/1705	7/16374	0.159996	0.566847	0.50066	PKN1/SLC12A2	2
GO:0007144	female meiosis I	2/1705	7/16374	0.159996	0.566847	0.50066	CDC25B/UBB	2
GO:0008211	glucocorticoid metabolic process	2/1705	7/16374	0.159996	0.566847	0.50066	STUB1/ATP1A1	2
GO:0010591	regulation of lamellipodium assembly	2/1705	7/16374	0.159996	0.566847	0.50066	CDC42/RAC1	2
GO:0010882	regulation of cardiac muscle contraction by calcium ion signaling	2/1705	7/16374	0.159996	0.566847	0.50066	SLC8A1/ATP1B1	2
GO:0014049	positive regulation of glutamate secretion	2/1705	7/16374	0.159996	0.566847	0.50066	P2RX7/SYT4	2
GO:0016188	synaptic vesicle maturation	2/1705	7/16374	0.159996	0.566847	0.50066	DLG4/STXBP1	2
GO:0019064	fusion of virus membrane with host plasma membrane	2/1705	7/16374	0.159996	0.566847	0.50066	PPIA/GAS6	2
GO:0030913	paranodal junction assembly	2/1705	7/16374	0.159996	0.566847	0.50066	CD9/EPB41L3	2
GO:0032808	lacrimal gland development	2/1705	7/16374	0.159996	0.566847	0.50066	FGFR2/SOX9	2
GO:0033864	positive regulation of NAD(P)H oxidase activity	2/1705	7/16374	0.159996	0.566847	0.50066	PARK7/GNAI2	2
GO:0034660	ncRNA metabolic process	2/1705	7/16374	0.159996	0.566847	0.50066	KHSRP/RELA	2
GO:0035510	DNA dealkylation	2/1705	7/16374	0.159996	0.566847	0.50066	USP7/TRIM28	2
GO:0036018	cellular response to erythropoietin	2/1705	7/16374	0.159996	0.566847	0.50066	MT2A/MT1X	2
GO:0036066	protein O-linked fucosylation	2/1705	7/16374	0.159996	0.566847	0.50066	RFNG/POFUT2	2
GO:0036462	TRAIL-activated apoptotic signaling pathway	2/1705	7/16374	0.159996	0.566847	0.50066	PARK7/ATF3	2
GO:0040036	regulation of fibroblast growth factor receptor signaling pathway	2/1705	7/16374	0.159996	0.566847	0.50066	FAM20C/FGFR2	2
GO:0042167	heme catabolic process	2/1705	7/16374	0.159996	0.566847	0.50066	BLVRB/HMOX1	2
GO:0042297	vocal learning	2/1705	7/16374	0.159996	0.566847	0.50066	CNTNAP2/NRXN2	2
GO:0043496	regulation of protein homodimerization activity	2/1705	7/16374	0.159996	0.566847	0.50066	BAX/NRG1	2
GO:0043983	histone H4-K12 acetylation	2/1705	7/16374	0.159996	0.566847	0.50066	MEAF6/KAT2A	2
GO:0044341	sodium-dependent phosphate transport	2/1705	7/16374	0.159996	0.566847	0.50066	ATF4/CEBPB	2
GO:0046653	tetrahydrofolate metabolic process	2/1705	7/16374	0.159996	0.566847	0.50066	PIPOX/DHFR	2
GO:0046887	positive regulation of hormone secretion	2/1705	7/16374	0.159996	0.566847	0.50066	PTPN11/SOX11	2
GO:0048843	negative regulation of axon extension involved in axon guidance	2/1705	7/16374	0.159996	0.566847	0.50066	NRP1/PLXNA3	2
GO:0050861	positive regulation of B cell receptor signaling pathway	2/1705	7/16374	0.159996	0.566847	0.50066	PRKCB/CD81	2
GO:0050882	voluntary musculoskeletal movement	2/1705	7/16374	0.159996	0.566847	0.50066	VPS35/MAP1A	2
GO:0050920	regulation of chemotaxis	2/1705	7/16374	0.159996	0.566847	0.50066	USP14/EFNB2	2
GO:0051001	negative regulation of nitric-oxide synthase activity	2/1705	7/16374	0.159996	0.566847	0.50066	NOSIP/CNR1	2
GO:0060179	male mating behavior	2/1705	7/16374	0.159996	0.566847	0.50066	HDAC2/GRIN1	2
GO:0060717	chorion development	2/1705	7/16374	0.159996	0.566847	0.50066	DNAJB6/HTRA1	2
GO:0060998	regulation of dendritic spine development	2/1705	7/16374	0.159996	0.566847	0.50066	CPEB3/CAMK2B	2
GO:0071169	establishment of protein localization to chromatin	2/1705	7/16374	0.159996	0.566847	0.50066	RUVBL2/PIH1D1	2
GO:0071472	cellular response to salt stress	2/1705	7/16374	0.159996	0.566847	0.50066	ZFP36L1/SLC25A23	2
GO:0071475	cellular hyperosmotic salinity response	2/1705	7/16374	0.159996	0.566847	0.50066	XRCC6/SLC25A23	2
GO:0071712	ER-associated misfolded protein catabolic process	2/1705	7/16374	0.159996	0.566847	0.50066	DERL1/BAG6	2
GO:0090647	modulation of age-related behavioral decline	2/1705	7/16374	0.159996	0.566847	0.50066	APP/PRNP	2
GO:0099563	modification of synaptic structure	2/1705	7/16374	0.159996	0.566847	0.50066	GRIPAP1/EPHA4	2
GO:1900122	positive regulation of receptor binding	2/1705	7/16374	0.159996	0.566847	0.50066	PLCL1/B2M	2
GO:1900223	positive regulation of amyloid-beta clearance	2/1705	7/16374	0.159996	0.566847	0.50066	LRPAP1/APOE	2
GO:1900242	regulation of synaptic vesicle endocytosis	2/1705	7/16374	0.159996	0.566847	0.50066	PPP3CB/CALM3	2
GO:1902774	late endosome to lysosome transport	2/1705	7/16374	0.159996	0.566847	0.50066	ARF1/VPS35	2
GO:1903599	positive regulation of autophagy of mitochondrion	2/1705	7/16374	0.159996	0.566847	0.50066	PARK7/BNIP3	2
GO:1905461	positive regulation of vascular associated smooth muscle cell apoptotic process	2/1705	7/16374	0.159996	0.566847	0.50066	MFN2/ATF4	2
GO:1990791	dorsal root ganglion development	2/1705	7/16374	0.159996	0.566847	0.50066	NRP1/UNC5C	2
GO:2000144	positive regulation of DNA-templated transcription, initiation	2/1705	7/16374	0.159996	0.566847	0.50066	BCLAF1/JUN	2
GO:2000270	negative regulation of fibroblast apoptotic process	2/1705	7/16374	0.159996	0.566847	0.50066	CHD8/GAS6	2
GO:2000369	regulation of clathrin-dependent endocytosis	2/1705	7/16374	0.159996	0.566847	0.50066	SNAP91/DNAJC6	2
GO:2000641	regulation of early endosome to late endosome transport	2/1705	7/16374	0.159996	0.566847	0.50066	MAPK1/MAP2K2	2
GO:0007628	adult walking behavior	5/1705	28/16374	0.16045	0.566847	0.50066	OXR1/SCN1A/GLRB/DAB1/EPHA4	5
GO:0008306	associative learning	5/1705	28/16374	0.16045	0.566847	0.50066	ACTR2/LGMN/PPT1/BRSK1/MAP1A	5
GO:0048147	negative regulation of fibroblast proliferation	5/1705	28/16374	0.16045	0.566847	0.50066	EMD/GSTP1/FTH1/BAX/NUPR1	5
GO:0051602	response to electrical stimulus	5/1705	28/16374	0.16045	0.566847	0.50066	AKAP9/FZD3/MT-CO1/P2RX7/EEF1A2	5
GO:0061515	myeloid cell development	5/1705	28/16374	0.16045	0.566847	0.50066	FAM20C/PTBP3/ZBTB7A/PABPC4/ATP6AP1	5
GO:0090200	positive regulation of release of cytochrome c from mitochondria	5/1705	28/16374	0.16045	0.566847	0.50066	PDCD5/CHCHD10/BNIP3/BAX/PINK1	5
GO:1900087	positive regulation of G1/S transition of mitotic cell cycle	5/1705	28/16374	0.16045	0.566847	0.50066	DDX3X/CCND2/AKT1/PLRG1/EIF4G1	5
GO:0044248	cellular catabolic process	20/1705	152/16374	0.162849	0.574922	0.507791	SCARB2/HERC1/MTDH/MAPT/DDIT3/TMEM59/AKT1/ULK1/EIF4G1/PIP4K2B/TRIM8/EIF4G2/STK11/CISD2/BNIP3/NUPR1/OPTN/PSAP/HSPB1/MT3	20
GO:0030900	forebrain development	14/1705	101/16374	0.163713	0.577228	0.509828	ATRX/TOP2B/PGAP1/GNAO1/APP/DLC1/KAT2A/ID4/SLC8A1/NR2F2/CNTNAP2/MYO1D/DNAJB1/CNP	14
GO:0045333	cellular respiration	11/1705	76/16374	0.163731	0.577228	0.509828	NDUFS1/SUCLA2/IDH2/LYRM7/NOP53/BNIP3/SLC25A23/CS/PINK1/MDH2/CYCS	11
GO:0010876	lipid localization	10/1705	68/16374	0.166101	0.584722	0.516447	ESYT2/PDZD8/VPS51/APOO/SORL1/SPNS1/LRP10/PLIN2/PLTP/PSAP	10
GO:0014009	glial cell proliferation	6/1705	36/16374	0.166319	0.584722	0.516447	RNF10/PRKCI/PPP1CC/IDH2/SOX4/SOX11	6
GO:0014812	muscle cell migration	6/1705	36/16374	0.166319	0.584722	0.516447	CRK/NRP1/SORL1/SEMA6D/SLIT2/NDRG4	6
GO:0034614	cellular response to reactive oxygen species	6/1705	36/16374	0.166319	0.584722	0.516447	MAPK1/MAPT/TPM1/JUN/AKT1/AGAP3	6
GO:0006486	protein glycosylation	13/1705	93/16374	0.16733	0.587459	0.518864	EXTL3/TMEM59/DAD1/DDOST/B3GAT2/CHP1/B3GAT1/ST6GAL2/ST8SIA4/B4GALT6/B3GAT3/ST6GALNAC5/MT3	13
GO:0035690	cellular response to drug	13/1705	93/16374	0.16733	0.587459	0.518864	PPP3CB/PPM1E/CRKL/QDPR/RAP2A/MT2A/HSP90AB1/GAS6/HSPA5/CALY/NSG2/PRNP/MT3	13
GO:0002526	acute inflammatory response	7/1705	44/16374	0.168664	0.588202	0.519521	IL6ST/F3/SELENOS/PARK7/GSTP1/CNR1/NUPR1	7
GO:0007163	establishment or maintenance of cell polarity	7/1705	44/16374	0.168664	0.588202	0.519521	CDC42BPB/ACTR2/STK25/CDC42/RACK1/RNF41/SHTN1	7
GO:0019935	cyclic-nucleotide-mediated signaling	7/1705	44/16374	0.168664	0.588202	0.519521	UBE2B/RAPGEF2/PDE4D/PDE3B/CDC34/PEX5L/GNAI1	7
GO:0007026	negative regulation of microtubule depolymerization	4/1705	21/16374	0.1687	0.588202	0.519521	HDGFL3/STMN2/FGF13/MAP1B	4
GO:0008361	regulation of cell size	4/1705	21/16374	0.1687	0.588202	0.519521	MTPN/RAC1/LAMTOR4/LAMTOR5	4
GO:0014850	response to muscle activity	4/1705	21/16374	0.1687	0.588202	0.519521	TOMM20/GOT2/ATP5PF/FIS1	4
GO:0015833	peptide transport	4/1705	21/16374	0.1687	0.588202	0.519521	NDFIP1/SNX3/CHP1/DNAJA1	4
GO:0031954	positive regulation of protein autophosphorylation	4/1705	21/16374	0.1687	0.588202	0.519521	RAP2A/RASSF2/CALM3/CALM1	4
GO:0000281	mitotic cytokinesis	8/1705	52/16374	0.168939	0.588202	0.519521	SON/SPTBN1/MAP9/JTB/RAB35/CIT/STMN1/ANK3	8
GO:0034101	erythrocyte homeostasis	8/1705	52/16374	0.168939	0.588202	0.519521	NFE2L1/HMOX1/RPS17/RPS14/RPS24/PRDX1/THRA/ATP5IF1	8
GO:0043086	negative regulation of catalytic activity	8/1705	52/16374	0.168939	0.588202	0.519521	HNRNPR/RNH1/NOSIP/OAZ2/TMBIM1/NES/TIMP1/SCG5	8
GO:0071320	cellular response to cAMP	8/1705	52/16374	0.168939	0.588202	0.519521	AKAP9/RAPGEF2/EZR/ZFP36L1/APP/SLC8A1/HSPA5/HCN1	8
GO:0044703	multi-organism reproductive process	18/1705	136/16374	0.171849	0.593786	0.524453	SPP1/ACSL4/APP/DDR1/IGFBP7/ACVR2A/FKBP4/NR2F2/H3F3B/TRO/BSG/BAX/CNR1/SOD1/RPL29/TRIM28/CST3/JUNB	18
GO:0000302	response to reactive oxygen species	3/1705	14/16374	0.172659	0.593786	0.524453	SESN3/GSTP1/APOE	3
GO:0006835	dicarboxylic acid transport	3/1705	14/16374	0.172659	0.593786	0.524453	P2RX7/SYT4/GRM7	3
GO:0006882	cellular zinc ion homeostasis	3/1705	14/16374	0.172659	0.593786	0.524453	SLC39A6/ATP13A2/MT3	3
GO:0010952	positive regulation of peptidase activity	3/1705	14/16374	0.172659	0.593786	0.524453	APP/CLPX/PINK1	3
GO:0021801	cerebral cortex radial glia guided migration	3/1705	14/16374	0.172659	0.593786	0.524453	ADGRG1/MBOAT7/RTN4	3
GO:0030207	chondroitin sulfate catabolic process	3/1705	14/16374	0.172659	0.593786	0.524453	BCAN/NCAN/CSPG5	3
GO:0032486	Rap protein signal transduction	3/1705	14/16374	0.172659	0.593786	0.524453	RAPGEF2/TIMP2/RAP2A	3
GO:0048168	regulation of neuronal synaptic plasticity	3/1705	14/16374	0.172659	0.593786	0.524453	APOE/S100B/NSMF	3
GO:0050862	positive regulation of T cell receptor signaling pathway	3/1705	14/16374	0.172659	0.593786	0.524453	RELA/RPS3/CD81	3
GO:0051016	barbed-end actin filament capping	3/1705	14/16374	0.172659	0.593786	0.524453	MTPN/GSN/ADD2	3
GO:0051650	establishment of vesicle localization	3/1705	14/16374	0.172659	0.593786	0.524453	ARF1/YKT6/PINK1	3
GO:0090141	positive regulation of mitochondrial fission	3/1705	14/16374	0.172659	0.593786	0.524453	VPS35/BNIP3/FIS1	3
GO:0090505	epiboly involved in wound healing	3/1705	14/16374	0.172659	0.593786	0.524453	FLNA/DDR1/RHOA	3
GO:1902570	protein localization to nucleolus	3/1705	14/16374	0.172659	0.593786	0.524453	GLUL/NOP53/RAN	3
GO:1904380	endoplasmic reticulum mannose trimming	3/1705	14/16374	0.172659	0.593786	0.524453	SEL1L/OS9/RNF139	3
GO:1904645	response to amyloid-beta	3/1705	14/16374	0.172659	0.593786	0.524453	DNM1/PRNP/CACNA1B	3
GO:2000406	positive regulation of T cell migration	3/1705	14/16374	0.172659	0.593786	0.524453	APP/RHOA/SELENOK	3
GO:0007565	female pregnancy	20/1705	154/16374	0.17752	0.610059	0.538826	SPP1/LNPEP/ACSL4/DDR1/IGFBP7/MAGED2/FKBP4/SLC38A2/KRAS/EPN1/H3F3B/TRO/BSG/GOT2/CNR1/SOD1/RPL29/TRIM28/CST3/JUNB	20
GO:0006294	nucleotide-excision repair, preincision complex assembly	5/1705	29/16374	0.178356	0.610059	0.538826	DDB1/RBX1/PARP1/UBC/UBB	5
GO:0007422	peripheral nervous system development	5/1705	29/16374	0.178356	0.610059	0.538826	EDNRB/GPC1/PLXNA4/ADGRB1/ASIC2	5
GO:0010803	regulation of tumor necrosis factor-mediated signaling pathway	5/1705	29/16374	0.178356	0.610059	0.538826	TNFRSF1A/RACK1/HIPK1/MADD/CLIP3	5
GO:0042330	taxis	5/1705	29/16374	0.178356	0.610059	0.538826	USP14/DUSP3/EPHA4/EFNB2/STX3	5
GO:0045739	positive regulation of DNA repair	5/1705	29/16374	0.178356	0.610059	0.538826	UBE2N/UBE2V2/APBB1/RPS3/TRIM28	5
GO:0050650	chondroitin sulfate proteoglycan biosynthetic process	5/1705	29/16374	0.178356	0.610059	0.538826	BCAN/NCAN/B3GAT3/CSPG5/CHSY3	5
GO:0060402	calcium ion transport into cytosol	5/1705	29/16374	0.178356	0.610059	0.538826	CACNA2D1/SLC8A1/P2RX7/TMBIM6/GRIN1	5
GO:0030036	actin cytoskeleton organization	29/1705	233/16374	0.178577	0.6104	0.539127	DNAJB6/BAIAP2/CCDC88A/CRK/NISCH/ARF1/CDC42/PRKCI/NRP1/SDCBP/DLC1/RHOA/KRAS/GSN/DAAM2/RAC1/TMSB10/ELMO1/ADD2/EPHA5/INF2/SORBS2/BRK1/ARPC5/FAM107A/PHPT1/RAN/TMSB4X/ARHGDIA	29
GO:0032922	circadian regulation of gene expression	9/1705	61/16374	0.180039	0.61498	0.543172	HNRNPU/CSNK1D/MYCBP2/HDAC2/BHLHE41/PPP1CC/ATF4/ID2/CSNK1E	9
GO:0060041	retina development in camera-type eye	12/1705	86/16374	0.181007	0.61787	0.545724	GNB1/LPCAT1/SMARCD3/NTRK2/ATP2B1/PFDN5/JMJD6/SOX9/BAX/RPL24/IMPDH2/RAB11FIP4	12
GO:0001662	behavioral fear response	6/1705	37/16374	0.182221	0.619502	0.547166	DEAF1/VDAC1/EIF4G1/APOE/GJA1/BRINP1	6
GO:0006296	nucleotide-excision repair, DNA incision, 5'-to lesion	6/1705	37/16374	0.182221	0.619502	0.547166	DDB1/RBX1/POLD2/PARP1/UBC/UBB	6
GO:0019319	hexose biosynthetic process	6/1705	37/16374	0.182221	0.619502	0.547166	RANBP2/DDB1/FAM3C/SELENOS/PGP/ARPP19	6
GO:0030574	collagen catabolic process	6/1705	37/16374	0.182221	0.619502	0.547166	CTSL/ADAMTS3/ADAM15/COL19A1/CST3/CTSB	6
GO:0044409	entry into host	6/1705	37/16374	0.182221	0.619502	0.547166	SNX3/P4HB/TRIM8/GSN/IFITM3/LGALS1	6
GO:0045022	early endosome to late endosome transport	6/1705	37/16374	0.182221	0.619502	0.547166	MAPK1/RAB21/SNX3/EZR/PTPN23/MAP2K2	6
GO:0010508	positive regulation of autophagy	7/1705	45/16374	0.183024	0.620979	0.54847	MTDH/TMEM59/ULK1/TRIM8/STK11/BNIP3/OPTN	7
GO:0042220	response to cocaine	7/1705	45/16374	0.183024	0.620979	0.54847	SLC6A1/HDAC2/HDAC5/CNR1/HSP90AB1/HOMER1/HSPA5	7
GO:0045599	negative regulation of fat cell differentiation	7/1705	45/16374	0.183024	0.620979	0.54847	SORT1/DDIT3/ZFP36L2/ID4/TRIB2/RUNX1T1/INSIG1	7
GO:0008630	intrinsic apoptotic signaling pathway in response to DNA damage	10/1705	70/16374	0.188934	0.635462	0.561263	TNFRSF1A/HNRNPK/NACC2/SKIL/CLU/HMOX1/TOPORS/RPS3/TPT1/RPL26	10
GO:0006783	heme biosynthetic process	4/1705	22/16374	0.190308	0.635462	0.561263	NFE2L1/SLC25A39/UROS/ATP5IF1	4
GO:0007215	glutamate receptor signaling pathway	4/1705	22/16374	0.190308	0.635462	0.561263	GRIA3/UNC13A/GRIN2A/PRNP	4
GO:0010460	positive regulation of heart rate	4/1705	22/16374	0.190308	0.635462	0.561263	TPM1/PDE4D/ATP2A2/ATP5PF	4
GO:0010842	retina layer formation	4/1705	22/16374	0.190308	0.635462	0.561263	HIPK1/TOPORS/DSCAM/FJX1	4
GO:0014898	cardiac muscle hypertrophy in response to stress	4/1705	22/16374	0.190308	0.635462	0.561263	LMNA/INPP5F/ATP2A2/CAMTA2	4
GO:0035584	calcium-mediated signaling using intracellular calcium source	4/1705	22/16374	0.190308	0.635462	0.561263	ADGRL1/BCAP31/FIS1/PRNP	4
GO:0045807	positive regulation of endocytosis	4/1705	22/16374	0.190308	0.635462	0.561263	ARF1/APOE/CALY/CLIP3	4
GO:0046580	negative regulation of Ras protein signal transduction	4/1705	22/16374	0.190308	0.635462	0.561263	PPP2CB/SYNGAP1/MFN2/TIMP2	4
GO:0046716	muscle cell cellular homeostasis	4/1705	22/16374	0.190308	0.635462	0.561263	LAMP2/GAA/SOD1/SGCZ	4
GO:0060999	positive regulation of dendritic spine development	4/1705	22/16374	0.190308	0.635462	0.561263	ARF1/CPEB3/CDKL5/APOE	4
GO:0061919	process utilizing autophagic mechanism	19/1705	147/16374	0.19055	0.635462	0.561263	HERC1/MTDH/MAPT/DDIT3/TMEM59/AKT1/ULK1/EIF4G1/PIP4K2B/TRIM8/EIF4G2/STK11/CISD2/BNIP3/NUPR1/OPTN/PSAP/HSPB1/MT3	19
GO:0006633	fatty acid biosynthetic process	9/1705	62/16374	0.192524	0.635462	0.561263	ACSL3/ACADVL/ERLIN2/PRKAB2/NDUFAB1/PDK4/ADIPOR1/FASN/INSIG1	9
GO:0098662	inorganic cation transmembrane transport	9/1705	62/16374	0.192524	0.635462	0.561263	ARF1/FLNA/ATP1A2/SNTA1/DPP10/CD63/CBARP/PRNP/FGF12	9
GO:0002042	cell migration involved in sprouting angiogenesis	8/1705	54/16374	0.195616	0.635462	0.561263	MIA3/NRP1/AKT1/RHOA/HMOX1/HDAC5/SLIT2/EFNB2	8
GO:0008366	axon ensheathment	8/1705	54/16374	0.195616	0.635462	0.561263	RNF10/DAG1/AKT1/TMEM98/EPB41L3/S100B/GPC1/PLP1	8
GO:0008610	lipid biosynthetic process	11/1705	79/16374	0.19617	0.635462	0.561263	ACADVL/IGFBP7/ERLIN2/AKT1/PRKAB2/ASAH1/PDK4/PRPF19/APOE/ADIPOR1/INSIG1	11
GO:0001913	T cell mediated cytotoxicity	5/1705	30/16374	0.196968	0.635462	0.561263	PPP3CB/FAM49B/HLA-E/P2RX7/B2M	5
GO:0048483	autonomic nervous system development	5/1705	30/16374	0.196968	0.635462	0.561263	NRP1/EDNRB/SOX4/PLXNA4/SOX11	5
GO:0034260	negative regulation of GTPase activity	7/1705	46/16374	0.197871	0.635462	0.561263	WNK1/CPEB2/GPSM1/GPS1/SLIT2/TMED2/PTPRN2	7
GO:0071902	positive regulation of protein serine/threonine kinase activity	7/1705	46/16374	0.197871	0.635462	0.561263	DDX3X/RHOA/MAP2K2/PIH1D1/HSP90AB1/CALM3/CALM1	7
GO:0006306	DNA methylation	6/1705	38/16374	0.198695	0.635462	0.561263	ATRX/EHMT2/DMAP1/PARP1/GNAS/MBD3	6
GO:0007223	Wnt signaling pathway, calcium modulating pathway	6/1705	38/16374	0.198695	0.635462	0.561263	PPP3CB/GNB1/FZD3/GNAO1/GNG2/CALM1	6
GO:0030501	positive regulation of bone mineralization	6/1705	38/16374	0.198695	0.635462	0.561263	FAM20C/ACVR2A/SLC8A1/P2RX7/ATP2B1/ISG15	6
GO:0033173	calcineurin-NFAT signaling cascade	6/1705	38/16374	0.198695	0.635462	0.561263	PPP3CB/PTBP1/ADGRB2/CHP1/NRG1/PRNP	6
GO:0033683	nucleotide-excision repair, DNA incision	6/1705	38/16374	0.198695	0.635462	0.561263	DDB1/RBX1/POLD2/PARP1/UBC/UBB	6
GO:0043666	regulation of phosphoprotein phosphatase activity	6/1705	38/16374	0.198695	0.635462	0.561263	DMPK/PTPA/PPP2R1A/PPP2R2C/B3GAT3/HSP90B1	6
GO:0001660	fever generation	2/1705	8/16374	0.199238	0.635462	0.561263	EDNRB/CNR1	2
GO:0001841	neural tube formation	2/1705	8/16374	0.199238	0.635462	0.561263	SOX4/SOX11	2
GO:0003084	positive regulation of systemic arterial blood pressure	2/1705	8/16374	0.199238	0.635462	0.561263	WNK1/NR2F2	2
GO:0003413	chondrocyte differentiation involved in endochondral bone morphogenesis	2/1705	8/16374	0.199238	0.635462	0.561263	SERPINH1/SOX9	2
GO:0007270	neuron-neuron synaptic transmission	2/1705	8/16374	0.199238	0.635462	0.561263	VDAC1/TMOD2	2
GO:0009268	response to pH	2/1705	8/16374	0.199238	0.635462	0.561263	CLCN7/CA2	2
GO:0009629	response to gravity	2/1705	8/16374	0.199238	0.635462	0.561263	PKM/SPARC	2
GO:0014908	myotube differentiation involved in skeletal muscle regeneration	2/1705	8/16374	0.199238	0.635462	0.561263	CD9/CD81	2
GO:0019885	antigen processing and presentation of endogenous peptide antigen via MHC class I	2/1705	8/16374	0.199238	0.635462	0.561263	TAPBP/B2M	2
GO:0021548	pons development	2/1705	8/16374	0.199238	0.635462	0.561263	GRIN1/UQCRQ	2
GO:0021702	cerebellar Purkinje cell differentiation	2/1705	8/16374	0.199238	0.635462	0.561263	HERC1/AGTPBP1	2
GO:0021795	cerebral cortex cell migration	2/1705	8/16374	0.199238	0.635462	0.561263	RHOA/FGF13	2
GO:0030916	otic vesicle formation	2/1705	8/16374	0.199238	0.635462	0.561263	FGFR2/SOX9	2
GO:0031503	protein-containing complex localization	2/1705	8/16374	0.199238	0.635462	0.561263	NPTN/FKBP4	2
GO:0031958	corticosteroid receptor signaling pathway	2/1705	8/16374	0.199238	0.635462	0.561263	LMO3/PHB	2
GO:0032528	microvillus organization	2/1705	8/16374	0.199238	0.635462	0.561263	PTPN11/RAP1GAP	2
GO:0033522	histone H2A ubiquitination	2/1705	8/16374	0.199238	0.635462	0.561263	UBE2B/OTUB1	2
GO:0033629	negative regulation of cell adhesion mediated by integrin	2/1705	8/16374	0.199238	0.635462	0.561263	PTPN11/PDE3B	2
GO:0035696	monocyte extravasation	2/1705	8/16374	0.199238	0.635462	0.561263	CD47/SIRPA	2
GO:0036289	peptidyl-serine autophosphorylation	2/1705	8/16374	0.199238	0.635462	0.561263	MAP2K2/PINK1	2
GO:0043497	regulation of protein heterodimerization activity	2/1705	8/16374	0.199238	0.635462	0.561263	BAX/NRG1	2
GO:0044387	negative regulation of protein kinase activity by regulation of protein phosphorylation	2/1705	8/16374	0.199238	0.635462	0.561263	NPM1/CDK5RAP3	2
GO:0045823	positive regulation of heart contraction	2/1705	8/16374	0.199238	0.635462	0.561263	PDE4D/ATP1A1	2
GO:0045851	pH reduction	2/1705	8/16374	0.199238	0.635462	0.561263	CA2/ATP6AP1	2
GO:0046548	retinal rod cell development	2/1705	8/16374	0.199238	0.635462	0.561263	NTRK2/TOPORS	2
GO:0047497	mitochondrion transport along microtubule	2/1705	8/16374	0.199238	0.635462	0.561263	MAP1B/UBB	2
GO:0048102	autophagic cell death	2/1705	8/16374	0.199238	0.635462	0.561263	LAMP1/BNIP3	2
GO:0048227	plasma membrane to endosome transport	2/1705	8/16374	0.199238	0.635462	0.561263	SORT1/RAB35	2
GO:0048539	bone marrow development	2/1705	8/16374	0.199238	0.635462	0.561263	CTC1/SBDS	2
GO:0050810	regulation of steroid biosynthetic process	2/1705	8/16374	0.199238	0.635462	0.561263	IGFBP7/ASAH1	2
GO:0050847	progesterone receptor signaling pathway	2/1705	8/16374	0.199238	0.635462	0.561263	WBP2/PHB	2
GO:0051014	actin filament severing	2/1705	8/16374	0.199238	0.635462	0.561263	GSN/DSTN	2
GO:0051304	chromosome separation	2/1705	8/16374	0.199238	0.635462	0.561263	CSNK2A1/NUMA1	2
GO:0060253	negative regulation of glial cell proliferation	2/1705	8/16374	0.199238	0.635462	0.561263	IDH2/SOX11	2
GO:0060316	positive regulation of ryanodine-sensitive calcium-release channel activity	2/1705	8/16374	0.199238	0.635462	0.561263	CALM3/CALM1	2
GO:0060478	acrosomal vesicle exocytosis	2/1705	8/16374	0.199238	0.635462	0.561263	STXBP1/RIMS1	2
GO:0060561	apoptotic process involved in morphogenesis	2/1705	8/16374	0.199238	0.635462	0.561263	TNFRSF1A/CRYAB	2
GO:0061669	spontaneous neurotransmitter secretion	2/1705	8/16374	0.199238	0.635462	0.561263	SYT1/RIMS2	2
GO:0070613	regulation of protein processing	2/1705	8/16374	0.199238	0.635462	0.561263	PRKACB/RNF139	2
GO:0071467	cellular response to pH	2/1705	8/16374	0.199238	0.635462	0.561263	GJA1/GNA11	2
GO:0071514	genetic imprinting	2/1705	8/16374	0.199238	0.635462	0.561263	GNAS/TRIM28	2
GO:0071806	protein transmembrane transport	2/1705	8/16374	0.199238	0.635462	0.561263	TOMM70/SEC61G	2
GO:0071880	adenylate cyclase-activating adrenergic receptor signaling pathway	2/1705	8/16374	0.199238	0.635462	0.561263	RAPGEF2/GNAI2	2
GO:0072503	cellular divalent inorganic cation homeostasis	2/1705	8/16374	0.199238	0.635462	0.561263	CALR/HSP90B1	2
GO:0090140	regulation of mitochondrial fission	2/1705	8/16374	0.199238	0.635462	0.561263	MAPT/INF2	2
GO:0097113	AMPA glutamate receptor clustering	2/1705	8/16374	0.199238	0.635462	0.561263	DLG4/APOE	2
GO:0098976	excitatory chemical synaptic transmission	2/1705	8/16374	0.199238	0.635462	0.561263	GRIN2A/GRIN1	2
GO:0099084	postsynaptic specialization organization	2/1705	8/16374	0.199238	0.635462	0.561263	NLGN2/NRXN2	2
GO:0099527	postsynapse to nucleus signaling pathway	2/1705	8/16374	0.199238	0.635462	0.561263	RELA/NRG1	2
GO:0140353	lipid export from cell	2/1705	8/16374	0.199238	0.635462	0.561263	P2RX7/ATP5PF	2
GO:0150012	positive regulation of neuron projection arborization	2/1705	8/16374	0.199238	0.635462	0.561263	DLG4/DVL1	2
GO:1902305	regulation of sodium ion transmembrane transport	2/1705	8/16374	0.199238	0.635462	0.561263	SNTA1/FGF12	2
GO:1904953	Wnt signaling pathway involved in midbrain dopaminergic neuron differentiation	2/1705	8/16374	0.199238	0.635462	0.561263	CSNK1D/CSNK1E	2
GO:1905168	positive regulation of double-strand break repair via homologous recombination	2/1705	8/16374	0.199238	0.635462	0.561263	ACTR2/PARP1	2
GO:0000002	mitochondrial genome maintenance	3/1705	15/16374	0.200123	0.635462	0.561263	SLC25A36/PARP1/SLC25A4	3
GO:0001504	neurotransmitter uptake	3/1705	15/16374	0.200123	0.635462	0.561263	ATP1A2/GLUL/ARL6IP5	3
GO:0007076	mitotic chromosome condensation	3/1705	15/16374	0.200123	0.635462	0.561263	AKAP8L/CHMP1A/NCAPH2	3
GO:0010717	regulation of epithelial to mesenchymal transition	3/1705	15/16374	0.200123	0.635462	0.561263	DAG1/POFUT2/MCRIP1	3
GO:0010765	positive regulation of sodium ion transport	3/1705	15/16374	0.200123	0.635462	0.561263	AKT1/FGF12/ANK3	3
GO:0010955	negative regulation of protein processing	3/1705	15/16374	0.200123	0.635462	0.561263	TMEM59/TMEM98/PRNP	3
GO:0030517	negative regulation of axon extension	3/1705	15/16374	0.200123	0.635462	0.561263	PTPRS/RTN4/MT3	3
GO:0044320	cellular response to leptin stimulus	3/1705	15/16374	0.200123	0.635462	0.561263	UGCG/ADIPOR1/MT3	3
GO:0045292	mRNA cis splicing, via spliceosome	3/1705	15/16374	0.200123	0.635462	0.561263	SNRNP200/PSIP1/NCBP2	3
GO:0045664	regulation of neuron differentiation	3/1705	15/16374	0.200123	0.635462	0.561263	CDK5RAP3/YWHAG/YWHAH	3
GO:0045948	positive regulation of translational initiation	3/1705	15/16374	0.200123	0.635462	0.561263	KHDRBS1/DDX3X/RPS6KB2	3
GO:0048026	positive regulation of mRNA splicing, via spliceosome	3/1705	15/16374	0.200123	0.635462	0.561263	SNRNP70/PRPF19/HSPA8	3
GO:0050884	neuromuscular process controlling posture	3/1705	15/16374	0.200123	0.635462	0.561263	SCN1A/TMEM150C/GAA	3
GO:0061001	regulation of dendritic spine morphogenesis	3/1705	15/16374	0.200123	0.635462	0.561263	ABI2/EPHA4/SRCIN1	3
GO:0070050	neuron cellular homeostasis	3/1705	15/16374	0.200123	0.635462	0.561263	DNAJB2/NELL2/MAP1A	3
GO:0071218	cellular response to misfolded protein	3/1705	15/16374	0.200123	0.635462	0.561263	DERL1/BAG6/STUB1	3
GO:0071280	cellular response to copper ion	3/1705	15/16374	0.200123	0.635462	0.561263	BACE1/APP/PRNP	3
GO:0071380	cellular response to prostaglandin E stimulus	3/1705	15/16374	0.200123	0.635462	0.561263	GNB1/GNG2/AKT1	3
GO:1901362	organic cyclic compound biosynthetic process	3/1705	15/16374	0.200123	0.635462	0.561263	IGFBP7/ASAH1/INSIG1	3
GO:1903513	endoplasmic reticulum to cytosol transport	3/1705	15/16374	0.200123	0.635462	0.561263	OS9/BRSK2/BCAP31	3
GO:2000737	negative regulation of stem cell differentiation	3/1705	15/16374	0.200123	0.635462	0.561263	HNRNPU/ZFP36L2/NELFB	3
GO:0002040	sprouting angiogenesis	10/1705	71/16374	0.200849	0.636968	0.562592	MIA3/NRP1/GLUL/AKT1/PKM/SLIT2/EPN1/CEMIP2/JMJD6/EFNB2	10
GO:0042795	snRNA transcription by RNA polymerase II	10/1705	71/16374	0.200849	0.636968	0.562592	POLR2B/POLR2A/GTF2A2/INTS1/PHAX/NCBP2/TAF13/POLR2E/GTF2F1/POLR2L	10
GO:0030336	negative regulation of cell migration	14/1705	105/16374	0.201245	0.637821	0.563346	MIA3/TPM1/DPYSL3/NISCH/DAG1/TCAF1/SEPT7/DLC1/SLIT2/RNF41/RAP2A/DUSP3/ADAM15/PTPRT	14
GO:0017144	drug metabolic process	9/1705	63/16374	0.205368	0.650483	0.57453	ENO1/SELENOS/MT-CO2/MAOB/PARP1/CBR1/PINK1/TMSB4X/MT3	9
GO:0030099	myeloid cell differentiation	23/1705	184/16374	0.205525	0.650571	0.574607	PTPN11/ARID4A/PURB/ZFP36L1/WDR5/ACVR2A/KLF13/PABPC4/P4HTM/RNF41/RBM15/H3F3B/RPS6/NFKBIA/JMJD6/PRMT1/ID2/HIST1H4C/HSPA1B/B2M/ISG15/HSPA1A/PRKCB	23
GO:0002790	peptide secretion	11/1705	80/16374	0.207576	0.656653	0.579979	EZR/ARF1/ERP29/HMGCR/PPIA/APOE/ATP13A2/APBB1/FRMD4A/SYT4/SRCIN1	11
GO:0001654	eye development	20/1705	158/16374	0.208813	0.660151	0.583069	GNB1/LPCAT1/HDAC2/YY1/RING1/MFN2/JUN/HIPK1/NTRK2/PFDN5/CRYAB/JMJD6/GJA1/SOX9/BAX/CST3/RPL24/SOX11/IMPDH2/TENM3	20
GO:0031929	TOR signaling	14/1705	106/16374	0.211199	0.667277	0.589363	LARP1/CCDC88A/LAMTOR1/SESN3/AKT1/RRAGC/STK11/RPS6KB2/RPS6/PIH1D1/LAMTOR4/GAS6/LAMTOR5/DDIT4	14
GO:0007050	cell cycle arrest	22/1705	176/16374	0.21185	0.668916	0.59081	DDIT3/PLAGL1/LAMTOR1/HEPACAM/SKIL/PRKAB2/PPM1G/EIF4G2/GAS7/RRAGC/STK11/RPL23/BRINP1/APBB1/LAMTOR4/ID2/HSP90AB1/GAS6/LAMTOR5/PPP1R15A/CALR/PRNP	22
GO:0006904	vesicle docking involved in exocytosis	4/1705	23/16374	0.212726	0.669173	0.591037	STXBP3/STXBP1/YKT6/VAMP3	4
GO:0006929	substrate-dependent cell migration	4/1705	23/16374	0.212726	0.669173	0.591037	NRP1/SDCBP/ATP5F1B/SHTN1	4
GO:0021522	spinal cord motor neuron differentiation	4/1705	23/16374	0.212726	0.669173	0.591037	NFE2L1/LMO4/SOX4/MDGA2	4
GO:0030866	cortical actin cytoskeleton organization	4/1705	23/16374	0.212726	0.669173	0.591037	TLN1/EPB41L3/EPB41L1/CALR	4
GO:0051882	mitochondrial depolarization	4/1705	23/16374	0.212726	0.669173	0.591037	RACK1/P2RX7/PARP1/ATP5IF1	4
GO:0061138	morphogenesis of a branching epithelium	4/1705	23/16374	0.212726	0.669173	0.591037	NRP1/FGFR2/SOX9/SEMA3C	4
GO:0003407	neural retina development	7/1705	47/16374	0.213169	0.669732	0.591531	SMARCD3/HIPK1/TOPORS/ATP2B1/DSCAM/FJX1/RAB11FIP4	7
GO:0021953	central nervous system neuron differentiation	7/1705	47/16374	0.213169	0.669732	0.591531	MAPT/RAPGEF2/SLC4A10/FGFR2/NTRK2/PLXNA3/UQCRQ	7
GO:0016311	dephosphorylation	15/1705	115/16374	0.214669	0.671851	0.593402	PPP3CB/IMPAD1/DLC1/PGP/PTPA/PTBP1/DUSP3/PIN1/ATP1A1/YWHAB/PPP1R15A/CALM3/NSMF/PINK1/CALM1	15
GO:0032606	type I interferon production	15/1705	115/16374	0.214669	0.671851	0.593402	PTPN11/PTPRS/DDX3X/HSPD1/XRCC6/YY1/REL/SIRPA/POLR2E/RELA/DTX4/PIN1/IRAK1/ISG15/POLR2L	15
GO:0000186	activation of MAPKK activity	6/1705	39/16374	0.215693	0.671851	0.593402	MAPK1/MAP3K2/KIDINS220/CRK/CRKL/GADD45B	6
GO:0006354	DNA-templated transcription, elongation	6/1705	39/16374	0.215693	0.671851	0.593402	HNRNPU/SUPT16H/RTF1/NELFB/TCEA2/GTF2F1	6
GO:0030049	muscle filament sliding	6/1705	39/16374	0.215693	0.671851	0.593402	TPM1/TPM4/TPM3/MYL6B/VIM/MYL6	6
GO:0051261	protein depolymerization	6/1705	39/16374	0.215693	0.671851	0.593402	HDGFL3/WDR1/STMN2/FGF13/DSTN/MAP1B	6
GO:0090382	phagosome maturation	6/1705	39/16374	0.215693	0.671851	0.593402	ATP6V1B2/ATP6V1G1/P2RX7/SYT11/ATP6V0D1/ATP6V0B	6
GO:0001655	urogenital system development	5/1705	31/16374	0.216209	0.671851	0.593402	ITGA6/CRKL/FKBP4/ITGB4/SOX9	5
GO:0002027	regulation of heart rate	5/1705	31/16374	0.216209	0.671851	0.593402	PDE4D/SNTA1/SLC8A1/CALM3/CALM1	5
GO:0030534	adult behavior	5/1705	31/16374	0.216209	0.671851	0.593402	PCDH17/MAFG/CNTNAP2/NRXN2/SHANK2	5
GO:0038128	ERBB2 signaling pathway	5/1705	31/16374	0.216209	0.671851	0.593402	HSP90AA1/CPNE3/GRB2/STUB1/NRG1	5
GO:0055013	cardiac muscle cell development	5/1705	31/16374	0.216209	0.671851	0.593402	HNRNPU/SGCB/SLC8A1/OBSL1/SORBS2	5
GO:0097345	mitochondrial outer membrane permeabilization	5/1705	31/16374	0.216209	0.671851	0.593402	CHCHD10/BNIP3/BAX/HSPA1A/ATP5IF1	5
GO:0140053	mitochondrial gene expression	5/1705	31/16374	0.216209	0.671851	0.593402	MRPS21/MRPS18B/TFAM/MRPL51/MRPS34	5
GO:0051291	protein heterooligomerization	9/1705	64/16374	0.218551	0.671851	0.593402	STXBP3/SQSTM1/GRB2/SEPT9/SEPT7/TMEM120A/GLRB/SYT1/YWHAB	9
GO:0001837	epithelial to mesenchymal transition	14/1705	107/16374	0.221365	0.671851	0.593402	DDX17/DDX5/STRAP/DAG1/HDAC2/FGFR2/SDCBP/POFUT2/HNRNPAB/ADIPOR1/SOX9/TRIM28/MCRIP1/OLFM1	14
GO:0006836	neurotransmitter transport	8/1705	56/16374	0.223888	0.671851	0.593402	DNAJC5/SYNJ1/GABRA2/P2RX7/SYT11/KCNMB4/UNC13A/RIMS1	8
GO:0045445	myoblast differentiation	10/1705	73/16374	0.225595	0.671851	0.593402	DDX17/DDX5/DDIT3/ZFP36L1/AKIRIN1/BTG1/HMGCR/SOX9/ID3/LGALS1	10
GO:0008584	male gonad development	16/1705	125/16374	0.227109	0.671851	0.593402	ATRX/CSDE1/EIF2S2/TMF1/ADGRG1/HMGCS1/ACVR2A/CRKL/NCOA4/H3F3B/ADAM15/GJA1/SOX9/BAX/NUPR1/UBB	16
GO:0006622	protein targeting to lysosome	3/1705	16/16374	0.228515	0.671851	0.593402	SCARB2/SORL1/NCOA4	3
GO:0008033	tRNA processing	3/1705	16/16374	0.228515	0.671851	0.593402	TYW1B/SSB/GRSF1	3
GO:0010633	negative regulation of epithelial cell migration	3/1705	16/16374	0.228515	0.671851	0.593402	STRAP/PTPN23/ADIPOR1	3
GO:0010875	positive regulation of cholesterol efflux	3/1705	16/16374	0.228515	0.671851	0.593402	PLTP/NFKBIA/APOE	3
GO:0010934	macrophage cytokine production	3/1705	16/16374	0.228515	0.671851	0.593402	GPRC5B/CUEDC2/GAS6	3
GO:0019229	regulation of vasoconstriction	3/1705	16/16374	0.228515	0.671851	0.593402	ATP1A2/KCNMB4/ASIC2	3
GO:0019430	removal of superoxide radicals	3/1705	16/16374	0.228515	0.671851	0.593402	SOD1/DHFR/MT3	3
GO:0030042	actin filament depolymerization	3/1705	16/16374	0.228515	0.671851	0.593402	WDR1/DSTN/MICAL2	3
GO:0031643	positive regulation of myelination	3/1705	16/16374	0.228515	0.671851	0.593402	RNF10/DAG1/S100B	3
GO:0032012	regulation of ARF protein signal transduction	3/1705	16/16374	0.228515	0.671851	0.593402	IQSEC1/ARFGEF3/PSD	3
GO:0032874	positive regulation of stress-activated MAPK cascade	3/1705	16/16374	0.228515	0.671851	0.593402	STK25/HMGCR/ARL6IP5	3
GO:0035970	peptidyl-threonine dephosphorylation	3/1705	16/16374	0.228515	0.671851	0.593402	PPP2CB/PPM1E/PPM1G	3
GO:0036149	phosphatidylinositol acyl-chain remodeling	3/1705	16/16374	0.228515	0.671851	0.593402	PLA2G4C/PLA2G16/MBOAT7	3
GO:0039692	single stranded viral RNA replication via double stranded DNA intermediate	3/1705	16/16374	0.228515	0.671851	0.593402	TOP2B/FAM208A/TRIM28	3
GO:0042176	regulation of protein catabolic process	3/1705	16/16374	0.228515	0.671851	0.593402	ODC1/PSMD3/PSMD2	3
GO:0043122	regulation of I-kappaB kinase/NF-kappaB signaling	3/1705	16/16374	0.228515	0.671851	0.593402	SQSTM1/CPNE1/HSPB1	3
GO:0043604	amide biosynthetic process	3/1705	16/16374	0.228515	0.671851	0.593402	SAMD8/TNFRSF1A/RACK1	3
GO:0050870	positive regulation of T cell activation	3/1705	16/16374	0.228515	0.671851	0.593402	FAM49B/CD47/HSPD1	3
GO:0060008	Sertoli cell differentiation	3/1705	16/16374	0.228515	0.671851	0.593402	ATRX/SOX9/CST3	3
GO:0061377	mammary gland lobule development	3/1705	16/16374	0.228515	0.671851	0.593402	DDR1/PHB2/ID2	3
GO:1901379	regulation of potassium ion transmembrane transport	3/1705	16/16374	0.228515	0.671851	0.593402	DPP10/CD63/PRNP	3
GO:2000679	positive regulation of transcription regulatory region DNA binding	3/1705	16/16374	0.228515	0.671851	0.593402	PARK7/H1F0/PARP1	3
GO:0030168	platelet activation	18/1705	143/16374	0.231109	0.671851	0.593402	MAPK1/PTPN11/GNB1/STXBP3/GNG2/FLNA/TLN1/YWHAZ/STXBP1/CD9/DGKZ/APOE/GNA11/GNAS/GAS6/ACTB/HSPB1/PRKCB	18
GO:0098869	cellular oxidant detoxification	11/1705	82/16374	0.231196	0.671851	0.593402	FAM213A/MGST3/TXN/SELENOS/PARK7/SELENOT/GSTP1/APOE/SELENOW/GPX4/DHFR	11
GO:0042136	neurotransmitter biosynthetic process	9/1705	65/16374	0.232051	0.671851	0.593402	HSP90AA1/CD47/DDAH2/AKT1/CLU/SIRPA/KHSRP/RAC1/HSP90AB1	9
GO:0033036	macromolecule localization	15/1705	117/16374	0.23451	0.671851	0.593402	DNAJB6/MYCBP2/ESYT2/PDZD8/VPS51/APOO/SORL1/RACK1/SPNS1/LRP10/RAB14/PLIN2/RSL1D1/PLTP/PSAP	15
GO:0060079	excitatory postsynaptic potential	12/1705	91/16374	0.235697	0.671851	0.593402	BAIAP2/APP/NLGN2/AKT1/DLG4/P2RX7/GLRB/SEZ6/DVL1/GRIN1/RIMS1/RIMS2	12
GO:0010586	miRNA metabolic process	4/1705	24/16374	0.235824	0.671851	0.593402	DDX17/KHSRP/RELA/RAN	4
GO:0018345	protein palmitoylation	4/1705	24/16374	0.235824	0.671851	0.593402	GLUL/ABHD17B/ABHD17A/SELENOK	4
GO:0035235	ionotropic glutamate receptor signaling pathway	4/1705	24/16374	0.235824	0.671851	0.593402	APP/GRIA3/GRIN2A/GRIN1	4
GO:0042551	neuron maturation	4/1705	24/16374	0.235824	0.671851	0.593402	MTCH1/EDNRB/B4GALT6/PICK1	4
GO:0044728	DNA methylation or demethylation	4/1705	24/16374	0.235824	0.671851	0.593402	USP7/PARP1/TRIM28/MBD3	4
GO:0070296	sarcoplasmic reticulum calcium ion transport	4/1705	24/16374	0.235824	0.671851	0.593402	PDE4D/ATP2A2/CALM3/CALM1	4
GO:0097242	amyloid-beta clearance	4/1705	24/16374	0.235824	0.671851	0.593402	LRPAP1/CLU/HMGCR/APOE	4
GO:0006402	mRNA catabolic process	5/1705	32/16374	0.236003	0.671851	0.593402	RNH1/ZFP36L2/KHSRP/HSPA1B/HSPA1A	5
GO:0006487	protein N-linked glycosylation	5/1705	32/16374	0.236003	0.671851	0.593402	TMEM165/MGAT4B/DDOST/MGAT4A/MGAT3	5
GO:0007029	endoplasmic reticulum organization	5/1705	32/16374	0.236003	0.671851	0.593402	MIA3/TOR1AIP2/LNPK/SEC61A1/ATL1	5
GO:0036465	synaptic vesicle recycling	5/1705	32/16374	0.236003	0.671851	0.593402	GRIPAP1/SYNJ1/BTBD8/CANX/ACTB	5
GO:0048821	erythrocyte development	5/1705	32/16374	0.236003	0.671851	0.593402	ARID4A/PTBP3/ZBTB7A/RPS6/JMJD6	5
GO:0071354	cellular response to interleukin-6	5/1705	32/16374	0.236003	0.671851	0.593402	PTPN11/IL6ST/PTPRT/RELA/PHB	5
GO:0007193	adenylate cyclase-inhibiting G protein-coupled receptor signaling pathway	8/1705	57/16374	0.238554	0.671851	0.593402	GABBR1/GNAL/PALM/GNAI2/GNAI1/ADCY1/GPR37L1/ADCY5	8
GO:0043401	steroid hormone mediated signaling pathway	8/1705	57/16374	0.238554	0.671851	0.593402	CREBRF/PGRMC2/RHOA/NR2F1/ESRRA/NR2F2/CALR/THRA	8
GO:0045453	bone resorption	8/1705	57/16374	0.238554	0.671851	0.593402	ZNF675/P2RX7/PDK4/SNX10/RAC1/CSK/CA2/ATP6AP1	8
GO:0001188	RNA polymerase I preinitiation complex assembly	2/1705	9/16374	0.23942	0.671851	0.593402	PIH1D1/UBTF	2
GO:0003254	regulation of membrane depolarization	2/1705	9/16374	0.23942	0.671851	0.593402	FHL1/FGF12	2
GO:0006171	cAMP biosynthetic process	2/1705	9/16374	0.23942	0.671851	0.593402	ADCY1/ADCY5	2
GO:0006903	vesicle targeting	2/1705	9/16374	0.23942	0.671851	0.593402	TMED10/YKT6	2
GO:0007042	lysosomal lumen acidification	2/1705	9/16374	0.23942	0.671851	0.593402	PPT1/GRN	2
GO:0007617	mating behavior	2/1705	9/16374	0.23942	0.671851	0.593402	HDAC2/APP	2
GO:0010669	epithelial structure maintenance	2/1705	9/16374	0.23942	0.671851	0.593402	LDB2/CXADR	2
GO:0015732	prostaglandin transport	2/1705	9/16374	0.23942	0.671851	0.593402	P2RX7/ATP5PF	2
GO:0015908	fatty acid transport	2/1705	9/16374	0.23942	0.671851	0.593402	ACSL4/GOT2	2
GO:0015937	coenzyme A biosynthetic process	2/1705	9/16374	0.23942	0.671851	0.593402	PANK3/COASY	2
GO:0016999	antibiotic metabolic process	2/1705	9/16374	0.23942	0.671851	0.593402	RAC1/PINK1	2
GO:0019227	neuronal action potential propagation	2/1705	9/16374	0.23942	0.671851	0.593402	NTRK2/SCN1A	2
GO:0021694	cerebellar Purkinje cell layer formation	2/1705	9/16374	0.23942	0.671851	0.593402	HERC1/AGTPBP1	2
GO:0021884	forebrain neuron development	2/1705	9/16374	0.23942	0.671851	0.593402	RAPGEF2/NRP1	2
GO:0022417	protein maturation by protein folding	2/1705	9/16374	0.23942	0.671851	0.593402	ERO1B/CALR	2
GO:0032680	regulation of tumor necrosis factor production	2/1705	9/16374	0.23942	0.671851	0.593402	CD47/SIRPA	2
GO:0032933	SREBP signaling pathway	2/1705	9/16374	0.23942	0.671851	0.593402	ERLIN2/INSIG1	2
GO:0033194	response to hydroperoxide	2/1705	9/16374	0.23942	0.671851	0.593402	STX2/MT-ND1	2
GO:0034447	very-low-density lipoprotein particle clearance	2/1705	9/16374	0.23942	0.671851	0.593402	LRPAP1/APOE	2
GO:0035360	positive regulation of peroxisome proliferator activated receptor signaling pathway	2/1705	9/16374	0.23942	0.671851	0.593402	LMO3/FABP5	2
GO:0038166	angiotensin-activated signaling pathway	2/1705	9/16374	0.23942	0.671851	0.593402	AGTRAP/CA2	2
GO:0042423	catecholamine biosynthetic process	2/1705	9/16374	0.23942	0.671851	0.593402	VPS35/PARK7	2
GO:0043268	positive regulation of potassium ion transport	2/1705	9/16374	0.23942	0.671851	0.593402	KIF5B/FHL1	2
GO:0043281	regulation of cysteine-type endopeptidase activity involved in apoptotic process	2/1705	9/16374	0.23942	0.671851	0.593402	BEX3/EPHA7	2
GO:0043413	macromolecule glycosylation	2/1705	9/16374	0.23942	0.671851	0.593402	CHP1/MT3	2
GO:0045080	positive regulation of chemokine biosynthetic process	2/1705	9/16374	0.23942	0.671851	0.593402	APP/HMOX1	2
GO:0045722	positive regulation of gluconeogenesis	2/1705	9/16374	0.23942	0.671851	0.593402	DDB1/ARPP19	2
GO:0046394	carboxylic acid biosynthetic process	2/1705	9/16374	0.23942	0.671851	0.593402	CLTC/SUCLA2	2
GO:0046598	positive regulation of viral entry into host cell	2/1705	9/16374	0.23942	0.671851	0.593402	P4HB/LGALS1	2
GO:0048149	behavioral response to ethanol	2/1705	9/16374	0.23942	0.671851	0.593402	HDAC2/UNC79	2
GO:0050774	negative regulation of dendrite morphogenesis	2/1705	9/16374	0.23942	0.671851	0.593402	RAPGEF2/YWHAH	2
GO:0050931	pigment cell differentiation	2/1705	9/16374	0.23942	0.671851	0.593402	CD63/GNA11	2
GO:0055069	zinc ion homeostasis	2/1705	9/16374	0.23942	0.671851	0.593402	ATP13A2/MT3	2
GO:0060502	epithelial cell proliferation involved in lung morphogenesis	2/1705	9/16374	0.23942	0.671851	0.593402	FGFR2/SOX9	2
GO:0060512	prostate gland morphogenesis	2/1705	9/16374	0.23942	0.671851	0.593402	FGFR2/ID4	2
GO:0061549	sympathetic ganglion development	2/1705	9/16374	0.23942	0.671851	0.593402	FZD3/NRP1	2
GO:0070168	negative regulation of biomineral tissue development	2/1705	9/16374	0.23942	0.671851	0.593402	SOX9/GAS6	2
GO:0070417	cellular response to cold	2/1705	9/16374	0.23942	0.671851	0.593402	NFE2L1/NFKBIA	2
GO:0070970	interleukin-2 secretion	2/1705	9/16374	0.23942	0.671851	0.593402	EZR/SPTBN1	2
GO:0071225	cellular response to muramyl dipeptide	2/1705	9/16374	0.23942	0.671851	0.593402	CHMP5/VIM	2
GO:0071281	cellular response to iron ion	2/1705	9/16374	0.23942	0.671851	0.593402	HMOX1/B2M	2
GO:0071468	cellular response to acidic pH	2/1705	9/16374	0.23942	0.671851	0.593402	CHP1/RAB11B	2
GO:0071550	death-inducing signaling complex assembly	2/1705	9/16374	0.23942	0.671851	0.593402	TNFRSF1A/PARK7	2
GO:0071600	otic vesicle morphogenesis	2/1705	9/16374	0.23942	0.671851	0.593402	FGFR2/SOX9	2
GO:0071670	smooth muscle cell chemotaxis	2/1705	9/16374	0.23942	0.671851	0.593402	SLIT2/GSTP1	2
GO:0072321	chaperone-mediated protein transport	2/1705	9/16374	0.23942	0.671851	0.593402	CLIP3/TIMM13	2
GO:0086011	membrane repolarization during action potential	2/1705	9/16374	0.23942	0.671851	0.593402	FLNA/CACNA2D1	2
GO:0090129	positive regulation of synapse maturation	2/1705	9/16374	0.23942	0.671851	0.593402	ADGRL1/CAMK2B	2
GO:0097104	postsynaptic membrane assembly	2/1705	9/16374	0.23942	0.671851	0.593402	NLGN2/NRXN2	2
GO:0097119	postsynaptic density protein 95 clustering	2/1705	9/16374	0.23942	0.671851	0.593402	NLGN2/NRXN2	2
GO:0099010	modification of postsynaptic structure	2/1705	9/16374	0.23942	0.671851	0.593402	BAIAP2/RHOA	2
GO:1901699	cellular response to nitrogen compound	2/1705	9/16374	0.23942	0.671851	0.593402	NPM1/CRKL	2
GO:1903427	negative regulation of reactive oxygen species biosynthetic process	2/1705	9/16374	0.23942	0.671851	0.593402	PARK7/RHOA	2
GO:1903715	regulation of aerobic respiration	2/1705	9/16374	0.23942	0.671851	0.593402	NOP53/BNIP3	2
GO:1905288	vascular associated smooth muscle cell apoptotic process	2/1705	9/16374	0.23942	0.671851	0.593402	MFN2/ATF4	2
GO:1990416	cellular response to brain-derived neurotrophic factor stimulus	2/1705	9/16374	0.23942	0.671851	0.593402	MAPT/WASF1	2
GO:0060218	hematopoietic stem cell differentiation	11/1705	83/16374	0.243381	0.671851	0.593402	PSMC6/PSMB1/PSMD3/PSMD7/PSMB4/PSMD8/PSMD2/PSMB5/PSMA7/PSMA4/PSMB3	11
GO:0032956	regulation of actin cytoskeleton organization	7/1705	49/16374	0.244972	0.671851	0.593402	BAIAP2/CCDC88A/CRK/DLC1/RHOA/EPHA5/FAM107A	7
GO:0060395	SMAD protein signal transduction	7/1705	49/16374	0.244972	0.671851	0.593402	LNPEP/SPTBN1/SUB1/JUN/PARP1/VIM/TOB1	7
GO:0006809	nitric oxide biosynthetic process	9/1705	66/16374	0.245844	0.671851	0.593402	HSP90AA1/CD47/DDAH2/AKT1/CLU/SIRPA/KHSRP/RAC1/HSP90AB1	9
GO:0071396	cellular response to lipid	12/1705	92/16374	0.247345	0.671851	0.593402	MAPK1/MTDH/PGRMC2/AKT1/NR2F1/CLU/ESRRA/NR2F2/NFKBIA/INSIG1/IRAK1/THRA	12
GO:0043547	positive regulation of GTPase activity	35/1705	298/16374	0.248961	0.671851	0.593402	RANBP2/RAPGEF2/MAPRE2/MYO9B/HACD3/CHN1/ZC3H15/GNAO1/ITGA6/ARFGAP1/NRP1/IQSEC1/RALBP1/SYNGAP1/RACK1/DLC1/JUN/AGAP3/CDKL5/ACAP3/ARHGAP23/SEMA4D/ADAP2/SMAP2/GDI1/DOCK9/EVI5L/RANBP1/ARHGAP44/PIN1/S100A10/GIT1/RAP1GAP/STXBP5L/ARHGDIA	35
GO:1901137	carbohydrate derivative biosynthetic process	10/1705	75/16374	0.251442	0.671851	0.593402	EXTL3/DAD1/DDOST/B3GAT2/B3GAT1/ST6GAL2/ST8SIA4/B4GALT6/B3GAT3/ST6GALNAC5	10
GO:0030029	actin filament-based process	14/1705	110/16374	0.253044	0.671851	0.593402	BAIAP2/CCDC88A/CRK/ARF1/CDC42/PRKCI/DLC1/RHOA/TMSB10/EPHA5/SORBS2/BRK1/FAM107A/TMSB4X	14
GO:0021549	cerebellum development	8/1705	58/16374	0.253535	0.671851	0.593402	PTPRS/CRK/MT-CO1/CRKL/PAK1/MT-ND4/SDF4/CKB	8
GO:0007009	plasma membrane organization	5/1705	33/16374	0.256271	0.671851	0.593402	BAIAP2/SPTBN1/ATP2A2/FAT4/ANK3	5
GO:0043029	T cell homeostasis	5/1705	33/16374	0.256271	0.671851	0.593402	PPP3CB/AKT1/P2RX7/RPS6/BAX	5
GO:0043403	skeletal muscle tissue regeneration	5/1705	33/16374	0.256271	0.671851	0.593402	DAG1/MTPN/AKIRIN1/PKM/GJA1	5
GO:0099072	regulation of postsynaptic membrane neurotransmitter receptor levels	5/1705	33/16374	0.256271	0.671851	0.593402	YWHAE/PRKCI/DAG1/CPT1C/EFNB2	5
GO:1904707	positive regulation of vascular smooth muscle cell proliferation	5/1705	33/16374	0.256271	0.671851	0.593402	MEF2D/MFN2/PAK1/JUN/GNAI2	5
GO:0001736	establishment of planar polarity	3/1705	17/16374	0.257588	0.671851	0.593402	FZD3/BRSK2/BRSK1	3
GO:0003215	cardiac right ventricle morphogenesis	3/1705	17/16374	0.257588	0.671851	0.593402	SMARCD3/SOX4/SEMA3C	3
GO:0007095	mitotic G2 DNA damage checkpoint	3/1705	17/16374	0.257588	0.671851	0.593402	CDK5RAP3/BRSK1/NOP53	3
GO:0009914	hormone transport	3/1705	17/16374	0.257588	0.671851	0.593402	PTPN11/SOX11/SCG5	3
GO:0010812	negative regulation of cell-substrate adhesion	3/1705	17/16374	0.257588	0.671851	0.593402	RHOA/PTPRO/LGALS1	3
GO:0010880	regulation of release of sequestered calcium ion into cytosol by sarcoplasmic reticulum	3/1705	17/16374	0.257588	0.671851	0.593402	PDE4D/CALM3/CALM1	3
GO:0032793	positive regulation of CREB transcription factor activity	3/1705	17/16374	0.257588	0.671851	0.593402	LRP8/EPHA5/ADCY1	3
GO:0033962	cytoplasmic mRNA processing body assembly	3/1705	17/16374	0.257588	0.671851	0.593402	DDX6/DYNC1H1/CNOT6L	3
GO:0035729	cellular response to hepatocyte growth factor stimulus	3/1705	17/16374	0.257588	0.671851	0.593402	NRP1/LGMN/RELA	3
GO:0043523	regulation of neuron apoptotic process	3/1705	17/16374	0.257588	0.671851	0.593402	LANCL1/PARK7/NSMF	3
GO:0043651	linoleic acid metabolic process	3/1705	17/16374	0.257588	0.671851	0.593402	FADS1/GSTP1/FADS2	3
GO:0045777	positive regulation of blood pressure	3/1705	17/16374	0.257588	0.671851	0.593402	CNR1/ID2/ATP5PF	3
GO:0045926	negative regulation of growth	3/1705	17/16374	0.257588	0.671851	0.593402	MT2A/MT1X/MT1E	3
GO:0046457	prostanoid biosynthetic process	3/1705	17/16374	0.257588	0.671851	0.593402	PTGES3/FABP5/CBR1	3
GO:0050665	hydrogen peroxide biosynthetic process	3/1705	17/16374	0.257588	0.671851	0.593402	MT-CO2/MAOB/SOD1	3
GO:0060740	prostate gland epithelium morphogenesis	3/1705	17/16374	0.257588	0.671851	0.593402	FGFR2/ID4/SOX9	3
GO:0086012	membrane depolarization during cardiac muscle cell action potential	3/1705	17/16374	0.257588	0.671851	0.593402	ATP1A2/SLC8A1/ANK3	3
GO:1900016	negative regulation of cytokine production involved in inflammatory response	3/1705	17/16374	0.257588	0.671851	0.593402	SIRPA/CHID1/CUEDC2	3
GO:0034612	response to tumor necrosis factor	17/1705	137/16374	0.257926	0.671851	0.593402	PSMC6/TNFRSF1A/PSMB1/PSMD3/PSMD7/PSMB4/PSMD8/PSMD2/PSMB5/CDIP1/PSMA7/PSMA4/NFKBIA/BAG4/PSMB3/RELA/TMSB4X	17
GO:0006851	mitochondrial calcium ion transmembrane transport	4/1705	25/16374	0.259476	0.671851	0.593402	VDAC1/SLC25A23/PHB2/PHB	4
GO:0007212	dopamine receptor signaling pathway	4/1705	25/16374	0.259476	0.671851	0.593402	VPS35/PALM/CALY/NSG2	4
GO:0009755	hormone-mediated signaling pathway	4/1705	25/16374	0.259476	0.671851	0.593402	PTPN11/CREBRF/ADIPOR1/THRA	4
GO:0045859	regulation of protein kinase activity	4/1705	25/16374	0.259476	0.671851	0.593402	DUSP3/PTPRT/SOD1/TSPYL2	4
GO:0048468	cell development	26/1705	218/16374	0.260269	0.671851	0.593402	VAPA/HERC1/HDGFL3/MAPT/RAPGEF2/GNAO1/APP/BTBD8/WDR5/ATP2A2/ULK1/MICALL2/APOE/CNTNAP2/GJA1/RAB35/SOX9/PRMT1/ID2/B4GALT6/STX3/CSPG5/CLMN/PSD/STMN3/OPCML	26
GO:0031214	biomineral tissue development	13/1705	102/16374	0.261872	0.671851	0.593402	FAM20C/SPP1/ACVR2A/ANKH/ATF4/SLC8A1/P2RX7/ATP2B1/GJA1/SOX9/CEBPB/GAS6/ISG15	13
GO:0009749	response to glucose	10/1705	76/16374	0.264732	0.671851	0.593402	SARM1/SELENOS/GLUL/RHOA/SELENOT/PFKL/SLC8A1/PTPRN2/GJA1/RAB11B	10
GO:0007519	skeletal muscle tissue development	15/1705	120/16374	0.265588	0.671851	0.593402	DNER/MEF2D/RHOA/EMD/HMGCR/NR2F2/MAFF/ATF3/MYL6B/COL19A1/NUPR1/HOMER1/SOX11/MYL6/ZBTB18	15
GO:0030032	lamellipodium assembly	8/1705	59/16374	0.268799	0.671851	0.593402	ARPC2/CCDC88A/CDC42/AKIRIN1/SLIT2/RAC1/PTPRO/BRK1	8
GO:0048863	stem cell differentiation	19/1705	156/16374	0.268881	0.671851	0.593402	OCIAD1/HNRNPU/PSMC6/PSMB1/ZFP36L2/PSMD3/PSMD7/NOLC1/NELFB/PSMB4/PSMD8/PSMD2/PSMB5/PSMA7/PSMA4/SOX9/PSMB3/SOX11/NRG1	19
GO:0034198	cellular response to amino acid starvation	6/1705	42/16374	0.269303	0.671851	0.593402	MAPK1/SESN3/SLC38A2/ATF4/RRAGC/ATF3	6
GO:0061061	muscle structure development	6/1705	42/16374	0.269303	0.671851	0.593402	DDX17/DDX5/SMARCD3/HMGCR/H3F3B/LGALS1	6
GO:0007229	integrin-mediated signaling pathway	12/1705	94/16374	0.271246	0.671851	0.593402	PTPN11/CD47/CDC42/ITGA6/FLNA/NRP1/TLN1/ADAM15/CD63/TIMP1/ISG15/PLP1	12
GO:1990830	cellular response to leukemia inhibitory factor	12/1705	94/16374	0.271246	0.671851	0.593402	BCLAF1/HNRNPU/TLE4/SMARCA5/CACYBP/SRM/EIF4A2/SNX10/SYNGR1/NCL/SPOCK2/TWISTNB	12
GO:0010573	vascular endothelial growth factor production	5/1705	34/16374	0.276935	0.671851	0.593402	IL6ST/ADGRG1/NDRG2/ATF4/ADAMTS3	5
GO:0042059	negative regulation of epidermal growth factor receptor signaling pathway	5/1705	34/16374	0.276935	0.671851	0.593402	CDC42/GRB2/SH3KBP1/EPN1/DUSP3	5
GO:0043276	anoikis	5/1705	34/16374	0.276935	0.671851	0.593402	AKT1/NTRK2/PDK4/STK11/AES	5
GO:0043407	negative regulation of MAP kinase activity	5/1705	34/16374	0.276935	0.671851	0.593402	CDK5RAP3/SORL1/HMGCR/GSTP1/APOE	5
GO:0120039	plasma membrane bounded cell projection morphogenesis	5/1705	34/16374	0.276935	0.671851	0.593402	ALCAM/DDR1/CPNE1/PLXNA3/EPHA4	5
GO:0031589	cell-substrate adhesion	22/1705	184/16374	0.277865	0.671851	0.593402	ARPC2/CRK/CDC42/ITGA6/DAG1/FLNA/NRP1/CRKL/DLC1/RHOA/TTYH1/CSF1/RAC1/ADAM15/SPOCK2/PTPRO/S100A10/GAS6/CSPG5/DOCK5/CALR/LGALS1	22
GO:0007179	transforming growth factor beta receptor signaling pathway	20/1705	166/16374	0.278262	0.671851	0.593402	ZNF451/STRAP/ZBTB7A/SDCBP/HTRA1/SKIL/JUN/GIPC1/RHOA/STK11/STUB1/PARP1/PIN1/HSP90AB1/HSPA5/SOX11/UBC/DKK3/UBB/HSPA1A	20
GO:0000338	protein deneddylation	2/1705	10/16374	0.27992	0.671851	0.593402	COPS6/GPS1	2
GO:0001845	phagolysosome assembly	2/1705	10/16374	0.27992	0.671851	0.593402	TMEM175/P2RX7	2
GO:0002209	behavioral defense response	2/1705	10/16374	0.27992	0.671851	0.593402	APOE/GJA1	2
GO:0003149	membranous septum morphogenesis	2/1705	10/16374	0.27992	0.671851	0.593402	FGFR2/ID2	2
GO:0009651	response to salt stress	2/1705	10/16374	0.27992	0.671851	0.593402	BAX/HSP90AB1	2
GO:0010944	negative regulation of transcription by competitive promoter binding	2/1705	10/16374	0.27992	0.671851	0.593402	BHLHE41/PHB	2
GO:0010998	regulation of translational initiation by eIF2 alpha phosphorylation	2/1705	10/16374	0.27992	0.671851	0.593402	NPM1/PPP1R15B	2
GO:0018027	peptidyl-lysine dimethylation	2/1705	10/16374	0.27992	0.671851	0.593402	EHMT2/PIH1D1	2
GO:0021587	cerebellum morphogenesis	2/1705	10/16374	0.27992	0.671851	0.593402	DAB1/HSPA5	2
GO:0031113	regulation of microtubule polymerization	2/1705	10/16374	0.27992	0.671851	0.593402	CAMSAP2/MAPT	2
GO:0032464	positive regulation of protein homooligomerization	2/1705	10/16374	0.27992	0.671851	0.593402	RACK1/CLU	2
GO:0032509	endosome transport via multivesicular body sorting pathway	2/1705	10/16374	0.27992	0.671851	0.593402	SORT1/LAPTM4B	2
GO:0033197	response to vitamin E	2/1705	10/16374	0.27992	0.671851	0.593402	SRSF2/HMGCS1	2
GO:0033762	response to glucagon	2/1705	10/16374	0.27992	0.671851	0.593402	MT-CYB/QDPR	2
GO:0034244	negative regulation of transcription elongation from RNA polymerase II promoter	2/1705	10/16374	0.27992	0.671851	0.593402	HNRNPU/NELFB	2
GO:0034378	chylomicron assembly	2/1705	10/16374	0.27992	0.671851	0.593402	P4HB/APOE	2
GO:0034434	sterol esterification	2/1705	10/16374	0.27992	0.671851	0.593402	LAMTOR1/APOE	2
GO:0035646	endosome to melanosome transport	2/1705	10/16374	0.27992	0.671851	0.593402	AP3D1/CD63	2
GO:0035865	cellular response to potassium ion	2/1705	10/16374	0.27992	0.671851	0.593402	DLG4/SOD1	2
GO:0035878	nail development	2/1705	10/16374	0.27992	0.671851	0.593402	ITGA6/ITGB4	2
GO:0036336	dendritic cell migration	2/1705	10/16374	0.27992	0.671851	0.593402	GAS6/CALR	2
GO:0042538	hyperosmotic salinity response	2/1705	10/16374	0.27992	0.671851	0.593402	MT-CYB/SLC25A23	2
GO:0042670	retinal cone cell differentiation	2/1705	10/16374	0.27992	0.671851	0.593402	TOPORS/HCN1	2
GO:0044550	secondary metabolite biosynthetic process	2/1705	10/16374	0.27992	0.671851	0.593402	RAPGEF2/GIPC1	2
GO:0045577	regulation of B cell differentiation	2/1705	10/16374	0.27992	0.671851	0.593402	ZFP36L1/ZFP36L2	2
GO:0045647	negative regulation of erythrocyte differentiation	2/1705	10/16374	0.27992	0.671851	0.593402	ZFP36L1/KLF13	2
GO:0045792	negative regulation of cell size	2/1705	10/16374	0.27992	0.671851	0.593402	AKT1/RHOA	2
GO:0045953	negative regulation of natural killer cell mediated cytotoxicity	2/1705	10/16374	0.27992	0.671851	0.593402	CRK/HLA-E	2
GO:0046189	phenol-containing compound biosynthetic process	2/1705	10/16374	0.27992	0.671851	0.593402	RAPGEF2/GIPC1	2
GO:0046549	retinal cone cell development	2/1705	10/16374	0.27992	0.671851	0.593402	TOPORS/HCN1	2
GO:0048660	regulation of smooth muscle cell proliferation	2/1705	10/16374	0.27992	0.671851	0.593402	XRCC6/PDE1A	2
GO:0051247	positive regulation of protein metabolic process	2/1705	10/16374	0.27992	0.671851	0.593402	APP/MTPN	2
GO:0060306	regulation of membrane repolarization	2/1705	10/16374	0.27992	0.671851	0.593402	AKAP9/YWHAE	2
GO:0060338	regulation of type I interferon-mediated signaling pathway	2/1705	10/16374	0.27992	0.671851	0.593402	PTPN11/HSP90AB1	2
GO:0060442	branching involved in prostate gland morphogenesis	2/1705	10/16374	0.27992	0.671851	0.593402	FGFR2/FEM1B	2
GO:0060765	regulation of androgen receptor signaling pathway	2/1705	10/16374	0.27992	0.671851	0.593402	DDX5/PARK7	2
GO:0061052	negative regulation of cell growth involved in cardiac muscle cell development	2/1705	10/16374	0.27992	0.671851	0.593402	YY1/PAK1	2
GO:0071450	cellular response to oxygen radical	2/1705	10/16374	0.27992	0.671851	0.593402	SOD1/MT3	2
GO:0071609	chemokine (C-C motif) ligand 5 production	2/1705	10/16374	0.27992	0.671851	0.593402	DDX3X/SIRPA	2
GO:0086010	membrane depolarization during action potential	2/1705	10/16374	0.27992	0.671851	0.593402	YWHAH/ANK3	2
GO:0090309	positive regulation of DNA methylation-dependent heterochromatin assembly	2/1705	10/16374	0.27992	0.671851	0.593402	FAM208A/TRIM28	2
GO:0097048	dendritic cell apoptotic process	2/1705	10/16374	0.27992	0.671851	0.593402	RAPGEF2/GAS6	2
GO:0097237	cellular response to toxic substance	2/1705	10/16374	0.27992	0.671851	0.593402	PINK1/FIS1	2
GO:0097305	response to alcohol	2/1705	10/16374	0.27992	0.671851	0.593402	HDAC2/UNC79	2
GO:0099068	postsynapse assembly	2/1705	10/16374	0.27992	0.671851	0.593402	NLGN2/NRXN2	2
GO:0099566	regulation of postsynaptic cytosolic calcium ion concentration	2/1705	10/16374	0.27992	0.671851	0.593402	SLC8A1/ATP2B2	2
GO:0140052	cellular response to oxidised low-density lipoprotein particle stimulus	2/1705	10/16374	0.27992	0.671851	0.593402	MIA3/AKT1	2
GO:1900165	negative regulation of interleukin-6 secretion	2/1705	10/16374	0.27992	0.671851	0.593402	SYT11/GAS6	2
GO:1901799	negative regulation of proteasomal protein catabolic process	2/1705	10/16374	0.27992	0.671851	0.593402	GABARAPL2/HSP90AB1	2
GO:1901838	positive regulation of transcription of nucleolar large rRNA by RNA polymerase I	2/1705	10/16374	0.27992	0.671851	0.593402	NCL/PIH1D1	2
GO:1902237	positive regulation of endoplasmic reticulum stress-induced intrinsic apoptotic signaling pathway	2/1705	10/16374	0.27992	0.671851	0.593402	DDIT3/SERINC3	2
GO:1902808	positive regulation of cell cycle G1/S phase transition	2/1705	10/16374	0.27992	0.671851	0.593402	DDRGK1/PHB2	2
GO:1903800	positive regulation of production of miRNAs involved in gene silencing by miRNA	2/1705	10/16374	0.27992	0.671851	0.593402	DDX5/MAP2K2	2
GO:1904903	ESCRT III complex disassembly	2/1705	10/16374	0.27992	0.671851	0.593402	CHMP5/CHMP1A	2
GO:2000304	positive regulation of ceramide biosynthetic process	2/1705	10/16374	0.27992	0.671851	0.593402	TNFRSF1A/RACK1	2
GO:0000023	maltose metabolic process	1/1705	3/16374	0.281002	0.671851	0.593402	GAA	1
GO:0000075	cell cycle checkpoint	1/1705	3/16374	0.281002	0.671851	0.593402	SOX11	1
GO:0000103	sulfate assimilation	1/1705	3/16374	0.281002	0.671851	0.593402	PAPSS1	1
GO:0000432	positive regulation of transcription from RNA polymerase II promoter by glucose	1/1705	3/16374	0.281002	0.671851	0.593402	USF2	1
GO:0000958	mitochondrial mRNA catabolic process	1/1705	3/16374	0.281002	0.671851	0.593402	PDE12	1
GO:0001172	transcription, RNA-templated	1/1705	3/16374	0.281002	0.671851	0.593402	POLR2A	1
GO:0001951	intestinal D-glucose absorption	1/1705	3/16374	0.281002	0.671851	0.593402	EZR	1
GO:0002155	regulation of thyroid hormone mediated signaling pathway	1/1705	3/16374	0.281002	0.671851	0.593402	THRA	1
GO:0002191	cap-dependent translational initiation	1/1705	3/16374	0.281002	0.671851	0.593402	EIF4G1	1
GO:0002282	microglial cell activation involved in immune response	1/1705	3/16374	0.281002	0.671851	0.593402	GRN	1
GO:0002424	T cell mediated immune response to tumor cell	1/1705	3/16374	0.281002	0.671851	0.593402	HSPD1	1
GO:0002434	immune complex clearance	1/1705	3/16374	0.281002	0.671851	0.593402	CLU	1
GO:0002476	antigen processing and presentation of endogenous peptide antigen via MHC class Ib	1/1705	3/16374	0.281002	0.671851	0.593402	HLA-E	1
GO:0002519	natural killer cell tolerance induction	1/1705	3/16374	0.281002	0.671851	0.593402	HLA-E	1
GO:0002541	activation of plasma proteins involved in acute inflammatory response	1/1705	3/16374	0.281002	0.671851	0.593402	F3	1
GO:0002637	regulation of immunoglobulin production	1/1705	3/16374	0.281002	0.671851	0.593402	PKN1	1
GO:0002904	positive regulation of B cell apoptotic process	1/1705	3/16374	0.281002	0.671851	0.593402	BAX	1
GO:0003056	regulation of vascular smooth muscle contraction	1/1705	3/16374	0.281002	0.671851	0.593402	ATP2B1	1
GO:0003219	cardiac right ventricle formation	1/1705	3/16374	0.281002	0.671851	0.593402	SMARCD3	1
GO:0003335	corneocyte development	1/1705	3/16374	0.281002	0.671851	0.593402	PSAP	1
GO:0006114	glycerol biosynthetic process	1/1705	3/16374	0.281002	0.671851	0.593402	PGP	1
GO:0006177	GMP biosynthetic process	1/1705	3/16374	0.281002	0.671851	0.593402	IMPDH2	1
GO:0006210	thymine catabolic process	1/1705	3/16374	0.281002	0.671851	0.593402	DPYD	1
GO:0006213	pyrimidine nucleoside metabolic process	1/1705	3/16374	0.281002	0.671851	0.593402	ERH	1
[truncated: 3,193 more rows]

## Sheet: FigS2E-down
The GO analysis of down-regulate genes of aNSC compared with pNSC
[truncated: 4,723 more rows]

[truncated: 2 more sheets: Fig2H, Fig2I]
