# Supplementary material for: Deciphering molecular heterogeneity and dynamics of human hippocampal neural stem cells at different ages and injury states
Source: eLife. 2024 Apr 12;12:RP89507. doi: 10.7554/eLife.89507 (PMC11014727; doi:10.7554/eLife.89507)
Supplement: Figure 3—source data 1. [file elife-89507-fig3-data1.xlsx]

## Sheet: Fig3.Findmarker
Potential marker genes identified by Findallmarker
p_val	avg_log2FC	pct.1	pct.2	p_val_adj	cluster	gene
3.94e-250	2.15246	0.744	0.366	1.3214e-245	Primed NSC	CHI3L1
9.15596e-217	1.3066	0.98	0.837	3.07073e-212	Primed NSC	CAMK2D
2.58613e-209	1.43502	0.75	0.423	8.67337e-205	Primed NSC	SLC4A7
1.22579e-203	0.980634	0.931	0.675	4.11106e-199	Primed NSC	PCCA
6.60372e-182	1.01743	0.556	0.226	2.21476e-177	Primed NSC	BACE2
1.79041e-161	1.22808	0.812	0.535	6.00467e-157	Primed NSC	LDLRAD3
3.18983e-157	1.02097	0.644	0.336	1.06981e-152	Primed NSC	PRTG
3.21238e-153	1.1734	0.942	0.798	1.07737e-148	Primed NSC	NRCAM
1.0019e-150	0.875513	0.698	0.397	3.36019e-146	Primed NSC	GLDC
7.23321e-148	1.11512	0.48	0.192	2.42587e-143	Primed NSC	HSPE1
2.76367e-141	1.19836	0.834	0.599	9.26879e-137	Primed NSC	CHST11
3.75562e-135	1.03496	0.793	0.539	1.25956e-130	Primed NSC	ELL2
7.1703e-134	0.723575	0.742	0.486	2.40477e-129	Primed NSC	PUM3
3.52998e-132	1.77233	0.738	0.467	1.18388e-127	Primed NSC	EGFR
3.77789e-132	1.1391	0.641	0.374	1.26703e-127	Primed NSC	SERPINE2
8.2521e-131	1.17208	0.899	0.77	2.76759e-126	Primed NSC	DPP6
3.61631e-129	0.888471	0.628	0.352	1.21284e-124	Primed NSC	ACVR1
6.92499e-126	0.77045	0.891	0.694	2.3225e-121	Primed NSC	FNDC3B
3.75947e-122	0.754413	0.901	0.73	1.26085e-117	Primed NSC	AGAP1
2.9837e-121	0.905901	0.744	0.49	1.00067e-116	Primed NSC	SH3RF1
8.58775e-118	0.695333	0.793	0.603	2.88016e-113	Primed NSC	MAPKAP1
1.81029e-116	0.76922	0.727	0.492	6.07136e-112	Primed NSC	IARS
3.48359e-114	0.848008	0.818	0.593	1.16833e-109	Primed NSC	CHD7
2.21411e-111	0.545784	0.948	0.803	7.42568e-107	Primed NSC	BIRC6
5.93133e-111	0.757019	0.733	0.492	1.98925e-106	Primed NSC	PTPRE
9.85457e-111	0.827292	0.759	0.531	3.30503e-106	Primed NSC	CMSS1
1.47282e-105	0.453244	0.266	0.074	4.93953e-101	Primed NSC	TUBB6
5.61794e-105	0.558552	0.86	0.65	1.88414e-100	Primed NSC	GPCPD1
5.56608e-104	0.925587	0.629	0.392	1.86675e-99	Primed NSC	GBE1
6.47707e-102	0.844575	0.993	0.849	2.17228e-97	Primed NSC	NEAT1
7.76853e-101	0.878836	0.593	0.348	2.60541e-96	Primed NSC	SIPA1L2
1.62112e-100	0.684935	0.853	0.692	5.43691e-96	Primed NSC	SMG6
5.73865e-98	0.735321	0.75	0.544	1.92463e-93	Primed NSC	SCFD2
9.20046e-98	0.965033	0.639	0.443	3.08565e-93	Primed NSC	MIR29B2CHG
4.46568e-97	0.814582	0.582	0.359	1.4977e-92	Primed NSC	TRAK2
4.28982e-96	0.655752	0.467	0.235	1.43872e-91	Primed NSC	LHFPL2
6.18776e-95	0.682121	0.59	0.356	2.07525e-90	Primed NSC	NSMAF
1.41607e-94	0.663319	0.837	0.632	4.7492e-90	Primed NSC	SUPT3H
2.37294e-94	0.9153	0.871	0.756	7.95837e-90	Primed NSC	EHBP1
8.45472e-94	0.866415	0.395	0.174	2.83554e-89	Primed NSC	MIR4435-2HG
2.29446e-93	0.684966	0.708	0.486	7.69517e-89	Primed NSC	CDYL
2.82232e-92	0.582169	0.782	0.58	9.4655e-88	Primed NSC	SIPA1L3
3.41837e-90	0.623481	0.873	0.707	1.14645e-85	Primed NSC	VTI1A
5.904e-90	0.507653	0.841	0.665	1.98008e-85	Primed NSC	TRIM44
2.34777e-89	0.617027	0.735	0.538	7.87394e-85	Primed NSC	EEA1
6.62306e-89	1.35368	0.654	0.455	2.22124e-84	Primed NSC	MDM2
8.15456e-89	0.590674	0.611	0.384	2.73488e-84	Primed NSC	TIMM23B
9.4886e-88	0.537295	0.796	0.609	3.18229e-83	Primed NSC	THADA
9.49475e-88	0.907417	0.481	0.25	3.18435e-83	Primed NSC	GALNT13
1.47767e-87	0.568503	0.808	0.611	4.95582e-83	Primed NSC	XRRA1
2.06119e-87	0.673556	0.709	0.515	6.91282e-83	Primed NSC	MTHFD1L
5.61865e-87	1.20771	0.661	0.456	1.88438e-82	Primed NSC	DPF3
6.38137e-87	0.433734	0.785	0.597	2.14018e-82	Primed NSC	HECTD1
1.96513e-86	0.63374	0.915	0.712	6.59065e-82	Primed NSC	RAD51B
4.03714e-86	0.785803	0.834	0.621	1.35398e-81	Primed NSC	LHFPL6
9.34092e-86	0.605467	0.868	0.716	3.13276e-81	Primed NSC	MAP4K5
2.3171e-85	0.696864	0.773	0.578	7.77109e-81	Primed NSC	MCC
9.74845e-85	0.540181	0.684	0.469	3.26943e-80	Primed NSC	CBFB
1.97713e-84	0.613067	0.734	0.558	6.6309e-80	Primed NSC	VMP1
1.65138e-83	0.67244	0.424	0.209	5.53838e-79	Primed NSC	MIR222HG
3.54214e-83	0.565497	0.69	0.492	1.18796e-78	Primed NSC	FAM208B
1.73738e-82	0.480779	0.8	0.613	5.82683e-78	Primed NSC	RPTOR
4.07635e-81	0.823903	0.656	0.449	1.36713e-76	Primed NSC	CPNE8
6.04784e-81	0.650267	0.837	0.657	2.02832e-76	Primed NSC	ZNF516
1.29571e-80	0.507315	0.906	0.726	4.34556e-76	Primed NSC	CDKAL1
3.55828e-80	1.05866	0.369	0.17	1.19338e-75	Primed NSC	AC098829.1
1.32713e-78	0.51613	0.52	0.308	4.45093e-74	Primed NSC	PMM2
4.18061e-78	0.690828	0.701	0.473	1.40209e-73	Primed NSC	SLC35F1
5.04783e-78	1.15877	0.779	0.621	1.69294e-73	Primed NSC	RGS6
1.21264e-77	0.514315	0.859	0.684	4.06697e-73	Primed NSC	COG5
1.85339e-77	0.442863	0.79	0.613	6.21589e-73	Primed NSC	DHX36
2.94269e-77	0.46798	0.296	0.114	9.86918e-73	Primed NSC	MYOF
4.07097e-77	0.67657	0.611	0.416	1.36532e-72	Primed NSC	MAP3K20
4.95661e-77	0.459994	0.878	0.709	1.66235e-72	Primed NSC	TTC17
1.13953e-76	0.415512	0.739	0.572	3.82175e-72	Primed NSC	PRKDC
1.31632e-76	0.542479	0.254	0.086	4.41469e-72	Primed NSC	ANKRD33B
1.64829e-76	0.978195	0.822	0.735	5.52804e-72	Primed NSC	NOVA1
4.65234e-76	0.661827	0.814	0.646	1.5603e-71	Primed NSC	UBE2E2
3.7471e-75	0.945035	0.501	0.291	1.2567e-70	Primed NSC	SPSB1
1.41796e-73	0.554885	0.298	0.122	4.75554e-69	Primed NSC	IGSF9B
4.80359e-73	0.578345	0.265	0.096	1.61103e-68	Primed NSC	KCNH1
7.44302e-73	1.14634	0.811	0.673	2.49624e-68	Primed NSC	GPC6
2.61609e-72	0.893038	0.826	0.694	8.77385e-68	Primed NSC	GRIP1
3.9656e-72	0.443723	0.935	0.795	1.32998e-67	Primed NSC	FAM172A
1.30842e-71	0.429332	0.746	0.564	4.38819e-67	Primed NSC	SEC31A
1.76449e-71	0.805574	0.765	0.591	5.91775e-67	Primed NSC	NAMPT
3.14666e-71	0.43962	0.924	0.767	1.05533e-66	Primed NSC	PPP6R3
4.35529e-71	0.391457	0.806	0.65	1.46068e-66	Primed NSC	SMCHD1
1.04053e-70	0.335483	0.676	0.489	3.48973e-66	Primed NSC	LARS
1.68105e-70	0.620674	0.582	0.368	5.63791e-66	Primed NSC	RANBP17
4.22476e-70	0.52209	0.837	0.69	1.4169e-65	Primed NSC	LYST
5.49971e-70	0.51253	0.984	0.861	1.84449e-65	Primed NSC	TRIO
4.91268e-69	0.511181	0.882	0.736	1.64761e-64	Primed NSC	CCNY
5.54253e-69	0.473317	0.462	0.266	1.85885e-64	Primed NSC	BCCIP
7.77382e-69	0.606527	0.662	0.49	2.60718e-64	Primed NSC	TRIM24
1.11863e-68	0.413008	0.906	0.749	3.75165e-64	Primed NSC	VPS13B
1.20049e-68	0.450001	0.938	0.814	4.0262e-64	Primed NSC	XPO1
3.20457e-68	0.689887	0.596	0.392	1.07475e-63	Primed NSC	UST
4.48087e-68	0.412705	0.284	0.116	1.5028e-63	Primed NSC	NUDCD2
1.2847e-67	0.53095	0.651	0.458	4.30862e-63	Primed NSC	RAB31
1.44698e-67	0.693404	0.552	0.362	4.85288e-63	Primed NSC	PVT1
1.78106e-67	0.499839	0.67	0.484	5.97331e-63	Primed NSC	MTR
1.96988e-67	0.561123	0.553	0.358	6.60657e-63	Primed NSC	NDUFAF2
2.33703e-67	0.421324	0.827	0.672	7.83794e-63	Primed NSC	MNAT1
3.42218e-67	0.578135	0.856	0.631	1.14773e-62	Primed NSC	CD44
3.9625e-67	0.718727	0.316	0.141	1.32894e-62	Primed NSC	CDK6
1.12849e-66	0.435262	0.784	0.627	3.78474e-62	Primed NSC	LRPPRC
1.56737e-66	0.500852	0.539	0.347	5.25663e-62	Primed NSC	TRIM4
2.09747e-66	0.441096	0.394	0.205	7.0345e-62	Primed NSC	TMEM38B
3.02475e-66	0.592609	0.274	0.11	1.01444e-61	Primed NSC	ADAM12
3.642e-66	0.557116	0.634	0.469	1.22145e-61	Primed NSC	MAT2A
1.71364e-65	0.495481	0.95	0.817	5.74719e-61	Primed NSC	FMNL2
1.88413e-65	0.389438	0.84	0.687	6.31898e-61	Primed NSC	MON2
3.66742e-65	0.811938	0.442	0.251	1.22998e-60	Primed NSC	CRYAB
5.29704e-65	0.793352	0.703	0.51	1.77652e-60	Primed NSC	GAP43
1.21747e-64	0.431438	0.368	0.184	4.08314e-60	Primed NSC	DOCK6
2.20391e-64	0.607723	0.733	0.57	7.39147e-60	Primed NSC	FAM110B
6.85269e-64	0.651684	0.671	0.524	2.29826e-59	Primed NSC	GALNT2
1.42302e-63	0.559438	0.883	0.721	4.77252e-59	Primed NSC	TEAD1
2.90508e-63	0.472341	0.61	0.43	9.74305e-59	Primed NSC	MBD2
3.15586e-63	0.480053	0.678	0.506	1.05841e-58	Primed NSC	TAF1
1.06368e-62	0.33129	0.356	0.173	3.56739e-58	Primed NSC	SNHG8
1.12378e-62	0.519352	0.479	0.288	3.76893e-58	Primed NSC	PDPN
1.73961e-62	0.399438	0.818	0.651	5.83431e-58	Primed NSC	FAM120B
6.11529e-62	0.611082	0.377	0.195	2.05095e-57	Primed NSC	STK32A
7.97611e-62	0.417905	0.689	0.521	2.67503e-57	Primed NSC	PARG
1.9075e-61	0.404931	0.837	0.696	6.39738e-57	Primed NSC	TAF15
2.2251e-61	0.470587	0.98	0.879	7.46256e-57	Primed NSC	ADGRL3
2.56114e-61	0.415344	0.819	0.679	8.58956e-57	Primed NSC	VPS53
3.5935e-61	0.396995	0.541	0.353	1.20519e-56	Primed NSC	WDR43
5.76605e-61	0.501059	0.873	0.693	1.93382e-56	Primed NSC	NSMCE2
6.23367e-61	0.45604	0.826	0.673	2.09065e-56	Primed NSC	RAB3GAP2
6.32032e-61	0.435329	0.791	0.635	2.11971e-56	Primed NSC	SND1
9.42317e-61	0.412493	0.741	0.573	3.16034e-56	Primed NSC	RNF216
1.13402e-60	0.683713	0.796	0.683	3.80327e-56	Primed NSC	CLIP1
3.41679e-60	0.731194	0.749	0.617	1.14592e-55	Primed NSC	ANKRD10
3.69866e-60	0.453388	0.712	0.553	1.24046e-55	Primed NSC	SLTM
5.03398e-60	0.39474	0.967	0.828	1.6883e-55	Primed NSC	ZFAND3
7.30117e-60	0.428602	0.823	0.631	2.44867e-55	Primed NSC	METTL15
1.54809e-59	0.461512	0.684	0.513	5.19199e-55	Primed NSC	CEP192
9.97042e-59	0.443234	0.481	0.296	3.34388e-54	Primed NSC	TP53
1.66804e-58	0.48118	0.873	0.731	5.59428e-54	Primed NSC	ZCCHC7
2.3715e-58	0.761495	0.913	0.845	7.95352e-54	Primed NSC	AC092691.1
3.62838e-58	0.497576	0.353	0.18	1.21689e-53	Primed NSC	DGKH
4.19717e-58	0.425887	0.78	0.606	1.40765e-53	Primed NSC	AP3B1
8.6819e-58	0.874315	0.361	0.188	2.91173e-53	Primed NSC	PBX3
1.7904e-57	0.376845	0.721	0.569	6.00466e-53	Primed NSC	HNRNPA3
3.30959e-57	0.419752	0.623	0.456	1.10997e-52	Primed NSC	METTL16
3.52913e-57	0.436959	0.603	0.429	1.1836e-52	Primed NSC	NOL10
4.5421e-57	0.417951	0.914	0.725	1.52333e-52	Primed NSC	AKAP13
4.78192e-57	0.371912	0.266	0.113	1.60376e-52	Primed NSC	AC090692.1
6.07238e-57	0.504471	0.85	0.713	2.03655e-52	Primed NSC	SPIDR
6.1237e-57	0.630294	0.351	0.186	2.05377e-52	Primed NSC	RGS17
7.49348e-57	0.295417	0.43	0.246	2.51316e-52	Primed NSC	ABCE1
9.55207e-57	0.369989	0.849	0.725	3.20357e-52	Primed NSC	NUTM2A-AS1
9.99756e-57	0.38371	0.467	0.281	3.35298e-52	Primed NSC	NUP107
1.25356e-56	0.295235	0.69	0.511	4.2042e-52	Primed NSC	NAA15
1.30715e-56	0.639261	0.563	0.388	4.38393e-52	Primed NSC	MYO1E
1.37881e-56	0.344877	0.717	0.561	4.62424e-52	Primed NSC	SFSWAP
2.19576e-56	0.554567	0.682	0.522	7.36413e-52	Primed NSC	BACH1
2.41977e-56	0.350832	0.513	0.338	8.11544e-52	Primed NSC	ITGB1
3.09965e-56	0.368119	0.824	0.677	1.03956e-51	Primed NSC	NBAS
3.57365e-56	0.38564	0.832	0.702	1.19853e-51	Primed NSC	ITFG1
7.5248e-56	0.440496	0.569	0.392	2.52367e-51	Primed NSC	ATR
2.02996e-55	0.376901	0.81	0.684	6.80808e-51	Primed NSC	NRDC
3.1354e-55	0.399203	0.631	0.475	1.05155e-50	Primed NSC	NAA25
3.33328e-55	0.42652	0.655	0.489	1.11791e-50	Primed NSC	CAST
3.93491e-55	0.368294	0.789	0.644	1.31969e-50	Primed NSC	TENT2
5.01444e-55	0.373532	0.779	0.644	1.68174e-50	Primed NSC	RNGTT
6.28771e-55	0.423162	0.584	0.419	2.10877e-50	Primed NSC	THUMPD3-AS1
7.83101e-55	0.4295	0.369	0.202	2.62637e-50	Primed NSC	RPS27L
8.82274e-55	0.357597	0.792	0.651	2.95897e-50	Primed NSC	PIBF1
1.11462e-54	0.49859	0.574	0.392	3.73821e-50	Primed NSC	SULF2
1.28933e-54	0.476618	0.582	0.416	4.32417e-50	Primed NSC	GATAD2A
4.11447e-54	0.41202	0.785	0.636	1.37991e-49	Primed NSC	RAPGEF1
4.67323e-54	0.454679	0.546	0.376	1.56731e-49	Primed NSC	ATG5
6.43049e-54	0.525666	0.857	0.716	2.15666e-49	Primed NSC	MKL1
8.37176e-54	0.523645	0.319	0.156	2.80772e-49	Primed NSC	MEGF11
1.737e-53	0.471241	0.656	0.502	5.82554e-49	Primed NSC	CKMT2-AS1
1.92656e-53	1.05539	0.706	0.584	6.4613e-49	Primed NSC	SLC24A3
2.92686e-53	0.456248	0.622	0.454	9.81611e-49	Primed NSC	WRN
3.33244e-53	0.392115	0.363	0.199	1.11763e-48	Primed NSC	TRIM56
3.64195e-53	0.407178	0.648	0.498	1.22144e-48	Primed NSC	CCDC93
3.92344e-53	0.538785	0.433	0.264	1.31584e-48	Primed NSC	SMIM12
4.10272e-53	0.331702	0.288	0.135	1.37597e-48	Primed NSC	RBBP8
6.24329e-53	0.421188	0.434	0.262	2.09388e-48	Primed NSC	AAGAB
6.66355e-53	0.380595	0.753	0.611	2.23482e-48	Primed NSC	MGA
6.71486e-53	0.472855	0.663	0.512	2.25203e-48	Primed NSC	ZFAND6
1.18267e-52	0.284282	0.273	0.124	3.96646e-48	Primed NSC	PPRC1
1.53656e-52	0.474304	0.317	0.157	5.15332e-48	Primed NSC	MIR34AHG
1.59078e-52	0.308947	0.547	0.356	5.33515e-48	Primed NSC	USPL1
1.94011e-52	0.378307	0.73	0.573	6.50674e-48	Primed NSC	SPART
2.60269e-52	0.483119	0.599	0.422	8.72891e-48	Primed NSC	SPATA5
3.04029e-52	0.379119	0.619	0.456	1.01965e-47	Primed NSC	CHD1
7.91657e-52	0.429031	0.625	0.476	2.65506e-47	Primed NSC	CARS
9.0406e-52	0.388245	0.794	0.659	3.03204e-47	Primed NSC	STAT3
1.00727e-51	0.387799	0.754	0.595	3.37818e-47	Primed NSC	MEF2A
1.07105e-51	0.40597	0.646	0.486	3.59209e-47	Primed NSC	NFX1
1.51208e-51	0.362804	0.3	0.146	5.07122e-47	Primed NSC	FMNL3
1.93915e-51	0.381305	0.456	0.285	6.50353e-47	Primed NSC	DDX31
6.41512e-51	0.349583	0.673	0.523	2.1515e-46	Primed NSC	NEMF
6.90774e-51	0.390084	0.527	0.372	2.31672e-46	Primed NSC	KHDC4
7.11174e-51	0.56419	0.627	0.46	2.38513e-46	Primed NSC	MAN2A1
8.1543e-51	0.267391	0.369	0.2	2.73479e-46	Primed NSC	DDX21
1.86419e-50	0.456252	0.418	0.236	6.25213e-46	Primed NSC	KCNQ1OT1
2.29931e-50	0.731215	0.908	0.754	7.71141e-46	Primed NSC	ZEB1
2.55254e-50	0.326591	0.641	0.483	8.5607e-46	Primed NSC	ZZEF1
2.79074e-50	0.601428	0.842	0.729	9.35957e-46	Primed NSC	IGF1R
3.25045e-50	0.419654	0.714	0.568	1.09014e-45	Primed NSC	CLIP2
3.25471e-50	0.40755	0.948	0.816	1.09157e-45	Primed NSC	TCF12
3.58618e-50	0.735205	0.433	0.263	1.20273e-45	Primed NSC	FAM129A
3.89939e-50	0.6297	0.681	0.544	1.30778e-45	Primed NSC	SERINC5
5.41525e-50	0.382108	0.761	0.63	1.81617e-45	Primed NSC	FRYL
5.67002e-50	0.523772	0.856	0.719	1.90161e-45	Primed NSC	EXT1
6.73802e-50	0.38571	0.471	0.308	2.2598e-45	Primed NSC	GLRX3
7.35371e-50	0.691994	0.479	0.324	2.46629e-45	Primed NSC	HES4
1.11397e-49	0.332261	0.645	0.492	3.73603e-45	Primed NSC	NUP214
1.47669e-49	0.625581	0.77	0.637	4.95253e-45	Primed NSC	SRGAP1
1.56493e-49	0.427253	0.841	0.701	5.24846e-45	Primed NSC	SFXN5
3.00344e-49	0.412016	0.406	0.241	1.00729e-44	Primed NSC	GALNT7
3.35406e-49	0.359455	0.844	0.704	1.12488e-44	Primed NSC	TRPM7
4.42495e-49	0.424027	0.537	0.376	1.48404e-44	Primed NSC	YARS
4.66075e-49	0.351738	0.601	0.445	1.56312e-44	Primed NSC	XPO4
4.99949e-49	0.252286	0.469	0.308	1.67673e-44	Primed NSC	IPO5
7.40817e-49	0.312293	0.327	0.173	2.48455e-44	Primed NSC	SNHG7
8.34193e-49	0.30665	0.695	0.537	2.79772e-44	Primed NSC	PSME4
8.48129e-49	0.345514	0.481	0.322	2.84445e-44	Primed NSC	PNPT1
1.01094e-48	0.268234	0.432	0.268	3.39048e-44	Primed NSC	RER1
1.79775e-48	0.395359	0.961	0.835	6.02929e-44	Primed NSC	TTC28
1.86825e-48	0.253178	0.827	0.696	6.26575e-44	Primed NSC	XRCC5
3.18654e-48	0.444275	0.597	0.445	1.0687e-43	Primed NSC	ME3
4.52412e-48	0.29955	0.399	0.24	1.5173e-43	Primed NSC	ANXA5
4.63247e-48	0.561328	0.453	0.292	1.55364e-43	Primed NSC	WARS
4.83851e-48	0.381623	0.95	0.807	1.62274e-43	Primed NSC	CHD9
5.64965e-48	0.360384	0.823	0.693	1.89478e-43	Primed NSC	SMC5
5.66534e-48	0.472006	0.731	0.581	1.90004e-43	Primed NSC	SH3PXD2B
6.12055e-48	0.323077	0.565	0.404	2.05271e-43	Primed NSC	CAPN2
7.25106e-48	0.491327	0.59	0.442	2.43186e-43	Primed NSC	MAP3K4
8.8904e-48	0.3776	0.692	0.536	2.98166e-43	Primed NSC	COA1
1.08078e-47	0.311735	0.695	0.555	3.62471e-43	Primed NSC	TAF1D
1.08737e-47	0.363611	0.488	0.324	3.64681e-43	Primed NSC	MTMR2
1.0954e-47	0.509584	0.651	0.489	3.67374e-43	Primed NSC	COMMD10
1.11621e-47	0.303085	0.78	0.634	3.74354e-43	Primed NSC	UBE3C
1.35047e-47	0.375717	0.504	0.338	4.52919e-43	Primed NSC	NAA50
1.40613e-47	0.324109	0.648	0.491	4.71589e-43	Primed NSC	ADAM17
1.69324e-47	0.47565	0.943	0.775	5.6788e-43	Primed NSC	NAV2
1.86366e-47	0.354354	0.308	0.158	6.25036e-43	Primed NSC	TNFRSF10B
2.03977e-47	0.262867	0.911	0.787	6.84098e-43	Primed NSC	ANKRD11
2.23493e-47	0.350424	0.41	0.252	7.4955e-43	Primed NSC	CD276
2.44683e-47	0.451736	0.686	0.549	8.20617e-43	Primed NSC	ASCC3
2.4784e-47	0.333931	0.418	0.258	8.31206e-43	Primed NSC	HSF1
5.10501e-47	0.280954	0.757	0.613	1.71212e-42	Primed NSC	TBCA
5.88163e-47	0.570242	0.782	0.667	1.97258e-42	Primed NSC	NLGN4Y
8.15929e-47	0.310418	0.472	0.312	2.73646e-42	Primed NSC	NSUN2
8.38021e-47	0.383524	0.744	0.622	2.81056e-42	Primed NSC	JPX
8.67437e-47	0.360391	0.659	0.501	2.90921e-42	Primed NSC	NSRP1
9.38337e-47	0.324627	0.919	0.786	3.14699e-42	Primed NSC	FAF1
1.10242e-46	0.349274	0.799	0.664	3.69728e-42	Primed NSC	WDR70
1.33685e-46	0.739254	0.337	0.18	4.48353e-42	Primed NSC	ARHGAP24
2.44753e-46	0.43063	0.61	0.459	8.20852e-42	Primed NSC	ORC3
5.97852e-46	0.330844	0.569	0.419	2.00508e-41	Primed NSC	IWS1
6.11959e-46	0.432914	0.93	0.744	2.05239e-41	Primed NSC	LPP
6.46643e-46	0.279826	0.828	0.703	2.16871e-41	Primed NSC	GPBP1
6.89491e-46	0.342316	0.615	0.466	2.31242e-41	Primed NSC	HSPA9
1.06001e-45	0.364123	0.321	0.172	3.55506e-41	Primed NSC	TYW3
1.24853e-45	0.326406	0.682	0.537	4.18733e-41	Primed NSC	THOC2
1.86054e-45	0.32352	0.725	0.594	6.2399e-41	Primed NSC	FNBP4
2.13744e-45	0.42227	0.44	0.282	7.16855e-41	Primed NSC	MED6
2.97773e-45	0.35495	0.663	0.526	9.98672e-41	Primed NSC	ERCC6L2
3.76849e-45	0.322037	0.569	0.408	1.26388e-40	Primed NSC	DNAJC7
4.73943e-45	0.510063	0.701	0.581	1.58951e-40	Primed NSC	SPRED1
6.29458e-45	0.365447	0.54	0.391	2.11108e-40	Primed NSC	TRAPPC11
6.8767e-45	0.454241	0.516	0.363	2.30631e-40	Primed NSC	LYRM4
9.37643e-45	0.27782	0.649	0.485	3.14467e-40	Primed NSC	MDN1
1.51663e-44	0.321227	0.4	0.244	5.08648e-40	Primed NSC	TGS1
2.54573e-44	0.729407	0.565	0.439	8.53788e-40	Primed NSC	PKNOX2
2.7902e-44	0.313997	0.579	0.432	9.35776e-40	Primed NSC	TMEM181
4.23837e-44	0.334784	0.562	0.413	1.42146e-39	Primed NSC	ANAPC1
7.51149e-44	0.531289	0.488	0.337	2.5192e-39	Primed NSC	HSPA4L
9.57185e-44	0.298483	0.466	0.306	3.21021e-39	Primed NSC	HEATR1
1.01066e-43	0.347238	0.866	0.735	3.38955e-39	Primed NSC	HERC4
1.1488e-43	0.367464	0.822	0.689	3.85285e-39	Primed NSC	TLK1
1.32271e-43	0.328536	0.675	0.535	4.43611e-39	Primed NSC	UBAP1
1.44874e-43	0.322328	0.704	0.583	4.8588e-39	Primed NSC	CTTN
1.61709e-43	0.312345	0.737	0.599	5.42339e-39	Primed NSC	ITCH
1.88723e-43	0.292446	0.49	0.328	6.32941e-39	Primed NSC	DDX18
2.19909e-43	0.32409	0.676	0.539	7.37531e-39	Primed NSC	EP400
2.51249e-43	0.263326	0.5	0.334	8.42638e-39	Primed NSC	EIF3B
2.68312e-43	0.340635	0.556	0.413	8.99865e-39	Primed NSC	NPLOC4
2.69643e-43	0.319206	0.565	0.412	9.0433e-39	Primed NSC	FAF2
3.36229e-43	0.613698	0.377	0.228	1.12764e-38	Primed NSC	DOCK10
5.86851e-43	0.3697	0.652	0.524	1.96818e-38	Primed NSC	TYW1
6.33068e-43	0.274097	0.577	0.414	2.12318e-38	Primed NSC	XRN2
6.35048e-43	0.348889	0.467	0.314	2.12982e-38	Primed NSC	HNRNPL
1.05659e-42	0.482281	0.746	0.604	3.54358e-38	Primed NSC	SUMF1
1.06067e-42	0.395844	0.582	0.446	3.55728e-38	Primed NSC	SRP54
1.61793e-42	0.406192	0.569	0.418	5.42622e-38	Primed NSC	NFATC3
2.07005e-42	0.393205	0.6	0.455	6.94254e-38	Primed NSC	CREM
2.39099e-42	0.298306	0.66	0.512	8.0189e-38	Primed NSC	TMEM87A
2.45974e-42	0.321146	0.796	0.659	8.24946e-38	Primed NSC	CHCHD3
2.62189e-42	0.283697	0.971	0.865	8.79328e-38	Primed NSC	JMJD1C
2.71089e-42	0.339981	0.415	0.265	9.0918e-38	Primed NSC	PTRH2
2.83844e-42	0.312153	0.798	0.671	9.51954e-38	Primed NSC	EHMT1
2.88146e-42	0.416529	0.461	0.31	9.66383e-38	Primed NSC	WNK3
2.9116e-42	0.441951	0.26	0.127	9.76492e-38	Primed NSC	ARHGAP10
3.14724e-42	0.326042	0.407	0.26	1.05552e-37	Primed NSC	CBWD5
4.1306e-42	0.288122	0.259	0.128	1.38532e-37	Primed NSC	PIEZO1
6.28883e-42	0.338426	0.448	0.306	2.10915e-37	Primed NSC	USP16
6.90672e-42	0.334218	0.673	0.542	2.31638e-37	Primed NSC	ABL2
8.2484e-42	0.284065	0.825	0.69	2.76635e-37	Primed NSC	ACBD6
9.28311e-42	0.458641	0.524	0.372	3.11337e-37	Primed NSC	JAM3
1.29177e-41	0.447927	0.638	0.492	4.33234e-37	Primed NSC	RHBDD1
1.84883e-41	0.325531	0.582	0.437	6.20059e-37	Primed NSC	UQCC1
2.08039e-41	0.390195	0.847	0.709	6.97722e-37	Primed NSC	GAB2
2.12713e-41	0.363791	0.611	0.481	7.13397e-37	Primed NSC	ZNF586
2.56208e-41	0.337604	0.288	0.155	8.59271e-37	Primed NSC	STRADB
3.37451e-41	0.370585	0.686	0.548	1.13174e-36	Primed NSC	LYPLAL1
4.22981e-41	0.457014	0.471	0.328	1.41859e-36	Primed NSC	MEST
5.03665e-41	0.333861	0.81	0.694	1.68919e-36	Primed NSC	FNDC3A
6.66618e-41	0.318661	0.641	0.498	2.2357e-36	Primed NSC	DPY19L3
6.98624e-41	0.381186	0.462	0.314	2.34305e-36	Primed NSC	NRIP1
7.47026e-41	0.297034	0.843	0.715	2.50538e-36	Primed NSC	GOLGA4
7.52222e-41	0.383744	0.41	0.268	2.5228e-36	Primed NSC	PNRC1
9.29142e-41	0.350886	0.79	0.659	3.11616e-36	Primed NSC	CUX1
1.13177e-40	0.361901	0.359	0.214	3.79573e-36	Primed NSC	HPRT1
1.17601e-40	0.369278	0.602	0.47	3.94412e-36	Primed NSC	SLC25A37
1.22445e-40	0.284689	0.678	0.54	4.10657e-36	Primed NSC	PSMD1
1.90833e-40	0.657777	0.386	0.25	6.40015e-36	Primed NSC	PRR5L
1.97934e-40	0.28013	0.825	0.707	6.63831e-36	Primed NSC	PTBP2
2.0447e-40	0.303476	0.659	0.532	6.85751e-36	Primed NSC	PRKRIP1
2.06085e-40	0.30075	0.416	0.261	6.91169e-36	Primed NSC	ZNHIT6
2.52381e-40	0.599482	0.692	0.547	8.46434e-36	Primed NSC	ABCA1
3.37652e-40	0.306192	0.524	0.373	1.13242e-35	Primed NSC	EML4
3.67604e-40	0.48071	0.326	0.192	1.23287e-35	Primed NSC	TRIM52
6.02545e-40	0.337695	0.664	0.521	2.02082e-35	Primed NSC	LARP4
8.4072e-40	0.319852	0.518	0.373	2.81961e-35	Primed NSC	SPTLC1
8.47162e-40	0.284218	0.324	0.184	2.84121e-35	Primed NSC	FILIP1L
8.76003e-40	0.297726	0.468	0.321	2.93794e-35	Primed NSC	SMAD5
1.04898e-39	0.400725	0.446	0.304	3.51807e-35	Primed NSC	BEND7
1.09367e-39	0.470842	0.525	0.382	3.66796e-35	Primed NSC	OSMR-AS1
1.1634e-39	0.261054	0.712	0.583	3.9018e-35	Primed NSC	SCAF11
1.21092e-39	0.287937	0.41	0.274	4.06119e-35	Primed NSC	MED28
1.46298e-39	0.277525	0.489	0.351	4.90654e-35	Primed NSC	EPRS
1.59233e-39	0.273253	0.451	0.31	5.34037e-35	Primed NSC	POLR1A
2.39108e-39	0.361637	0.61	0.468	8.0192e-35	Primed NSC	EXOC6
2.40488e-39	0.509864	0.657	0.527	8.06548e-35	Primed NSC	SPRED2
3.31529e-39	0.787761	0.43	0.287	1.11188e-34	Primed NSC	PKN2-AS1
3.4875e-39	0.41967	0.429	0.279	1.16964e-34	Primed NSC	UBASH3B
4.06062e-39	0.350948	0.359	0.221	1.36185e-34	Primed NSC	FASTKD2
4.17487e-39	0.363915	0.407	0.257	1.40017e-34	Primed NSC	GALNT10
4.32636e-39	0.279067	0.622	0.475	1.45097e-34	Primed NSC	ZFC3H1
4.38908e-39	0.435296	0.527	0.371	1.47201e-34	Primed NSC	PCLO
4.44876e-39	0.308692	0.29	0.155	1.49202e-34	Primed NSC	ETV5
4.67721e-39	0.442493	0.394	0.256	1.56864e-34	Primed NSC	LINC00513
5.00456e-39	0.317889	0.432	0.295	1.67843e-34	Primed NSC	TIMM44
6.24455e-39	0.355643	0.488	0.352	2.0943e-34	Primed NSC	TSEN2
7.08662e-39	0.268828	0.756	0.629	2.37671e-34	Primed NSC	TTC37
7.63302e-39	0.302084	0.595	0.452	2.55996e-34	Primed NSC	TMEM165
9.17716e-39	0.411039	0.773	0.666	3.07783e-34	Primed NSC	ATP2C1
9.70206e-39	0.306653	0.741	0.621	3.25388e-34	Primed NSC	SNX13
9.72221e-39	0.306399	0.385	0.243	3.26063e-34	Primed NSC	XPO5
9.74246e-39	0.359224	0.279	0.152	3.26743e-34	Primed NSC	AL162411.1
1.00896e-38	0.30313	0.58	0.437	3.38386e-34	Primed NSC	WWP1
1.12111e-38	0.540589	0.608	0.484	3.75998e-34	Primed NSC	CEP83
1.13088e-38	0.390021	0.537	0.394	3.79274e-34	Primed NSC	POLA1
1.17887e-38	0.438464	0.529	0.396	3.95369e-34	Primed NSC	LAMC1
1.83651e-38	0.361491	0.822	0.684	6.15929e-34	Primed NSC	FARS2
1.9591e-38	0.341168	0.688	0.545	6.57043e-34	Primed NSC	KIF13A
2.0828e-38	0.319351	0.598	0.477	6.98531e-34	Primed NSC	MAP3K7
2.78365e-38	0.251178	0.556	0.416	9.33581e-34	Primed NSC	KPNA1
3.53839e-38	0.296179	0.733	0.605	1.18671e-33	Primed NSC	SCFD1
3.54456e-38	0.275522	0.497	0.346	1.18878e-33	Primed NSC	USP36
3.9485e-38	0.274804	0.469	0.322	1.32425e-33	Primed NSC	ACBD3
4.74502e-38	0.291149	0.699	0.565	1.59139e-33	Primed NSC	WASHC4
4.91145e-38	0.360963	0.758	0.629	1.6472e-33	Primed NSC	NEK6
5.11148e-38	0.338073	0.505	0.366	1.71429e-33	Primed NSC	TRAPPC10
5.29199e-38	0.255563	0.494	0.348	1.77483e-33	Primed NSC	G3BP1
5.71985e-38	0.271988	0.853	0.728	1.91832e-33	Primed NSC	FOXJ3
5.83682e-38	0.396676	0.442	0.3	1.95755e-33	Primed NSC	SP110
6.08653e-38	0.302207	0.716	0.596	2.0413e-33	Primed NSC	2022-03-07
7.15553e-38	0.364012	0.957	0.735	2.39982e-33	Primed NSC	PARD3
7.35535e-38	0.418409	0.395	0.252	2.46684e-33	Primed NSC	ANXA2
8.16437e-38	0.321345	0.619	0.504	2.73817e-33	Primed NSC	ATF6
9.42988e-38	0.435747	0.728	0.621	3.16259e-33	Primed NSC	ZNF462
1.06179e-37	0.309028	0.562	0.435	3.56102e-33	Primed NSC	EIF2S3
1.06315e-37	0.315808	0.419	0.276	3.56559e-33	Primed NSC	SEC23IP
1.1861e-37	0.333421	0.479	0.344	3.97793e-33	Primed NSC	AARS
1.24697e-37	0.253537	0.27	0.147	4.18208e-33	Primed NSC	MUS81
1.35057e-37	0.359783	0.67	0.531	4.52953e-33	Primed NSC	ZFHX3
1.50973e-37	0.300113	0.793	0.671	5.06333e-33	Primed NSC	ACACA
1.55348e-37	0.337204	0.41	0.272	5.21007e-33	Primed NSC	BAZ1A
1.64456e-37	0.291703	0.645	0.517	5.51552e-33	Primed NSC	ECPAS
1.75551e-37	0.446232	0.579	0.443	5.88763e-33	Primed NSC	SLC20A2
2.0433e-37	0.368355	0.512	0.376	6.85282e-33	Primed NSC	URB1
2.16212e-37	0.317786	0.464	0.331	7.25131e-33	Primed NSC	UBE3B
3.76671e-37	0.348793	0.886	0.752	1.26328e-32	Primed NSC	ADK
4.10273e-37	0.253472	0.48	0.339	1.37597e-32	Primed NSC	CCT4
5.19348e-37	0.342844	0.497	0.361	1.74179e-32	Primed NSC	EIF2B3
5.64551e-37	0.332165	0.618	0.484	1.89339e-32	Primed NSC	MED27
6.82479e-37	0.283091	0.471	0.331	2.2889e-32	Primed NSC	FARSB
6.90544e-37	0.303264	0.614	0.47	2.31595e-32	Primed NSC	SENP5
8.15909e-37	0.324284	0.593	0.46	2.73639e-32	Primed NSC	SLC38A6
8.91097e-37	1.0127	0.622	0.513	2.98856e-32	Primed NSC	GRIK2
1.54237e-36	0.326129	0.589	0.461	5.1728e-32	Primed NSC	THOC1
1.83891e-36	0.320895	0.616	0.494	6.16732e-32	Primed NSC	KIAA0556
1.85578e-36	0.30769	0.553	0.41	6.22392e-32	Primed NSC	ELP3
1.86026e-36	0.290478	0.611	0.482	6.23894e-32	Primed NSC	TNPO3
1.90801e-36	0.462517	0.478	0.342	6.39908e-32	Primed NSC	RAI14
3.10891e-36	0.7441	0.395	0.256	1.04267e-31	Primed NSC	ADAMTS9
3.25292e-36	0.25578	0.729	0.605	1.09097e-31	Primed NSC	NAP1L4
3.88111e-36	0.269137	0.75	0.627	1.30165e-31	Primed NSC	HTT
7.43251e-36	0.388833	0.593	0.45	2.49272e-31	Primed NSC	RNF150
7.45885e-36	0.277497	0.728	0.607	2.50155e-31	Primed NSC	ZNF207
8.52248e-36	0.332589	0.495	0.358	2.85827e-31	Primed NSC	PLEKHM1
1.11241e-35	0.375774	0.724	0.608	3.7308e-31	Primed NSC	UGGT2
1.16868e-35	0.263763	0.364	0.22	3.91953e-31	Primed NSC	ARHGEF2
1.28435e-35	0.296467	0.473	0.339	4.30745e-31	Primed NSC	TBK1
1.30712e-35	0.262242	0.513	0.382	4.38382e-31	Primed NSC	SUPT20H
1.64754e-35	0.262208	0.829	0.719	5.52553e-31	Primed NSC	SENP6
1.66537e-35	0.342928	0.654	0.536	5.58532e-31	Primed NSC	DLG5
2.12941e-35	0.281252	0.593	0.454	7.1416e-31	Primed NSC	CEP290
2.2348e-35	0.25517	0.575	0.446	7.49508e-31	Primed NSC	PTCD3
2.44121e-35	0.456254	0.717	0.604	8.18733e-31	Primed NSC	ROCK2
2.73062e-35	0.276878	0.601	0.474	9.15796e-31	Primed NSC	FUBP3
3.29194e-35	0.334481	0.415	0.276	1.10405e-30	Primed NSC	RCL1
3.75085e-35	0.318265	0.731	0.596	1.25796e-30	Primed NSC	FOCAD
6.23765e-35	0.344047	0.459	0.321	2.09198e-30	Primed NSC	WDR25
6.24007e-35	0.353213	0.576	0.448	2.09279e-30	Primed NSC	PSMD14
6.32146e-35	0.47404	0.377	0.25	2.12009e-30	Primed NSC	FDFT1
7.11486e-35	0.358472	0.997	0.905	2.38618e-30	Primed NSC	NPAS3
8.15105e-35	0.311638	0.467	0.344	2.7337e-30	Primed NSC	DHX34
8.78815e-35	0.311067	0.402	0.272	2.94737e-30	Primed NSC	ARFGAP3
9.51883e-35	0.382108	0.554	0.426	3.19243e-30	Primed NSC	DIXDC1
1.09148e-34	0.586914	0.746	0.666	3.66061e-30	Primed NSC	SCD5
1.53871e-34	0.375095	0.822	0.737	5.16054e-30	Primed NSC	SQSTM1
1.68516e-34	0.266014	0.405	0.27	5.65168e-30	Primed NSC	RBM19
1.77077e-34	0.259316	0.399	0.262	5.93882e-30	Primed NSC	UTP20
1.80897e-34	0.321733	0.448	0.308	6.06694e-30	Primed NSC	CHORDC1
2.07659e-34	0.317379	0.58	0.447	6.96447e-30	Primed NSC	NLK
2.33023e-34	0.63755	0.535	0.384	7.81513e-30	Primed NSC	HS6ST3
3.33327e-34	0.320666	0.509	0.375	1.11791e-29	Primed NSC	NSL1
3.68243e-34	0.408108	0.452	0.309	1.23501e-29	Primed NSC	NRP2
4.62646e-34	0.252261	0.769	0.645	1.55162e-29	Primed NSC	RPS6KC1
6.58965e-34	0.294287	0.691	0.585	2.21004e-29	Primed NSC	PIP5K1A
7.17733e-34	0.320099	0.497	0.37	2.40713e-29	Primed NSC	PPWD1
7.26122e-34	0.311842	0.654	0.524	2.43527e-29	Primed NSC	WTAP
8.30804e-34	0.339024	0.411	0.282	2.78635e-29	Primed NSC	C19orf25
8.69611e-34	0.321618	0.571	0.443	2.9165e-29	Primed NSC	UBXN2A
8.70374e-34	0.269021	0.496	0.369	2.91906e-29	Primed NSC	GFM1
9.01932e-34	0.266448	0.563	0.43	3.0249e-29	Primed NSC	TPR
9.12973e-34	0.346153	0.523	0.395	3.06193e-29	Primed NSC	UHRF2
9.29107e-34	0.314744	0.322	0.198	3.11604e-29	Primed NSC	AC010618.3
9.9749e-34	0.349623	0.586	0.442	3.34538e-29	Primed NSC	IFI16
1.15461e-33	0.3857	0.361	0.235	3.87233e-29	Primed NSC	AC084337.2
1.16636e-33	0.258099	0.515	0.393	3.91174e-29	Primed NSC	DNAJC10
1.20445e-33	0.2625	0.766	0.648	4.03949e-29	Primed NSC	LRCH3
1.31969e-33	0.329267	0.5	0.379	4.42597e-29	Primed NSC	RBM28
1.32406e-33	0.261341	0.688	0.57	4.44065e-29	Primed NSC	MTREX
1.40184e-33	0.346304	0.727	0.592	4.70147e-29	Primed NSC	STX8
1.41571e-33	0.277574	0.472	0.344	4.74802e-29	Primed NSC	TRMT13
1.96169e-33	0.33854	0.839	0.695	6.57912e-29	Primed NSC	BABAM2
2.72656e-33	0.322068	0.365	0.236	9.14435e-29	Primed NSC	BIN3
2.85224e-33	0.28816	0.781	0.686	9.56583e-29	Primed NSC	TULP4
3.22672e-33	0.275506	0.561	0.435	1.08218e-28	Primed NSC	PMS1
3.83473e-33	0.260259	0.733	0.633	1.28609e-28	Primed NSC	UBE3A
4.11228e-33	0.295758	0.607	0.485	1.37918e-28	Primed NSC	URI1
4.12049e-33	0.361031	0.465	0.326	1.38193e-28	Primed NSC	CHSY1
4.4273e-33	0.285525	0.431	0.299	1.48483e-28	Primed NSC	RAD54L2
4.6609e-33	0.391315	0.432	0.298	1.56317e-28	Primed NSC	PTPN14
4.73138e-33	0.417277	0.672	0.552	1.58681e-28	Primed NSC	ANTXR1
4.83345e-33	0.345906	0.628	0.502	1.62104e-28	Primed NSC	RSRC1
5.55368e-33	0.338771	0.899	0.771	1.86259e-28	Primed NSC	CDK14
5.65124e-33	0.332987	0.437	0.307	1.89531e-28	Primed NSC	MCL1
8.98495e-33	0.310202	0.329	0.205	3.01337e-28	Primed NSC	APOL2
9.72089e-33	0.31818	0.633	0.521	3.26019e-28	Primed NSC	EXOC1
1.0238e-32	0.34896	0.683	0.567	3.43362e-28	Primed NSC	ELF2
1.24598e-32	0.38682	0.397	0.258	4.17876e-28	Primed NSC	AC114763.1
1.63551e-32	0.308304	0.456	0.322	5.48516e-28	Primed NSC	EFL1
1.6827e-32	0.262084	0.349	0.225	5.64345e-28	Primed NSC	RBM3
1.87633e-32	0.327085	0.635	0.525	6.29285e-28	Primed NSC	ZNF44
2.01807e-32	0.264485	0.544	0.415	6.76819e-28	Primed NSC	QSER1
2.15063e-32	0.301322	0.689	0.569	7.21278e-28	Primed NSC	DIS3L2
2.3699e-32	0.254011	0.548	0.418	7.94818e-28	Primed NSC	RNMT
2.59135e-32	0.668514	0.882	0.807	8.69086e-28	Primed NSC	CADPS
2.59164e-32	0.326865	0.501	0.381	8.69184e-28	Primed NSC	XPNPEP3
2.65812e-32	0.362872	0.539	0.413	8.91479e-28	Primed NSC	DDX10
3.51567e-32	0.305836	0.254	0.14	1.17908e-27	Primed NSC	GCLM
3.6758e-32	0.320027	0.785	0.677	1.23279e-27	Primed NSC	HSD17B12
3.69538e-32	0.282612	0.863	0.758	1.23936e-27	Primed NSC	CDC42BPA
4.061e-32	0.250334	0.61	0.492	1.36198e-27	Primed NSC	RARS2
4.57227e-32	0.287991	0.659	0.552	1.53345e-27	Primed NSC	GPATCH2L
4.932e-32	0.394884	0.563	0.441	1.65409e-27	Primed NSC	AC116366.3
5.33202e-32	0.294853	0.863	0.679	1.78825e-27	Primed NSC	STK3
5.46279e-32	0.425417	0.996	0.918	1.83211e-27	Primed NSC	LRP1B
6.82668e-32	0.251287	0.548	0.428	2.28953e-27	Primed NSC	LTN1
7.34274e-32	0.255788	0.438	0.317	2.46261e-27	Primed NSC	LONP1
8.13006e-32	0.290672	0.548	0.424	2.72666e-27	Primed NSC	SSBP1
8.48615e-32	0.312254	0.575	0.459	2.84608e-27	Primed NSC	ARIH2
8.61957e-32	0.267591	0.792	0.69	2.89083e-27	Primed NSC	CDK13
9.21324e-32	0.412102	0.683	0.57	3.08994e-27	Primed NSC	UMAD1
9.47214e-32	0.37201	0.6	0.469	3.17677e-27	Primed NSC	LIMS1
1.1353e-31	0.318408	0.515	0.396	3.80757e-27	Primed NSC	GTF2F2
1.13651e-31	0.296674	0.497	0.371	3.81163e-27	Primed NSC	TFB1M
1.18035e-31	0.303824	0.687	0.573	3.95865e-27	Primed NSC	ABL1
1.29821e-31	0.272674	0.721	0.608	4.35395e-27	Primed NSC	CAPZB
1.30957e-31	0.42534	0.402	0.255	4.39203e-27	Primed NSC	VAV3
1.45017e-31	0.327669	0.673	0.563	4.86357e-27	Primed NSC	AGPAT5
1.49421e-31	0.282208	0.491	0.365	5.0113e-27	Primed NSC	PRPF3
1.49821e-31	0.310412	0.501	0.38	5.02469e-27	Primed NSC	DAP3
1.57829e-31	0.341481	0.498	0.379	5.29327e-27	Primed NSC	PARN
1.58018e-31	0.290206	0.814	0.682	5.29959e-27	Primed NSC	PEAK1
2.64659e-31	0.287954	0.527	0.408	8.87612e-27	Primed NSC	TPP2
3.35844e-31	0.296595	0.488	0.36	1.12635e-26	Primed NSC	GARS
3.41802e-31	0.342186	0.504	0.382	1.14634e-26	Primed NSC	ZNF274
4.25058e-31	0.255034	0.287	0.167	1.42556e-26	Primed NSC	RNF7
5.56795e-31	0.460034	0.349	0.228	1.86738e-26	Primed NSC	ILDR2
6.0983e-31	0.269348	0.356	0.228	2.04525e-26	Primed NSC	TIMM23
6.54979e-31	0.305275	0.662	0.541	2.19667e-26	Primed NSC	FAM222B
7.27405e-31	0.304708	0.322	0.205	2.43957e-26	Primed NSC	OTULIN
8.86511e-31	0.275847	0.712	0.596	2.97318e-26	Primed NSC	CHD2
9.20733e-31	0.275937	0.66	0.553	3.08795e-26	Primed NSC	SPG11
1.21849e-30	0.274498	0.417	0.291	4.08656e-26	Primed NSC	RARS
1.6739e-30	0.280821	0.313	0.195	5.61394e-26	Primed NSC	EIF2B1
1.93204e-30	0.289474	0.972	0.871	6.47969e-26	Primed NSC	FTX
2.10616e-30	0.363807	0.584	0.46	7.06364e-26	Primed NSC	STX18
2.12651e-30	0.250931	0.403	0.271	7.13188e-26	Primed NSC	LRCH1
2.33758e-30	0.479003	0.606	0.515	7.83977e-26	Primed NSC	ACTN2
2.52685e-30	0.32977	0.703	0.583	8.47454e-26	Primed NSC	COMMD1
2.84815e-30	0.319903	0.497	0.377	9.55211e-26	Primed NSC	PRKAA2
5.05397e-30	0.636366	0.624	0.504	1.695e-25	Primed NSC	WWTR1
5.18862e-30	0.268698	0.649	0.527	1.74016e-25	Primed NSC	TDRD3
6.48831e-30	0.297049	0.468	0.347	2.17605e-25	Primed NSC	TBC1D22B
6.49156e-30	0.315268	0.435	0.312	2.17714e-25	Primed NSC	LDLR
7.07067e-30	0.303795	0.359	0.239	2.37136e-25	Primed NSC	ANKS6
8.70005e-30	0.250573	0.569	0.45	2.91782e-25	Primed NSC	WAPL
1.25771e-29	0.314789	0.461	0.332	4.21812e-25	Primed NSC	RPS6KA3
1.67578e-29	0.645759	0.476	0.359	5.62023e-25	Primed NSC	AL357153.2
1.93189e-29	0.311027	0.744	0.64	6.47918e-25	Primed NSC	APBA2
1.93775e-29	0.290103	0.479	0.368	6.49883e-25	Primed NSC	MRPS31
2.32021e-29	0.266117	0.32	0.203	7.78151e-25	Primed NSC	TRMU
2.36895e-29	0.275638	0.76	0.622	7.94497e-25	Primed NSC	ZNRF3
2.45924e-29	0.258191	0.415	0.295	8.24779e-25	Primed NSC	ANXA7
2.57303e-29	0.256955	0.505	0.383	8.62942e-25	Primed NSC	PPME1
2.72965e-29	0.390465	0.329	0.219	9.1547e-25	Primed NSC	DNMBP
3.33194e-29	0.272137	0.589	0.484	1.11746e-24	Primed NSC	UQCRC2
4.78145e-29	0.255244	0.396	0.278	1.6036e-24	Primed NSC	MARS
5.53007e-29	0.303553	0.396	0.27	1.85467e-24	Primed NSC	PRMT3
7.81242e-29	0.280066	0.531	0.408	2.62013e-24	Primed NSC	TTC27
8.15178e-29	0.268465	0.339	0.225	2.73394e-24	Primed NSC	NT5C
1.00768e-28	0.289109	0.598	0.494	3.37956e-24	Primed NSC	USP40
1.01281e-28	0.337429	0.297	0.18	3.39676e-24	Primed NSC	PRSS23
1.24732e-28	0.261669	0.907	0.796	4.18326e-24	Primed NSC	EIF4G3
1.75972e-28	0.312682	0.564	0.446	5.90174e-24	Primed NSC	CDK8
1.94284e-28	0.302912	0.622	0.512	6.51591e-24	Primed NSC	ZNF254
2.56016e-28	0.274622	0.63	0.534	8.58626e-24	Primed NSC	AGO2
2.65249e-28	0.293805	0.461	0.346	8.89591e-24	Primed NSC	ECHDC1
3.27009e-28	0.415046	0.546	0.428	1.09672e-23	Primed NSC	MGMT
3.64969e-28	0.293709	0.967	0.833	1.22403e-23	Primed NSC	GPHN
3.93485e-28	0.262586	0.918	0.781	1.31967e-23	Primed NSC	MKLN1
5.31323e-28	0.32163	0.387	0.275	1.78195e-23	Primed NSC	AC025283.3
6.11612e-28	0.259164	0.755	0.644	2.05123e-23	Primed NSC	TBC1D22A
6.27648e-28	0.428343	0.624	0.525	2.10501e-23	Primed NSC	MMP16
8.01136e-28	0.506641	0.312	0.196	2.68685e-23	Primed NSC	MYO3A
9.41125e-28	0.283925	0.353	0.238	3.15635e-23	Primed NSC	NOL8
2.60091e-27	0.282219	0.444	0.325	8.72292e-23	Primed NSC	GJC1
2.91819e-27	0.335895	0.54	0.419	9.78703e-23	Primed NSC	ATP11A
3.41822e-27	0.319267	0.571	0.465	1.1464e-22	Primed NSC	ZRANB3
4.24549e-27	0.347946	0.48	0.373	1.42385e-22	Primed NSC	PAWR
4.4502e-27	0.310446	0.271	0.163	1.49251e-22	Primed NSC	ANXA1
4.72702e-27	0.408914	0.567	0.465	1.58535e-22	Primed NSC	TXNRD1
5.12987e-27	0.324974	0.594	0.49	1.72045e-22	Primed NSC	ANO10
5.21637e-27	0.277574	0.629	0.517	1.74947e-22	Primed NSC	STAT5B
5.74649e-27	0.268866	0.325	0.212	1.92726e-22	Primed NSC	FEM1C
6.11385e-27	0.308669	0.371	0.256	2.05046e-22	Primed NSC	RTF2
7.58719e-27	0.378182	0.361	0.244	2.54459e-22	Primed NSC	IRAK2
8.19821e-27	0.292688	0.37	0.256	2.74952e-22	Primed NSC	TCTN3
8.54349e-27	0.276652	0.542	0.427	2.86532e-22	Primed NSC	CDKL3
8.58908e-27	0.314641	0.732	0.613	2.8806e-22	Primed NSC	CCDC91
8.59451e-27	0.33585	0.424	0.306	2.88243e-22	Primed NSC	ERI1
8.63829e-27	0.25497	0.606	0.507	2.89711e-22	Primed NSC	CUL4A
9.36624e-27	0.310686	0.42	0.308	3.14125e-22	Primed NSC	SLC7A1
1.07656e-26	0.346799	0.529	0.422	3.61058e-22	Primed NSC	PPP1CB
1.0926e-26	0.296037	0.831	0.712	3.66435e-22	Primed NSC	TRAF3IP2-AS1
1.10318e-26	0.375631	0.752	0.663	3.69984e-22	Primed NSC	OSBPL9
1.36023e-26	0.354469	0.591	0.486	4.56195e-22	Primed NSC	ZNF827
1.37541e-26	0.367282	0.672	0.575	4.61285e-22	Primed NSC	SREBF2
1.38453e-26	0.257965	0.451	0.332	4.64343e-22	Primed NSC	FBXO22
1.39613e-26	0.254097	0.505	0.392	4.68234e-22	Primed NSC	CCDC66
1.64362e-26	0.348693	0.575	0.458	5.51238e-22	Primed NSC	ZDHHC14
1.67716e-26	0.250481	0.834	0.727	5.62485e-22	Primed NSC	DLG1
1.85402e-26	0.491236	0.387	0.27	6.218e-22	Primed NSC	ADAMTS17
1.94784e-26	0.287099	0.65	0.549	6.53265e-22	Primed NSC	ENSA
3.49473e-26	0.298004	0.586	0.479	1.17206e-21	Primed NSC	RASA2
4.98708e-26	0.259644	0.646	0.536	1.67257e-21	Primed NSC	VPS54
5.01424e-26	0.521684	0.546	0.447	1.68168e-21	Primed NSC	TMTC1
5.20212e-26	0.263013	0.357	0.248	1.74469e-21	Primed NSC	NUDT9
5.26522e-26	0.307607	0.783	0.69	1.76585e-21	Primed NSC	MARK1
5.73059e-26	0.305221	0.811	0.688	1.92193e-21	Primed NSC	CECR2
5.78476e-26	0.279526	0.483	0.372	1.94009e-21	Primed NSC	MYO19
5.90469e-26	0.255826	0.479	0.373	1.98032e-21	Primed NSC	KLHDC4
6.38021e-26	0.291695	0.532	0.412	2.1398e-21	Primed NSC	TRAF3
6.76756e-26	0.259018	0.761	0.666	2.2697e-21	Primed NSC	ZMIZ1
8.7285e-26	0.345113	0.585	0.481	2.92736e-21	Primed NSC	NEK7
1.11331e-25	0.257448	0.663	0.568	3.73382e-21	Primed NSC	PTPN12
1.41392e-25	0.261756	0.437	0.322	4.74199e-21	Primed NSC	PARP14
1.47054e-25	0.305012	0.716	0.604	4.9319e-21	Primed NSC	AFF1
1.67214e-25	0.275534	0.339	0.232	5.60803e-21	Primed NSC	XPC
1.96188e-25	0.330098	0.502	0.395	6.57974e-21	Primed NSC	ZC3H12C
2.22101e-25	0.420379	0.31	0.203	7.44881e-21	Primed NSC	BAG3
2.54805e-25	0.469663	0.25	0.145	8.54566e-21	Primed NSC	LINC01505
2.5899e-25	0.392885	0.679	0.569	8.68601e-21	Primed NSC	PCSK5
2.70909e-25	0.419354	0.464	0.353	9.08573e-21	Primed NSC	DDR2
2.74976e-25	0.280547	0.386	0.278	9.22213e-21	Primed NSC	PSMD5
2.92653e-25	0.276244	0.654	0.557	9.81498e-21	Primed NSC	CDC73
3.16748e-25	0.256838	0.997	0.867	1.06231e-20	Primed NSC	DST
3.62379e-25	0.254279	0.682	0.559	1.21535e-20	Primed NSC	ANO6
3.6919e-25	0.258191	0.558	0.456	1.23819e-20	Primed NSC	GON4L
3.87432e-25	0.276855	0.306	0.202	1.29937e-20	Primed NSC	ADSS
3.99786e-25	0.270697	0.679	0.586	1.3408e-20	Primed NSC	NBDY
4.3189e-25	0.296061	0.675	0.589	1.44847e-20	Primed NSC	TBCD
4.52423e-25	0.284472	0.635	0.518	1.51734e-20	Primed NSC	SHLD2
7.86292e-25	0.274746	0.482	0.377	2.63707e-20	Primed NSC	FKBP10
1.142e-24	0.254548	0.739	0.621	3.83003e-20	Primed NSC	VWA8
1.29846e-24	0.30345	0.808	0.711	4.35477e-20	Primed NSC	TTTY14
1.70718e-24	0.462665	0.709	0.632	5.72555e-20	Primed NSC	PID1
1.77765e-24	0.295486	0.484	0.376	5.96187e-20	Primed NSC	CORO1C
1.84091e-24	0.380076	0.396	0.288	6.17404e-20	Primed NSC	PDGFC
2.70493e-24	0.356395	0.689	0.561	9.07179e-20	Primed NSC	EVA1C
2.90132e-24	0.320371	0.827	0.715	9.73043e-20	Primed NSC	ZNF532
3.14491e-24	0.257472	0.363	0.254	1.05474e-19	Primed NSC	ACO1
3.42943e-24	0.255155	0.639	0.529	1.15016e-19	Primed NSC	ARFGEF2
3.45822e-24	0.267718	0.484	0.384	1.15982e-19	Primed NSC	ZNF75A
3.52375e-24	0.421808	0.657	0.579	1.18179e-19	Primed NSC	FAM85B
3.66387e-24	0.256583	0.803	0.689	1.22879e-19	Primed NSC	WDPCP
3.85859e-24	0.332971	0.752	0.647	1.29409e-19	Primed NSC	ANKRD28
5.94521e-24	0.341245	0.473	0.36	1.99391e-19	Primed NSC	ELOVL5
6.10995e-24	0.259392	0.378	0.271	2.04916e-19	Primed NSC	IDE
6.21506e-24	0.253056	0.431	0.324	2.08441e-19	Primed NSC	HPS5
6.59272e-24	0.295396	0.515	0.396	2.21107e-19	Primed NSC	TAF3
7.28687e-24	0.285671	0.334	0.228	2.44387e-19	Primed NSC	DCBLD2
7.60138e-24	0.251629	0.431	0.317	2.54935e-19	Primed NSC	LARP1B
7.95894e-24	0.301617	0.415	0.305	2.66927e-19	Primed NSC	EPHB2
1.11176e-23	0.341879	0.572	0.478	3.72862e-19	Primed NSC	WDR41
1.71592e-23	0.255488	0.387	0.281	5.75485e-19	Primed NSC	TUT7
1.88684e-23	0.564216	0.448	0.356	6.32807e-19	Primed NSC	LRRN1
2.13123e-23	0.259614	0.611	0.509	7.14772e-19	Primed NSC	RIC8B
2.16073e-23	0.260681	0.267	0.168	7.24667e-19	Primed NSC	SERPINH1
2.31831e-23	0.620094	0.367	0.26	7.77514e-19	Primed NSC	KCNMB2-AS1
2.84233e-23	0.281186	0.337	0.233	9.5326e-19	Primed NSC	MFAP3
3.22837e-23	0.410319	0.516	0.41	1.08273e-18	Primed NSC	GALNT18
3.57064e-23	0.251536	0.548	0.446	1.19752e-18	Primed NSC	LARS2
3.65079e-23	0.260421	0.724	0.627	1.2244e-18	Primed NSC	LARGE1
3.79388e-23	0.256013	0.536	0.424	1.27239e-18	Primed NSC	TYW1B
6.20885e-23	0.281485	0.748	0.642	2.08232e-18	Primed NSC	HDAC8
6.41009e-23	0.346744	0.661	0.572	2.14982e-18	Primed NSC	FGFR1
6.83401e-23	0.308849	0.69	0.593	2.29199e-18	Primed NSC	GMDS
6.87631e-23	0.258176	0.531	0.427	2.30618e-18	Primed NSC	SLC25A26
7.22547e-23	0.790991	0.605	0.52	2.42328e-18	Primed NSC	HIP1
1.02541e-22	0.309432	0.553	0.446	3.43902e-18	Primed NSC	SRBD1
1.54614e-22	0.256364	0.707	0.608	5.18545e-18	Primed NSC	CLEC16A
1.85872e-22	0.349035	0.288	0.187	6.23377e-18	Primed NSC	NEK10
2.30297e-22	1.75869	0.313	0.217	7.72368e-18	Primed NSC	AC007402.1
2.3959e-22	0.449234	0.907	0.856	8.03537e-18	Primed NSC	NLGN1
3.98258e-22	0.270089	0.527	0.428	1.33568e-17	Primed NSC	HADHB
4.96597e-22	0.309002	0.608	0.503	1.66549e-17	Primed NSC	RHOBTB3
5.67803e-22	0.344175	0.81	0.718	1.9043e-17	Primed NSC	CNTNAP3B
6.32854e-22	0.275755	0.993	0.897	2.12247e-17	Primed NSC	PPP2R2B
6.90254e-22	0.256309	0.476	0.376	2.31497e-17	Primed NSC	STK40
8.95288e-22	0.311109	0.545	0.453	3.00262e-17	Primed NSC	FNIP2
1.08689e-21	0.779581	0.276	0.181	3.64522e-17	Primed NSC	GPR158
1.21197e-21	0.327101	0.627	0.53	4.06472e-17	Primed NSC	PDLIM5
3.25375e-21	0.327322	0.484	0.394	1.09124e-16	Primed NSC	RBAK-RBAKDN
4.96534e-21	0.259515	0.608	0.504	1.66527e-16	Primed NSC	AC139887.2
6.06753e-21	0.584523	0.42	0.318	2.03493e-16	Primed NSC	SPOCK1
7.90746e-21	0.270779	0.359	0.258	2.652e-16	Primed NSC	SYTL2
8.72551e-21	0.293329	0.427	0.33	2.92636e-16	Primed NSC	MKRN3
9.62851e-21	0.549831	0.61	0.543	3.22921e-16	Primed NSC	SLC22A23
1.57895e-20	0.287741	0.612	0.515	5.29548e-16	Primed NSC	HS2ST1
1.67448e-20	0.399555	0.256	0.166	5.61586e-16	Primed NSC	ARSJ
2.11354e-20	0.269693	0.568	0.473	7.08839e-16	Primed NSC	ARID5B
7.68034e-20	0.293217	0.329	0.234	2.57583e-15	Primed NSC	AC009093.2
1.05887e-19	0.48289	0.488	0.4	3.55124e-15	Primed NSC	PDZD2
2.08503e-19	0.280346	0.771	0.649	6.99276e-15	Primed NSC	ETV6
2.26035e-19	0.250233	0.444	0.346	7.58078e-15	Primed NSC	LINC00662
2.27584e-19	0.431191	0.973	0.82	7.63271e-15	Primed NSC	PITPNC1
3.12282e-19	0.259586	0.314	0.219	1.04733e-14	Primed NSC	CDKL1
3.94072e-19	0.335183	0.722	0.643	1.32164e-14	Primed NSC	BCAS3
5.25253e-19	0.387502	0.485	0.376	1.76159e-14	Primed NSC	ADAMTS9-AS2
5.59827e-19	0.33034	0.3	0.206	1.87755e-14	Primed NSC	VLDLR-AS1
1.73862e-18	0.280719	0.356	0.272	5.83097e-14	Primed NSC	THAP6
1.94881e-18	0.276452	0.524	0.428	6.53592e-14	Primed NSC	ELF1
2.23568e-18	0.485207	0.337	0.247	7.49801e-14	Primed NSC	RNLS
2.99757e-18	0.407329	0.314	0.219	1.00533e-13	Primed NSC	ABTB2
3.33845e-18	0.267396	0.617	0.538	1.11965e-13	Primed NSC	CBLB
3.42964e-18	0.265388	0.439	0.351	1.15023e-13	Primed NSC	AC074032.1
3.76011e-18	0.368567	0.682	0.585	1.26107e-13	Primed NSC	ASTN2
4.64765e-18	0.385017	0.381	0.285	1.55873e-13	Primed NSC	TOX3
6.45618e-18	0.266277	0.503	0.408	2.16527e-13	Primed NSC	LIN52
6.75508e-18	0.307397	0.682	0.583	2.26552e-13	Primed NSC	2022-03-01
9.89768e-18	0.291076	0.94	0.786	3.31948e-13	Primed NSC	GLIS3
1.71021e-17	0.294189	0.58	0.515	5.73569e-13	Primed NSC	DENND2A
2.10769e-17	0.313945	0.359	0.274	7.06876e-13	Primed NSC	MERTK
7.67771e-17	0.284742	0.495	0.424	2.57495e-12	Primed NSC	SRGAP2
9.65639e-17	0.309895	0.499	0.429	3.23856e-12	Primed NSC	NCOR2
1.68522e-16	0.25483	0.684	0.619	5.65189e-12	Primed NSC	ABI1
1.7355e-16	0.492166	0.703	0.642	5.82052e-12	Primed NSC	AFF3
2.17765e-16	0.250725	0.311	0.226	7.30341e-12	Primed NSC	IL6R
2.64927e-16	0.304895	0.939	0.83	8.88513e-12	Primed NSC	PDE4B
2.92441e-16	0.279116	0.551	0.454	9.80788e-12	Primed NSC	HOPX
3.80418e-16	0.269585	0.384	0.294	1.27585e-11	Primed NSC	NEDD4
4.22407e-16	0.328671	0.689	0.619	1.41667e-11	Primed NSC	MGST1
1.11702e-15	0.270808	0.528	0.454	3.74627e-11	Primed NSC	P4HA1
1.24446e-15	0.265087	0.818	0.686	4.17367e-11	Primed NSC	NHSL1
1.53573e-15	0.26538	0.532	0.454	5.15053e-11	Primed NSC	HLCS
1.95269e-15	0.286604	0.344	0.262	6.54892e-11	Primed NSC	ITGA9
3.26633e-15	0.314281	0.25	0.173	1.09546e-10	Primed NSC	LAMA3
3.83487e-15	0.896538	0.308	0.229	1.28614e-10	Primed NSC	LHFPL3
4.75841e-15	0.298547	0.356	0.27	1.59588e-10	Primed NSC	PROS1
5.22128e-15	0.274809	0.995	0.933	1.75111e-10	Primed NSC	LSAMP
1.4017e-14	0.29895	0.868	0.791	4.70102e-10	Primed NSC	ATXN1
1.84798e-14	0.288483	0.324	0.247	6.19775e-10	Primed NSC	MRPS30-DT
2.05137e-14	0.342566	0.311	0.228	6.87987e-10	Primed NSC	PDE10A
2.38928e-14	0.500609	0.846	0.781	8.01315e-10	Primed NSC	SMYD3
3.07854e-14	0.292484	0.517	0.445	1.03248e-09	Primed NSC	GRB10
7.17758e-14	0.300418	0.428	0.333	2.40722e-09	Primed NSC	PRELID2
1.01577e-13	0.297663	0.634	0.562	3.40667e-09	Primed NSC	RASSF8
1.17428e-13	0.265572	0.451	0.373	3.93831e-09	Primed NSC	PRIM2
1.40106e-13	0.276134	0.25	0.178	4.69889e-09	Primed NSC	AC008467.1
1.56131e-13	0.413711	0.26	0.19	5.23632e-09	Primed NSC	C10orf90
1.80994e-13	0.253549	0.482	0.4	6.07019e-09	Primed NSC	UBE3D
2.06382e-13	0.372296	0.493	0.42	6.92164e-09	Primed NSC	CENPP
2.08905e-13	0.267824	0.812	0.726	7.00624e-09	Primed NSC	BACH2
5.92207e-13	0.317376	0.256	0.188	1.98614e-08	Primed NSC	MAP3K1
1.0815e-12	0.292391	0.708	0.664	3.62713e-08	Primed NSC	EPN2
3.12321e-12	0.25887	0.429	0.36	1.04746e-07	Primed NSC	SMAD3
3.38352e-12	0.286256	0.256	0.184	1.13476e-07	Primed NSC	NTN1
5.33465e-12	0.277578	0.436	0.379	1.78913e-07	Primed NSC	SNX25
5.55868e-12	0.434456	0.401	0.326	1.86427e-07	Primed NSC	CACNA1A
8.28667e-12	0.300956	0.337	0.258	2.77918e-07	Primed NSC	PRRX1
1.19702e-11	0.275515	0.337	0.271	4.01455e-07	Primed NSC	C11orf65
1.46203e-11	0.270385	0.616	0.548	4.90336e-07	Primed NSC	CAMKMT
3.88134e-11	0.322846	0.341	0.273	1.30172e-06	Primed NSC	AC087564.1
4.82979e-11	0.253671	0.446	0.382	1.61982e-06	Primed NSC	HIBADH
5.36821e-11	0.266329	0.452	0.393	1.80039e-06	Primed NSC	KSR1
9.64729e-11	0.391126	0.277	0.214	3.23551e-06	Primed NSC	AC027288.3
9.97408e-11	0.403747	0.505	0.473	3.34511e-06	Primed NSC	MYO16
1.2578e-10	0.252728	0.428	0.37	4.21842e-06	Primed NSC	SLC39A14
1.62588e-10	0.30367	0.46	0.399	5.45287e-06	Primed NSC	PLOD2
2.27147e-10	0.36941	0.658	0.601	7.61807e-06	Primed NSC	CLIC4
8.43777e-10	0.333748	0.435	0.384	2.82986e-05	Primed NSC	COBL
9.03073e-10	0.421283	0.449	0.411	3.02873e-05	Primed NSC	ZFYVE28
2.26139e-09	0.291337	0.254	0.195	7.58426e-05	Primed NSC	AC007364.1
4.0957e-09	0.314249	0.488	0.427	0.000137362	Primed NSC	LPAR1
8.17043e-09	0.284144	0.29	0.234	0.00027402	Primed NSC	HRH1
9.28597e-09	0.321569	0.322	0.264	0.000311433	Primed NSC	KCNIP1
1.35884e-08	0.273152	0.506	0.45	0.000455728	Primed NSC	SNTB1
3.91801e-08	0.337007	0.397	0.373	0.00131402	Primed NSC	ITGA7
6.39739e-08	0.254972	0.706	0.656	0.00214556	Primed NSC	PLCB1
8.99564e-07	0.31016	0.585	0.554	0.0301696	Primed NSC	SNCAIP
1.29807e-06	0.276884	0.446	0.412	0.0435348	Primed NSC	ABHD3
4.4352e-06	0.316945	0.39	0.358	0.148748	Primed NSC	BICC1
6.51863e-06	0.316045	0.281	0.238	0.218622	Primed NSC	ZEB1-AS1
1.12977e-05	0.384944	0.652	0.623	0.378904	Primed NSC	NTNG1
1.6274e-05	0.301995	0.303	0.261	0.545798	Primed NSC	SEZ6L
1.69653e-05	0.267992	0.382	0.343	0.568982	Primed NSC	CASC2
0.00011669	0.275892	0.495	0.492	1	Primed NSC	HIVEP3
0.00015785	0.88175	0.429	0.416	1	Primed NSC	RASGEF1B
0.00251642	0.250392	0.622	0.611	1	Primed NSC	NAALADL2
1.43358e-155	3.17056	0.738	0.727	4.80794e-151	aNSC	SPP1
1.24814e-128	0.307508	0.151	0.732	4.18601e-124	aNSC	HP1BP3
5.63342e-128	0.268819	0.188	0.815	1.88934e-123	aNSC	KIAA1109
1.29555e-122	0.292824	0.165	0.746	4.34503e-118	aNSC	ABI2
1.72156e-120	0.269487	0.155	0.719	5.77378e-116	aNSC	HNRNPH1
1.46865e-118	0.27015	0.186	0.786	4.92555e-114	aNSC	CEP170
3.49508e-118	0.312946	0.181	0.773	1.17218e-113	aNSC	KMT2A
5.88031e-117	0.312872	0.193	0.793	1.97214e-112	aNSC	2022-03-06
1.74419e-116	0.316846	0.218	0.849	5.84967e-112	aNSC	HNRNPA2B1
2.71607e-116	0.346588	0.2	0.805	9.10916e-112	aNSC	AC124312.1
6.85457e-116	0.296106	0.166	0.733	2.29889e-111	aNSC	SNRNP70
3.88186e-115	0.297688	0.117	0.625	1.3019e-110	aNSC	DYNC1LI2
1.36171e-114	0.567533	0.118	0.628	4.56689e-110	aNSC	CEP350
3.22968e-114	0.355581	0.156	0.707	1.08317e-109	aNSC	SRSF11
8.27216e-114	0.411378	0.173	0.741	2.77432e-109	aNSC	ARGLU1
6.9359e-113	0.256651	0.122	0.627	2.32616e-108	aNSC	BOD1L1
5.53236e-112	0.280749	0.124	0.632	1.85544e-107	aNSC	PSMD1
4.87316e-110	0.259697	0.147	0.677	1.63436e-105	aNSC	USP15
5.43439e-110	0.407769	0.144	0.67	1.82259e-105	aNSC	WNK1
1.00376e-109	0.296372	0.129	0.637	3.36642e-105	aNSC	PREPL
1.00483e-108	0.338952	0.109	0.593	3.37e-104	aNSC	CDC42BPB
4.46158e-108	0.254322	0.103	0.579	1.49632e-103	aNSC	KIF5B
8.95031e-108	0.448175	0.185	0.755	3.00176e-103	aNSC	SON
9.5486e-108	0.453013	0.133	0.644	3.20241e-103	aNSC	SLC3A2
1.613e-107	0.376992	0.157	0.692	5.40969e-103	aNSC	PRRC2C
1.89847e-107	0.257291	0.141	0.654	6.36708e-103	aNSC	TNPO1
6.22211e-107	0.320873	0.224	0.835	2.08677e-102	aNSC	PRRC2B
7.21847e-106	0.300112	0.198	0.777	2.42093e-101	aNSC	MAPK1
4.52746e-105	0.351224	0.245	0.876	1.51842e-100	aNSC	CCDC88A
6.0317e-105	0.285594	0.196	0.764	2.02291e-100	aNSC	CAMSAP2
6.9203e-105	0.441675	0.141	0.653	2.32093e-100	aNSC	TSPAN3
5.36941e-104	0.267601	0.087	0.535	1.80079e-99	aNSC	ICE1
2.37927e-103	0.345658	0.213	0.802	7.97959e-99	aNSC	ATRX
3.45988e-103	1.89287	0.739	0.845	1.16037e-98	aNSC	HSP90AA1
1.4774e-102	0.321081	0.203	0.78	4.95492e-98	aNSC	HERC1
1.73152e-102	0.338028	0.143	0.647	5.80718e-98	aNSC	PTPRS
2.62037e-101	0.485717	0.121	0.6	8.78819e-97	aNSC	KTN1
4.32817e-101	0.41523	0.142	0.641	1.45158e-96	aNSC	KIF2A
4.3303e-101	0.256673	0.096	0.547	1.4523e-96	aNSC	TMED10
7.48267e-101	0.380639	0.173	0.708	2.50954e-96	aNSC	RAB2A
7.17217e-100	0.286411	0.252	0.879	2.4054e-95	aNSC	KIDINS220
1.21256e-99	0.282104	0.133	0.62	4.06668e-95	aNSC	USP9X
3.7134e-99	0.443536	0.108	0.567	1.2454e-94	aNSC	LAMP2
7.09374e-99	0.268101	0.09	0.529	2.3791e-94	aNSC	SACS
4.56025e-98	0.30436	0.138	0.624	1.52942e-93	aNSC	PAPOLA
9.78116e-98	0.393664	0.108	0.563	3.28041e-93	aNSC	UBA6
1.37466e-97	0.330178	0.101	0.545	4.61034e-93	aNSC	UBXN4
4.33919e-97	0.330789	0.127	0.6	1.45528e-92	aNSC	ARHGAP35
9.10346e-97	0.381211	0.135	0.615	3.05312e-92	aNSC	VAPA
1.18625e-96	0.40144	0.126	0.596	3.97844e-92	aNSC	HNRNPR
1.91428e-96	0.27769	0.111	0.565	6.42012e-92	aNSC	POM121
2.43136e-96	0.264786	0.1	0.539	8.1543e-92	aNSC	CCNL2
3.99119e-96	0.311426	0.103	0.547	1.33857e-91	aNSC	KIFAP3
7.29389e-95	0.446774	0.123	0.584	2.44622e-90	aNSC	LARS
2.2597e-94	0.284107	0.1	0.533	7.57857e-90	aNSC	KLHL23
3.90197e-94	0.387425	0.133	0.605	1.30864e-89	aNSC	SF3B1
7.10523e-94	0.525996	0.15	0.64	2.38295e-89	aNSC	CIRBP
1.6186e-93	0.501699	0.164	0.669	5.42848e-89	aNSC	PRKDC
1.85583e-93	0.474795	0.145	0.626	6.22408e-89	aNSC	PPP3CB
1.87904e-93	0.436963	0.161	0.662	6.30194e-89	aNSC	HNRNPA3
5.02748e-93	0.289625	0.071	0.473	1.68611e-88	aNSC	MUM1
1.40641e-92	0.373518	0.095	0.522	4.71681e-88	aNSC	ACADVL
3.93591e-92	0.380582	0.107	0.544	1.32003e-87	aNSC	ILF3
1.64086e-91	0.340902	0.143	0.617	5.50311e-87	aNSC	HNRNPM
6.57017e-91	0.28414	0.111	0.55	2.2035e-86	aNSC	MAN1A2
2.0892e-90	0.269662	0.102	0.529	7.00674e-86	aNSC	RPRD1A
2.22481e-90	0.282251	0.105	0.534	7.46157e-86	aNSC	TACC1
3.88793e-90	0.26798	0.068	0.459	1.30393e-85	aNSC	NIN
9.52219e-90	0.386098	0.132	0.589	3.19355e-85	aNSC	GLS
1.89712e-89	0.270819	0.125	0.573	6.36257e-85	aNSC	SESN3
2.49116e-89	0.425024	0.139	0.601	8.35487e-85	aNSC	NFIX
3.42238e-89	0.35268	0.105	0.531	1.1478e-84	aNSC	ZNF106
1.64161e-88	0.335461	0.106	0.532	5.50565e-84	aNSC	RNF149
1.83067e-88	0.326766	0.172	0.667	6.13972e-84	aNSC	SPRED1
3.90899e-88	0.373961	0.153	0.625	1.311e-83	aNSC	UBE2B
4.80643e-88	0.260432	0.091	0.499	1.61198e-83	aNSC	PAK2
5.51447e-88	0.405832	0.106	0.529	1.84944e-83	aNSC	MAPK8IP3
6.69197e-88	0.411114	0.1	0.518	2.24435e-83	aNSC	LNPEP
1.10637e-87	0.31769	0.13	0.577	3.71055e-83	aNSC	YWHAQ
1.12817e-87	0.325974	0.114	0.546	3.78366e-83	aNSC	SLC23A2
1.21203e-86	0.562604	0.193	0.711	4.06492e-82	aNSC	CLTC
5.78933e-86	0.390273	0.106	0.524	1.94163e-81	aNSC	SLC25A36
1.05186e-85	0.259895	0.082	0.473	3.52772e-81	aNSC	GRIK5
3.8433e-85	0.35219	0.168	0.65	1.28897e-80	aNSC	FNBP1L
5.57719e-85	0.276646	0.06	0.43	1.87048e-80	aNSC	HEPACAM
6.86877e-85	0.28215	0.088	0.484	2.30365e-80	aNSC	UBE4A
2.91603e-84	0.357068	0.111	0.529	9.77977e-80	aNSC	CHD8
3.58958e-84	0.45423	0.113	0.535	1.20387e-79	aNSC	GNPTAB
4.34786e-84	0.358416	0.101	0.508	1.45818e-79	aNSC	SKI
1.7742e-83	0.415068	0.092	0.49	5.95032e-79	aNSC	SCRN1
1.9056e-83	0.404074	0.173	0.654	6.39098e-79	aNSC	SPTAN1
2.73414e-83	0.328196	0.096	0.497	9.16975e-79	aNSC	C7orf50
3.2476e-83	0.578329	0.182	0.678	1.08918e-78	aNSC	OCIAD1
1.20187e-82	0.363142	0.083	0.468	4.03083e-78	aNSC	SUGT1
1.94697e-82	0.262329	0.084	0.469	6.52975e-78	aNSC	TAX1BP1
2.00542e-82	0.484397	0.133	0.571	6.72576e-78	aNSC	NAP1L1
2.53595e-82	0.255363	0.068	0.436	8.50505e-78	aNSC	EDEM3
5.22835e-82	0.748499	0.2	0.715	1.75348e-77	aNSC	AKAP9
6.63837e-82	0.410544	0.202	0.71	2.22638e-77	aNSC	PGAP1
1.15178e-81	0.306698	0.091	0.481	3.86285e-77	aNSC	AKAP8L
1.48276e-81	0.268353	0.086	0.469	4.97288e-77	aNSC	PPP4R2
1.7813e-81	0.536374	0.146	0.594	5.97414e-77	aNSC	NPTN
1.8004e-81	0.267337	0.083	0.462	6.03818e-77	aNSC	FAM208A
3.30396e-81	0.567969	0.208	0.726	1.10808e-76	aNSC	HNRNPDL
3.77751e-81	0.287476	0.079	0.456	1.2669e-76	aNSC	SH3GLB1
8.86503e-81	0.259963	0.124	0.545	2.97315e-76	aNSC	ARID5B
1.12935e-80	0.565357	0.13	0.559	3.7876e-76	aNSC	SCARB2
4.82831e-80	0.298723	0.086	0.465	1.61932e-75	aNSC	TMEM245
7.47292e-80	0.309908	0.097	0.487	2.50627e-75	aNSC	ST13
7.72629e-80	0.399457	0.269	0.866	2.59124e-75	aNSC	MYCBP2
1.93114e-79	0.377434	0.107	0.507	6.47666e-75	aNSC	FAM49B
4.35618e-79	0.602174	0.198	0.701	1.46098e-74	aNSC	NDFIP1
5.54834e-79	0.255322	0.099	0.487	1.8608e-74	aNSC	UBQLN1
6.65661e-79	0.270051	0.096	0.482	2.2325e-74	aNSC	EIF4B
8.17612e-79	0.385198	0.183	0.664	2.74211e-74	aNSC	PDS5B
1.44866e-78	0.54	0.206	0.712	4.8585e-74	aNSC	HNRNPU
1.56066e-78	0.363926	0.125	0.54	5.23415e-74	aNSC	TOP2B
1.74889e-78	0.443783	0.172	0.635	5.86544e-74	aNSC	LMO3
2.27255e-78	0.364452	0.115	0.52	7.62169e-74	aNSC	ATP6V1A
2.75445e-78	0.433714	0.096	0.483	9.23787e-74	aNSC	ADAR
4.35758e-78	0.466105	0.119	0.526	1.46144e-73	aNSC	DDX6
6.63721e-78	0.5854	0.21	0.72	2.22599e-73	aNSC	MTDH
7.75898e-78	0.561187	0.174	0.644	2.60221e-73	aNSC	LARP1
8.79951e-78	0.387677	0.13	0.549	2.95118e-73	aNSC	HSPA9
9.43826e-78	0.560151	0.115	0.521	3.1654e-73	aNSC	PTTG1IP
9.79644e-78	0.332875	0.1	0.487	3.28553e-73	aNSC	DDX3X
1.00637e-77	0.560476	0.104	0.496	3.37517e-73	aNSC	FAM213A
1.31565e-77	0.404346	0.096	0.481	4.41244e-73	aNSC	NMT1
1.46337e-77	0.367145	0.115	0.519	4.90784e-73	aNSC	INPP5F
1.6447e-77	0.257239	0.062	0.411	5.51599e-73	aNSC	MAVS
2.11981e-77	0.528197	0.14	0.568	7.1094e-73	aNSC	PPP2CB
3.11568e-77	0.268217	0.09	0.466	1.04494e-72	aNSC	IFRD1
8.40537e-77	0.355381	0.077	0.439	2.81899e-72	aNSC	KLHL42
1.25212e-76	0.414146	0.138	0.56	4.19936e-72	aNSC	SMARCA4
1.28937e-76	0.399545	0.074	0.433	4.32427e-72	aNSC	FZD3
1.37814e-76	0.293999	0.087	0.457	4.62199e-72	aNSC	LMNA
1.45357e-76	0.569311	0.136	0.558	4.87497e-72	aNSC	KIF3A
1.55359e-76	0.30234	0.085	0.453	5.21044e-72	aNSC	ATAD1
2.18426e-76	0.373494	0.086	0.454	7.32558e-72	aNSC	CSNK1D
2.51906e-76	0.295809	0.084	0.449	8.44843e-72	aNSC	CEP57
3.20779e-76	0.275203	0.066	0.413	1.07583e-71	aNSC	DCTN5
3.46159e-76	0.397205	0.13	0.543	1.16095e-71	aNSC	CCND2
4.10336e-76	0.484652	0.093	0.471	1.37618e-71	aNSC	SLC44A2
7.09659e-76	0.343024	0.078	0.438	2.38006e-71	aNSC	SELENOO
1.21867e-75	0.42862	0.086	0.452	4.08718e-71	aNSC	PTPN11
1.64352e-75	0.262303	0.081	0.44	5.51204e-71	aNSC	SRRM1
2.31723e-75	0.26688	0.093	0.466	7.77151e-71	aNSC	NREP
3.32878e-75	0.371649	0.125	0.529	1.11641e-70	aNSC	DLGAP4
3.41243e-75	0.584009	0.126	0.535	1.14446e-70	aNSC	ABHD2
5.45553e-75	0.314588	0.137	0.553	1.82968e-70	aNSC	ZFP36L1
6.52532e-75	0.327794	0.082	0.441	2.18846e-70	aNSC	ALDH3A2
8.92719e-75	0.508946	0.135	0.55	2.994e-70	aNSC	TM9SF3
1.13983e-74	0.464136	0.143	0.566	3.82275e-70	aNSC	HIF1A
1.68222e-74	0.353974	0.094	0.465	5.64184e-70	aNSC	CAPRIN1
3.45108e-74	0.436783	0.216	0.719	1.15742e-69	aNSC	TSC22D1
4.48518e-74	0.302604	0.069	0.414	1.50424e-69	aNSC	ANAPC5
6.9026e-74	0.271187	0.073	0.422	2.31499e-69	aNSC	TOB2
9.88987e-74	0.291474	0.092	0.459	3.31686e-69	aNSC	CKAP5
1.95717e-73	0.748781	0.22	0.731	6.56397e-69	aNSC	DYNC1H1
2.64761e-73	0.40913	0.11	0.493	8.87957e-69	aNSC	USP14
3.68452e-73	0.255607	0.067	0.406	1.23571e-68	aNSC	ZRANB1
3.85319e-73	0.30226	0.075	0.423	1.29228e-68	aNSC	DEAF1
4.00395e-73	0.36802	0.078	0.43	1.34285e-68	aNSC	XIAP
4.00591e-73	0.469941	0.092	0.458	1.3435e-68	aNSC	C6orf62
4.40341e-73	0.586199	0.204	0.692	1.47682e-68	aNSC	YWHAE
9.59106e-73	0.452	0.264	0.829	3.21665e-68	aNSC	GNB1
9.67414e-73	0.426266	0.129	0.531	3.24451e-68	aNSC	HNRNPH3
1.19626e-72	0.376365	0.302	0.91	4.01203e-68	aNSC	TTC3
2.39599e-72	0.469505	0.106	0.483	8.03565e-68	aNSC	CCPG1
4.54733e-72	0.323419	0.104	0.477	1.52508e-67	aNSC	PHTF2
4.62758e-72	0.317319	0.081	0.431	1.552e-67	aNSC	ZC3H13
9.24485e-72	0.623029	0.124	0.519	3.10054e-67	aNSC	AKAP11
1.24641e-71	0.448783	0.106	0.482	4.18022e-67	aNSC	MGST3
2.19027e-71	0.295276	0.081	0.427	7.34573e-67	aNSC	ZNF326
2.44975e-71	0.316113	0.142	0.552	8.21597e-67	aNSC	PIK3R1
3.77805e-71	0.386682	0.09	0.447	1.26708e-66	aNSC	CD47
4.36955e-71	0.348845	0.088	0.443	1.46546e-66	aNSC	BAZ1B
6.42123e-71	0.345983	0.086	0.438	2.15355e-66	aNSC	PALM
6.58472e-71	0.640411	0.164	0.6	2.20838e-66	aNSC	USP22
8.48456e-71	1.97054	0.695	0.85	2.84555e-66	aNSC	FTL
1.28155e-70	0.590169	0.128	0.522	4.29805e-66	aNSC	NDUFS1
1.57155e-70	0.399731	0.095	0.455	5.27066e-66	aNSC	PPIG
4.35386e-70	0.256561	0.083	0.428	1.4602e-65	aNSC	CLK1
7.83083e-70	0.335378	0.073	0.409	2.62631e-65	aNSC	SNX27
9.92082e-70	0.431042	0.086	0.435	3.32725e-65	aNSC	ATN1
1.57725e-69	0.590014	0.114	0.492	5.28977e-65	aNSC	ATP1B2
2.05481e-69	0.564604	0.144	0.553	6.89142e-65	aNSC	CSDE1
2.83386e-69	0.522303	0.119	0.499	9.5042e-65	aNSC	GOLM1
5.54399e-69	0.347745	0.082	0.424	1.85934e-64	aNSC	STT3B
6.67034e-69	0.261171	0.097	0.454	2.2371e-64	aNSC	PRKAR2A
7.93286e-69	0.516517	0.162	0.587	2.66052e-64	aNSC	FAM171B
9.00161e-69	0.36452	0.073	0.406	3.01896e-64	aNSC	UBA1
1.62659e-68	0.435736	0.109	0.477	5.45527e-64	aNSC	CAND1
2.77899e-68	0.357105	0.086	0.43	9.32017e-64	aNSC	TRAP1
2.90837e-68	0.323955	0.076	0.411	9.75408e-64	aNSC	SAMD8
2.96791e-68	0.434629	0.088	0.434	9.95379e-64	aNSC	MLEC
3.6435e-68	0.585923	0.202	0.671	1.22196e-63	aNSC	PRKACB
7.57534e-68	0.733112	0.19	0.646	2.54062e-63	aNSC	NUCKS1
8.94861e-68	0.359711	0.09	0.436	3.00118e-63	aNSC	MYO9B
1.01501e-67	0.424539	0.122	0.499	3.40413e-63	aNSC	ARPC2
1.0791e-67	0.658711	0.176	0.613	3.61909e-63	aNSC	PLD3
2.38492e-67	0.275385	0.083	0.419	7.99856e-63	aNSC	GSPT1
3.06491e-67	0.477845	0.172	0.598	1.02791e-62	aNSC	EIF3H
6.16448e-67	0.443911	0.084	0.421	2.06744e-62	aNSC	C6orf89
9.72382e-67	0.413088	0.092	0.437	3.26118e-62	aNSC	FADS2
1.03502e-66	0.295058	0.062	0.378	3.47124e-62	aNSC	CTSA
1.32606e-66	0.830212	0.186	0.633	4.44734e-62	aNSC	SEC62
1.50905e-66	0.357305	0.074	0.401	5.06105e-62	aNSC	CDKL5
1.68247e-66	0.298006	0.069	0.39	5.64266e-62	aNSC	SLC25A46
1.99128e-66	0.468585	0.1	0.451	6.67837e-62	aNSC	FEZ1
2.23865e-66	0.263788	0.06	0.373	7.50798e-62	aNSC	ME2
2.35917e-66	0.404237	0.078	0.408	7.91217e-62	aNSC	IFNAR1
2.88836e-66	0.343355	0.085	0.419	9.68698e-62	aNSC	G3BP1
3.71261e-66	0.341653	0.075	0.401	1.24513e-61	aNSC	GTF3C1
8.57774e-66	0.501636	0.108	0.466	2.8768e-61	aNSC	ITGAV
8.68765e-66	0.256775	0.07	0.39	2.91366e-61	aNSC	C12orf49
9.61743e-66	0.365086	0.092	0.433	3.22549e-61	aNSC	DDB1
9.72309e-66	0.308997	0.086	0.421	3.26093e-61	aNSC	PCNP
1.20571e-65	0.472211	0.136	0.52	4.04371e-61	aNSC	MORF4L2
1.3659e-65	0.396912	0.109	0.467	4.58097e-61	aNSC	DCAF7
3.78856e-65	0.417894	0.102	0.451	1.27061e-60	aNSC	UBL3
4.04215e-65	0.52993	0.144	0.535	1.35565e-60	aNSC	TXNRD1
4.71389e-65	0.40044	0.12	0.488	1.58094e-60	aNSC	PKP4
4.71711e-65	0.61676	0.165	0.58	1.58202e-60	aNSC	ATP9A
6.02496e-65	0.557325	0.112	0.472	2.02065e-60	aNSC	AP3D1
6.65743e-65	0.342289	0.083	0.411	2.23277e-60	aNSC	TOR1AIP2
7.66197e-65	0.433291	0.12	0.486	2.56967e-60	aNSC	HDGFL3
9.11954e-65	0.299553	0.085	0.416	3.05851e-60	aNSC	ADAM22
1.02822e-64	0.388201	0.07	0.387	3.44845e-60	aNSC	NDUFV1
1.12067e-64	0.295278	0.079	0.404	3.75849e-60	aNSC	NISCH
1.17625e-64	0.288622	0.069	0.383	3.94492e-60	aNSC	TBC1D14
3.1291e-64	0.413383	0.062	0.37	1.04944e-59	aNSC	MIA3
3.75432e-64	0.428824	0.092	0.429	1.25912e-59	aNSC	RTTN
4.51742e-64	0.692013	0.194	0.639	1.51505e-59	aNSC	DDX5
4.62341e-64	0.263323	0.162	0.564	1.5506e-59	aNSC	HDAC9
9.15593e-64	0.473524	0.159	0.561	3.07072e-59	aNSC	DNAJB6
9.61832e-64	0.363834	0.083	0.408	3.22579e-59	aNSC	BLCAP
9.92878e-64	0.507725	0.101	0.444	3.32991e-59	aNSC	FAM3C
1.05089e-63	0.252075	0.056	0.355	3.52446e-59	aNSC	CCDC50
1.18446e-63	0.389104	0.079	0.402	3.97243e-59	aNSC	TM9SF2
1.43137e-63	0.331159	0.076	0.394	4.80052e-59	aNSC	KLHL7
1.53306e-63	0.323372	0.113	0.468	5.14157e-59	aNSC	ATP1B3
1.83793e-63	0.252338	0.066	0.373	6.16405e-59	aNSC	DHX30
2.82235e-63	0.480103	0.1	0.441	9.46559e-59	aNSC	PDZD8
4.95556e-63	0.481338	0.101	0.44	1.662e-58	aNSC	CDC42
8.61318e-63	0.415852	0.096	0.432	2.88869e-58	aNSC	TRIP11
8.6444e-63	0.760681	0.153	0.549	2.89916e-58	aNSC	KLC1
1.00362e-62	0.370396	0.149	0.535	3.36595e-58	aNSC	DNM3
1.2654e-62	0.261244	0.06	0.36	4.24391e-58	aNSC	SMARCD3
1.65267e-62	0.551991	0.139	0.516	5.54272e-58	aNSC	FOXG1
3.26815e-62	0.385262	0.303	0.878	1.09607e-57	aNSC	SEPT7
4.37202e-62	0.373009	0.103	0.442	1.46629e-57	aNSC	FAM168B
6.47681e-62	0.611016	0.146	0.53	2.17219e-57	aNSC	RANBP2
6.94634e-62	0.625495	0.103	0.443	2.32966e-57	aNSC	RCN2
9.43135e-62	0.254299	0.076	0.388	3.16309e-57	aNSC	WDR47
9.88299e-62	0.291561	0.068	0.372	3.31456e-57	aNSC	PCF11
1.30613e-61	0.582272	0.109	0.455	4.38049e-57	aNSC	GOLGA3
2.75711e-61	0.478565	0.093	0.421	9.24679e-57	aNSC	PSIP1
3.56427e-61	0.307517	0.055	0.345	1.19539e-56	aNSC	ZMAT3
4.34538e-61	0.296345	0.074	0.382	1.45735e-56	aNSC	RALGPS2
5.62593e-61	0.253443	0.071	0.375	1.88683e-56	aNSC	HNRNPUL1
5.94233e-61	0.433154	0.182	0.597	1.99294e-56	aNSC	MMP16
6.08898e-61	0.480955	0.104	0.44	2.04212e-56	aNSC	AGTPBP1
1.15818e-60	0.315761	0.062	0.359	3.8843e-56	aNSC	TSC22D4
1.47988e-60	0.364498	0.073	0.379	4.96323e-56	aNSC	APPL1
2.01024e-60	0.560074	0.084	0.4	6.74194e-56	aNSC	TNFRSF1A
2.05197e-60	0.669674	0.128	0.489	6.8819e-56	aNSC	DYNC1I2
2.07506e-60	0.470182	0.103	0.437	6.95933e-56	aNSC	DNM1
2.76785e-60	0.389161	0.064	0.359	9.28281e-56	aNSC	NACC2
2.90569e-60	0.36344	0.1	0.43	9.74512e-56	aNSC	FOS
2.95751e-60	0.370136	0.076	0.384	9.91889e-56	aNSC	CALU
4.98666e-60	0.339885	0.085	0.399	1.67243e-55	aNSC	UBE2N
5.75054e-60	0.62451	0.182	0.601	1.92862e-55	aNSC	CEBPD
6.65344e-60	0.312075	0.084	0.396	2.23143e-55	aNSC	POLR2B
7.02721e-60	0.331929	0.056	0.343	2.35679e-55	aNSC	HACD2
7.9743e-60	0.430427	0.074	0.379	2.67442e-55	aNSC	IPO5
8.89168e-60	0.397159	0.085	0.399	2.98209e-55	aNSC	BTBD8
1.17953e-59	0.546573	0.09	0.41	3.95591e-55	aNSC	SEL1L
1.2461e-59	0.420582	0.095	0.419	4.17915e-55	aNSC	TXNL4A
1.26715e-59	0.25978	0.086	0.399	4.24976e-55	aNSC	DDX18
1.42136e-59	0.509904	0.102	0.432	4.76695e-55	aNSC	ACTR2
1.54217e-59	0.295515	0.081	0.39	5.17214e-55	aNSC	SAFB2
3.06518e-59	0.291245	0.062	0.353	1.028e-54	aNSC	HS6ST1
3.7918e-59	0.407693	0.075	0.378	1.27169e-54	aNSC	ZBTB38
4.09354e-59	0.51267	0.1	0.427	1.37289e-54	aNSC	DNAJC5
5.0787e-59	0.388613	0.069	0.365	1.7033e-54	aNSC	NAPB
7.5181e-59	0.334722	0.312	0.887	2.52142e-54	aNSC	NBEA
8.70399e-59	0.533463	0.102	0.43	2.91914e-54	aNSC	TMEM259
1.07202e-58	0.293261	0.065	0.356	3.59535e-54	aNSC	HMGN3
1.32417e-58	0.530825	0.108	0.441	4.44099e-54	aNSC	EIF3A
1.38072e-58	0.740992	0.135	0.497	4.63065e-54	aNSC	DBI
2.22326e-58	0.371456	0.068	0.361	7.45637e-54	aNSC	C16orf72
2.66237e-58	0.410917	0.121	0.466	8.92906e-54	aNSC	SNRPN
2.82984e-58	0.287769	0.062	0.35	9.49071e-54	aNSC	CPEB2
3.04736e-58	0.598526	0.246	0.735	1.02202e-53	aNSC	R3HDM1
3.18625e-58	0.599997	0.087	0.399	1.06861e-53	aNSC	IL6ST
3.43711e-58	0.313941	0.083	0.389	1.15274e-53	aNSC	MGLL
4.11856e-58	0.503965	0.097	0.419	1.38128e-53	aNSC	EPRS
4.3388e-58	0.789423	0.166	0.559	1.45515e-53	aNSC	KPNB1
5.60604e-58	0.514374	0.096	0.416	1.88015e-53	aNSC	PDXK
6.6811e-58	0.365854	0.075	0.373	2.24071e-53	aNSC	RNF145
9.0374e-58	0.280815	0.057	0.338	3.03096e-53	aNSC	RBM17
9.82529e-58	0.372954	0.078	0.379	3.29521e-53	aNSC	LONP1
1.12367e-57	0.348292	0.072	0.366	3.76855e-53	aNSC	ZCCHC14
1.43033e-57	0.293552	0.081	0.382	4.79705e-53	aNSC	RNF10
2.21014e-57	0.411734	0.073	0.368	7.41237e-53	aNSC	MAP9
3.98562e-57	0.302442	0.058	0.338	1.3367e-52	aNSC	AEBP1
5.12557e-57	0.579861	0.104	0.427	1.71901e-52	aNSC	TMOD2
5.46302e-57	0.289354	0.052	0.325	1.83219e-52	aNSC	GOLGA8A
5.8283e-57	0.322519	0.076	0.372	1.9547e-52	aNSC	CASC3
7.13667e-57	0.345806	0.084	0.386	2.3935e-52	aNSC	ETF1
7.16929e-57	0.506252	0.096	0.412	2.40444e-52	aNSC	TROVE2
7.30053e-57	0.915114	0.165	0.556	2.44845e-52	aNSC	ADGRG1
1.06792e-56	0.293953	0.082	0.381	3.5816e-52	aNSC	ATP6V1D
1.13823e-56	0.41728	0.082	0.382	3.81741e-52	aNSC	SLC39A10
1.18529e-56	0.724652	0.174	0.569	3.97522e-52	aNSC	CRMP1
2.48637e-56	0.431538	0.075	0.369	8.3388e-52	aNSC	TTYH1
2.98878e-56	0.347657	0.09	0.397	1.00238e-51	aNSC	CRK
3.34115e-56	3.02087	0.469	0.356	1.12055e-51	aNSC	MT-CO1
6.20411e-56	0.378108	0.064	0.344	2.08073e-51	aNSC	SRSF2
6.77716e-56	0.774126	0.144	0.506	2.27292e-51	aNSC	LAMP1
7.18676e-56	0.628949	0.141	0.498	2.4103e-51	aNSC	SRRM2
7.43715e-56	0.41643	0.091	0.398	2.49427e-51	aNSC	RTF1
8.85459e-56	0.320472	0.06	0.338	2.96965e-51	aNSC	ARL10
9.02663e-56	0.266783	0.059	0.335	3.02735e-51	aNSC	ZNF24
1.02398e-55	0.652939	0.127	0.469	3.43423e-51	aNSC	CCNI
1.33572e-55	0.433846	0.087	0.388	4.47974e-51	aNSC	HNRNPK
1.34222e-55	0.271502	0.058	0.333	4.50153e-51	aNSC	CDC37
1.68502e-55	0.575148	0.11	0.435	5.65121e-51	aNSC	SNX3
2.10695e-55	0.685301	0.169	0.555	7.06628e-51	aNSC	ACSL3
2.1582e-55	0.453939	0.066	0.347	7.23817e-51	aNSC	PWAR6
2.18267e-55	0.592849	0.096	0.408	7.32024e-51	aNSC	HMGN2
2.30614e-55	0.608426	0.107	0.428	7.73433e-51	aNSC	NCS1
2.40332e-55	0.411059	0.119	0.451	8.06025e-51	aNSC	SORBS2
2.63345e-55	0.318374	0.066	0.346	8.83207e-51	aNSC	ANKLE2
4.19863e-55	0.256496	0.087	0.385	1.40814e-50	aNSC	UBE2I
5.22193e-55	0.371584	0.101	0.412	1.75133e-50	aNSC	EIF5
5.63014e-55	0.831842	0.163	0.541	1.88824e-50	aNSC	CLSTN1
6.53848e-55	0.612919	0.148	0.51	2.19288e-50	aNSC	HACD3
7.6233e-55	0.252604	0.05	0.314	2.5567e-50	aNSC	SAR1B
7.72639e-55	0.459909	0.071	0.355	2.59128e-50	aNSC	EID1
8.33114e-55	0.270284	0.07	0.352	2.7941e-50	aNSC	YIPF4
8.67634e-55	0.399166	0.076	0.365	2.90987e-50	aNSC	SYNJ1
1.03853e-54	0.361403	0.055	0.324	3.48302e-50	aNSC	CFAP36
1.21227e-54	0.531502	0.1	0.411	4.06571e-50	aNSC	PSMC6
1.80701e-54	0.345069	0.056	0.325	6.06035e-50	aNSC	TAPBP
2.16473e-54	0.264505	0.067	0.345	7.26007e-50	aNSC	LIPA
2.66296e-54	0.287556	0.094	0.397	8.93104e-50	aNSC	PTPRJ
2.95361e-54	0.286958	0.066	0.342	9.90583e-50	aNSC	INTS11
5.32845e-54	0.661958	0.166	0.543	1.78706e-49	aNSC	MORF4L1
5.58485e-54	0.643789	0.203	0.619	1.87305e-49	aNSC	CACNA2D1
8.24975e-54	0.457781	0.067	0.344	2.7668e-49	aNSC	SIRPA
1.22305e-53	0.298401	0.048	0.305	4.10188e-49	aNSC	SEPT8
2.07359e-53	0.507582	0.239	0.692	6.95439e-49	aNSC	KIF5C
2.11122e-53	0.547043	0.108	0.422	7.08061e-49	aNSC	APC2
2.39484e-53	0.733677	0.107	0.421	8.03181e-49	aNSC	ZYG11B
2.5103e-53	0.638745	0.18	0.567	8.41905e-49	aNSC	PTGES3
2.68797e-53	0.824343	0.115	0.439	9.01493e-49	aNSC	DDR1
3.54843e-53	0.63538	0.231	0.678	1.19007e-48	aNSC	NR2F1
5.127e-53	0.488709	0.089	0.384	1.71949e-48	aNSC	TPD52L2
8.14032e-53	0.329328	0.086	0.376	2.7301e-48	aNSC	ATL1
1.13762e-52	0.539378	0.144	0.492	3.81536e-48	aNSC	PKIA
1.56907e-52	0.511534	0.109	0.422	5.26234e-48	aNSC	CLTA
1.63639e-52	0.343915	0.053	0.312	5.48811e-48	aNSC	MFSD10
1.64052e-52	0.441503	0.083	0.369	5.50199e-48	aNSC	RPN2
2.05608e-52	0.428692	0.068	0.341	6.89569e-48	aNSC	UFL1
2.13359e-52	0.288698	0.052	0.309	7.15563e-48	aNSC	EDNRB
2.45493e-52	0.269976	0.068	0.339	8.23335e-48	aNSC	COX20
2.83183e-52	0.38181	0.078	0.36	9.49738e-48	aNSC	FBXO21
2.83895e-52	0.419586	0.089	0.381	9.52127e-48	aNSC	RNPS1
2.94609e-52	0.380675	0.073	0.35	9.88059e-48	aNSC	C1orf52
3.44156e-52	0.430952	0.078	0.36	1.15423e-47	aNSC	SEC11C
4.3207e-52	0.541428	0.089	0.382	1.44908e-47	aNSC	LNPK
5.3169e-52	0.282259	0.069	0.34	1.78318e-47	aNSC	ABHD12
7.6851e-52	0.275558	0.054	0.311	2.57743e-47	aNSC	CC2D1A
9.25538e-52	0.258541	0.046	0.295	3.10407e-47	aNSC	SLC38A10
1.18316e-51	0.404645	0.066	0.333	3.96809e-47	aNSC	MEAF6
1.19432e-51	0.314661	0.153	0.499	4.00551e-47	aNSC	SLC4A10
1.25887e-51	0.289809	0.054	0.311	4.222e-47	aNSC	GNPDA1
1.35952e-51	0.546675	0.089	0.379	4.55957e-47	aNSC	PANK3
1.7799e-51	0.32295	0.06	0.323	5.96942e-47	aNSC	RBX1
2.27148e-51	0.444192	0.061	0.324	7.61808e-47	aNSC	LRRC58
3.31165e-51	0.462985	0.076	0.353	1.11066e-46	aNSC	TPM1
3.75557e-51	0.585646	0.096	0.392	1.25954e-46	aNSC	SMARCA5
3.95576e-51	0.393277	0.077	0.354	1.32668e-46	aNSC	EIF3K
4.16575e-51	0.39414	0.064	0.328	1.39711e-46	aNSC	CLCN7
5.50798e-51	0.484155	0.095	0.389	1.84726e-46	aNSC	KLF6
5.73524e-51	0.334003	0.087	0.371	1.92349e-46	aNSC	TXNL1
5.91813e-51	0.337046	0.058	0.316	1.98482e-46	aNSC	GRIPAP1
8.6401e-51	0.490684	0.124	0.444	2.89772e-46	aNSC	SEMA6D
9.73734e-51	0.89072	0.192	0.587	3.26571e-46	aNSC	TIMP2
1.0032e-50	0.251348	0.043	0.287	3.36454e-46	aNSC	CDC25B
1.07136e-50	0.585871	0.099	0.395	3.59312e-46	aNSC	GNB4
1.88288e-50	0.305683	0.067	0.331	6.31479e-46	aNSC	COPB1
2.40385e-50	0.40209	0.065	0.327	8.06204e-46	aNSC	SELENOI
2.87342e-50	0.504069	0.135	0.462	9.63686e-46	aNSC	CDH10
2.9459e-50	0.418197	0.077	0.351	9.87997e-46	aNSC	TMEM59
5.06958e-50	0.329446	0.121	0.433	1.70024e-45	aNSC	CPEB3
7.97026e-50	0.370544	0.073	0.341	2.67306e-45	aNSC	VDAC3
1.60677e-49	0.30658	0.062	0.319	5.38877e-45	aNSC	CYLD
2.0332e-49	0.389024	0.054	0.303	6.81894e-45	aNSC	ANXA5
2.2587e-49	0.386926	0.061	0.317	7.57521e-45	aNSC	STK25
2.32532e-49	0.593505	0.102	0.394	7.79866e-45	aNSC	ZC3H15
2.83486e-49	0.594231	0.095	0.383	9.50754e-45	aNSC	LPCAT1
4.10423e-49	0.281941	0.068	0.328	1.37648e-44	aNSC	ELAVL4
4.59539e-49	0.267194	0.047	0.287	1.5412e-44	aNSC	WBP4
5.07723e-49	0.389448	0.071	0.334	1.7028e-44	aNSC	METTL9
5.45052e-49	0.257211	0.064	0.319	1.828e-44	aNSC	ACVR1B
5.77863e-49	0.329857	0.068	0.328	1.93804e-44	aNSC	EIF2AK1
6.8297e-49	0.585899	0.11	0.409	2.29055e-44	aNSC	SNRNP200
7.96377e-49	0.38599	0.064	0.319	2.67089e-44	aNSC	TUBGCP2
8.15939e-49	0.918547	0.207	0.609	2.7365e-44	aNSC	SYT11
9.50086e-49	0.260652	0.11	0.406	3.1864e-44	aNSC	CDH13
9.84287e-49	0.344746	0.075	0.341	3.3011e-44	aNSC	CLPTM1
1.87706e-48	0.257319	0.076	0.341	6.29528e-44	aNSC	AMD1
2.29371e-48	0.348372	0.09	0.368	7.69264e-44	aNSC	NUDT21
2.39178e-48	0.504913	0.103	0.393	8.02155e-44	aNSC	VCP
2.48493e-48	0.532482	0.11	0.408	8.33397e-44	aNSC	ZNF706
2.97448e-48	0.399639	0.066	0.321	9.97581e-44	aNSC	GSTA4
3.2304e-48	0.252244	0.048	0.286	1.08341e-43	aNSC	COQ4
6.62937e-48	0.273441	0.052	0.293	2.22336e-43	aNSC	CPT1C
7.47113e-48	0.301712	0.047	0.283	2.50567e-43	aNSC	NBN
1.16591e-47	0.31693	0.074	0.335	3.91023e-43	aNSC	PPP1R10
1.51415e-47	0.510269	0.111	0.405	5.07815e-43	aNSC	EIF5B
1.64853e-47	0.283899	0.069	0.324	5.52883e-43	aNSC	B3GAT2
1.70069e-47	0.506471	0.096	0.378	5.70379e-43	aNSC	USP7
1.72513e-47	0.279174	0.057	0.302	5.78574e-43	aNSC	KIAA0100
1.94475e-47	0.273317	0.051	0.289	6.52232e-43	aNSC	SNRK
2.72703e-47	0.376719	0.096	0.375	9.14592e-43	aNSC	NPM1
3.93737e-47	0.29547	0.064	0.312	1.32051e-42	aNSC	TMF1
4.04898e-47	0.449301	0.076	0.338	1.35795e-42	aNSC	ANXA6
4.53763e-47	0.555066	0.101	0.385	1.52183e-42	aNSC	LONRF2
4.92959e-47	0.325779	0.069	0.322	1.65329e-42	aNSC	PSMD12
5.8232e-47	0.292192	0.062	0.31	1.95298e-42	aNSC	RGMB
6.85175e-47	0.273864	0.06	0.305	2.29794e-42	aNSC	FAT4
6.94933e-47	0.451193	0.061	0.308	2.33066e-42	aNSC	DPP7
7.89196e-47	0.447057	0.087	0.357	2.64681e-42	aNSC	ABCA3
9.09528e-47	0.255897	0.069	0.321	3.05037e-42	aNSC	HSF1
9.71476e-47	0.693515	0.113	0.41	3.25813e-42	aNSC	REEP5
1.10377e-46	0.526437	0.093	0.369	3.70182e-42	aNSC	MTURN
1.29791e-46	0.505419	0.091	0.365	4.35291e-42	aNSC	PCMT1
1.66605e-46	0.508376	0.083	0.348	5.58761e-42	aNSC	SPCS2
1.68381e-46	0.258683	0.047	0.278	5.64717e-42	aNSC	FAM177A1
1.7011e-46	0.535877	0.091	0.363	5.70516e-42	aNSC	IPO7
2.14025e-46	0.394786	0.075	0.332	7.17798e-42	aNSC	LRRC4B
2.14898e-46	0.48924	0.129	0.435	7.20724e-42	aNSC	ESYT2
2.57251e-46	0.566986	0.077	0.337	8.62768e-42	aNSC	PLEC
2.90122e-46	0.372239	0.055	0.294	9.7301e-42	aNSC	PLTP
3.0294e-46	0.519048	0.082	0.345	1.016e-41	aNSC	FLNA
3.07939e-46	0.779491	0.109	0.399	1.03277e-41	aNSC	BCAN
4.05492e-46	0.477829	0.074	0.33	1.35994e-41	aNSC	PURB
4.19346e-46	0.535238	0.093	0.366	1.4064e-41	aNSC	SRSF3
5.10798e-46	0.40617	0.068	0.317	1.71311e-41	aNSC	KIAA0930
6.19233e-46	0.256708	0.049	0.279	2.07678e-41	aNSC	ARF4
7.05547e-46	0.754226	0.107	0.393	2.36626e-41	aNSC	DAG1
7.71222e-46	0.292182	0.071	0.321	2.58652e-41	aNSC	CTTNBP2
9.07311e-46	0.61376	0.085	0.35	3.04294e-41	aNSC	SLK
1.01798e-45	0.322206	0.057	0.296	3.41411e-41	aNSC	PPP1R12C
1.43522e-45	0.53056	0.119	0.414	4.81343e-41	aNSC	OXR1
1.52445e-45	0.864578	0.227	0.645	5.11271e-41	aNSC	FABP5
1.59148e-45	0.517797	0.094	0.366	5.33749e-41	aNSC	NCAN
1.71023e-45	0.344725	0.048	0.276	5.73575e-41	aNSC	RFNG
2.12601e-45	0.315847	0.051	0.282	7.13021e-41	aNSC	DTX3
2.23493e-45	0.509632	0.089	0.355	7.4955e-41	aNSC	LENG8
2.3552e-45	0.425142	0.068	0.315	7.89887e-41	aNSC	SHC2
2.44423e-45	0.441769	0.084	0.345	8.19747e-41	aNSC	PRRC2A
2.59112e-45	0.398924	0.064	0.306	8.6901e-41	aNSC	TMEM248
2.76841e-45	0.494338	0.074	0.327	9.28469e-41	aNSC	PLXNB2
2.90188e-45	0.454978	0.087	0.35	9.73234e-41	aNSC	PRPF6
2.96917e-45	0.50009	0.097	0.37	9.95801e-41	aNSC	G3BP2
4.90752e-45	0.69265	0.14	0.452	1.64588e-40	aNSC	GRB2
5.15471e-45	0.319408	0.049	0.277	1.72879e-40	aNSC	FAM198B
5.27964e-45	0.379251	0.057	0.293	1.77069e-40	aNSC	SKIL
5.50061e-45	0.338069	0.075	0.327	1.84479e-40	aNSC	PNRC1
6.62119e-45	0.615068	0.127	0.428	2.22061e-40	aNSC	PABPC1
6.85704e-45	0.270959	0.049	0.276	2.29971e-40	aNSC	SLC4A8
1.01959e-44	0.408052	0.071	0.318	3.4195e-40	aNSC	EIF3L
1.08827e-44	0.397922	0.101	0.374	3.64984e-40	aNSC	ZFAS1
1.10159e-44	0.340539	0.073	0.321	3.69452e-40	aNSC	EIF3J
1.19138e-44	0.418458	0.073	0.322	3.99565e-40	aNSC	VPS35
1.21169e-44	0.415976	0.073	0.321	4.06376e-40	aNSC	NUMA1
1.26191e-44	0.274921	0.061	0.299	4.2322e-40	aNSC	PMPCB
1.32614e-44	0.396516	0.068	0.312	4.44759e-40	aNSC	UFM1
1.52421e-44	0.38572	0.076	0.328	5.11189e-40	aNSC	POR
1.70078e-44	0.345899	0.081	0.335	5.70407e-40	aNSC	SLIRP
1.92808e-44	0.462629	0.09	0.352	6.4664e-40	aNSC	TPM3
2.06841e-44	0.89685	0.168	0.511	6.93703e-40	aNSC	ZFP36L2
2.12227e-44	0.271477	0.04	0.258	7.11767e-40	aNSC	IPO8
2.19915e-44	0.387116	0.076	0.327	7.37552e-40	aNSC	DNAJC6
2.60148e-44	0.289091	0.052	0.28	8.72486e-40	aNSC	BNIP2
3.00093e-44	0.580214	0.075	0.325	1.00645e-39	aNSC	TTYH3
3.50281e-44	0.264103	0.058	0.291	1.17477e-39	aNSC	ZBTB11
4.75172e-44	0.387625	0.062	0.299	1.59363e-39	aNSC	RLIM
7.63706e-44	0.64614	0.096	0.365	2.56132e-39	aNSC	NDRG2
9.54449e-44	0.322308	0.055	0.284	3.20103e-39	aNSC	TCEAL4
1.22861e-43	0.289685	0.085	0.34	4.1205e-39	aNSC	ZNF385D
1.28711e-43	0.431794	0.059	0.292	4.31672e-39	aNSC	KAT2A
1.28889e-43	0.389626	0.055	0.283	4.32268e-39	aNSC	CD164
1.60116e-43	0.283357	0.054	0.281	5.36998e-39	aNSC	RBM10
1.97454e-43	0.538907	0.083	0.336	6.62223e-39	aNSC	ACSL4
2.0383e-43	0.419677	0.07	0.311	6.83604e-39	aNSC	PIP4K2B
2.06289e-43	0.441072	0.059	0.291	6.91852e-39	aNSC	SCAMP1
2.1227e-43	0.510632	0.075	0.322	7.1191e-39	aNSC	SHISA5
2.19842e-43	0.596271	0.226	0.619	7.37305e-39	aNSC	FGF14
2.55585e-43	0.473297	0.078	0.327	8.57181e-39	aNSC	NCOA7
3.25767e-43	0.277029	0.051	0.274	1.09256e-38	aNSC	AP3M2
3.67098e-43	0.390571	0.056	0.284	1.23117e-38	aNSC	CPNE3
3.99159e-43	0.648207	0.106	0.38	1.3387e-38	aNSC	BRI3
4.0771e-43	0.32072	0.068	0.305	1.36738e-38	aNSC	CTCF
4.19983e-43	0.412593	0.078	0.326	1.40854e-38	aNSC	PRKAR1B
4.9177e-43	0.293603	0.054	0.279	1.6493e-38	aNSC	SSBP4
6.70865e-43	0.522696	0.082	0.332	2.24995e-38	aNSC	RER1
6.87883e-43	0.339549	0.058	0.287	2.30702e-38	aNSC	CTBP1
7.22355e-43	0.439437	0.069	0.308	2.42263e-38	aNSC	B3GAT1
7.91325e-43	1.47308	0.674	0.932	2.65394e-38	aNSC	CLU
8.83784e-43	0.258168	0.042	0.256	2.96403e-38	aNSC	ARMC1
9.14691e-43	0.695546	0.173	0.507	3.06769e-38	aNSC	STXBP1
9.38092e-43	0.314148	0.066	0.301	3.14617e-38	aNSC	ZNF483
1.54999e-42	0.41386	0.061	0.292	5.19836e-38	aNSC	FHL1
1.69697e-42	0.278085	0.048	0.265	5.69129e-38	aNSC	ENOPH1
1.71939e-42	0.32525	0.066	0.3	5.7665e-38	aNSC	SYNCRIP
1.89126e-42	0.326749	0.227	0.606	6.34291e-38	aNSC	DPYD
2.00753e-42	0.278972	0.044	0.259	6.73284e-38	aNSC	FADS1
2.02898e-42	0.31694	0.042	0.255	6.8048e-38	aNSC	INSIG2
2.87281e-42	0.381543	0.044	0.258	9.63482e-38	aNSC	VEGFB
4.19952e-42	0.289934	0.052	0.271	1.40844e-37	aNSC	OTUD5
4.91269e-42	0.343075	0.216	0.584	1.64762e-37	aNSC	GRIA1
5.21608e-42	0.262397	0.046	0.259	1.74937e-37	aNSC	CDKL2
5.36703e-42	0.480276	0.069	0.304	1.79999e-37	aNSC	OS9
5.56054e-42	0.25294	0.048	0.263	1.86489e-37	aNSC	KLF13
5.67527e-42	0.28011	0.059	0.285	1.90337e-37	aNSC	ZNF711
5.97315e-42	0.279932	0.046	0.259	2.00328e-37	aNSC	FKBP3
6.44978e-42	0.388951	0.054	0.275	2.16313e-37	aNSC	MAFG
6.73583e-42	0.42073	0.36	0.923	2.25906e-37	aNSC	APP
7.94099e-42	0.415966	0.053	0.273	2.66325e-37	aNSC	CPNE2
1.03629e-41	0.349536	0.056	0.278	3.47552e-37	aNSC	GRAMD1A
1.72963e-41	0.254314	0.052	0.269	5.80085e-37	aNSC	ATP6V1E1
1.76119e-41	0.680478	0.114	0.389	5.90669e-37	aNSC	HES4
1.88624e-41	0.489123	0.065	0.294	6.32608e-37	aNSC	TRIM47
1.98595e-41	0.260608	0.052	0.269	6.66048e-37	aNSC	SEC16A
2.31215e-41	0.925179	0.229	0.628	7.75448e-37	aNSC	ATP2A2
2.51313e-41	0.296688	0.066	0.294	8.42852e-37	aNSC	HPCAL1
3.06993e-41	0.40835	0.068	0.298	1.02959e-36	aNSC	MYH9
3.30135e-41	0.502289	0.079	0.321	1.10721e-36	aNSC	UBE2V2
6.74433e-41	0.851122	0.139	0.436	2.26191e-36	aNSC	PDIA3
7.19097e-41	0.501515	0.089	0.337	2.41171e-36	aNSC	KIF3C
8.43432e-41	0.341566	0.069	0.298	2.8287e-36	aNSC	SOGA1
8.44787e-41	0.258217	0.043	0.251	2.83325e-36	aNSC	TNK2
9.49529e-41	0.343279	0.072	0.305	3.18453e-36	aNSC	HECW2
1.04694e-40	0.56371	0.102	0.362	3.51122e-36	aNSC	PTGDS
1.15579e-40	0.424275	0.096	0.35	3.87628e-36	aNSC	GNG2
1.3112e-40	0.301994	0.05	0.262	4.39749e-36	aNSC	IFNGR1
1.95156e-40	0.289025	0.05	0.261	6.54514e-36	aNSC	UHMK1
2.41893e-40	0.419071	0.09	0.337	8.11262e-36	aNSC	ADGRL1
2.60585e-40	0.399813	0.092	0.341	8.73951e-36	aNSC	YTHDF2
2.74443e-40	0.353277	0.058	0.277	9.20427e-36	aNSC	FAM126A
3.23161e-40	0.871251	0.282	0.743	1.08382e-35	aNSC	AQP4
3.30494e-40	0.339184	0.049	0.259	1.10841e-35	aNSC	DDIT3
3.63861e-40	0.444638	0.084	0.325	1.22032e-35	aNSC	ANKH
3.73161e-40	0.251262	0.047	0.254	1.25151e-35	aNSC	BTBD2
3.85105e-40	0.270728	0.046	0.252	1.29157e-35	aNSC	GNL1
5.22109e-40	0.669653	0.124	0.402	1.75105e-35	aNSC	CCT4
5.33379e-40	2.60193	0.372	0.255	1.78885e-35	aNSC	MT-CYB
6.16451e-40	0.469427	0.076	0.309	2.06745e-35	aNSC	ACAP3
7.04478e-40	0.460609	0.059	0.278	2.36268e-35	aNSC	BACE1
1.32755e-39	0.31829	0.056	0.27	4.45234e-35	aNSC	KIAA1549
1.53575e-39	0.303456	0.068	0.292	5.15059e-35	aNSC	NOL7
1.55093e-39	0.448559	0.092	0.337	5.20152e-35	aNSC	ZCCHC17
1.84178e-39	0.46991	0.094	0.342	6.17695e-35	aNSC	CEBPZ
2.11429e-39	0.748856	0.099	0.351	7.09089e-35	aNSC	RABL6
2.74626e-39	0.309799	0.055	0.267	9.21042e-35	aNSC	GADD45A
2.78944e-39	0.321689	0.049	0.255	9.35524e-35	aNSC	RIPOR1
2.93156e-39	0.494078	0.073	0.301	9.83188e-35	aNSC	PKN1
3.53996e-39	0.413096	0.056	0.269	1.18723e-34	aNSC	TECR
3.65698e-39	0.384392	0.062	0.281	1.22648e-34	aNSC	WIPI2
4.27099e-39	0.463134	0.1	0.351	1.43241e-34	aNSC	WDR45B
4.70746e-39	0.336803	0.049	0.254	1.57879e-34	aNSC	SPNS1
4.98325e-39	0.320256	0.067	0.287	1.67128e-34	aNSC	EIF2S1
5.06154e-39	0.342046	0.067	0.288	1.69754e-34	aNSC	TMCO1
5.10009e-39	0.293501	0.051	0.258	1.71047e-34	aNSC	CSNK1G2
5.45435e-39	0.321699	0.058	0.272	1.82928e-34	aNSC	RNF40
5.71655e-39	0.370789	0.058	0.272	1.91721e-34	aNSC	TMEM167A
6.9626e-39	0.608198	0.092	0.336	2.33512e-34	aNSC	EIF2S2
8.13801e-39	0.278997	0.05	0.255	2.72933e-34	aNSC	LMBRD2
8.19076e-39	0.351187	0.052	0.259	2.74702e-34	aNSC	PLEKHO1
9.01311e-39	0.569025	0.088	0.327	3.02282e-34	aNSC	SUPT16H
9.1387e-39	0.725716	0.108	0.367	3.06494e-34	aNSC	PURA
9.90636e-39	0.290394	0.081	0.312	3.32239e-34	aNSC	SLIT1
1.41438e-38	0.348678	0.049	0.252	4.74355e-34	aNSC	ACBD5
1.46732e-38	0.297226	0.055	0.264	4.92111e-34	aNSC	PSMD13
1.59958e-38	0.359302	0.092	0.333	5.36466e-34	aNSC	MACO1
1.75421e-38	0.312091	0.052	0.258	5.88328e-34	aNSC	PCNT
2.0162e-38	0.464557	0.072	0.296	6.76194e-34	aNSC	RPL7L1
2.1125e-38	0.257017	0.064	0.279	7.08489e-34	aNSC	ST6GAL1
2.29732e-38	0.383937	0.053	0.26	7.70476e-34	aNSC	DNAJC8
2.48907e-38	0.565676	0.096	0.341	8.34785e-34	aNSC	MDH1
2.64535e-38	0.435345	0.082	0.313	8.87198e-34	aNSC	SRP72
3.22864e-38	0.71639	0.107	0.362	1.08282e-33	aNSC	PRKAR1A
3.36867e-38	0.328218	0.051	0.255	1.12978e-33	aNSC	TOMM70
4.12621e-38	0.547389	0.083	0.315	1.38385e-33	aNSC	APOO
4.76686e-38	0.466055	0.146	0.434	1.59871e-33	aNSC	SLC38A1
5.23251e-38	0.560128	0.103	0.353	1.75488e-33	aNSC	RUNX1T1
5.94816e-38	0.831813	0.118	0.382	1.99489e-33	aNSC	ENO1
7.19926e-38	0.267735	0.056	0.263	2.41449e-33	aNSC	CSE1L
1.009e-37	0.394016	0.104	0.352	3.38397e-33	aNSC	ACVR2A
1.03486e-37	0.497055	0.089	0.325	3.4707e-33	aNSC	COPB2
1.11207e-37	2.76284	0.358	0.243	3.72966e-33	aNSC	MT-ND2
1.29248e-37	0.99448	0.193	0.533	4.33471e-33	aNSC	APLP2
1.36262e-37	0.307146	0.059	0.268	4.56994e-33	aNSC	ARPC3
1.48455e-37	0.478696	0.104	0.352	4.97888e-33	aNSC	PPP2R2C
2.41524e-37	0.512716	0.072	0.292	8.10023e-33	aNSC	LAMTOR1
2.47142e-37	0.52041	0.082	0.31	8.28863e-33	aNSC	EGLN1
2.48434e-37	0.441912	0.066	0.279	8.33199e-33	aNSC	HDAC2
2.71044e-37	0.756392	0.137	0.416	9.09028e-33	aNSC	SCN3A
2.7246e-37	0.475841	0.061	0.272	9.13777e-33	aNSC	ADCYAP1R1
3.09314e-37	0.512254	0.068	0.283	1.03738e-32	aNSC	TOLLIP
3.25544e-37	0.618744	0.087	0.319	1.09181e-32	aNSC	PNMA2
3.66531e-37	0.434935	0.062	0.273	1.22927e-32	aNSC	WDR1
6.41081e-37	0.383631	0.061	0.269	2.15006e-32	aNSC	PAFAH1B2
7.29085e-37	0.497614	0.081	0.306	2.44521e-32	aNSC	ADD2
8.38498e-37	0.584274	0.077	0.3	2.81215e-32	aNSC	NUDT3
9.09975e-37	0.584836	0.165	0.464	3.05187e-32	aNSC	SERPINE2
1.02548e-36	0.55872	0.156	0.447	3.43924e-32	aNSC	GLUL
1.36166e-36	0.419502	0.057	0.26	4.56675e-32	aNSC	RALBP1
1.72455e-36	0.926903	0.126	0.393	5.78379e-32	aNSC	PDIA6
2.20633e-36	0.757629	0.092	0.326	7.3996e-32	aNSC	SSR1
2.38199e-36	0.338066	0.052	0.25	7.9887e-32	aNSC	LAPTM4B
2.48003e-36	0.617334	0.178	0.491	8.31753e-32	aNSC	DAB1
2.51383e-36	0.276947	0.053	0.251	8.43087e-32	aNSC	PTS
2.75894e-36	0.456685	0.135	0.406	9.25294e-32	aNSC	ID2
3.46074e-36	0.419765	0.083	0.306	1.16066e-31	aNSC	DPYSL5
4.03017e-36	0.961646	0.165	0.468	1.35164e-31	aNSC	JUN
4.21824e-36	0.66811	0.101	0.341	1.41471e-31	aNSC	USP11
5.09585e-36	0.42658	0.054	0.253	1.70905e-31	aNSC	ERLIN2
5.62677e-36	0.529009	0.128	0.388	1.88711e-31	aNSC	HMGCS1
5.62805e-36	0.618944	0.092	0.325	1.88754e-31	aNSC	ASAH1
6.73233e-36	0.578605	0.109	0.355	2.25789e-31	aNSC	SLC38A2
7.34483e-36	0.347296	0.07	0.281	2.46331e-31	aNSC	THRB
7.92321e-36	0.712431	0.092	0.325	2.65729e-31	aNSC	SOX9
8.42943e-36	0.486609	0.071	0.283	2.82706e-31	aNSC	PTBP3
8.55623e-36	0.770633	0.138	0.411	2.86959e-31	aNSC	EIF4A2
1.96141e-35	0.383595	0.055	0.252	6.57817e-31	aNSC	GRSF1
2.32219e-35	1.11505	0.174	0.484	7.78817e-31	aNSC	ITM2C
2.40064e-35	0.438771	0.082	0.3	8.05126e-31	aNSC	MSMO1
2.6446e-35	0.585336	0.114	0.362	8.86946e-31	aNSC	HSPA4
2.86481e-35	0.307602	0.058	0.256	9.60801e-31	aNSC	TOPBP1
3.03126e-35	0.584323	0.1	0.334	1.01662e-30	aNSC	RAB14
3.14285e-35	0.372246	0.07	0.279	1.05405e-30	aNSC	SNRPD3
3.28348e-35	0.326219	0.056	0.253	1.10121e-30	aNSC	TRAM1
3.33899e-35	0.625768	0.081	0.299	1.11983e-30	aNSC	TCAF1
3.4386e-35	0.603725	0.081	0.299	1.15324e-30	aNSC	LRPAP1
4.94747e-35	0.526818	0.071	0.28	1.65928e-30	aNSC	AKIRIN1
5.26041e-35	0.485107	0.071	0.28	1.76424e-30	aNSC	SELENOT
5.47761e-35	0.300456	0.069	0.276	1.83708e-30	aNSC	RIMBP2
6.1644e-35	0.534292	0.071	0.28	2.06742e-30	aNSC	AP1B1
6.27464e-35	0.411526	0.068	0.274	2.10439e-30	aNSC	TPM4
7.59861e-35	0.886669	0.129	0.392	2.54842e-30	aNSC	SPOCK2
7.71853e-35	0.871429	0.111	0.356	2.58864e-30	aNSC	TMEM132A
8.12697e-35	0.538084	0.182	0.488	2.72562e-30	aNSC	EPHA5
8.84497e-35	0.469928	0.068	0.273	2.96643e-30	aNSC	TRIM23
8.85898e-35	0.344356	0.082	0.298	2.97113e-30	aNSC	GNAL
1.00463e-34	0.784735	0.101	0.336	3.36932e-30	aNSC	ENO2
1.13869e-34	0.523138	0.079	0.295	3.81893e-30	aNSC	KIF3B
1.19849e-34	0.563651	0.089	0.312	4.01948e-30	aNSC	CCT2
1.30413e-34	0.320674	0.056	0.251	4.3738e-30	aNSC	PPFIBP1
1.32745e-34	0.496242	0.061	0.261	4.45201e-30	aNSC	FYTTD1
1.4342e-34	2.41012	0.328	0.216	4.81003e-30	aNSC	MT-ND1
1.51126e-34	0.612723	0.103	0.338	5.06847e-30	aNSC	RHOA
1.56812e-34	0.370019	0.056	0.25	5.25916e-30	aNSC	ERP29
1.57022e-34	0.422394	0.073	0.281	5.26622e-30	aNSC	CNBP
1.85266e-34	0.697536	0.073	0.282	6.21344e-30	aNSC	LRP10
1.87858e-34	0.492453	0.087	0.307	6.30038e-30	aNSC	TAF7
2.38056e-34	0.266335	0.07	0.274	7.98392e-30	aNSC	PPP1R13B
2.39347e-34	0.596346	0.264	0.656	8.02722e-30	aNSC	H3F3B
3.47554e-34	0.722094	0.105	0.341	1.16563e-29	aNSC	ATP6V1B2
3.58406e-34	0.633717	0.128	0.384	1.20202e-29	aNSC	FLRT2
4.02051e-34	0.332443	0.061	0.258	1.3484e-29	aNSC	DDX21
4.18659e-34	0.675429	0.085	0.303	1.4041e-29	aNSC	MSL1
4.53966e-34	0.504068	0.074	0.282	1.52251e-29	aNSC	EFNB2
5.1865e-34	0.402093	0.057	0.25	1.73945e-29	aNSC	SYNGR1
7.93331e-34	0.589433	0.081	0.293	2.66067e-29	aNSC	RAP2A
1.06222e-33	0.83923	0.11	0.349	3.56248e-29	aNSC	NFE2L1
1.24796e-33	0.382127	0.115	0.356	4.1854e-29	aNSC	MTSS1
1.40741e-33	0.470142	0.101	0.329	4.72019e-29	aNSC	NRP1
1.44285e-33	0.457614	0.068	0.268	4.83902e-29	aNSC	HTRA1
1.45775e-33	2.63744	0.379	0.287	4.88902e-29	aNSC	MT-ND4
1.62971e-33	0.773218	0.127	0.381	5.46571e-29	aNSC	CCT3
1.89906e-33	0.657806	0.1	0.327	6.36906e-29	aNSC	MTPN
2.68101e-33	0.748611	0.122	0.369	8.99159e-29	aNSC	GRIA3
3.54539e-33	0.670603	0.105	0.336	1.18905e-28	aNSC	XRCC6
4.84589e-33	0.402717	0.064	0.258	1.62522e-28	aNSC	ERGIC3
4.85743e-33	0.518584	0.081	0.29	1.62908e-28	aNSC	APBB1
5.71931e-33	0.488209	0.081	0.289	1.91814e-28	aNSC	DYNLRB1
5.9875e-33	0.472263	0.064	0.258	2.00809e-28	aNSC	TBCB
6.42678e-33	2.45114	0.312	0.201	2.15542e-28	aNSC	MT-ND5
6.67936e-33	0.77691	0.172	0.463	2.24012e-28	aNSC	ELAVL3
7.14113e-33	0.842698	0.109	0.343	2.39499e-28	aNSC	MIDN
9.1675e-33	0.264004	0.074	0.275	3.07459e-28	aNSC	BRINP1
9.24018e-33	0.937173	0.247	0.617	3.09897e-28	aNSC	YWHAZ
1.20621e-32	1.0543	0.151	0.426	4.0454e-28	aNSC	GJA1
1.29948e-32	0.668587	0.074	0.276	4.35818e-28	aNSC	RNH1
1.33272e-32	0.640817	0.092	0.31	4.46966e-28	aNSC	SEC61A1
1.51808e-32	0.48921	0.062	0.254	5.09133e-28	aNSC	MEGF8
1.5778e-32	0.608613	0.074	0.276	5.29164e-28	aNSC	REEP2
2.07565e-32	0.776259	0.133	0.387	6.96132e-28	aNSC	BEX3
2.46602e-32	0.597516	0.064	0.255	8.27054e-28	aNSC	CYHR1
3.02964e-32	1.19337	0.185	0.493	1.01608e-27	aNSC	FAM107A
3.05443e-32	0.391824	0.087	0.298	1.02439e-27	aNSC	PRKAR2B
3.09151e-32	0.386979	0.064	0.255	1.03683e-27	aNSC	SURF4
3.4016e-32	0.612071	0.092	0.308	1.14083e-27	aNSC	KCNQ2
4.72208e-32	0.573013	0.069	0.264	1.58369e-27	aNSC	TMEM106B
5.73158e-32	2.64727	0.395	0.319	1.92226e-27	aNSC	MT-CO3
6.12619e-32	0.627596	0.075	0.276	2.0546e-27	aNSC	LASP1
6.7032e-32	0.826012	0.112	0.345	2.24812e-27	aNSC	P4HB
1.0351e-31	0.655094	0.088	0.298	3.47153e-27	aNSC	RAB6B
1.06604e-31	0.586285	0.102	0.323	3.57528e-27	aNSC	GRK3
1.1349e-31	0.889042	0.16	0.435	3.80624e-27	aNSC	MTCH1
1.78042e-31	0.466728	0.07	0.263	5.97117e-27	aNSC	GUCY1A2
1.91276e-31	0.790354	0.159	0.431	6.415e-27	aNSC	YY1
1.91798e-31	0.464164	0.083	0.286	6.43254e-27	aNSC	PSMB1
2.08676e-31	0.573981	0.083	0.287	6.99858e-27	aNSC	GNAI2
2.10781e-31	0.392653	0.19	0.481	7.06916e-27	aNSC	PTPRN2
2.3111e-31	0.917188	0.138	0.392	7.75095e-27	aNSC	GDI1
2.70447e-31	0.656756	0.082	0.284	9.07024e-27	aNSC	POU3F3
3.04116e-31	0.575266	0.111	0.338	1.01994e-26	aNSC	NUDC
3.87526e-31	0.772783	0.127	0.369	1.29969e-26	aNSC	CAMK2B
4.74312e-31	0.867081	0.156	0.425	1.59075e-26	aNSC	PCDH17
7.19972e-31	0.502771	0.069	0.258	2.41464e-26	aNSC	CBX3
9.1103e-31	0.666425	0.083	0.285	3.05541e-26	aNSC	ATP5F1A
2.34056e-30	0.525475	0.075	0.268	7.84977e-26	aNSC	PTOV1
2.97523e-30	0.541386	0.072	0.262	9.97833e-26	aNSC	EXTL3
4.59772e-30	0.992483	0.171	0.451	1.54198e-25	aNSC	PKM
4.72315e-30	0.457022	0.071	0.259	1.58405e-25	aNSC	MRPL20
5.01631e-30	0.624477	0.084	0.283	1.68237e-25	aNSC	PPIB
7.75039e-30	0.799164	0.097	0.308	2.59933e-25	aNSC	WDR82
9.33448e-30	0.724207	0.111	0.332	3.1306e-25	aNSC	NR2F2
9.73281e-30	0.34946	0.085	0.282	3.26419e-25	aNSC	DOCK10
1.05354e-29	0.535831	0.075	0.265	3.53336e-25	aNSC	H2AFV
1.0591e-29	0.803535	0.089	0.292	3.55201e-25	aNSC	AGT
1.26661e-29	0.68868	0.112	0.334	4.24797e-25	aNSC	SUB1
1.39217e-29	0.611392	0.081	0.275	4.66907e-25	aNSC	SDCBP
1.56782e-29	0.521711	0.082	0.276	5.25815e-25	aNSC	EIF4H
1.68945e-29	0.732816	0.094	0.3	5.66608e-25	aNSC	PCDH10
1.74235e-29	0.513102	0.075	0.265	5.8435e-25	aNSC	ARL6IP4
2.50723e-29	0.581723	0.092	0.295	8.40875e-25	aNSC	EDF1
3.29869e-29	0.663762	0.087	0.285	1.10631e-24	aNSC	SRP9
3.38828e-29	0.578749	0.077	0.268	1.13636e-24	aNSC	SSB
3.44356e-29	0.757594	0.104	0.317	1.1549e-24	aNSC	SEPT3
3.87686e-29	0.306511	0.104	0.313	1.30022e-24	aNSC	SHISA9
3.91939e-29	0.449631	0.076	0.265	1.31448e-24	aNSC	STIP1
3.98279e-29	0.522242	0.071	0.255	1.33575e-24	aNSC	SQLE
4.47107e-29	0.745045	0.102	0.312	1.49951e-24	aNSC	SHTN1
5.08668e-29	0.537273	0.256	0.604	1.70597e-24	aNSC	PDE4D
5.22377e-29	0.627242	0.079	0.271	1.75195e-24	aNSC	MLLT1
5.83679e-29	2.5097	0.35	0.262	1.95754e-24	aNSC	MT-CO2
7.78872e-29	0.479582	0.099	0.303	2.61218e-24	aNSC	AGAP3
8.36567e-29	0.550475	0.082	0.273	2.80568e-24	aNSC	CCT8
1.07919e-28	2.46955	0.359	0.276	3.61939e-24	aNSC	MT-ATP6
1.08225e-28	0.760418	0.118	0.34	3.62964e-24	aNSC	SMC3
1.2313e-28	0.55841	0.075	0.261	4.12954e-24	aNSC	MYL6B
1.38857e-28	0.967433	0.175	0.451	4.65698e-24	aNSC	ZFAND5
1.74348e-28	0.588531	0.09	0.287	5.84729e-24	aNSC	STRAP
1.95797e-28	0.740892	0.119	0.34	6.56664e-24	aNSC	SERBP1
2.15127e-28	0.747758	0.121	0.344	7.21493e-24	aNSC	HNRNPA1
2.73062e-28	0.581524	0.072	0.254	9.15795e-24	aNSC	CSTB
3.88102e-28	0.862263	0.115	0.334	1.30162e-23	aNSC	RAD21
3.90635e-28	0.985592	0.128	0.359	1.31011e-23	aNSC	ARL6IP5
6.36056e-28	0.687549	0.13	0.358	2.13321e-23	aNSC	KIAA1217
1.20122e-27	0.754168	0.215	0.521	4.02865e-23	aNSC	CSMD3
1.36928e-27	0.508222	0.078	0.262	4.59229e-23	aNSC	DGKZ
1.95205e-27	1.316	0.269	0.651	6.54678e-23	aNSC	CANX
2.63933e-27	0.413307	0.078	0.261	8.85178e-23	aNSC	MAP1LC3B
2.69409e-27	0.509922	0.089	0.279	9.03543e-23	aNSC	FRMD4B
3.01317e-27	1.00166	0.229	0.552	1.01056e-22	aNSC	HSPD1
3.02003e-27	0.524147	0.251	0.585	1.01286e-22	aNSC	MACROD2
3.19984e-27	0.518837	0.078	0.26	1.07316e-22	aNSC	SGTA
4.2949e-27	0.552413	0.093	0.286	1.44042e-22	aNSC	EPB41L1
4.41788e-27	0.50271	0.082	0.266	1.48167e-22	aNSC	EIF3F
6.99908e-27	0.346585	0.084	0.267	2.34735e-22	aNSC	PDE10A
7.84754e-27	0.585231	0.085	0.27	2.63191e-22	aNSC	LDHB
8.8883e-27	0.583347	0.085	0.269	2.98096e-22	aNSC	REEP1
1.50627e-26	1.08692	0.202	0.496	5.05174e-22	aNSC	SELENOW
1.56038e-26	0.867335	0.161	0.412	5.2332e-22	aNSC	NRXN2
2.0852e-26	0.471135	0.107	0.306	6.99334e-22	aNSC	UNC79
2.45186e-26	0.666063	0.104	0.303	8.22305e-22	aNSC	ARF1
2.56914e-26	0.726437	0.077	0.255	8.61638e-22	aNSC	IMPAD1
2.579e-26	0.774753	0.101	0.298	8.64945e-22	aNSC	DKK3
3.89354e-26	0.488417	0.093	0.282	1.30582e-21	aNSC	PEX5L
4.43828e-26	0.79572	0.089	0.275	1.48851e-21	aNSC	TMEM158
5.32079e-26	0.662141	0.081	0.259	1.78449e-21	aNSC	NELFB
6.43534e-26	0.871901	0.12	0.331	2.15828e-21	aNSC	TMEM30A
7.20485e-26	0.535455	0.081	0.258	2.41636e-21	aNSC	TM2D3
9.14046e-26	0.672879	0.086	0.267	3.06553e-21	aNSC	NDRG4
9.87112e-26	0.550723	0.139	0.36	3.31058e-21	aNSC	TERF2IP
1.30141e-25	0.719036	0.102	0.295	4.36467e-21	aNSC	ST6GAL2
1.3247e-25	0.730276	0.095	0.284	4.44276e-21	aNSC	SERINC3
1.35964e-25	0.528206	0.077	0.251	4.55997e-21	aNSC	HERPUD1
1.79738e-25	0.827348	0.108	0.307	6.02806e-21	aNSC	TKT
2.18252e-25	0.263843	0.104	0.293	7.31975e-21	aNSC	SEZ6L
2.67882e-25	0.879836	0.142	0.369	8.98423e-21	aNSC	PFDN5
2.99757e-25	0.972281	0.363	0.81	1.00533e-20	aNSC	SQSTM1
3.08304e-25	0.445569	0.084	0.26	1.03399e-20	aNSC	TIAM1
3.34193e-25	0.396326	0.082	0.256	1.12082e-20	aNSC	GAS7
3.55789e-25	1.84736	0.411	0.342	1.19325e-20	aNSC	STMN2
4.6059e-25	0.819042	0.122	0.331	1.54473e-20	aNSC	SF3B2
4.71033e-25	0.424206	0.266	0.589	1.57975e-20	aNSC	GAP43
5.3517e-25	0.772488	0.089	0.27	1.79485e-20	aNSC	RHOB
1.14923e-24	0.426584	0.367	0.81	3.8543e-20	aNSC	FRMD4A
2.067e-24	0.819082	0.084	0.258	6.93232e-20	aNSC	NAT8L
2.16614e-24	0.357569	0.155	0.376	7.26481e-20	aNSC	ADGRL2
2.33063e-24	0.738178	0.118	0.318	7.81647e-20	aNSC	RNF11
2.59138e-24	0.778635	0.093	0.274	8.69097e-20	aNSC	WSB2
2.97285e-24	0.597942	0.086	0.259	9.97036e-20	aNSC	TRIR
3.07822e-24	0.580755	0.093	0.273	1.03237e-19	aNSC	ZNF428
3.67791e-24	0.631732	0.16	0.393	1.2335e-19	aNSC	PAK3
3.90499e-24	1.01481	0.156	0.39	1.30966e-19	aNSC	B2M
6.36503e-24	0.592251	0.141	0.357	2.1347e-19	aNSC	CACNA1E
9.38096e-24	0.982333	0.174	0.422	3.14619e-19	aNSC	CKB
1.1497e-23	1.07148	0.135	0.348	3.85587e-19	aNSC	SDC3
1.86631e-23	0.448133	0.099	0.278	6.25924e-19	aNSC	PTPRT
3.24641e-23	0.805038	0.124	0.325	1.08878e-18	aNSC	NDUFB2
3.29626e-23	0.820752	0.342	0.783	1.1055e-18	aNSC	RTN3
7.74328e-23	0.688386	0.084	0.25	2.59694e-18	aNSC	NARS
8.8179e-23	0.845283	0.094	0.268	2.95735e-18	aNSC	TGOLN2
9.22925e-23	0.697654	0.158	0.378	3.09531e-18	aNSC	KHDRBS3
1.02025e-22	1.08739	0.204	0.478	3.4217e-18	aNSC	RACK1
1.08039e-22	0.677494	0.212	0.482	3.6234e-18	aNSC	FAM19A2
2.17124e-22	0.615915	0.161	0.386	7.28191e-18	aNSC	PDE1A
2.39367e-22	0.771258	0.211	0.479	8.02788e-18	aNSC	UBC
2.54843e-22	0.853525	0.121	0.314	8.54692e-18	aNSC	ATP5MC2
2.88786e-22	0.716811	0.095	0.268	9.68531e-18	aNSC	STARD7
2.9718e-22	0.706797	0.125	0.32	9.96681e-18	aNSC	ERC2
3.48862e-22	0.956028	0.156	0.378	1.17001e-17	aNSC	EIF4G2
3.49901e-22	0.753452	0.096	0.269	1.1735e-17	aNSC	HMGCR
3.59627e-22	0.559276	0.099	0.271	1.20612e-17	aNSC	HSPA1B
3.70397e-22	0.715567	0.115	0.303	1.24224e-17	aNSC	PTPRO
4.47355e-22	0.883016	0.121	0.312	1.50034e-17	aNSC	ARPP19
4.60912e-22	1.18706	0.206	0.478	1.54581e-17	aNSC	CST3
8.03033e-22	1.77698	0.528	0.643	2.69321e-17	aNSC	CNTNAP2
1.09971e-21	0.804986	0.091	0.258	3.68821e-17	aNSC	NSMF
1.10662e-21	0.763164	0.094	0.263	3.71139e-17	aNSC	ATXN7L3B
1.31536e-21	0.682572	0.099	0.27	4.41147e-17	aNSC	TXN
5.46341e-21	0.70691	0.108	0.283	1.83232e-16	aNSC	SCAMP5
8.20624e-21	0.715151	0.092	0.255	2.75221e-16	aNSC	CADM3
4.78575e-20	0.903268	0.113	0.289	1.60505e-15	aNSC	SLC22A17
5.02346e-20	1.07463	0.13	0.32	1.68477e-15	aNSC	IRF2BP2
5.26825e-20	1.32309	0.254	0.57	1.76687e-15	aNSC	KIF1A
1.31646e-19	0.842949	0.13	0.316	4.41513e-15	aNSC	TMA7
1.7063e-19	1.01698	0.133	0.323	5.72259e-15	aNSC	BSG
3.1925e-19	0.968101	0.165	0.378	1.0707e-14	aNSC	LMO4
4.68379e-19	0.97179	0.111	0.28	1.57085e-14	aNSC	EIF4G1
6.75407e-19	0.802313	0.146	0.341	2.26518e-14	aNSC	RPL31
8.29773e-19	0.873968	0.118	0.289	2.78289e-14	aNSC	VDAC1
1.05824e-18	0.959232	0.168	0.381	3.54912e-14	aNSC	DYNLL1
1.18611e-18	0.785358	0.105	0.266	3.97797e-14	aNSC	EIF1AX
1.77835e-18	1.95094	0.531	0.695	5.96422e-14	aNSC	RPL13
2.76648e-18	1.35541	0.228	0.502	9.27822e-14	aNSC	TMBIM6
3.4845e-18	0.592699	0.132	0.309	1.16863e-13	aNSC	LRFN5
3.60275e-18	0.866744	0.11	0.273	1.20829e-13	aNSC	ATP1A1
4.09553e-18	0.711667	0.111	0.273	1.37356e-13	aNSC	TCP1
4.31448e-18	1.07526	0.173	0.386	1.44699e-13	aNSC	RAC1
7.07333e-18	0.919384	0.128	0.303	2.37225e-13	aNSC	PPP2R1A
8.62558e-18	0.623051	0.133	0.309	2.89285e-13	aNSC	SLIT2
9.51308e-18	0.667201	0.1	0.251	3.1905e-13	aNSC	RPL22
1.46718e-17	1.07532	0.254	0.546	4.92063e-13	aNSC	EIF1
1.95435e-17	0.866463	0.183	0.4	6.55451e-13	aNSC	PCDH7
2.05477e-17	0.966341	0.16	0.357	6.89129e-13	aNSC	RPL12
2.14004e-17	0.788793	0.4	0.891	7.17728e-13	aNSC	RTN4
2.42513e-17	0.884236	0.113	0.273	8.13339e-13	aNSC	THRA
5.40798e-17	0.952012	0.185	0.403	1.81373e-12	aNSC	YBX1
5.58654e-17	0.472624	0.118	0.275	1.87361e-12	aNSC	CALN1
8.33066e-17	1.06563	0.127	0.296	2.79394e-12	aNSC	CBX6
9.40051e-17	0.342272	0.107	0.255	3.15274e-12	aNSC	NMNAT2
1.00987e-16	1.33681	0.213	0.461	3.38689e-12	aNSC	CALR
1.04617e-16	0.769149	0.117	0.275	3.50865e-12	aNSC	PTP4A1
1.5535e-16	0.920202	0.131	0.301	5.21013e-12	aNSC	ATF4
2.01218e-16	1.09551	0.218	0.464	6.74845e-12	aNSC	RPL5
2.15417e-16	1.12634	0.147	0.33	7.22465e-12	aNSC	SERF2
3.01823e-16	1.99328	0.454	0.52	1.01226e-11	aNSC	HSP90AB1
3.57881e-16	0.912368	0.117	0.273	1.20026e-11	aNSC	ATP5MD
3.6106e-16	0.867962	0.272	0.563	1.21092e-11	aNSC	CCSER1
4.82575e-16	0.871501	0.11	0.261	1.61846e-11	aNSC	LINGO1
5.91811e-16	2.00245	0.443	0.494	1.98482e-11	aNSC	SYT1
7.42682e-16	0.71647	0.108	0.255	2.49081e-11	aNSC	COX6C
7.9471e-16	0.774882	0.176	0.374	2.6653e-11	aNSC	SNAP25
9.10711e-16	2.05811	0.475	0.575	3.05434e-11	aNSC	RPS2
9.54887e-16	0.803043	0.176	0.373	3.2025e-11	aNSC	IQCJ-SCHIP1
9.96484e-16	0.814129	0.126	0.286	3.34201e-11	aNSC	ATP5MG
1.45397e-15	0.611187	0.156	0.332	4.87631e-11	aNSC	DSCAM
1.58141e-15	1.05204	0.169	0.364	5.30373e-11	aNSC	MYL6
1.60109e-15	0.738136	0.108	0.253	5.36973e-11	aNSC	GRM7
2.10053e-15	0.833503	0.111	0.258	7.04477e-11	aNSC	ZBTB18
2.32254e-15	0.996825	0.139	0.307	7.78935e-11	aNSC	MZT2B
2.43675e-15	0.984318	0.168	0.36	8.17238e-11	aNSC	SKP1
3.98069e-15	0.81314	0.118	0.267	1.33504e-10	aNSC	DDX24
4.07383e-15	0.989219	0.133	0.295	1.36628e-10	aNSC	TOMM20
4.28057e-15	1.25036	0.248	0.518	1.43562e-10	aNSC	MT3
5.67554e-15	1.17263	0.199	0.417	1.90346e-10	aNSC	MT2A
6.92771e-15	0.490199	0.128	0.281	2.32342e-10	aNSC	LINC01122
8.75961e-15	0.752662	0.128	0.283	2.9378e-10	aNSC	LINGO2
1.21307e-14	1.02807	0.127	0.282	4.06841e-10	aNSC	PEA15
1.22127e-14	0.988937	0.176	0.369	4.09591e-10	aNSC	RPS20
1.37204e-14	0.721771	0.136	0.294	4.60154e-10	aNSC	RALYL
1.74629e-14	0.833262	0.124	0.275	5.8567e-10	aNSC	ELOB
1.93874e-14	0.794415	0.218	0.443	6.50215e-10	aNSC	IL1RAPL1
1.94129e-14	1.28881	0.234	0.486	6.51069e-10	aNSC	ITM2B
2.04186e-14	1.44081	0.567	0.808	6.84799e-10	aNSC	FTH1
2.14314e-14	0.942712	0.148	0.317	7.18768e-10	aNSC	RIMS1
3.53715e-14	1.40745	0.282	0.591	1.18629e-09	aNSC	CD63
3.6625e-14	1.13358	0.207	0.425	1.22833e-09	aNSC	RPL14
3.78124e-14	0.591334	0.18	0.364	1.26815e-09	aNSC	GABRB3
3.96443e-14	0.904063	0.124	0.272	1.32959e-09	aNSC	DSTN
4.15068e-14	0.926476	0.132	0.287	1.39206e-09	aNSC	UQCRH
4.16056e-14	1.08435	0.561	0.704	1.39537e-09	aNSC	RBFOX1
4.35435e-14	1.30577	0.236	0.484	1.46036e-09	aNSC	SARAF
4.47196e-14	1.01425	0.229	0.465	1.49981e-09	aNSC	NACA
6.35113e-14	0.612504	0.192	0.384	2.13004e-09	aNSC	CNTN5
7.23587e-14	0.980755	0.19	0.389	2.42677e-09	aNSC	RPL30
1.10741e-13	0.95792	0.154	0.322	3.71404e-09	aNSC	ATP5ME
1.35937e-13	2.26149	0.51	0.716	4.55906e-09	aNSC	APOE
1.73788e-13	1.05612	0.195	0.398	5.8285e-09	aNSC	RPL10A
2.45851e-13	0.858963	0.125	0.269	8.24536e-09	aNSC	SYP
2.70607e-13	0.9048	0.117	0.255	9.07562e-09	aNSC	SET
3.3234e-13	0.770353	0.127	0.271	1.1146e-08	aNSC	STXBP5L
3.43552e-13	1.08112	0.178	0.364	1.15221e-08	aNSC	RPL23
4.14722e-13	1.14342	0.196	0.397	1.39089e-08	aNSC	SPARCL1
8.19924e-13	0.734431	0.129	0.272	2.74986e-08	aNSC	TENM2
2.01812e-12	0.967571	0.159	0.321	6.76838e-08	aNSC	PPIA
2.14337e-12	0.802357	0.153	0.309	7.18845e-08	aNSC	CRYAB
2.98169e-12	0.880434	0.129	0.269	1e-07	aNSC	RPL7
3.87914e-12	1.05036	0.121	0.256	1.30099e-07	aNSC	ATP6AP2
5.28483e-12	0.453958	0.192	0.363	1.77242e-07	aNSC	NRG1
6.18488e-12	0.894655	0.136	0.278	2.07429e-07	aNSC	TENM3
8.52225e-12	0.950719	0.186	0.366	2.85819e-07	aNSC	ARPP21
9.41933e-12	1.00971	0.166	0.327	3.15905e-07	aNSC	DNAJB1
9.64944e-12	1.48979	0.251	0.501	3.23623e-07	aNSC	CD81
1.56715e-11	1.41275	0.131	0.27	5.25592e-07	aNSC	METRN
2.063e-11	1.00353	0.199	0.388	6.91888e-07	aNSC	NELL2
2.38363e-11	1.43678	0.282	0.561	7.99421e-07	aNSC	HSPA5
3.03966e-11	0.951098	0.143	0.286	1.01944e-06	aNSC	MAP1LC3A
4.50301e-11	1.15001	0.271	0.53	1.51022e-06	aNSC	RPL37
5.52926e-11	1.19235	0.22	0.428	1.8544e-06	aNSC	RPS6
6.25089e-11	0.56805	0.156	0.299	2.09642e-06	aNSC	KCNQ3
7.37529e-11	1.09359	0.201	0.389	2.47352e-06	aNSC	RPL23A
7.49907e-11	1.19493	0.194	0.376	2.51504e-06	aNSC	RPL27A
8.84297e-11	0.907953	0.226	0.428	2.96575e-06	aNSC	PCLO
3.43172e-10	1.46185	0.285	0.559	1.15093e-05	aNSC	TUBB2B
4.42363e-10	1.12516	0.371	0.748	1.4836e-05	aNSC	GNAS
4.56845e-10	1.18728	0.19	0.361	1.53217e-05	aNSC	SCN2A
7.19507e-10	1.02501	0.334	0.651	2.41308e-05	aNSC	RTN1
7.40622e-10	1.09168	0.167	0.319	2.4839e-05	aNSC	RPL9
1.21618e-09	1.44891	0.237	0.451	4.07882e-05	aNSC	SERINC1
1.70798e-09	0.930614	0.156	0.292	5.72824e-05	aNSC	NDUFA4
2.33356e-09	1.45517	0.378	0.782	7.8263e-05	aNSC	PSAP
2.43997e-09	1.55435	0.411	0.456	8.18317e-05	aNSC	TMSB10
2.76658e-09	0.908018	0.181	0.335	9.27855e-05	aNSC	GALNTL6
4.51357e-09	1.08229	0.137	0.26	0.000151376	aNSC	UQCR10
6.23136e-09	1.08303	0.144	0.272	0.000208987	aNSC	RPS26
6.87891e-09	1.03923	0.165	0.307	0.000230705	aNSC	TOMM7
8.0139e-09	1.23432	0.255	0.475	0.00026877	aNSC	RPS25
8.34974e-09	1.43632	0.195	0.363	0.000280034	aNSC	NORAD
8.65426e-09	1.34951	0.183	0.34	0.000290247	aNSC	SNHG25
9.51986e-09	1.15529	0.159	0.296	0.000319277	aNSC	GUK1
1.02569e-08	0.749792	0.143	0.264	0.000343996	aNSC	HSPE1
1.075e-08	1.17755	0.256	0.474	0.000360533	aNSC	RPLP2
1.26012e-08	1.33292	0.244	0.451	0.00042262	aNSC	ATP2B1
1.91754e-08	0.729889	0.426	0.85	0.000643105	aNSC	MAP1B
3.22616e-08	0.939964	0.226	0.407	0.00108199	aNSC	CNTN1
3.66448e-08	1.2208	0.21	0.382	0.00122899	aNSC	RPS11
4.36841e-08	0.897518	0.139	0.255	0.00146508	aNSC	SLC2A13
4.91069e-08	1.1662	0.203	0.366	0.00164695	aNSC	YWHAG
7.16115e-08	1.06629	0.185	0.333	0.00240171	aNSC	FGF12
7.43956e-08	1.08852	0.154	0.278	0.00249508	aNSC	TUBB
7.66318e-08	1.28707	0.243	0.439	0.00257008	aNSC	RPS9
8.23506e-08	1.28468	0.288	0.535	0.00276187	aNSC	RPS27
1.38397e-07	1.33119	0.222	0.401	0.00464158	aNSC	RPS3
1.49536e-07	1.37928	0.2	0.359	0.00501513	aNSC	RPS16
1.62392e-07	1.10797	0.146	0.263	0.00544631	aNSC	NLRP1
1.83249e-07	1.26278	0.243	0.432	0.0061458	aNSC	TPT1
2.12284e-07	0.867485	0.209	0.362	0.00711958	aNSC	MDGA2
3.3052e-07	1.19096	0.212	0.375	0.011085	aNSC	RPL35A
3.33711e-07	0.346234	0.151	0.258	0.011192	aNSC	LHFPL3
5.24907e-07	1.27327	0.194	0.342	0.0176043	aNSC	JUND
5.43984e-07	1.06408	0.154	0.27	0.0182441	aNSC	SCG2
6.78089e-07	1.16216	0.166	0.292	0.0227417	aNSC	RPL27
7.11628e-07	1.2142	0.27	0.484	0.0238666	aNSC	RPL6
1.18271e-06	1.27881	0.196	0.34	0.0396656	aNSC	CAMK2N1
1.72158e-06	1.13842	0.169	0.294	0.0577383	aNSC	RPS15A
1.76225e-06	1.19498	0.211	0.364	0.0591024	aNSC	RPS7
2.41992e-06	1.19883	0.183	0.316	0.0811593	aNSC	RPS10
2.75381e-06	0.596394	0.462	0.909	0.0923572	aNSC	CPE
3.02956e-06	1.14339	0.524	0.757	0.101605	aNSC	CSMD1
3.32458e-06	0.99426	0.222	0.378	0.1115	aNSC	OPCML
3.79466e-06	1.39809	0.193	0.332	0.127265	aNSC	PRNP
3.99038e-06	1.10739	0.535	0.794	0.133829	aNSC	ROBO1
4.15212e-06	1.40364	0.174	0.297	0.139254	aNSC	IDS
5.25106e-06	1.14563	0.159	0.271	0.17611	aNSC	CHCHD2
5.67803e-06	1.91832	0.434	0.589	0.19043	aNSC	RPS19
5.79525e-06	1.16742	0.186	0.317	0.194361	aNSC	SRP14
6.41516e-06	1.64208	0.323	0.343	0.215152	aNSC	ATP1B1
6.72681e-06	1.04895	0.179	0.301	0.225604	aNSC	SOX4
7.93799e-06	1.17447	0.156	0.264	0.266224	aNSC	ATP6V0B
8.22303e-06	1.19744	0.195	0.329	0.275784	aNSC	DNAJA1
9.45072e-06	1.40281	0.265	0.462	0.316958	aNSC	RPL21
1.2588e-05	1.1706	0.194	0.325	0.422175	aNSC	COX7C
1.9115e-05	1.80535	0.419	0.549	0.641078	aNSC	TMSB4X
2.30089e-05	1.43387	0.262	0.449	0.771673	aNSC	RPS12
2.97784e-05	1.40265	0.208	0.347	0.99871	aNSC	MARCKS
3.13567e-05	1.36037	0.252	0.429	1	aNSC	RPS23
3.3325e-05	1.21472	0.3	0.521	1	aNSC	RPL19
3.38161e-05	1.13367	0.255	0.43	1	aNSC	RPL24
3.66679e-05	1.20095	0.197	0.325	1	aNSC	HSPB1
4.01935e-05	0.924366	0.562	0.896	1	aNSC	PTPRD
4.10123e-05	1.30641	0.225	0.376	1	aNSC	RPS29
5.69688e-05	1.31359	0.304	0.531	1	aNSC	RPL11
6.93119e-05	1.96858	0.363	0.448	1	aNSC	RPL18
6.93564e-05	1.18672	0.193	0.314	1	aNSC	RPS4X
7.15106e-05	1.33432	0.245	0.408	1	aNSC	MEF2C
9.03175e-05	2.02893	0.378	0.481	1	aNSC	ACTB
0.000129899	1.6204	0.312	0.553	1	aNSC	HSP90B1
0.000138537	1.4691	0.27	0.272	1	aNSC	STMN1
0.000169101	1.39217	0.202	0.328	1	aNSC	RPL29
0.000177751	0.612172	0.439	0.797	1	aNSC	ANKS1B
0.000343771	1.76125	0.441	0.603	1	aNSC	CALM1
0.00036643	1.10973	0.212	0.334	1	aNSC	UBB
0.000379174	1.21902	0.325	0.552	1	aNSC	BASP1
0.000387203	1.52004	0.324	0.566	1	aNSC	RPL10
0.000459483	1.32757	0.258	0.419	1	aNSC	RPL34
0.000462803	0.742155	0.178	0.273	1	aNSC	MYT1L
0.000480332	1.33305	0.23	0.371	1	aNSC	HSPA8
0.00048296	1.53596	0.181	0.288	1	aNSC	CTSB
0.000614589	1.29031	0.203	0.32	1	aNSC	YWHAB
0.00114321	1.31804	0.171	0.264	1	aNSC	TMEM59L
0.00149536	1.16953	0.169	0.26	1	aNSC	CFL1
0.00157184	1.04111	0.269	0.424	1	aNSC	KCNIP4
0.00160409	1.21192	0.237	0.374	1	aNSC	RPL38
0.00171188	1.2376	0.216	0.337	1	aNSC	GRM5
0.00190738	1.24983	0.164	0.25	1	aNSC	CDH12
0.00317703	1.28353	0.181	0.275	1	aNSC	RPS13
0.00334378	1.14586	0.203	0.308	1	aNSC	TUBB2A
0.00377106	1.5301	0.239	0.376	1	aNSC	RPSA
0.0042932	1.4116	0.215	0.332	1	aNSC	RPL15
0.00431171	1.8731	0.467	0.717	1	aNSC	FP236383.1
0.00493324	1.35132	0.176	0.264	1	aNSC	C4orf48
0.00738195	1.40969	0.248	0.385	1	aNSC	RPS3A
0.00746905	1.20589	0.194	0.289	1	aNSC	HINT1
0	2.34448	0.405	0.033	0	Neuroblast	AC004949.1
0	2.25866	0.844	0.271	0	Neuroblast	STMN2
0	2.18567	0.656	0.15	0	Neuroblast	CELF4
0	2.15312	0.842	0.38	0	Neuroblast	PTPRN2
0	2.00401	0.728	0.138	0	Neuroblast	NSG2
0	1.98	0.775	0.178	0	Neuroblast	MYT1L
0	1.97906	0.705	0.144	0	Neuroblast	CACNA1B
0	1.93011	0.779	0.317	0	Neuroblast	PTMA
0	1.91017	0.707	0.16	0	Neuroblast	NMNAT2
0	1.79191	0.753	0.284	0	Neuroblast	SNAP25
0	1.7786	0.648	0.132	0	Neuroblast	SHANK2
0	1.77288	0.742	0.266	0	Neuroblast	TERF2IP
0	1.74043	0.872	0.466	0	Neuroblast	BASP1
0	1.68478	0.457	0.054	0	Neuroblast	NRGN
0	1.66629	0.593	0.126	0	Neuroblast	HECW1
0	1.50706	0.666	0.099	0	Neuroblast	CELF5
0	1.43769	0.607	0.084	0	Neuroblast	SRRM3
0	1.43003	0.576	0.115	0	Neuroblast	SH3GL3
0	1.3347	0.545	0.085	0	Neuroblast	SRRM4
0	1.33058	0.541	0.097	0	Neuroblast	PRKCZ
0	1.32911	0.537	0.101	0	Neuroblast	SYN2
0	1.30916	0.492	0.054	0	Neuroblast	SMPD3
0	1.22954	0.583	0.127	0	Neuroblast	CXADR
0	1.2119	0.418	0.033	0	Neuroblast	MAP7D2
0	1.20094	0.46	0.055	0	Neuroblast	PDE2A
0	1.1726	0.504	0.075	0	Neuroblast	SGSM1
0	1.15604	0.467	0.042	0	Neuroblast	POU2F2
0	1.10898	0.434	0.04	0	Neuroblast	CAMK2A
0	1.10729	0.523	0.082	0	Neuroblast	SEZ6L2
0	1.09382	0.419	0.047	0	Neuroblast	CACNG3
0	1.05371	0.478	0.065	0	Neuroblast	SULT4A1
0	1.03368	0.495	0.071	0	Neuroblast	RNF165
0	1.02317	0.53	0.082	0	Neuroblast	ATCAY
0	0.963389	0.45	0.056	0	Neuroblast	LHFPL4
0	0.960124	0.378	0.023	0	Neuroblast	IQSEC3
0	0.945128	0.463	0.04	0	Neuroblast	INA
0	0.922241	0.367	0.024	0	Neuroblast	SLC6A6
0	0.869251	0.459	0.049	0	Neuroblast	JPH3
0	0.847108	0.348	0.021	0	Neuroblast	CHST8
0	0.845266	0.402	0.034	0	Neuroblast	SLC8A2
0	0.836025	0.401	0.033	0	Neuroblast	NEURL1
0	0.820128	0.405	0.032	0	Neuroblast	SYT5
0	0.813347	0.345	0.025	0	Neuroblast	AJAP1
0	0.777026	0.379	0.025	0	Neuroblast	NEUROD2
0	0.724946	0.336	0.017	0	Neuroblast	MIR7-3HG
0	0.703753	0.361	0.03	0	Neuroblast	FXYD7
0	0.694315	0.355	0.028	0	Neuroblast	SHANK1
0	0.680801	0.301	0.012	0	Neuroblast	PACSIN1
6.79624e-308	0.632441	0.345	0.026	2.27932e-303	Neuroblast	SYT13
7.21755e-308	0.90389	0.364	0.031	2.42062e-303	Neuroblast	IL34
8.78881e-308	0.960156	0.428	0.052	2.94759e-303	Neuroblast	SLC17A7
1.85716e-306	1.83244	0.683	0.205	6.22853e-302	Neuroblast	STMN1
1.21269e-305	0.708855	0.345	0.027	4.06713e-301	Neuroblast	SLC12A5
1.62862e-305	1.73751	0.762	0.278	5.46207e-301	Neuroblast	GRIN2B
9.7834e-304	1.90793	0.864	0.43	3.28116e-299	Neuroblast	ANK3
1.52211e-303	0.668514	0.329	0.023	5.10486e-299	Neuroblast	RIMS4
2.31345e-302	0.843151	0.322	0.021	7.75884e-298	Neuroblast	AC005258.1
4.50673e-300	0.878064	0.503	0.086	1.51147e-295	Neuroblast	CDK5R1
9.00717e-300	1.66356	0.598	0.148	3.02082e-295	Neuroblast	DLGAP2
1.85734e-298	1.18157	0.495	0.082	6.22916e-294	Neuroblast	EEF1A2
1.32218e-297	0.532874	0.292	0.015	4.43432e-293	Neuroblast	MAL2
1.36768e-297	0.898845	0.401	0.046	4.58692e-293	Neuroblast	SVOP
3.38099e-297	0.923947	0.453	0.065	1.13392e-292	Neuroblast	ZFR2
2.81086e-296	0.937153	0.322	0.022	9.42706e-292	Neuroblast	HS3ST2
1.11446e-295	1.96173	0.736	0.277	3.73766e-291	Neuroblast	GABRB3
8.33578e-295	0.991817	0.408	0.049	2.79566e-290	Neuroblast	RBFOX3
3.77036e-294	0.922393	0.428	0.056	1.2645e-289	Neuroblast	SSTR2
7.71436e-294	1.15585	0.576	0.127	2.58724e-289	Neuroblast	SYT4
1.76157e-293	1.13169	0.451	0.068	5.90795e-289	Neuroblast	KSR2
7.97107e-292	1.12182	0.456	0.068	2.67334e-287	Neuroblast	RUNDC3B
1.68978e-291	0.991756	0.418	0.054	5.66719e-287	Neuroblast	RAP1GAP2
3.20168e-291	0.689079	0.347	0.03	1.07378e-286	Neuroblast	BEX5
9.62936e-290	0.607467	0.314	0.022	3.22949e-285	Neuroblast	CABP1
1.80518e-288	0.972688	0.415	0.053	6.05422e-284	Neuroblast	BCL11B
1.27982e-285	0.951941	0.303	0.02	4.29226e-281	Neuroblast	GADD45G
2.16261e-285	1.88835	0.856	0.457	7.25298e-281	Neuroblast	LRRC7
6.03743e-284	0.761853	0.324	0.025	2.02483e-279	Neuroblast	NEFM
6.26313e-284	0.879131	0.377	0.041	2.10053e-279	Neuroblast	TCEAL5
8.41934e-284	0.765838	0.328	0.027	2.82368e-279	Neuroblast	SLC8A3
1.70491e-282	0.578896	0.282	0.015	5.71791e-278	Neuroblast	LBH
2.67731e-281	0.752502	0.346	0.032	8.97916e-277	Neuroblast	NKAIN1
4.17444e-281	1.00316	0.495	0.091	1.40002e-276	Neuroblast	SH3BP5
2.57032e-280	1.17823	0.418	0.057	8.62033e-276	Neuroblast	TTC9B
4.05302e-280	0.917474	0.474	0.081	1.3593e-275	Neuroblast	SCN3B
7.01482e-280	0.55727	0.268	0.013	2.35263e-275	Neuroblast	EPHA10
1.26688e-279	1.15771	0.516	0.104	4.24887e-275	Neuroblast	KCNB1
2.37428e-275	0.68037	0.322	0.026	7.96287e-271	Neuroblast	GABRA5
3.40089e-274	1.10167	0.493	0.091	1.14059e-269	Neuroblast	KCNJ6
6.47025e-273	0.869592	0.466	0.082	2.16999e-268	Neuroblast	PITHD1
1.82821e-268	0.588377	0.307	0.024	6.13145e-264	Neuroblast	DMTN
1.60127e-265	0.675969	0.308	0.025	5.37033e-261	Neuroblast	CELF3
1.77795e-265	0.722922	0.323	0.029	5.96288e-261	Neuroblast	GNG3
2.3455e-265	1.07471	0.537	0.123	7.86633e-261	Neuroblast	JPT1
1.15522e-264	0.621154	0.36	0.04	3.87438e-260	Neuroblast	TMEM130
7.76679e-264	0.631304	0.375	0.045	2.60483e-259	Neuroblast	CHD5
2.01875e-263	0.625954	0.299	0.023	6.77047e-259	Neuroblast	DNAJC12
2.16213e-263	0.772714	0.365	0.042	7.25134e-259	Neuroblast	PMEPA1
2.20696e-263	1.00189	0.316	0.028	7.40169e-259	Neuroblast	NRN1
2.23967e-261	1.85294	0.445	0.074	7.5114e-257	Neuroblast	GABRG2
3.70537e-261	0.82543	0.399	0.056	1.24271e-256	Neuroblast	TAGLN3
4.14147e-261	0.696147	0.344	0.037	1.38897e-256	Neuroblast	ELFN2
1.50159e-260	0.871984	0.481	0.093	5.03605e-256	Neuroblast	JPH4
2.36204e-259	0.820182	0.29	0.021	7.92182e-255	Neuroblast	NPTX2
2.65204e-259	0.677744	0.339	0.034	8.89442e-255	Neuroblast	PLK2
3.91256e-258	0.747773	0.366	0.044	1.31219e-253	Neuroblast	BICDL1
6.14719e-258	1.06473	0.498	0.104	2.06164e-253	Neuroblast	H2AFZ
2.60609e-257	1.91709	0.907	0.65	8.7403e-253	Neuroblast	RBFOX1
1.33338e-256	1.69287	0.802	0.417	4.47188e-252	Neuroblast	RPL32
1.14608e-255	2.24997	0.777	0.397	3.84373e-251	Neuroblast	TMSB10
3.72999e-254	0.656061	0.388	0.052	1.25096e-249	Neuroblast	DUSP8
4.16175e-254	0.684375	0.326	0.033	1.39577e-249	Neuroblast	CDC42EP3
2.1657e-253	0.734388	0.3	0.025	7.26334e-249	Neuroblast	PRKCG
2.72719e-253	0.553384	0.325	0.031	9.14644e-249	Neuroblast	SLC6A17
2.33356e-251	0.87084	0.464	0.088	7.8263e-247	Neuroblast	FSCN1
1.45567e-250	0.778132	0.4	0.06	4.88202e-246	Neuroblast	UBE2S
3.03938e-250	0.865091	0.402	0.061	1.01935e-245	Neuroblast	PGBD5
4.23331e-249	0.707022	0.404	0.061	1.41977e-244	Neuroblast	TSPAN13
2.002e-248	1.02124	0.502	0.109	6.71432e-244	Neuroblast	ATP8A2
2.21901e-248	0.616962	0.272	0.019	7.44212e-244	Neuroblast	HPCA
1.3999e-246	0.544225	0.281	0.021	4.69498e-242	Neuroblast	CACNA1I
4.15162e-246	0.880694	0.496	0.108	1.39237e-241	Neuroblast	CCSAP
3.58698e-245	0.481404	0.282	0.021	1.203e-240	Neuroblast	PHYHIP
1.42485e-244	0.610214	0.27	0.019	4.77868e-240	Neuroblast	CRYM
4.95226e-244	0.714661	0.399	0.06	1.66089e-239	Neuroblast	PTPRN
8.95752e-244	0.910923	0.486	0.104	3.00417e-239	Neuroblast	MCF2L
9.55399e-244	0.650955	0.262	0.017	3.20422e-239	Neuroblast	NPR3
1.03569e-243	0.549177	0.277	0.021	3.47349e-239	Neuroblast	PRDM8
1.28271e-242	1.21425	0.46	0.088	4.30195e-238	Neuroblast	CLMP
2.04184e-242	0.53385	0.288	0.024	6.84792e-238	Neuroblast	HOOK1
3.16095e-242	1.39403	0.537	0.132	1.06012e-237	Neuroblast	NNAT
7.91213e-242	0.876757	0.456	0.087	2.65357e-237	Neuroblast	FRRS1L
1.0063e-241	0.747592	0.291	0.025	3.37494e-237	Neuroblast	NEUROD6
3.23717e-241	1.04338	0.582	0.154	1.08568e-236	Neuroblast	MIR137HG
9.44571e-240	0.564837	0.267	0.019	3.1679e-235	Neuroblast	SNCB
4.04664e-239	0.706148	0.359	0.047	1.35716e-234	Neuroblast	CDKN2D
8.40146e-239	1.08478	0.498	0.111	2.81768e-234	Neuroblast	AK5
1.07304e-238	0.451733	0.258	0.017	3.59875e-234	Neuroblast	HCN2
1.13051e-238	0.685015	0.32	0.033	3.79151e-234	Neuroblast	NEFL
3.87245e-238	1.46877	0.9	0.61	1.29874e-233	Neuroblast	GRIA2
4.24871e-238	0.868618	0.364	0.049	1.42493e-233	Neuroblast	NRSN1
4.52568e-238	1.45541	0.547	0.14	1.51782e-233	Neuroblast	DSCAML1
1.03085e-237	1.3693	0.601	0.189	3.45727e-233	Neuroblast	XKR4
2.76574e-237	0.654001	0.334	0.039	9.27575e-233	Neuroblast	NECTIN1
5.49757e-237	0.467059	0.253	0.016	1.84377e-232	Neuroblast	SPNS2
8.59855e-237	0.767395	0.368	0.05	2.88378e-232	Neuroblast	RASGRF1
4.13673e-236	1.41895	0.52	0.128	1.38738e-231	Neuroblast	CCDC59
1.55878e-235	1.61584	0.588	0.179	5.22785e-231	Neuroblast	CALM3
1.6311e-234	1.28923	0.487	0.108	5.47039e-230	Neuroblast	YWHAH
2.26828e-234	0.526694	0.292	0.027	7.60737e-230	Neuroblast	CPLX1
4.97034e-234	0.624603	0.307	0.032	1.66695e-229	Neuroblast	LNX1
6.46261e-234	1.17932	0.57	0.156	2.16743e-229	Neuroblast	SOX11
1.00982e-233	1.10764	0.569	0.161	3.38675e-229	Neuroblast	PLPPR4
6.11037e-232	1.36976	0.553	0.151	2.0493e-227	Neuroblast	ENC1
7.67232e-232	1.07403	0.495	0.114	2.57314e-227	Neuroblast	STMN4
1.32704e-231	1.22272	0.624	0.221	4.45061e-227	Neuroblast	AGAP3
1.68864e-231	0.445597	0.27	0.021	5.66335e-227	Neuroblast	RAB3A
9.12492e-230	1.47299	0.858	0.591	3.06031e-225	Neuroblast	RPL37A
2.82641e-229	0.492021	0.256	0.018	9.47923e-225	Neuroblast	AGAP2
2.42451e-228	0.974939	0.344	0.045	8.13133e-224	Neuroblast	LINC01588
6.09132e-228	1.43289	0.753	0.418	2.04291e-223	Neuroblast	STXBP1
1.57124e-226	0.560557	0.318	0.036	5.26962e-222	Neuroblast	NSG1
1.94466e-226	0.783015	0.349	0.047	6.522e-222	Neuroblast	MPPED1
4.13681e-225	0.700843	0.271	0.023	1.3874e-220	Neuroblast	HIST1H2BD
6.19072e-223	0.596736	0.354	0.051	2.07624e-218	Neuroblast	MIR124-2HG
7.6448e-223	1.61113	0.721	0.347	2.56391e-218	Neuroblast	RPL34
2.57846e-222	1.4251	0.674	0.273	8.64764e-218	Neuroblast	CACNA1E
1.22106e-221	0.857109	0.404	0.07	4.0952e-217	Neuroblast	CALY
1.55329e-221	1.25011	0.64	0.223	5.20943e-217	Neuroblast	UNC79
1.79737e-221	1.03154	0.46	0.1	6.02801e-217	Neuroblast	EPHA4
3.83646e-221	0.964579	0.433	0.09	1.28667e-216	Neuroblast	MLLT11
1.3002e-220	0.872208	0.401	0.07	4.36061e-216	Neuroblast	KLHL29
1.57101e-220	1.54043	0.707	0.321	5.26886e-216	Neuroblast	RPL26
2.78003e-220	1.60377	0.809	0.51	9.32367e-216	Neuroblast	RPS18
1.40208e-218	1.03704	0.499	0.127	4.7023e-214	Neuroblast	BEX2
6.05166e-218	0.412877	0.254	0.02	2.02961e-213	Neuroblast	NUDT11
2.71518e-217	0.772169	0.358	0.055	9.10618e-213	Neuroblast	MAP3K9
3.85372e-217	0.720496	0.331	0.044	1.29246e-212	Neuroblast	VSNL1
8.05827e-217	1.637	0.814	0.543	2.70258e-212	Neuroblast	RPS24
3.33717e-215	0.619871	0.291	0.031	1.11922e-210	Neuroblast	GPRIN3
1.39369e-214	1.50781	0.763	0.425	4.67416e-210	Neuroblast	RPS8
1.5742e-214	0.637546	0.273	0.026	5.27956e-210	Neuroblast	AC020911.2
1.64201e-214	0.862773	0.38	0.065	5.50697e-210	Neuroblast	TUFT1
2.98644e-214	0.564438	0.332	0.045	1.00159e-209	Neuroblast	SLC6A15
4.42321e-214	0.645756	0.284	0.03	1.48345e-209	Neuroblast	NR4A1
[truncated: 2,534 more rows]

## Sheet: Fig3.scHPF
Potential marker genes identified by scHPF
	rowname	colname	gene	celltype	Type
1	1	V2	MYBPH	pNSC-2	Primed NSC
2	2	V2	ATP6V0D2	pNSC-2	Primed NSC
3	3	V2	CHI3L1	pNSC-2	Primed NSC
4	4	V2	SULT1C2	pNSC-2	Primed NSC
5	5	V2	KYNU	pNSC-2	Primed NSC
6	6	V2	SPOCD1	pNSC-2	Primed NSC
7	7	V2	CDKN2B	pNSC-2	Primed NSC
8	8	V2	LIF	pNSC-2	Primed NSC
9	9	V2	TNFRSF12A	pNSC-2	Primed NSC
10	10	V2	GDF15	pNSC-2	Primed NSC
11	11	V2	CES1	pNSC-2	Primed NSC
12	12	V2	TSLP	pNSC-2	Primed NSC
13	13	V2	HMGA2	pNSC-2	Primed NSC
14	14	V2	SERPINE2	pNSC-2	Primed NSC
15	15	V2	FOLR3	pNSC-2	Primed NSC
16	16	V2	ITGA5	pNSC-2	Primed NSC
17	17	V2	BIRC3	pNSC-2	Primed NSC
18	18	V2	CLEC2B	pNSC-2	Primed NSC
19	19	V2	SLC4A7	pNSC-2	Primed NSC
20	20	V2	CCDC71	pNSC-2	Primed NSC
21	21	V2	ICAM1	pNSC-2	Primed NSC
22	22	V2	HMOX1	pNSC-2	Primed NSC
23	23	V2	HSPE1	pNSC-2	Primed NSC
24	24	V2	BACE2	pNSC-2	Primed NSC
25	25	V2	CFAP298	pNSC-2	Primed NSC
26	26	V2	CCR7	pNSC-2	Primed NSC
27	27	V2	SPRED3	pNSC-2	Primed NSC
28	28	V2	MDM2	pNSC-2	Primed NSC
29	29	V2	C6orf141	pNSC-2	Primed NSC
30	30	V2	SIPA1L2	pNSC-2	Primed NSC
31	31	V2	TUBB6	pNSC-2	Primed NSC
32	32	V2	CASP4	pNSC-2	Primed NSC
33	33	V2	TMEM71	pNSC-2	Primed NSC
34	34	V2	HS3ST3A1	pNSC-2	Primed NSC
35	35	V2	ARHGAP29	pNSC-2	Primed NSC
36	36	V2	SPHK1	pNSC-2	Primed NSC
37	37	V2	KCNH1	pNSC-2	Primed NSC
38	38	V2	PPP1R3B	pNSC-2	Primed NSC
39	39	V2	TFCP2L1	pNSC-2	Primed NSC
40	40	V2	WARS	pNSC-2	Primed NSC
41	41	V2	IL15RA	pNSC-2	Primed NSC
42	42	V2	SLC9A2	pNSC-2	Primed NSC
43	43	V2	ANGPT2	pNSC-2	Primed NSC
44	44	V2	PTX3	pNSC-2	Primed NSC
45	45	V2	ARHGAP9	pNSC-2	Primed NSC
46	46	V2	PDE11A.1	pNSC-2	Primed NSC
47	47	V2	NR0B1	pNSC-2	Primed NSC
48	48	V2	METTL18	pNSC-2	Primed NSC
49	49	V2	NSUN5	pNSC-2	Primed NSC
50	50	V2	IL1R1	pNSC-2	Primed NSC
51	51	V2	FLNC	pNSC-2	Primed NSC
52	52	V2	RBBP8	pNSC-2	Primed NSC
53	53	V2	LONRF3	pNSC-2	Primed NSC
54	54	V2	G6PD	pNSC-2	Primed NSC
55	55	V2	ANXA8	pNSC-2	Primed NSC
56	56	V2	KRT75	pNSC-2	Primed NSC
57	57	V2	PIEZO1	pNSC-2	Primed NSC
58	58	V2	ADAM12	pNSC-2	Primed NSC
59	59	V2	SHMT2	pNSC-2	Primed NSC
60	60	V2	IL18R1	pNSC-2	Primed NSC
61	61	V2	AGTR1	pNSC-2	Primed NSC
62	62	V2	MYBBP1A	pNSC-2	Primed NSC
63	63	V2	STK32A	pNSC-2	Primed NSC
64	64	V2	FAM83G	pNSC-2	Primed NSC
65	65	V2	NQO1	pNSC-2	Primed NSC
66	66	V2	MYOF	pNSC-2	Primed NSC
67	67	V2	DPH2	pNSC-2	Primed NSC
68	68	V2	CCR1	pNSC-2	Primed NSC
69	69	V2	RRS1	pNSC-2	Primed NSC
70	70	V2	VEGFC	pNSC-2	Primed NSC
71	71	V2	XPNPEP2	pNSC-2	Primed NSC
72	72	V2	IFRD2	pNSC-2	Primed NSC
73	73	V2	TRAK2	pNSC-2	Primed NSC
74	74	V2	EPAS1	pNSC-2	Primed NSC
75	75	V2	TMEM38B	pNSC-2	Primed NSC
76	76	V2	PDPN	pNSC-2	Primed NSC
77	77	V2	ABCF2	pNSC-2	Primed NSC
78	78	V2	RPP25L	pNSC-2	Primed NSC
79	79	V2	S100A16	pNSC-2	Primed NSC
80	80	V2	CRYAB	pNSC-2	Primed NSC
81	81	V2	HBB	pNSC-2	Primed NSC
82	82	V2	KLHDC7A	pNSC-2	Primed NSC
83	83	V2	HARBI1	pNSC-2	Primed NSC
84	84	V2	HLX	pNSC-2	Primed NSC
85	85	V2	METTL1	pNSC-2	Primed NSC
86	86	V2	PARP12	pNSC-2	Primed NSC
87	87	V2	OSGIN1	pNSC-2	Primed NSC
88	88	V2	MTHFD2	pNSC-2	Primed NSC
89	89	V2	BBS5	pNSC-2	Primed NSC
90	90	V2	PCGF1	pNSC-2	Primed NSC
91	91	V2	C20orf203	pNSC-2	Primed NSC
92	92	V2	UPP1	pNSC-2	Primed NSC
93	93	V2	POLR2J3	pNSC-2	Primed NSC
94	94	V2	KIAA0391	pNSC-2	Primed NSC
95	95	V2	IPO4	pNSC-2	Primed NSC
96	96	V2	SLC30A2	pNSC-2	Primed NSC
97	97	V2	IARS	pNSC-2	Primed NSC
98	98	V2	MAP3K20	pNSC-2	Primed NSC
99	99	V2	ACVR1	pNSC-2	Primed NSC
100	100	V2	PSMB8	pNSC-2	Primed NSC
201	1	V4	LHFPL3	pNSC-1	Primed NSC
202	2	V4	EGFR	pNSC-1	Primed NSC
203	3	V4	CPXM1	pNSC-1	Primed NSC
204	4	V4	GAS1	pNSC-1	Primed NSC
205	5	V4	OLIG1	pNSC-1	Primed NSC
206	6	V4	OLIG2	pNSC-1	Primed NSC
207	7	V4	METTL7B	pNSC-1	Primed NSC
208	8	V4	SHROOM4	pNSC-1	Primed NSC
209	9	V4	IRX1	pNSC-1	Primed NSC
210	10	V4	KLHDC8A	pNSC-1	Primed NSC
211	11	V4	MMP2	pNSC-1	Primed NSC
212	12	V4	SGO1	pNSC-1	Primed NSC
213	13	V4	AC087632.1	pNSC-1	Primed NSC
214	14	V4	TROAP	pNSC-1	Primed NSC
215	15	V4	SCN7A	pNSC-1	Primed NSC
216	16	V4	NEIL3	pNSC-1	Primed NSC
217	17	V4	GRIK2	pNSC-1	Primed NSC
218	18	V4	BUB1B	pNSC-1	Primed NSC
219	19	V4	SMOC1	pNSC-1	Primed NSC
220	20	V4	CDK6	pNSC-1	Primed NSC
221	21	V4	GLI1	pNSC-1	Primed NSC
222	22	V4	LFNG	pNSC-1	Primed NSC
223	23	V4	MFNG	pNSC-1	Primed NSC
224	24	V4	ADAMTS6	pNSC-1	Primed NSC
225	25	V4	PBK	pNSC-1	Primed NSC
226	26	V4	DEPDC1	pNSC-1	Primed NSC
227	27	V4	STEAP4	pNSC-1	Primed NSC
228	28	V4	E2F2	pNSC-1	Primed NSC
229	29	V4	E2F8	pNSC-1	Primed NSC
230	30	V4	PRDM1	pNSC-1	Primed NSC
231	31	V4	CENPF	pNSC-1	Primed NSC
232	32	V4	SYNDIG1	pNSC-1	Primed NSC
233	33	V4	TMEM80	pNSC-1	Primed NSC
234	34	V4	FERMT1	pNSC-1	Primed NSC
235	35	V4	HJURP	pNSC-1	Primed NSC
236	36	V4	DPF3	pNSC-1	Primed NSC
237	37	V4	GLUD2	pNSC-1	Primed NSC
238	38	V4	GALR1	pNSC-1	Primed NSC
239	39	V4	HES6	pNSC-1	Primed NSC
240	40	V4	CCDC178	pNSC-1	Primed NSC
241	41	V4	KIF18B	pNSC-1	Primed NSC
242	42	V4	HHIP	pNSC-1	Primed NSC
243	43	V4	PIK3R2	pNSC-1	Primed NSC
244	44	V4	MELK	pNSC-1	Primed NSC
245	45	V4	SEZ6L	pNSC-1	Primed NSC
246	46	V4	PRR5L	pNSC-1	Primed NSC
247	47	V4	KIF18A	pNSC-1	Primed NSC
248	48	V4	SMOC2	pNSC-1	Primed NSC
249	49	V4	AC015688.4	pNSC-1	Primed NSC
250	50	V4	DTL	pNSC-1	Primed NSC
251	51	V4	NCAPG	pNSC-1	Primed NSC
252	52	V4	CEMIP	pNSC-1	Primed NSC
253	53	V4	VWA1	pNSC-1	Primed NSC
254	54	V4	CSPG4	pNSC-1	Primed NSC
255	55	V4	NDC80	pNSC-1	Primed NSC
256	56	V4	CDKN2A	pNSC-1	Primed NSC
257	57	V4	SLC6A9	pNSC-1	Primed NSC
258	58	V4	MKI67	pNSC-1	Primed NSC
259	59	V4	LRRN1	pNSC-1	Primed NSC
260	60	V4	CDK1	pNSC-1	Primed NSC
261	61	V4	SLC35A3	pNSC-1	Primed NSC
262	62	V4	ZNF804B	pNSC-1	Primed NSC
263	63	V4	MOG	pNSC-1	Primed NSC
264	64	V4	SPSB4	pNSC-1	Primed NSC
265	65	V4	SLC24A3	pNSC-1	Primed NSC
266	66	V4	PDGFRA	pNSC-1	Primed NSC
267	67	V4	KLHL4	pNSC-1	Primed NSC
268	68	V4	PTCH1	pNSC-1	Primed NSC
269	69	V4	DOCK10	pNSC-1	Primed NSC
270	70	V4	ESCO2	pNSC-1	Primed NSC
271	71	V4	BUB1	pNSC-1	Primed NSC
272	72	V4	INO80B-WBP1	pNSC-1	Primed NSC
273	73	V4	STAC	pNSC-1	Primed NSC
274	74	V4	SPC25	pNSC-1	Primed NSC
275	75	V4	SKA1	pNSC-1	Primed NSC
276	76	V4	GLCCI1	pNSC-1	Primed NSC
277	77	V4	KCNE5	pNSC-1	Primed NSC
278	78	V4	DUSP10	pNSC-1	Primed NSC
279	79	V4	CDC25C	pNSC-1	Primed NSC
280	80	V4	TRIM55	pNSC-1	Primed NSC
281	81	V4	PMFBP1	pNSC-1	Primed NSC
282	82	V4	GAD1	pNSC-1	Primed NSC
283	83	V4	PPP1R3G	pNSC-1	Primed NSC
284	84	V4	DLGAP5	pNSC-1	Primed NSC
285	85	V4	ILDR2	pNSC-1	Primed NSC
286	86	V4	EXO1	pNSC-1	Primed NSC
287	87	V4	MAP3K1	pNSC-1	Primed NSC
288	88	V4	DLL3	pNSC-1	Primed NSC
289	89	V4	COL22A1	pNSC-1	Primed NSC
290	90	V4	AC091057.6	pNSC-1	Primed NSC
291	91	V4	PLAU	pNSC-1	Primed NSC
292	92	V4	ASPM	pNSC-1	Primed NSC
293	93	V4	ERVFRD-1	pNSC-1	Primed NSC
294	94	V4	PM20D1	pNSC-1	Primed NSC
295	95	V4	INKA2	pNSC-1	Primed NSC
296	96	V4	BEST3	pNSC-1	Primed NSC
297	97	V4	NES	pNSC-1	Primed NSC
298	98	V4	ATP2C2	pNSC-1	Primed NSC
299	99	V4	SLC13A5	pNSC-1	Primed NSC
300	100	V4	POU3F4	pNSC-1	Primed NSC
501	1	V7	MEP1B	NB	Neuroblast
502	2	V7	SLC13A1	NB	Neuroblast
503	3	V7	C9orf57	NB	Neuroblast
504	4	V7	TMEM236	NB	Neuroblast
505	5	V7	IL17B	NB	Neuroblast
506	6	V7	AC092111.3	NB	Neuroblast
507	7	V7	OR5AU1	NB	Neuroblast
508	8	V7	CWH43	NB	Neuroblast
509	9	V7	IL5RA	NB	Neuroblast
510	10	V7	HECW1	NB	Neuroblast
511	11	V7	CPHXL	NB	Neuroblast
512	12	V7	GCM1	NB	Neuroblast
513	13	V7	TPH2	NB	Neuroblast
514	14	V7	TIMD4	NB	Neuroblast
515	15	V7	IL31RA	NB	Neuroblast
516	16	V7	PTF1A	NB	Neuroblast
517	17	V7	TOPAZ1	NB	Neuroblast
518	18	V7	ACOT12	NB	Neuroblast
519	19	V7	MYOCOS	NB	Neuroblast
520	20	V7	NPC1L1	NB	Neuroblast
521	21	V7	MEDAG	NB	Neuroblast
522	22	V7	CCBE1	NB	Neuroblast
523	23	V7	LEP	NB	Neuroblast
524	24	V7	TFAP2D	NB	Neuroblast
525	25	V7	EVPLL	NB	Neuroblast
526	26	V7	NANOS2	NB	Neuroblast
527	27	V7	PRSS12	NB	Neuroblast
528	28	V7	CLMP	NB	Neuroblast
529	29	V7	TBR1	NB	Neuroblast
530	30	V7	PTGES	NB	Neuroblast
531	31	V7	FGF18	NB	Neuroblast
532	32	V7	OTP	NB	Neuroblast
533	33	V7	IQCF1	NB	Neuroblast
534	34	V7	PLA2G12B	NB	Neuroblast
535	35	V7	NPR3	NB	Neuroblast
536	36	V7	ARSI	NB	Neuroblast
537	37	V7	NUTM1	NB	Neuroblast
538	38	V7	GOLGA6C	NB	Neuroblast
539	39	V7	HAVCR1	NB	Neuroblast
540	40	V7	EFNA5	NB	Neuroblast
541	41	V7	IDI2	NB	Neuroblast
542	42	V7	PTPRU	NB	Neuroblast
543	43	V7	OR4E2	NB	Neuroblast
544	44	V7	SLC22A7	NB	Neuroblast
545	45	V7	SLC30A8	NB	Neuroblast
546	46	V7	CD28	NB	Neuroblast
547	47	V7	IL31	NB	Neuroblast
548	48	V7	LY75-CD302	NB	Neuroblast
549	49	V7	C1orf146	NB	Neuroblast
550	50	V7	TGM6	NB	Neuroblast
551	51	V7	HIST1H4H	NB	Neuroblast
552	52	V7	HHLA1	NB	Neuroblast
553	53	V7	PLET1	NB	Neuroblast
554	54	V7	SPANXN3	NB	Neuroblast
555	55	V7	CYP2C18	NB	Neuroblast
556	56	V7	MMP13	NB	Neuroblast
557	57	V7	NPFFR2	NB	Neuroblast
558	58	V7	PIGR	NB	Neuroblast
559	59	V7	DSCAML1	NB	Neuroblast
560	60	V7	MTFR2	NB	Neuroblast
561	61	V7	KRTAP3-2	NB	Neuroblast
562	62	V7	CES5A	NB	Neuroblast
563	63	V7	TMEM269	NB	Neuroblast
564	64	V7	SOSTDC1	NB	Neuroblast
565	65	V7	KIF4B	NB	Neuroblast
566	66	V7	AQP8	NB	Neuroblast
567	67	V7	DPRX	NB	Neuroblast
568	68	V7	DLX5	NB	Neuroblast
569	69	V7	HIST1H2BD	NB	Neuroblast
570	70	V7	SCML4	NB	Neuroblast
571	71	V7	NLRP9	NB	Neuroblast
572	72	V7	GLYAT	NB	Neuroblast
573	73	V7	BCL11B	NB	Neuroblast
574	74	V7	KRT17	NB	Neuroblast
575	75	V7	LYPD8	NB	Neuroblast
576	76	V7	LDLRAD1	NB	Neuroblast
577	77	V7	TNN	NB	Neuroblast
578	78	V7	MYT1	NB	Neuroblast
579	79	V7	BPI	NB	Neuroblast
580	80	V7	SLC22A10	NB	Neuroblast
581	81	V7	NOX3	NB	Neuroblast
582	82	V7	FAM209A	NB	Neuroblast
583	83	V7	TRPM3	NB	Neuroblast
584	84	V7	DOK6	NB	Neuroblast
585	85	V7	CAPN6	NB	Neuroblast
586	86	V7	KIF26A	NB	Neuroblast
587	87	V7	COLEC11	NB	Neuroblast
588	88	V7	MTMR7	NB	Neuroblast
589	89	V7	CACNA1B	NB	Neuroblast
590	90	V7	GLRA2	NB	Neuroblast
591	91	V7	LRRC7	NB	Neuroblast
592	92	V7	GOLGA6A	NB	Neuroblast
593	93	V7	TXNIP	NB	Neuroblast
594	94	V7	TMEM196	NB	Neuroblast
595	95	V7	SPAAR	NB	Neuroblast
596	96	V7	ALDH8A1	NB	Neuroblast
597	97	V7	TRPC5OS	NB	Neuroblast
598	98	V7	GLIS1	NB	Neuroblast
599	99	V7	ADCY10	NB	Neuroblast
600	100	V7	HS3ST4	NB	Neuroblast
601	1	V8	CALM3	aNSC	aNSC
602	2	V8	STMN1	aNSC	aNSC
603	3	V8	HSPA6	aNSC	aNSC
604	4	V8	NRGN	aNSC	aNSC
605	5	V8	GABRG2	aNSC	aNSC
606	6	V8	OLFM1	aNSC	aNSC
607	7	V8	YWHAH	aNSC	aNSC
608	8	V8	TTC9B	aNSC	aNSC
609	9	V8	EEF1A2	aNSC	aNSC
610	10	V8	NRN1	aNSC	aNSC
611	11	V8	CNIH2	aNSC	aNSC
612	12	V8	CAMK2A	aNSC	aNSC
613	13	V8	OSTN	aNSC	aNSC
614	14	V8	NPTX2	aNSC	aNSC
615	15	V8	NEFL	aNSC	aNSC
616	16	V8	TCEAL5	aNSC	aNSC
617	17	V8	CDKN2D	aNSC	aNSC
618	18	V8	AJAP1	aNSC	aNSC
619	19	V8	FXYD7	aNSC	aNSC
620	20	V8	NEFM	aNSC	aNSC
621	21	V8	GNG3	aNSC	aNSC
622	22	V8	RRAD	aNSC	aNSC
623	23	V8	TAC1	aNSC	aNSC
624	24	V8	BEX5	aNSC	aNSC
625	25	V8	NEUROD6	aNSC	aNSC
626	26	V8	HPCA	aNSC	aNSC
627	27	V8	BDNF	aNSC	aNSC
628	28	V8	GABRA5	aNSC	aNSC
629	29	V8	PRKCG	aNSC	aNSC
630	30	V8	CAMK2N2	aNSC	aNSC
631	31	V8	MYLIP	aNSC	aNSC
632	32	V8	SLC6A17	aNSC	aNSC
633	33	V8	NTS	aNSC	aNSC
634	34	V8	SNCB	aNSC	aNSC
635	35	V8	RGS4	aNSC	aNSC
636	36	V8	CRYM	aNSC	aNSC
637	37	V8	MAL2	aNSC	aNSC
638	38	V8	CREG2	aNSC	aNSC
639	39	V8	ADCYAP1	aNSC	aNSC
640	40	V8	FST	aNSC	aNSC
641	41	V8	DNAJC12	aNSC	aNSC
642	42	V8	SNCG	aNSC	aNSC
643	43	V8	ALKAL2	aNSC	aNSC
644	44	V8	PENK	aNSC	aNSC
645	45	V8	HPCAL4	aNSC	aNSC
646	46	V8	CALB2	aNSC	aNSC
647	47	V8	RAB3A	aNSC	aNSC
648	48	V8	RND1	aNSC	aNSC
649	49	V8	PHYHIP	aNSC	aNSC
650	50	V8	CALCB	aNSC	aNSC
651	51	V8	FABP3	aNSC	aNSC
652	52	V8	KCNG3	aNSC	aNSC
653	53	V8	KCNA1	aNSC	aNSC
654	54	V8	C1QL3	aNSC	aNSC
655	55	V8	DOC2B	aNSC	aNSC
656	56	V8	GPR22	aNSC	aNSC
657	57	V8	FCRLB	aNSC	aNSC
658	58	V8	CLDN4	aNSC	aNSC
659	59	V8	AKR1C2	aNSC	aNSC
660	60	V8	ICAM5	aNSC	aNSC
661	61	V8	NPAS4	aNSC	aNSC
662	62	V8	NPTX1	aNSC	aNSC
663	63	V8	TGFBR3L	aNSC	aNSC
664	64	V8	TRNP1	aNSC	aNSC
665	65	V8	CNGB1	aNSC	aNSC
666	66	V8	SERTM1	aNSC	aNSC
667	67	V8	COX7A1	aNSC	aNSC
668	68	V8	FOSB	aNSC	aNSC
669	69	V8	PDYN	aNSC	aNSC
670	70	V8	KCNJ12	aNSC	aNSC
671	71	V8	MMP10	aNSC	aNSC
672	72	V8	RAB11FIP1	aNSC	aNSC
673	73	V8	FAM153B	aNSC	aNSC
674	74	V8	AREG	aNSC	aNSC
675	75	V8	TRPC7	aNSC	aNSC
676	76	V8	RBP4	aNSC	aNSC
677	77	V8	SYT3	aNSC	aNSC
678	78	V8	TUNAR	aNSC	aNSC
679	79	V8	KRT19	aNSC	aNSC
680	80	V8	GSDMA	aNSC	aNSC
681	81	V8	FAM71E1	aNSC	aNSC
682	82	V8	RIIAD1	aNSC	aNSC
683	83	V8	ACTA1	aNSC	aNSC
684	84	V8	EPB42	aNSC	aNSC
685	85	V8	EFCAB8	aNSC	aNSC
686	86	V8	UNC45B	aNSC	aNSC
687	87	V8	PHF24	aNSC	aNSC
688	88	V8	CA4	aNSC	aNSC
689	89	V8	GRM4	aNSC	aNSC
690	90	V8	NTF3	aNSC	aNSC
691	91	V8	NKD2	aNSC	aNSC
692	92	V8	POU2F3	aNSC	aNSC
693	93	V8	ADRA2A	aNSC	aNSC
694	94	V8	C1orf127	aNSC	aNSC
695	95	V8	SGPP2	aNSC	aNSC
696	96	V8	PHLDA2	aNSC	aNSC
697	97	V8	DLL4	aNSC	aNSC
698	98	V8	RASIP1	aNSC	aNSC
699	99	V8	LRRC73	aNSC	aNSC
700	100	V8	ULBP1	aNSC	aNSC
