# Supplementary material for: Deciphering molecular heterogeneity and dynamics of human hippocampal neural stem cells at different ages and injury states
Source: eLife. 2024 Apr 12;12:RP89507. doi: 10.7554/eLife.89507 (PMC11014727; doi:10.7554/eLife.89507)
Supplement: Figure 4—source data 1. [file elife-89507-fig4-data1.xlsx]

## Sheet: Fig4B-qNSC1 vs pNSC
The GO analysis of down-regulate genes of qNSC1 compared with pNSC
ID	Description	GeneRatio	BgRatio	pvalue	p.adjust	qvalue	geneID	Count
GO:0019080	viral gene expression	66/1007	111/16374	2.91443e-51	1.16664e-47	1.05134e-47	RPL10A/RPL37A/RPS25/NUP107/RPL37/RPS18/RPL3/RPL13/RPL12/RPS21/NUP160/RPS23/RPS2/RPS15/RPL14/RPL13A/RPL19/RPS24/NUP214/RPL32/RPS8/RPL31/RPL11/RPL10/RANBP2/RPL26/RPS6/RPLP2/RPL28/RPL23A/RPL41/NUP58/RPL38/RPL6/RPS7/RPL35/RPL34/RPL8/RPL24/RPS20/RPS27/RPS14/RPS16/RPS9/RPL23/RPL15/NUP153/RPL21/RPL5/RPS3/RPS11/NUP98/TPR/RPL29/RPS12/RPS27A/RPL27A/RPS19/RPL7A/RPS13/RPS3A/RPL9/RPL30/RPS5/RPL18/RPL18A	66
GO:0006413	translational initiation	76/1007	160/16374	3.35067e-49	4.73184e-46	4.26418e-46	RPL10A/RPL37A/RPS25/EIF3B/EIF5B/RPL37/RPS18/RPL3/EIF3H/EIF4A1/RPL13/PABPC1/RPL12/RPS21/RPS23/RPS2/RPS15/RPL14/RPL13A/RPL19/RPS24/RPL32/RPS8/RPL31/RPL11/RPL10/RPL26/RPS6/RPLP2/RPL28/RPL23A/RPL41/EIF4B/RPL38/RPL6/RPS7/RPL35/EIF2B1/RPL34/EIF3F/RPL8/EIF1/RPL24/RPS20/RPS27/RPS14/RPS16/RPS9/RPL23/RPL15/EIF3J/EIF5/RPL21/RPL5/EIF2B3/RPS3/RPS11/TPR/RPL29/EIF3A/CDC123/RPS12/RPS27A/RPL27A/RPS19/RPL7A/RPS13/…	76
GO:0006614	SRP-dependent cotranslational protein targeting to membrane	61/1007	98/16374	3.54622e-49	4.73184e-46	4.26418e-46	RPL10A/RPL37A/RPS25/RPL37/RPS18/RPL3/RPL13/RPL12/SRP54/RPS21/RPS23/RPS2/RPS15/RPL14/RPL13A/RPL19/RPS24/RPL32/RPS8/RPL31/RPL11/RPL10/RPL26/RPS6/RPLP2/RPL28/RPL23A/SRP14/RPL41/RPL38/RPL6/RPS7/RPL35/RPL34/RPL8/RPL24/RPS20/RPS27/RPS14/RPS16/RPS9/RPL23/RPL15/RPL21/RPL5/RPS3/RPS11/RPL29/RPS12/RPS27A/RPL27A/SRP19/RPS19/RPL7A/RPS13/RPS3A/RPL9/RPL30/RPS5/RPL18/RPL18A	61
GO:0043043	peptide biosynthetic process	104/1007	328/16374	8.14501e-47	8.15111e-44	7.34551e-44	RPL10A/RPS27L/DHX36/IARS/RPL37A/RPS25/LARS/EIF3B/EIF5B/RPL37/RPS18/RPL3/EIF3H/EIF4A1/RBM8A/RPL13/EEF1A1/PABPC1/RPL12/RPS21/RPS23/RPS2/RPS15/RPL14/RPL13A/SOX4/RPL19/RPS24/MKNK2/RPL32/RACK1/RPS8/RPL31/RPL11/RPL10/PTCD3/VIM/RPL26/RPS6/RPLP2/RARS/RPL28/RPL23A/RPL41/PUM2/EIF4B/RPL38/RPL6/RPS7/DAPK3/RPL35/EIF2B1/RPL34/EIF3F/RPL8/EIF1/RPL24/RPS20/RBM3/RPS27/RPS14/RPS16/RPS9/LARP4B/RPL23/NPM1/RPL15/WARS/…	104
GO:0019083	viral transcription	71/1007	149/16374	3.95846e-46	3.16915e-43	2.85593e-43	RPL10A/RPL37A/RPS25/NUP107/RPL37/RPS18/RPL3/RPL13/RPL12/RPS21/NUP160/RPS23/RPS2/RPS15/RPL14/RPL13A/RPL19/RPS24/NUP214/RPL32/RPS8/RPL31/RPL11/RPL10/RANBP2/RPL26/POLR2F/RPS6/RPLP2/RPL28/RPL23A/RPL41/NUP58/POLR2B/RPL38/RPL6/RPS7/RPL35/RPL34/RPL8/RPL24/RPS20/RPS27/RPS14/RPS16/RPS9/RPL23/RPL15/NUP153/RPL21/RPL5/CCNT1/RPS3/RPS11/POLR2A/NUP98/TPR/RPL29/GTF2F2/RPS12/RPS27A/RPL27A/RPS19/RPL7A/RPS13/RPS3A/…	71
GO:0000184	nuclear-transcribed mRNA catabolic process, nonsense-mediated decay	63/1007	118/16374	5.72239e-45	3.81779e-42	3.44046e-42	RPL10A/RPL37A/SMG6/RPS25/RPL37/RPS18/RPL3/RBM8A/RPL13/PABPC1/RPL12/RPS21/RPS23/RPS2/RPS15/RPL14/RPL13A/RPL19/RPS24/RPL32/RPS8/RPL31/RPL11/RPL10/RPL26/RPS6/RPLP2/RPL28/RPL23A/RPL41/RPL38/RPL6/RPS7/RPL35/RPL34/RPL8/RPL24/RPS20/RPS27/RPS14/RPS16/RPS9/RPL23/RPL15/RPL21/RPL5/RPS3/RPS11/RPL29/RPS12/RPS27A/RPL27A/DHX34/RPS19/PPP2R2A/RPL7A/RPS13/RPS3A/RPL9/RPL30/RPS5/RPL18/RPL18A	63
GO:0006412	translation	116/1007	471/16374	6.38688e-40	3.65238e-37	3.2914e-37	EGFR/RPL10A/RPS27L/DHX36/IARS/RPL37A/RPS25/LARS/MRPL18/EIF3B/EIF5B/RPL37/RPS18/RPL3/EIF3H/EIF4A1/RBM8A/RPL36AL/RPL13/LRPPRC/EEF1A1/PABPC1/RPL12/RPS21/RPS23/RPS2/RPS15/MRPL50/RPL14/RPL13A/SOX4/RPL19/RPS24/MRPL3/MKNK2/RPL32/RACK1/TRMT10C/RPS8/RPL31/RPL11/RPL10/PTCD3/VIM/RPL26/RPS6/RPLP2/RARS/RPL28/RPL23A/RPL41/PUM2/MRPL21/EIF4B/RPL38/RPL6/RPS7/DAPK3/RPL35/EIF2B1/RPL34/EIF3F/DAP3/RPL8/EIF1/RPL24/RPS…	116
GO:0034605	cellular response to heat	35/1007	116/16374	1.05568e-15	5.28236e-13	4.76029e-13	CAMK2D/HSPH1/MYOF/CRYAB/DHX36/FKBP4/HMOX1/NUP107/HSPA6/HSF1/NUP160/CHORDC1/DNAJC7/PTGES3/NUP214/STAC/CDKN1A/RANBP2/NUP58/HSP90AA1/DNAJC2/DNAJB6/DNAJB1/VCP/RPTOR/ATR/NUP153/NUP98/TPR/BAG3/ARPP21/HSP90AB1/HSPA1A/HIKESHI/HSPA8	35
GO:1900034	regulation of cellular response to heat	27/1007	77/16374	3.20507e-14	1.42554e-11	1.28465e-11	CAMK2D/HSPH1/CRYAB/FKBP4/NUP107/HSF1/NUP160/CHORDC1/DNAJC7/PTGES3/NUP214/RANBP2/NUP58/HSP90AA1/DNAJC2/DNAJB6/DNAJB1/RPTOR/ATR/NUP153/NUP98/TPR/BAG3/HSP90AB1/HSPA1A/HIKESHI/HSPA8	27
GO:0033554	cellular response to stress	49/1007	237/16374	3.79763e-14	1.52019e-11	1.36995e-11	CAMK2D/HSPH1/CRYAB/CDK6/FKBP4/EGR1/NUP107/PRKDC/HSF1/HMGA2/NUP160/CHORDC1/DNAJC7/PSME4/PTGES3/NUP214/ROCK2/PSMD1/RANBP2/PRRX1/TP53/NUP58/HSP90AA1/PSMD12/UBB/DNAJC2/DNAJB6/BACH1/DNAJB1/PNPT1/NAMPT/RPTOR/ATR/NUP153/PSMA7/MCL1/PSMB7/NUP98/TPR/PSMD14/BAG3/RPS27A/PSMD5/HSP90AB1/PAWR/HSPA1A/HIKESHI/UBC/HSPA8	49
GO:0009408	response to heat	31/1007	120/16374	4.51778e-12	1.64406e-09	1.48157e-09	CAMK2D/HSPH1/CRYAB/FKBP4/NUP107/HSF1/NUP160/CHORDC1/DNAJC7/PTGES3/NUP214/RANBP2/NUP58/HSP90AA1/DNAJC2/EIF2B1/DNAJB6/DNAJB1/RPTOR/ATR/NUP153/EIF2B3/DNAJA1/NUP98/TPR/BAG3/HSP90AB1/DNAJA4/HSPA1A/HIKESHI/HSPA8	31
GO:0050821	protein stabilization	37/1007	169/16374	8.75306e-12	2.91987e-09	2.63129e-09	CRYAB/NAA15/TRIM44/GTPBP4/USP36/CCT4/SOX4/HSPD1/PTGES3/ZNF207/TAF1/CDKN1A/CCT2/RPL11/TP53/HSP90AA1/CCT8/RPS7/HIP1/MDM4/FBXW7/CCT5/ATP1B3/RPL23/CCT3/FLNA/RPL5/TCP1/MARCH7/MORC3/USP9X/BAG3/NLK/CCNH/HSP90AB1/HSPA1A/UBE2B	37
GO:0002181	cytoplasmic translation	16/1007	33/16374	1.61168e-11	4.96274e-09	4.47225e-09	RPL10A/DHX36/RPS21/RPS23/RPL19/RPL32/RPL31/RPL11/RPL41/RPL38/RPL6/RPL8/RPL24/RPL30/RPL18/RPL18A	16
GO:0000398	mRNA splicing, via spliceosome	50/1007	287/16374	1.83591e-11	5.24939e-09	4.73057e-09	KHDRBS3/HNRNPU/HNRNPA3/DDX5/RBM8A/TGS1/PABPC1/SFSWAP/SNRPD3/HNRNPL/SNRPD1/SNRNP200/PRPF6/STRAP/PRPF8/RBM25/DDX46/FUS/HNRNPM/NOVA1/HNRNPA2B1/SNU13/POLR2F/METTL16/POLR2B/U2SURP/CLNS1A/PRPF40A/WTAP/PRPF4B/MTREX/PCBP2/SF3B2/YTHDC1/YBX1/CSTF3/TXNL4A/POLR2A/PAPOLA/NUP98/HNRNPF/SF3B3/PNN/GTF2F2/DHX15/NUDT21/PRDX6/SCAF11/AQR/HSPA8	50
GO:0042254	ribosome biogenesis	34/1007	161/16374	1.72366e-10	4.59988e-08	4.14526e-08	NOP58/DDX21/WDR43/CEBPZ/DDX51/XRN2/RPS2/RPS15/RPL14/NAF1/HEATR1/RPS24/CHD7/RRN3/PDCD11/RPL11/SNU13/RPL26/RPS6/WDR36/RPS7/XPO1/DDX31/RPS27/RPS14/RPS16/MTREX/RPS9/NPM1/RCL1/RPL5/DIS3/RPS19/ERI1	34
GO:0006364	rRNA processing	30/1007	132/16374	3.10829e-10	7.38869e-08	6.65844e-08	NOP58/DDX21/WDR43/DDX51/BUD23/USP36/XRN2/RPS2/RPS15/RPL14/HEATR1/RPS24/CHD7/PDCD11/RPL11/SNU13/RPL26/RPS6/WDR36/RPS7/RPS27/RPS14/RPS16/MTREX/RPS9/RCL1/RPL5/DIS3/RPS19/ERI1	30
GO:0022613	ribonucleoprotein complex biogenesis	32/1007	148/16374	3.13784e-10	7.38869e-08	6.65844e-08	NOP58/DDX21/WDR43/DDX51/TGS1/XRN2/RPS2/RPS15/RPL14/HEATR1/RPS24/CHD7/PDCD11/RPL11/MRTO4/SNU13/RPL26/RPS6/WDR36/RPS7/XPO1/RPS27/RPS14/RPS16/MTREX/RPS9/NPM1/RCL1/RPL5/DIS3/RPS19/ERI1	32
GO:0006397	mRNA processing	41/1007	230/16374	5.9686e-10	1.32735e-07	1.19616e-07	KHDRBS3/DHX36/IWS1/HSF1/TGS1/RBFOX1/XRN2/SFSWAP/SNRPD3/SNRPD1/ARL6IP4/ZNF830/PRPF6/STRAP/PRPF8/PDCD11/RBM25/ADAR/HNRNPA2B1/METTL16/CPSF6/CLNS1A/ZRANB2/TENT2/VIRMA/WTAP/SF3B2/YTHDC1/TXNL4A/PAPOLA/NUP98/RBM28/ECD/DHX15/NUDT21/PRDX6/SCAF11/CIR1/TSEN2/TENT4A/HSPA8	41
GO:0043488	regulation of mRNA stability	25/1007	106/16374	4.12961e-09	8.70043e-07	7.84053e-07	DHX36/PABPC1/PSME4/NUP214/PSMD1/YTHDF2/VIM/PUM2/PSMD12/UBB/XPO1/PUM1/PSMA7/SERBP1/DIS3/YWHAB/PSMB7/PSMD14/RPS27A/PSMD5/PCID2/HSPA1A/HSPB1/UBC/HSPA8	25
GO:0006457	protein folding	25/1007	126/16374	1.60895e-07	3.22032e-05	2.90204e-05	HSPE1/CRYAB/FKBP4/GNG2/CCT4/DNAJC7/TBCA/PFDN2/GNB1/CCT2/RANBP2/CCT8/HSPA4L/DNAJB6/PPID/VCP/CCT5/ST13/CCT3/CSNK2A1/TCP1/DNAJA1/PPIA/BAG3/HSPA8	25
GO:0007004	telomere maintenance via telomerase	17/1007	66/16374	3.22285e-07	6.14337e-05	5.53619e-05	HNRNPU/SMG6/CCT4/NAF1/PTGES3/CCT2/HSP90AA1/CCT8/TNKS/CCT5/ATR/CCT3/CTNNB1/TCP1/MAP3K4/NAT10/HSP90AB1	17
GO:0075733	intracellular transport of virus	15/1007	53/16374	4.20774e-07	7.65617e-05	6.89948e-05	NUP107/KPNB1/NUP160/KPNA1/NUP214/RANBP2/NUP58/UBB/XPO1/NUP153/UBAP1/NUP98/TPR/RPS27A/UBC	15
GO:0071480	cellular response to gamma radiation	11/1007	29/16374	5.58435e-07	9.60386e-05	8.65467e-05	CRYAB/EGR1/MDM2/HSF1/CDKN1A/MAP3K20/RPL26/TP53/WRN/ATR/KDM1A	11
GO:0008380	RNA splicing	29/1007	171/16374	5.758e-07	9.60386e-05	8.65467e-05	IWS1/LUC7L3/RBFOX1/SNRPD3/SNRPD1/ARL6IP4/ZNF830/PRPF6/PRPF8/RBM25/FUS/NOVA1/ZRANB2/VIRMA/WTAP/PRPF4B/SF3B2/POLR2A/HNRNPF/RBM28/THOC2/ECD/THOC1/DHX15/SCAF11/PPIG/RPS13/CIR1/HSPA1A	29
GO:0006278	RNA-dependent DNA biosynthetic process	15/1007	56/16374	9.1934e-07	0.000147205	0.000132656	HNRNPU/SMG6/CCT4/NAF1/CCT2/CCT8/TNKS/CCT5/ATR/CCT3/CTNNB1/TCP1/MAP3K4/PPIA/NAT10	15
GO:0010833	telomere maintenance via telomere lengthening	16/1007	66/16374	1.72245e-06	0.000265192	0.000238982	HNRNPU/DHX36/SMG6/CCT4/NAF1/CCT2/HNRNPA2B1/CCT8/TNKS/CCT5/ATR/CCT3/CTNNB1/TCP1/MAP3K4/NAT10	16
GO:0006986	response to unfolded protein	17/1007	74/16374	1.84323e-06	0.000273276	0.000246267	HSPE1/HSPH1/HSPD1/HSPA4/HSP90AA1/HSPA4L/FAF2/DNAJB1/VCP/DNAJA1/MBTPS1/EIF2AK3/HSP90AB1/SERPINH1/HSPA1A/HSPB1/HSPA8	17
GO:0032212	positive regulation of telomere maintenance via telomerase	11/1007	34/16374	3.47356e-06	0.000496595	0.000447515	CCT4/NAF1/CCT2/CCT8/TNKS/CCT5/ATR/CCT3/CTNNB1/TCP1/MAP3K4	11
GO:1903405	protein localization to nuclear body	6/1007	9/16374	3.81393e-06	0.000508905	0.000458608	CCT4/CCT2/CCT8/CCT5/CCT3/TCP1	6
GO:1904871	positive regulation of protein localization to Cajal body	6/1007	9/16374	3.81393e-06	0.000508905	0.000458608	CCT4/CCT2/CCT8/CCT5/CCT3/TCP1	6
GO:0016070	RNA metabolic process	14/1007	56/16374	5.15951e-06	0.000666242	0.000600395	HNRNPU/HNRNPA3/XRN2/HNRNPL/HNRNPM/NOVA1/HNRNPA2B1/POLR2F/POLR2B/WTAP/PCBP2/POLR2A/HNRNPF/GTF2F2	14
GO:0070198	protein localization to chromosome, telomeric region	9/1007	24/16374	6.84598e-06	0.000856389	0.000771749	CCT4/CCT2/GNL3/CCT8/TNKS/CCT5/ATR/CCT3/TCP1	9
GO:0019058	viral life cycle	27/1007	173/16374	7.11072e-06	0.000862552	0.000777303	EGFR/NUP107/KPNB1/ITGB1/NUP160/KPNA1/NUP214/SLC20A2/RANBP2/NUP58/UBB/WWP1/XPO1/PPID/VCP/NUP153/LDLR/KPNA6/UBAP1/NUP98/PPIA/TPR/VTA1/RPS27A/HSP90AB1/HSPA1A/UBC	27
GO:0006611	protein export from nucleus	13/1007	51/16374	8.8771e-06	0.000977671	0.000881044	MDM2/TXN/NUP214/STRADB/HSPA9/TP53/XPO1/CTDSPL2/XPO4/XPO5/TPR/BAG3/XPO6	13
GO:0072332	intrinsic apoptotic signaling pathway by p53 class mediator	13/1007	51/16374	8.8771e-06	0.000977671	0.000881044	CD44/DDX5/MDM2/RRN3/RPL11/RPL26/TP53/UBB/RPS7/MARCH7/HINT1/KDM1A/IFI16	13
GO:1904851	positive regulation of establishment of protein localization to telomere	6/1007	10/16374	9.03668e-06	0.000977671	0.000881044	CCT4/CCT2/CCT8/CCT5/CCT3/TCP1	6
GO:1904867	protein localization to Cajal body	6/1007	10/16374	9.03668e-06	0.000977671	0.000881044	CCT4/CCT2/CCT8/CCT5/CCT3/TCP1	6
GO:1904874	positive regulation of telomerase RNA localization to Cajal body	7/1007	15/16374	1.35472e-05	0.00139393	0.00125616	CCT4/NAF1/CCT2/CCT8/CCT5/CCT3/TCP1	7
GO:0072331	signal transduction by p53 class mediator	26/1007	169/16374	1.35806e-05	0.00139393	0.00125616	CD44/TRIM24/DDX5/MDM2/RBBP8/TAF1/RBBP4/RRN3/RPL11/TP53/UBB/RPS7/RFC3/TAF7/WRN/TAF15/MDM4/RPL23/ATR/CSNK2A1/RPL5/MARCH7/TAF2/KDM1A/TAF3/SPRED1	26
GO:1905323	telomerase holoenzyme complex assembly	4/1007	4/16374	1.42255e-05	0.00141897	0.00127873	NAF1/PTGES3/HSP90AA1/HSP90AB1	4
GO:0016925	protein sumoylation	16/1007	77/16374	1.45336e-05	0.00141897	0.00127873	EGR1/NUP107/MDM2/UBE2I/SENP5/NUP160/NUP214/RANBP2/NUP58/GNL3/UBA2/NUP153/CTNNB1/NUP98/TPR/ZNF451	16
GO:0006360	transcription by RNA polymerase I	12/1007	46/16374	1.51862e-05	0.00144739	0.00130434	WDR43/TAF1D/MNAT1/HEATR1/TAF1/RRN3/POLR2F/ATF4/FLNA/POLR1A/CCNH/EIF2AK3	12
GO:0051131	chaperone-mediated protein complex assembly	7/1007	16/16374	2.28054e-05	0.00207477	0.00186972	HSPD1/PTGES3/CCT2/HSPA4/HSP90AA1/HSP90AB1/HSPA1A	7
GO:2000059	negative regulation of ubiquitin-dependent protein catabolic process	7/1007	16/16374	2.28054e-05	0.00207477	0.00186972	TAF1/RPL11/RPS7/RPL23/CSNK2A1/RPL5/PSEN1	7
GO:0051973	positive regulation of telomerase activity	10/1007	34/16374	2.49758e-05	0.00222173	0.00200215	CCT4/NAF1/PTGES3/CCT2/HSP90AA1/TNKS/CTNNB1/TCP1/MAP3K4/HSP90AB1	10
GO:0043066	negative regulation of apoptotic process	53/1007	481/16374	2.63706e-05	0.00229481	0.00206801	BIRC6/CD44/CRYAB/EGFR/NAA15/PRKDC/CHST11/MNAT1/HMGA2/NFKBIA/RPS6KA3/IGF1R/HSPD1/ANXA1/ZNF830/CDKN1A/WNK3/YME1L1/IFIT3/HSPA9/RAF1/ADAR/ANXA5/RPL10/ATG5/RPS6/TP53/UBB/SH3RF1/MDM4/PTMA/NPM1/MCL1/FLNA/TPT1/CTNNB1/DNAJA1/API5/GLO1/ZFAND6/KLHL20/PDPN/OPA1/BAG3/RPS27A/PCID2/RPS3A/RPS6KB1/HSPA1A/PSEN1/HSPB1/UBC/UBE2B	53
GO:0045727	positive regulation of translation	14/1007	65/16374	3.22808e-05	0.00271318	0.00244503	RPS27L/PABPC1/SOX4/VIM/RPL26/RBM3/LARP4B/NPM1/RPL5/NAT10/LARP4/RPS6KB1/SERP1/PRR16	14
GO:0006418	tRNA aminoacylation for protein translation	10/1007	35/16374	3.30519e-05	0.00271318	0.00244503	IARS/LARS/RARS/WARS/RARS2/FARSB/CARS/EPRS/SARS/YARS	10
GO:0000377	RNA splicing, via transesterification reactions with bulged adenosine as nucleophile	16/1007	82/16374	3.32116e-05	0.00271318	0.00244503	KHDRBS3/TGS1/SFSWAP/SNRPD3/SNRPD1/PRPF6/STRAP/HNRNPA2B1/METTL16/CLNS1A/YTHDC1/TXNL4A/NUP98/PRDX6/SCAF11/HSPA8	16
GO:0070498	interleukin-1-mediated signaling pathway	18/1007	100/16374	3.43281e-05	0.00274831	0.00247668	IL1R1/EGR1/IL1RAP/NFKBIA/PSME4/SKP1/PSMD1/MAP3K7/PSMD12/UBB/OTUD4/PSMA7/FBXW11/PSMB7/PSMD14/RPS27A/PSMD5/UBC	18
GO:0070199	establishment of protein localization to chromosome	6/1007	12/16374	3.5722e-05	0.00280383	0.00252672	CCT4/CCT2/CCT8/CCT5/CCT3/TCP1	6
GO:0042255	ribosome assembly	7/1007	17/16374	3.67129e-05	0.00282619	0.00254687	RPL11/MRTO4/RPS14/NPM1/RPL5/RPS19/FASTKD2	7
GO:0043161	proteasome-mediated ubiquitin-dependent protein catabolic process	31/1007	232/16374	3.78072e-05	0.00285552	0.00257329	MDM2/RNF216/PSME4/RAD23A/TAF1/RACK1/PSMD1/RPL11/UBE2D3/PSMD12/UBQLN1/RYBP/VCP/PCBP2/PSMA7/CTNNB1/FBXW11/PPP2CB/KLHL20/PSMB7/KLHL42/USP14/PSMD14/FBXO22/PSMD5/HSP90AB1/HSPA1A/SDCBP/PSEN1/RNF4/UBE2B	31
GO:0042026	protein refolding	7/1007	18/16374	5.68924e-05	0.00399544	0.00360056	HSPA6/HSPD1/HSP90AA1/ST13/DNAJA4/HSPA1A/HSPA8	7
GO:0042274	ribosomal small subunit biogenesis	7/1007	18/16374	5.68924e-05	0.00399544	0.00360056	RPS15/RPS24/RPS6/RPS7/RPS14/RPS16/RPS19	7
GO:0090670	RNA localization to Cajal body	7/1007	18/16374	5.68924e-05	0.00399544	0.00360056	CCT4/NAF1/CCT2/CCT8/CCT5/CCT3/TCP1	7
GO:0090672	telomerase RNA localization	7/1007	18/16374	5.68924e-05	0.00399544	0.00360056	CCT4/NAF1/CCT2/CCT8/CCT5/CCT3/TCP1	7
GO:0030163	protein catabolic process	29/1007	217/16374	6.63259e-05	0.00457763	0.0041252	EGFR/SERPINE2/TRIM24/MDM2/ODC1/EEF1A1/UBXN2A/PSMD1/SNX1/HSP90AA1/UBB/LGMN/XPO1/MDM4/FBXW7/VCP/FLNA/CSNK2A1/MARCH7/SF3B3/USP14/CAPN2/PSMD14/RDX/ATG4B/HSP90AB1/LONP1/SNX3/HSPA8	29
GO:0000209	protein polyubiquitination	29/1007	219/16374	7.83587e-05	0.00531644	0.00479099	SPSB1/MARCH1/CBFB/TRIM44/FBXO32/PSME4/SKP1/TAF1/PSMD1/UBE2D3/PSMD12/UBB/UBE3C/TNKS/FBXW7/PSMA7/CTNNB1/FBXW11/MARCH7/PSMB7/KLHL42/PSMD14/RPS27A/ARIH2/FBXO22/PSMD5/TPP2/UBC/UBE2B	29
GO:0051168	nuclear export	11/1007	46/16374	8.19975e-05	0.0054706	0.00492992	MDM2/TXN/LSG1/TP53/NEMF/CPSF6/CTDSPL2/NUP153/XPO4/TPR/BAG3	11
GO:0090671	telomerase RNA localization to Cajal body	7/1007	19/16374	8.53109e-05	0.00559835	0.00504504	CCT4/NAF1/CCT2/CCT8/CCT5/CCT3/TCP1	7
GO:0016579	protein deubiquitination	31/1007	244/16374	9.88959e-05	0.00638517	0.0057541	MDM2/USP36/NFKBIA/PSME4/RAD23A/PSMD1/MAP3K7/FOXK2/TP53/PSMD12/UBB/OTUD4/EIF3F/USP15/MDM4/VCP/USP16/PSMA7/TRAF3/CYLD/PSMB7/USP14/PSMD14/USP9X/STAM/RPS27A/PSMD5/USP3/USP38/SNX3/UBC	31
GO:0019941	modification-dependent protein catabolic process	10/1007	41/16374	0.00014408	0.00915482	0.00825002	TAF1/RPL11/RPS7/FBXW7/RPL23/CSNK2A1/RPL5/UBE3A/USP9X/PSEN1	10
GO:0045184	establishment of protein localization	13/1007	66/16374	0.000161499	0.0101013	0.00910292	KPNB1/MDM2/MCC/VCP/CORO1C/FLNA/DNAJA1/SCFD1/GAPVD1/RDX/CEP290/SNX3/LIMS1	13
GO:0090084	negative regulation of inclusion body assembly	5/1007	10/16374	0.000169191	0.0103854	0.00935899	HSF1/DNAJB6/DNAJB1/DNAJA4/HSPA1A	5
GO:0006406	mRNA export from nucleus	17/1007	103/16374	0.000171231	0.0103854	0.00935899	SMG6/IWS1/NUP107/RBM8A/NUP160/NUP214/RANBP2/AGFG1/HNRNPA2B1/NUP58/NUP153/YTHDC1/SLBP/NUP98/TPR/THOC2/THOC1	17
GO:0007179	transforming growth factor beta receptor signaling pathway	23/1007	166/16374	0.000213278	0.0127425	0.0114832	ACVR1/CHST11/ADAM17/TGFBR2/ITGA3/STRAP/MAP3K7/TP53/SMAD5/UBB/USP15/USP9X/NLK/RPS27A/ZNF451/ADAM9/TRIM33/HSP90AB1/HSPA1A/SDCBP/UBC/SNX25/TGFB2	23
GO:0016055	Wnt signaling pathway	44/1007	410/16374	0.000226384	0.0133267	0.0120095	EGFR/DRAXIN/DIXDC1/CBFB/SULF2/EGR1/TIAM1/MCC/G3BP1/ITGA3/PSME4/SOX4/CCNY/AMOTL1/SKP1/RAPGEF1/MBD2/RACK1/PSMD1/SMARCA4/PTPRO/WWTR1/PSMD12/UBB/IFT20/DAPK3/TNKS/VCP/RUNX1/PSMA7/CSNK2A1/CTNNB1/FBXW11/CYLD/PSMB7/PSMD14/OTULIN/NLK/RPS27A/PSMD5/SNX3/PSEN1/UBC/UBE2B	44
GO:0072717	cellular response to actinomycin D	3/1007	3/16374	0.000231958	0.0134569	0.0121269	MDM2/TP53/RPL23	3
GO:0043631	RNA polyadenylation	6/1007	16/16374	0.000250077	0.0140243	0.0126382	HSF1/TENT2/PNPT1/CCNT1/PAPOLA/NUDT21	6
GO:0070200	establishment of protein localization to telomere	6/1007	16/16374	0.000250077	0.0140243	0.0126382	CCT4/CCT2/CCT8/CCT5/CCT3/TCP1	6
GO:0071363	cellular response to growth factor stimulus	33/1007	280/16374	0.000252248	0.0140243	0.0126382	ACVR1/EGR1/ANGPT2/DDX5/MDM2/TGFBR2/RAPGEF1/RACK1/HNRNPM/MAP3K7/POLR2F/TP53/UBE2D3/SMAD5/POLR2B/UBB/USP15/CTNNB1/POLR2A/HNRNPF/NRP2/USP9X/GTF2F2/NLK/RPS27A/ADAM9/URI1/RPS6KB1/SLIT2/UBC/ACVR2A/TGFB2/SPRED1	33
GO:0009048	dosage compensation by inactivation of X chromosome	5/1007	11/16374	0.00029448	0.0159536	0.0143769	SMCHD1/HNRNPU/LRIF1/EIF1/YTHDC1	5
GO:0006368	transcription elongation from RNA polymerase II promoter	14/1007	79/16374	0.000294921	0.0159536	0.0143769	ELL2/HNRNPU/IWS1/MNAT1/POLR2F/POLR2B/CCNT1/POLR2A/RNF168/GTF2F2/ELP2/CCNH/EZH2/EAPP	14
GO:0002183	cytoplasmic translational initiation	7/1007	23/16374	0.000334093	0.0177481	0.015994	EIF3B/EIF3H/YTHDF2/EIF3F/EIF3J/EIF5/EIF3A	7
GO:0071427	mRNA-containing ribonucleoprotein complex export from nucleus	16/1007	99/16374	0.000336961	0.0177481	0.015994	SMG6/NUP107/RBM8A/NUP160/NUP214/RANBP2/AGFG1/HNRNPA2B1/NUP58/NUP153/YTHDC1/SLBP/NUP98/TPR/THOC2/THOC1	16
GO:0002244	hematopoietic progenitor cell differentiation	19/1007	130/16374	0.000372037	0.0193411	0.0174295	DHX36/CDK6/CBFB/SIPA1L3/PSME4/HSPA9/PSMD1/ADAR/YTHDF2/TP53/PSMD12/TENT2/RUNX1/PSMA7/PSMB7/PSMD14/PSMD5/PSEN1/KITLG	19
GO:0070555	response to interleukin-1	18/1007	120/16374	0.000380912	0.0195486	0.0176166	CHI3L1/IL1R1/EGR1/IL1RAP/NFKBIA/PSME4/SKP1/PSMD1/MAP3K7/PSMD12/UBB/PSMA7/FBXW11/PSMB7/PSMD14/RPS27A/PSMD5/UBC	18
GO:0006446	regulation of translational initiation	7/1007	24/16374	0.000446814	0.0226404	0.0204028	EIF3B/EIF5B/EIF3H/EIF4B/EIF1/EIF5/HSPB1	7
GO:0045943	positive regulation of transcription by RNA polymerase I	5/1007	12/16374	0.000479307	0.0237821	0.0214316	WDR43/HEATR1/TAF1/ATF4/EIF2AK3	5
GO:0000186	activation of MAPKK activity	9/1007	39/16374	0.000481227	0.0237821	0.0214316	EGFR/RAPGEF1/MAP3K20/RAF1/MAP3K7/CRK/MAP3K4/ADAM9/PSEN1	9
GO:0060218	hematopoietic stem cell differentiation	14/1007	83/16374	0.00049872	0.024346	0.0219398	CDK6/CBFB/PSME4/HSPA9/PSMD1/YTHDF2/TP53/PSMD12/RUNX1/PSMA7/CHD2/PSMB7/PSMD14/PSMD5	14
GO:0030330	DNA damage response, signal transduction by p53 class mediator	10/1007	48/16374	0.000568121	0.0273999	0.0246918	CD44/DDX5/MDM2/RPL26/TP53/MDM4/ATR/MARCH7/KDM1A/SPRED1	10
GO:0006396	RNA processing	16/1007	105/16374	0.000660684	0.031096	0.0280226	HNRNPU/SNHG7/IWS1/ZFC3H1/XRN2/HNRNPL/FUS/NOVA1/RNGTT/RBM3/POLR2A/HNRNPF/THOC1/RPS13/HSPA1A/TMTC1	16
GO:0006370	7-methylguanosine mRNA capping	8/1007	33/16374	0.000694734	0.031096	0.0280226	MNAT1/RNMT/POLR2F/POLR2B/RNGTT/POLR2A/GTF2F2/CCNH	8
GO:0006409	tRNA export from nucleus	8/1007	33/16374	0.000694734	0.031096	0.0280226	NUP107/NUP160/NUP214/RANBP2/NUP58/NUP153/NUP98/TPR	8
GO:0071431	tRNA-containing ribonucleoprotein complex export from nucleus	8/1007	33/16374	0.000694734	0.031096	0.0280226	NUP107/NUP160/NUP214/RANBP2/NUP58/NUP153/NUP98/TPR	8
GO:1901998	toxin transport	8/1007	33/16374	0.000694734	0.031096	0.0280226	CCT4/CCT2/CCT8/CCT5/CCT3/TCP1/SCFD1/COPB2	8
GO:0006110	regulation of glycolytic process	9/1007	41/16374	0.000712193	0.031096	0.0280226	NUP107/NUP160/NUP214/RANBP2/NUP58/NUP153/NUP98/TPR/ECD	9
GO:0006928	movement of cell or subcellular component	14/1007	86/16374	0.000721046	0.031096	0.0280226	EGFR/CDK6/ADAM17/ACTN4/ABL2/ROCK2/RAF1/DAPK3/NTN1/CRK/PDPN/NRP2/FRMD5/RPS19	14
GO:0003171	atrioventricular valve development	6/1007	19/16374	0.00072244	0.031096	0.0280226	ACVR1/MDM2/TGFBR2/SOX4/MDM4/TGFB2	6
GO:0070987	error-free translesion synthesis	6/1007	19/16374	0.00072244	0.031096	0.0280226	UBB/RFC3/VCP/NPLOC4/RPS27A/UBC	6
GO:0097062	dendritic spine maintenance	6/1007	19/16374	0.00072244	0.031096	0.0280226	CTTN/ITGA3/IGF1R/MTMR2/GRIN2B/ZNF804A	6
GO:0051085	chaperone cofactor-dependent protein refolding	5/1007	13/16374	0.00073957	0.0314947	0.0283819	HSPH1/DNAJC7/PTGES3/DNAJB1/GAK	5
GO:0035194	post-transcriptional gene silencing by RNA	17/1007	117/16374	0.000793808	0.0331147	0.0298418	NUP107/NUP160/NUP214/ADAR/RANBP2/POLR2F/NUP58/PUM2/POLR2B/PUM1/NUP153/FXR1/XPO5/POLR2A/NUP98/TPR/NEAT1	17
GO:0036294	cellular response to decreased oxygen levels	14/1007	87/16374	0.00081167	0.0331147	0.0298418	EGR1/PSME4/ROCK2/PSMD1/TP53/PSMD12/UBB/BACH1/PSMA7/PSMB7/PSMD14/RPS27A/PSMD5/UBC	14
GO:0000027	ribosomal large subunit assembly	4/1007	8/16374	0.000814969	0.0331147	0.0298418	RPL11/MRTO4/RPL38/RPL5	4
GO:0038061	NIK/NF-kappaB signaling	21/1007	160/16374	0.000815804	0.0331147	0.0298418	CHI3L1/EGFR/TRIM44/TMSB4X/NFKBIA/ACTN4/PSME4/SKP1/PSMD1/MAP3K7/PSMD12/COPS8/PSMA7/TNFRSF10B/FBXW11/RPS3/CYLD/PSMB7/PSMD14/PSMD5/LIMS1	21
GO:0071559	response to transforming growth factor beta	15/1007	97/16374	0.000823162	0.0331147	0.0298418	ACVR1/TGFBR2/ROCK2/MAP3K7/TP53/SMAD5/UBB/USP15/USP9X/NLK/RPS27A/ADAM9/ZFHX3/UBC/TGFB2	15
GO:0048144	fibroblast proliferation	13/1007	78/16374	0.000879439	0.0331147	0.0298418	EGFR/CDK6/S100A6/PRKDC/FTH1/CDKN1A/TP53/WAPL/CTNNB1/MORC3/PAWR/PDGFC/DDR2	13
GO:0006367	transcription initiation from RNA polymerase II promoter	22/1007	172/16374	0.000880487	0.0331147	0.0298418	DHX36/CBFB/MED6/MNAT1/TAF1/CDKN1A/POLR2F/TP53/WWTR1/POLR2B/TAF7/TAF15/POLR2A/MED10/MED4/CDK8/GTF2F2/ZNF451/TAF2/CCNH/TEAD1/TAF3	22
GO:0000028	ribosomal small subunit assembly	3/1007	4/16374	0.000885154	0.0331147	0.0298418	RPL38/RPS14/RPS19	3
GO:0003274	endocardial cushion fusion	3/1007	4/16374	0.000885154	0.0331147	0.0298418	ACVR1/TGFBR2/TGFB2	3
GO:0006610	ribosomal protein import into nucleus	3/1007	4/16374	0.000885154	0.0331147	0.0298418	KPNB1/IPO5/RPL23	3
GO:0097201	negative regulation of transcription from RNA polymerase II promoter in response to stress	3/1007	4/16374	0.000885154	0.0331147	0.0298418	DNAJB1/BAG3/HSPA1A	3
GO:0110104	mRNA alternative polyadenylation	3/1007	4/16374	0.000885154	0.0331147	0.0298418	CPSF6/VIRMA/NUDT21	3
GO:1902255	positive regulation of intrinsic apoptotic signaling pathway by p53 class mediator	3/1007	4/16374	0.000885154	0.0331147	0.0298418	RPL11/UBB/RPS7	3
GO:0006511	ubiquitin-dependent protein catabolic process	35/1007	325/16374	0.000896445	0.0332266	0.0299427	SPSB1/MDM2/UBE2I/USP36/RAD23A/TAF1/RACK1/RPL11/ARIH1/RPS7/RYBP/USP15/FBXW7/VCP/USP16/ANAPC1/RPL23/NPLOC4/CSNK2A1/RPL5/UBE3A/CYLD/USP14/RNF168/PSMD14/USP9X/ARIH2/FBXO22/HSP90AB1/USP3/USP38/HSPA1A/SDCBP/PSEN1/UBE2B	35
GO:0044770	cell cycle phase transition	17/1007	119/16374	0.000964218	0.0354107	0.0319109	PSME4/SKP1/TAF1/PSMD1/TP53/PSMD12/FBXW7/ANAPC1/NEK10/NPM1/PSMA7/SLBP/PSMB7/PSMD14/PSMD5/EZH2/XPC	17
GO:0046827	positive regulation of protein export from nucleus	6/1007	20/16374	0.000978782	0.0356188	0.0320984	MDM2/TP53/CTDSPL2/XPO4/TPR/BAG3	6
GO:0035195	gene silencing by miRNA	18/1007	130/16374	0.00100561	0.0362654	0.0326811	NUP107/NUP160/NUP214/ADAR/RANBP2/POLR2F/NUP58/PUM2/POLR2B/PUM1/NUP153/FXR1/XPO5/POLR2A/NUP98/TPR/NEAT1/MIR34AHG	18
GO:0035196	production of miRNAs involved in gene silencing by miRNA	9/1007	43/16374	0.00102639	0.0366841	0.0330585	EGFR/DDX5/ADAR/HNRNPA2B1/TP53/PUM2/NCOR2/PUM1/TUT7	9
GO:0001732	formation of cytoplasmic translation initiation complex	5/1007	14/16374	0.00109248	0.0381435	0.0343736	EIF3B/EIF3H/EIF3F/EIF3J/EIF3A	5
GO:0090307	mitotic spindle assembly	10/1007	52/16374	0.00109935	0.0381435	0.0343736	BCCIP/HNRNPU/KPNB1/ZNF207/PIBF1/FLNA/CEP192/TPR/KIF2A/HSPA1A	10
GO:0009057	macromolecule catabolic process	16/1007	110/16374	0.00110533	0.0381435	0.0343736	EGFR/SERPINE2/MDM2/ODC1/UBXN2A/PSMD1/SNX1/MTMR2/XPO1/MDM4/VCP/FLNA/CSNK2A1/SF3B3/ATG4B/SNX3	16
GO:1901565	organonitrogen compound catabolic process	16/1007	110/16374	0.00110533	0.0381435	0.0343736	EGFR/SERPINE2/MDM2/ODC1/UBXN2A/PSMD1/SNX1/XPO1/MDM4/VCP/LDLR/FLNA/CSNK2A1/SF3B3/ATG4B/SNX3	16
GO:0061418	regulation of transcription from RNA polymerase II promoter in response to hypoxia	12/1007	71/16374	0.00120892	0.0413614	0.0372735	EGR1/PSME4/PSMD1/PSMD12/UBB/BACH1/PSMA7/PSMB7/PSMD14/RPS27A/PSMD5/UBC	12
GO:0060964	regulation of gene silencing by miRNA	13/1007	81/16374	0.00126286	0.042841	0.0386069	NUP107/NUP160/NUP214/RANBP2/POLR2F/NUP58/PUM2/POLR2B/PUM1/NUP153/POLR2A/NUP98/TPR	13
GO:0065003	protein-containing complex assembly	26/1007	223/16374	0.0012804	0.043071	0.0388142	IL1RAP/MDM2/MNAT1/NIFK/ARHGEF2/SLC7A6/ICE1/MDN1/RAF1/TP53/HSP90AA1/PPID/MDM4/VCP/WARS/RPS3/LMO4/EPRS/DLG5/FARP2/SNX9/TEAD1/LAMC1/MPP6/FNIP2/HSPA8	26
GO:0015031	protein transport	41/1007	408/16374	0.00134472	0.0448577	0.0404243	AGAP1/VPS53/EHBP1/ARF1/MON2/AAGAB/ACTN4/SCFD2/LSG1/ICE1/LYST/RACK1/DGKD/COG5/TNKS/ADAMTS9/CCDC93/PPID/EXOC1/GOSR1/DNAJA1/UBAP1/SCFD1/KLHL20/PPIA/TPR/VTA1/GAPVD1/ATG4B/CEP290/ADAM9/PRR5L/SNX3/ACSL3/HIKESHI/SERP1/PSEN1/HSPA8/SNX25/TGFB2/CADPS	41
GO:0000082	G1/S transition of mitotic cell cycle	22/1007	178/16374	0.00138696	0.0455536	0.0410513	ACVR1/EGFR/CDK6/ADAM17/MNAT1/ITGB1/RBBP8/UBE2E2/CDKN1A/RPS6/BACH1/ORC3/RPTOR/ECD/POLA1/RDX/CCNH/EZH2/RPS6KB1/ORC4/TFDP2/MYO16	22
GO:1904667	negative regulation of ubiquitin protein ligase activity	4/1007	9/16374	0.00139565	0.0455536	0.0410513	RPL11/RPS7/RPL23/RPL5	4
GO:0044237	cellular metabolic process	17/1007	123/16374	0.00139972	0.0455536	0.0410513	CRYAB/EIF3B/EIF5B/EIF3H/TGFBR2/CDKN1A/ATG5/TP53/VDAC1/EIF4B/EIF1/EIF5/TPR/CDC123/RPS6KB1/DHX29/HSPB1	17
GO:0018105	peptidyl-serine phosphorylation	25/1007	213/16374	0.00143125	0.0460221	0.0414736	CAMK2D/CD44/EGFR/MAPKAP1/PRKDC/TGFBR2/RPS6KA3/TXN/TAF1/ROCK2/RACK1/RAF1/HSP90AA1/TNKS/PRKCE/RPTOR/ATR/CSNK2A1/MORC3/EIF2AK3/HSP90AB1/PLCL1/PAQR3/RPS6KB1/FNIP2	25
GO:0048863	stem cell differentiation	20/1007	156/16374	0.00143711	0.0460221	0.0414736	HNRNPU/DHX36/CDK6/CBFB/OCIAD1/HMGA2/PSME4/HSPA9/PSMD1/YTHDF2/PSMD12/PUM1/RUNX1/PSMA7/CDK13/PSMB7/PSMD14/NUDT21/PSMD5/TGFB2	20
GO:0000380	alternative mRNA splicing, via spliceosome	10/1007	54/16374	0.00148778	0.0472666	0.0425951	HNRNPU/DDX5/RBM8A/SFSWAP/HNRNPL/RBM25/HNRNPM/WTAP/CDK13/KDM1A	10
GO:0006283	transcription-coupled nucleotide-excision repair	12/1007	73/16374	0.00155093	0.0482934	0.0435204	MNAT1/ZNF830/POLR2F/POLR2B/UBB/RFC3/COPS8/POLR2A/RPS27A/CCNH/AQR/UBC	12
GO:0042769	DNA damage response, detection of DNA damage	8/1007	37/16374	0.0015526	0.0482934	0.0435204	HMGA2/SOX4/UBB/RFC3/RPS3/RPS27A/UBC/UBE2B	8
GO:0050658	RNA transport	5/1007	15/16374	0.0015563	0.0482934	0.0435204	RBFOX1/HNRNPA2B1/CPSF6/NUP153/TPR	5
GO:0006974	cellular response to DNA damage stimulus	33/1007	311/16374	0.00158588	0.048833	0.0440067	EGFR/SMCHD1/PRKDC/SMC5/HMGA2/BOD1L1/PSME4/UBE2E2/TAF1/PARG/CDKN1A/RBBP5/TP53/RFC3/WRN/VCP/USP16/ATR/CHD2/MCL1/TPT1/RPS3/APTX/THOC1/POLA1/RNF168/RIF1/EYA3/ZRANB3/ASCC3/PSEN1/ZBTB38/UBE2B	33
GO:0070925	organelle assembly	33/1007	312/16374	0.001672	0.0510162	0.045974	GAP43/RAB3IP/ITGB1/CDKL1/G3BP1/ARHGEF2/DYNLL1/RAB39A/RPL11/ATG5/MRTO4/HSP90AA1/IFT20/RPS14/TPM1/RPL5/SCFD1/CEP192/CYLD/TCTN3/ACTG1/CEP89/STAM/RDX/RPS19/CNOT2/CEP290/STX18/CEP83/SDCBP/FHOD3/VDAC3/RNF4	33
GO:0046580	negative regulation of Ras protein signal transduction	6/1007	22/16374	0.00169502	0.0510162	0.045974	MAPKAP1/RAPGEF1/RASA2/PPP2CB/EPHB2/TGFB2	6
GO:0061077	chaperone-mediated protein folding	6/1007	22/16374	0.00169502	0.0510162	0.045974	FKBP4/CHORDC1/PPID/CSNK2A1/TRAP1/HSPB1	6
GO:0019538	protein metabolic process	25/1007	216/16374	0.00174039	0.0519908	0.0468524	CRYAB/EGFR/SERPINE2/MDM2/ODC1/MMP16/NFKBIA/UBXN2A/ROCK2/PSMD1/SNX1/TP53/XPO1/MDM4/VCP/LDLR/FLNA/CSNK2A1/TRAF3/FBXW11/SF3B3/ATG4B/HSP90AB1/SNX3/PSEN1	25
GO:0003281	ventricular septum development	11/1007	65/16374	0.00188864	0.0560017	0.0504668	ACVR1/HECTD1/MDM2/TGFBR2/SOX4/DCTN5/MDM4/LMO4/SLIT2/ROBO1/TGFB2	11
GO:0072659	protein localization to plasma membrane	23/1007	195/16374	0.00203934	0.0560748	0.0505327	DPP6/EGFR/GPR158/RER1/S100A10/ITGB1/ITGA3/STAC/ROCK2/WNK3/NFASC/IFT20/SYTL2/PRKCE/ATP1B3/FAM126A/FLNA/KCNIP4/GAK/RDX/PPFIA1/FGF13/EPHB2	23
GO:0006281	DNA repair	32/1007	304/16374	0.00210396	0.0560748	0.0505327	EGFR/SMCHD1/BCCIP/HSF1/MNAT1/RBBP8/BOD1L1/PSME4/MBD4/UBE2D3/UBB/MUS81/RFC3/WRN/BACH1/COPS8/VCP/NPM1/ATR/RPS3/POLA1/RNF168/RPS27A/MORF4L2/CCNH/XPC/USP3/EYA3/ZRANB3/ASCC3/UBC/UBE2B	32
GO:0003289	atrial septum primum morphogenesis	3/1007	5/16374	0.00211142	0.0560748	0.0505327	ACVR1/SOX4/TGFB2	3
GO:0007000	nucleolus organization	3/1007	5/16374	0.00211142	0.0560748	0.0505327	USP36/RRN3/RPS19	3
GO:0007021	tubulin complex assembly	3/1007	5/16374	0.00211142	0.0560748	0.0505327	CRYAB/TBCA/TCP1	3
GO:0090666	scaRNA localization to Cajal body	3/1007	5/16374	0.00211142	0.0560748	0.0505327	CCT4/CCT2/TCP1	3
GO:1904358	positive regulation of telomere maintenance via telomere lengthening	3/1007	5/16374	0.00211142	0.0560748	0.0505327	DHX36/NAF1/HNRNPA2B1	3
GO:1905007	positive regulation of epithelial to mesenchymal transition involved in endocardial cushion formation	3/1007	5/16374	0.00211142	0.0560748	0.0505327	ACVR1/TGFBR2/TGFB2	3
GO:0030512	negative regulation of transforming growth factor beta receptor signaling pathway	11/1007	66/16374	0.00214305	0.0560748	0.0505327	CHST11/ADAM17/TGFBR2/STRAP/TP53/UBB/RPS27A/ZNF451/HSPA1A/UBC/SNX25	11
GO:0032446	protein modification by small protein conjugation	19/1007	150/16374	0.00214864	0.0560748	0.0505327	EGR1/GTPBP4/SOX4/UBXN2A/RPL11/ATG5/HSP90AA1/GNL3/UBB/UBQLN1/FBXW7/PRKCE/CTNNB1/RPL5/DNAJA1/RPS3/UBE3A/HSP90AB1/HSPA1A	19
GO:0071347	cellular response to interleukin-1	19/1007	150/16374	0.00214864	0.0560748	0.0505327	CHI3L1/IL1R1/EGR1/IL1RAP/GBP2/NFKBIA/PSME4/SKP1/PSMD1/MAP3K7/PSMD12/UBB/PSMA7/FBXW11/PSMB7/PSMD14/RPS27A/PSMD5/UBC	19
GO:0016072	rRNA metabolic process	5/1007	16/16374	0.00215003	0.0560748	0.0505327	WDR43/BUD23/USP36/NIFK/HEATR1	5
GO:0031396	regulation of protein ubiquitination	5/1007	16/16374	0.00215003	0.0560748	0.0505327	UBXN2A/HSP90AA1/UBQLN1/HSP90AB1/HSPA1A	5
GO:0042176	regulation of protein catabolic process	5/1007	16/16374	0.00215003	0.0560748	0.0505327	MDM2/ODC1/UBXN2A/PSMD1/XPO1	5
GO:0070841	inclusion body assembly	5/1007	16/16374	0.00215003	0.0560748	0.0505327	HSF1/DNAJB6/DNAJB1/DNAJA4/HSPA1A	5
GO:0006606	protein import into nucleus	14/1007	96/16374	0.00215116	0.0560748	0.0505327	KPNB1/NFKBIA/IPO5/CDKN1A/TP53/NUP58/TNPO3/FLNA/TPR/MBTPS1/BAG3/RANBP17/HIKESHI/PSEN1	14
GO:0000726	non-recombinational repair	6/1007	23/16374	0.00217534	0.0560748	0.0505327	SMCHD1/PRKDC/HSF1/HMGA2/CYREN/RIF1	6
GO:0034446	substrate adhesion-dependent cell spreading	13/1007	86/16374	0.00220603	0.0560748	0.0505327	S100A10/ACTN4/PEAK1/CRK/CORO1C/FLNA/ARHGEF7/ANTXR1/PDPN/ARPC2/SRGAP2/LAMC1/LIMS1	13
GO:0060041	retina development in camera-type eye	13/1007	86/16374	0.00220603	0.0560748	0.0505327	MAN2A1/XRN2/CHD7/GNB1/DLL1/SMARCA4/ATP2B1/RPL24/TENT2/OPA1/NECTIN3/PSEN1/TGFB2	13
GO:0034244	negative regulation of transcription elongation from RNA polymerase II promoter	4/1007	10/16374	0.00221329	0.0560748	0.0505327	HNRNPU/RNF168/EZH2/EAPP	4
GO:0045793	positive regulation of cell size	4/1007	10/16374	0.00221329	0.0560748	0.0505327	RB1CC1/KDM1A/HSP90AB1/PRR16	4
GO:0051272	positive regulation of cellular component movement	4/1007	10/16374	0.00221329	0.0560748	0.0505327	ADAM17/ACTN4/PDPN/RPS19	4
GO:0075522	IRES-dependent viral translational initiation	4/1007	10/16374	0.00221329	0.0560748	0.0505327	EIF3B/EIF3F/PCBP2/EIF3A	4
GO:0006259	DNA metabolic process	20/1007	162/16374	0.00226867	0.0571163	0.0514713	EGFR/SMCHD1/DHX36/SMG6/KPNA1/CDKN1A/GNL3/DNAJC2/RFC3/WRN/NUCKS1/RPS3/THOC1/POLA1/RNF168/ZNF365/EYA3/ZRANB3/ASCC3/PAK3	20
GO:0060485	mesenchyme development	7/1007	31/16374	0.00232797	0.0582428	0.0524865	ACVR1/MDM2/HMGA2/BNC2/WWTR1/MDM4/TGFB2	7
GO:0007265	Ras protein signal transduction	27/1007	246/16374	0.0025226	0.0627202	0.0565213	MAPKAP1/TIAM1/ITGB1/G3BP1/ITGA3/ARHGEF2/RAPGEF1/ABL2/CDKN1A/MYO9B/RAF1/GNB1/TP53/RRAS2/NTN1/CRK/RASA2/PPP2CB/ARHGEF7/RDX/DNMBP/FARP2/DGKI/EPHB2/KITLG/ROBO1/TGFB2	27
GO:0042770	signal transduction in response to DNA damage	8/1007	40/16374	0.0026265	0.0649004	0.0584861	CD44/DDX5/MDM2/TP53/ATR/MARCH7/KDM1A/SPRED1	8
GO:0097193	intrinsic apoptotic signaling pathway	19/1007	153/16374	0.00269745	0.0662447	0.0596975	MDM2/ARHGEF2/CDKN1A/RRN3/RACK1/RPL11/TP53/UBB/UBQLN1/RPS7/TPT1/DNAJA1/RPS3/CYLD/OPA1/EIF2AK3/URI1/HSPA1A/HSPB1	19
GO:1902036	regulation of hematopoietic stem cell differentiation	11/1007	68/16374	0.0027353	0.0663514	0.0597936	CDK6/CBFB/PSME4/PSMD1/YTHDF2/PSMD12/RUNX1/PSMA7/PSMB7/PSMD14/PSMD5	11
GO:0003203	endocardial cushion morphogenesis	6/1007	24/16374	0.00275152	0.0663514	0.0597936	ACVR1/MDM2/TGFBR2/MDM4/ROBO1/TGFB2	6
GO:0072006	nephron development	6/1007	24/16374	0.00275152	0.0663514	0.0597936	NUP107/NUP160/ITGA3/DLL1/PTPRO/WWTR1	6
GO:1901796	regulation of signal transduction by p53 class mediator	17/1007	131/16374	0.00277852	0.0666012	0.0600188	TRIM24/MDM2/RBBP8/TAF1/RBBP4/RPL11/TP53/RFC3/TAF7/WRN/TAF15/MDM4/ATR/CSNK2A1/RPL5/TAF2/TAF3	17
GO:0072673	lamellipodium morphogenesis	5/1007	17/16374	0.00289319	0.0689371	0.0621238	CD44/SNX1/CORO1C/ARHGEF7/PDPN	5
GO:0043547	positive regulation of GTPase activity	31/1007	298/16374	0.00293227	0.0694549	0.0625904	RGS17/ARHGAP10/AGAP1/LARS/S100A10/SIPA1L3/SIPA1L2/ITGB1/ARHGAP24/DOCK10/ARFGAP3/RAPGEF1/RASGEF1B/MYO9B/RACK1/RANBP2/AGFG1/SRGAP1/RASA2/RIC8B/ARHGEF7/GAPVD1/ARHGAP21/ZC3H15/MUT/EZH2/RGS6/SNX9/SRGAP2/LIMS1/RASAL2	31
GO:0060996	dendritic spine development	10/1007	59/16374	0.00295915	0.0696792	0.0627925	ARF1/DOCK10/ACSL4/ZNF365/SRGAP2C/DLG5/SRGAP2/PSEN1/PAK3/EPHB2	10
GO:0007569	cell aging	11/1007	69/16374	0.00307733	0.0712056	0.0641681	CDK6/PRKDC/HMGA2/TP53/WRN/PNPT1/NAMPT/NPM1/MORC3/PAWR/LIMS1	11
GO:0031146	SCF-dependent proteasomal ubiquitin-dependent protein catabolic process	11/1007	69/16374	0.00307733	0.0712056	0.0641681	PSME4/SKP1/PSMD1/WWTR1/PSMD12/FBXW7/PSMA7/FBXW11/PSMB7/PSMD14/PSMD5	11
GO:1901564	organonitrogen compound metabolic process	11/1007	69/16374	0.00307733	0.0712056	0.0641681	ODC1/PSME4/ROCK2/PSMD1/PSMD12/LDLR/PSMA7/PSMB7/PSMD14/PSMD5/HSP90AB1	11
GO:0000904	cell morphogenesis involved in differentiation	20/1007	167/16374	0.00324212	0.0745874	0.0672157	TRAK2/NRCAM/S100A6/HPRT1/MEF2A/S100A10/ITGB1/ACTN4/DSCAM/CRK/CORO1C/DSCAML1/FLNA/CTNNB1/ARHGEF7/PDPN/ARPC2/PITPNA/PAK3/LIMS1	20
GO:0010763	positive regulation of fibroblast migration	4/1007	11/16374	0.00330976	0.0752782	0.0678382	PRKCE/ARHGEF7/PAK3/DDR2	4
GO:0035457	cellular response to interferon-alpha	4/1007	11/16374	0.00330976	0.0752782	0.0678382	IFIT2/IFIT3/TROVE2/TPR	4
GO:0003279	cardiac septum development	10/1007	60/16374	0.00335957	0.0759795	0.0684702	ACVR1/MDM2/TGFBR2/SOX4/CHD7/TP53/ADAMTS6/SLIT2/ROBO1/TGFB2	10
GO:0051028	mRNA transport	8/1007	42/16374	0.00361596	0.0813185	0.0732815	HNRNPA3/IWS1/HSF1/LRPPRC/XPO1/TNKS/SLBP/RANBP17	8
GO:0018107	peptidyl-threonine phosphorylation	13/1007	91/16374	0.00366377	0.0819334	0.0738356	CHI3L1/CAMK2D/ACVR1/TGFBR2/TAF1/ROCK2/WNK3/TNKS/RPTOR/CSNK2A1/NLK/CEMIP/SPRED1	13
GO:0010498	proteasomal protein catabolic process	20/1007	169/16374	0.00371885	0.0827031	0.0745293	MDM2/RAD23A/TAF1/RACK1/RPL11/UBB/FAF2/RYBP/FBXW7/VCP/NPLOC4/MARCH7/USP14/PSMD14/FBXO22/SOCS6/HSP90AB1/HSPA1A/SDCBP/PSEN1	20
GO:0003181	atrioventricular valve morphogenesis	5/1007	18/16374	0.00380548	0.0840182	0.0757144	ACVR1/MDM2/TGFBR2/MDM4/TGFB2	5
GO:0051301	cell division	40/1007	419/16374	0.00382999	0.0840182	0.0757144	BIRC6/HNRNPU/CDK6/NUDC/ENSA/UBE2I/NSUN2/SMC5/RBBP8/HMGA2/SENP5/CCNY/ZNF207/ZNF830/RACK1/DLL1/TNKS/PRPF40A/PRKCE/USP16/ANAPC1/VRK1/NSL1/WAPL/PPP2R2D/CCNG2/YBX1/CCNT1/RPS3/TXNL4A/TPR/KLHL42/USP9X/CDC123/KIF2A/ITGB3BP/PPP1CB/PDGFC/TGFB2/GAREM1	40
GO:0006302	double-strand break repair	16/1007	124/16374	0.00386022	0.0840182	0.0757144	SMCHD1/PRKDC/HSF1/RBBP8/HMGA2/FUS/TP53/WRN/VCP/CYREN/RNF168/ZNF365/RIF1/KDM1A/EYA3/TENT4A	16
GO:0003284	septum primum development	3/1007	6/16374	0.00402985	0.0840182	0.0757144	ACVR1/SOX4/TGFB2	3
GO:0006607	NLS-bearing protein import into nucleus	3/1007	6/16374	0.00402985	0.0840182	0.0757144	IPO5/RANBP2/CBLB	3
GO:0009299	mRNA transcription	3/1007	6/16374	0.00402985	0.0840182	0.0757144	DDX5/HSF1/TP53	3
GO:0051223	regulation of protein transport	3/1007	6/16374	0.00402985	0.0840182	0.0757144	DNAJA1/SCFD1/GAPVD1	3
GO:0070257	positive regulation of mucus secretion	3/1007	6/16374	0.00402985	0.0840182	0.0757144	ATG5/SYTL2/PRKCE	3
GO:1901185	negative regulation of ERBB signaling pathway	3/1007	6/16374	0.00402985	0.0840182	0.0757144	EGFR/LGMN/PTPN12	3
GO:1902949	positive regulation of tau-protein kinase activity	3/1007	6/16374	0.00402985	0.0840182	0.0757144	EGR1/HSP90AA1/HSP90AB1	3
GO:1903026	negative regulation of RNA polymerase II regulatory region sequence-specific DNA binding	3/1007	6/16374	0.00402985	0.0840182	0.0757144	TMSB4X/TAF1/FBXW7	3
GO:2001033	negative regulation of double-strand break repair via nonhomologous end joining	3/1007	6/16374	0.00402985	0.0840182	0.0757144	HSF1/HMGA2/CYREN	3
GO:0042771	intrinsic apoptotic signaling pathway in response to DNA damage by p53 class mediator	8/1007	43/16374	0.00420786	0.0865007	0.0779515	CD44/RPS27L/CDKN1A/RPL26/TP53/MARCH7/KDM1A/IFI16	8
GO:0097581	lamellipodium organization	8/1007	43/16374	0.00420786	0.0865007	0.0779515	CD44/CTTN/BIN3/CORO1C/ARHGEF7/PDPN/ARPC2/SLIT2	8
GO:0044706	multi-multicellular organism process	12/1007	82/16374	0.00421375	0.0865007	0.0779515	VMP1/SERPINE2/FKBP4/ANGPT2/HSF1/TGFBR2/ITGA3/SPP1/ACSL4/KPNA6/RPL29/ACVR2A	12
GO:0014002	astrocyte development	6/1007	26/16374	0.00423652	0.0865245	0.077973	BACE2/EGFR/CDK6/DLL1/VIM/PSEN1	6
GO:0090398	cellular senescence	10/1007	62/16374	0.00428902	0.087152	0.0785384	CDK6/PRKDC/SMC5/HMGA2/CDKN1A/TP53/PNPT1/NAMPT/OPA1/PAWR	10
GO:0007178	transmembrane receptor protein serine/threonine kinase signaling pathway	23/1007	207/16374	0.00434918	0.0879281	0.0792379	ACVR1/CHST11/ADAM17/TGFBR2/ITGA3/STRAP/VIM/TP53/SMAD5/UBB/USP15/CTDSPL2/SUB1/RPS27A/ZNF451/TRIM33/HSP90AB1/HSPA1A/SDCBP/UBC/SNX25/ACVR2A/TGFB2	23
GO:0044843	cell cycle G1/S phase transition	15/1007	115/16374	0.0045651	0.0918297	0.0827538	EGFR/CDK6/ADAM17/UBE2E2/TAF1/CDKN1A/BACH1/FBXW7/RPTOR/ECD/POLA1/RDX/EZH2/TFDP2/MYO16	15
GO:0000086	G2/M transition of mitotic cell cycle	23/1007	208/16374	0.00461417	0.0923527	0.0832251	ENSA/MNAT1/PPME1/PSME4/CCNY/SKP1/CDKN1A/DYNLL1/PSMD1/HSP90AA1/PSMD12/BACH1/PSMA7/FBXW11/CEP192/PSMB7/PSMD14/TAF2/PPP2R2A/PSMD5/CCNH/CEP290/PPP1CB	23
GO:0006361	transcription initiation from RNA polymerase I promoter	7/1007	35/16374	0.00480515	0.0956966	0.0862386	TAF1D/MNAT1/RRN3/POLR2F/SMARCA4/POLR1A/CCNH	7
GO:0061024	membrane organization	20/1007	173/16374	0.00484816	0.0960643	0.0865699	MYOF/EGFR/RER1/CTTN/SH3KBP1/AGFG1/UBB/HIP1/LDLR/YWHAB/ACTG1/GAK/GAPVD1/STAM/RPS27A/ETV5/ARPC2/SNX9/UBC/HSPA8	20
GO:0010718	positive regulation of epithelial to mesenchymal transition	8/1007	44/16374	0.00487161	0.0960643	0.0865699	TIAM1/TGFBR2/WWTR1/CTNNB1/PDPN/EZH2/SDCBP/TGFB2	8
GO:0019068	virion assembly	5/1007	19/16374	0.00490656	0.0962792	0.0867636	UBB/PPIA/VTA1/RPS27A/UBC	5
GO:0006289	nucleotide-excision repair	11/1007	74/16374	0.00533739	0.104222	0.0939217	MNAT1/RBBP8/RAD23A/TP53/UBB/RFC3/COPS8/RPS27A/CCNH/XPC/UBC	11
GO:0071456	cellular response to hypoxia	21/1007	187/16374	0.00553904	0.107635	0.0969968	HMOX1/EGR1/MDM2/PSME4/ROCK2/GNB1/PSMD1/TP53/PSMD12/UBB/UBQLN1/BACH1/MDM4/PRKCE/PSMA7/PSMB7/PSMD14/OPA1/RPS27A/PSMD5/UBC	21
GO:0031175	neuron projection development	42/1007	456/16374	0.005806	0.112277	0.101181	SPOCK1/EGFR/TRAK2/NRCAM/DHX36/FKBP4/S100A6/HPRT1/MEF2A/MDM2/TIAM1/ITGB1/CTTN/ITGA3/RAPGEF1/DSCAM/ABL2/RRN3/VIM/PRRX1/PTPRO/UBB/DGUOK/CRK/ACSL4/DSCAML1/UBE3A/TBC1D23/ZNF365/GAK/OPA1/KDM1A/EZH2/SNX3/SRGAP2/PITPNA/PAQR3/ZNF804A/CNTNAP2/PSEN1/PAK3/EPHB2	42
GO:0070936	protein K48-linked ubiquitination	9/1007	55/16374	0.00598368	0.115157	0.103776	TRIM44/RNF216/UBE2E2/UBE2D3/UBE2Q2/UBE3A/ARIH2/RNF4/UBE2B	9
GO:0043933	protein-containing complex subunit organization	10/1007	65/16374	0.00605038	0.115884	0.10443	IGF1R/ICE1/RAF1/HSP90AA1/VCP/WARS/RPS3/LMO4/FNIP2/HSPA8	10
GO:0022618	ribonucleoprotein complex assembly	5/1007	20/16374	0.00621582	0.117368	0.105768	KHDC4/RPL13A/SNRNP200/RPL38/YTHDC1	5
GO:0031123	RNA 3'-end processing	5/1007	20/16374	0.00621582	0.117368	0.105768	DHX36/CPSF6/PAPOLA/TUT7/NUDT21	5
GO:1902017	regulation of cilium assembly	5/1007	20/16374	0.00621582	0.117368	0.105768	CDKL1/ATG5/IFT20/CYLD/VDAC3	5
GO:0051457	maintenance of protein location in nucleus	4/1007	13/16374	0.00649628	0.121517	0.109507	HNRNPU/SKP1/MORC3/TAF3	4
GO:0080009	mRNA methylation	4/1007	13/16374	0.00649628	0.121517	0.109507	TRMT10C/METTL16/VIRMA/WTAP	4
GO:0006355	regulation of transcription, DNA-templated	38/1007	406/16374	0.00653103	0.121599	0.109581	TAF1D/ZNF146/JMJD1C/HMGA2/HES6/PRDM2/SOX4/SUPT3H/ZNF207/TAF1/LRIF1/CHD7/FUS/FUBP1/FOXK2/TP53/EDF1/WWTR1/ATF4/AFF3/RPL6/DAPK3/CREM/BACH1/ZRANB2/ZNF131/BLZF1/YBX1/ARNTL2/POLR2A/HINT1/NLK/EZH2/ZFHX3/MTERF1/ITGB3BP/ZNF274/GAS7	38
GO:0035385	Roundabout signaling pathway	3/1007	7/16374	0.00673098	0.12395	0.111699	MYO9B/SLIT2/ROBO1	3
GO:0044806	G-quadruplex DNA unwinding	3/1007	7/16374	0.00673098	0.12395	0.111699	DHX36/HNRNPA2B1/WRN	3
GO:0030521	androgen receptor signaling pathway	9/1007	56/16374	0.0067502	0.12395	0.111699	FKBP4/DDX5/GRIP1/SMARCA4/NRIP1/NCOR2/CTNNB1/UBE3A/RNF4	9
GO:0035722	interleukin-12-mediated signaling pathway	8/1007	47/16374	0.00734877	0.133109	0.119953	ARF1/ANXA2/HSPA9/HNRNPA2B1/TCP1/HNRNPF/PPIA/PITPNA	8
GO:0048146	positive regulation of fibroblast proliferation	8/1007	47/16374	0.00734877	0.133109	0.119953	EGFR/CDK6/S100A6/PRKDC/CDKN1A/WAPL/PDGFC/DDR2	8
GO:0060389	pathway-restricted SMAD protein phosphorylation	8/1007	47/16374	0.00734877	0.133109	0.119953	ACVR1/TGFBR2/STRAP/USP15/SDCBP/SNX25/ACVR2A/TGFB2	8
GO:0001667	ameboidal-type cell migration	12/1007	88/16374	0.00746575	0.133448	0.120259	TGFBR2/MCC/ITGA3/STRAP/PRKCE/CORO1C/ARHGEF7/PRR5L/SRGAP2/PAK3/DDR2/TGFB2	12
GO:0006294	nucleotide-excision repair, preincision complex assembly	6/1007	29/16374	0.00746903	0.133448	0.120259	MNAT1/UBB/RPS27A/CCNH/XPC/UBC	6
GO:2000145	regulation of cell motility	6/1007	29/16374	0.00746903	0.133448	0.120259	EGFR/CDK6/ABL2/ROCK2/RAF1/DAPK3	6
GO:0001666	response to hypoxia	24/1007	229/16374	0.00750081	0.133448	0.120259	CRYAB/EGR1/ANGPT2/ADAM17/TGFBR2/ACTN4/PSME4/ROCK2/RAF1/PSMD1/TP53/PSMD12/UBB/BACH1/PSMA7/SCFD1/PSMB7/CAPN2/PSMD14/RPS27A/PSMD5/LONP1/UBC/TGFB2	24
GO:0097061	dendritic spine organization	9/1007	57/16374	0.00758976	0.134433	0.121146	DHX36/ARF1/TIAM1/LGMN/GRIN2B/UBE3A/OPA1/ZNF804A/PAK3	9
GO:0070918	production of small RNA involved in gene silencing by RNA	7/1007	38/16374	0.0076845	0.13551	0.122117	EGFR/DDX5/ADAR/HNRNPA2B1/TP53/NCOR2/TUT7	7
GO:0003283	atrial septum development	5/1007	21/16374	0.00775212	0.13551	0.122117	ACVR1/MDM2/SOX4/MDM4/TGFB2	5
GO:0031290	retinal ganglion cell axon guidance	5/1007	21/16374	0.00775212	0.13551	0.122117	NRCAM/PTPRO/RPL24/SLIT2/EPHB2	5
GO:0051603	proteolysis involved in cellular protein catabolic process	10/1007	68/16374	0.00832927	0.144161	0.129913	MDM2/UBB/LGMN/FBXW7/MARCH7/USP14/CAPN2/PSMD14/HSP90AB1/LONP1	10
GO:0036297	interstrand cross-link repair	8/1007	48/16374	0.0083551	0.144161	0.129913	UBB/MUS81/ATR/NUCKS1/ERCC6L2/RNF168/RPS27A/UBC	8
GO:0070671	response to interleukin-12	8/1007	48/16374	0.0083551	0.144161	0.129913	ARF1/ANXA2/HSPA9/HNRNPA2B1/TCP1/HNRNPF/PPIA/PITPNA	8
GO:0016578	histone deubiquitination	4/1007	14/16374	0.0086578	0.146853	0.132339	USP36/SUPT3H/USP16/USP3	4
GO:0019081	viral translation	4/1007	14/16374	0.0086578	0.146853	0.132339	EIF3B/EIF3F/PCBP2/EIF3A	4
GO:0032743	positive regulation of interleukin-2 production	4/1007	14/16374	0.0086578	0.146853	0.132339	ANXA1/MAP3K7/RUNX1/RPS3	4
GO:0061157	mRNA destabilization	4/1007	14/16374	0.0086578	0.146853	0.132339	ROCK2/YTHDF2/METTL16/PUM1	4
GO:0006520	cellular amino acid metabolic process	11/1007	79/16374	0.00874131	0.147643	0.133051	ODC1/PSME4/SLC7A5/SLC7A6/PSMD1/ATF4/PSMD12/PSMA7/PSMB7/PSMD14/PSMD5	11
GO:0006886	intracellular protein transport	25/1007	245/16374	0.00895178	0.149933	0.135115	MDM2/SYNDIG1/CTTN/ARHGEF2/TXN/ARFGAP3/IPO5/ICE1/SNX1/SEC23IP/TP53/NUP58/SYTL2/CTDSPL2/NPM1/FLNA/XPO4/TPR/BAG3/STAM/CEP290/SNX9/PRR5L/STX18/PSEN1	25
GO:0071495	cellular response to endogenous stimulus	25/1007	245/16374	0.00895178	0.149933	0.135115	ACVR1/EGR1/DDX5/TGFBR2/RAPGEF1/HNRNPM/MAP3K7/POLR2F/TP53/UBE2D3/SMAD5/POLR2B/UBB/USP15/POLR2A/HNRNPF/USP9X/GTF2F2/NLK/RPS27A/ADAM9/UBC/ACVR2A/TGFB2/SPRED1	25
GO:0044238	primary metabolic process	18/1007	159/16374	0.00900022	0.150116	0.13528	ODC1/TGS1/PSME4/ROCK2/PSMD1/EDF1/PSMD12/NCOR2/LDLR/PSMA7/FDFT1/ABCA1/PSMB7/PSMD14/PLIN2/TXNRD1/PSMD5/HSP90AB1	18
GO:0001649	osteoblast differentiation	22/1007	208/16374	0.00918162	0.152502	0.137429	HSPE1/ACVR1/HNRNPU/CDK6/IARS/DDX21/CBFB/GTPBP4/FBN2/DDX5/RPS15/SNRNP200/SATB2/ADAR/RRAS2/SMAD5/WWTR1/CTNNB1/IL6R/SMOC1/ACVR2A/DDR2	22
GO:0051865	protein autoubiquitination	10/1007	69/16374	0.00921943	0.152502	0.137429	MDM2/TAF1/UBE2D3/LTN1/SH3RF1/UHRF2/UBE3A/MARCH7/RNF4/UBE2B	10
GO:0071349	cellular response to interleukin-12	8/1007	49/16374	0.00946115	0.154332	0.139079	ARF1/ANXA2/HSPA9/HNRNPA2B1/TCP1/HNRNPF/PPIA/PITPNA	8
GO:0000715	nucleotide-excision repair, DNA damage recognition	5/1007	22/16374	0.00953362	0.154332	0.139079	UBB/COPS8/RPS27A/XPC/UBC	5
GO:0042273	ribosomal large subunit biogenesis	5/1007	22/16374	0.00953362	0.154332	0.139079	RPL14/RPL11/MRTO4/RPL26/RPL5	5
GO:0000723	telomere maintenance	11/1007	80/16374	0.00958835	0.154332	0.139079	DHX36/SMG6/NAF1/PTGES3/HNRNPA2B1/GNL3/WRN/TNKS/MAP3K4/ZNF365/RIF1	11
GO:0034612	response to tumor necrosis factor	16/1007	137/16374	0.0100286	0.154332	0.139079	CHI3L1/ADAM17/TMSB4X/NFKBIA/ACTN4/PSME4/PSMD1/PSMD12/AFF3/PSMA7/TRAF3/PSMB7/PSMD14/PSMD5/ADAM9/LIMS1	16
GO:0007049	cell cycle	41/1007	458/16374	0.0101294	0.154332	0.139079	BIRC6/EGFR/HNRNPU/CDK6/NUDC/MDM2/HSF1/UBE2I/ITGB1/CDKL1/SENP5/RPS6KA3/RAD23A/NUP214/TAF1/RBBP4/RACK1/LGMN/DAPK3/PUM1/PRPF40A/WTAP/PRKCE/USP16/CSNK2A1/UHRF2/CDKL3/CCNT1/TXNL4A/CYLD/KLHL42/CDK8/GAK/USP9X/RIF1/RB1CC1/RPS6KB1/ITGB3BP/SDCBP/HSPA8/TGFB2	41
GO:0034504	protein localization to nucleus	17/1007	149/16374	0.0101527	0.154332	0.139079	HNRNPU/MDM2/GBP2/SKP1/IPO5/RPL11/NUP58/XPO1/DNAJB6/FLNA/MORC3/TPR/BAG3/POLR1A/EIF2AK3/PSEN1/TAF3	17
GO:0000245	spliceosomal complex assembly	7/1007	40/16374	0.0102067	0.154332	0.139079	KHDC4/SNRPD1/SNRNP200/PRPF6/YTHDC1/TXNL4A/SCAF11	7
GO:0006509	membrane protein ectodomain proteolysis	7/1007	40/16374	0.0102067	0.154332	0.139079	BACE2/ADAM17/NRDC/ADAM9/SNX9/PSEN1/SH3D19	7
GO:0021795	cerebral cortex cell migration	3/1007	8/16374	0.0102806	0.154332	0.139079	EGFR/PSEN1/FGF13	3
GO:0044387	negative regulation of protein kinase activity by regulation of protein phosphorylation	3/1007	8/16374	0.0102806	0.154332	0.139079	ADAR/NPM1/CORO1C	3
GO:0051983	regulation of chromosome segregation	3/1007	8/16374	0.0102806	0.154332	0.139079	ZNF207/PUM2/PUM1	3
GO:0006378	mRNA polyadenylation	6/1007	31/16374	0.0104287	0.154332	0.139079	HSF1/PABPC1/CCNT1/CSTF3/PAPOLA/NUDT21	6
GO:0070423	nucleotide-binding oligomerization domain containing signaling pathway	6/1007	31/16374	0.0104287	0.154332	0.139079	MAP3K7/UBB/CYLD/RPS27A/HSPA1A/UBC	6
GO:0031145	anaphase-promoting complex-dependent catabolic process	11/1007	81/16374	0.0104972	0.154332	0.139079	PSME4/PSMD1/PSMD12/UBB/ANAPC1/PSMA7/PSMB7/PSMD14/RPS27A/PSMD5/UBC	11
GO:0010977	negative regulation of neuron projection development	9/1007	60/16374	0.0105898	0.154332	0.139079	SPOCK1/FKBP4/MDM2/VIM/PTPRO/DGUOK/ZNF365/GAK/PAQR3	9
GO:0017148	negative regulation of translation	9/1007	60/16374	0.0105898	0.154332	0.139079	DHX36/RPL13A/RACK1/DAPK3/RBM3/ENC1/RPS3/EPRS/EIF2AK3	9
GO:1903078	positive regulation of protein localization to plasma membrane	8/1007	50/16374	0.0106726	0.154332	0.139079	EGFR/RER1/ITGB1/ITGA3/STAC/WNK3/PRKCE/EPHB2	8
GO:0000957	mitochondrial RNA catabolic process	2/1007	3/16374	0.0108722	0.154332	0.139079	LRPPRC/PNPT1	2
GO:0009452	7-methylguanosine RNA capping	2/1007	3/16374	0.0108722	0.154332	0.139079	TGS1/RNMT	2
GO:0021932	hindbrain radial glia guided cell migration	2/1007	3/16374	0.0108722	0.154332	0.139079	ITGB1/FLNA	2
GO:0021943	formation of radial glial scaffolds	2/1007	3/16374	0.0108722	0.154332	0.139079	ITGB1/FLNA	2
GO:0033024	mast cell apoptotic process	2/1007	3/16374	0.0108722	0.154332	0.139079	ADAM17/KITLG	2
GO:0034661	ncRNA catabolic process	2/1007	3/16374	0.0108722	0.154332	0.139079	TENT2/PNPT1	2
GO:0035928	rRNA import into mitochondrion	2/1007	3/16374	0.0108722	0.154332	0.139079	MRPL18/PNPT1	2
GO:0036369	transcription factor catabolic process	2/1007	3/16374	0.0108722	0.154332	0.139079	MDM2/TAF1	2
GO:0042998	positive regulation of Golgi to plasma membrane protein transport	2/1007	3/16374	0.0108722	0.154332	0.139079	RACK1/ACSL3	2
GO:0045069	regulation of viral genome replication	2/1007	3/16374	0.0108722	0.154332	0.139079	DDX5/PPIA	2
GO:0045605	negative regulation of epidermal cell differentiation	2/1007	3/16374	0.0108722	0.154332	0.139079	DLL1/EZH2	2
GO:0051088	PMA-inducible membrane protein ectodomain proteolysis	2/1007	3/16374	0.0108722	0.154332	0.139079	ADAM17/ADAM9	2
GO:0051154	negative regulation of striated muscle cell differentiation	2/1007	3/16374	0.0108722	0.154332	0.139079	YBX1/EZH2	2
GO:0051248	negative regulation of protein metabolic process	2/1007	3/16374	0.0108722	0.154332	0.139079	LDLR/HSP90AB1	2
GO:1901534	positive regulation of hematopoietic progenitor cell differentiation	2/1007	3/16374	0.0108722	0.154332	0.139079	DHX36/KITLG	2
GO:1903843	cellular response to arsenite ion	2/1007	3/16374	0.0108722	0.154332	0.139079	DHX36/VCP	2
GO:1990108	protein linear deubiquitination	2/1007	3/16374	0.0108722	0.154332	0.139079	CYLD/OTULIN	2
GO:1990120	messenger ribonucleoprotein complex assembly	2/1007	3/16374	0.0108722	0.154332	0.139079	CPSF6/NUDT21	2
GO:1990737	response to manganese-induced endoplasmic reticulum stress	2/1007	3/16374	0.0108722	0.154332	0.139079	ATF4/EIF2AK3	2
GO:2000392	regulation of lamellipodium morphogenesis	2/1007	3/16374	0.0108722	0.154332	0.139079	CD44/PDPN	2
GO:2000583	regulation of platelet-derived growth factor receptor-alpha signaling pathway	2/1007	3/16374	0.0108722	0.154332	0.139079	IFT20/CBLB	2
GO:2001247	positive regulation of phosphatidylcholine biosynthetic process	2/1007	3/16374	0.0108722	0.154332	0.139079	CAPN2/ACSL3	2
GO:0032606	type I interferon production	14/1007	115/16374	0.0109232	0.154508	0.139237	DHX36/PRKDC/TRIM56/G3BP1/RNF216/HSPD1/POLR2F/NPLOC4/PCBP2/TRAF3/CTNNB1/CYLD/IFI16/POLR3A	14
GO:0000002	mitochondrial genome maintenance	4/1007	15/16374	0.0112402	0.154834	0.139531	MEF2A/SLC25A33/OPA1/LONP1	4
GO:0003170	heart valve development	4/1007	15/16374	0.0112402	0.154834	0.139531	HECTD1/ADAMTS9/MDM4/TGFB2	4
GO:0034470	ncRNA processing	4/1007	15/16374	0.0112402	0.154834	0.139531	WDR43/BUD23/USP36/HEATR1	4
GO:0043518	negative regulation of DNA damage response, signal transduction by p53 class mediator	4/1007	15/16374	0.0112402	0.154834	0.139531	CD44/MDM2/MARCH7/KDM1A	4
GO:0046328	regulation of JNK cascade	4/1007	15/16374	0.0112402	0.154834	0.139531	GRIK2/EGFR/IGF1R/RAPGEF1	4
GO:0051044	positive regulation of membrane protein ectodomain proteolysis	4/1007	15/16374	0.0112402	0.154834	0.139531	NRDC/ADAM9/SNX9/SH3D19	4
GO:1990000	amyloid fibril formation	4/1007	15/16374	0.0112402	0.154834	0.139531	CRYAB/MDM2/LDLR/PSEN1	4
GO:0016358	dendrite development	13/1007	104/16374	0.0112557	0.154834	0.139531	TRAK2/HPRT1/MEF2A/GRIP1/ITGB1/SS18L1/DSCAM/CRK/ACSL4/EZH2/SRGAP2/PAK3/EPHB2	13
GO:1903047	mitotic cell cycle process	26/1007	263/16374	0.0115051	0.157722	0.142133	BCCIP/HNRNPU/NAA50/KPNB1/SMC5/PSME4/ZNF207/SKP1/PSMD1/PIBF1/PSMD12/DAPK3/RPL24/ANAPC1/PSMA7/CDK13/PPP2R2D/FLNA/CEP192/PSMB7/TPR/PSMD14/PSMD5/XPC/KIF2A/TENT4A	26
GO:0006913	nucleocytoplasmic transport	5/1007	23/16374	0.0115776	0.157869	0.142266	NUP214/XPO1/NPM1/NUP98/FBXO22	5
GO:0042493	response to drug	23/1007	225/16374	0.0115946	0.157869	0.142266	S100A10/ADAM17/HMGA2/TGFBR2/SRP54/ITGA3/CDKN1A/ATG5/SRP14/GCLM/ABCC1/XPO1/POR/ATR/CTNNB1/ABCA1/SRP19/PLIN2/XPC/TENT4A/UBE2B/MGST1/TGFB2	23
GO:0006417	regulation of translation	8/1007	51/16374	0.011995	0.16167	0.145692	RBM8A/MKNK2/RPL10/PTCD3/PUM2/RPL38/RBM3/RPS14	8
GO:0006521	regulation of cellular amino acid metabolic process	8/1007	51/16374	0.011995	0.16167	0.145692	ODC1/PSME4/PSMD1/PSMD12/PSMA7/PSMB7/PSMD14/PSMD5	8
GO:0042542	response to hydrogen peroxide	8/1007	51/16374	0.011995	0.16167	0.145692	CRYAB/HMOX1/CRK/UBE3A/APTX/PPP2CB/CAPN2/ADAM9	8
GO:0048511	rhythmic process	13/1007	105/16374	0.0121466	0.162101	0.14608	PRKDC/DDX5/ROCK2/RACK1/CREM/FBXW7/CSNK2A1/FBXW11/UBE3A/ARNTL2/USP9X/EZH2/PPP1CB	13
GO:0032835	glomerulus development	6/1007	32/16374	0.0121836	0.162101	0.14608	SULF2/ANGPT2/MYO1E/PTPRO/WWTR1/MTSS1	6
GO:0097421	liver regeneration	6/1007	32/16374	0.0121836	0.162101	0.14608	EGFR/SULF2/HMOX1/PNPT1/EZH2/RPL30	6
GO:0070727	cellular macromolecule localization	18/1007	164/16374	0.012189	0.162101	0.14608	EGFR/DHX36/SYNDIG1/CTTN/ARHGEF2/ARFGAP3/SNX1/SEC23IP/HSP90AA1/SYTL2/NPM1/ATR/CYLD/STAM/KDM1A/HSP90AB1/SNX9/STX18	18
GO:0097435	supramolecular fiber organization	15/1007	129/16374	0.0128856	0.170799	0.153918	CRYAB/FKBP4/ITGB1/ARHGEF2/CLIP1/TPM1/LDLR/RPS3/ACTG1/HSP90AB1/AEBP1/FHOD3/PSEN1/FGF13/HSPA8	15
GO:0001764	neuron migration	16/1007	141/16374	0.0130113	0.171895	0.154906	SPOCK1/NRCAM/ITGA3/ARHGEF2/SATB2/MATN2/SH3RF1/NTN1/CRK/FLNA/CTNNB1/USP9X/SRGAP2C/SRGAP2/PSEN1/FGF13	16
GO:0034644	cellular response to UV	8/1007	52/16374	0.013434	0.176896	0.159413	DHX36/TAF1/RPL26/TP53/ATF4/NPM1/ATR/KDM1A	8
GO:0000278	mitotic cell cycle	18/1007	166/16374	0.0136905	0.179682	0.161923	EGFR/HNRNPU/ENSA/MDM2/HSF1/NUP214/LGMN/CLIP1/EML4/DAPK3/USP16/WAPL/PPP2R2D/CYLD/USP3/RPS6KB1/SUGT1/SDCBP	18
GO:0010608	posttranscriptional regulation of gene expression	5/1007	24/16374	0.0139002	0.181246	0.163333	PUM2/METTL16/PUM1/YTHDC1/NUDT21	5
GO:0060828	regulation of canonical Wnt signaling pathway	5/1007	24/16374	0.0139002	0.181246	0.163333	CCNY/IFT20/CTNNB1/OTULIN/PSEN1	5
GO:0006891	intra-Golgi vesicle-mediated transport	4/1007	16/16374	0.0142702	0.183677	0.165524	COG5/GOLGA3/GOSR1/COPB2	4
GO:0061684	chaperone-mediated autophagy	4/1007	16/16374	0.0142702	0.183677	0.165524	EEF1A1/HSP90AA1/BAG3/HSPA8	4
GO:0097091	synaptic vesicle clustering	4/1007	16/16374	0.0142702	0.183677	0.165524	PCLO/SYNDIG1/CTNNB1/PCDH17	4
GO:1903146	regulation of autophagy of mitochondrion	4/1007	16/16374	0.0142702	0.183677	0.165524	USP36/CTTN/VDAC1/FBXW7	4
GO:0006474	N-terminal protein amino acid acetylation	3/1007	9/16374	0.014723	0.186507	0.168074	NAA15/NAA50/SOX4	3
GO:0031571	mitotic G1 DNA damage checkpoint	3/1007	9/16374	0.014723	0.186507	0.168074	RPS27L/PRKDC/TP53	3
GO:0035973	aggrephagy	3/1007	9/16374	0.014723	0.186507	0.168074	ATG5/UBQLN1/BAG3	3
GO:0051292	nuclear pore complex assembly	3/1007	9/16374	0.014723	0.186507	0.168074	NUP107/NUP153/NUP98	3
GO:2000234	positive regulation of rRNA processing	3/1007	9/16374	0.014723	0.186507	0.168074	WDR43/BUD23/HEATR1	3
GO:0060070	canonical Wnt signaling pathway	28/1007	295/16374	0.0149744	0.189093	0.170404	EGFR/DRAXIN/DIXDC1/SULF2/EGR1/MCC/G3BP1/PSME4/SOX4/CCNY/RAPGEF1/PSMD1/PTPRO/WWTR1/PSMD12/IFT20/DAPK3/TNKS/VCP/PSMA7/CTNNB1/CYLD/PSMB7/PSMD14/OTULIN/PSMD5/PSEN1/UBE2B	28
GO:0000422	autophagy of mitochondrion	7/1007	43/16374	0.0150475	0.189419	0.170698	MAP1LC3B/USP36/CTTN/AMBRA1/TP53/VDAC1/FBXW7	7
GO:0072655	establishment of protein localization to mitochondrion	9/1007	64/16374	0.0158738	0.199194	0.179507	USP36/HSPA4/UBE2D3/HSP90AA1/FBXW7/TOMM7/DNAJA1/BAG3/ARIH2	9
GO:0048013	ephrin receptor signaling pathway	11/1007	86/16374	0.016067	0.200988	0.181124	TIAM1/ROCK2/GRIN2B/CRK/ARHGEF7/ACTG1/ARPC2/SDCBP/PSEN1/PAK3/EPHB2	11
GO:0120039	plasma membrane bounded cell projection morphogenesis	6/1007	34/16374	0.0162963	0.203222	0.183137	CD44/TIAM1/CORO1C/CTNNB1/ARHGEF7/PDPN	6
GO:0000375	RNA splicing, via transesterification reactions	5/1007	25/16374	0.0165166	0.205329	0.185036	PRPF6/PRPF8/TXNL4A/SF3B3/SCAF11	5
GO:0042981	regulation of apoptotic process	17/1007	158/16374	0.0174442	0.215625	0.194314	EGR1/TRIM24/ACTN4/RBM25/RAF1/TP53/DAPK3/HIP1/WRN/VCP/SERBP1/TNFRSF10B/TPT1/TRAF3/CTNNB1/RPS3/DLG5	17
GO:0043154	negative regulation of cysteine-type endopeptidase activity involved in apoptotic process	9/1007	65/16374	0.0174526	0.215625	0.194314	CD44/CRYAB/MDM2/RPS6KA3/RAF1/SH3RF1/POR/DNAJB6/CSNK2A1	9
GO:0031124	mRNA 3'-end processing	10/1007	76/16374	0.0176284	0.217128	0.195669	DHX36/HSF1/RBM8A/CPSF6/CCNT1/CSTF3/PAPOLA/THOC2/THOC1/NUDT21	10
GO:0006978	DNA damage response, signal transduction by p53 class mediator resulting in transcription of p21 class mediator	4/1007	17/16374	0.0177708	0.217543	0.196043	RPS27L/CDKN1A/RPL26/TP53	4
GO:0043923	positive regulation by host of viral transcription	4/1007	17/16374	0.0177708	0.217543	0.196043	CHD1/SMARCA4/NUCKS1/CCNT1	4
GO:0019752	carboxylic acid metabolic process	8/1007	55/16374	0.0185049	0.220316	0.198542	ODC1/PSME4/PSMD1/PSMD12/PSMA7/PSMB7/PSMD14/PSMD5	8
GO:0060997	dendritic spine morphogenesis	8/1007	55/16374	0.0185049	0.220316	0.198542	DHX36/TIAM1/DOCK10/UBE3A/ZNF365/OPA1/PAK3/EPHB2	8
GO:0035051	cardiocyte differentiation	6/1007	35/16374	0.0186738	0.220316	0.198542	ACVR1/EGFR/HNRNPU/DHX36/DLL1/TGFB2	6
GO:0042177	negative regulation of protein catabolic process	6/1007	35/16374	0.0186738	0.220316	0.198542	EGFR/SERPINE2/MDM4/FLNA/SF3B3/SNX3	6
GO:2001237	negative regulation of extrinsic apoptotic signaling pathway	6/1007	35/16374	0.0186738	0.220316	0.198542	ACVR1/BIRC6/CTTN/GCLM/SH3RF1/RB1CC1	6
GO:0051276	chromosome organization	21/1007	210/16374	0.0192238	0.220316	0.198542	HNRNPU/BUD23/SMC5/HMGA2/SS18L1/ZNF830/RBBP4/SMARCA4/DNAJC2/DAPK3/FBXW7/NPM1/WAPL/CHD2/NUCKS1/TPR/SAFB/EZH2/AEBP2/ITGB3BP/TENT4A	21
GO:0022402	cell cycle process	22/1007	223/16374	0.0193985	0.220316	0.198542	MDM2/RBBP8/HMGA2/CHORDC1/ZNF207/ROCK2/RBBP4/TP53/XPO1/RYBP/MDM4/RPL23/NPM1/WAPL/CSNK2A1/UHRF2/SLC25A33/CTNNB1/CEP192/EZH2/HSP90AB1/TFDP2	22
GO:0000387	spliceosomal snRNP assembly	5/1007	26/16374	0.0194404	0.220316	0.198542	TGS1/SNRPD3/SNRPD1/STRAP/CLNS1A	5
GO:0007062	sister chromatid cohesion	5/1007	26/16374	0.0194404	0.220316	0.198542	NAA50/SMC5/FBXW7/WAPL/TENT4A	5
GO:0031334	positive regulation of protein-containing complex assembly	5/1007	26/16374	0.0194404	0.220316	0.198542	ICE1/VCP/WARS/RPS3/FNIP2	5
GO:0042327	positive regulation of phosphorylation	5/1007	26/16374	0.0194404	0.220316	0.198542	EGFR/PTGES3/DSCAM/SDCBP/PSEN1	5
GO:0045070	positive regulation of viral genome replication	5/1007	26/16374	0.0194404	0.220316	0.198542	PABPC1/RAD23A/ADAR/PPID/PPIA	5
GO:0007264	small GTPase mediated signal transduction	25/1007	262/16374	0.0194787	0.220316	0.198542	MAPKAP1/ARHGAP10/HMOX1/SIPA1L3/DOCK6/SIPA1L2/TIAM1/ARHGAP24/ARHGEF2/DOCK10/RAPGEF1/RASGEF1B/MYO9B/SRGAP1/RASA2/PPP2CB/ARHGEF7/ARHGAP21/RAB18/SRGAP2/SLIT2/DGKI/EPHB2/KITLG/TGFB2	25
GO:0043065	positive regulation of apoptotic process	29/1007	315/16374	0.0196154	0.220316	0.198542	NSMAF/HMOX1/PRKDC/TIAM1/ITGB1/HMGA2/ARHGEF2/SOX4/HSPD1/IFIT2/MAP3K20/RACK1/RPS6/TP53/ATF4/UBB/DAPK3/RYBP/PPID/CTNNB1/DNAJA1/ARHGEF7/TCTN3/RPS27A/PAWR/SLIT2/ITGB3BP/PSEN1/UBC	29
GO:0000731	DNA synthesis involved in DNA repair	3/1007	10/16374	0.0200844	0.220316	0.198542	RFC3/WRN/POLA1	3
GO:0006930	substrate-dependent cell migration, cell extension	3/1007	10/16374	0.0200844	0.220316	0.198542	CTTN/NTN1/SDCBP	3
GO:0009651	response to salt stress	3/1007	10/16374	0.0200844	0.220316	0.198542	TP53/ANXA7/HSP90AB1	3
GO:0044539	long-chain fatty acid import into cell	3/1007	10/16374	0.0200844	0.220316	0.198542	EPRS/RPS6KB1/ACSL3	3
GO:0061951	establishment of protein localization to plasma membrane	3/1007	10/16374	0.0200844	0.220316	0.198542	RACK1/NECTIN3/ACSL3	3
GO:0071705	nitrogen compound transport	3/1007	10/16374	0.0200844	0.220316	0.198542	ATG5/SYTL2/PRKCE	3
GO:1901264	carbohydrate derivative transport	3/1007	10/16374	0.0200844	0.220316	0.198542	ATG5/SYTL2/PRKCE	3
GO:1903800	positive regulation of production of miRNAs involved in gene silencing by miRNA	3/1007	10/16374	0.0200844	0.220316	0.198542	EGFR/DDX5/TP53	3
GO:2001028	positive regulation of endothelial cell chemotaxis	3/1007	10/16374	0.0200844	0.220316	0.198542	TMSB4X/LGMN/HSPB1	3
GO:0006977	DNA damage response, signal transduction by p53 class mediator resulting in cell cycle arrest	8/1007	56/16374	0.020464	0.220316	0.198542	MDM2/SOX4/CDKN1A/RPL26/TP53/MDM4/CNOT2/TFDP2	8
GO:0010972	negative regulation of G2/M transition of mitotic cell cycle	8/1007	56/16374	0.020464	0.220316	0.198542	PSME4/SKP1/PSMD1/PSMD12/PSMA7/PSMB7/PSMD14/PSMD5	8
GO:0030010	establishment of cell polarity	8/1007	56/16374	0.020464	0.220316	0.198542	UST/JAM3/ROCK2/RACK1/HSP90AA1/CRK/HSP90AB1/WWC1	8
GO:0006796	phosphate-containing compound metabolic process	10/1007	78/16374	0.0208329	0.220316	0.198542	EGFR/SMG6/ARF1/PTGES3/DSCAM/CDKN1A/DYNLL1/PRKRIP1/SDCBP/PSEN1	10
GO:0000056	ribosomal small subunit export from nucleus	2/1007	4/16374	0.0208593	0.220316	0.198542	RPS15/XPO1	2
GO:0003433	chondrocyte development involved in endochondral bone morphogenesis	2/1007	4/16374	0.0208593	0.220316	0.198542	TGFBR2/SERPINH1	2
GO:0006556	S-adenosylmethionine biosynthetic process	2/1007	4/16374	0.0208593	0.220316	0.198542	MAT2A/METTL16	2
GO:0006999	nuclear pore organization	2/1007	4/16374	0.0208593	0.220316	0.198542	NUP98/TPR	2
GO:0010499	proteasomal ubiquitin-independent protein catabolic process	2/1007	4/16374	0.0208593	0.220316	0.198542	PSME4/ENC1	2
GO:0021888	hypothalamus gonadotrophin-releasing hormone neuron development	2/1007	4/16374	0.0208593	0.220316	0.198542	UBB/NRP2	2
GO:0032057	negative regulation of translational initiation in response to stress	2/1007	4/16374	0.0208593	0.220316	0.198542	ATF4/EIF2AK3	2
GO:0032648	regulation of interferon-beta production	2/1007	4/16374	0.0208593	0.220316	0.198542	RNF216/TRAF3	2
GO:0035910	ascending aorta morphogenesis	2/1007	4/16374	0.0208593	0.220316	0.198542	SOX4/TGFB2	2
GO:0043371	negative regulation of CD4-positive, alpha-beta T cell differentiation	2/1007	4/16374	0.0208593	0.220316	0.198542	CBFB/RUNX1	2
GO:0043378	positive regulation of CD8-positive, alpha-beta T cell differentiation	2/1007	4/16374	0.0208593	0.220316	0.198542	CBFB/RUNX1	2
GO:0048254	snoRNA localization	2/1007	4/16374	0.0208593	0.220316	0.198542	NOP58/ZNHIT6	2
GO:0048790	maintenance of presynaptic active zone structure	2/1007	4/16374	0.0208593	0.220316	0.198542	PCLO/ERC2	2
GO:0051084	'de novo' posttranslational protein folding	2/1007	4/16374	0.0208593	0.220316	0.198542	UGGT1/SELENOF	2
GO:0071076	RNA 3' uridylation	2/1007	4/16374	0.0208593	0.220316	0.198542	TUT7/TENT4A	2
GO:0090118	receptor-mediated endocytosis involved in cholesterol transport	2/1007	4/16374	0.0208593	0.220316	0.198542	ANXA2/LDLR	2
GO:0090669	telomerase RNA stabilization	2/1007	4/16374	0.0208593	0.220316	0.198542	DHX36/NAF1	2
GO:1900024	regulation of substrate adhesion-dependent cell spreading	2/1007	4/16374	0.0208593	0.220316	0.198542	CORO1C/PDPN	2
GO:1900365	positive regulation of mRNA polyadenylation	2/1007	4/16374	0.0208593	0.220316	0.198542	HSF1/NUDT21	2
GO:1901537	positive regulation of DNA demethylation	2/1007	4/16374	0.0208593	0.220316	0.198542	OTUD4/USP9X	2
GO:1902806	regulation of cell cycle G1/S phase transition	2/1007	4/16374	0.0208593	0.220316	0.198542	TAF1/FBXW7	2
GO:1902953	positive regulation of ER to Golgi vesicle-mediated transport	2/1007	4/16374	0.0208593	0.220316	0.198542	ARF1/STX18	2
GO:1904031	positive regulation of cyclin-dependent protein kinase activity	2/1007	4/16374	0.0208593	0.220316	0.198542	CDKN1A/HSP90AB1	2
GO:1904528	positive regulation of microtubule binding	2/1007	4/16374	0.0208593	0.220316	0.198542	HSF1/PPP2CB	2
GO:2000623	negative regulation of nuclear-transcribed mRNA catabolic process, nonsense-mediated decay	2/1007	4/16374	0.0208593	0.220316	0.198542	PABPC1/DHX34	2
GO:0006090	pyruvate metabolic process	12/1007	101/16374	0.0210238	0.221469	0.199581	NUP107/NUP160/ME3/NUP214/RANBP2/VDAC1/NUP58/NUP153/GLO1/NUP98/TPR/ECD	12
GO:0007339	binding of sperm to zona pellucida	6/1007	36/16374	0.0212776	0.222375	0.200397	CCT4/CCT2/CCT8/CCT5/CCT3/TCP1	6
GO:1900026	positive regulation of substrate adhesion-dependent cell spreading	6/1007	36/16374	0.0212776	0.222375	0.200397	S100A10/CRK/FLNA/ARHGEF7/ARPC2/LIMS1	6
GO:0032508	DNA duplex unwinding	7/1007	46/16374	0.021332	0.222375	0.200397	DHX36/G3BP1/CHD1/WRN/CHD2/ZRANB3/ASCC3	7
GO:0061614	pri-miRNA transcription by RNA polymerase II	7/1007	46/16374	0.021332	0.222375	0.200397	DDX5/NFATC3/TP53/SMARCA4/GNL3/TEAD1/TGFB2	7
GO:0033209	tumor necrosis factor-mediated signaling pathway	17/1007	162/16374	0.0217595	0.222785	0.200767	ADAM17/TMSB4X/NFKBIA/ACTN4/PSME4/RACK1/PSMD1/PSMD12/PSMA7/TRAF3/CYLD/PSMB7/PSMD14/OTULIN/PSMD5/HSPA1A/LIMS1	17
GO:0003094	glomerular filtration	4/1007	18/16374	0.0217609	0.222785	0.200767	SULF2/MYO1E/PTPRO/XPNPEP3	4
GO:0007250	activation of NF-kappaB-inducing kinase activity	4/1007	18/16374	0.0217609	0.222785	0.200767	CHI3L1/MAP3K7/COPS8/TNFRSF10B	4
GO:0008156	negative regulation of DNA replication	4/1007	18/16374	0.0217609	0.222785	0.200767	GTPBP4/TP53/WAPL/ATR	4
GO:0042276	error-prone translesion synthesis	4/1007	18/16374	0.0217609	0.222785	0.200767	UBB/RFC3/RPS27A/UBC	4
GO:0048143	astrocyte activation	4/1007	18/16374	0.0217609	0.222785	0.200767	BACE2/EGFR/LDLR/PSEN1	4
GO:2000773	negative regulation of cellular senescence	4/1007	18/16374	0.0217609	0.222785	0.200767	CDK6/PRKDC/HMGA2/NAMPT	4
GO:0006914	autophagy	32/1007	359/16374	0.022434	0.228726	0.206121	LARS/HMOX1/VTI1A/MAP1LC3B/EEF1A1/USP36/CTTN/ABL2/RAB39A/ATG5/AMBRA1/MAP3K7/FOXK2/TP53/VDAC1/TMEM208/UBQLN1/DAPK3/FBXW7/VCP/EXOC1/NAMPT/RPTOR/MCL1/SUPT20H/ANXA7/ATG4B/RB1CC1/IFI16/HSPB1/ATP6V1A/HSPA8	32
GO:0071560	cellular response to transforming growth factor beta stimulus	15/1007	138/16374	0.0225994	0.228726	0.206121	ACVR1/TGFBR2/MAP3K7/TP53/SMAD5/UBB/USP15/CRK/USP9X/NLK/RPS27A/ADAM9/UBC/LIMS1/TGFB2	15
GO:0031297	replication fork processing	5/1007	27/16374	0.0226841	0.228726	0.206121	BOD1L1/WRN/NUCKS1/THOC1/ZRANB3	5
GO:0043392	negative regulation of DNA binding	5/1007	27/16374	0.0226841	0.228726	0.206121	HMOX1/HMGA2/NFKBIA/KDM1A/IFI16	5
GO:0050434	positive regulation of viral transcription	5/1007	27/16374	0.0226841	0.228726	0.206121	POLR2F/POLR2B/CCNT1/POLR2A/GTF2F2	5
GO:0060411	cardiac septum morphogenesis	5/1007	27/16374	0.0226841	0.228726	0.206121	MDM2/TGFBR2/CHD7/TP53/TGFB2	5
GO:0030166	proteoglycan biosynthetic process	7/1007	47/16374	0.0237791	0.239165	0.215528	UST/CHST15/CHST11/CTNNB1/CHSY1/EXT1/DSEL	7
GO:0010658	striated muscle cell apoptotic process	6/1007	37/16374	0.0241161	0.24074	0.216947	CAMK2D/HSF1/AMBRA1/TP53/CAPN2/BAG3	6
GO:0010761	fibroblast migration	6/1007	37/16374	0.0241161	0.24074	0.216947	PRKCE/CORO1C/ARHGEF7/PRR5L/PAK3/DDR2	6
GO:0042063	gliogenesis	6/1007	37/16374	0.0241161	0.24074	0.216947	GAP43/CDK6/SOX4/MATN2/EZH2/TGFB2	6
GO:1901990	regulation of mitotic cell cycle phase transition	10/1007	80/16374	0.024442	0.243387	0.219332	PSME4/SKP1/PSMD1/PSMD12/ANAPC1/PSMA7/PSMB7/PSMD14/PSMD5/XPC	10
GO:0006888	endoplasmic reticulum to Golgi vesicle-mediated transport	16/1007	153/16374	0.0262126	0.250543	0.225781	SEC31A/VTI1A/ARF1/ARFGAP3/DYNLL1/TRAPPC11/COG5/DCTN5/VCP/CAPZB/GOSR1/COPA/SCFD1/COPB2/STX18/CNIH3	16
GO:0034389	lipid droplet organization	4/1007	19/16374	0.0262554	0.250543	0.225781	FAF2/PPID/PPIA/RAB18	4
GO:0072132	mesenchyme morphogenesis	4/1007	19/16374	0.0262554	0.250543	0.225781	ACVR1/TGFBR2/ROBO1/TGFB2	4
GO:0098656	anion transmembrane transport	4/1007	19/16374	0.0262554	0.250543	0.225781	SLC4A7/VDAC1/ABCA1/VDAC3	4
GO:0045737	positive regulation of cyclin-dependent protein serine/threonine kinase activity	5/1007	28/16374	0.0262584	0.250543	0.225781	EGFR/ADAM17/MNAT1/CCNY/CCNT1	5
GO:0070979	protein K11-linked ubiquitination	5/1007	28/16374	0.0262584	0.250543	0.225781	UBE2E2/UBE2D3/ANAPC1/RNF4/UBE2B	5
GO:1900087	positive regulation of G1/S transition of mitotic cell cycle	5/1007	28/16374	0.0262584	0.250543	0.225781	EGFR/ADAM17/UBE2E2/RPTOR/RDX	5
GO:0000959	mitochondrial RNA metabolic process	3/1007	11/16374	0.0263749	0.250543	0.225781	LRPPRC/PNPT1/MTERF1	3
GO:0002328	pro-B cell differentiation	3/1007	11/16374	0.0263749	0.250543	0.225781	PRKDC/SOX4/NUDT21	3
GO:0006353	DNA-templated transcription, termination	3/1007	11/16374	0.0263749	0.250543	0.225781	XRN2/POLR2A/MTERF1	3
GO:0030490	maturation of SSU-rRNA	3/1007	11/16374	0.0263749	0.250543	0.225781	RPS14/RCL1/RPS19	3
GO:0043517	positive regulation of DNA damage response, signal transduction by p53 class mediator	3/1007	11/16374	0.0263749	0.250543	0.225781	DDX5/ATR/SPRED1	3
GO:0045116	protein neddylation	3/1007	11/16374	0.0263749	0.250543	0.225781	RNF7/RPL11/RPL5	3
GO:0045176	apical protein localization	3/1007	11/16374	0.0263749	0.250543	0.225781	RDX/DLG5/HCN1	3
GO:0050855	regulation of B cell receptor signaling pathway	3/1007	11/16374	0.0263749	0.250543	0.225781	CBFB/ELF2/RUNX1	3
GO:0070254	mucus secretion	3/1007	11/16374	0.0263749	0.250543	0.225781	ATG5/SYTL2/PRKCE	3
GO:0070988	demethylation	3/1007	11/16374	0.0263749	0.250543	0.225781	POR/OTUD4/USP9X	3
GO:2000637	positive regulation of gene silencing by miRNA	3/1007	11/16374	0.0263749	0.250543	0.225781	PUM2/PUM1/FXR1	3
GO:2000648	positive regulation of stem cell proliferation	3/1007	11/16374	0.0263749	0.250543	0.225781	HNRNPU/HMGA2/KDM1A	3
GO:0048008	platelet-derived growth factor receptor signaling pathway	7/1007	48/16374	0.0264125	0.250543	0.225781	MYO1E/RAPGEF1/IFT20/HIP1/PTPN12/CBLB/PDGFC	7
GO:0010659	cardiac muscle cell apoptotic process	6/1007	38/16374	0.0271971	0.254766	0.229587	CAMK2D/HSF1/GNB1/AMBRA1/TP53/CAPN2	6
GO:0032623	interleukin-2 production	6/1007	38/16374	0.0271971	0.254766	0.229587	IL1RAP/ANXA1/MAP3K7/RUNX1/RPS3/PAWR	6
GO:0032781	positive regulation of ATPase activity	6/1007	38/16374	0.0271971	0.254766	0.229587	DNAJB6/DNAJB1/ATP1B3/TPM1/DNAJA1/AHSA1	6
GO:0035329	hippo signaling	6/1007	38/16374	0.0271971	0.254766	0.229587	AMOTL1/WWTR1/YWHAB/DLG5/TEAD1/WWC1	6
GO:0032436	positive regulation of proteasomal ubiquitin-dependent protein catabolic process	8/1007	59/16374	0.027217	0.254766	0.229587	MDM2/RAD23A/TAF1/RACK1/VCP/FBXO22/HSPA1A/PSEN1	8
GO:0051726	regulation of cell cycle	11/1007	93/16374	0.0272395	0.254766	0.229587	ITGB1/CDKL1/NUP214/RBBP4/RACK1/PUM1/USP16/UHRF2/CDKL3/CDK8/HSPA8	11
GO:0120036	plasma membrane bounded cell projection organization	22/1007	231/16374	0.027655	0.258048	0.232545	SPOCK1/EGFR/FKBP4/MDM2/CTTN/ITGA3/RAPGEF1/ABL2/RRN3/VIM/PTPRO/UBB/DGUOK/ZNF365/GAK/KDM1A/SNX3/SRGAP2/PAQR3/ZNF804A/CNTNAP2/PSEN1	22
GO:0006839	mitochondrial transport	10/1007	82/16374	0.0284805	0.265133	0.238929	USP36/HSPA4/TP53/UBE2D3/HSP90AA1/FBXW7/TOMM7/BAG3/ARIH2/PSEN1	10
GO:0090263	positive regulation of canonical Wnt signaling pathway	14/1007	130/16374	0.0289337	0.268728	0.242168	EGFR/SULF2/PSME4/SOX4/PSMD1/PSMD12/DAPK3/TNKS/VCP/PSMA7/PSMB7/PSMD14/PSMD5/UBE2B	14
GO:1905114	cell surface receptor signaling pathway involved in cell-cell signaling	11/1007	94/16374	0.0292031	0.269674	0.243021	DIXDC1/CBFB/SULF2/ITGA3/MBD2/RACK1/SMARCA4/RUNX1/CSNK2A1/NLK/SNX3	11
GO:1990830	cellular response to leukemia inhibitory factor	11/1007	94/16374	0.0292031	0.269674	0.243021	GLDC/HNRNPU/MAT2A/CACYBP/RNMT/LRAT/UBXN2A/GCLM/NRP2/PFKP/RIF1	11
GO:0055007	cardiac muscle cell differentiation	7/1007	49/16374	0.0292377	0.269674	0.243021	ACVR1/HNRNPU/CACYBP/ITGB1/DLL1/ATG5/IFT20	7
GO:0006919	activation of cysteine-type endopeptidase activity involved in apoptotic process	9/1007	71/16374	0.0294014	0.270561	0.24382	HSPE1/RPS27L/HSPD1/RACK1/HIP1/VCP/TNFRSF10B/EIF2AK3/ROBO1	9
GO:0034330	cell junction organization	8/1007	60/16374	0.029775	0.27337	0.246352	IGSF9B/IL1RAP/RAPGEF1/CAST/PTPRO/VCP/PCDH17/ETV5	8
GO:0034109	homotypic cell-cell adhesion	5/1007	29/16374	0.0301729	0.27513	0.247938	SERPINE2/MEGF11/PDPN/RDX/UBASH3B	5
GO:0035666	TRIF-dependent toll-like receptor signaling pathway	5/1007	29/16374	0.0301729	0.27513	0.247938	UBE2D3/UBB/TRAF3/RPS27A/UBC	5
GO:0045739	positive regulation of DNA repair	5/1007	29/16374	0.0301729	0.27513	0.247938	EGFR/SMCHD1/RPS3/RNF168/EYA3	5
GO:0010243	response to organonitrogen compound	6/1007	39/16374	0.0305274	0.27773	0.250281	CDKN1A/NCOR2/FAF2/VCP/NPLOC4/MGST1	6
GO:0006626	protein targeting to mitochondrion	10/1007	83/16374	0.030668	0.278376	0.250863	USP36/HSPA4/TIMM23/UBE2D3/HSP90AA1/FBXW7/TIMM44/TOMM7/BAG3/ARIH2	10
GO:0006414	translational elongation	4/1007	20/16374	0.0312654	0.281881	0.254022	EEF1A1/RPLP2/USP16/HBS1L	4
GO:0010165	response to X-ray	4/1007	20/16374	0.0312654	0.281881	0.254022	HMGA2/XRRA1/CDKN1A/TP53	4
GO:0061003	positive regulation of dendritic spine morphogenesis	4/1007	20/16374	0.0312654	0.281881	0.254022	DHX36/TIAM1/OPA1/PAK3	4
GO:0001837	epithelial to mesenchymal transition	12/1007	107/16374	0.0313777	0.281901	0.254039	DDX5/TIAM1/HMGA2/TGFBR2/STRAP/WWTR1/CTNNB1/PDPN/EZH2/DLG5/SDCBP/TGFB2	12
GO:0006405	RNA export from nucleus	7/1007	50/16374	0.0322599	0.281901	0.254039	IWS1/RBM8A/CPSF6/NUP153/TPR/THOC2/THOC1	7
GO:0031397	negative regulation of protein ubiquitination	7/1007	50/16374	0.0322599	0.281901	0.254039	GTPBP4/SOX4/ATG5/PRKCE/DNAJA1/RPS3/HSPA1A	7
GO:0043525	positive regulation of neuron apoptotic process	7/1007	50/16374	0.0322599	0.281901	0.254039	GRIK2/TP53/ATF4/CTNNB1/MAP2K4/PAK3/TGFB2	7
GO:0006352	DNA-templated transcription, initiation	8/1007	61/16374	0.0324936	0.281901	0.254039	DHX36/TAF1/RRN3/TP53/SMARCA4/TAF7/CTNNB1/ZNF451	8
GO:0032922	circadian regulation of gene expression	8/1007	61/16374	0.0324936	0.281901	0.254039	HNRNPU/EGR1/KDM5A/ATF4/NRIP1/NAMPT/ZFHX3/PPP1CB	8
GO:0000492	box C/D snoRNP assembly	2/1007	5/16374	0.0333579	0.281901	0.254039	ZNHIT6/SNU13	2
GO:0002309	T cell proliferation involved in immune response	2/1007	5/16374	0.0333579	0.281901	0.254039	RPS6/TP53	2
GO:0002326	B cell lineage commitment	2/1007	5/16374	0.0333579	0.281901	0.254039	PRKDC/TP53	2
GO:0002360	T cell lineage commitment	2/1007	5/16374	0.0333579	0.281901	0.254039	PRKDC/TP53	2
GO:0006403	RNA localization	2/1007	5/16374	0.0333579	0.281901	0.254039	DHX36/PRPF6	2
GO:0006482	protein demethylation	2/1007	5/16374	0.0333579	0.281901	0.254039	PPME1/KDM1A	2
GO:0006595	polyamine metabolic process	2/1007	5/16374	0.0333579	0.281901	0.254039	ODC1/AMD1	2
GO:0019626	short-chain fatty acid catabolic process	2/1007	5/16374	0.0333579	0.281901	0.254039	PCCA/MUT	2
GO:0035905	ascending aorta development	2/1007	5/16374	0.0333579	0.281901	0.254039	SOX4/TGFB2	2
GO:0045040	protein insertion into mitochondrial outer membrane	2/1007	5/16374	0.0333579	0.281901	0.254039	HSPA4/HSP90AA1	2
GO:0045636	positive regulation of melanocyte differentiation	2/1007	5/16374	0.0333579	0.281901	0.254039	ADAMTS9/KITLG	2
GO:0051246	regulation of protein metabolic process	2/1007	5/16374	0.0333579	0.281901	0.254039	ROCK2/LDLR	2
GO:0070934	CRD-mediated mRNA stabilization	2/1007	5/16374	0.0333579	0.281901	0.254039	HNRNPU/YBX1	2
GO:0071205	protein localization to juxtaparanode region of axon	2/1007	5/16374	0.0333579	0.281901	0.254039	NFASC/CNTNAP2	2
GO:0071500	cellular response to nitrosative stress	2/1007	5/16374	0.0333579	0.281901	0.254039	ATG5/DNAJA1	2
GO:0071504	cellular response to heparin	2/1007	5/16374	0.0333579	0.281901	0.254039	EGR1/SLIT2	2
GO:0075525	viral translational termination-reinitiation	2/1007	5/16374	0.0333579	0.281901	0.254039	EIF3B/EIF3A	2
GO:0097327	response to antineoplastic agent	2/1007	5/16374	0.0333579	0.281901	0.254039	ADAM9/RPL18A	2
GO:1900020	positive regulation of protein kinase C activity	2/1007	5/16374	0.0333579	0.281901	0.254039	EGFR/CEMIP	2
GO:1902254	negative regulation of intrinsic apoptotic signaling pathway by p53 class mediator	2/1007	5/16374	0.0333579	0.281901	0.254039	MDM2/RRN3	2
GO:1902749	regulation of cell cycle G2/M phase transition	2/1007	5/16374	0.0333579	0.281901	0.254039	TP53/NEK10	2
GO:1905907	negative regulation of amyloid fibril formation	2/1007	5/16374	0.0333579	0.281901	0.254039	CRYAB/LDLR	2
GO:2000117	negative regulation of cysteine-type endopeptidase activity	2/1007	5/16374	0.0333579	0.281901	0.254039	PCID2/IFI16	2
GO:0021554	optic nerve development	3/1007	12/16374	0.0335915	0.281901	0.254039	RPL24/NAV2/EPHB2	3
GO:0035518	histone H2A monoubiquitination	3/1007	12/16374	0.0335915	0.281901	0.254039	SKP1/RYBP/RNF168	3
GO:0048024	regulation of mRNA splicing, via spliceosome	3/1007	12/16374	0.0335915	0.281901	0.254039	KHDRBS3/METTL16/YTHDC1	3
GO:0048333	mesodermal cell differentiation	3/1007	12/16374	0.0335915	0.281901	0.254039	ITGB1/HMGA2/ITGA3	3
GO:0006362	transcription elongation from RNA polymerase I promoter	5/1007	30/16374	0.0344353	0.286579	0.258255	TAF1D/MNAT1/POLR2F/POLR1A/CCNH	5
GO:0006369	termination of RNA polymerase II transcription	5/1007	30/16374	0.0344353	0.286579	0.258255	SNRPD3/SLBP/CSTF3/PAPOLA/NUDT21	5
GO:0016071	mRNA metabolic process	5/1007	30/16374	0.0344353	0.286579	0.258255	IWS1/PNPT1/PCBP2/NUDT21/PRR5L	5
GO:1902895	positive regulation of pri-miRNA transcription by RNA polymerase II	5/1007	30/16374	0.0344353	0.286579	0.258255	TP53/SMARCA4/GNL3/TEAD1/TGFB2	5
GO:0031589	cell-substrate adhesion	18/1007	184/16374	0.034594	0.287303	0.258908	SPOCK1/CDK6/S100A10/ANGPT2/ITGB1/CTTN/ITGA3/ACTN4/PTPRO/PEAK1/CRK/PRKCE/CORO1C/FLNA/ARHGEF7/PDPN/ARPC2/LIMS1	18
GO:0051259	protein complex oligomerization	12/1007	109/16374	0.035527	0.29444	0.265339	CAMK2D/CRYAB/KHDRBS3/DGKH/ZNHIT6/RACK1/TP53/TRAPPC11/TRAPPC10/NPM1/OPA1/SNX9	12
GO:0048812	neuron projection morphogenesis	32/1007	373/16374	0.0356927	0.295203	0.266027	EGFR/TRAK2/DRAXIN/DHX36/UST/TIAM1/GRIP1/ITGB1/CTTN/DOCK10/DSCAM/NFASC/MATN2/SH3KBP1/PTPRO/HSP90AA1/UBB/CTNNB1/UBE3A/NRP2/ZNF365/USP9X/OPA1/HSP90AB1/SRGAP2/SLIT2/CNTNAP2/PSEN1/EXT1/PAK3/EPHB2/ROBO1	32
GO:0050852	T cell receptor signaling pathway	17/1007	172/16374	0.0360682	0.297693	0.268271	PSME4/SKP1/PSMD1/MAP3K7/PSMD12/EIF2B1/PSMA7/EIF2B3/FBXW11/RPS3/CYLD/PSMB7/PSMD14/PSMD5/PAWR/PSEN1/PAK3	17
GO:0010628	positive regulation of gene expression	30/1007	346/16374	0.0363638	0.299515	0.269913	DHX36/CDK6/EGR1/MDM2/HMGA2/ITGA3/EPB41L4B/ROCK2/RPL11/FUBP1/TP53/ATF4/RPS7/FUBP3/RPL23/WARS/LDLR/RPL5/RPS3/JPX/RDX/EIF2AK3/PAWR/DNAJA4/ZNF804A/HSPA1A/PSEN1/LIMS1/EPHB2/ROBO1	30
GO:0002063	chondrocyte development	4/1007	21/16374	0.0367979	0.300616	0.270905	SULF2/CHST11/EIF2AK3/CHSY1	4
GO:0015833	peptide transport	4/1007	21/16374	0.0367979	0.300616	0.270905	DNAJA1/SCFD1/GAPVD1/SNX3	4
GO:0032801	receptor catabolic process	4/1007	21/16374	0.0367979	0.300616	0.270905	ANXA2/LGMN/MTMR2/SNX25	4
GO:0051893	regulation of focal adhesion assembly	4/1007	21/16374	0.0367979	0.300616	0.270905	ROCK2/PEAK1/DAPK3/CORO1C	4
GO:0006757	ATP generation from ADP	9/1007	74/16374	0.0371318	0.302111	0.272252	NUP107/NUP160/NUP214/RANBP2/NUP58/NUP153/NUP98/TPR/ECD	9
GO:0031647	regulation of protein stability	9/1007	74/16374	0.0371318	0.302111	0.272252	TRIM24/USP36/SOX4/TOMM7/MOSMO/APTX/USP3/SUGT1/HSPA8	9
GO:0140014	mitotic nuclear division	12/1007	110/16374	0.0377413	0.306393	0.276111	BCCIP/KPNB1/ZNF207/PIBF1/DAPK3/RPL24/USP16/CDK13/PPP2R2D/FLNA/CEP192/KIF2A	12
GO:0016043	cellular component organization	19/1007	199/16374	0.0378112	0.306393	0.276111	EGFR/SERPINE2/NRCAM/HNRNPU/TMEM38B/ITGA3/SEC23IP/TRAPPC11/NPLOC4/MTSS1/BLZF1/ARHGEF7/NRP2/GAK/ARHGAP21/EIF2AK3/HIKESHI/SERP1/HSPA8	19
GO:0000381	regulation of alternative mRNA splicing, via spliceosome	6/1007	41/16374	0.0379606	0.306982	0.276642	HNRNPU/DDX5/RBM8A/HNRNPL/RBM25/WTAP	6
GO:0034101	erythrocyte homeostasis	7/1007	52/16374	0.0389139	0.312026	0.281187	HMOX1/RPS24/HSPA9/ADAR/SMAD5/RPS14/RPS19	7
GO:0006363	termination of RNA polymerase I transcription	5/1007	31/16374	0.039052	0.312026	0.281187	TAF1D/MNAT1/POLR2F/POLR1A/CCNH	5
GO:0009409	response to cold	5/1007	31/16374	0.039052	0.312026	0.281187	HSPD1/HSP90AA1/ATP2B1/VGF/ZNF516	5
GO:0021675	nerve development	5/1007	31/16374	0.039052	0.312026	0.281187	SERPINE2/SULF2/CHD7/CTNNB1/NRP2	5
GO:0033619	membrane protein proteolysis	5/1007	31/16374	0.039052	0.312026	0.281187	HM13/NRDC/ADAM9/SNX9/SH3D19	5
GO:1903955	positive regulation of protein targeting to mitochondrion	5/1007	31/16374	0.039052	0.312026	0.281187	USP36/UBE2D3/FBXW7/TOMM7/ARIH2	5
GO:0007030	Golgi organization	9/1007	75/16374	0.0399903	0.318104	0.286665	SEC23IP/TRAPPC11/NPLOC4/BLZF1/ARHGEF7/GAK/ARHGAP21/STX18/HIKESHI	9
GO:0018209	peptidyl-serine modification	12/1007	111/16374	0.0400511	0.318104	0.286665	CD44/EGFR/MAPKAP1/TXN/RACK1/RAF1/HSP90AA1/RPTOR/HSP90AB1/PLCL1/PAQR3/FNIP2	12
GO:0038095	Fc-epsilon receptor signaling pathway	12/1007	111/16374	0.0400511	0.318104	0.286665	PSME4/SKP1/PSMD1/MAP3K7/NFATC3/PSMD12/PSMA7/MAP2K4/FBXW11/PSMB7/PSMD14/PSMD5	12
GO:0044703	multi-organism reproductive process	14/1007	136/16374	0.0402677	0.319191	0.287644	VMP1/SERPINE2/FKBP4/ANGPT2/HSF1/TGFBR2/ITGA3/SPP1/ACSL4/FNDC3A/KPNA6/RPL29/NECTIN3/ACVR2A	14
GO:0097191	extrinsic apoptotic signaling pathway	17/1007	175/16374	0.0414643	0.322105	0.29027	ACVR1/BIRC6/HMOX1/CTTN/ARHGEF2/STRADB/RAF1/GCLM/SH3RF1/DAPK3/MCL1/TNFRSF10B/CYLD/RB1CC1/IL6R/HSPA1A/TGFB2	17
GO:0010666	positive regulation of cardiac muscle cell apoptotic process	3/1007	13/16374	0.04172	0.322105	0.29027	CAMK2D/TP53/CAPN2	3
GO:0030201	heparan sulfate proteoglycan metabolic process	3/1007	13/16374	0.04172	0.322105	0.29027	SULF2/CTNNB1/EXT1	3
GO:0030516	regulation of axon extension	3/1007	13/16374	0.04172	0.322105	0.29027	NRCAM/CTTN/WDR36	3
GO:0034214	protein hexamerization	3/1007	13/16374	0.04172	0.322105	0.29027	MAT2A/YME1L1/VCP	3
GO:0048489	synaptic vesicle transport	3/1007	13/16374	0.04172	0.322105	0.29027	ARF1/CTNNB1/TMEM230	3
GO:0070431	nucleotide-binding oligomerization domain containing 2 signaling pathway	3/1007	13/16374	0.04172	0.322105	0.29027	NFKBIA/OTULIN/HSPA1A	3
GO:0071850	mitotic cell cycle arrest	3/1007	13/16374	0.04172	0.322105	0.29027	CDKN1A/TP53/PNPT1	3
GO:0090399	replicative senescence	3/1007	13/16374	0.04172	0.322105	0.29027	CDKN1A/TP53/ATR	3
GO:1902475	L-alpha-amino acid transmembrane transport	3/1007	13/16374	0.04172	0.322105	0.29027	SLC38A1/SLC7A5/SLC7A6	3
GO:1990403	embryonic brain development	3/1007	13/16374	0.04172	0.322105	0.29027	RPL10/CTNNB1/TBC1D23	3
GO:2001034	positive regulation of double-strand break repair via nonhomologous end joining	3/1007	13/16374	0.04172	0.322105	0.29027	SMCHD1/PRKDC/RIF1	3
GO:2001224	positive regulation of neuron migration	3/1007	13/16374	0.04172	0.322105	0.29027	ARHGEF2/FLNA/SRGAP2C	3
GO:0044772	mitotic cell cycle phase transition	27/1007	309/16374	0.0417618	0.322105	0.29027	EGFR/CDK6/ADAM17/PSME4/UBE2E2/SKP1/CDKN1A/DYNLL1/PSMD1/HSP90AA1/PSMD12/BACH1/ANAPC1/RPTOR/PSMA7/CEP192/PSMB7/ECD/POLA1/PSMD14/RDX/PSMD5/CEP290/EZH2/XPC/TFDP2/MYO16	27
GO:0060412	ventricular septum morphogenesis	6/1007	42/16374	0.0420735	0.322899	0.290986	ACVR1/TGFBR2/SOX4/SLIT2/ROBO1/TGFB2	6
GO:0030097	hemopoiesis	14/1007	137/16374	0.0424257	0.322899	0.290986	CBFB/SIPA1L3/MKNK2/DLL1/ADAR/TP53/TENT2/RUNX1/CDK13/ZNF160/ARIH2/IFI16/PSEN1/TGFB2	14
GO:0002223	stimulatory C-type lectin receptor signaling pathway	12/1007	112/16374	0.0424581	0.322899	0.290986	PSME4/SKP1/RAF1/PSMD1/MAP3K7/PSMD12/PSMA7/FBXW11/PSMB7/PSMD14/PSMD5/PAK3	12
GO:0051290	protein heterotetramerization	7/1007	53/16374	0.0425537	0.322899	0.290986	S100A10/ANXA2/NUP58/CPSF6/GRIN2B/FARSB/NUDT21	7
GO:0000717	nucleotide-excision repair, DNA duplex unwinding	4/1007	22/16374	0.0428566	0.322899	0.290986	UBB/RPS27A/XPC/UBC	4
GO:0002756	MyD88-independent toll-like receptor signaling pathway	4/1007	22/16374	0.0428566	0.322899	0.290986	UBE2D3/UBB/RPS27A/UBC	4
GO:0022604	regulation of cell morphogenesis	4/1007	22/16374	0.0428566	0.322899	0.290986	FMNL2/CAPZB/LARP4/SH3D19	4
GO:0032941	secretion by tissue	4/1007	22/16374	0.0428566	0.322899	0.290986	WNK3/ATG5/SYTL2/PRKCE	4
GO:0035909	aorta morphogenesis	4/1007	22/16374	0.0428566	0.322899	0.290986	SOX4/CHD7/ADAMTS9/TGFB2	4
GO:0090316	positive regulation of intracellular protein transport	4/1007	22/16374	0.0428566	0.322899	0.290986	ICE1/TPR/CEP290/PRR5L	4
GO:0016236	macroautophagy	19/1007	202/16374	0.0429687	0.322899	0.290986	HMOX1/MAP1LC3B/USP36/DYNLL1/ATG5/AMBRA1/MAP3K7/VDAC1/UBQLN1/VCP/EXOC1/RPTOR/CSNK2A1/TOMM7/VTA1/STAM/ATG4B/RB1CC1/ATP6V1A	19
GO:0051403	stress-activated MAPK cascade	19/1007	202/16374	0.0429687	0.322899	0.290986	GRIK2/CRYAB/EGFR/MAP4K5/IGF1R/SKP1/RAPGEF1/MAP3K20/MAP3K7/UBB/SH3RF1/FBXW11/MAP3K4/CYLD/RPS27A/RB1CC1/SDCBP/UBC/TGFB2	19
GO:0000902	cell morphogenesis	9/1007	76/16374	0.0429941	0.322899	0.290986	ARHGEF2/FMNL2/PTPRO/CAPZB/SCFD1/PDPN/LARP4/SH3D19/TGFB2	9
GO:0016052	carbohydrate catabolic process	9/1007	76/16374	0.0429941	0.322899	0.290986	NUP107/NUP160/NUP214/RANBP2/NUP58/NUP153/NUP98/TPR/ECD	9
GO:0007050	cell cycle arrest	17/1007	176/16374	0.0433858	0.325231	0.293087	CDK6/MDM2/HMGA2/STRADB/CDKN1A/MAP3K20/TP53/MDM4/RPL23/RPTOR/UHRF2/SLC25A33/CDC123/ZFHX3/HSP90AB1/GAS7/TGFB2	17
GO:0042752	regulation of circadian rhythm	8/1007	65/16374	0.0450452	0.337039	0.303729	PRKDC/ROCK2/CREM/FBXW7/UBE3A/USP9X/EZH2/PPP1CB	8
GO:0007010	cytoskeleton organization	25/1007	284/16374	0.0452485	0.337928	0.30453	PCLO/SHROOM4/DIXDC1/FMNL3/ARF1/SIPA1L3/TMSB4X/BIN3/ARHGEF2/FMNL2/PFDN2/ROCK2/MAP3K20/SH3KBP1/PRPF40A/CRK/CAPZB/TPM1/CYLD/KLHL20/CAPN2/LARP4/TMSB10/FHOD3/SH3D19	25
GO:0034599	cellular response to oxidative stress	11/1007	101/16374	0.0458523	0.340837	0.30715	MAPKAP1/HMOX1/TP53/VKORC1L1/PNPT1/PRDX6/ETV5/TXNRD1/LONP1/PRR5L/HSPA1A	11
GO:0007623	circadian rhythm	13/1007	126/16374	0.046203	0.340837	0.30715	EGFR/PRKDC/ROCK2/NRIP1/CREM/FBXW7/NAMPT/FBXW11/UBE3A/ARNTL2/USP9X/EZH2/PPP1CB	13
GO:0051146	striated muscle cell differentiation	10/1007	89/16374	0.046314	0.340837	0.30715	ACVR1/MYOF/KCNH1/HNRNPU/ADAM12/DLL1/YBX1/CAPN2/MORF4L2/EZH2	10
GO:0002042	cell migration involved in sprouting angiogenesis	7/1007	54/16374	0.0464067	0.340837	0.30715	HMOX1/ITGB1/ANXA1/FBXW7/SLIT2/ROBO1/SPRED1	7
GO:0050714	positive regulation of protein secretion	6/1007	43/16374	0.0464561	0.340837	0.30715	ARF1/PPID/EXOC1/PPIA/ADAM9/TGFB2	6
GO:0000018	regulation of DNA recombination	2/1007	6/16374	0.0480219	0.340837	0.30715	KPNA1/THOC1	2
GO:0001731	formation of translation preinitiation complex	2/1007	6/16374	0.0480219	0.340837	0.30715	RPL13A/EIF5	2
GO:0001765	membrane raft assembly	2/1007	6/16374	0.0480219	0.340837	0.30715	S100A10/ANXA2	2
GO:0002372	myeloid dendritic cell cytokine production	2/1007	6/16374	0.0480219	0.340837	0.30715	DHX36/DDX21	2
GO:0002735	positive regulation of myeloid dendritic cell cytokine production	2/1007	6/16374	0.0480219	0.340837	0.30715	DHX36/DDX21	2
GO:0006348	chromatin silencing at telomere	2/1007	6/16374	0.0480219	0.340837	0.30715	RIF1/EZH2	2
GO:0010835	regulation of protein ADP-ribosylation	2/1007	6/16374	0.0480219	0.340837	0.30715	PUM3/WARS	2
GO:0031340	positive regulation of vesicle fusion	2/1007	6/16374	0.0480219	0.340837	0.30715	ANXA2/ANXA1	2
GO:0031670	cellular response to nutrient	2/1007	6/16374	0.0480219	0.340837	0.30715	HMOX1/TNKS	2
GO:0032210	regulation of telomere maintenance via telomerase	2/1007	6/16374	0.0480219	0.340837	0.30715	SMG6/TNKS	2
GO:0032510	endosome to lysosome transport via multivesicular body sorting pathway	2/1007	6/16374	0.0480219	0.340837	0.30715	LYST/VCP	2
GO:0035790	platelet-derived growth factor receptor-alpha signaling pathway	2/1007	6/16374	0.0480219	0.340837	0.30715	IFT20/CBLB	2
GO:0036092	phosphatidylinositol-3-phosphate biosynthetic process	2/1007	6/16374	0.0480219	0.340837	0.30715	INPP4B/INPP4A	2
GO:0045646	regulation of erythrocyte differentiation	2/1007	6/16374	0.0480219	0.340837	0.30715	CDK6/HSPA9	2
GO:0046931	pore complex assembly	2/1007	6/16374	0.0480219	0.340837	0.30715	CCT8/CCT3	2
GO:0048478	replication fork protection	2/1007	6/16374	0.0480219	0.340837	0.30715	ZNF830/ZRANB3	2
GO:0051220	cytoplasmic sequestering of protein	2/1007	6/16374	0.0480219	0.340837	0.30715	FLNA/YWHAB	2
GO:0051891	positive regulation of cardioblast differentiation	2/1007	6/16374	0.0480219	0.340837	0.30715	DHX36/TGFB2	2
GO:0060136	embryonic process involved in female pregnancy	2/1007	6/16374	0.0480219	0.340837	0.30715	HSF1/ACSL4	2
GO:0060440	trachea formation	2/1007	6/16374	0.0480219	0.340837	0.30715	TGFBR2/CTNNB1	2
GO:0070842	aggresome assembly	2/1007	6/16374	0.0480219	0.340837	0.30715	VCP/BAG3	2
GO:1905274	regulation of modification of postsynaptic actin cytoskeleton	2/1007	6/16374	0.0480219	0.340837	0.30715	CTTNBP2/TIAM1	2
GO:1990845	adaptive thermogenesis	2/1007	6/16374	0.0480219	0.340837	0.30715	HNRNPU/THADA	2
GO:0019221	cytokine-mediated signaling pathway	32/1007	383/16374	0.0483207	0.34235	0.308515	IL1R1/CBFB/ABCE1/HMOX1/TRIM44/IL1RAP/ADAM17/ITGB1/ANXA1/RAPGEF1/CDKN1A/RACK1/ADAR/VIM/TP53/HSP90AA1/UBB/OTUD4/CRK/RUNX1/MCL1/CYLD/OTULIN/ZC3H15/RPS27A/HSP90AB1/IL6R/SLIT2/HSPA1A/UBC/HSPA8/ROBO1	32
GO:0045815	positive regulation of gene expression, epigenetic	5/1007	33/16374	0.0493653	0.34424	0.310217	DDX21/TAF1D/POLR2F/CTNNB1/POLR1A	5
GO:0001816	cytokine production	35/1007	426/16374	0.0493658	0.34424	0.310217	CHI3L1/IL1R1/DHX36/SULF2/IL1RAP/PRKDC/ADAM17/TRIM56/RNF216/ARHGEF2/HSPD1/ANXA1/DLL1/PIBF1/MAP3K7/POLR2F/ATF4/ATP2B1/RUNX1/NPLOC4/PCBP2/TRAF3/CTNNB1/KPNA6/RPS3/TBC1D23/CYLD/CAPN2/SARS/EIF2AK3/IFI16/PAWR/IL6R/HSPA1A/POLR3A	35
GO:0001702	gastrulation with mouth forming second	4/1007	23/16374	0.0494417	0.34424	0.310217	ACVR1/CTNNB1/TENM4/ACVR2A	4
GO:0001708	cell fate specification	4/1007	23/16374	0.0494417	0.34424	0.310217	ITGB1/CTNNB1/LMO4/PSEN1	4
GO:0006297	nucleotide-excision repair, DNA gap filling	4/1007	23/16374	0.0494417	0.34424	0.310217	UBB/RFC3/RPS27A/UBC	4
GO:0071157	negative regulation of cell cycle arrest	4/1007	23/16374	0.0494417	0.34424	0.310217	MDM2/MDM4/RPL23/HSP90AB1	4
GO:2000378	negative regulation of reactive oxygen species metabolic process	4/1007	23/16374	0.0494417	0.34424	0.310217	CRYAB/ATG5/TP53/VDAC1	4
GO:0000956	nuclear-transcribed mRNA catabolic process	9/1007	78/16374	0.0494474	0.34424	0.310217	DHX36/DDX5/PABPC1/DIS3/TUT7/DHX34/CNOT2/HBS1L/TENT4A	9
GO:0006303	double-strand break repair via nonhomologous end joining	9/1007	78/16374	0.0494474	0.34424	0.310217	SMCHD1/PRKDC/HSF1/HMGA2/CYREN/POLA1/RNF168/PSMD14/RIF1	9
GO:0016197	endosomal transport	9/1007	78/16374	0.0494474	0.34424	0.310217	UBB/CORO1C/UBAP1/ABCA1/VTA1/STAM/RPS27A/SNX9/UBC	9
GO:0008104	protein localization	24/1007	273/16374	0.0496024	0.344719	0.310649	EGFR/NRCAM/SYNDIG1/CTTN/BIN3/ARHGEF2/ARFGAP3/RACK1/SNX1/SEC23IP/TP53/HSP90AA1/SYTL2/DNAJB6/FBXW7/NPM1/CYLD/TPR/STAM/CEP290/KDM1A/HSP90AB1/SNX9/STX18	24
GO:0021545	cranial nerve development	3/1007	14/16374	0.050737	0.35034	0.315715	CHD7/CTNNB1/EPHB2	3
GO:0050765	negative regulation of phagocytosis	3/1007	14/16374	0.050737	0.35034	0.315715	RACK1/ATG5/SNX3	3
GO:0090505	epiboly involved in wound healing	3/1007	14/16374	0.050737	0.35034	0.315715	CD44/FLNA/PDPN	3
GO:0048699	generation of neurons	21/1007	233/16374	0.0509407	0.35034	0.315715	SPOCK1/NRCAM/CDK6/XRN2/ITGA3/SATB2/CHD7/MATN2/DLL1/ATF4/SH3RF1/DAPK3/TENT2/NTN1/CRK/CTNNB1/THOC2/USP9X/PSEN1/FGF13/TGFB2	21
GO:0002548	monocyte chemotaxis	6/1007	44/16374	0.0511114	0.35034	0.315715	ANXA1/PTPRO/LGMN/RPS19/IL6R/SLIT2	6
GO:0035904	aorta development	6/1007	44/16374	0.0511114	0.35034	0.315715	HECTD1/CHD7/DCTN5/ADAMTS9/ADAMTS6/ROBO1	6
GO:0044265	cellular macromolecule catabolic process	6/1007	44/16374	0.0511114	0.35034	0.315715	MDM2/HSP90AA1/LGMN/CAPN2/RDX/LONP1	6
GO:0070534	protein K63-linked ubiquitination	6/1007	44/16374	0.0511114	0.35034	0.315715	TRIM56/UBE2E2/RNF168/ARIH2/RNF4/UBE2B	6
GO:0050808	synapse organization	17/1007	180/16374	0.0517103	0.35384	0.318869	IGSF9B/IL1RAP/RER1/SYNDIG1/CAST/NFASC/PTPRO/NTN1/VCP/CTNNB1/PCDH17/ETV5/DLG5/PSEN1/PAK3/EPHB2/NLGN4Y	17
GO:0044839	cell cycle G2/M phase transition	16/1007	168/16374	0.0543587	0.371328	0.334628	PSME4/SKP1/DYNLL1/PSMD1/TP53/HSP90AA1/PSMD12/BACH1/NEK10/NPM1/PSMA7/CEP192/PSMB7/PSMD14/PSMD5/CEP290	16
GO:0007369	gastrulation	7/1007	56/16374	0.0547631	0.372353	0.335552	TGFBR2/RACK1/RPS6/TP53/SUPT20H/TENM4/EXT1	7
GO:0007589	body fluid secretion	5/1007	34/16374	0.0550669	0.372353	0.335552	ANXA2/WNK3/ATG5/SYTL2/PRKCE	5
GO:0010259	multicellular organism aging	5/1007	34/16374	0.0550669	0.372353	0.335552	CRYAB/PRDM2/TP53/WRN/SERP1	5
GO:0042059	negative regulation of epidermal growth factor receptor signaling pathway	5/1007	34/16374	0.0550669	0.372353	0.335552	EGFR/SH3KBP1/ARHGEF7/STAM/ZFYVE28	5
GO:0042246	tissue regeneration	5/1007	34/16374	0.0550669	0.372353	0.335552	TGFBR2/BIN3/CDKN1A/PTPN12/EZH2	5
GO:0046632	alpha-beta T cell differentiation	5/1007	34/16374	0.0550669	0.372353	0.335552	CBFB/TGFBR2/ANXA1/SH3RF1/RUNX1	5
GO:0034976	response to endoplasmic reticulum stress	12/1007	117/16374	0.0560053	0.377667	0.340341	RACK1/ATF4/UBQLN1/FAF2/VCP/NPLOC4/TNFRSF10B/PPP2CB/MBTPS1/OPA1/EIF2AK3/HSPA1A	12
GO:0045023	G0 to G1 transition	6/1007	45/16374	0.0560415	0.377667	0.340341	RBBP8/RBBP4/RYBP/MDM4/EZH2/TFDP2	6
GO:0071772	response to BMP	8/1007	68/16374	0.0563027	0.378544	0.341131	ACVR1/EGR1/DDX5/UBE2D3/SMAD5/USP15/USP9X/ACVR2A	8
GO:0010586	miRNA metabolic process	4/1007	24/16374	0.0565499	0.378544	0.341131	TENT2/PNPT1/XPO5/TUT7	4
GO:0030111	regulation of Wnt signaling pathway	4/1007	24/16374	0.0565499	0.378544	0.341131	CBFB/ITGA3/RUNX1/SNX3	4
GO:0061726	mitochondrion disassembly	4/1007	24/16374	0.0565499	0.378544	0.341131	USP36/CTTN/VDAC1/FBXW7	4
GO:0071356	cellular response to tumor necrosis factor	19/1007	209/16374	0.056945	0.380552	0.342941	CHI3L1/ADAM17/TMSB4X/GBP2/NFKBIA/ARHGEF2/ACTN4/PSME4/PRPF8/PSMD1/PSMD12/PSMA7/TRAF3/RPS3/ZFAND6/PSMB7/PSMD14/PSMD5/LIMS1	19
GO:0006260	DNA replication	18/1007	197/16374	0.060194	0.400512	0.360928	EGFR/GTPBP4/CACYBP/RBBP8/RBBP4/TP53/DNAJC2/RFC3/WRN/ORC3/WAPL/ATR/NUCKS1/MAP2K4/NUP98/POLA1/ORC4/ZBTB38	18
GO:0045948	positive regulation of translational initiation	3/1007	15/16374	0.0606112	0.400512	0.360928	CDC123/RPS6KB1/DHX29	3
GO:0048026	positive regulation of mRNA splicing, via spliceosome	3/1007	15/16374	0.0606112	0.400512	0.360928	NUP98/PRDX6/HSPA8	3
GO:0061136	regulation of proteasomal protein catabolic process	3/1007	15/16374	0.0606112	0.400512	0.360928	UBB/USP14/PSMD14	3
GO:0071380	cellular response to prostaglandin E stimulus	3/1007	15/16374	0.0606112	0.400512	0.360928	GNG2/GNB1/PRKCE	3
GO:1903827	regulation of cellular protein localization	3/1007	15/16374	0.0606112	0.400512	0.360928	HSP90AA1/KDM1A/HSP90AB1	3
GO:0034329	cell junction assembly	11/1007	106/16374	0.0611046	0.400512	0.360928	VMP1/IL1RAP/SYNDIG1/RAPGEF1/NTN1/FLNA/ACTG1/DLG5/LIMS1/EPHB2/NLGN4Y	11
GO:0046907	intracellular transport	11/1007	106/16374	0.0611046	0.400512	0.360928	CRYAB/HMOX1/ARF1/ANXA2/ICE1/SCFD1/TPR/CEP290/PRR5L/STX18/WWC1	11
GO:0001503	ossification	21/1007	238/16374	0.0611137	0.400512	0.360928	HSPE1/ACVR1/EGFR/HNRNPU/DHX36/IARS/DDX21/CBFB/GTPBP4/TMEM38B/RPS15/SNRNP200/ADAR/RRAS2/WWTR1/RPL38/EIF2AK3/CHSY1/EXT1/DDR2/TGFB2	21
GO:0019985	translesion synthesis	5/1007	35/16374	0.0611324	0.400512	0.360928	UBB/RFC3/VCP/RPS27A/UBC	5
GO:0030177	positive regulation of Wnt signaling pathway	5/1007	35/16374	0.0611324	0.400512	0.360928	DIXDC1/SULF2/MBD2/SMARCA4/CSNK2A1	5
GO:0060042	retina morphogenesis in camera-type eye	5/1007	35/16374	0.0611324	0.400512	0.360928	MEGF11/MAN2A1/DSCAM/DLL1/NECTIN3	5
GO:0001654	eye development	15/1007	158/16374	0.0623918	0.401467	0.361788	CRYAB/EGFR/SIPA1L3/TGFBR2/XRN2/CHD7/GNB1/DLL1/RPL24/TENT2/OPA1/RAB18/SMOC1/EPHB2/TGFB2	15
GO:0009790	embryo development	10/1007	94/16374	0.0628888	0.401467	0.361788	DHX36/HSF1/MBD2/SATB2/YTHDF2/TP53/SMAD5/ACSL4/PPP2R3A/PDGFC	10
GO:0048675	axon extension	10/1007	94/16374	0.0628888	0.401467	0.361788	DRAXIN/NRCAM/ITGB1/CTTN/DSCAM/HSP90AA1/WDR36/NTN1/USP9X/HSP90AB1	10
GO:0007612	learning	7/1007	58/16374	0.0639998	0.401467	0.361788	VDAC1/SLC24A2/CNTNAP2/VDAC3/FGF13/EPHB2/NLGN4Y	7
GO:0033138	positive regulation of peptidyl-serine phosphorylation	9/1007	82/16374	0.0641908	0.401467	0.361788	CD44/EGFR/MAPKAP1/TXN/RAF1/HSP90AA1/RPTOR/HSP90AB1/FNIP2	9
GO:0040011	locomotion	9/1007	82/16374	0.0641908	0.401467	0.361788	EGFR/CDK6/ABL2/ROCK2/RAF1/DAPK3/NTN1/CRK/FRMD5	9
GO:0000462	maturation of SSU-rRNA from tricistronic rRNA transcript (SSU-rRNA, 5.8S rRNA, LSU-rRNA)	2/1007	7/16374	0.0645383	0.401467	0.361788	RCL1/RPS19	2
GO:0007033	vacuole organization	2/1007	7/16374	0.0645383	0.401467	0.361788	ANXA2/MAN2A1	2
GO:0007253	cytoplasmic sequestering of NF-kappaB	2/1007	7/16374	0.0645383	0.401467	0.361788	TMSB4X/NFKBIA	2
GO:0019054	modulation by virus of host cellular process	2/1007	7/16374	0.0645383	0.401467	0.361788	KPNB1/KPNA1	2
GO:0034551	mitochondrial respiratory chain complex III assembly	2/1007	7/16374	0.0645383	0.401467	0.361788	SLC25A33/UQCC1	2
GO:0034616	response to laminar fluid shear stress	2/1007	7/16374	0.0645383	0.401467	0.361788	ABCA1/ADAM9	2
GO:0034720	histone H3-K4 demethylation	2/1007	7/16374	0.0645383	0.401467	0.361788	KDM5A/KDM1A	2
GO:0035234	ectopic germ cell programmed cell death	2/1007	7/16374	0.0645383	0.401467	0.361788	PRKDC/KITLG	2
GO:0035510	DNA dealkylation	2/1007	7/16374	0.0645383	0.401467	0.361788	OTUD4/USP9X	2
GO:0036480	neuron intrinsic apoptotic signaling pathway in response to oxidative stress	2/1007	7/16374	0.0645383	0.401467	0.361788	FBXW7/MCL1	2
GO:0044829	positive regulation by host of viral genome replication	2/1007	7/16374	0.0645383	0.401467	0.361788	NUCKS1/HSPA8	2
GO:0045162	clustering of voltage-gated sodium channels	2/1007	7/16374	0.0645383	0.401467	0.361788	NRCAM/NFASC	2
GO:0060717	chorion development	2/1007	7/16374	0.0645383	0.401467	0.361788	DNAJB6/MAP3K4	2
GO:0070100	negative regulation of chemokine-mediated signaling pathway	2/1007	7/16374	0.0645383	0.401467	0.361788	SLIT2/ROBO1	2
GO:0071494	cellular response to UV-C	2/1007	7/16374	0.0645383	0.401467	0.361788	MDM2/TP53	2
GO:0071971	extracellular exosome assembly	2/1007	7/16374	0.0645383	0.401467	0.361788	STAM/SDCBP	2
GO:0090267	positive regulation of mitotic cell cycle spindle assembly checkpoint	2/1007	7/16374	0.0645383	0.401467	0.361788	TPR/PCID2	2
GO:0097549	chromatin organization involved in negative regulation of transcription	2/1007	7/16374	0.0645383	0.401467	0.361788	SMCHD1/TPR	2
GO:0098789	pre-mRNA cleavage required for polyadenylation	2/1007	7/16374	0.0645383	0.401467	0.361788	CPSF6/NUDT21	2
GO:0099624	atrial cardiac muscle cell membrane repolarization	2/1007	7/16374	0.0645383	0.401467	0.361788	FLNA/CACNA1D	2
GO:1990791	dorsal root ganglion development	2/1007	7/16374	0.0645383	0.401467	0.361788	CTNNB1/NRP2	2
GO:2000394	positive regulation of lamellipodium morphogenesis	2/1007	7/16374	0.0645383	0.401467	0.361788	CORO1C/ARHGEF7	2
GO:2000483	negative regulation of interleukin-8 secretion	2/1007	7/16374	0.0645383	0.401467	0.361788	TMSB4X/ANXA1	2
GO:2000543	positive regulation of gastrulation	2/1007	7/16374	0.0645383	0.401467	0.361788	RACK1/TENM4	2
GO:2000650	negative regulation of sodium ion transmembrane transporter activity	2/1007	7/16374	0.0645383	0.401467	0.361788	CAMK2D/PRKCE	2
GO:0000045	autophagosome assembly	8/1007	70/16374	0.0647179	0.401467	0.361788	VMP1/ATG5/AMBRA1/UBQLN1/IFT20/SCFD1/BAG3/PSEN1	8
GO:0007167	enzyme linked receptor protein signaling pathway	8/1007	70/16374	0.0647179	0.401467	0.361788	ACVR1/TGFBR2/VIM/SMAD5/USP15/SUB1/PDGFC/TGFB2	8
GO:0008630	intrinsic apoptotic signaling pathway in response to DNA damage	8/1007	70/16374	0.0647179	0.401467	0.361788	CD44/HMOX1/RPL26/TPT1/RPS3/MARCH7/KDM1A/FNIP2	8
GO:0097190	apoptotic signaling pathway	20/1007	226/16374	0.0647883	0.401467	0.361788	ACVR1/BIRC6/CTTN/RACK1/RAF1/TP53/GCLM/SH3RF1/DAPK3/HIP1/DAP3/CSNK2A1/CTNNB1/RPS3/CYLD/RB1CC1/URI1/DIDO1/PAWR/PSEN1	20
GO:0007420	brain development	25/1007	295/16374	0.0649522	0.401849	0.362132	DRAXIN/SHROOM4/PRKDC/MNAT1/CTTNBP2/TGFBR2/TAF1/ATP2B1/WRN/GRIN2B/DNAJB1/KDM7A/DSCAML1/CTNNB1/UBE3A/TBC1D23/BAG3/PCDH19/CEP290/DLG5/RAB18/SPATA5/ACSL3/CNTNAP2/PSEN1	25
GO:0022008	neurogenesis	26/1007	309/16374	0.0650507	0.401849	0.362132	GAP43/PRTG/SPOCK1/NRCAM/MAN2A1/XRN2/ITGA3/ARHGEF2/SOX4/SATB2/CHD7/MATN2/DLL1/ATF4/SH3RF1/DAPK3/TENT2/NTN1/CRK/NAV2/CTNNB1/USP9X/EZH2/PSEN1/FGF13/TGFB2	26
GO:0009615	response to virus	12/1007	120/16374	0.06539	0.403322	0.363461	CDK6/ODC1/HMGA2/IFIT2/IFIT3/ADAR/CCT5/PCBP2/TPT1/TRAF3/URI1/HSPB1	12
GO:0007173	epidermal growth factor receptor signaling pathway	10/1007	95/16374	0.0666091	0.409701	0.369208	EGFR/ADAM17/SH3KBP1/DGKD/HIP1/PTPN12/ARHGEF7/STAM/ZFYVE28/GAREM1	10
GO:0003407	neural retina development	6/1007	47/16374	0.0667312	0.409701	0.369208	MEGF11/DSCAM/SMARCA4/ATP2B1/PSEN1/TGFB2	6
GO:0007040	lysosome organization	6/1007	47/16374	0.0667312	0.409701	0.369208	ARF1/RAB39A/LYST/TMEM165/ABCA1/MBTPS1	6
GO:0071479	cellular response to ionizing radiation	5/1007	36/16374	0.0675606	0.413525	0.372654	HMGA2/CDKN1A/TP53/NAMPT/IFI16	5
GO:1904646	cellular response to amyloid-beta	5/1007	36/16374	0.0675606	0.413525	0.372654	IGF1R/LGMN/NAMPT/CACNA1A/PSEN1	5
GO:0000280	nuclear division	11/1007	108/16374	0.0680381	0.415811	0.374715	BCCIP/KPNB1/ZNF207/PIBF1/DAPK3/RPL24/CDK13/PPP2R2D/FLNA/CEP192/KIF2A	11
GO:0006325	chromatin organization	13/1007	134/16374	0.0688808	0.42032	0.378778	HNRNPU/BUD23/HMGA2/SS18L1/PSME4/SMARCA4/DNAJC2/DAPK3/CHD2/NUCKS1/SAFB/EZH2/AEBP2	13
GO:0038127	ERBB signaling pathway	8/1007	71/16374	0.0692025	0.420361	0.378815	EGFR/SH3KBP1/LGMN/HIP1/PTPN12/ARHGEF7/STAM/ZFYVE28	8
GO:0042795	snRNA transcription by RNA polymerase II	8/1007	71/16374	0.0692025	0.420361	0.378815	ELL2/ICE1/POLR2F/POLR2B/RPRD1A/CCNT1/POLR2A/GTF2F2	8
GO:0060326	cell chemotaxis	8/1007	71/16374	0.0692025	0.420361	0.378815	ADAM17/TMSB4X/LGMN/ABCC1/CRK/IL6R/SLIT2/HSPB1	8
GO:0090090	negative regulation of canonical Wnt signaling pathway	15/1007	161/16374	0.0709718	0.427939	0.385644	DRAXIN/EGR1/MCC/G3BP1/PSME4/RAPGEF1/PSMD1/PTPRO/WWTR1/PSMD12/PSMA7/CYLD/PSMB7/PSMD14/PSMD5	15
GO:0008033	tRNA processing	3/1007	16/16374	0.0713053	0.427939	0.385644	TYW1/SARS/TYW1B	3
GO:0010633	negative regulation of epithelial cell migration	3/1007	16/16374	0.0713053	0.427939	0.385644	MCC/STRAP/CORO1C	3
GO:0035988	chondrocyte proliferation	3/1007	16/16374	0.0713053	0.427939	0.385644	MMP16/HMGA2/DDR2	3
GO:0042326	negative regulation of phosphorylation	3/1007	16/16374	0.0713053	0.427939	0.385644	CDKN1A/DYNLL1/PRKRIP1	3
GO:0062197	cellular response to chemical stress	3/1007	16/16374	0.0713053	0.427939	0.385644	MAPKAP1/HMOX1/TP53	3
GO:1901379	regulation of potassium ion transmembrane transport	3/1007	16/16374	0.0713053	0.427939	0.385644	DPP6/KCNIP4/CACNA1D	3
GO:1902166	negative regulation of intrinsic apoptotic signaling pathway in response to DNA damage by p53 class mediator	3/1007	16/16374	0.0713053	0.427939	0.385644	CD44/MARCH7/KDM1A	3
GO:0010631	epithelial cell migration	14/1007	148/16374	0.0717132	0.429742	0.387269	TGFBR2/MCC/ITGA3/EPB41L4B/STRAP/ROCK2/ADAMTS9/PRKCE/CORO1C/NRP2/ADAM9/DNAJA4/SLIT2/TGFB2	14
GO:0007205	protein kinase C-activating G protein-coupled receptor signaling pathway	4/1007	26/16374	0.072309	0.430733	0.388162	GAP43/DGKH/DGKD/DGKI	4
GO:0039694	viral RNA genome replication	4/1007	26/16374	0.072309	0.430733	0.388162	EEA1/HMGA2/ROCK2/PCBP2	4
GO:0070911	global genome nucleotide-excision repair	4/1007	26/16374	0.072309	0.430733	0.388162	UBB/RPS27A/XPC/UBC	4
GO:0071158	positive regulation of cell cycle arrest	4/1007	26/16374	0.072309	0.430733	0.388162	HMGA2/TP53/RPL23/UHRF2	4
GO:0034620	cellular response to unfolded protein	6/1007	48/16374	0.072491	0.431176	0.388561	HSF1/VCP/MBTPS1/BAG3/EIF2AK3/HSPA1A	6
GO:0044257	cellular protein catabolic process	7/1007	60/16374	0.0741256	0.437265	0.394048	ANXA2/MDM2/HSP90AA1/LGMN/CAPN2/RDX/LONP1	7
GO:0051225	spindle assembly	7/1007	60/16374	0.0741256	0.437265	0.394048	HNRNPU/TNKS/RPS3/TPR/STARD9/HSPA1A/RNF4	7
GO:0002755	MyD88-dependent toll-like receptor signaling pathway	5/1007	37/16374	0.0743488	0.437265	0.394048	HSPD1/MAP3K7/UBB/RPS27A/UBC	5
GO:0006493	protein O-linked glycosylation	5/1007	37/16374	0.0743488	0.437265	0.394048	TRAK2/GALNT2/GALNT10/GALNT7/LARGE1	5
GO:0010927	cellular component assembly involved in morphogenesis	5/1007	37/16374	0.0743488	0.437265	0.394048	ITGB1/NFASC/TPM1/ACTG1/FHOD3	5
GO:0042307	positive regulation of protein import into nucleus	5/1007	37/16374	0.0743488	0.437265	0.394048	IPO5/FLNA/TPR/BAG3/PSEN1	5
GO:0051262	protein tetramerization	5/1007	37/16374	0.0743488	0.437265	0.394048	IGF1R/TP53/CPSF6/NUDT21/RPS19	5
GO:0050900	leukocyte migration	17/1007	189/16374	0.0743885	0.437265	0.394048	CD44/HMOX1/ANGPT2/ADAM17/ITGB1/ITGA3/JAM3/SLC7A5/ANXA1/SLC7A6/ATP1B3/TNFRSF10B/PPIA/IL6R/SLIT2/SDC3/KITLG	17
GO:0016049	cell growth	22/1007	258/16374	0.0754435	0.442816	0.399051	CAMK2D/SPOCK1/CRYAB/EGFR/SERPINE2/ADAM17/RPS6KA3/GNG4/CDKN1A/RACK1/TP53/SMARCA4/RPTOR/BLZF1/CSNK2A1/SLC25A33/DCBLD2/URI1/SLIT2/HSPA1A/SDCBP/TGFB2	22
GO:0071230	cellular response to amino acid stimulus	6/1007	49/16374	0.0785263	0.454535	0.409612	EGFR/LARS/IPO5/RPTOR/CAPN2/PDGFC	6
GO:0045669	positive regulation of osteoblast differentiation	7/1007	61/16374	0.0795224	0.454535	0.409612	ACVR1/FBN2/SMAD5/CTNNB1/IL6R/ACVR2A/DDR2	7
GO:0097192	extrinsic apoptotic signaling pathway in absence of ligand	7/1007	61/16374	0.0795224	0.454535	0.409612	MKNK2/STRADB/DAPK3/MCL1/BAG3/HSPA1A/KITLG	7
GO:0007409	axonogenesis	24/1007	288/16374	0.0804188	0.454535	0.409612	TRAK2/DRAXIN/NRCAM/UST/S100A6/TIAM1/ITGB1/DSCAM/NFASC/MATN2/SH3KBP1/PTPRO/HSP90AA1/DSCAML1/NRP2/USP9X/HSP90AB1/PITPNA/SLIT2/PSEN1/EXT1/PAK3/EPHB2/ROBO1	24
GO:0003148	outflow tract septum morphogenesis	4/1007	27/16374	0.0809394	0.454535	0.409612	TGFBR2/NRP2/ROBO1/TGFB2	4
GO:0003197	endocardial cushion development	4/1007	27/16374	0.0809394	0.454535	0.409612	ACVR1/MDM2/MDM4/TGFB2	4
GO:0042982	amyloid precursor protein metabolic process	4/1007	27/16374	0.0809394	0.454535	0.409612	BACE2/ROCK2/PAWR/PSEN1	4
GO:0070536	protein K63-linked deubiquitination	4/1007	27/16374	0.0809394	0.454535	0.409612	OTUD4/VCP/CYLD/PSMD14	4
GO:0007223	Wnt signaling pathway, calcium modulating pathway	5/1007	38/16374	0.081493	0.454535	0.409612	GNG2/GNB1/MAP3K7/CTNNB1/NLK	5
GO:0030036	actin cytoskeleton organization	20/1007	233/16374	0.0825126	0.454535	0.409612	SHROOM4/DIXDC1/FMNL3/ARF1/TMSB4X/MKL1/BIN3/ARHGEF2/ABL2/ROCK2/DAPK3/DNAJB6/CRK/MTSS1/CORO1C/CAPZB/ELMO1/TMSB10/SDCBP/FHOD3	20
GO:0000733	DNA strand renaturation	2/1007	8/16374	0.0826243	0.454535	0.409612	TP53/ZRANB3	2
GO:0001959	regulation of cytokine-mediated signaling pathway	2/1007	8/16374	0.0826243	0.454535	0.409612	CBFB/RUNX1	2
GO:0003174	mitral valve development	2/1007	8/16374	0.0826243	0.454535	0.409612	ACVR1/SOX4	2
GO:0006271	DNA strand elongation involved in DNA replication	2/1007	8/16374	0.0826243	0.454535	0.409612	RFC3/POLA1	2
GO:0007270	neuron-neuron synaptic transmission	2/1007	8/16374	0.0826243	0.454535	0.409612	VDAC1/VDAC3	2
GO:0018243	protein O-linked glycosylation via threonine	2/1007	8/16374	0.0826243	0.454535	0.409612	GALNT13/GALNT2	2
GO:0021955	central nervous system neuron axonogenesis	2/1007	8/16374	0.0826243	0.454535	0.409612	HSP90AA1/HSP90AB1	2
GO:0031642	negative regulation of myelination	2/1007	8/16374	0.0826243	0.454535	0.409612	MTMR2/EIF2AK3	2
GO:0035331	negative regulation of hippo signaling	2/1007	8/16374	0.0826243	0.454535	0.409612	DLG5/WWC1	2
GO:0042753	positive regulation of circadian rhythm	2/1007	8/16374	0.0826243	0.454535	0.409612	FBXW11/ARNTL2	2
GO:0046784	viral mRNA export from host cell nucleus	2/1007	8/16374	0.0826243	0.454535	0.409612	THOC2/THOC1	2
GO:0047497	mitochondrion transport along microtubule	2/1007	8/16374	0.0826243	0.454535	0.409612	LRPPRC/UBB	2
GO:0051304	chromosome separation	2/1007	8/16374	0.0826243	0.454535	0.409612	CSNK2A1/TPR	2
GO:0060261	positive regulation of transcription initiation from RNA polymerase II promoter	2/1007	8/16374	0.0826243	0.454535	0.409612	DHX36/TAF1	2
GO:0071233	cellular response to leucine	2/1007	8/16374	0.0826243	0.454535	0.409612	LARS/RPTOR	2
GO:0072160	nephron tubule epithelial cell differentiation	2/1007	8/16374	0.0826243	0.454535	0.409612	MTSS1/CTNNB1	2
GO:0090091	positive regulation of extracellular matrix disassembly	2/1007	8/16374	0.0826243	0.454535	0.409612	PDPN/DDR2	2
GO:0090279	regulation of calcium ion import	2/1007	8/16374	0.0826243	0.454535	0.409612	WNK3/CTNNB1	2
GO:0090650	cellular response to oxygen-glucose deprivation	2/1007	8/16374	0.0826243	0.454535	0.409612	ATF4/NAMPT	2
GO:0098909	regulation of cardiac muscle cell action potential involved in regulation of contraction	2/1007	8/16374	0.0826243	0.454535	0.409612	CAMK2D/FGF13	2
GO:1900027	regulation of ruffle assembly	2/1007	8/16374	0.0826243	0.454535	0.409612	CORO1C/RDX	2
GO:1900246	positive regulation of RIG-I signaling pathway	2/1007	8/16374	0.0826243	0.454535	0.409612	PUM2/PUM1	2
GO:1902966	positive regulation of protein localization to early endosome	2/1007	8/16374	0.0826243	0.454535	0.409612	ROCK2/RDX	2
GO:1903115	regulation of actin filament-based movement	2/1007	8/16374	0.0826243	0.454535	0.409612	CAMK2D/FGF13	2
GO:2000643	positive regulation of early endosome to late endosome transport	2/1007	8/16374	0.0826243	0.454535	0.409612	MTMR2/RDX	2
GO:0003184	pulmonary valve morphogenesis	3/1007	17/16374	0.082777	0.454535	0.409612	SLIT2/ROBO1/TGFB2	3
GO:0003198	epithelial to mesenchymal transition involved in endocardial cushion formation	3/1007	17/16374	0.082777	0.454535	0.409612	ACVR1/TGFBR2/TGFB2	3
GO:0006613	cotranslational protein targeting to membrane	3/1007	17/16374	0.082777	0.454535	0.409612	SRP54/SRP14/SRP19	3
GO:0010812	negative regulation of cell-substrate adhesion	3/1007	17/16374	0.082777	0.454535	0.409612	SPOCK1/ANGPT2/PTPRO	3
GO:0031293	membrane protein intracellular domain proteolysis	3/1007	17/16374	0.082777	0.454535	0.409612	ADAM17/MBTPS1/PSEN1	3
GO:0043330	response to exogenous dsRNA	3/1007	17/16374	0.082777	0.454535	0.409612	DHX36/DDX21/NFKBIA	3
GO:0043367	CD4-positive, alpha-beta T cell differentiation	3/1007	17/16374	0.082777	0.454535	0.409612	CBFB/SH3RF1/RUNX1	3
GO:0045109	intermediate filament organization	3/1007	17/16374	0.082777	0.454535	0.409612	AGFG1/VIM/DNAJB6	3
GO:0045616	regulation of keratinocyte differentiation	3/1007	17/16374	0.082777	0.454535	0.409612	CBFB/ROCK2/RUNX1	3
GO:0046425	regulation of receptor signaling pathway via JAK-STAT	3/1007	17/16374	0.082777	0.454535	0.409612	PIBF1/DOT1L/NLK	3
GO:0070131	positive regulation of mitochondrial translation	3/1007	17/16374	0.082777	0.454535	0.409612	TRMT10C/UQCC1/FASTKD2	3
GO:2000811	negative regulation of anoikis	3/1007	17/16374	0.082777	0.454535	0.409612	ITGB1/PTRH2/MCL1	3
GO:0043687	post-translational protein modification	28/1007	346/16374	0.0835994	0.458422	0.413115	SPSB1/RNF7/FEM1C/PRSS23/FBXO32/PSME4/SKP1/PSMD1/ATG5/RBBP5/PSMD12/SPP1/VGF/COPS8/FBXW7/LRRC41/PSMA7/FBXW11/KLHL20/PSMB7/KLHL42/MBTPS1/PSMD14/FBXO22/PSMD5/SOCS6/DCAF7/LAMC1	28
GO:0032481	positive regulation of type I interferon production	6/1007	50/16374	0.0848354	0.464564	0.418649	DHX36/PRKDC/POLR2F/CTNNB1/IFI16/POLR3A	6
GO:0007584	response to nutrient	7/1007	62/16374	0.0851409	0.4656	0.419583	ENSA/TGFBR2/GCLM/POR/ACSL4/ABCA1/ACSL3	7
GO:0006354	DNA-templated transcription, elongation	5/1007	39/16374	0.0889879	0.483993	0.436158	HNRNPU/THOC1/RNF168/EZH2/EAPP	5
GO:0007566	embryo implantation	5/1007	39/16374	0.0889879	0.483993	0.436158	VMP1/FKBP4/TGFBR2/SPP1/RPL29	5
GO:0009968	negative regulation of signal transduction	5/1007	39/16374	0.0889879	0.483993	0.436158	ACVR1/RGS17/SOCS6/RGS6/PRR5L	5
GO:0070317	negative regulation of G0 to G1 transition	5/1007	39/16374	0.0889879	0.483993	0.436158	RBBP8/RBBP4/RYBP/EZH2/TFDP2	5
GO:0030970	retrograde protein transport, ER to cytosol	4/1007	28/16374	0.0900529	0.487796	0.439586	HM13/FAF2/VCP/NPLOC4	4
GO:0048147	negative regulation of fibroblast proliferation	4/1007	28/16374	0.0900529	0.487796	0.439586	FTH1/TP53/MORC3/PAWR	4
GO:0050654	chondroitin sulfate proteoglycan metabolic process	4/1007	28/16374	0.0900529	0.487796	0.439586	CHST15/CHST11/CHSY1/DSEL	4
GO:0017038	protein import	7/1007	63/16374	0.0909801	0.490827	0.442317	IPO5/NUP58/FLNA/TPR/BAG3/PSEN1/HSPA8	7
GO:0046034	ATP metabolic process	7/1007	63/16374	0.0909801	0.490827	0.442317	TMSB4X/VCP/SLC25A33/GUK1/HSPA1A/ATP6V1A/HSPA8	7
GO:0048207	vesicle targeting, rough ER to cis-Golgi	7/1007	63/16374	0.0909801	0.490827	0.442317	SEC31A/PPP6R3/SEC23IP/TRAPPC10/SCFD1/CNIH3/ANKRD28	7
GO:0006383	transcription by RNA polymerase III	6/1007	51/16374	0.0914156	0.49185	0.443239	DHX36/ICE1/POLR2F/RPTOR/TROVE2/POLR3A	6
GO:0033077	T cell differentiation in thymus	6/1007	51/16374	0.0914156	0.49185	0.443239	CDK6/PRKDC/ADAM17/RPS6/TP53/CTNNB1	6
GO:0007254	JNK cascade	15/1007	168/16374	0.0939169	0.50093	0.451421	GRIK2/EGFR/MAP4K5/IGF1R/RAPGEF1/MAP3K20/MAP3K7/UBB/SH3RF1/MAP2K4/CYLD/RPS27A/RB1CC1/SDCBP/UBC	15
GO:0001933	negative regulation of protein phosphorylation	8/1007	76/16374	0.0944109	0.50093	0.451421	PRKDC/WWTR1/CORO1C/WARS/PRR5L/PAQR3/SLIT2/EPHB2	8
GO:0009749	response to glucose	8/1007	76/16374	0.0944109	0.50093	0.451421	EGR1/ANGPT2/ENSA/ILDR2/TGFBR2/RAF1/EIF2B1/EIF2B3	8
GO:0051170	import into nucleus	8/1007	76/16374	0.0944109	0.50093	0.451421	SNRPD3/SNRPD1/IPO5/NUP58/FLNA/TPR/BAG3/PSEN1	8
GO:0001709	cell fate determination	3/1007	18/16374	0.0949802	0.50093	0.451421	DLL1/DSCAML1/MCL1	3
GO:0034063	stress granule assembly	3/1007	18/16374	0.0949802	0.50093	0.451421	G3BP1/RPS23/PUM2	3
GO:0035269	protein O-linked mannosylation	3/1007	18/16374	0.0949802	0.50093	0.451421	DPM1/LARGE1/TMTC1	3
GO:0035458	cellular response to interferon-beta	3/1007	18/16374	0.0949802	0.50093	0.451421	PNPT1/CAPN2/IFI16	3
GO:0045638	negative regulation of myeloid cell differentiation	3/1007	18/16374	0.0949802	0.50093	0.451421	CDK6/NFKBIA/DLL1	3
GO:0046470	phosphatidylcholine metabolic process	3/1007	18/16374	0.0949802	0.50093	0.451421	LDLR/CAPN2/ACSL3	3
GO:0050730	regulation of peptidyl-tyrosine phosphorylation	3/1007	18/16374	0.0949802	0.50093	0.451421	EGFR/PRKCE/PDGFC	3
GO:0060317	cardiac epithelial to mesenchymal transition	3/1007	18/16374	0.0949802	0.50093	0.451421	ACVR1/TGFBR2/TGFB2	3
GO:0071404	cellular response to low-density lipoprotein particle stimulus	3/1007	18/16374	0.0949802	0.50093	0.451421	ITGB1/LDLR/ABCA1	3
GO:0098927	vesicle-mediated transport between endosomal compartments	3/1007	18/16374	0.0949802	0.50093	0.451421	MTMR2/RDX/SNX3	3
GO:1904706	negative regulation of vascular smooth muscle cell proliferation	3/1007	18/16374	0.0949802	0.50093	0.451421	HMOX1/CDKN1A/TPM1	3
GO:0030334	regulation of cell migration	7/1007	64/16374	0.0970383	0.50977	0.459387	SERPINE2/DOCK10/NTN1/FLNA/LMO4/FRMD5/KIF2A	7
GO:0048208	COPII vesicle coating	7/1007	64/16374	0.0970383	0.50977	0.459387	SEC31A/PPP6R3/SEC23IP/TRAPPC10/SCFD1/CNIH3/ANKRD28	7
GO:0072594	establishment of protein localization to organelle	7/1007	64/16374	0.0970383	0.50977	0.459387	IPO5/NUP58/FLNA/DNAJA1/TPR/BAG3/PSEN1	7
GO:0000289	nuclear-transcribed mRNA poly(A) tail shortening	4/1007	29/16374	0.0996336	0.515012	0.464111	PABPC1/TUT7/CNOT2/TENT4A	4
GO:0010800	positive regulation of peptidyl-threonine phosphorylation	4/1007	29/16374	0.0996336	0.515012	0.464111	CHI3L1/WNK3/RPTOR/CEMIP	4
GO:0018205	peptidyl-lysine modification	4/1007	29/16374	0.0996336	0.515012	0.464111	EGR1/MDM2/GNL3/CTNNB1	4
GO:0043001	Golgi to plasma membrane protein transport	4/1007	29/16374	0.0996336	0.515012	0.464111	RACK1/BLZF1/RAB31/ACSL3	4
GO:0045880	positive regulation of smoothened signaling pathway	4/1007	29/16374	0.0996336	0.515012	0.464111	PRRX1/POR/DLG5/CHSY1	4
GO:0045931	positive regulation of mitotic cell cycle	4/1007	29/16374	0.0996336	0.515012	0.464111	MDM2/HSF1/LGMN/RPS6KB1	4
GO:0046661	male sex differentiation	4/1007	29/16374	0.0996336	0.515012	0.464111	LHFPL2/FKBP4/SMAD5/CTNNB1	4
GO:0001188	RNA polymerase I preinitiation complex assembly	2/1007	9/16374	0.102025	0.515012	0.464111	RRN3/SMARCA4	2
GO:0002315	marginal zone B cell differentiation	2/1007	9/16374	0.102025	0.515012	0.464111	DOCK10/DLL1	2
GO:0002507	tolerance induction	2/1007	9/16374	0.102025	0.515012	0.464111	TGFBR2/MARCH7	2
GO:0006379	mRNA cleavage	2/1007	9/16374	0.102025	0.515012	0.464111	CSTF3/NUDT21	2
GO:0007191	adenylate cyclase-activating dopamine receptor signaling pathway	2/1007	9/16374	0.102025	0.515012	0.464111	GNG2/GNB1	2
GO:0032731	positive regulation of interleukin-1 beta production	2/1007	9/16374	0.102025	0.515012	0.464111	IFI16/HSPB1	2
GO:0032836	glomerular basement membrane development	2/1007	9/16374	0.102025	0.515012	0.464111	SULF2/MYO1E	2
GO:0035562	negative regulation of chromatin binding	2/1007	9/16374	0.102025	0.515012	0.464111	BTAF1/WAPL	2
GO:0042983	amyloid precursor protein biosynthetic process	2/1007	9/16374	0.102025	0.515012	0.464111	BACE2/PAWR	2
GO:0045080	positive regulation of chemokine biosynthetic process	2/1007	9/16374	0.102025	0.515012	0.464111	HMOX1/EGR1	2
GO:0048263	determination of dorsal identity	2/1007	9/16374	0.102025	0.515012	0.464111	ACVR1/CTNNB1	2
GO:0048703	embryonic viscerocranium morphogenesis	2/1007	9/16374	0.102025	0.515012	0.464111	CHST11/MTHFD1L	2
GO:0050931	pigment cell differentiation	2/1007	9/16374	0.102025	0.515012	0.464111	ADAMTS9/KITLG	2
GO:0051302	regulation of cell division	2/1007	9/16374	0.102025	0.515012	0.464111	RACK1/DLL1	2
GO:0061549	sympathetic ganglion development	2/1007	9/16374	0.102025	0.515012	0.464111	CTNNB1/NRP2	2
GO:0070417	cellular response to cold	2/1007	9/16374	0.102025	0.515012	0.464111	NFKBIA/EIF2AK3	2
GO:0071225	cellular response to muramyl dipeptide	2/1007	9/16374	0.102025	0.515012	0.464111	ARHGEF2/VIM	2
GO:0071394	cellular response to testosterone stimulus	2/1007	9/16374	0.102025	0.515012	0.464111	ROCK2/SPP1	2
GO:0072110	glomerular mesangial cell proliferation	2/1007	9/16374	0.102025	0.515012	0.464111	EGR1/IL6R	2
GO:0098974	postsynaptic actin cytoskeleton organization	2/1007	9/16374	0.102025	0.515012	0.464111	ARF1/ACTG1	2
GO:0099010	modification of postsynaptic structure	2/1007	9/16374	0.102025	0.515012	0.464111	CTTNBP2/TIAM1	2
GO:1902946	protein localization to early endosome	2/1007	9/16374	0.102025	0.515012	0.464111	ROCK2/RDX	2
GO:1903799	negative regulation of production of miRNAs involved in gene silencing by miRNA	2/1007	9/16374	0.102025	0.515012	0.464111	TP53/NCOR2	2
GO:1990314	cellular response to insulin-like growth factor stimulus	2/1007	9/16374	0.102025	0.515012	0.464111	CRK/SLC25A33	2
GO:0048870	cell motility	33/1007	427/16374	0.104019	0.52442	0.472589	ACVR1/EGFR/SERPINE2/CDK6/GTPBP4/ADAM17/TIAM1/ITGB1/CTTN/IGF1R/ACTN4/DOCK10/ABL2/ROCK2/RACK1/RAF1/RRAS2/DAPK3/NTN1/CRK/TPM1/FLNA/LMO4/PDPN/FRMD5/ELMO1/RDX/KIF2A/DLG5/SLIT2/SDCBP/CEMIP/ROBO1	33
GO:0036503	ERAD pathway	5/1007	41/16374	0.105003	0.528714	0.476459	UBQLN1/FAF2/VCP/NPLOC4/USP14	5
GO:0006810	transport	11/1007	117/16374	0.105319	0.529258	0.476949	CRYAB/EEA1/S100A10/ARF1/ANXA2/TP53/ACTG1/CEP83/ACSL3/FGF14/WWC1	11
GO:0003205	cardiac chamber development	6/1007	53/16374	0.105376	0.529258	0.476949	HECTD1/MDM2/DCTN5/MDM4/ADAMTS6/LMO4	6
GO:0038096	Fc-gamma receptor signaling pathway involved in phagocytosis	8/1007	78/16374	0.105785	0.530649	0.478203	RAPGEF1/HSP90AA1/CRK/PRKCE/ACTG1/ELMO1/ARPC2/HSP90AB1	8
GO:0003177	pulmonary valve development	3/1007	19/16374	0.107866	0.535717	0.48277	SLIT2/ROBO1/TGFB2	3
GO:0006893	Golgi to plasma membrane transport	3/1007	19/16374	0.107866	0.535717	0.48277	RACK1/CCDC93/ACSL3	3
GO:0035338	long-chain fatty-acyl-CoA biosynthetic process	3/1007	19/16374	0.107866	0.535717	0.48277	ACSL4/ELOVL5/ACSL3	3
GO:0043393	regulation of protein binding	3/1007	19/16374	0.107866	0.535717	0.48277	CRK/CYLD/UBASH3B	3
GO:0050767	regulation of neurogenesis	3/1007	19/16374	0.107866	0.535717	0.48277	CHD7/DLL1/CTNNB1	3
GO:0050919	negative chemotaxis	3/1007	19/16374	0.107866	0.535717	0.48277	NRP2/SLIT2/ROBO1	3
GO:0051641	cellular localization	3/1007	19/16374	0.107866	0.535717	0.48277	CAMK2D/CRYAB/WWC1	3
GO:0099175	regulation of postsynapse organization	3/1007	19/16374	0.107866	0.535717	0.48277	NRCAM/NRP2/HSPA8	3
GO:0007346	regulation of mitotic cell cycle	4/1007	30/16374	0.109664	0.542627	0.488998	HNRNPU/DAPK3/CYLD/SDCBP	4
GO:0032435	negative regulation of proteasomal ubiquitin-dependent protein catabolic process	4/1007	30/16374	0.109664	0.542627	0.488998	RPL11/RYBP/HSP90AB1/SDCBP	4
GO:0032480	negative regulation of type I interferon production	4/1007	30/16374	0.109664	0.542627	0.488998	RNF216/NPLOC4/PCBP2/CYLD	4
GO:0048762	mesenchymal cell differentiation	10/1007	105/16374	0.11144	0.550734	0.496303	TIAM1/HMGA2/TGFBR2/STRAP/WWTR1/CTNNB1/PDPN/EZH2/SDCBP/TGFB2	10
GO:0007266	Rho protein signal transduction	14/1007	159/16374	0.111868	0.552168	0.497595	TIAM1/ITGB1/ITGA3/ARHGEF2/ABL2/ROCK2/MYO9B/RAF1/ARHGEF7/ABCA1/PDPN/DNMBP/FARP2/ROBO1	14
GO:0006096	glycolytic process	9/1007	92/16374	0.112109	0.552675	0.498052	NUP107/NUP160/NUP214/RANBP2/NUP58/NUP153/NUP98/TPR/ECD	9
GO:0001822	kidney development	12/1007	132/16374	0.112809	0.555441	0.500545	SULF2/NUP107/ODC1/NUP160/ITGA3/SOX4/DLL1/WWTR1/IFT20/CTNNB1/DLG5/TGFB2	12
GO:0000725	recombinational repair	5/1007	42/16374	0.113507	0.556825	0.501792	SMCHD1/FUS/ZNF365/RIF1/KDM1A	5
GO:0001707	mesoderm formation	5/1007	42/16374	0.113507	0.556825	0.501792	ACVR1/ITGB1/HMGA2/ITGA3/TXNRD1	5
GO:0009411	response to UV	5/1007	42/16374	0.113507	0.556825	0.501792	RPL26/NPM1/TROVE2/ZRANB3/UBE2B	5
GO:0007005	mitochondrion organization	13/1007	146/16374	0.114751	0.562237	0.506669	MAN2A1/PPRC1/SSBP1/YME1L1/TIMM23/SLC25A33/TIMM44/TOMM7/CEP89/OPA1/LONP1/MTERF1/FNIP2	13
GO:0090114	COPII-coated vesicle budding	7/1007	67/16374	0.116503	0.564984	0.509145	SEC31A/PPP6R3/SEC23IP/TRAPPC10/SCFD1/CNIH3/ANKRD28	7
GO:0045786	negative regulation of cell cycle	9/1007	93/16374	0.117766	0.564984	0.509145	CDK6/MDM2/HMGA2/TP53/MDM4/RPL23/UHRF2/SLC25A33/HSP90AB1	9
GO:0048534	hematopoietic or lymphoid organ development	9/1007	93/16374	0.117766	0.564984	0.509145	CBFB/SIPA1L3/ADAR/TP53/TENT2/RUNX1/ARIH2/IFI16/PSEN1	9
GO:0048813	dendrite morphogenesis	9/1007	93/16374	0.117766	0.564984	0.509145	TRAK2/HPRT1/MEF2A/ITGB1/DOCK10/DSCAM/ZNF365/PAK3/EPHB2	9
GO:0071805	potassium ion transmembrane transport	9/1007	93/16374	0.117766	0.564984	0.509145	DPP6/KCNH1/KCNQ3/TMEM38B/ATP1B3/FLNA/KCNIP4/HCN1/CACNA1D	9
GO:0030307	positive regulation of cell growth	8/1007	80/16374	0.117881	0.564984	0.509145	EGFR/ADAM17/RPS6KA3/RPTOR/CSNK2A1/SLC25A33/SDCBP/TGFB2	8
GO:0008360	regulation of cell shape	11/1007	120/16374	0.119962	0.564984	0.509145	FMNL3/ANXA1/SH3KBP1/DAPK3/PRPF40A/CRK/TPM1/PDPN/ANXA7/RDX/DNMBP	11
GO:0016601	Rac protein signal transduction	4/1007	31/16374	0.120125	0.564984	0.509145	TIAM1/CRK/ELMO1/FARP2	4
GO:0048193	Golgi vesicle transport	4/1007	31/16374	0.120125	0.564984	0.509145	VTI1A/ARF1/SCFD1/STX18	4
GO:0055013	cardiac muscle cell development	4/1007	31/16374	0.120125	0.564984	0.509145	HNRNPU/MEF2A/MAP2K4/FHOD3	4
GO:0030850	prostate gland development	3/1007	20/16374	0.121384	0.564984	0.509145	FKBP4/CTNNB1/UBE3A	3
GO:0034067	protein localization to Golgi apparatus	3/1007	20/16374	0.121384	0.564984	0.509145	IFT20/GAK/PAQR3	3
GO:0039529	RIG-I signaling pathway	3/1007	20/16374	0.121384	0.564984	0.509145	PUM2/PUM1/NPLOC4	3
GO:0044319	wound healing, spreading of cells	3/1007	20/16374	0.121384	0.564984	0.509145	CD44/FLNA/PDPN	3
GO:0045332	phospholipid translocation	3/1007	20/16374	0.121384	0.564984	0.509145	ABCC1/ABCA1/ATP11A	3
GO:0048846	axon extension involved in axon guidance	3/1007	20/16374	0.121384	0.564984	0.509145	DSCAM/NRP2/SLIT2	3
GO:0050999	regulation of nitric-oxide synthase activity	3/1007	20/16374	0.121384	0.564984	0.509145	EGFR/HSP90AA1/ACVR2A	3
GO:0070584	mitochondrion morphogenesis	3/1007	20/16374	0.121384	0.564984	0.509145	SSBP1/PNPT1/OPA1	3
GO:0071425	hematopoietic stem cell proliferation	3/1007	20/16374	0.121384	0.564984	0.509145	RUNX1/ARIH2/KITLG	3
GO:1901673	regulation of mitotic spindle assembly	3/1007	20/16374	0.121384	0.564984	0.509145	HNRNPU/TPR/HSPA1A	3
GO:0018210	peptidyl-threonine modification	5/1007	43/16374	0.12233	0.564984	0.509145	CHI3L1/WNK3/RPTOR/CEMIP/SPRED1	5
GO:0051145	smooth muscle cell differentiation	5/1007	43/16374	0.12233	0.564984	0.509145	ACVR1/MKL1/MED28/NFATC3/CTNNB1	5
GO:0000460	maturation of 5.8S rRNA	2/1007	10/16374	0.12251	0.564984	0.509145	MTREX/RCL1	2
GO:0002091	negative regulation of receptor internalization	2/1007	10/16374	0.12251	0.564984	0.509145	MTMR2/SDCBP	2
GO:0003149	membranous septum morphogenesis	2/1007	10/16374	0.12251	0.564984	0.509145	TGFBR2/TGFB2	2
GO:0003183	mitral valve morphogenesis	2/1007	10/16374	0.12251	0.564984	0.509145	ACVR1/SOX4	2
GO:0007084	mitotic nuclear envelope reassembly	2/1007	10/16374	0.12251	0.564984	0.509145	VRK1/PPP2R2A	2
GO:0007220	Notch receptor processing	2/1007	10/16374	0.12251	0.564984	0.509145	ADAM17/PSEN1	2
GO:0010225	response to UV-C	2/1007	10/16374	0.12251	0.564984	0.509145	WRN/MAP3K4	2
GO:0010587	miRNA catabolic process	2/1007	10/16374	0.12251	0.564984	0.509145	TENT2/PNPT1	2
GO:0010998	regulation of translational initiation by eIF2 alpha phosphorylation	2/1007	10/16374	0.12251	0.564984	0.509145	NPM1/EIF2AK3	2
GO:0018242	protein O-linked glycosylation via serine	2/1007	10/16374	0.12251	0.564984	0.509145	GALNT13/GALNT2	2
GO:0032206	positive regulation of telomere maintenance	2/1007	10/16374	0.12251	0.564984	0.509145	DHX36/GNL3	2
GO:0032488	Cdc42 protein signal transduction	2/1007	10/16374	0.12251	0.564984	0.509145	NTN1/ABCA1	2
GO:0045637	regulation of myeloid cell differentiation	2/1007	10/16374	0.12251	0.564984	0.509145	CBFB/RUNX1	2
GO:0045741	positive regulation of epidermal growth factor-activated receptor activity	2/1007	10/16374	0.12251	0.564984	0.509145	ADAM17/FBXW7	2
GO:0045945	positive regulation of transcription by RNA polymerase III	2/1007	10/16374	0.12251	0.564984	0.509145	ICE1/RPTOR	2
GO:0046660	female sex differentiation	2/1007	10/16374	0.12251	0.564984	0.509145	LHFPL2/CHD7	2
GO:0048660	regulation of smooth muscle cell proliferation	2/1007	10/16374	0.12251	0.564984	0.509145	PRKDC/CTNNB1	2
GO:0051279	regulation of release of sequestered calcium ion into cytosol	2/1007	10/16374	0.12251	0.564984	0.509145	ATG5/PRKCE	2
GO:0060338	regulation of type I interferon-mediated signaling pathway	2/1007	10/16374	0.12251	0.564984	0.509145	ABCE1/HSP90AB1	2
GO:0060439	trachea morphogenesis	2/1007	10/16374	0.12251	0.564984	0.509145	TGFBR2/CTNNB1	2
GO:0061635	regulation of protein complex stability	2/1007	10/16374	0.12251	0.564984	0.509145	TRAPPC11/HSPA8	2
GO:0071103	DNA conformation change	2/1007	10/16374	0.12251	0.564984	0.509145	RBBP4/TP53	2
GO:0071243	cellular response to arsenic-containing substance	2/1007	10/16374	0.12251	0.564984	0.509145	HMOX1/MKNK2	2
GO:0071481	cellular response to X-ray	2/1007	10/16374	0.12251	0.564984	0.509145	HMGA2/NUCKS1	2
GO:0080171	lytic vacuole organization	2/1007	10/16374	0.12251	0.564984	0.509145	ARF1/TMEM165	2
GO:1901799	negative regulation of proteasomal protein catabolic process	2/1007	10/16374	0.12251	0.564984	0.509145	MARCH7/HSP90AB1	2
GO:1903265	positive regulation of tumor necrosis factor-mediated signaling pathway	2/1007	10/16374	0.12251	0.564984	0.509145	ADAM17/HSPA1A	2
GO:2000273	positive regulation of signaling receptor activity	2/1007	10/16374	0.12251	0.564984	0.509145	ITGB1/PRKCE	2
GO:2000304	positive regulation of ceramide biosynthetic process	2/1007	10/16374	0.12251	0.564984	0.509145	NSMAF/RACK1	2
GO:0019079	viral genome replication	8/1007	81/16374	0.124195	0.571438	0.51496	DDX5/PABPC1/RAD23A/ADAR/PPID/VCP/PPIA/IFI16	8
GO:0048041	focal adhesion assembly	8/1007	81/16374	0.124195	0.571438	0.51496	S100A10/CTTN/ROCK2/PEAK1/DAPK3/CORO1C/ARHGEF7/LIMS1	8
GO:0060322	head development	18/1007	218/16374	0.124716	0.572692	0.516091	SHROOM4/PRKDC/CTTNBP2/TGFBR2/CHD7/RAF1/ATP2B1/WRN/GRIN2B/DSCAML1/UBE3A/TBC1D23/BAG3/PCDH19/RAB18/SPATA5/ACSL3/CNTNAP2	18
GO:0010001	glial cell differentiation	11/1007	121/16374	0.125085	0.572692	0.516091	GAP43/SERPINE2/CDK6/SOX4/DLL1/VIM/EIF2B1/CTNNB1/EIF2B3/ZNF365/TENM4	11
GO:0032543	mitochondrial translation	11/1007	121/16374	0.125085	0.572692	0.516091	MRPL18/LRPPRC/MRPL50/MRPL3/TRMT10C/PTCD3/MRPL21/DAP3/MRPL33/UQCC1/FASTKD2	11
GO:0048667	cell morphogenesis involved in neuron differentiation	10/1007	108/16374	0.127575	0.572692	0.516091	TRAK2/NRCAM/S100A6/HPRT1/MEF2A/ITGB1/DSCAM/DSCAML1/PITPNA/PAK3	10
GO:0030218	erythrocyte differentiation	9/1007	95/16374	0.129539	0.572692	0.516091	CDK6/HSPA9/ADAR/RPS6/SMAD5/RPS14/RPS19/HSPA1A/ACVR2A	9
GO:0043534	blood vessel endothelial cell migration	9/1007	95/16374	0.129539	0.572692	0.516091	HMOX1/ANGPT2/ADAM17/TMSB4X/ANXA1/AMOTL1/FBXW7/HSPB1/SPRED1	9
GO:1990778	protein localization to cell periphery	9/1007	95/16374	0.129539	0.572692	0.516091	EGFR/RER1/ITGB1/ITGA3/STAC/WNK3/PRKCE/PPFIA1/EPHB2	9
GO:0030308	negative regulation of cell growth	11/1007	122/16374	0.130327	0.572692	0.516091	CRYAB/SERPINE2/GNG4/CDKN1A/RACK1/TP53/SMARCA4/DCBLD2/SLIT2/HSPA1A/TGFB2	11
GO:0006402	mRNA catabolic process	4/1007	32/16374	0.130996	0.572692	0.516091	METTL16/PNPT1/PRR5L/HSPA1A	4
GO:0007029	endoplasmic reticulum organization	4/1007	32/16374	0.130996	0.572692	0.516091	TMEM38B/GAK/EIF2AK3/STX18	4
GO:0071276	cellular response to cadmium ion	4/1007	32/16374	0.130996	0.572692	0.516091	EGFR/HMOX1/HSF1/UBE2D3	4
GO:0048701	embryonic cranial skeleton morphogenesis	5/1007	44/16374	0.13146	0.572692	0.516091	CHST11/MMP16/TGFBR2/PRRX1/MTHFD1L	5
GO:0006309	apoptotic DNA fragmentation	3/1007	21/16374	0.135481	0.572692	0.516091	KPNB1/HSF1/KPNA1	3
GO:0007041	lysosomal transport	3/1007	21/16374	0.135481	0.572692	0.516091	VPS53/ARF1/HSPA1A	3
GO:0008361	regulation of cell size	3/1007	21/16374	0.135481	0.572692	0.516091	LARS/RPTOR/RDX	3
GO:0021516	dorsal spinal cord development	3/1007	21/16374	0.135481	0.572692	0.516091	DRAXIN/PBX3/LMO4	3
GO:0035024	negative regulation of Rho protein signal transduction	3/1007	21/16374	0.135481	0.572692	0.516091	ITGB1/ITGA3/ABL2	3
GO:0035710	CD4-positive, alpha-beta T cell activation	3/1007	21/16374	0.135481	0.572692	0.516091	CBFB/SH3RF1/RUNX1	3
GO:0048255	mRNA stabilization	3/1007	21/16374	0.135481	0.572692	0.516091	HNRNPU/PABPC1/TENT4A	3
GO:0048485	sympathetic nervous system development	3/1007	21/16374	0.135481	0.572692	0.516091	SOX4/CTNNB1/NRP2	3
GO:0050771	negative regulation of axonogenesis	3/1007	21/16374	0.135481	0.572692	0.516091	TRAK2/PSEN1/EPHB2	3
GO:0050772	positive regulation of axonogenesis	3/1007	21/16374	0.135481	0.572692	0.516091	TIAM1/SLIT2/ROBO1	3
GO:0050807	regulation of synapse organization	3/1007	21/16374	0.135481	0.572692	0.516091	PTPRO/VCP/ETV5	3
GO:0120192	tight junction assembly	3/1007	21/16374	0.135481	0.572692	0.516091	CBFB/ROCK2/RUNX1	3
GO:0030433	ubiquitin-dependent ERAD pathway	6/1007	57/16374	0.136359	0.572692	0.516091	UBQLN1/FAF2/VCP/NPLOC4/ECPAS/USP14	6
GO:0048661	positive regulation of smooth muscle cell proliferation	6/1007	57/16374	0.136359	0.572692	0.516091	EGFR/HMOX1/MNAT1/TGFBR2/NAMPT/IL6R	6
GO:0071773	cellular response to BMP stimulus	8/1007	83/16374	0.137339	0.572692	0.516091	ACVR1/EGR1/DDX5/UBE2D3/SMAD5/USP15/USP9X/ACVR2A	8
GO:0048194	Golgi vesicle budding	7/1007	70/16374	0.137835	0.572692	0.516091	SEC31A/PPP6R3/SEC23IP/TRAPPC10/SCFD1/CNIH3/ANKRD28	7
GO:0010256	endomembrane system organization	13/1007	151/16374	0.138118	0.572692	0.516091	SERPINE2/TMEM38B/SEC23IP/TRAPPC11/NPLOC4/MTSS1/BLZF1/ARHGEF7/GAK/ARHGAP21/EIF2AK3/HIKESHI/SERP1	13
GO:0198738	cell-cell signaling by wnt	15/1007	179/16374	0.138372	0.572692	0.516091	DRAXIN/MCC/CCNY/AMOTL1/SKP1/UBB/TNKS/CSNK2A1/CTNNB1/FBXW11/CYLD/OTULIN/RPS27A/SNX3/UBC	15
GO:0030029	actin filament-based process	10/1007	110/16374	0.138996	0.572692	0.516091	SHROOM4/DIXDC1/ARF1/TMSB4X/BIN3/ARHGEF2/ROCK2/CRK/TMSB10/FHOD3	10
GO:0072657	protein localization to membrane	10/1007	110/16374	0.138996	0.572692	0.516091	EGFR/RER1/TIAM1/ITGB1/ITGA3/STAC/WNK3/PRKCE/PPFIA1/EPHB2	10
GO:0043403	skeletal muscle tissue regeneration	4/1007	33/16374	0.142256	0.572692	0.516091	TGFBR2/BIN3/EZH2/LARGE1	4
GO:0048844	artery morphogenesis	4/1007	33/16374	0.142256	0.572692	0.516091	SOX4/PRRX1/LDLR/TGFB2	4
GO:0090503	RNA phosphodiester bond hydrolysis, exonucleolytic	4/1007	33/16374	0.142256	0.572692	0.516091	XRN2/PNPT1/DIS3/CNOT2	4
GO:1905314	semi-lunar valve development	4/1007	33/16374	0.142256	0.572692	0.516091	ROCK2/SLIT2/ROBO1/TGFB2	4
GO:0000244	spliceosomal tri-snRNP complex assembly	2/1007	11/16374	0.143873	0.572692	0.516091	PRPF6/PRPF8	2
GO:0001780	neutrophil homeostasis	2/1007	11/16374	0.143873	0.572692	0.516091	JAM3/ANXA1	2
GO:0006900	vesicle budding from membrane	2/1007	11/16374	0.143873	0.572692	0.516091	S100A10/ANXA2	2
GO:0006983	ER overload response	2/1007	11/16374	0.143873	0.572692	0.516091	TP53/EIF2AK3	2
GO:0010762	regulation of fibroblast migration	2/1007	11/16374	0.143873	0.572692	0.516091	CORO1C/PRR5L	2
GO:0021696	cerebellar cortex morphogenesis	2/1007	11/16374	0.143873	0.572692	0.516091	SERPINE2/ZNF365	2
GO:0033169	histone H3-K9 demethylation	2/1007	11/16374	0.143873	0.572692	0.516091	KDM7A/KDM1A	2
GO:0034379	very-low-density lipoprotein particle assembly	2/1007	11/16374	0.143873	0.572692	0.516091	ARF1/ACSL3	2
GO:0035455	response to interferon-alpha	2/1007	11/16374	0.143873	0.572692	0.516091	ADAR/KLHL20	2
GO:0043374	CD8-positive, alpha-beta T cell differentiation	2/1007	11/16374	0.143873	0.572692	0.516091	CBFB/RUNX1	2
GO:0045667	regulation of osteoblast differentiation	2/1007	11/16374	0.143873	0.572692	0.516091	DDX5/SMOC1	2
GO:0048172	regulation of short-term neuronal synaptic plasticity	2/1007	11/16374	0.143873	0.572692	0.516091	GRIK2/SHISA9	2
GO:0048512	circadian behavior	2/1007	11/16374	0.143873	0.572692	0.516091	TP53/ZFHX3	2
GO:0055015	ventricular cardiac muscle cell development	2/1007	11/16374	0.143873	0.572692	0.516091	MEF2A/ATG5	2
GO:0060394	negative regulation of pathway-restricted SMAD protein phosphorylation	2/1007	11/16374	0.143873	0.572692	0.516091	STRAP/SNX25	2
GO:0070213	protein auto-ADP-ribosylation	2/1007	11/16374	0.143873	0.572692	0.516091	PARP12/TNKS	2
GO:0071372	cellular response to follicle-stimulating hormone stimulus	2/1007	11/16374	0.143873	0.572692	0.516091	GCLM/POR	2
GO:0097205	renal filtration	2/1007	11/16374	0.143873	0.572692	0.516091	ITGA3/PTPRO	2
GO:1901222	regulation of NIK/NF-kappaB signaling	2/1007	11/16374	0.143873	0.572692	0.516091	TMSB4X/NFKBIA	2
GO:1990440	positive regulation of transcription from RNA polymerase II promoter in response to endoplasmic reticulum stress	2/1007	11/16374	0.143873	0.572692	0.516091	TP53/ATF4	2
GO:2001171	positive regulation of ATP biosynthetic process	2/1007	11/16374	0.143873	0.572692	0.516091	TMSB4X/VCP	2
GO:0031532	actin cytoskeleton reorganization	8/1007	84/16374	0.144164	0.572692	0.516091	CTTN/ANXA1/ABL2/ATP2C1/DAPK3/FLNA/ANTXR1/FARP2	8
GO:0035249	synaptic transmission, glutamatergic	6/1007	58/16374	0.144708	0.572692	0.516091	GRIK2/EGFR/SERPINE2/TSHZ3/CNIH3/PSEN1	6
GO:0070059	intrinsic apoptotic signaling pathway in response to endoplasmic reticulum stress	6/1007	58/16374	0.144708	0.572692	0.516091	TP53/ATF4/TNFRSF10B/OPA1/EIF2AK3/HSPA1A	6
GO:0070527	platelet aggregation	6/1007	58/16374	0.144708	0.572692	0.516091	SERPINE2/FLNA/ACTG1/PDPN/UBASH3B/HSPB1	6
GO:0042552	myelination	9/1007	98/16374	0.148309	0.572692	0.516091	JAM3/SERINC5/NFASC/MTMR2/FAM126A/CTNNB1/EIF2AK3/SCN8A/TENM4	9
GO:0009235	cobalamin metabolic process	3/1007	22/16374	0.150106	0.572692	0.516091	ABCC1/MTR/MUT	3
GO:0010596	negative regulation of endothelial cell migration	3/1007	22/16374	0.150106	0.572692	0.516091	ADAMTS9/DNAJA4/SLIT2	3
GO:0010613	positive regulation of cardiac muscle hypertrophy	3/1007	22/16374	0.150106	0.572692	0.516091	CAMK2D/MEF2A/ROCK2	3
GO:0046545	development of primary female sexual characteristics	3/1007	22/16374	0.150106	0.572692	0.516091	LHFPL2/NUP107/UBB	3
GO:0060999	positive regulation of dendritic spine development	3/1007	22/16374	0.150106	0.572692	0.516091	ARF1/DLG5/PSEN1	3
GO:0061912	selective autophagy	3/1007	22/16374	0.150106	0.572692	0.516091	TP53/SPTLC1/BAG3	3
GO:1901223	negative regulation of NIK/NF-kappaB signaling	3/1007	22/16374	0.150106	0.572692	0.516091	TMSB4X/FBXW11/CYLD	3
GO:0031648	protein destabilization	5/1007	46/16374	0.1506	0.572692	0.516091	PRKDC/MDM2/RAD23A/FBXW7/FBXW11	5
GO:0034260	negative regulation of GTPase activity	5/1007	46/16374	0.1506	0.572692	0.516091	IPO5/RDX/LRCH1/SLIT2/DGKI	5
GO:0048538	thymus development	5/1007	46/16374	0.1506	0.572692	0.516091	PRKDC/RAF1/CTNNB1/LMO4/PSEN1	5
GO:0090630	activation of GTPase activity	5/1007	46/16374	0.1506	0.572692	0.516091	TIAM1/RAPGEF1/CRK/CORO1C/EIF5	5
GO:0002262	myeloid cell homeostasis	6/1007	59/16374	0.153285	0.572692	0.516091	ANXA1/HSPA9/ADAR/SMAD5/RPS14/RPS19	6
GO:0030032	lamellipodium assembly	6/1007	59/16374	0.153285	0.572692	0.516091	ITGB1/BIN3/PTPRO/ARHGEF7/ARPC2/SLIT2	6
GO:0006284	base-excision repair	4/1007	34/16374	0.153881	0.572692	0.516091	HMGA2/TP53/WRN/RPS3	4
GO:0010573	vascular endothelial growth factor production	4/1007	34/16374	0.153881	0.572692	0.516091	SULF2/ATF4/SARS/EIF2AK3	4
GO:0019432	triglyceride biosynthetic process	4/1007	34/16374	0.153881	0.572692	0.516091	FBXW7/ACSL4/LDLR/LPIN1	4
GO:0043276	anoikis	4/1007	34/16374	0.153881	0.572692	0.516091	ITGB1/PTRH2/MAP3K7/MCL1	4
GO:0043507	positive regulation of JUN kinase activity	4/1007	34/16374	0.153881	0.572692	0.516091	TIAM1/MAP3K7/RPS3/MAP3K4	4
GO:0071392	cellular response to estradiol stimulus	4/1007	34/16374	0.153881	0.572692	0.516091	EGFR/HSF1/DDX18/NRIP1	4
GO:1902042	negative regulation of extrinsic apoptotic signaling pathway via death domain receptors	4/1007	34/16374	0.153881	0.572692	0.516091	HMOX1/ARHGEF2/RAF1/TNFRSF10B	4
GO:0030509	BMP signaling pathway	11/1007	127/16374	0.15828	0.572692	0.516091	ACVR1/EGR1/DDX5/ITGA3/UBE2D3/SMAD5/USP15/CTDSPL2/USP9X/TRIM33/ACVR2A	11
GO:0007160	cell-matrix adhesion	13/1007	155/16374	0.158547	0.572692	0.516091	CD44/CDK6/TIAM1/ITGB1/SNED1/CTTN/ITGA3/JAM3/PEAK1/CTNNB1/ARHGEF7/ADAM9/PPFIA1	13
GO:1901566	organonitrogen compound biosynthetic process	13/1007	155/16374	0.158547	0.572692	0.516091	BACE2/PMM2/MAN2A1/GALNT17/ABCA1/CAPN2/PAWR/ACSL3/PSEN1/EXT1/ST8SIA4/LARGE1/UGCG	13
GO:0009792	embryo development ending in birth or egg hatching	12/1007	141/16374	0.158701	0.572692	0.516091	ACVR1/SULF2/PRKDC/HSF1/DLL1/AMBRA1/TP53/ACSL4/CTNNB1/PSEN1/ACVR2A/TGFB2	12
GO:0016050	vesicle organization	5/1007	47/16374	0.160584	0.572692	0.516091	ANXA2/ANXA1/RAB39A/STAM/SDCBP	5
GO:0120163	negative regulation of cold-induced thermogenesis	5/1007	47/16374	0.160584	0.572692	0.516091	ADAM17/NOVA1/ATF4/NRDC/PLCL1	5
GO:1904888	cranial skeletal system development	5/1007	47/16374	0.160584	0.572692	0.516091	MMP16/TGFBR2/PRRX1/CTNNB1/TGFB2	5
GO:0007015	actin filament organization	7/1007	73/16374	0.16092	0.572692	0.516091	SHROOM4/ARF1/TMSB4X/BIN3/ARHGEF2/TMSB10/FHOD3	7
GO:0043085	positive regulation of catalytic activity	7/1007	73/16374	0.16092	0.572692	0.516091	NSMAF/ARF1/MMP16/UBA2/PRKCE/YWHAB/PSEN1	7
GO:0008543	fibroblast growth factor receptor signaling pathway	9/1007	100/16374	0.161535	0.572692	0.516091	SULF2/HNRNPM/POLR2F/POLR2B/CTNNB1/POLR2A/HNRNPF/GTF2F2/SPRED1	9
GO:0001944	vasculature development	6/1007	60/16374	0.16208	0.572692	0.516091	MDM2/TGFBR2/RAPGEF1/FBXW7/ANTXR1/PSEN1	6
GO:0014070	response to organic cyclic compound	6/1007	60/16374	0.16208	0.572692	0.516091	ANGPT2/NAMPT/ANXA7/PLIN2/TAF2/ACSL3	6
GO:0006996	organelle organization	24/1007	315/16374	0.163442	0.572692	0.516091	HNRNPU/ANXA2/BUD23/HMGA2/SS18L1/PFDN2/YME1L1/RAB39A/TIMM23/SMARCA4/DNAJC2/DAPK3/CHD2/NUCKS1/TIMM44/TOMM7/CAPN2/SAFB/RDX/EZH2/STX18/AEBP2/PEX3/ATP6V1A	24
GO:0022607	cellular component assembly	19/1007	242/16374	0.163831	0.572692	0.516091	IL1RAP/NAP1L4/RAPGEF1/ICE1/RAF1/HSP90AA1/VCP/NPM1/WARS/FLNA/RPS3/PCDH17/ANTXR1/LMO4/RDX/STX18/EPHB2/FNIP2/HSPA8	19
GO:0000083	regulation of transcription involved in G1/S transition of mitotic cell cycle	3/1007	23/16374	0.165206	0.572692	0.516091	BACH1/POLA1/TFDP2	3
GO:0006904	vesicle docking involved in exocytosis	3/1007	23/16374	0.165206	0.572692	0.516091	SCFD2/SYTL2/SCFD1	3
GO:0006929	substrate-dependent cell migration	3/1007	23/16374	0.165206	0.572692	0.516091	CTTN/NTN1/SDCBP	3
GO:0009966	regulation of signal transduction	3/1007	23/16374	0.165206	0.572692	0.516091	CRK/UGCG/GPC6	3
GO:0039528	cytoplasmic pattern recognition receptor signaling pathway in response to virus	3/1007	23/16374	0.165206	0.572692	0.516091	PUM2/PUM1/NPLOC4	3
GO:0051674	localization of cell	3/1007	23/16374	0.165206	0.572692	0.516091	ADAM17/CTTN/ELMO1	3
GO:0060249	anatomical structure homeostasis	3/1007	23/16374	0.165206	0.572692	0.516091	DHX36/SMG6/GNL3	3
GO:0000079	regulation of cyclin-dependent protein serine/threonine kinase activity	4/1007	35/16374	0.165848	0.572692	0.516091	BCCIP/GTPBP4/CDKN1A/CCNT1	4
GO:0000413	protein peptidyl-prolyl isomerization	4/1007	35/16374	0.165848	0.572692	0.516091	RANBP2/PPID/PPIA/PPIG	4
GO:0006401	RNA catabolic process	4/1007	35/16374	0.165848	0.572692	0.516091	LRPPRC/XRN2/PNPT1/PRR5L	4
GO:0007520	myoblast fusion	4/1007	35/16374	0.165848	0.572692	0.516091	MYOF/KCNH1/ADAM12/CAPN2	4
GO:0045214	sarcomere organization	4/1007	35/16374	0.165848	0.572692	0.516091	ITGB1/TPM1/ACTG1/FHOD3	4
GO:0051017	actin filament bundle assembly	4/1007	35/16374	0.165848	0.572692	0.516091	ACTN4/FLNA/RDX/PAWR	4
GO:0000423	mitophagy	2/1007	12/16374	0.165929	0.572692	0.516091	AMBRA1/TP53	2
GO:0002690	positive regulation of leukocyte chemotaxis	2/1007	12/16374	0.165929	0.572692	0.516091	ADAM17/IL6R	2
GO:0006390	mitochondrial transcription	2/1007	12/16374	0.165929	0.572692	0.516091	SLC25A33/MTERF1	2
GO:0007077	mitotic nuclear envelope disassembly	2/1007	12/16374	0.165929	0.572692	0.516091	VRK1/LPIN1	2
GO:0007175	negative regulation of epidermal growth factor-activated receptor activity	2/1007	12/16374	0.165929	0.572692	0.516091	PSEN1/ZFYVE28	2
GO:0007320	insemination	2/1007	12/16374	0.165929	0.572692	0.516091	SERPINE2/ACVR2A	2
GO:0008334	histone mRNA metabolic process	2/1007	12/16374	0.165929	0.572692	0.516091	SNRPD3/SLBP	2
GO:0010002	cardioblast differentiation	2/1007	12/16374	0.165929	0.572692	0.516091	DHX36/TGFB2	2
GO:0030157	pancreatic juice secretion	2/1007	12/16374	0.165929	0.572692	0.516091	WNK3/COPA	2
GO:0030208	dermatan sulfate biosynthetic process	2/1007	12/16374	0.165929	0.572692	0.516091	UST/DSEL	2
GO:0035791	platelet-derived growth factor receptor-beta signaling pathway	2/1007	12/16374	0.165929	0.572692	0.516091	HIP1/PTPN12	2
GO:0036037	CD8-positive, alpha-beta T cell activation	2/1007	12/16374	0.165929	0.572692	0.516091	CBFB/RUNX1	2
GO:0042158	lipoprotein biosynthetic process	2/1007	12/16374	0.165929	0.572692	0.516091	ABCA1/UGCG	2
GO:0043954	cellular component maintenance	2/1007	12/16374	0.165929	0.572692	0.516091	GRIN2B/ZNF804A	2
GO:0046475	glycerophospholipid catabolic process	2/1007	12/16374	0.165929	0.572692	0.516091	LDLR/PRDX6	2
GO:0046834	lipid phosphorylation	2/1007	12/16374	0.165929	0.572692	0.516091	DGKD/DGKI	2
GO:0050755	chemokine metabolic process	2/1007	12/16374	0.165929	0.572692	0.516091	HMOX1/EGR1	2
GO:0051549	positive regulation of keratinocyte migration	2/1007	12/16374	0.165929	0.572692	0.516091	EPB41L4B/ADAM9	2
GO:0061014	positive regulation of mRNA catabolic process	2/1007	12/16374	0.165929	0.572692	0.516091	PNPT1/PRR5L	2
GO:0071340	skeletal muscle acetylcholine-gated channel clustering	2/1007	12/16374	0.165929	0.572692	0.516091	RER1/ETV5	2
GO:0090331	negative regulation of platelet aggregation	2/1007	12/16374	0.165929	0.572692	0.516091	SERPINE2/UBASH3B	2
GO:0098885	modification of postsynaptic actin cytoskeleton	2/1007	12/16374	0.165929	0.572692	0.516091	CTTNBP2/TIAM1	2
GO:0106074	aminoacyl-tRNA metabolism involved in translational fidelity	2/1007	12/16374	0.165929	0.572692	0.516091	IARS/LARS	2
GO:2000036	regulation of stem cell population maintenance	2/1007	12/16374	0.165929	0.572692	0.516091	HMGA2/CNOT2	2
GO:2000146	negative regulation of cell motility	2/1007	12/16374	0.165929	0.572692	0.516091	CRK/FRMD5	2
GO:2000772	regulation of cellular senescence	2/1007	12/16374	0.165929	0.572692	0.516091	TP53/PNPT1	2
GO:2000774	positive regulation of cellular senescence	2/1007	12/16374	0.165929	0.572692	0.516091	HMGA2/PAWR	2
GO:0002479	antigen processing and presentation of exogenous peptide antigen via MHC class I, TAP-dependent	7/1007	74/16374	0.16898	0.572692	0.516091	PSME4/PSMD1/PSMD12/PSMA7/PSMB7/PSMD14/PSMD5	7
GO:0019827	stem cell population maintenance	7/1007	74/16374	0.16898	0.572692	0.516091	HMGA2/MED28/GNL3/CTNNB1/MED10/RIF1/CNOT2	7
GO:0035725	sodium ion transmembrane transport	7/1007	74/16374	0.16898	0.572692	0.516091	CAMK2D/ARF1/SLC20A2/ATP1B3/SLC24A3/HCN1/SLC24A2	7
GO:0003231	cardiac ventricle development	5/1007	48/16374	0.170827	0.572692	0.516091	HECTD1/MDM2/DCTN5/MDM4/LMO4	5
GO:0051298	centrosome duplication	5/1007	48/16374	0.170827	0.572692	0.516091	CHORDC1/ROCK2/XPO1/NPM1/CEP192	5
GO:0000447	endonucleolytic cleavage in ITS1 to separate SSU-rRNA from 5.8S rRNA and LSU-rRNA from tricistronic rRNA transcript (SSU-rRNA, 5.8S rRNA, LSU-rRNA)	1/1007	3/16374	0.173396	0.572692	0.516091	RCL1	1
GO:0000738	DNA catabolic process, exonucleolytic	1/1007	3/16374	0.173396	0.572692	0.516091	XRN2	1
GO:0000958	mitochondrial mRNA catabolic process	1/1007	3/16374	0.173396	0.572692	0.516091	PNPT1	1
GO:0001172	transcription, RNA-templated	1/1007	3/16374	0.173396	0.572692	0.516091	POLR2A	1
GO:0001546	preantral ovarian follicle growth	1/1007	3/16374	0.173396	0.572692	0.516091	ZNF830	1
GO:0001887	selenium compound metabolic process	1/1007	3/16374	0.173396	0.572692	0.516091	TXNRD1	1
GO:0002378	immunoglobulin biosynthetic process	1/1007	3/16374	0.173396	0.572692	0.516091	GALNT2	1
GO:0002424	T cell mediated immune response to tumor cell	1/1007	3/16374	0.173396	0.572692	0.516091	HSPD1	1
GO:0002685	regulation of leukocyte migration	1/1007	3/16374	0.173396	0.572692	0.516091	ANXA1	1
GO:0003056	regulation of vascular smooth muscle contraction	1/1007	3/16374	0.173396	0.572692	0.516091	ATP2B1	1
GO:0003275	apoptotic process involved in outflow tract morphogenesis	1/1007	3/16374	0.173396	0.572692	0.516091	TGFB2	1
GO:0003340	negative regulation of mesenchymal to epithelial transition involved in metanephros morphogenesis	1/1007	3/16374	0.173396	0.572692	0.516091	CTNNB1	1
GO:0006167	AMP biosynthetic process	1/1007	3/16374	0.173396	0.572692	0.516091	ADSS	1
GO:0006210	thymine catabolic process	1/1007	3/16374	0.173396	0.572692	0.516091	DPYD	1
GO:0006432	phenylalanyl-tRNA aminoacylation	1/1007	3/16374	0.173396	0.572692	0.516091	FARSB	1
GO:0006458	'de novo' protein folding	1/1007	3/16374	0.173396	0.572692	0.516091	HSPD1	1
GO:0006546	glycine catabolic process	1/1007	3/16374	0.173396	0.572692	0.516091	GLDC	1
GO:0006642	triglyceride mobilization	1/1007	3/16374	0.173396	0.572692	0.516091	LPIN1	1
GO:0006679	glucosylceramide biosynthetic process	1/1007	3/16374	0.173396	0.572692	0.516091	UGCG	1
GO:0007161	calcium-independent cell-matrix adhesion	1/1007	3/16374	0.173396	0.572692	0.516091	ITGB1	1
GO:0007386	compartment pattern specification	1/1007	3/16374	0.173396	0.572692	0.516091	DLL1	1
GO:0009165	nucleotide biosynthetic process	1/1007	3/16374	0.173396	0.572692	0.516091	DGUOK	1
GO:0009757	hexose mediated signaling	1/1007	3/16374	0.173396	0.572692	0.516091	SMARCA4	1
GO:0010526	negative regulation of transposition, RNA-mediated	1/1007	3/16374	0.173396	0.572692	0.516091	TUT7	1
GO:0010593	negative regulation of lamellipodium assembly	1/1007	3/16374	0.173396	0.572692	0.516091	SLIT2	1
GO:0010636	positive regulation of mitochondrial fusion	1/1007	3/16374	0.173396	0.572692	0.516091	OPA1	1
GO:0010664	negative regulation of striated muscle cell apoptotic process	1/1007	3/16374	0.173396	0.572692	0.516091	BAG3	1
GO:0010693	negative regulation of alkaline phosphatase activity	1/1007	3/16374	0.173396	0.572692	0.516091	TGFB2	1
GO:0010766	negative regulation of sodium ion transport	1/1007	3/16374	0.173396	0.572692	0.516091	SERPINE2	1
GO:0010909	positive regulation of heparan sulfate proteoglycan biosynthetic process	1/1007	3/16374	0.173396	0.572692	0.516091	CTNNB1	1
GO:0014839	myoblast migration involved in skeletal muscle regeneration	1/1007	3/16374	0.173396	0.572692	0.516091	BIN3	1
GO:0014916	regulation of lung blood pressure	1/1007	3/16374	0.173396	0.572692	0.516091	NAMPT	1
GO:0015742	alpha-ketoglutarate transport	1/1007	3/16374	0.173396	0.572692	0.516091	SLC25A21	1
GO:0015853	adenine transport	1/1007	3/16374	0.173396	0.572692	0.516091	VDAC3	1
GO:0016189	synaptic vesicle to endosome fusion	1/1007	3/16374	0.173396	0.572692	0.516091	EEA1	1
GO:0016259	selenocysteine metabolic process	1/1007	3/16374	0.173396	0.572692	0.516091	SARS	1
GO:0016553	base conversion or substitution editing	1/1007	3/16374	0.173396	0.572692	0.516091	ADAR	1
GO:0016557	peroxisome membrane biogenesis	1/1007	3/16374	0.173396	0.572692	0.516091	PEX3	1
GO:0017187	peptidyl-glutamic acid carboxylation	1/1007	3/16374	0.173396	0.572692	0.516091	VKORC1L1	1
GO:0019348	dolichol metabolic process	1/1007	3/16374	0.173396	0.572692	0.516091	DPM1	1
GO:0019673	GDP-mannose metabolic process	1/1007	3/16374	0.173396	0.572692	0.516091	GUK1	1
GO:0021553	olfactory nerve development	1/1007	3/16374	0.173396	0.572692	0.516091	CHD7	1
GO:0021564	vagus nerve development	1/1007	3/16374	0.173396	0.572692	0.516091	NAV2	1
GO:0021783	preganglionic parasympathetic fiber development	1/1007	3/16374	0.173396	0.572692	0.516091	NAV2	1
GO:0021828	gonadotrophin-releasing hormone neuronal migration to the hypothalamus	1/1007	3/16374	0.173396	0.572692	0.516091	NRP2	1
GO:0021869	forebrain ventricular zone progenitor cell division	1/1007	3/16374	0.173396	0.572692	0.516091	DIXDC1	1
GO:0022616	DNA strand elongation	1/1007	3/16374	0.173396	0.572692	0.516091	NUCKS1	1
GO:0030150	protein import into mitochondrial matrix	1/1007	3/16374	0.173396	0.572692	0.516091	TOMM7	1
GO:0030947	regulation of vascular endothelial growth factor receptor signaling pathway	1/1007	3/16374	0.173396	0.572692	0.516091	MYOF	1
GO:0031440	regulation of mRNA 3'-end processing	1/1007	3/16374	0.173396	0.572692	0.516091	PAPOLA	1
GO:0031644	regulation of nervous system process	1/1007	3/16374	0.173396	0.572692	0.516091	ROCK2	1
GO:0032273	positive regulation of protein polymerization	1/1007	3/16374	0.173396	0.572692	0.516091	HSP90AA1	1
GO:0032289	central nervous system myelin formation	1/1007	3/16374	0.173396	0.572692	0.516091	TENM4	1
GO:0032601	connective tissue growth factor production	1/1007	3/16374	0.173396	0.572692	0.516091	ROCK2	1
GO:0033128	negative regulation of histone phosphorylation	1/1007	3/16374	0.173396	0.572692	0.516091	UBE2B	1
GO:0033623	regulation of integrin activation	1/1007	3/16374	0.173396	0.572692	0.516091	FARP2	1
GO:0034111	negative regulation of homotypic cell-cell adhesion	1/1007	3/16374	0.173396	0.572692	0.516091	RDX	1
GO:0034140	negative regulation of toll-like receptor 3 signaling pathway	1/1007	3/16374	0.173396	0.572692	0.516091	UBQLN1	1
GO:0034315	regulation of Arp2/3 complex-mediated actin nucleation	1/1007	3/16374	0.173396	0.572692	0.516091	ARF1	1
GO:0034377	plasma lipoprotein particle assembly	1/1007	3/16374	0.173396	0.572692	0.516091	ABCA1	1
GO:0034625	fatty acid elongation, monounsaturated fatty acid	1/1007	3/16374	0.173396	0.572692	0.516091	ELOVL5	1
GO:0035166	post-embryonic hemopoiesis	1/1007	3/16374	0.173396	0.572692	0.516091	MYO1E	1
GO:0035268	protein mannosylation	1/1007	3/16374	0.173396	0.572692	0.516091	DPM1	1
GO:0035669	TRAM-dependent toll-like receptor 4 signaling pathway	1/1007	3/16374	0.173396	0.572692	0.516091	PRKCE	1
GO:0035684	helper T cell extravasation	1/1007	3/16374	0.173396	0.572692	0.516091	CRK	1
GO:0035728	response to hepatocyte growth factor	1/1007	3/16374	0.173396	0.572692	0.516091	CRK	1
GO:0035794	positive regulation of mitochondrial membrane permeability	1/1007	3/16374	0.173396	0.572692	0.516091	TP53	1
GO:0035938	estradiol secretion	1/1007	3/16374	0.173396	0.572692	0.516091	SPP1	1
GO:0035984	cellular response to trichostatin A	1/1007	3/16374	0.173396	0.572692	0.516091	EZH2	1
GO:0035986	senescence-associated heterochromatin focus assembly	1/1007	3/16374	0.173396	0.572692	0.516091	HMGA2	1
GO:0036023	embryonic skeletal limb joint morphogenesis	1/1007	3/16374	0.173396	0.572692	0.516091	CTNNB1	1
GO:0038172	interleukin-33-mediated signaling pathway	1/1007	3/16374	0.173396	0.572692	0.516091	IL1RAP	1
GO:0042148	strand invasion	1/1007	3/16374	0.173396	0.572692	0.516091	WRN	1
GO:0042986	positive regulation of amyloid precursor protein biosynthetic process	1/1007	3/16374	0.173396	0.572692	0.516091	PAWR	1
GO:0043331	response to dsRNA	1/1007	3/16374	0.173396	0.572692	0.516091	NPM1	1
GO:0043415	positive regulation of skeletal muscle tissue regeneration	1/1007	3/16374	0.173396	0.572692	0.516091	TGFBR2	1
GO:0044208	'de novo' AMP biosynthetic process	1/1007	3/16374	0.173396	0.572692	0.516091	ADSS	1
GO:0044336	canonical Wnt signaling pathway involved in negative regulation of apoptotic process	1/1007	3/16374	0.173396	0.572692	0.516091	CTNNB1	1
GO:0044752	response to human chorionic gonadotropin	1/1007	3/16374	0.173396	0.572692	0.516091	GCLM	1
GO:0045163	clustering of voltage-gated potassium channels	1/1007	3/16374	0.173396	0.572692	0.516091	CNTNAP2	1
GO:0045200	establishment of neuroblast polarity	1/1007	3/16374	0.173396	0.572692	0.516091	FGF13	1
GO:0045726	positive regulation of integrin biosynthetic process	1/1007	3/16374	0.173396	0.572692	0.516091	TGFB2	1
GO:0046473	phosphatidic acid metabolic process	1/1007	3/16374	0.173396	0.572692	0.516091	DGKH	1
GO:0046883	regulation of hormone secretion	1/1007	3/16374	0.173396	0.572692	0.516091	ANXA1	1
GO:0046886	positive regulation of hormone biosynthetic process	1/1007	3/16374	0.173396	0.572692	0.516091	EGR1	1
GO:0048014	Tie signaling pathway	1/1007	3/16374	0.173396	0.572692	0.516091	ANGPT2	1
GO:0048145	regulation of fibroblast proliferation	1/1007	3/16374	0.173396	0.572692	0.516091	CTNNB1	1
GO:0048162	multi-layer follicle stage	1/1007	3/16374	0.173396	0.572692	0.516091	ZNF830	1
GO:0048633	positive regulation of skeletal muscle tissue growth	1/1007	3/16374	0.173396	0.572692	0.516091	DLL1	1
GO:0048742	regulation of skeletal muscle fiber development	1/1007	3/16374	0.173396	0.572692	0.516091	FBXO22	1
GO:0051097	negative regulation of helicase activity	1/1007	3/16374	0.173396	0.572692	0.516091	TP53	1
GO:0051252	regulation of RNA metabolic process	1/1007	3/16374	0.173396	0.572692	0.516091	NOVA1	1
GO:0051684	maintenance of Golgi location	1/1007	3/16374	0.173396	0.572692	0.516091	ARHGAP21	1
GO:0051795	positive regulation of timing of catagen	1/1007	3/16374	0.173396	0.572692	0.516091	TGFB2	1
GO:0052405	negative regulation by host of symbiont molecular function	1/1007	3/16374	0.173396	0.572692	0.516091	ANXA2	1
GO:0055005	ventricular cardiac myofibril assembly	1/1007	3/16374	0.173396	0.572692	0.516091	MEF2A	1
GO:0055059	asymmetric neuroblast division	1/1007	3/16374	0.173396	0.572692	0.516091	ARHGEF2	1
GO:0060066	oviduct development	1/1007	3/16374	0.173396	0.572692	0.516091	CTNNB1	1
GO:0060086	circadian temperature homeostasis	1/1007	3/16374	0.173396	0.572692	0.516091	EGR1	1
GO:0060212	negative regulation of nuclear-transcribed mRNA poly(A) tail shortening	1/1007	3/16374	0.173396	0.572692	0.516091	TENT4A	1
GO:0060424	lung field specification	1/1007	3/16374	0.173396	0.572692	0.516091	CTNNB1	1
GO:0060492	lung induction	1/1007	3/16374	0.173396	0.572692	0.516091	CTNNB1	1
GO:0060633	negative regulation of transcription initiation from RNA polymerase II promoter	1/1007	3/16374	0.173396	0.572692	0.516091	ZNF451	1
GO:0060715	syncytiotrophoblast cell differentiation involved in labyrinthine layer development	1/1007	3/16374	0.173396	0.572692	0.516091	DNAJB6	1
GO:0060769	positive regulation of epithelial cell proliferation involved in prostate gland development	1/1007	3/16374	0.173396	0.572692	0.516091	CTNNB1	1
GO:0060838	lymphatic endothelial cell fate commitment	1/1007	3/16374	0.173396	0.572692	0.516091	PDPN	1
GO:0060988	lipid tube assembly	1/1007	3/16374	0.173396	0.572692	0.516091	SNX9	1
GO:0061033	secretion by lung epithelial cell involved in lung growth	1/1007	3/16374	0.173396	0.572692	0.516091	TMEM38B	1
GO:0061101	neuroendocrine cell differentiation	1/1007	3/16374	0.173396	0.572692	0.516091	BCCIP	1
GO:0061107	seminal vesicle development	1/1007	3/16374	0.173396	0.572692	0.516091	SERPINE2	1
GO:0061198	fungiform papilla formation	1/1007	3/16374	0.173396	0.572692	0.516091	CTNNB1	1
GO:0061364	apoptotic process involved in luteolysis	1/1007	3/16374	0.173396	0.572692	0.516091	SLIT2	1
GO:0061548	ganglion development	1/1007	3/16374	0.173396	0.572692	0.516091	NRP2	1
GO:0061643	chemorepulsion of axon	1/1007	3/16374	0.173396	0.572692	0.516091	NTN1	1
GO:0061739	protein lipidation involved in autophagosome assembly	1/1007	3/16374	0.173396	0.572692	0.516091	ATG5	1
GO:0061740	protein targeting to lysosome involved in chaperone-mediated autophagy	1/1007	3/16374	0.173396	0.572692	0.516091	HSPA8	1
GO:0070084	protein initiator methionine removal	1/1007	3/16374	0.173396	0.572692	0.516091	METAP2	1
GO:0070141	response to UV-A	1/1007	3/16374	0.173396	0.572692	0.516091	EGFR	1
GO:0070370	cellular heat acclimation	1/1007	3/16374	0.173396	0.572692	0.516091	HSPA1A	1
GO:0070434	positive regulation of nucleotide-binding oligomerization domain containing 2 signaling pathway	1/1007	3/16374	0.173396	0.572692	0.516091	HSPA1A	1
GO:0070537	histone H2A K63-linked deubiquitination	1/1007	3/16374	0.173396	0.572692	0.516091	USP16	1
GO:0070562	regulation of vitamin D receptor signaling pathway	1/1007	3/16374	0.173396	0.572692	0.516091	TRIM24	1
GO:0070601	centromeric sister chromatid cohesion	1/1007	3/16374	0.173396	0.572692	0.516091	CTNNB1	1
GO:0070602	regulation of centromeric sister chromatid cohesion	1/1007	3/16374	0.173396	0.572692	0.516091	CTNNB1	1
GO:0070682	proteasome regulatory particle assembly	1/1007	3/16374	0.173396	0.572692	0.516091	PSMD5	1
GO:0070816	phosphorylation of RNA polymerase II C-terminal domain	1/1007	3/16374	0.173396	0.572692	0.516091	CDK13	1
GO:0071034	CUT catabolic process	1/1007	3/16374	0.173396	0.572692	0.516091	DIS3	1
GO:0071288	cellular response to mercury ion	1/1007	3/16374	0.173396	0.572692	0.516091	UBE2D3	1
GO:0071386	cellular response to corticosterone stimulus	1/1007	3/16374	0.173396	0.572692	0.516091	ATP2B1	1
GO:0071492	cellular response to UV-A	1/1007	3/16374	0.173396	0.572692	0.516091	PPID	1
GO:0071501	cellular response to sterol depletion	1/1007	3/16374	0.173396	0.572692	0.516091	FBXW7	1
GO:0071578	zinc ion import across plasma membrane	1/1007	3/16374	0.173396	0.572692	0.516091	SLC39A14	1
GO:0071947	protein deubiquitination involved in ubiquitin-dependent protein catabolic process	1/1007	3/16374	0.173396	0.572692	0.516091	USP9X	1
GO:0071962	mitotic sister chromatid cohesion, centromeric	1/1007	3/16374	0.173396	0.572692	0.516091	NAA50	1
GO:0072102	glomerulus morphogenesis	1/1007	3/16374	0.173396	0.572692	0.516091	MTSS1	1
GO:0072262	metanephric glomerular mesangial cell proliferation involved in metanephros development	1/1007	3/16374	0.173396	0.572692	0.516091	EGR1	1
GO:0072665	protein localization to vacuole	1/1007	3/16374	0.173396	0.572692	0.516091	ROCK2	1
GO:0072709	cellular response to sorbitol	1/1007	3/16374	0.173396	0.572692	0.516091	MAP2K4	1
GO:0090022	regulation of neutrophil chemotaxis	1/1007	3/16374	0.173396	0.572692	0.516091	JAM3	1
GO:0090234	regulation of kinetochore assembly	1/1007	3/16374	0.173396	0.572692	0.516091	RNF4	1
GO:0090261	positive regulation of inclusion body assembly	1/1007	3/16374	0.173396	0.572692	0.516091	HSF1	1
GO:0090311	regulation of protein deacetylation	1/1007	3/16374	0.173396	0.572692	0.516091	SPRED1	1
GO:0097374	sensory neuron axon guidance	1/1007	3/16374	0.173396	0.572692	0.516091	NRP2	1
GO:0097694	establishment of RNA localization to telomere	1/1007	3/16374	0.173396	0.572692	0.516091	ATR	1
GO:0097695	establishment of protein-containing complex localization to telomere	1/1007	3/16374	0.173396	0.572692	0.516091	ATR	1
GO:0097745	mitochondrial tRNA 5'-end processing	1/1007	3/16374	0.173396	0.572692	0.516091	TRMT10C	1
GO:0098749	cerebellar neuron development	1/1007	3/16374	0.173396	0.572692	0.516091	CRK	1
GO:0098759	cellular response to interleukin-8	1/1007	3/16374	0.173396	0.572692	0.516091	EGR1	1
GO:0098840	protein transport along microtubule	1/1007	3/16374	0.173396	0.572692	0.516091	BAG3	1
GO:0098963	dendritic transport of messenger ribonucleoprotein complex	1/1007	3/16374	0.173396	0.572692	0.516091	HNRNPU	1
GO:0099545	trans-synaptic signaling by trans-synaptic complex	1/1007	3/16374	0.173396	0.572692	0.516091	IL1RAP	1
GO:0099557	trans-synaptic signaling by trans-synaptic complex, modulating synaptic transmission	1/1007	3/16374	0.173396	0.572692	0.516091	EPHB2	1
GO:0110025	DNA strand resection involved in replication fork processing	1/1007	3/16374	0.173396	0.572692	0.516091	ZNF365	1
GO:0140059	dendrite arborization	1/1007	3/16374	0.173396	0.572692	0.516091	ZNF365	1
GO:1900625	positive regulation of monocyte aggregation	1/1007	3/16374	0.173396	0.572692	0.516091	CD44	1
GO:1900746	regulation of vascular endothelial growth factor signaling pathway	1/1007	3/16374	0.173396	0.572692	0.516091	DLL1	1
GO:1901026	ripoptosome assembly involved in necroptotic process	1/1007	3/16374	0.173396	0.572692	0.516091	CYLD	1
GO:1901895	negative regulation of ATPase-coupled calcium transmembrane transporter activity	1/1007	3/16374	0.173396	0.572692	0.516091	THADA	1
GO:1902037	negative regulation of hematopoietic stem cell differentiation	1/1007	3/16374	0.173396	0.572692	0.516091	HSPA9	1
GO:1902164	positive regulation of DNA damage response, signal transduction by p53 class mediator resulting in transcription of p21 class mediator	1/1007	3/16374	0.173396	0.572692	0.516091	RPL26	1
GO:1902306	negative regulation of sodium ion transmembrane transport	1/1007	3/16374	0.173396	0.572692	0.516091	CAMK2D	1
GO:1902661	positive regulation of glucose mediated signaling pathway	1/1007	3/16374	0.173396	0.572692	0.516091	SMARCA4	1
GO:1902722	positive regulation of prolactin secretion	1/1007	3/16374	0.173396	0.572692	0.516091	EGFR	1
GO:1902751	positive regulation of cell cycle G2/M phase transition	1/1007	3/16374	0.173396	0.572692	0.516091	NPM1	1
GO:1902775	mitochondrial large ribosomal subunit assembly	1/1007	3/16374	0.173396	0.572692	0.516091	FASTKD2	1
GO:1902951	negative regulation of dendritic spine maintenance	1/1007	3/16374	0.173396	0.572692	0.516091	GRIN2B	1
GO:1903070	negative regulation of ER-associated ubiquitin-dependent protein catabolic process	1/1007	3/16374	0.173396	0.572692	0.516091	USP14	1
GO:1903288	positive regulation of potassium ion import across plasma membrane	1/1007	3/16374	0.173396	0.572692	0.516091	ATP1B3	1
GO:1903375	facioacoustic ganglion development	1/1007	3/16374	0.173396	0.572692	0.516091	NRP2	1
GO:1903421	regulation of synaptic vesicle recycling	1/1007	3/16374	0.173396	0.572692	0.516091	FGF14	1
GO:1903551	regulation of extracellular exosome assembly	1/1007	3/16374	0.173396	0.572692	0.516091	STAM	1
GO:1903575	cornified envelope assembly	1/1007	3/16374	0.173396	0.572692	0.516091	UGCG	1
GO:1903660	negative regulation of complement-dependent cytotoxicity	1/1007	3/16374	0.173396	0.572692	0.516091	HSP90AB1	1
GO:1903679	positive regulation of cap-independent translational initiation	1/1007	3/16374	0.173396	0.572692	0.516091	YTHDF2	1
GO:1903862	positive regulation of oxidative phosphorylation	1/1007	3/16374	0.173396	0.572692	0.516091	VCP	1
GO:1904024	negative regulation of glucose catabolic process to lactate via pyruvate	1/1007	3/16374	0.173396	0.572692	0.516091	TP53	1
GO:1904036	negative regulation of epithelial cell apoptotic process	1/1007	3/16374	0.173396	0.572692	0.516091	HMOX1	1
GO:1904059	regulation of locomotor rhythm	1/1007	3/16374	0.173396	0.572692	0.516091	ZFHX3	1
GO:1904219	positive regulation of CDP-diacylglycerol-serine O-phosphatidyltransferase activity	1/1007	3/16374	0.173396	0.572692	0.516091	SERINC5	1
GO:1904222	positive regulation of serine C-palmitoyltransferase activity	1/1007	3/16374	0.173396	0.572692	0.516091	SERINC5	1
GO:1904582	positive regulation of intracellular mRNA localization	1/1007	3/16374	0.173396	0.572692	0.516091	DHX36	1
GO:1904845	cellular response to L-glutamine	1/1007	3/16374	0.173396	0.572692	0.516091	HSF1	1
GO:1905167	positive regulation of lysosomal protein catabolic process	1/1007	3/16374	0.173396	0.572692	0.516091	LDLR	1
GO:1905205	positive regulation of connective tissue replacement	1/1007	3/16374	0.173396	0.572692	0.516091	ROCK2	1
GO:1905224	clathrin-coated pit assembly	1/1007	3/16374	0.173396	0.572692	0.516091	GAK	1
GO:1905337	positive regulation of aggrephagy	1/1007	3/16374	0.173396	0.572692	0.516091	BAG3	1
GO:1905870	positive regulation of 3'-UTR-mediated mRNA stabilization	1/1007	3/16374	0.173396	0.572692	0.516091	TENT4A	1
GO:1990074	polyuridylation-dependent mRNA catabolic process	1/1007	3/16374	0.173396	0.572692	0.516091	TUT7	1
GO:1990180	mitochondrial tRNA 3'-end processing	1/1007	3/16374	0.173396	0.572692	0.516091	TRMT10C	1
GO:1990442	intrinsic apoptotic signaling pathway in response to nitrosative stress	1/1007	3/16374	0.173396	0.572692	0.516091	DNAJA1	1
GO:2000050	regulation of non-canonical Wnt signaling pathway	1/1007	3/16374	0.173396	0.572692	0.516091	TIAM1	1
GO:2000058	regulation of ubiquitin-dependent protein catabolic process	1/1007	3/16374	0.173396	0.572692	0.516091	UBE3A	1
GO:2000120	positive regulation of sodium-dependent phosphate transport	1/1007	3/16374	0.173396	0.572692	0.516091	ATF4	1
GO:2000269	regulation of fibroblast apoptotic process	1/1007	3/16374	0.173396	0.572692	0.516091	TP53	1
GO:2000278	regulation of DNA biosynthetic process	1/1007	3/16374	0.173396	0.572692	0.516091	CDKN1A	1
GO:2000299	negative regulation of Rho-dependent protein serine/threonine kinase activity	1/1007	3/16374	0.173396	0.572692	0.516091	CHORDC1	1
GO:2000312	regulation of kainate selective glutamate receptor activity	1/1007	3/16374	0.173396	0.572692	0.516091	NETO2	1
GO:2000564	regulation of CD8-positive, alpha-beta T cell proliferation	1/1007	3/16374	0.173396	0.572692	0.516091	SH3RF1	1
GO:2000588	positive regulation of platelet-derived growth factor receptor-beta signaling pathway	1/1007	3/16374	0.173396	0.572692	0.516091	HIP1	1
GO:2000619	negative regulation of histone H4-K16 acetylation	1/1007	3/16374	0.173396	0.572692	0.516091	ATG5	1
GO:2000807	regulation of synaptic vesicle clustering	1/1007	3/16374	0.173396	0.572692	0.516091	PCDH17	1
GO:0060071	Wnt signaling pathway, planar cell polarity pathway	9/1007	102/16374	0.175304	0.578517	0.52134	TIAM1/PSME4/PSMD1/PSMD12/PSMA7/PSMB7/PSMD14/PSMD5/GPC6	9
GO:1901137	carbohydrate derivative biosynthetic process	7/1007	75/16374	0.177214	0.584338	0.526586	PMM2/MAN2A1/GALNT17/PSEN1/EXT1/ST8SIA4/LARGE1	7
GO:0010634	positive regulation of epithelial cell migration	4/1007	36/16374	0.178134	0.585161	0.527327	TGFBR2/ITGA3/PRKCE/TGFB2	4
GO:0045746	negative regulation of Notch signaling pathway	4/1007	36/16374	0.178134	0.585161	0.527327	EGFR/NFKBIA/YTHDF2/FBXW7	4
GO:0150063	visual system development	4/1007	36/16374	0.178134	0.585161	0.527327	SIPA1L3/RAB18/SMOC1/TGFB2	4
GO:0001701	in utero embryonic development	16/1007	202/16374	0.179856	0.585161	0.527327	ACVR1/EGFR/ANKRD11/HSF1/ITGB1/MAN2A1/TGFBR2/MYO1E/CHD7/RRN3/TP53/TPM1/CTNNB1/YBX1/CAPN2/UBE2B	16
GO:0003206	cardiac chamber morphogenesis	6/1007	62/16374	0.180295	0.585161	0.527327	MDM2/SOX4/CHD7/TP53/TPM1/TGFB2	6
GO:0040008	regulation of growth	6/1007	62/16374	0.180295	0.585161	0.527327	GAP43/HMGA2/DLL1/SAFB/MORF4L2/SOCS6	6
GO:0098662	inorganic cation transmembrane transport	6/1007	62/16374	0.180295	0.585161	0.527327	CAMK2D/DPP6/ARF1/FLNA/KCNIP4/CACNA1D	6
GO:0002062	chondrocyte differentiation	8/1007	89/16374	0.180667	0.585161	0.527327	SULF2/CHST11/HMGA2/POR/CTNNB1/EIF2AK3/CHSY1/SERPINH1	8
GO:0030041	actin filament polymerization	8/1007	89/16374	0.180667	0.585161	0.527327	CTTN/TTC17/PRKCE/ARPC2/SNX9/SLIT2/FHOD3/PAK3	8
GO:0001678	cellular glucose homeostasis	3/1007	24/16374	0.180728	0.585161	0.527327	RAF1/FOXK2/NUCKS1	3
GO:0002053	positive regulation of mesenchymal cell proliferation	3/1007	24/16374	0.180728	0.585161	0.527327	TGFBR2/PRRX1/CTNNB1	3
GO:0014808	release of sequestered calcium ion into cytosol by sarcoplasmic reticulum	3/1007	24/16374	0.180728	0.585161	0.527327	CAMK2D/TMEM38B/CHD7	3
GO:0022411	cellular component disassembly	3/1007	24/16374	0.180728	0.585161	0.527327	IGF1R/PDPN/DDR2	3
GO:0038084	vascular endothelial growth factor signaling pathway	3/1007	24/16374	0.180728	0.585161	0.527327	DLL1/NRP2/ROBO1	3
GO:0043044	ATP-dependent chromatin remodeling	3/1007	24/16374	0.180728	0.585161	0.527327	MBD2/RBBP4/SMARCA4	3
GO:0044728	DNA methylation or demethylation	3/1007	24/16374	0.180728	0.585161	0.527327	MBD2/OTUD4/USP9X	3
GO:0055072	iron ion homeostasis	3/1007	24/16374	0.180728	0.585161	0.527327	HMOX1/FTL/SLC25A37	3
GO:0061647	histone H3-K9 modification	3/1007	24/16374	0.180728	0.585161	0.527327	ZNF451/RIF1/KDM1A	3
GO:0062009	secondary palate development	3/1007	24/16374	0.180728	0.585161	0.527327	TGFBR2/CHD7/TGFB2	3
GO:0060395	SMAD protein signal transduction	5/1007	49/16374	0.181316	0.585161	0.527327	VIM/SMAD5/WWTR1/SUB1/TGFB2	5
GO:0006890	retrograde vesicle-mediated transport, Golgi to endoplasmic reticulum	7/1007	76/16374	0.185614	0.585161	0.527327	RER1/ARFGAP3/COPA/SCFD1/COPB2/KIF2A/STX18	7
GO:0021987	cerebral cortex development	7/1007	76/16374	0.185614	0.585161	0.527327	EGFR/CRK/FLNA/KDM1A/CNTNAP2/PSEN1/FGF13	7
GO:0002087	regulation of respiratory gaseous exchange by nervous system process	2/1007	13/16374	0.188513	0.585161	0.527327	PBX3/TSHZ3	2
GO:0003179	heart valve morphogenesis	2/1007	13/16374	0.188513	0.585161	0.527327	ADAMTS9/TGFB2	2
GO:0003230	cardiac atrium development	2/1007	13/16374	0.188513	0.585161	0.527327	MDM2/MDM4	2
GO:0006376	mRNA splice site selection	2/1007	13/16374	0.188513	0.585161	0.527327	KHDC4/YTHDC1	2
GO:0006665	sphingolipid metabolic process	2/1007	13/16374	0.188513	0.585161	0.527327	SERINC5/SPTLC1	2
GO:0007431	salivary gland development	2/1007	13/16374	0.188513	0.585161	0.527327	EGFR/TGFB2	2
GO:0009303	rRNA transcription	2/1007	13/16374	0.188513	0.585161	0.527327	NIFK/TP53	2
GO:0010745	negative regulation of macrophage derived foam cell differentiation	2/1007	13/16374	0.188513	0.585161	0.527327	NFKBIA/ABCA1	2
GO:0015909	long-chain fatty acid transport	2/1007	13/16374	0.188513	0.585161	0.527327	PLIN2/EPRS	2
GO:0016246	RNA interference	2/1007	13/16374	0.188513	0.585161	0.527327	ADAR/XPO5	2
GO:0030048	actin filament-based movement	2/1007	13/16374	0.188513	0.585161	0.527327	MYO1E/MYO9B	2
GO:0030837	negative regulation of actin filament polymerization	2/1007	13/16374	0.188513	0.585161	0.527327	SLIT2/FHOD3	2
GO:0031054	pre-miRNA processing	2/1007	13/16374	0.188513	0.585161	0.527327	ADAR/TUT7	2
GO:0032288	myelin assembly	2/1007	13/16374	0.188513	0.585161	0.527327	NFASC/MTMR2	2
GO:0033120	positive regulation of RNA splicing	2/1007	13/16374	0.188513	0.585161	0.527327	POLR2A/HSPA1A	2
GO:0035563	positive regulation of chromatin binding	2/1007	13/16374	0.188513	0.585161	0.527327	MBD2/KDM1A	2
GO:0038007	netrin-activated signaling pathway	2/1007	13/16374	0.188513	0.585161	0.527327	DSCAM/NTN1	2
GO:0042033	chemokine biosynthetic process	2/1007	13/16374	0.188513	0.585161	0.527327	HMOX1/EGR1	2
GO:0043101	purine-containing compound salvage	2/1007	13/16374	0.188513	0.585161	0.527327	HPRT1/DGUOK	2
GO:0043951	negative regulation of cAMP-mediated signaling	2/1007	13/16374	0.188513	0.585161	0.527327	PDE10A/UBE2B	2
GO:0046685	response to arsenic-containing substance	2/1007	13/16374	0.188513	0.585161	0.527327	CDKN1A/RNF4	2
GO:0050655	dermatan sulfate proteoglycan metabolic process	2/1007	13/16374	0.188513	0.585161	0.527327	UST/DSEL	2
GO:0051123	RNA polymerase II preinitiation complex assembly	2/1007	13/16374	0.188513	0.585161	0.527327	TAF1/TP53	2
GO:0060219	camera-type eye photoreceptor cell differentiation	2/1007	13/16374	0.188513	0.585161	0.527327	DSCAM/CCDC66	2
GO:0061572	actin filament bundle organization	2/1007	13/16374	0.188513	0.585161	0.527327	FLNA/RDX	2
GO:0070208	protein heterotrimerization	2/1007	13/16374	0.188513	0.585161	0.527327	GNB1/NUP58	2
GO:0097479	synaptic vesicle localization	2/1007	13/16374	0.188513	0.585161	0.527327	ARF1/PCDH17	2
GO:1900025	negative regulation of substrate adhesion-dependent cell spreading	2/1007	13/16374	0.188513	0.585161	0.527327	ACTN4/CORO1C	2
GO:1903204	negative regulation of oxidative stress-induced neuron death	2/1007	13/16374	0.188513	0.585161	0.527327	ATF4/CTNNB1	2
GO:1903364	positive regulation of cellular protein catabolic process	2/1007	13/16374	0.188513	0.585161	0.527327	HSP90AA1/RDX	2
GO:2000810	regulation of bicellular tight junction assembly	2/1007	13/16374	0.188513	0.585161	0.527327	CBFB/RUNX1	2
GO:0006605	protein targeting	11/1007	132/16374	0.188981	0.585161	0.527327	USP36/RPL11/HSPA4/UBE2D3/HSP90AA1/FBXW7/TOMM7/YWHAB/BAG3/ARIH2/CEMIP	11
GO:0042147	retrograde transport, endosome to Golgi	6/1007	63/16374	0.189696	0.585161	0.527327	VPS53/VTI1A/SNX1/TMEM87A/GOSR1/TBC1D23	6
GO:0071277	cellular response to calcium ion	6/1007	63/16374	0.189696	0.585161	0.527327	CAMK2D/KCNH1/MEF2A/CACYBP/FUS/LGMN	6
GO:0006296	nucleotide-excision repair, DNA incision, 5'-to lesion	4/1007	37/16374	0.190715	0.585161	0.527327	UBB/RFC3/RPS27A/UBC	4
GO:0006656	phosphatidylcholine biosynthetic process	4/1007	37/16374	0.190715	0.585161	0.527327	CSNK2A1/CAPN2/LPIN1/ACSL3	4
GO:0030239	myofibril assembly	4/1007	37/16374	0.190715	0.585161	0.527327	ITGB1/TPM1/ACTG1/FHOD3	4
GO:0035265	organ growth	4/1007	37/16374	0.190715	0.585161	0.527327	TMEM38B/DLL1/SERP1/WWC1	4
GO:0043536	positive regulation of blood vessel endothelial cell migration	4/1007	37/16374	0.190715	0.585161	0.527327	ADAM17/TMSB4X/AMOTL1/HSPB1	4
GO:0045022	early endosome to late endosome transport	4/1007	37/16374	0.190715	0.585161	0.527327	EEA1/MTMR2/RDX/SNX3	4
GO:0003300	cardiac muscle hypertrophy	5/1007	50/16374	0.192036	0.585161	0.527327	CAMK2D/MEF2A/TIAM1/GLRX3/ROCK2	5
GO:0010923	negative regulation of phosphatase activity	5/1007	50/16374	0.192036	0.585161	0.527327	SPOCD1/SYTL2/CEP192/URI1/SPRED1	5
GO:0019226	transmission of nerve impulse	5/1007	50/16374	0.192036	0.585161	0.527327	GRIK2/NRCAM/JAM3/NFASC/CNTNAP2	5
GO:0021510	spinal cord development	5/1007	50/16374	0.192036	0.585161	0.527327	DRAXIN/PBX3/SOX4/DLL1/BAG3	5
GO:0051604	protein maturation	5/1007	50/16374	0.192036	0.585161	0.527327	SERPINE2/MDM2/LDLRAD3/HSPD1/SERPINH1	5
GO:0048515	spermatid differentiation	7/1007	77/16374	0.194175	0.585161	0.527327	CDYL/NSUN2/JAM3/MAST2/SLIRP/FNDC3A/NECTIN3	7
GO:0061351	neural precursor cell proliferation	8/1007	91/16374	0.196299	0.585161	0.527327	DIXDC1/RAPGEF1/TP53/IFT20/ORC3/FLNA/CTNNB1/KDM1A	8
GO:0006471	protein ADP-ribosylation	3/1007	25/16374	0.196622	0.585161	0.527327	PUM3/TNKS/WARS	3
GO:0006851	mitochondrial calcium ion transmembrane transport	3/1007	25/16374	0.196622	0.585161	0.527327	YME1L1/VDAC1/PMPCB	3
GO:0009954	proximal/distal pattern formation	3/1007	25/16374	0.196622	0.585161	0.527327	DLL1/CTNNB1/CHSY1	3
GO:0031018	endocrine pancreas development	3/1007	25/16374	0.196622	0.585161	0.527327	SOX4/EIF2AK3/IL6R	3
GO:0045740	positive regulation of DNA replication	3/1007	25/16374	0.196622	0.585161	0.527327	EGFR/CACYBP/MAP2K4	3
GO:0060384	innervation	3/1007	25/16374	0.196622	0.585161	0.527327	SERPINE2/SULF2/CHD7	3
GO:1900740	positive regulation of protein insertion into mitochondrial membrane involved in apoptotic signaling pathway	3/1007	25/16374	0.196622	0.585161	0.527327	TP53/YWHAB/TFDP2	3
GO:0044344	cellular response to fibroblast growth factor stimulus	9/1007	105/16374	0.196914	0.585161	0.527327	CD44/HNRNPM/POLR2F/POLR2B/GCLM/POLR2A/HNRNPF/GTF2F2/SPRED1	9
GO:0050851	antigen receptor-mediated signaling pathway	6/1007	64/16374	0.199282	0.585161	0.527327	CBFB/ELF2/RUNX1/RPS3/CYLD/PAWR	6
GO:0001501	skeletal system development	19/1007	250/16374	0.199991	0.585161	0.527327	CHI3L1/CD44/SULF2/ANKRD11/TMEM38B/RPS6KA3/SOX4/SATB2/CHD7/PRRX1/SMAD5/RPL38/DSCAML1/EIF2AK3/SERP1/PSEN1/EXT1/PDGFC/TGFB2	19
GO:0014897	striated muscle hypertrophy	4/1007	38/16374	0.203564	0.585161	0.527327	CAMK2D/MEF2A/GLRX3/ROCK2	4
GO:0030501	positive regulation of bone mineralization	4/1007	38/16374	0.203564	0.585161	0.527327	ACVR1/FBN2/ATP2B1/ACVR2A	4
GO:0033683	nucleotide-excision repair, DNA incision	4/1007	38/16374	0.203564	0.585161	0.527327	UBB/RFC3/RPS27A/UBC	4
GO:0042149	cellular response to glucose starvation	4/1007	38/16374	0.203564	0.585161	0.527327	TP53/ATF4/EIF2AK3/IFI16	4
GO:0043666	regulation of phosphoprotein phosphatase activity	4/1007	38/16374	0.203564	0.585161	0.527327	PPP6R3/PPP2R2D/PPP2R3A/PPP2R2A	4
GO:0048880	sensory system development	4/1007	38/16374	0.203564	0.585161	0.527327	SIPA1L3/RAB18/SMOC1/TGFB2	4
GO:0099173	postsynapse organization	4/1007	38/16374	0.203564	0.585161	0.527327	NRCAM/NRP2/EPHB2/HSPA8	4
GO:0033002	muscle cell proliferation	8/1007	92/16374	0.204317	0.585161	0.527327	EGFR/HMOX1/PRKDC/MNAT1/TGFBR2/NAMPT/CTNNB1/IL6R	8
GO:0040007	growth	8/1007	92/16374	0.204317	0.585161	0.527327	GAP43/PRKDC/HMGA2/DLL1/PNPT1/SAFB/MORF4L2/SOCS6	8
GO:0045165	cell fate commitment	8/1007	92/16374	0.204317	0.585161	0.527327	GAP43/ITGB1/DLL1/PRRX1/DSCAML1/MCL1/CTNNB1/PSEN1	8
GO:0000288	nuclear-transcribed mRNA catabolic process, deadenylation-dependent decay	6/1007	65/16374	0.209041	0.585161	0.527327	DHX36/PABPC1/DIS3/TUT7/CNOT2/HBS1L	6
GO:0006625	protein targeting to peroxisome	6/1007	65/16374	0.209041	0.585161	0.527327	UBE2D3/UBB/ZFAND6/USP9X/RPS27A/UBC	6
GO:0001921	positive regulation of receptor recycling	2/1007	14/16374	0.211475	0.585161	0.527327	ANXA2/PSEN1	2
GO:0003416	endochondral bone growth	2/1007	14/16374	0.211475	0.585161	0.527327	BNC2/DDR2	2
GO:0007214	gamma-aminobutyric acid signaling pathway	2/1007	14/16374	0.211475	0.585161	0.527327	ATF4/PLCL1	2
GO:0009152	purine ribonucleotide biosynthetic process	2/1007	14/16374	0.211475	0.585161	0.527327	TMSB4X/VCP	2
GO:0009206	purine ribonucleoside triphosphate biosynthetic process	2/1007	14/16374	0.211475	0.585161	0.527327	TMSB4X/VCP	2
GO:0015804	neutral amino acid transport	2/1007	14/16374	0.211475	0.585161	0.527327	SLC38A1/SLC7A5	2
GO:0016242	negative regulation of macroautophagy	2/1007	14/16374	0.211475	0.585161	0.527327	HMOX1/USP36	2
GO:0017145	stem cell division	2/1007	14/16374	0.211475	0.585161	0.527327	WWTR1/GNL3	2
GO:0030488	tRNA methylation	2/1007	14/16374	0.211475	0.585161	0.527327	NSUN2/TRMT11	2
GO:0032469	endoplasmic reticulum calcium ion homeostasis	2/1007	14/16374	0.211475	0.585161	0.527327	CAMK2D/PSEN1	2
GO:0032486	Rap protein signal transduction	2/1007	14/16374	0.211475	0.585161	0.527327	RAPGEF1/RDX	2
GO:0033630	positive regulation of cell adhesion mediated by integrin	2/1007	14/16374	0.211475	0.585161	0.527327	ADAM9/TGFB2	2
GO:0035640	exploration behavior	2/1007	14/16374	0.211475	0.585161	0.527327	ITGA3/ABL2	2
GO:0050862	positive regulation of T cell receptor signaling pathway	2/1007	14/16374	0.211475	0.585161	0.527327	RPS3/CYLD	2
GO:0051770	positive regulation of nitric-oxide synthase biosynthetic process	2/1007	14/16374	0.211475	0.585161	0.527327	NAMPT/MAP2K4	2
GO:0060443	mammary gland morphogenesis	2/1007	14/16374	0.211475	0.585161	0.527327	TGFBR2/NTN1	2
GO:0061178	regulation of insulin secretion involved in cellular response to glucose stimulus	2/1007	14/16374	0.211475	0.585161	0.527327	TIAM1/PRKCE	2
GO:0071173	spindle assembly checkpoint	2/1007	14/16374	0.211475	0.585161	0.527327	TPR/PCID2	2
GO:0071174	mitotic spindle checkpoint	2/1007	14/16374	0.211475	0.585161	0.527327	TPR/PCID2	2
GO:0071391	cellular response to estrogen stimulus	2/1007	14/16374	0.211475	0.585161	0.527327	TRIM24/MDM2	2
GO:0071625	vocalization behavior	2/1007	14/16374	0.211475	0.585161	0.527327	CNTNAP2/NLGN4Y	2
GO:0072112	glomerular visceral epithelial cell differentiation	2/1007	14/16374	0.211475	0.585161	0.527327	MYO1E/PTPRO	2
GO:0072575	epithelial cell proliferation involved in liver morphogenesis	2/1007	14/16374	0.211475	0.585161	0.527327	SULF2/FBXW7	2
GO:0097202	activation of cysteine-type endopeptidase activity	2/1007	14/16374	0.211475	0.585161	0.527327	LGMN/IFI16	2
GO:0110148	biomineralization	2/1007	14/16374	0.211475	0.585161	0.527327	ROCK2/ATF4	2
GO:1902570	protein localization to nucleolus	2/1007	14/16374	0.211475	0.585161	0.527327	WRN/POLR1A	2
GO:0021766	hippocampus development	7/1007	79/16374	0.21175	0.585161	0.527327	CDK6/XRN2/TENT2/CRK/EIF2B3/EZH2/FGF13	7
GO:0000724	double-strand break repair via homologous recombination	9/1007	107/16374	0.211916	0.585161	0.527327	SMCHD1/SMC5/RBBP8/FUS/NUCKS1/ZNF365/PSMD14/RIF1/KDM1A	9
GO:0006323	DNA packaging	3/1007	26/16374	0.212837	0.585161	0.527327	PSME4/RBBP4/TP53	3
GO:0006906	vesicle fusion	3/1007	26/16374	0.212837	0.585161	0.527327	EEA1/ANXA2/ANXA1	3
GO:0015980	energy derivation by oxidation of organic compounds	3/1007	26/16374	0.212837	0.585161	0.527327	NDUFAF2/PNPT1/TRAP1	3
GO:0030206	chondroitin sulfate biosynthetic process	3/1007	26/16374	0.212837	0.585161	0.527327	CHST15/CHST11/CHSY1	3
GO:0065008	regulation of biological quality	3/1007	26/16374	0.212837	0.585161	0.527327	PTPRO/VCP/ETV5	3
GO:0070372	regulation of ERK1 and ERK2 cascade	3/1007	26/16374	0.212837	0.585161	0.527327	EGFR/TIAM1/NEK10	3
GO:0099560	synaptic membrane adhesion	3/1007	26/16374	0.212837	0.585161	0.527327	IGSF9B/IL1RAP/PCDH17	3
GO:2001234	negative regulation of apoptotic signaling pathway	3/1007	26/16374	0.212837	0.585161	0.527327	CSNK2A1/CTNNB1/PSEN1	3
GO:0008284	positive regulation of cell population proliferation	33/1007	464/16374	0.215326	0.585161	0.527327	BIRC6/EGFR/ADAM17/MDM2/HSF1/ODC1/TIAM1/ITGB1/TGFBR2/IGF1R/SOX4/DLL1/WWTR1/LGMN/NTN1/RPS9/NAMPT/RPL23/NPM1/CDK13/CSNK2A1/SLC25A33/MARCH7/DOT1L/CDC123/EZH2/IL6R/EAPP/SDCBP/KITLG/PDGFC/TGFB2/GAREM1	33
GO:2000134	negative regulation of G1/S transition of mitotic cell cycle	4/1007	39/16374	0.216659	0.585161	0.527327	CDK6/CDKN1A/EZH2/MYO16	4
GO:0007044	cell-substrate junction assembly	6/1007	66/16374	0.218965	0.585161	0.527327	S100A10/ROCK2/PEAK1/DAPK3/CORO1C/LIMS1	6
GO:0043009	chordate embryonic development	12/1007	151/16374	0.219078	0.585161	0.527327	ACVR1/EGFR/SULF2/PRKDC/HSF1/DLL1/AMBRA1/TP53/CTNNB1/CAPN2/PSEN1/ACVR2A	12
GO:0048659	smooth muscle cell proliferation	8/1007	94/16374	0.220732	0.585161	0.527327	EGFR/HMOX1/PRKDC/MNAT1/TGFBR2/NAMPT/CTNNB1/IL6R	8
GO:0042692	muscle cell differentiation	7/1007	80/16374	0.220752	0.585161	0.527327	MEF2A/MED28/CTNNB1/YBX1/MORF4L2/KDM1A/EZH2	7
GO:0000055	ribosomal large subunit export from nucleus	1/1007	4/16374	0.224241	0.585161	0.527327	XPO1	1
GO:0000154	rRNA modification	1/1007	4/16374	0.224241	0.585161	0.527327	NAT10	1
GO:0000463	maturation of LSU-rRNA from tricistronic rRNA transcript (SSU-rRNA, 5.8S rRNA, LSU-rRNA)	1/1007	4/16374	0.224241	0.585161	0.527327	GTPBP4	1
GO:0000480	endonucleolytic cleavage in 5'-ETS of tricistronic rRNA transcript (SSU-rRNA, 5.8S rRNA, LSU-rRNA)	1/1007	4/16374	0.224241	0.585161	0.527327	RCL1	1
GO:0001878	response to yeast	1/1007	4/16374	0.224241	0.585161	0.527327	CRK	1
GO:0001880	Mullerian duct regression	1/1007	4/16374	0.224241	0.585161	0.527327	SMAD5	1
GO:0002051	osteoblast fate commitment	1/1007	4/16374	0.224241	0.585161	0.527327	SMAD5	1
GO:0002190	cap-independent translational initiation	1/1007	4/16374	0.224241	0.585161	0.527327	YTHDF2	1
GO:0002265	astrocyte activation involved in immune response	1/1007	4/16374	0.224241	0.585161	0.527327	PSEN1	1
GO:0002513	tolerance induction to self antigen	1/1007	4/16374	0.224241	0.585161	0.527327	TGFBR2	1
GO:0002520	immune system development	1/1007	4/16374	0.224241	0.585161	0.527327	TROVE2	1
GO:0002638	negative regulation of immunoglobulin production	1/1007	4/16374	0.224241	0.585161	0.527327	PRKDC	1
GO:0002666	positive regulation of T cell tolerance induction	1/1007	4/16374	0.224241	0.585161	0.527327	TGFBR2	1
GO:0003105	negative regulation of glomerular filtration	1/1007	4/16374	0.224241	0.585161	0.527327	PTPRO	1
GO:0003137	Notch signaling pathway involved in heart induction	1/1007	4/16374	0.224241	0.585161	0.527327	ROBO1	1
GO:0003419	growth plate cartilage chondrocyte proliferation	1/1007	4/16374	0.224241	0.585161	0.527327	POR	1
GO:0003431	growth plate cartilage chondrocyte development	1/1007	4/16374	0.224241	0.585161	0.527327	TGFBR2	1
GO:0005981	regulation of glycogen catabolic process	1/1007	4/16374	0.224241	0.585161	0.527327	PPP1CB	1
GO:0006269	DNA replication, synthesis of RNA primer	1/1007	4/16374	0.224241	0.585161	0.527327	POLA1	1
GO:0006382	adenosine to inosine editing	1/1007	4/16374	0.224241	0.585161	0.527327	ADAR	1
GO:0006477	protein sulfation	1/1007	4/16374	0.224241	0.585161	0.527327	UST	1
GO:0006662	glycerol ether metabolic process	1/1007	4/16374	0.224241	0.585161	0.527327	TXN	1
GO:0006760	folic acid-containing compound metabolic process	1/1007	4/16374	0.224241	0.585161	0.527327	MTHFD1L	1
GO:0007007	inner mitochondrial membrane organization	1/1007	4/16374	0.224241	0.585161	0.527327	OPA1	1
GO:0007023	post-chaperonin tubulin folding pathway	1/1007	4/16374	0.224241	0.585161	0.527327	TBCA	1
GO:0007028	cytoplasm organization	1/1007	4/16374	0.224241	0.585161	0.527327	RRN3	1
GO:0007079	mitotic chromosome movement towards spindle pole	1/1007	4/16374	0.224241	0.585161	0.527327	KPNB1	1
GO:0007089	traversing start control point of mitotic cell cycle	1/1007	4/16374	0.224241	0.585161	0.527327	MDM2	1
GO:0009086	methionine biosynthetic process	1/1007	4/16374	0.224241	0.585161	0.527327	MTR	1
GO:0009157	deoxyribonucleoside monophosphate biosynthetic process	1/1007	4/16374	0.224241	0.585161	0.527327	DGUOK	1
GO:0009298	GDP-mannose biosynthetic process	1/1007	4/16374	0.224241	0.585161	0.527327	PMM2	1
GO:0009437	carnitine metabolic process	1/1007	4/16374	0.224241	0.585161	0.527327	POR	1
GO:0009992	cellular water homeostasis	1/1007	4/16374	0.224241	0.585161	0.527327	ANXA7	1
GO:0010025	wax biosynthetic process	1/1007	4/16374	0.224241	0.585161	0.527327	FAR2	1
GO:0010044	response to aluminum ion	1/1007	4/16374	0.224241	0.585161	0.527327	LONP1	1
GO:0010735	positive regulation of transcription via serum response element binding	1/1007	4/16374	0.224241	0.585161	0.527327	MKL1	1
GO:0010793	regulation of mRNA export from nucleus	1/1007	4/16374	0.224241	0.585161	0.527327	IWS1	1
GO:0010825	positive regulation of centrosome duplication	1/1007	4/16374	0.224241	0.585161	0.527327	ROCK2	1
GO:0010826	negative regulation of centrosome duplication	1/1007	4/16374	0.224241	0.585161	0.527327	NPM1	1
GO:0010883	regulation of lipid storage	1/1007	4/16374	0.224241	0.585161	0.527327	FBXW7	1
GO:0010941	regulation of cell death	1/1007	4/16374	0.224241	0.585161	0.527327	CRYAB	1
GO:0014045	establishment of endothelial blood-brain barrier	1/1007	4/16374	0.224241	0.585161	0.527327	CTNNB1	1
GO:0014834	skeletal muscle satellite cell maintenance involved in skeletal muscle regeneration	1/1007	4/16374	0.224241	0.585161	0.527327	EZH2	1
GO:0016080	synaptic vesicle targeting	1/1007	4/16374	0.224241	0.585161	0.527327	PSEN1	1
GO:0016101	diterpenoid metabolic process	1/1007	4/16374	0.224241	0.585161	0.527327	EGFR	1
GO:0016199	axon midline choice point recognition	1/1007	4/16374	0.224241	0.585161	0.527327	ROBO1	1
GO:0016926	protein desumoylation	1/1007	4/16374	0.224241	0.585161	0.527327	USPL1	1
GO:0018076	N-terminal peptidyl-lysine acetylation	1/1007	4/16374	0.224241	0.585161	0.527327	SOX4	1
GO:0019062	virion attachment to host cell	1/1007	4/16374	0.224241	0.585161	0.527327	HSP90AB1	1
GO:0019511	peptidyl-proline hydroxylation	1/1007	4/16374	0.224241	0.585161	0.527327	P3H2	1
GO:0019637	organophosphate metabolic process	1/1007	4/16374	0.224241	0.585161	0.527327	ARF1	1
GO:0019661	glucose catabolic process to lactate via pyruvate	1/1007	4/16374	0.224241	0.585161	0.527327	TP53	1
GO:0021681	cerebellar granular layer development	1/1007	4/16374	0.224241	0.585161	0.527327	SERPINE2	1
GO:0022009	central nervous system vasculogenesis	1/1007	4/16374	0.224241	0.585161	0.527327	CTNNB1	1
GO:0022615	protein to membrane docking	1/1007	4/16374	0.224241	0.585161	0.527327	SNX3	1
GO:0030035	microspike assembly	1/1007	4/16374	0.224241	0.585161	0.527327	MTSS1	1
GO:0030576	Cajal body organization	1/1007	4/16374	0.224241	0.585161	0.527327	USPL1	1
GO:0031099	regeneration	1/1007	4/16374	0.224241	0.585161	0.527327	PRRX1	1
GO:0031365	N-terminal protein amino acid modification	1/1007	4/16374	0.224241	0.585161	0.527327	METAP2	1
GO:0032079	positive regulation of endodeoxyribonuclease activity	1/1007	4/16374	0.224241	0.585161	0.527327	RPS3	1
GO:0032197	transposition, RNA-mediated	1/1007	4/16374	0.224241	0.585161	0.527327	TUT7	1
GO:0032264	IMP salvage	1/1007	4/16374	0.224241	0.585161	0.527327	HPRT1	1
GO:0032386	regulation of intracellular transport	1/1007	4/16374	0.224241	0.585161	0.527327	WWC1	1
GO:0032387	negative regulation of intracellular transport	1/1007	4/16374	0.224241	0.585161	0.527327	CRYAB	1
GO:0032417	positive regulation of sodium:proton antiporter activity	1/1007	4/16374	0.224241	0.585161	0.527327	ACTN4	1
GO:0032487	regulation of Rap protein signal transduction	1/1007	4/16374	0.224241	0.585161	0.527327	RDX	1
GO:0032815	negative regulation of natural killer cell activation	1/1007	4/16374	0.224241	0.585161	0.527327	PIBF1	1
GO:0032909	regulation of transforming growth factor beta2 production	1/1007	4/16374	0.224241	0.585161	0.527327	TGFB2	1
GO:0033133	positive regulation of glucokinase activity	1/1007	4/16374	0.224241	0.585161	0.527327	RANBP2	1
GO:0033314	mitotic DNA replication checkpoint	1/1007	4/16374	0.224241	0.585161	0.527327	ZNF830	1
GO:0033590	response to cobalamin	1/1007	4/16374	0.224241	0.585161	0.527327	EGFR	1
GO:0033600	negative regulation of mammary gland epithelial cell proliferation	1/1007	4/16374	0.224241	0.585161	0.527327	ROBO1	1
GO:0034436	glycoprotein transport	1/1007	4/16374	0.224241	0.585161	0.527327	GUK1	1
GO:0034626	fatty acid elongation, polyunsaturated fatty acid	1/1007	4/16374	0.224241	0.585161	0.527327	ELOVL5	1
GO:0034698	response to gonadotropin	1/1007	4/16374	0.224241	0.585161	0.527327	ITGA3	1
GO:0034729	histone H3-K79 methylation	1/1007	4/16374	0.224241	0.585161	0.527327	DOT1L	1
GO:0035112	genitalia morphogenesis	1/1007	4/16374	0.224241	0.585161	0.527327	CTNNB1	1
GO:0035303	regulation of dephosphorylation	1/1007	4/16374	0.224241	0.585161	0.527327	SMG6	1
GO:0035330	regulation of hippo signaling	1/1007	4/16374	0.224241	0.585161	0.527327	WWC1	1
GO:0035481	positive regulation of Notch signaling pathway involved in heart induction	1/1007	4/16374	0.224241	0.585161	0.527327	ROBO1	1
GO:0035522	monoubiquitinated histone H2A deubiquitination	1/1007	4/16374	0.224241	0.585161	0.527327	USP16	1
GO:0035583	sequestering of TGFbeta in extracellular matrix	1/1007	4/16374	0.224241	0.585161	0.527327	FBN2	1
GO:0035616	histone H2B conserved C-terminal lysine deubiquitination	1/1007	4/16374	0.224241	0.585161	0.527327	USP15	1
GO:0035751	regulation of lysosomal lumen pH	1/1007	4/16374	0.224241	0.585161	0.527327	TMEM165	1
GO:0035947	obsolete regulation of gluconeogenesis by regulation of transcription from RNA polymerase II promoter	1/1007	4/16374	0.224241	0.585161	0.527327	FOXK2	1
GO:0036476	neuron death in response to hydrogen peroxide	1/1007	4/16374	0.224241	0.585161	0.527327	RACK1	1
GO:0036481	intrinsic apoptotic signaling pathway in response to hydrogen peroxide	1/1007	4/16374	0.224241	0.585161	0.527327	TRAP1	1
GO:0036486	ventral trunk neural crest cell migration	1/1007	4/16374	0.224241	0.585161	0.527327	NRP2	1
GO:0040001	establishment of mitotic spindle localization	1/1007	4/16374	0.224241	0.585161	0.527327	KPNB1	1
GO:0042138	meiotic DNA double-strand break formation	1/1007	4/16374	0.224241	0.585161	0.527327	C11orf80	1
GO:0042159	lipoprotein catabolic process	1/1007	4/16374	0.224241	0.585161	0.527327	LDLR	1
GO:0042373	vitamin K metabolic process	1/1007	4/16374	0.224241	0.585161	0.527327	VKORC1L1	1
GO:0042637	catagen	1/1007	4/16374	0.224241	0.585161	0.527327	TGFB2	1
GO:0042772	DNA damage response, signal transduction resulting in transcription	1/1007	4/16374	0.224241	0.585161	0.527327	RPL26	1
GO:0043504	mitochondrial DNA repair	1/1007	4/16374	0.224241	0.585161	0.527327	TP53	1
GO:0043516	regulation of DNA damage response, signal transduction by p53 class mediator	1/1007	4/16374	0.224241	0.585161	0.527327	TP53	1
GO:0043558	regulation of translational initiation in response to stress	1/1007	4/16374	0.224241	0.585161	0.527327	NPM1	1
GO:0043987	histone H3-S10 phosphorylation	1/1007	4/16374	0.224241	0.585161	0.527327	VRK1	1
GO:0044571	[2Fe-2S] cluster assembly	1/1007	4/16374	0.224241	0.585161	0.527327	GLRX3	1
GO:0044773	mitotic DNA damage checkpoint	1/1007	4/16374	0.224241	0.585161	0.527327	PRKDC	1
GO:0045448	mitotic cell cycle, embryonic	1/1007	4/16374	0.224241	0.585161	0.527327	CTNNB1	1
GO:0045472	response to ether	1/1007	4/16374	0.224241	0.585161	0.527327	MDM2	1
GO:0045629	negative regulation of T-helper 2 cell differentiation	1/1007	4/16374	0.224241	0.585161	0.527327	ANXA1	1
GO:0045901	positive regulation of translational elongation	1/1007	4/16374	0.224241	0.585161	0.527327	USP16	1
GO:0045964	positive regulation of dopamine metabolic process	1/1007	4/16374	0.224241	0.585161	0.527327	HPRT1	1
GO:0046683	response to organophosphorus	1/1007	4/16374	0.224241	0.585161	0.527327	RFC3	1
GO:0046833	positive regulation of RNA export from nucleus	1/1007	4/16374	0.224241	0.585161	0.527327	CPSF6	1
GO:0046959	habituation	1/1007	4/16374	0.224241	0.585161	0.527327	DGKI	1
GO:0048133	male germ-line stem cell asymmetric division	1/1007	4/16374	0.224241	0.585161	0.527327	ETV5	1
GO:0048280	vesicle fusion with Golgi apparatus	1/1007	4/16374	0.224241	0.585161	0.527327	VTI1A	1
GO:0048549	positive regulation of pinocytosis	1/1007	4/16374	0.224241	0.585161	0.527327	ACTN4	1
GO:0048664	neuron fate determination	1/1007	4/16374	0.224241	0.585161	0.527327	PRRX1	1
GO:0050974	detection of mechanical stimulus involved in sensory perception	1/1007	4/16374	0.224241	0.585161	0.527327	SERPINE2	1
GO:0051047	positive regulation of secretion	1/1007	4/16374	0.224241	0.585161	0.527327	ACSL3	1
GO:0051138	positive regulation of NK T cell differentiation	1/1007	4/16374	0.224241	0.585161	0.527327	TGFBR2	1
GO:0051306	mitotic sister chromatid separation	1/1007	4/16374	0.224241	0.585161	0.527327	TPR	1
GO:0051409	response to nitrosative stress	1/1007	4/16374	0.224241	0.585161	0.527327	GCLM	1
GO:0051414	response to cortisol	1/1007	4/16374	0.224241	0.585161	0.527327	SLIT2	1
GO:0051972	regulation of telomerase activity	1/1007	4/16374	0.224241	0.585161	0.527327	SMG6	1
GO:0060011	Sertoli cell proliferation	1/1007	4/16374	0.224241	0.585161	0.527327	ACVR2A	1
GO:0060192	negative regulation of lipase activity	1/1007	4/16374	0.224241	0.585161	0.527327	POR	1
GO:0060574	intestinal epithelial cell maturation	1/1007	4/16374	0.224241	0.585161	0.527327	CDKN1A	1
GO:0060979	vasculogenesis involved in coronary vascular morphogenesis	1/1007	4/16374	0.224241	0.585161	0.527327	SPRED1	1
GO:0061084	negative regulation of protein refolding	1/1007	4/16374	0.224241	0.585161	0.527327	ST13	1
GO:0070375	ERK5 cascade	1/1007	4/16374	0.224241	0.585161	0.527327	MEF2A	1
GO:0070427	nucleotide-binding oligomerization domain containing 1 signaling pathway	1/1007	4/16374	0.224241	0.585161	0.527327	NFKBIA	1
GO:0070486	leukocyte aggregation	1/1007	4/16374	0.224241	0.585161	0.527327	CD44	1
GO:0070662	mast cell proliferation	1/1007	4/16374	0.224241	0.585161	0.527327	KITLG	1
GO:0070676	intralumenal vesicle formation	1/1007	4/16374	0.224241	0.585161	0.527327	SNX3	1
GO:0070849	response to epidermal growth factor	1/1007	4/16374	0.224241	0.585161	0.527327	TPR	1
GO:0070940	dephosphorylation of RNA polymerase II C-terminal domain	1/1007	4/16374	0.224241	0.585161	0.527327	RPRD1A	1
GO:0071672	negative regulation of smooth muscle cell chemotaxis	1/1007	4/16374	0.224241	0.585161	0.527327	SLIT2	1
GO:0071896	protein localization to adherens junction	1/1007	4/16374	0.224241	0.585161	0.527327	DLG5	1
GO:0071922	regulation of cohesin loading	1/1007	4/16374	0.224241	0.585161	0.527327	WAPL	1
GO:0072014	proximal tubule development	1/1007	4/16374	0.224241	0.585161	0.527327	DLL1	1
GO:0072033	renal vesicle formation	1/1007	4/16374	0.224241	0.585161	0.527327	CTNNB1	1
GO:0072429	response to intra-S DNA damage checkpoint signaling	1/1007	4/16374	0.224241	0.585161	0.527327	MUS81	1
GO:0090036	regulation of protein kinase C signaling	1/1007	4/16374	0.224241	0.585161	0.527327	SEZ6L	1
GO:0090063	positive regulation of microtubule nucleation	1/1007	4/16374	0.224241	0.585161	0.527327	HSPA1A	1
GO:0090400	stress-induced premature senescence	1/1007	4/16374	0.224241	0.585161	0.527327	CDKN1A	1
GO:0090403	oxidative stress-induced premature senescence	1/1007	4/16374	0.224241	0.585161	0.527327	TP53	1
GO:0090646	mitochondrial tRNA processing	1/1007	4/16374	0.224241	0.585161	0.527327	TRMT10C	1
GO:0097056	selenocysteinyl-tRNA(Sec) biosynthetic process	1/1007	4/16374	0.224241	0.585161	0.527327	SARS	1
GO:0097198	histone H3-K36 trimethylation	1/1007	4/16374	0.224241	0.585161	0.527327	IWS1	1
GO:0097252	oligodendrocyte apoptotic process	1/1007	4/16374	0.224241	0.585161	0.527327	TP53	1
GO:0097490	sympathetic neuron projection extension	1/1007	4/16374	0.224241	0.585161	0.527327	NRP2	1
GO:0097491	sympathetic neuron projection guidance	1/1007	4/16374	0.224241	0.585161	0.527327	NRP2	1
GO:0097709	connective tissue replacement	1/1007	4/16374	0.224241	0.585161	0.527327	ROCK2	1
GO:0097752	regulation of DNA stability	1/1007	4/16374	0.224241	0.585161	0.527327	RTF2	1
GO:0099041	vesicle tethering to Golgi	1/1007	4/16374	0.224241	0.585161	0.527327	TBC1D23	1
GO:0099703	induction of synaptic vesicle exocytosis by positive regulation of presynaptic cytosolic calcium ion concentration	1/1007	4/16374	0.224241	0.585161	0.527327	CACNA1D	1
GO:1900037	regulation of cellular response to hypoxia	1/1007	4/16374	0.224241	0.585161	0.527327	ROCK2	1
GO:1900076	regulation of cellular response to insulin stimulus	1/1007	4/16374	0.224241	0.585161	0.527327	ATP2B1	1
GO:1901300	positive regulation of hydrogen peroxide-mediated programmed cell death	1/1007	4/16374	0.224241	0.585161	0.527327	PAWR	1
GO:1901797	negative regulation of signal transduction by p53 class mediator	1/1007	4/16374	0.224241	0.585161	0.527327	MDM2	1
GO:1901798	positive regulation of signal transduction by p53 class mediator	1/1007	4/16374	0.224241	0.585161	0.527327	RPL23	1
GO:1901888	regulation of cell junction assembly	1/1007	4/16374	0.224241	0.585161	0.527327	RAPGEF1	1
GO:1902108	regulation of mitochondrial membrane permeability involved in apoptotic process	1/1007	4/16374	0.224241	0.585161	0.527327	TP53	1
GO:1902115	regulation of organelle assembly	1/1007	4/16374	0.224241	0.585161	0.527327	RDX	1
GO:1902219	negative regulation of intrinsic apoptotic signaling pathway in response to osmotic stress	1/1007	4/16374	0.224241	0.585161	0.527327	ARHGEF2	1
GO:1902275	regulation of chromatin organization	1/1007	4/16374	0.224241	0.585161	0.527327	HNRNPU	1
GO:1902285	semaphorin-plexin signaling pathway involved in neuron projection guidance	1/1007	4/16374	0.224241	0.585161	0.527327	NRP2	1
GO:1902842	negative regulation of netrin-activated signaling pathway	1/1007	4/16374	0.224241	0.585161	0.527327	NTN1	1
GO:1902952	positive regulation of dendritic spine maintenance	1/1007	4/16374	0.224241	0.585161	0.527327	ZNF804A	1
GO:1902969	mitotic DNA replication	1/1007	4/16374	0.224241	0.585161	0.527327	RTF2	1
GO:1903208	negative regulation of hydrogen peroxide-induced neuron death	1/1007	4/16374	0.224241	0.585161	0.527327	RACK1	1
GO:1903278	positive regulation of sodium ion export across plasma membrane	1/1007	4/16374	0.224241	0.585161	0.527327	ATP1B3	1
GO:1903347	negative regulation of bicellular tight junction assembly	1/1007	4/16374	0.224241	0.585161	0.527327	ROCK2	1
GO:1903553	positive regulation of extracellular exosome assembly	1/1007	4/16374	0.224241	0.585161	0.527327	SDCBP	1
GO:1903902	positive regulation of viral life cycle	1/1007	4/16374	0.224241	0.585161	0.527327	KPNA6	1
GO:1904030	negative regulation of cyclin-dependent protein kinase activity	1/1007	4/16374	0.224241	0.585161	0.527327	CDKN1A	1
GO:1904892	regulation of receptor signaling pathway via STAT	1/1007	4/16374	0.224241	0.585161	0.527327	NLK	1
GO:1904954	canonical Wnt signaling pathway involved in midbrain dopaminergic neuron differentiation	1/1007	4/16374	0.224241	0.585161	0.527327	CTNNB1	1
GO:1905516	positive regulation of fertilization	1/1007	4/16374	0.224241	0.585161	0.527327	LHFPL2	1
GO:1905908	positive regulation of amyloid fibril formation	1/1007	4/16374	0.224241	0.585161	0.527327	PSEN1	1
GO:1990086	lens fiber cell apoptotic process	1/1007	4/16374	0.224241	0.585161	0.527327	TGFBR2	1
GO:1990504	dense core granule exocytosis	1/1007	4/16374	0.224241	0.585161	0.527327	CADPS	1
GO:1990785	response to water-immersion restraint stress	1/1007	4/16374	0.224241	0.585161	0.527327	MDM2	1
GO:1990910	response to hypobaric hypoxia	1/1007	4/16374	0.224241	0.585161	0.527327	HSF1	1
GO:1990911	response to psychosocial stress	1/1007	4/16374	0.224241	0.585161	0.527327	HSF1	1
GO:1990966	ATP generation from poly-ADP-D-ribose	1/1007	4/16374	0.224241	0.585161	0.527327	PARG	1
GO:2000002	negative regulation of DNA damage checkpoint	1/1007	4/16374	0.224241	0.585161	0.527327	THOC1	1
GO:2000346	negative regulation of hepatocyte proliferation	1/1007	4/16374	0.224241	0.585161	0.527327	FBXW7	1
GO:2000587	negative regulation of platelet-derived growth factor receptor-beta signaling pathway	1/1007	4/16374	0.224241	0.585161	0.527327	PTPN12	1
GO:2000672	negative regulation of motor neuron apoptotic process	1/1007	4/16374	0.224241	0.585161	0.527327	MAP2K4	1
GO:2000825	positive regulation of androgen receptor activity	1/1007	4/16374	0.224241	0.585161	0.527327	TAF1	1
GO:2001013	epithelial cell proliferation involved in renal tubule morphogenesis	1/1007	4/16374	0.224241	0.585161	0.527327	MTSS1	1
GO:0030335	positive regulation of cell migration	15/1007	196/16374	0.226018	0.589413	0.531159	ACVR1/EGFR/ADAM17/TIAM1/ITGB1/IGF1R/ACTN4/ROCK2/RACK1/RRAS2/DAPK3/PDPN/RDX/SDCBP/CEMIP	15
GO:0090305	nucleic acid phosphodiester bond hydrolysis	6/1007	67/16374	0.229043	0.593013	0.534403	RBBP8/G3BP1/WRN/APTX/ZRANB3/ZC3H12C	6
GO:0050817	coagulation	11/1007	138/16374	0.229057	0.593013	0.534403	SERPINE2/DGKH/GNG2/RAF1/GNB1/DGKD/PRKCE/FLNA/PDPN/PSEN1/DGKI	11
GO:0097711	ciliary basal body-plasma membrane docking	8/1007	95/16374	0.229117	0.593013	0.534403	RAB3IP/DYNLL1/HSP90AA1/CEP192/TCTN3/CEP89/CEP290/CEP83	8
GO:0001755	neural crest cell migration	3/1007	27/16374	0.229324	0.593013	0.534403	ACVR1/CORO1C/KITLG	3
GO:0016482	cytosolic transport	3/1007	27/16374	0.229324	0.593013	0.534403	MTMR2/RDX/SNX3	3
GO:0021954	central nervous system neuron development	3/1007	27/16374	0.229324	0.593013	0.534403	HPRT1/HSP90AA1/HSP90AB1	3
GO:0030511	positive regulation of transforming growth factor beta receptor signaling pathway	3/1007	27/16374	0.229324	0.593013	0.534403	ADAM17/HSP90AB1/SDCBP	3
GO:0035116	embryonic hindlimb morphogenesis	3/1007	27/16374	0.229324	0.593013	0.534403	CHD7/AFF3/CTNNB1	3
GO:0035767	endothelial cell chemotaxis	3/1007	27/16374	0.229324	0.593013	0.534403	TMSB4X/LGMN/HSPB1	3
GO:0048384	retinoic acid receptor signaling pathway	3/1007	27/16374	0.229324	0.593013	0.534403	ACTN4/CREM/EZH2	3
GO:0050803	regulation of synapse structure or activity	3/1007	27/16374	0.229324	0.593013	0.534403	PTPRO/VCP/ETV5	3
GO:0051928	positive regulation of calcium ion transport	3/1007	27/16374	0.229324	0.593013	0.534403	WNK3/ATP2B1/CACNA1D	3
GO:2000379	positive regulation of reactive oxygen species metabolic process	3/1007	27/16374	0.229324	0.593013	0.534403	TGFBR2/CDKN1A/TP53	3
GO:0006338	chromatin remodeling	7/1007	81/16374	0.229885	0.593924	0.535225	BAZ1A/SATB2/CHD7/RBBP4/CHD1/SMARCA4/TPR	7
GO:0099504	synaptic vesicle cycle	4/1007	40/16374	0.229973	0.593924	0.535225	PCLO/SYNDIG1/CTNNB1/CADPS	4
GO:0006898	receptor-mediated endocytosis	13/1007	168/16374	0.234557	0.597992	0.53889	HSPH1/ARF1/ANXA2/LDLRAD3/TGFBR2/CTTN/HSP90AA1/MTMR2/HIP1/LDLR/GAK/SNX9/SDCBP	13
GO:0001504	neurotransmitter uptake	2/1007	15/16374	0.234685	0.597992	0.53889	SLC38A1/PSEN1	2
GO:0006895	Golgi to endosome transport	2/1007	15/16374	0.234685	0.597992	0.53889	MON2/KLHL20	2
GO:0007512	adult heart development	2/1007	15/16374	0.234685	0.597992	0.53889	MNAT1/CHD7	2
GO:0010717	regulation of epithelial to mesenchymal transition	2/1007	15/16374	0.234685	0.597992	0.53889	TIAM1/CTNNB1	2
GO:0010955	negative regulation of protein processing	2/1007	15/16374	0.234685	0.597992	0.53889	SERPINE2/MDM2	2
GO:0022602	ovulation cycle process	2/1007	15/16374	0.234685	0.597992	0.53889	NRIP1/SLIT2	2
GO:0030517	negative regulation of axon extension	2/1007	15/16374	0.234685	0.597992	0.53889	DRAXIN/NTN1	2
GO:0033146	regulation of intracellular estrogen receptor signaling pathway	2/1007	15/16374	0.234685	0.597992	0.53889	CBFB/RUNX1	2
GO:0035883	enteroendocrine cell differentiation	2/1007	15/16374	0.234685	0.597992	0.53889	CDK6/DLL1	2
GO:0035994	response to muscle stretch	2/1007	15/16374	0.234685	0.597992	0.53889	NFKBIA/RAF1	2
GO:0043254	regulation of protein-containing complex assembly	2/1007	15/16374	0.234685	0.597992	0.53889	HSP90AA1/HSPA8	2
GO:0043584	nose development	2/1007	15/16374	0.234685	0.597992	0.53889	SMCHD1/CHD7	2
GO:0045292	mRNA cis splicing, via spliceosome	2/1007	15/16374	0.234685	0.597992	0.53889	SNRNP200/PRPF40A	2
GO:0045475	locomotor rhythm	2/1007	15/16374	0.234685	0.597992	0.53889	EGR1/ZFHX3	2
GO:0045589	regulation of regulatory T cell differentiation	2/1007	15/16374	0.234685	0.597992	0.53889	CBFB/RUNX1	2
GO:0050651	dermatan sulfate proteoglycan biosynthetic process	2/1007	15/16374	0.234685	0.597992	0.53889	UST/DSEL	2
GO:0060766	negative regulation of androgen receptor signaling pathway	2/1007	15/16374	0.234685	0.597992	0.53889	SMARCA4/NCOR2	2
GO:1900153	positive regulation of nuclear-transcribed mRNA catabolic process, deadenylation-dependent decay	2/1007	15/16374	0.234685	0.597992	0.53889	DHX36/PABPC1	2
GO:1903543	positive regulation of exosomal secretion	2/1007	15/16374	0.234685	0.597992	0.53889	STAM/SDCBP	2
GO:2000737	negative regulation of stem cell differentiation	2/1007	15/16374	0.234685	0.597992	0.53889	HNRNPU/CDK13	2
GO:0043406	positive regulation of MAP kinase activity	5/1007	54/16374	0.236938	0.601268	0.541843	EGFR/NEK10/EZH2/KITLG/ROBO1	5
GO:0007565	female pregnancy	12/1007	154/16374	0.238849	0.601268	0.541843	VMP1/FKBP4/ANGPT2/HSF1/TGFBR2/ITGA3/SPP1/NAMPT/ACSL4/KPNA6/CAPN2/RPL29	12
GO:0009101	glycoprotein biosynthetic process	7/1007	82/16374	0.239144	0.601268	0.541843	PMM2/MAN2A1/GALNT17/PSEN1/EXT1/ST8SIA4/LARGE1	7
GO:0021761	limbic system development	7/1007	82/16374	0.239144	0.601268	0.541843	XRN2/TENT2/CRK/EIF2B3/EZH2/CNTNAP2/FGF13	7
GO:0035592	establishment of protein localization to extracellular region	6/1007	68/16374	0.239266	0.601268	0.541843	ARF1/PPID/EXOC1/PPIA/ADAM9/TGFB2	6
GO:0043433	negative regulation of DNA-binding transcription factor activity	6/1007	68/16374	0.239266	0.601268	0.541843	HMOX1/TAF1/FLNA/KDM1A/EZH2/TAF3	6
GO:0007219	Notch signaling pathway	13/1007	169/16374	0.240941	0.601268	0.541843	EGFR/CDK6/ADAM17/TGFBR2/NFKBIA/DLL1/YTHDF2/FBXW7/YBX1/CDH6/PSEN1/WWC1/TGFB2	13
GO:0014823	response to activity	4/1007	41/16374	0.243483	0.601268	0.541843	PRKDC/ANGPT2/HSF1/GCLM	4
GO:0032612	interleukin-1 production	4/1007	41/16374	0.243483	0.601268	0.541843	ANXA1/ABCA1/IFI16/HSPB1	4
GO:0098813	nuclear chromosome segregation	4/1007	41/16374	0.243483	0.601268	0.541843	SMC5/ZNF207/FBXW7/TENT4A	4
GO:0003180	aortic valve morphogenesis	3/1007	28/16374	0.246037	0.601268	0.541843	ROCK2/SLIT2/ROBO1	3
GO:0010575	positive regulation of vascular endothelial growth factor production	3/1007	28/16374	0.246037	0.601268	0.541843	SULF2/ATF4/EIF2AK3	3
GO:0045765	regulation of angiogenesis	3/1007	28/16374	0.246037	0.601268	0.541843	HMOX1/WARS/CTNNB1	3
GO:0048864	stem cell development	3/1007	28/16374	0.246037	0.601268	0.541843	ACVR1/CORO1C/KITLG	3
GO:0051204	protein insertion into mitochondrial membrane	3/1007	28/16374	0.246037	0.601268	0.541843	TP53/YWHAB/TFDP2	3
GO:0061028	establishment of endothelial barrier	3/1007	28/16374	0.246037	0.601268	0.541843	RAPGEF1/ROCK2/RDX	3
GO:0061621	canonical glycolysis	3/1007	28/16374	0.246037	0.601268	0.541843	FOXK2/PGM2L1/PFKP	3
GO:0071539	protein localization to centrosome	3/1007	28/16374	0.246037	0.601268	0.541843	PIBF1/CEP192/CEP83	3
GO:0072606	interleukin-8 secretion	3/1007	28/16374	0.246037	0.601268	0.541843	CHI3L1/TMSB4X/ANXA1	3
GO:0097485	neuron projection guidance	3/1007	28/16374	0.246037	0.601268	0.541843	NTN1/NRP2/SLIT2	3
GO:0060541	respiratory system development	8/1007	97/16374	0.246217	0.601268	0.541843	CHI3L1/EGFR/SMCHD1/ITGA3/CHD7/FBXW7/PDPN/HIKESHI	8
GO:0002446	neutrophil mediated immunity	34/1007	488/16374	0.247654	0.601268	0.541843	CHI3L1/CD44/HSPA6/KPNB1/ANXA2/ADAM17/EEF1A1/FTH1/FTL/DYNLL1/NFASC/PSMD1/CCT2/SRP14/HSP90AA1/PSMD12/CCT8/FAF2/VCP/RAB31/CDK13/PSMB7/PPIA/PSMD14/PRDX6/CEP290/HSP90AB1/RAB18/HSPA1A/SDCBP/PSEN1/ATP11A/HSPA8/MGST1	34
GO:0016485	protein processing	7/1007	83/16374	0.248521	0.601268	0.541843	SERPINE2/MDM2/LDLRAD3/MMP16/METAP2/XPNPEP3/PSEN1	7
GO:0006879	cellular iron ion homeostasis	5/1007	55/16374	0.248595	0.601268	0.541843	HMOX1/FTH1/FTL/SKP1/ATP6V1A	5
GO:0008637	apoptotic mitochondrial changes	5/1007	55/16374	0.248595	0.601268	0.541843	IFIT2/TP53/GCLM/PPP2CB/OPA1	5
GO:0021543	pallium development	9/1007	112/16374	0.251262	0.601268	0.541843	XRN2/TENT2/CRK/FLNA/EIF2B3/KDM1A/EZH2/CNTNAP2/FGF13	9
GO:0030155	regulation of cell adhesion	4/1007	42/16374	0.257165	0.601268	0.541843	ABL2/ROCK2/DLL1/PPP1CB	4
GO:0034198	cellular response to amino acid starvation	4/1007	42/16374	0.257165	0.601268	0.541843	LARS/CDKN1A/ATF4/EIF2AK3	4
GO:0038034	signal transduction in absence of ligand	4/1007	42/16374	0.257165	0.601268	0.541843	STRADB/DAPK3/MCL1/HSPA1A	4
GO:0007599	hemostasis	11/1007	142/16374	0.257466	0.601268	0.541843	SERPINE2/DGKH/GNG2/RAF1/GNB1/DGKD/PRKCE/FLNA/PDPN/ANXA7/DGKI	11
GO:0003222	ventricular trabecula myocardium morphogenesis	2/1007	16/16374	0.258025	0.601268	0.541843	CHD7/TGFB2	2
GO:0006636	unsaturated fatty acid biosynthetic process	2/1007	16/16374	0.258025	0.601268	0.541843	SCD5/ELOVL5	2
GO:0008340	determination of adult lifespan	2/1007	16/16374	0.258025	0.601268	0.541843	PRDM2/TP53	2
GO:0010569	regulation of double-strand break repair via homologous recombination	2/1007	16/16374	0.258025	0.601268	0.541843	ZNF365/KDM1A	2
GO:0010875	positive regulation of cholesterol efflux	2/1007	16/16374	0.258025	0.601268	0.541843	NFKBIA/ABCA1	2
GO:0016540	protein autoprocessing	2/1007	16/16374	0.258025	0.601268	0.541843	PISD/CAPN2	2
GO:0030214	hyaluronan catabolic process	2/1007	16/16374	0.258025	0.601268	0.541843	CD44/CEMIP	2
GO:0030252	growth hormone secretion	2/1007	16/16374	0.258025	0.601268	0.541843	CHD7/SERP1	2
GO:0032461	positive regulation of protein oligomerization	2/1007	16/16374	0.258025	0.601268	0.541843	TP53/SNX9	2
GO:0033631	cell-cell adhesion mediated by integrin	2/1007	16/16374	0.258025	0.601268	0.541843	ITGB1/ADAM9	2
GO:0036035	osteoclast development	2/1007	16/16374	0.258025	0.601268	0.541843	ANXA2/FBXW7	2
GO:0043122	regulation of I-kappaB kinase/NF-kappaB signaling	2/1007	16/16374	0.258025	0.601268	0.541843	ZFAND6/HSPB1	2
GO:0043586	tongue development	2/1007	16/16374	0.258025	0.601268	0.541843	EGFR/BNC2	2
GO:0043604	amide biosynthetic process	2/1007	16/16374	0.258025	0.601268	0.541843	NSMAF/RACK1	2
GO:0044849	estrous cycle	2/1007	16/16374	0.258025	0.601268	0.541843	EGR1/NCOR2	2
GO:0045047	protein targeting to ER	2/1007	16/16374	0.258025	0.601268	0.541843	SRP54/SRP14	2
GO:0045841	negative regulation of mitotic metaphase/anaphase transition	2/1007	16/16374	0.258025	0.601268	0.541843	TPR/PCID2	2
GO:0048806	genitalia development	2/1007	16/16374	0.258025	0.601268	0.541843	CHD7/CTNNB1	2
GO:0048872	homeostasis of number of cells	2/1007	16/16374	0.258025	0.601268	0.541843	RRN3/CYLD	2
GO:0055017	cardiac muscle tissue growth	2/1007	16/16374	0.258025	0.601268	0.541843	TENM4/TGFB2	2
GO:0060008	Sertoli cell differentiation	2/1007	16/16374	0.258025	0.601268	0.541843	SAFB2/FNDC3A	2
GO:0071732	cellular response to nitric oxide	2/1007	16/16374	0.258025	0.601268	0.541843	CRK/MTR	2
GO:0098698	postsynaptic specialization assembly	2/1007	16/16374	0.258025	0.601268	0.541843	GAP43/IL1RAP	2
GO:0032147	activation of protein kinase activity	5/1007	56/16374	0.260394	0.601268	0.541843	TGFBR2/STRADB/RPTOR/FGF13/TGFB2	5
GO:0098609	cell-cell adhesion	14/1007	187/16374	0.261223	0.601268	0.541843	VMP1/CD44/EGFR/NRCAM/GTPBP4/ANXA2/ANXA1/RAPGEF1/NTN1/CTNNB1/FNDC3A/RDX/DLG5/PSEN1	14
GO:0050794	regulation of cellular process	10/1007	128/16374	0.262567	0.601268	0.541843	ACVR1/RGS17/GRIP1/CRK/STAM/SOCS6/RGS6/PRR5L/UGCG/GPC6	10
GO:0001844	protein insertion into mitochondrial membrane involved in apoptotic signaling pathway	3/1007	29/16374	0.262929	0.601268	0.541843	TP53/YWHAB/TFDP2	3
GO:0010803	regulation of tumor necrosis factor-mediated signaling pathway	3/1007	29/16374	0.262929	0.601268	0.541843	RACK1/CYLD/OTULIN	3
GO:0014031	mesenchymal cell development	3/1007	29/16374	0.262929	0.601268	0.541843	ACVR1/CORO1C/KITLG	3
GO:0031047	gene silencing by RNA	3/1007	29/16374	0.262929	0.601268	0.541843	PABPC1/CNOT2/ERI1	3
GO:0045446	endothelial cell differentiation	3/1007	29/16374	0.262929	0.601268	0.541843	EDF1/CTNNB1/PDPN	3
GO:0045736	negative regulation of cyclin-dependent protein serine/threonine kinase activity	3/1007	29/16374	0.262929	0.601268	0.541843	IPO5/CDKN1A/IPO7	3
GO:0046579	positive regulation of Ras protein signal transduction	3/1007	29/16374	0.262929	0.601268	0.541843	RAPGEF1/DGKI/KITLG	3
GO:0050650	chondroitin sulfate proteoglycan biosynthetic process	3/1007	29/16374	0.262929	0.601268	0.541843	CHST15/CHST11/CHSY1	3
GO:0030168	platelet activation	11/1007	143/16374	0.264752	0.601268	0.541843	DGKH/GNG2/RAF1/GNB1/DGKD/PRKCE/FLNA/ACTG1/PDPN/HSPB1/DGKI	11
GO:0051056	regulation of small GTPase mediated signal transduction	11/1007	143/16374	0.264752	0.601268	0.541843	ARHGAP10/SIPA1L3/SIPA1L2/TIAM1/ARHGAP24/ARHGEF2/MYO9B/SRGAP1/ARHGEF7/ARHGAP21/SRGAP2	11
GO:0106106	cold-induced thermogenesis	11/1007	143/16374	0.264752	0.601268	0.541843	ADAM17/HSF1/IGF1R/NOVA1/ATF4/NRDC/ZNF516/KDM1A/LPIN1/PLCL1/PDGFC	11
GO:0007417	central nervous system development	24/1007	339/16374	0.265659	0.601268	0.541843	SPOCK1/NRCAM/SHROOM4/PRKDC/CTTNBP2/TGFBR2/RPS6KA3/SOX4/CHD7/DLL1/WWP1/ATP2B1/WRN/GRIN2B/DSCAML1/UBE3A/TBC1D23/BAG3/PCDH19/RAB18/SPATA5/ACSL3/CNTNAP2/PDGFC	24
GO:0035023	regulation of Rho protein signal transduction	7/1007	85/16374	0.267598	0.601268	0.541843	TIAM1/ARHGEF2/MYO9B/RAF1/ARHGEF7/DNMBP/FARP2	7
GO:0060348	bone development	7/1007	85/16374	0.267598	0.601268	0.541843	SULF2/ANKRD11/TMEM38B/TP53/SMAD5/CHSY1/PDGFC	7
GO:0071774	response to fibroblast growth factor	7/1007	85/16374	0.267598	0.601268	0.541843	HNRNPM/POLR2F/POLR2B/POLR2A/HNRNPF/GTF2F2/SPRED1	7
GO:0007268	chemical synaptic transmission	22/1007	309/16374	0.26814	0.601268	0.541843	GRIK2/EGFR/SERPINE2/KCNQ3/ITGB1/NOVA1/TSHZ3/GRIN2B/PRKCE/CTNNB1/CACNA1A/PCDH17/USP14/CEP89/PPFIA1/GJC1/CACNA1D/PLCL1/SDCBP/PSEN1/DGKI/HSPA8	22
GO:0007224	smoothened signaling pathway	10/1007	129/16374	0.270325	0.601268	0.541843	SERPINE2/TGFBR2/PRRX1/IFT20/POR/MOSMO/TCTN3/TROVE2/DLG5/CHSY1	10
GO:0002040	sprouting angiogenesis	6/1007	71/16374	0.270696	0.601268	0.541843	ITGB1/DLL1/ADAMTS9/OTULIN/SLIT2/ROBO1	6
GO:0031100	animal organ regeneration	4/1007	43/16374	0.270994	0.601268	0.541843	ANGPT2/TGFBR2/CDKN1A/LPIN1	4
GO:0043967	histone H4 acetylation	4/1007	43/16374	0.270994	0.601268	0.541843	NAA50/IWS1/EP400/ATG5	4
GO:0060840	artery development	4/1007	43/16374	0.270994	0.601268	0.541843	CHD7/PRRX1/ADAMTS9/LDLR	4
GO:0071364	cellular response to epidermal growth factor stimulus	4/1007	43/16374	0.270994	0.601268	0.541843	EGFR/EEF1A1/PTPN12/GAREM1	4
GO:1902653	secondary alcohol biosynthetic process	4/1007	43/16374	0.270994	0.601268	0.541843	KPNB1/POR/FDFT1/MBTPS1	4
GO:0001757	somite specification	1/1007	5/16374	0.271962	0.601268	0.541843	DLL1	1
GO:0002175	protein localization to paranode region of axon	1/1007	5/16374	0.271962	0.601268	0.541843	NFASC	1
GO:0002318	myeloid progenitor cell differentiation	1/1007	5/16374	0.271962	0.601268	0.541843	JAM3	1
GO:0003093	regulation of glomerular filtration	1/1007	5/16374	0.271962	0.601268	0.541843	PTPRO	1
GO:0003175	tricuspid valve development	1/1007	5/16374	0.271962	0.601268	0.541843	TGFBR2	1
GO:0003186	tricuspid valve morphogenesis	1/1007	5/16374	0.271962	0.601268	0.541843	TGFBR2	1
GO:0003211	cardiac ventricle formation	1/1007	5/16374	0.271962	0.601268	0.541843	SOX4	1
GO:0003266	regulation of secondary heart field cardioblast proliferation	1/1007	5/16374	0.271962	0.601268	0.541843	CTNNB1	1
GO:0006108	malate metabolic process	1/1007	5/16374	0.271962	0.601268	0.541843	ME3	1
GO:0006166	purine ribonucleoside salvage	1/1007	5/16374	0.271962	0.601268	0.541843	HPRT1	1
GO:0006398	mRNA 3'-end processing by stem-loop binding and cleavage	1/1007	5/16374	0.271962	0.601268	0.541843	SLBP	1
GO:0006531	aspartate metabolic process	1/1007	5/16374	0.271962	0.601268	0.541843	ADSS	1
GO:0006534	cysteine metabolic process	1/1007	5/16374	0.271962	0.601268	0.541843	GCLM	1
GO:0006616	SRP-dependent cotranslational protein targeting to membrane, translocation	1/1007	5/16374	0.271962	0.601268	0.541843	SRP54	1
GO:0006658	phosphatidylserine metabolic process	1/1007	5/16374	0.271962	0.601268	0.541843	SERINC5	1
GO:0006710	androgen catabolic process	1/1007	5/16374	0.271962	0.601268	0.541843	SPP1	1
GO:0006807	nitrogen compound metabolic process	1/1007	5/16374	0.271962	0.601268	0.541843	MYO1E	1
GO:0008038	neuron recognition	1/1007	5/16374	0.271962	0.601268	0.541843	CNTNAP2	1
GO:0008298	intracellular mRNA localization	1/1007	5/16374	0.271962	0.601268	0.541843	DHX36	1
GO:0009812	flavonoid metabolic process	1/1007	5/16374	0.271962	0.601268	0.541843	POR	1
GO:0010265	SCF complex assembly	1/1007	5/16374	0.271962	0.601268	0.541843	SKP1	1
GO:0010387	COP9 signalosome assembly	1/1007	5/16374	0.271962	0.601268	0.541843	COPS8	1
GO:0010606	positive regulation of cytoplasmic mRNA processing body assembly	1/1007	5/16374	0.271962	0.601268	0.541843	CNOT2	1
GO:0010632	regulation of epithelial cell migration	1/1007	5/16374	0.271962	0.601268	0.541843	CORO1C	1
GO:0010649	regulation of cell communication by electrical coupling	1/1007	5/16374	0.271962	0.601268	0.541843	CAMK2D	1
GO:0010656	negative regulation of muscle cell apoptotic process	1/1007	5/16374	0.271962	0.601268	0.541843	HMOX1	1
GO:0010715	regulation of extracellular matrix disassembly	1/1007	5/16374	0.271962	0.601268	0.541843	DDR2	1
GO:0010750	positive regulation of nitric oxide mediated signal transduction	1/1007	5/16374	0.271962	0.601268	0.541843	EGFR	1
GO:0010936	negative regulation of macrophage cytokine production	1/1007	5/16374	0.271962	0.601268	0.541843	TGFB2	1
GO:0014042	positive regulation of neuron maturation	1/1007	5/16374	0.271962	0.601268	0.541843	OPA1	1
GO:0014074	response to purine-containing compound	1/1007	5/16374	0.271962	0.601268	0.541843	ADSS	1
GO:0015014	heparan sulfate proteoglycan biosynthetic process, polysaccharide chain biosynthetic process	1/1007	5/16374	0.271962	0.601268	0.541843	EXT1	1
GO:0016191	synaptic vesicle uncoating	1/1007	5/16374	0.271962	0.601268	0.541843	GAK	1
GO:0016576	histone dephosphorylation	1/1007	5/16374	0.271962	0.601268	0.541843	EYA3	1
GO:0021514	ventral spinal cord interneuron differentiation	1/1007	5/16374	0.271962	0.601268	0.541843	LMO4	1
GO:0021563	glossopharyngeal nerve development	1/1007	5/16374	0.271962	0.601268	0.541843	NAV2	1
GO:0021692	cerebellar Purkinje cell layer morphogenesis	1/1007	5/16374	0.271962	0.601268	0.541843	DLL1	1
GO:0021697	cerebellar cortex formation	1/1007	5/16374	0.271962	0.601268	0.541843	DLL1	1
GO:0021781	glial cell fate commitment	1/1007	5/16374	0.271962	0.601268	0.541843	CTNNB1	1
GO:0030050	vesicle transport along actin filament	1/1007	5/16374	0.271962	0.601268	0.541843	ACTN4	1
GO:0030859	polarized epithelial cell differentiation	1/1007	5/16374	0.271962	0.601268	0.541843	DLG5	1
GO:0032020	ISG15-protein conjugation	1/1007	5/16374	0.271962	0.601268	0.541843	UBE2E2	1
GO:0032392	DNA geometric change	1/1007	5/16374	0.271962	0.601268	0.541843	MTERF1	1
GO:0032414	positive regulation of ion transmembrane transporter activity	1/1007	5/16374	0.271962	0.601268	0.541843	WNK3	1
GO:0033153	T cell receptor V(D)J recombination	1/1007	5/16374	0.271962	0.601268	0.541843	PRKDC	1
GO:0033564	anterior/posterior axon guidance	1/1007	5/16374	0.271962	0.601268	0.541843	NTN1	1
GO:0034086	maintenance of sister chromatid cohesion	1/1007	5/16374	0.271962	0.601268	0.541843	SMC5	1
GO:0034103	regulation of tissue remodeling	1/1007	5/16374	0.271962	0.601268	0.541843	TP53	1
GO:0034184	positive regulation of maintenance of mitotic sister chromatid cohesion	1/1007	5/16374	0.271962	0.601268	0.541843	SMC5	1
GO:0034241	positive regulation of macrophage fusion	1/1007	5/16374	0.271962	0.601268	0.541843	ADAM9	1
GO:0034721	histone H3-K4 demethylation, trimethyl-H3-K4-specific	1/1007	5/16374	0.271962	0.601268	0.541843	KDM5A	1
GO:0034982	mitochondrial protein processing	1/1007	5/16374	0.271962	0.601268	0.541843	YME1L1	1
GO:0035308	negative regulation of protein dephosphorylation	1/1007	5/16374	0.271962	0.601268	0.541843	YWHAB	1
GO:0035336	long-chain fatty-acyl-CoA metabolic process	1/1007	5/16374	0.271962	0.601268	0.541843	FAR2	1
GO:0035509	negative regulation of myosin-light-chain-phosphatase activity	1/1007	5/16374	0.271962	0.601268	0.541843	ROCK2	1
GO:0035617	stress granule disassembly	1/1007	5/16374	0.271962	0.601268	0.541843	VCP	1
GO:0035624	receptor transactivation	1/1007	5/16374	0.271962	0.601268	0.541843	ADAM17	1
GO:0035694	mitochondrial protein catabolic process	1/1007	5/16374	0.271962	0.601268	0.541843	YME1L1	1
GO:0036091	positive regulation of transcription from RNA polymerase II promoter in response to oxidative stress	1/1007	5/16374	0.271962	0.601268	0.541843	ATF4	1
GO:0036491	regulation of translation initiation in response to endoplasmic reticulum stress	1/1007	5/16374	0.271962	0.601268	0.541843	EIF2AK3	1
GO:0038027	apolipoprotein A-I-mediated signaling pathway	1/1007	5/16374	0.271962	0.601268	0.541843	ABCA1	1
GO:0038033	positive regulation of endothelial cell chemotaxis by VEGF-activated vascular endothelial growth factor receptor signaling pathway	1/1007	5/16374	0.271962	0.601268	0.541843	HSPB1	1
GO:0042222	interleukin-1 biosynthetic process	1/1007	5/16374	0.271962	0.601268	0.541843	EGR1	1
GO:0042640	anagen	1/1007	5/16374	0.271962	0.601268	0.541843	CTNNB1	1
GO:0042796	snRNA transcription by RNA polymerase III	1/1007	5/16374	0.271962	0.601268	0.541843	ICE1	1
GO:0042985	negative regulation of amyloid precursor protein biosynthetic process	1/1007	5/16374	0.271962	0.601268	0.541843	BACE2	1
GO:0042989	sequestering of actin monomers	1/1007	5/16374	0.271962	0.601268	0.541843	TMSB4X	1
GO:0043243	positive regulation of protein-containing complex disassembly	1/1007	5/16374	0.271962	0.601268	0.541843	IGF1R	1
GO:0043247	telomere maintenance in response to DNA damage	1/1007	5/16374	0.271962	0.601268	0.541843	RIF1	1
GO:0043697	cell dedifferentiation	1/1007	5/16374	0.271962	0.601268	0.541843	CDK6	1
GO:0045058	T cell selection	1/1007	5/16374	0.271962	0.601268	0.541843	CYLD	1
GO:0045112	integrin biosynthetic process	1/1007	5/16374	0.271962	0.601268	0.541843	TGFB2	1
GO:0045345	positive regulation of MHC class I biosynthetic process	1/1007	5/16374	0.271962	0.601268	0.541843	HSPH1	1
GO:0045347	negative regulation of MHC class II biosynthetic process	1/1007	5/16374	0.271962	0.601268	0.541843	NFX1	1
GO:0045843	negative regulation of striated muscle tissue development	1/1007	5/16374	0.271962	0.601268	0.541843	LUC7L	1
GO:0045899	positive regulation of RNA polymerase II transcription preinitiation complex assembly	1/1007	5/16374	0.271962	0.601268	0.541843	TP53	1
GO:0045920	negative regulation of exocytosis	1/1007	5/16374	0.271962	0.601268	0.541843	ANXA1	1
GO:0046069	cGMP catabolic process	1/1007	5/16374	0.271962	0.601268	0.541843	PDE10A	1
GO:0048170	positive regulation of long-term neuronal synaptic plasticity	1/1007	5/16374	0.271962	0.601268	0.541843	EPHB2	1
GO:0048311	mitochondrion distribution	1/1007	5/16374	0.271962	0.601268	0.541843	MEF2A	1
GO:0048318	axial mesoderm development	1/1007	5/16374	0.271962	0.601268	0.541843	RPL38	1
GO:0048505	regulation of timing of cell differentiation	1/1007	5/16374	0.271962	0.601268	0.541843	SERPINE2	1
GO:0048639	positive regulation of developmental growth	1/1007	5/16374	0.271962	0.601268	0.541843	PRKDC	1
GO:0050725	positive regulation of interleukin-1 beta biosynthetic process	1/1007	5/16374	0.271962	0.601268	0.541843	EGR1	1
GO:0050789	regulation of biological process	1/1007	5/16374	0.271962	0.601268	0.541843	LDLR	1
GO:0050878	regulation of body fluid levels	1/1007	5/16374	0.271962	0.601268	0.541843	EPHB2	1
GO:0051135	positive regulation of NK T cell activation	1/1007	5/16374	0.271962	0.601268	0.541843	HSPH1	1
GO:0051179	localization	1/1007	5/16374	0.271962	0.601268	0.541843	CAMK2D	1
GO:0051205	protein insertion into membrane	1/1007	5/16374	0.271962	0.601268	0.541843	EGFR	1
GO:0051343	positive regulation of cyclic-nucleotide phosphodiesterase activity	1/1007	5/16374	0.271962	0.601268	0.541843	RACK1	1
GO:0051345	positive regulation of hydrolase activity	1/1007	5/16374	0.271962	0.601268	0.541843	WRN	1
GO:0051495	positive regulation of cytoskeleton organization	1/1007	5/16374	0.271962	0.601268	0.541843	PFDN2	1
GO:0051572	negative regulation of histone H3-K4 methylation	1/1007	5/16374	0.271962	0.601268	0.541843	KDM1A	1
GO:0051702	interaction with symbiont	1/1007	5/16374	0.271962	0.601268	0.541843	HSPD1	1
GO:0051900	regulation of mitochondrial depolarization	1/1007	5/16374	0.271962	0.601268	0.541843	GCLM	1
GO:0051984	positive regulation of chromosome segregation	1/1007	5/16374	0.271962	0.601268	0.541843	SMC5	1
GO:0060266	negative regulation of respiratory burst involved in inflammatory response	1/1007	5/16374	0.271962	0.601268	0.541843	RPS19	1
GO:0060718	chorionic trophoblast cell differentiation	1/1007	5/16374	0.271962	0.601268	0.541843	MAP3K4	1
GO:0060736	prostate gland growth	1/1007	5/16374	0.271962	0.601268	0.541843	UBE3A	1
GO:0060742	epithelial cell differentiation involved in prostate gland development	1/1007	5/16374	0.271962	0.601268	0.541843	CTNNB1	1
GO:0060762	regulation of branching involved in mammary gland duct morphogenesis	1/1007	5/16374	0.271962	0.601268	0.541843	ETV5	1
GO:0060789	hair follicle placode formation	1/1007	5/16374	0.271962	0.601268	0.541843	CTNNB1	1
GO:0060916	mesenchymal cell proliferation involved in lung development	1/1007	5/16374	0.271962	0.601268	0.541843	CTNNB1	1
GO:0060923	cardiac muscle cell fate commitment	1/1007	5/16374	0.271962	0.601268	0.541843	ACVR1	1
GO:0061026	cardiac muscle tissue regeneration	1/1007	5/16374	0.271962	0.601268	0.541843	CDKN1A	1
GO:0061197	fungiform papilla morphogenesis	1/1007	5/16374	0.271962	0.601268	0.541843	CTNNB1	1
GO:0061326	renal tubule development	1/1007	5/16374	0.271962	0.601268	0.541843	MTSS1	1
GO:0061484	hematopoietic stem cell homeostasis	1/1007	5/16374	0.271962	0.601268	0.541843	ADAR	1
GO:0061551	trigeminal ganglion development	1/1007	5/16374	0.271962	0.601268	0.541843	NRP2	1
GO:0061668	mitochondrial ribosome assembly	1/1007	5/16374	0.271962	0.601268	0.541843	FASTKD2	1
GO:0070169	positive regulation of biomineral tissue development	1/1007	5/16374	0.271962	0.601268	0.541843	ATF4	1
GO:0070245	positive regulation of thymocyte apoptotic process	1/1007	5/16374	0.271962	0.601268	0.541843	TP53	1
GO:0070487	monocyte aggregation	1/1007	5/16374	0.271962	0.601268	0.541843	CD44	1
GO:0070535	histone H2A K63-linked ubiquitination	1/1007	5/16374	0.271962	0.601268	0.541843	RNF168	1
GO:0070901	mitochondrial tRNA methylation	1/1007	5/16374	0.271962	0.601268	0.541843	TRMT10C	1
GO:0071359	cellular response to dsRNA	1/1007	5/16374	0.271962	0.601268	0.541843	NPM1	1
GO:0071557	histone H3-K27 demethylation	1/1007	5/16374	0.271962	0.601268	0.541843	KDM7A	1
GO:0071681	cellular response to indole-3-methanol	1/1007	5/16374	0.271962	0.601268	0.541843	CTNNB1	1
GO:0072126	positive regulation of glomerular mesangial cell proliferation	1/1007	5/16374	0.271962	0.601268	0.541843	IL6R	1
GO:0072203	cell proliferation involved in metanephros development	1/1007	5/16374	0.271962	0.601268	0.541843	EGR1	1
GO:0072602	interleukin-4 secretion	1/1007	5/16374	0.271962	0.601268	0.541843	IL1RAP	1
GO:0072683	T cell extravasation	1/1007	5/16374	0.271962	0.601268	0.541843	CRK	1
GO:0072719	cellular response to cisplatin	1/1007	5/16374	0.271962	0.601268	0.541843	HMOX1	1
GO:0075044	positive regulation by symbiont of host autophagy	1/1007	5/16374	0.271962	0.601268	0.541843	ATG5	1
GO:0086046	membrane depolarization during SA node cell action potential	1/1007	5/16374	0.271962	0.601268	0.541843	CACNA1D	1
GO:0089718	amino acid import across plasma membrane	1/1007	5/16374	0.271962	0.601268	0.541843	PSEN1	1
GO:0090148	membrane fission	1/1007	5/16374	0.271962	0.601268	0.541843	CORO1C	1
GO:0090188	negative regulation of pancreatic juice secretion	1/1007	5/16374	0.271962	0.601268	0.541843	WNK3	1
GO:0090271	positive regulation of fibroblast growth factor production	1/1007	5/16374	0.271962	0.601268	0.541843	ROCK2	1
GO:0090594	inflammatory response to wounding	1/1007	5/16374	0.271962	0.601268	0.541843	HMOX1	1
GO:0097340	inhibition of cysteine-type endopeptidase activity	1/1007	5/16374	0.271962	0.601268	0.541843	CAST	1
GO:0097350	neutrophil clearance	1/1007	5/16374	0.271962	0.601268	0.541843	ANXA1	1
GO:0097368	establishment of Sertoli cell barrier	1/1007	5/16374	0.271962	0.601268	0.541843	FLNA	1
GO:0098779	positive regulation of mitophagy in response to mitochondrial depolarization	1/1007	5/16374	0.271962	0.601268	0.541843	TOMM7	1
GO:0099532	synaptic vesicle endosomal processing	1/1007	5/16374	0.271962	0.601268	0.541843	EEA1	1
GO:1900407	regulation of cellular response to oxidative stress	1/1007	5/16374	0.271962	0.601268	0.541843	MAPKAP1	1
GO:1900452	regulation of long-term synaptic depression	1/1007	5/16374	0.271962	0.601268	0.541843	DGKI	1
GO:1901843	positive regulation of high voltage-gated calcium channel activity	1/1007	5/16374	0.271962	0.601268	0.541843	FGF14	1
GO:1902035	positive regulation of hematopoietic stem cell proliferation	1/1007	5/16374	0.271962	0.601268	0.541843	KITLG	1
GO:1902512	positive regulation of apoptotic DNA fragmentation	1/1007	5/16374	0.271962	0.601268	0.541843	HSF1	1
GO:1902527	positive regulation of protein monoubiquitination	1/1007	5/16374	0.271962	0.601268	0.541843	UBB	1
GO:1903215	negative regulation of protein targeting to mitochondrion	1/1007	5/16374	0.271962	0.601268	0.541843	BAG3	1
GO:1903401	L-lysine transmembrane transport	1/1007	5/16374	0.271962	0.601268	0.541843	SLC7A1	1
GO:1903867	extraembryonic membrane development	1/1007	5/16374	0.271962	0.601268	0.541843	MAP3K4	1
GO:1903936	cellular response to sodium arsenite	1/1007	5/16374	0.271962	0.601268	0.541843	HSF1	1
GO:1904354	negative regulation of telomere capping	1/1007	5/16374	0.271962	0.601268	0.541843	SMG6	1
GO:1904504	positive regulation of lipophagy	1/1007	5/16374	0.271962	0.601268	0.541843	SPTLC1	1
GO:1904714	regulation of chaperone-mediated autophagy	1/1007	5/16374	0.271962	0.601268	0.541843	EEF1A1	1
GO:1905050	positive regulation of metallopeptidase activity	1/1007	5/16374	0.271962	0.601268	0.541843	ANTXR1	1
GO:1905064	negative regulation of vascular smooth muscle cell differentiation	1/1007	5/16374	0.271962	0.601268	0.541843	NFATC3	1
GO:1905232	cellular response to L-glutamate	1/1007	5/16374	0.271962	0.601268	0.541843	OPA1	1
GO:1905451	positive regulation of Fc-gamma receptor signaling pathway involved in phagocytosis	1/1007	5/16374	0.271962	0.601268	0.541843	RAPGEF1	1
GO:2000391	positive regulation of neutrophil extravasation	1/1007	5/16374	0.271962	0.601268	0.541843	IL1R1	1
GO:2000405	negative regulation of T cell migration	1/1007	5/16374	0.271962	0.601268	0.541843	LRCH1	1
GO:2000556	positive regulation of T-helper 1 cell cytokine production	1/1007	5/16374	0.271962	0.601268	0.541843	IL1R1	1
GO:2000563	positive regulation of CD4-positive, alpha-beta T cell proliferation	1/1007	5/16374	0.271962	0.601268	0.541843	TGFBR2	1
GO:2000660	negative regulation of interleukin-1-mediated signaling pathway	1/1007	5/16374	0.271962	0.601268	0.541843	OTUD4	1
GO:2000736	regulation of stem cell differentiation	1/1007	5/16374	0.271962	0.601268	0.541843	OCIAD1	1
GO:2001014	regulation of skeletal muscle cell differentiation	1/1007	5/16374	0.271962	0.601268	0.541843	DDX5	1
GO:2001205	negative regulation of osteoclast development	1/1007	5/16374	0.271962	0.601268	0.541843	FBXW7	1
GO:0031016	pancreas development	5/1007	57/16374	0.272321	0.601268	0.541843	ILDR2/SOX4/CTNNB1/EIF2AK3/IL6R	5
GO:0048593	camera-type eye morphogenesis	5/1007	57/16374	0.272321	0.601268	0.541843	MAN2A1/DLL1/CTNNB1/NECTIN3/EPHB2	5
GO:0051592	response to calcium ion	5/1007	57/16374	0.272321	0.601268	0.541843	EGFR/SEC31A/MNAT1/ACTG1/ADAM9	5
GO:0034613	cellular protein localization	17/1007	234/16374	0.27295	0.602326	0.542796	EGFR/SYNDIG1/CTTN/ARHGEF2/ARFGAP3/SNX1/SEC23IP/HSP90AA1/SYTL2/NPM1/CTNNB1/CYLD/STAM/KDM1A/HSP90AB1/SNX9/STX18	17
GO:0120031	plasma membrane bounded cell projection assembly	20/1007	280/16374	0.275636	0.607918	0.547835	GAP43/RAB3IP/CDKL1/BIN3/DYNLL1/ATG5/HSP90AA1/IFT20/CORO1C/CEP192/CYLD/TCTN3/CEP89/RDX/SRGAP2C/ARPC2/CEP290/SLIT2/CEP83/VDAC3	20
GO:0007507	heart development	19/1007	265/16374	0.276776	0.608871	0.548694	HECTD1/PRKDC/MEF2A/TGFBR2/CDKL1/ITGA3/SOX4/MBD2/CHD7/CDKN1A/RAF1/DCTN5/MDM4/ADAMTS6/CTNNB1/RB1CC1/GJC1/TFDP2/TGFB2	19
GO:0009100	glycoprotein metabolic process	7/1007	86/16374	0.277283	0.608871	0.548694	PMM2/MAN2A1/GALNT17/PSEN1/EXT1/ST8SIA4/LARGE1	7
GO:0019216	regulation of lipid metabolic process	7/1007	86/16374	0.277283	0.608871	0.548694	TGS1/EDF1/NCOR2/FDFT1/ABCA1/PLIN2/TXNRD1	7
GO:0070125	mitochondrial translational elongation	7/1007	86/16374	0.277283	0.608871	0.548694	MRPL18/MRPL50/MRPL3/PTCD3/MRPL21/DAP3/MRPL33	7
GO:0001569	branching involved in blood vessel morphogenesis	3/1007	30/16374	0.279959	0.608871	0.548694	ACVR1/TGFBR2/CTNNB1	3
GO:0007094	mitotic spindle assembly checkpoint	3/1007	30/16374	0.279959	0.608871	0.548694	ZNF207/TPR/PCID2	3
GO:0010862	positive regulation of pathway-restricted SMAD protein phosphorylation	3/1007	30/16374	0.279959	0.608871	0.548694	ACVR1/SDCBP/ACVR2A	3
GO:0043278	response to morphine	3/1007	30/16374	0.279959	0.608871	0.548694	MDM2/PRKCE/PPP2R2A	3
GO:0071108	protein K48-linked deubiquitination	3/1007	30/16374	0.279959	0.608871	0.548694	OTUD4/CYLD/USP9X	3
GO:0071353	cellular response to interleukin-4	3/1007	30/16374	0.279959	0.608871	0.548694	RPL3/RPS2/HSP90AB1	3
GO:1904837	beta-catenin-TCF complex assembly	3/1007	30/16374	0.279959	0.608871	0.548694	RBBP5/SMARCA4/CTNNB1	3
GO:0030518	intracellular steroid hormone receptor signaling pathway	6/1007	72/16374	0.281392	0.608871	0.548694	CBFB/DDX5/SMARCA4/NCOR2/RUNX1/CNOT2	6
GO:0034340	response to type I interferon	6/1007	72/16374	0.281392	0.608871	0.548694	EGR1/TRIM56/GBP2/IFIT2/IFIT3/ADAR	6
GO:0072089	stem cell proliferation	6/1007	72/16374	0.281392	0.608871	0.548694	HNRNPU/HMGA2/TP53/CTNNB1/KDM1A/KITLG	6
GO:0000737	DNA catabolic process, endonucleolytic	2/1007	17/16374	0.281392	0.608871	0.548694	HSF1/MUS81	2
GO:0002026	regulation of the force of heart contraction	2/1007	17/16374	0.281392	0.608871	0.548694	CAMK2D/GLRX3	2
GO:0003215	cardiac right ventricle morphogenesis	2/1007	17/16374	0.281392	0.608871	0.548694	SOX4/TGFB2	2
GO:0003309	type B pancreatic cell differentiation	2/1007	17/16374	0.281392	0.608871	0.548694	CDK6/DLL1	2
GO:0006921	cellular component disassembly involved in execution phase of apoptosis	2/1007	17/16374	0.281392	0.608871	0.548694	KPNB1/KPNA1	2
GO:0008347	glial cell migration	2/1007	17/16374	0.281392	0.608871	0.548694	MATN2/TGFB2	2
GO:0010880	regulation of release of sequestered calcium ion into cytosol by sarcoplasmic reticulum	2/1007	17/16374	0.281392	0.608871	0.548694	CAMK2D/CHD7	2
GO:0032367	intracellular cholesterol transport	2/1007	17/16374	0.281392	0.608871	0.548694	LDLR/ABCA1	2
GO:0035162	embryonic hemopoiesis	2/1007	17/16374	0.281392	0.608871	0.548694	TGFBR2/KITLG	2
GO:0035729	cellular response to hepatocyte growth factor stimulus	2/1007	17/16374	0.281392	0.608871	0.548694	GCLM/LGMN	2
GO:0036475	neuron death in response to oxidative stress	2/1007	17/16374	0.281392	0.608871	0.548694	ATF4/CTNNB1	2
GO:0046457	prostanoid biosynthetic process	2/1007	17/16374	0.281392	0.608871	0.548694	PTGES3/PIBF1	2
GO:0051443	positive regulation of ubiquitin-protein transferase activity	2/1007	17/16374	0.281392	0.608871	0.548694	RPS2/FBXW7	2
GO:0051966	regulation of synaptic transmission, glutamatergic	2/1007	17/16374	0.281392	0.608871	0.548694	SERPINE2/PSEN1	2
GO:0055001	muscle cell development	2/1007	17/16374	0.281392	0.608871	0.548694	MYOF/KDM1A	2
GO:0060080	inhibitory postsynaptic potential	2/1007	17/16374	0.281392	0.608871	0.548694	GRIK2/IGSF9B	2
GO:0060216	definitive hemopoiesis	2/1007	17/16374	0.281392	0.608871	0.548694	CBFB/ADAR	2
GO:0071168	protein localization to chromatin	2/1007	17/16374	0.281392	0.608871	0.548694	WAPL/EZH2	2
GO:0090303	positive regulation of wound healing	2/1007	17/16374	0.281392	0.608871	0.548694	ANXA1/PRKCE	2
GO:1904355	positive regulation of telomere capping	2/1007	17/16374	0.281392	0.608871	0.548694	TNKS/MAP3K4	2
GO:2000042	negative regulation of double-strand break repair via homologous recombination	2/1007	17/16374	0.281392	0.608871	0.548694	SMCHD1/RIF1	2
GO:0021549	cerebellum development	5/1007	58/16374	0.28436	0.614296	0.553583	TP53/CRK/EZH2/PSEN1/MYO16	5
GO:0030520	intracellular estrogen receptor signaling pathway	5/1007	58/16374	0.28436	0.614296	0.553583	CBFB/DDX5/TAF7/RUNX1/CNOT2	5
GO:0061053	somite development	5/1007	58/16374	0.28436	0.614296	0.553583	PRKDC/DLL1/TP53/PPP2R3A/PSEN1	5
GO:0070997	neuron death	21/1007	297/16374	0.284772	0.614572	0.553832	GRIK2/DRAXIN/HMOX1/EGR1/HSF1/AMBRA1/TP53/RRAS2/ATF4/UBB/GCLM/LGMN/GRIN2B/NAMPT/CTNNB1/MAP2K4/CAPN2/HSP90AB1/PSEN1/PAK3/TGFB2	21
GO:0032608	interferon-beta production	4/1007	44/16374	0.284948	0.614572	0.553832	TRIM56/RNF216/TRAF3/POLR3A	4
GO:0032755	positive regulation of interleukin-6 production	4/1007	44/16374	0.284948	0.614572	0.553832	ARHGEF2/HSPD1/TBC1D23/IL6R	4
GO:0030198	extracellular matrix organization	16/1007	221/16374	0.285555	0.615549	0.554712	CD44/FBN2/ADAM12/ITGB1/TMEM38B/ITGA3/JAM3/SPP1/DNAJB6/ADAMTS9/ANTXR1/PDPN/AEBP1/LAMC1/ITGA9/DDR2	16
GO:0030323	respiratory tube development	7/1007	87/16374	0.287054	0.618449	0.557325	CHI3L1/EGFR/TGFBR2/ITGA3/FBXW7/PDPN/HIKESHI	7
GO:0031214	biomineral tissue development	8/1007	102/16374	0.290614	0.620788	0.559434	ACVR1/FBN2/ROCK2/ATF4/ATP2B1/SPP1/ACVR2A/DDR2	8
GO:0048869	cellular developmental process	16/1007	222/16374	0.291636	0.620788	0.559434	GAP43/CDK6/CBFB/ITGB1/RPS6KA3/RAF1/DLL1/TP53/DSCAML1/MCL1/CTNNB1/LMO4/ARIH2/HSP90AB1/GJC1/PSEN1	16
GO:0061448	connective tissue development	6/1007	73/16374	0.29218	0.620788	0.559434	CHI3L1/CD44/SULF2/SATB2/PRRX1/SMAD5	6
GO:0043312	neutrophil degranulation	33/1007	484/16374	0.293175	0.620788	0.559434	CHI3L1/CD44/HSPA6/KPNB1/ANXA2/EEF1A1/FTH1/FTL/DYNLL1/NFASC/PSMD1/CCT2/SRP14/HSP90AA1/PSMD12/CCT8/FAF2/VCP/RAB31/CDK13/PSMB7/PPIA/PSMD14/PRDX6/CEP290/HSP90AB1/RAB18/HSPA1A/SDCBP/PSEN1/ATP11A/HSPA8/MGST1	33
GO:0043542	endothelial cell migration	11/1007	147/16374	0.294534	0.620788	0.559434	ANGPT2/ADAM17/TMSB4X/AMOTL1/ROCK2/LGMN/ADAMTS9/NRP2/DNAJA4/SLIT2/HSPB1	11
GO:0033627	cell adhesion mediated by integrin	5/1007	59/16374	0.296496	0.620788	0.559434	ADAM17/ITGB1/CRK/ADAM9/TGFB2	5
GO:0050680	negative regulation of epithelial cell proliferation	5/1007	59/16374	0.296496	0.620788	0.559434	CDK6/MCC/STRAP/MTSS1/TGFB2	5
GO:1901224	positive regulation of NIK/NF-kappaB signaling	5/1007	59/16374	0.296496	0.620788	0.559434	EGFR/TRIM44/ACTN4/RPS3/LIMS1	5
GO:0007059	chromosome segregation	7/1007	88/16374	0.296905	0.620788	0.559434	UBE2I/SMC5/ZNF207/PUM2/PUM1/RPS3/USP9X	7
GO:0070126	mitochondrial translational termination	7/1007	88/16374	0.296905	0.620788	0.559434	MRPL18/MRPL50/MRPL3/PTCD3/MRPL21/DAP3/MRPL33	7
GO:0007093	mitotic cell cycle checkpoint	3/1007	31/16374	0.297084	0.620788	0.559434	MAP3K20/RPS6/RPL24	3
GO:0007528	neuromuscular junction development	3/1007	31/16374	0.297084	0.620788	0.559434	RER1/NRDC/ETV5	3
GO:0038128	ERBB2 signaling pathway	3/1007	31/16374	0.297084	0.620788	0.559434	EGFR/HSP90AA1/PTPN12	3
GO:2001240	negative regulation of extrinsic apoptotic signaling pathway in absence of ligand	3/1007	31/16374	0.297084	0.620788	0.559434	STRADB/MCL1/HSPA1A	3
GO:0021782	glial cell development	4/1007	45/16374	0.299003	0.620788	0.559434	BACE2/EGFR/SOX4/PSEN1	4
GO:0042220	response to cocaine	4/1007	45/16374	0.299003	0.620788	0.559434	MDM2/TIAM1/UBE3A/HSP90AB1	4
GO:0001738	morphogenesis of a polarized epithelium	2/1007	18/16374	0.304693	0.620788	0.559434	IFT20/DLG5	2
GO:0006826	iron ion transport	2/1007	18/16374	0.304693	0.620788	0.559434	FTH1/FTL	2
GO:0010824	regulation of centrosome duplication	2/1007	18/16374	0.304693	0.620788	0.559434	CHORDC1/XPO1	2
GO:0021544	subpallium development	2/1007	18/16374	0.304693	0.620788	0.559434	HPRT1/CNTNAP2	2
GO:0021988	olfactory lobe development	2/1007	18/16374	0.304693	0.620788	0.559434	CHD7/EXT1	2
GO:0031333	negative regulation of protein-containing complex assembly	2/1007	18/16374	0.304693	0.620788	0.559434	RAF1/LMO4	2
GO:0038083	peptidyl-tyrosine autophosphorylation	2/1007	18/16374	0.304693	0.620788	0.559434	EGFR/IGF1R	2
GO:0042789	mRNA transcription by RNA polymerase II	2/1007	18/16374	0.304693	0.620788	0.559434	ATF4/FLNA	2
GO:0043011	myeloid dendritic cell differentiation	2/1007	18/16374	0.304693	0.620788	0.559434	TGFBR2/PSEN1	2
GO:0043153	entrainment of circadian clock by photoperiod	2/1007	18/16374	0.304693	0.620788	0.559434	TP53/PPP1CB	2
GO:0046463	acylglycerol biosynthetic process	2/1007	18/16374	0.304693	0.620788	0.559434	FBXW7/LDLR	2
GO:0051767	nitric-oxide synthase biosynthetic process	2/1007	18/16374	0.304693	0.620788	0.559434	NAMPT/MAP2K4	2
GO:0071800	podosome assembly	2/1007	18/16374	0.304693	0.620788	0.559434	ARHGEF2/FARP2	2
GO:0072574	hepatocyte proliferation	2/1007	18/16374	0.304693	0.620788	0.559434	SULF2/FBXW7	2
GO:0090174	organelle membrane fusion	2/1007	18/16374	0.304693	0.620788	0.559434	ANXA2/ANXA1	2
GO:1901214	regulation of neuron death	2/1007	18/16374	0.304693	0.620788	0.559434	RRAS2/UBB	2
GO:1903514	release of sequestered calcium ion into cytosol by endoplasmic reticulum	2/1007	18/16374	0.304693	0.620788	0.559434	CAMK2D/CHD7	2
GO:2000114	regulation of establishment of cell polarity	2/1007	18/16374	0.304693	0.620788	0.559434	ROCK2/RACK1	2
GO:0001525	angiogenesis	29/1007	425/16374	0.306806	0.620788	0.559434	CHI3L1/ACVR1/NRCAM/NAA15/HMOX1/FMNL3/ANGPT2/ANXA2/ADAM12/ITGB1/HMGA2/ARHGAP24/TGFBR2/JAM3/ROCK2/DLL1/ADAMTS9/RUNX1/WARS/CTNNB1/NRP2/SARS/EIF2AK3/SLIT2/HSPB1/EPHB2/ROBO1/TGFB2/SPRED1	29
GO:0044782	cilium organization	14/1007	194/16374	0.30682	0.620788	0.559434	RAB3IP/CDKL1/TTC17/DYNLL1/ATG5/HSP90AA1/IFT20/CEP192/CYLD/TCTN3/CEP89/CEP290/CEP83/VDAC3	14
GO:0051607	defense response to virus	14/1007	194/16374	0.30682	0.620788	0.559434	DHX36/DDX21/ABCE1/TRIM56/G3BP1/SERINC5/LYST/ADAR/EXOC1/PCBP2/FLNA/TRAF3/IFI16/POLR3A	14
GO:0030326	embryonic limb morphogenesis	7/1007	89/16374	0.306828	0.620788	0.559434	CHST11/FBN2/MAP3K20/PRRX1/CTNNB1/PSEN1/TGFB2	7
GO:0060337	type I interferon signaling pathway	7/1007	89/16374	0.306828	0.620788	0.559434	ABCE1/EGR1/GBP2/IFIT2/IFIT3/ADAR/HSP90AB1	7
GO:0008219	cell death	18/1007	256/16374	0.312232	0.620788	0.559434	CRYAB/EMP1/HMOX1/EGR1/HSF1/CACYBP/SOX4/CDKN1A/MAP3K20/ATG5/RRAS2/UBB/GRIN2B/CACNA1A/CAPN2/HSPA1A/TMEM123/TGFB2	18
GO:0016126	sterol biosynthetic process	4/1007	46/16374	0.313136	0.620788	0.559434	KPNB1/POR/FDFT1/MBTPS1	4
GO:0022405	hair cycle process	4/1007	46/16374	0.313136	0.620788	0.559434	NSUN2/CTNNB1/FARP2/TGFB2	4
GO:0032880	regulation of protein localization	4/1007	46/16374	0.313136	0.620788	0.559434	RACK1/DNAJB6/FBXW7/TPR	4
GO:0071902	positive regulation of protein serine/threonine kinase activity	4/1007	46/16374	0.313136	0.620788	0.559434	HMGA2/RPTOR/EZH2/HSP90AB1	4
GO:0006469	negative regulation of protein kinase activity	6/1007	75/16374	0.313993	0.620788	0.559434	PRKRIP1/WWTR1/TAF7/WARS/HSPB1/SPRED1	6
GO:0008585	female gonad development	6/1007	75/16374	0.313993	0.620788	0.559434	NUP107/ZNF830/UBB/VGF/UBE3A/KITLG	6
GO:0031109	microtubule polymerization or depolymerization	6/1007	75/16374	0.313993	0.620788	0.559434	CRYAB/FKBP4/ARHGEF2/CLIP1/RPS3/FGF13	6
GO:0001975	response to amphetamine	3/1007	32/16374	0.314265	0.620788	0.559434	RGS17/HPRT1/RANBP2	3
GO:0003176	aortic valve development	3/1007	32/16374	0.314265	0.620788	0.559434	ROCK2/SLIT2/ROBO1	3
GO:0007019	microtubule depolymerization	3/1007	32/16374	0.314265	0.620788	0.559434	ARHGEF2/KIF2A/FGF13	3
GO:0008631	intrinsic apoptotic signaling pathway in response to oxidative stress	3/1007	32/16374	0.314265	0.620788	0.559434	UBQLN1/TRAP1/HSPB1	3
GO:0010811	positive regulation of cell-substrate adhesion	3/1007	32/16374	0.314265	0.620788	0.559434	ITGA3/PRKCE/LIMS1	3
GO:0015698	inorganic anion transport	3/1007	32/16374	0.314265	0.620788	0.559434	SLC4A7/VDAC1/VDAC3	3
GO:0051567	histone H3-K9 methylation	3/1007	32/16374	0.314265	0.620788	0.559434	RIF1/KDM1A/ZNF274	3
GO:0070207	protein homotrimerization	3/1007	32/16374	0.314265	0.620788	0.559434	HSF1/PNPT1/MGST1	3
GO:0071482	cellular response to light stimulus	3/1007	32/16374	0.314265	0.620788	0.559434	RPL26/METAP2/NPM1	3
GO:0000466	maturation of 5.8S rRNA from tricistronic rRNA transcript (SSU-rRNA, 5.8S rRNA, LSU-rRNA)	1/1007	6/16374	0.31675	0.620788	0.559434	RCL1	1
GO:0001302	replicative cell aging	1/1007	6/16374	0.31675	0.620788	0.559434	WRN	1
GO:0001514	selenocysteine incorporation	1/1007	6/16374	0.31675	0.620788	0.559434	RPL30	1
GO:0002090	regulation of receptor internalization	1/1007	6/16374	0.31675	0.620788	0.559434	ARF1	1
GO:0002246	wound healing involved in inflammatory response	1/1007	6/16374	0.31675	0.620788	0.559434	HMOX1	1
GO:0002686	negative regulation of leukocyte migration	1/1007	6/16374	0.31675	0.620788	0.559434	HMOX1	1
GO:0006164	purine nucleotide biosynthetic process	1/1007	6/16374	0.31675	0.620788	0.559434	HPRT1	1
GO:0006301	postreplication repair	1/1007	6/16374	0.31675	0.620788	0.559434	UBE2B	1
GO:0006617	SRP-dependent cotranslational protein targeting to membrane, signal sequence recognition	1/1007	6/16374	0.31675	0.620788	0.559434	SRP54	1
GO:0006686	sphingomyelin biosynthetic process	1/1007	6/16374	0.31675	0.620788	0.559434	SPTLC1	1
GO:0007182	common-partner SMAD protein phosphorylation	1/1007	6/16374	0.31675	0.620788	0.559434	TGFBR2	1
GO:0007195	adenylate cyclase-inhibiting dopamine receptor signaling pathway	1/1007	6/16374	0.31675	0.620788	0.559434	FLNA	1
GO:0008063	Toll signaling pathway	1/1007	6/16374	0.31675	0.620788	0.559434	TRAF3	1
GO:0009251	glucan catabolic process	1/1007	6/16374	0.31675	0.620788	0.559434	PPP1CB	1
GO:0009301	snRNA transcription	1/1007	6/16374	0.31675	0.620788	0.559434	USPL1	1
GO:0009597	detection of virus	1/1007	6/16374	0.31675	0.620788	0.559434	SERINC5	1
GO:0010255	glucose mediated signaling pathway	1/1007	6/16374	0.31675	0.620788	0.559434	SMARCA4	1
GO:0010657	muscle cell apoptotic process	1/1007	6/16374	0.31675	0.620788	0.559434	HMOX1	1
GO:0010757	negative regulation of plasminogen activation	1/1007	6/16374	0.31675	0.620788	0.559434	SERPINE2	1
GO:0010792	DNA double-strand break processing involved in repair via single-strand annealing	1/1007	6/16374	0.31675	0.620788	0.559434	RBBP8	1
GO:0014807	regulation of somitogenesis	1/1007	6/16374	0.31675	0.620788	0.559434	DLL1	1
GO:0015871	choline transport	1/1007	6/16374	0.31675	0.620788	0.559434	PSEN1	1
GO:0018206	peptidyl-methionine modification	1/1007	6/16374	0.31675	0.620788	0.559434	METAP2	1
GO:0021631	optic nerve morphogenesis	1/1007	6/16374	0.31675	0.620788	0.559434	EPHB2	1
GO:0030510	regulation of BMP signaling pathway	1/1007	6/16374	0.31675	0.620788	0.559434	ITGA3	1
GO:0030578	PML body organization	1/1007	6/16374	0.31675	0.620788	0.559434	SERBP1	1
GO:0030854	positive regulation of granulocyte differentiation	1/1007	6/16374	0.31675	0.620788	0.559434	RUNX1	1
GO:0031573	intra-S DNA damage checkpoint	1/1007	6/16374	0.31675	0.620788	0.559434	XPC	1
GO:0032675	regulation of interleukin-6 production	1/1007	6/16374	0.31675	0.620788	0.559434	CAPN2	1
GO:0032876	negative regulation of DNA endoreduplication	1/1007	6/16374	0.31675	0.620788	0.559434	FBXW7	1
GO:0033119	negative regulation of RNA splicing	1/1007	6/16374	0.31675	0.620788	0.559434	RPS13	1
GO:0034238	macrophage fusion	1/1007	6/16374	0.31675	0.620788	0.559434	ADAM9	1
GO:0034498	early endosome to Golgi transport	1/1007	6/16374	0.31675	0.620788	0.559434	SNX1	1
GO:0035520	monoubiquitinated protein deubiquitination	1/1007	6/16374	0.31675	0.620788	0.559434	USP15	1
GO:0035601	protein deacylation	1/1007	6/16374	0.31675	0.620788	0.559434	SPRED1	1
GO:0035740	CD8-positive, alpha-beta T cell proliferation	1/1007	6/16374	0.31675	0.620788	0.559434	SH3RF1	1
GO:0036003	positive regulation of transcription from RNA polymerase II promoter in response to stress	1/1007	6/16374	0.31675	0.620788	0.559434	ATF4	1
GO:0036492	eiF2alpha phosphorylation in response to endoplasmic reticulum stress	1/1007	6/16374	0.31675	0.620788	0.559434	EIF2AK3	1
GO:0038063	collagen-activated tyrosine kinase receptor signaling pathway	1/1007	6/16374	0.31675	0.620788	0.559434	DDR2	1
GO:0038203	TORC2 signaling	1/1007	6/16374	0.31675	0.620788	0.559434	PRR5L	1
GO:0042713	sperm ejaculation	1/1007	6/16374	0.31675	0.620788	0.559434	ACVR2A	1
GO:0043305	negative regulation of mast cell degranulation	1/1007	6/16374	0.31675	0.620788	0.559434	HMOX1	1
GO:0043368	positive T cell selection	1/1007	6/16374	0.31675	0.620788	0.559434	CYLD	1
GO:0043486	histone exchange	1/1007	6/16374	0.31675	0.620788	0.559434	PTMA	1
GO:0043619	regulation of transcription from RNA polymerase II promoter in response to oxidative stress	1/1007	6/16374	0.31675	0.620788	0.559434	HMOX1	1
GO:0043985	histone H4-R3 methylation	1/1007	6/16374	0.31675	0.620788	0.559434	PRDM4	1
GO:0044247	cellular polysaccharide catabolic process	1/1007	6/16374	0.31675	0.620788	0.559434	PPP1CB	1
GO:0045046	protein import into peroxisome membrane	1/1007	6/16374	0.31675	0.620788	0.559434	PEX3	1
GO:0045341	MHC class I biosynthetic process	1/1007	6/16374	0.31675	0.620788	0.559434	HSPH1	1
GO:0045542	positive regulation of cholesterol biosynthetic process	1/1007	6/16374	0.31675	0.620788	0.559434	POR	1
GO:0045627	positive regulation of T-helper 1 cell differentiation	1/1007	6/16374	0.31675	0.620788	0.559434	ANXA1	1
GO:0045656	negative regulation of monocyte differentiation	1/1007	6/16374	0.31675	0.620788	0.559434	CDK6	1
GO:0045910	negative regulation of DNA recombination	1/1007	6/16374	0.31675	0.620788	0.559434	ZRANB3	1
GO:0046599	regulation of centriole replication	1/1007	6/16374	0.31675	0.620788	0.559434	NPM1	1
GO:0046822	regulation of nucleocytoplasmic transport	1/1007	6/16374	0.31675	0.620788	0.559434	NUP214	1
GO:0046826	negative regulation of protein export from nucleus	1/1007	6/16374	0.31675	0.620788	0.559434	TXN	1
GO:0048702	embryonic neurocranium morphogenesis	1/1007	6/16374	0.31675	0.620788	0.559434	MTHFD1L	1
GO:0048752	semicircular canal morphogenesis	1/1007	6/16374	0.31675	0.620788	0.559434	CHD7	1
GO:0048840	otolith development	1/1007	6/16374	0.31675	0.620788	0.559434	ATG5	1
GO:0050688	regulation of defense response to virus	1/1007	6/16374	0.31675	0.620788	0.559434	TRAF3	1
GO:0050720	interleukin-1 beta biosynthetic process	1/1007	6/16374	0.31675	0.620788	0.559434	EGR1	1
GO:0051026	chiasma assembly	1/1007	6/16374	0.31675	0.620788	0.559434	UBE2B	1
GO:0051058	negative regulation of small GTPase mediated signal transduction	1/1007	6/16374	0.31675	0.620788	0.559434	SLIT2	1
GO:0051096	positive regulation of helicase activity	1/1007	6/16374	0.31675	0.620788	0.559434	SSBP1	1
GO:0051099	positive regulation of binding	1/1007	6/16374	0.31675	0.620788	0.559434	S100A10	1
GO:0051155	positive regulation of striated muscle cell differentiation	1/1007	6/16374	0.31675	0.620788	0.559434	MORF4L2	1
GO:0051224	negative regulation of protein transport	1/1007	6/16374	0.31675	0.620788	0.559434	SNX3	1
GO:0051573	negative regulation of histone H3-K9 methylation	1/1007	6/16374	0.31675	0.620788	0.559434	KDM1A	1
GO:0051938	L-glutamate import	1/1007	6/16374	0.31675	0.620788	0.559434	PSEN1	1
GO:0060304	regulation of phosphatidylinositol dephosphorylation	1/1007	6/16374	0.31675	0.620788	0.559434	MTMR2	1
GO:0060372	regulation of atrial cardiac muscle cell membrane repolarization	1/1007	6/16374	0.31675	0.620788	0.559434	CACNA1D	1
GO:0060390	regulation of SMAD protein signal transduction	1/1007	6/16374	0.31675	0.620788	0.559434	WWTR1	1
GO:0060433	bronchus development	1/1007	6/16374	0.31675	0.620788	0.559434	TGFBR2	1
GO:0060437	lung growth	1/1007	6/16374	0.31675	0.620788	0.559434	TMEM38B	1
GO:0060544	regulation of necroptotic process	1/1007	6/16374	0.31675	0.620788	0.559434	CYLD	1
GO:0060628	regulation of ER to Golgi vesicle-mediated transport	1/1007	6/16374	0.31675	0.620788	0.559434	SCFD1	1
GO:0060710	chorio-allantoic fusion	1/1007	6/16374	0.31675	0.620788	0.559434	DNAJB6	1
GO:0060729	intestinal epithelial structure maintenance	1/1007	6/16374	0.31675	0.620788	0.559434	ZNF830	1
GO:0060836	lymphatic endothelial cell differentiation	1/1007	6/16374	0.31675	0.620788	0.559434	PDPN	1
GO:0060872	semicircular canal development	1/1007	6/16374	0.31675	0.620788	0.559434	CHD7	1
GO:0060911	cardiac cell fate commitment	1/1007	6/16374	0.31675	0.620788	0.559434	TENM4	1
GO:0060965	negative regulation of gene silencing by miRNA	1/1007	6/16374	0.31675	0.620788	0.559434	NEAT1	1
GO:0060992	response to fungicide	1/1007	6/16374	0.31675	0.620788	0.559434	KDM1A	1
GO:0061000	negative regulation of dendritic spine development	1/1007	6/16374	0.31675	0.620788	0.559434	SRGAP2C	1
[truncated: 2,005 more rows]

## Sheet: Fig4B-qNSC2 vs pNSC
The GO analysis of down-regulate genes of qNSC2 compared with pNSC
ID	Description	GeneRatio	BgRatio	pvalue	p.adjust	qvalue	geneID	Count
GO:0043043	peptide biosynthetic process	101/834	328/16374	8.00108e-52	2.9804e-48	2.66899e-48	IARS/DHX36/VIM/RPL10A/CARS/SARS/GARS/WARS/LARS/YARS/RPS27L/EIF3H/AARS/EIF1/LARP4/MKNK2/MARS/FAM129A/RPS2/RPL13/RPS25/RACK1/EIF3B/EIF4A1/EPRS/RPL35/PTCD3/RPL10/RPL12/EIF2S2/EIF4B/EIF2S3/RPL41/RBM3/RPS7/LARP4B/NPM1/EIF2B3/EEF1A1/RPS26/RPS18/EIF5/RPS16/MAGOH/RPL37/RPS21/RPL13A/RPL23/EEF1D/RPS12/RPL23A/RPL21/EIF2S1/ELAVL1/RPL29/EIF3K/RPL9/RPS19/RPS13/RPS15/RPL3/EIF5B/RPS4Y1/PABPC1/GCN1/RPL37A/RARS2/N…	101
GO:0006412	translation	116/834	471/16374	2.42055e-48	4.50827e-45	4.03722e-45	IARS/DHX36/VIM/RPL10A/CARS/SARS/GARS/LRPPRC/WARS/LARS/YARS/RPS27L/EIF3H/AARS/EIF1/LARP4/MKNK2/MRPL50/MARS/FAM129A/RPS2/RPL13/RPS25/RACK1/EIF3B/EIF4A1/EPRS/MRPL18/RPL35/PTCD3/MRPL21/RPL10/RPL12/EIF2S2/EIF4B/EIF2S3/RPL41/UQCC1/RBM3/RPS7/LARP4B/NPM1/EIF2B3/EEF1A1/RPS26/RPS18/EIF5/RPS16/MAGOH/RPL37/GFM1/RPS21/RPL13A/RPL23/RPL36AL/EEF1D/MRPS18C/RPS12/PABPC4/RPL23A/RPL21/EIF2S1/DAP3/ELAVL1/RPL29/EIF3K/…	116
GO:0006413	translational initiation	66/834	160/16374	3.38675e-43	4.20521e-40	3.76583e-40	RPL10A/EIF3H/EIF1/HSPB1/RPS2/RPL13/RPS25/EIF3B/EIF4A1/RPL35/RPL10/RPL12/EIF2S2/EIF4B/EIF2S3/RPL41/RPS7/EIF2B3/RPS26/RPS18/EIF5/RPS16/RPL37/RPS21/RPL13A/RPL23/RPS12/RPL23A/RPL21/EIF2S1/RPL29/EIF3K/RPL9/RPS19/RPS13/RPS15/RPL3/EIF5B/RPS4Y1/PABPC1/RPL37A/RPS6/RPS20/RPS23/EIF3M/EIF2B1/RPL19/RPL24/RPS9/RPL27/RPL6/RPL14/RPLP2/RPL28/EIF3A/RPS27/RPL36/RPL38/RPL15/DHX29/RPS8/RPS27A/RPS3A/RPL7A/RPL26/RPL27A	66
GO:0000184	nuclear-transcribed mRNA catabolic process, nonsense-mediated decay	56/834	118/16374	6.92689e-41	6.45066e-38	5.77666e-38	SMG6/RPL10A/RPS2/RPL13/RPS25/RPL35/RPL10/RPL12/RPL41/RPS7/RPS26/RPS18/RPS16/MAGOH/RPL37/RPS21/RPL13A/RPL23/ETF1/RPS12/RPL23A/RPL21/RPL29/RPL9/RPS19/RPS13/RPS15/DHX34/RPL3/RPS4Y1/PABPC1/PARN/RPL37A/RPS6/RPS20/RPS23/RPL19/RPL24/RPS9/RPL27/RPL6/CASC3/RPL14/RPLP2/RNPS1/RPL28/RPS27/RPL36/RPL38/RPL15/RPS8/RPS27A/RPS3A/RPL7A/RPL26/RPL27A	56
GO:0019080	viral gene expression	54/834	111/16374	3.45863e-40	2.57668e-37	2.30745e-37	RPL10A/RPS2/RPL13/NUP214/RPS25/RANBP2/RPL35/RPL10/NUP98/RPL12/RPL41/RPS7/RPS26/RPS18/RPS16/NUP58/RPL37/RPS21/RPL13A/RPL23/NUP153/RPS12/RPL23A/RPL21/RPL29/RPL9/RPS19/RPS13/RPS15/RPL3/NUP107/RPS4Y1/RPL37A/RPS6/RPS20/RPS23/RPL19/RPL24/RPS9/RPL27/RPL6/RPL14/RPLP2/RPL28/RPS27/RPL36/RPL38/RPL15/RPS8/RPS27A/RPS3A/RPL7A/RPL26/RPL27A	54
GO:0006614	SRP-dependent cotranslational protein targeting to membrane	51/834	98/16374	6.31149e-40	3.91838e-37	3.50896e-37	RPL10A/RPS2/SRP54/RPL13/RPS25/RPL35/RPL10/RPL12/RPL41/RPS7/RPS26/RPS18/RPS16/RPL37/RPS21/RPL13A/RPL23/RPS12/RPL23A/RPL21/SRP14/RPL29/RPL9/RPS19/RPS13/RPS15/RPL3/RPS4Y1/RPL37A/RPS6/RPS20/RPS23/SRP19/RPL19/RPL24/RPS9/RPL27/RPL6/RPL14/RPLP2/RPL28/RPS27/RPL36/RPL38/RPL15/RPS8/RPS27A/RPS3A/RPL7A/RPL26/RPL27A	51
GO:0019083	viral transcription	57/834	149/16374	2.82355e-35	1.50253e-32	1.34554e-32	RPL10A/RPS2/RPL13/NUP214/RPS25/RANBP2/RPL35/RPL10/NUP98/RPL12/RPL41/RPS7/RPS26/RPS18/RPS16/NUP58/RPL37/RPS21/RPL13A/RPL23/NUP153/RPS12/RPL23A/RPL21/CCNT1/RPL29/RPL9/RPS19/RPS13/RPS15/RPL3/NUP107/RPS4Y1/RPL37A/RPS6/RPS20/RPS23/RPL19/RPL24/RPS9/RPL27/RPL6/POLR2B/RPL14/GTF2F2/RPLP2/RPL28/RPS27/RPL36/RPL38/RPL15/RPS8/RPS27A/RPS3A/RPL7A/RPL26/RPL27A	57
GO:0033554	cellular response to stress	48/834	237/16374	1.15209e-16	5.36442e-14	4.80391e-14	CAMK2D/NAMPT/CRYAB/HSPH1/PRKDC/HSP90AA1/PSME4/PTGES3/CHORDC1/FKBP4/BAG3/HSF1/HSPA1A/RPTOR/EPAS1/UBB/DNAJB6/DNAJC7/NUP214/RANBP2/DNAJB1/PSMD1/NUP98/PSMA7/TP53/PNPT1/HSPA8/MCL1/ROCK2/HMGA2/HSP90AB1/PSMD14/DYRK3/NUP58/PSMB4/NUP153/PSMB1/UBC/ATR/NUP107/NEK6/CHCHD2/MAPKAPK2/PSMD12/BACH1/PSMB7/RPS27A/PSMD5	48
GO:0034605	cellular response to heat	31/834	116/16374	1.12087e-14	4.63917e-12	4.15444e-12	CAMK2D/CRYAB/HSPH1/DHX36/HSP90AA1/PTGES3/CHORDC1/MYOF/FKBP4/BAG3/HMOX1/HSF1/HSPA1A/RPTOR/DNAJB6/DNAJC7/NUP214/HSPA6/VCP/RANBP2/CDKN1A/DNAJB1/NUP98/HSPA8/HSP90AB1/NUP58/NUP153/EIF2S1/ATR/NUP107/MAPKAPK2	31
GO:1900034	regulation of cellular response to heat	24/834	77/16374	2.80539e-13	1.04501e-10	9.3582e-11	CAMK2D/CRYAB/HSPH1/HSP90AA1/PTGES3/CHORDC1/FKBP4/BAG3/HSF1/HSPA1A/RPTOR/DNAJB6/DNAJC7/NUP214/RANBP2/DNAJB1/NUP98/HSPA8/HSP90AB1/NUP58/NUP153/ATR/NUP107/MAPKAPK2	24
GO:0042254	ribosome biogenesis	33/834	161/16374	5.1372e-12	1.73964e-09	1.55787e-09	DDX21/NOP58/XPO1/WDR43/CEBPZ/RPS2/DDX51/DHX37/DDX31/RPS7/PDCD11/NPM1/RPS16/SNU13/RRN3/XRN2/GLUL/NAF1/NOL8/RPS19/RPS15/FCF1/RPS6/WDR36/SDAD1/RPS9/RPL27/UTP20/RPL14/HEATR1/RPS27/CHD7/RPL26	33
GO:0009408	response to heat	28/834	120/16374	8.04406e-12	2.49701e-09	2.23611e-09	CAMK2D/CRYAB/HSPH1/HSP90AA1/PTGES3/CHORDC1/FKBP4/BAG3/HSF1/HSPA1A/RPTOR/DNAJB6/DNAJC7/NUP214/RANBP2/DNAJB1/NUP98/HSPA8/EIF2B3/DNAJA1/HSP90AB1/NUP58/NUP153/ATR/NUP107/DNAJA4/EIF2B1/MAPKAPK2	28
GO:0022613	ribonucleoprotein complex biogenesis	31/834	148/16374	1.25811e-11	3.60496e-09	3.22829e-09	DDX21/NOP58/XPO1/WDR43/RPS2/DDX51/DHX37/TGS1/MRTO4/RPS7/PDCD11/NPM1/RPS16/SNU13/XRN2/NOL8/RPS19/RPS15/FCF1/RPS6/WDR36/SDAD1/RPS9/RPL27/UTP20/RPL14/HEATR1/RPS27/CHD7/RIOK3/RPL26	31
GO:0043488	regulation of mRNA stability	25/834	106/16374	8.27257e-11	2.2011e-08	1.97111e-08	DHX36/VIM/PSME4/XPO1/HSPA1A/HSPB1/UBB/NUP214/PSMD1/PSMA7/HSPA8/PSMD14/PSMB4/PABPC4/PSMB1/ELAVL1/UBC/PABPC1/PARN/MAPKAPK2/YWHAZ/PSMD12/PSMB7/RPS27A/PSMD5	25
GO:0007004	telomere maintenance via telomerase	19/834	66/16374	3.9627e-10	9.84071e-08	8.81249e-08	SMG6/HSP90AA1/PTGES3/CCT4/XRCC5/HNRNPC/CCT3/HNRNPU/CCT5/HSP90AB1/NAF1/ATR/CCT6A/PARN/NAT10/TCP1/CTNNB1/CCT2/MAP3K4	19
GO:0006364	rRNA processing	27/834	132/16374	4.66548e-10	1.08618e-07	9.72692e-08	DDX21/NOP58/USP36/WDR43/RPS2/BUD23/DDX51/DHX37/RPS7/PDCD11/RPS16/SNU13/XRN2/NOL8/RPS19/RPS15/FCF1/RPS6/WDR36/RPS9/RPL27/UTP20/RPL14/HEATR1/RPS27/CHD7/RPL26	27
GO:0006278	RNA-dependent DNA biosynthetic process	17/834	56/16374	1.33644e-09	2.92837e-07	2.6224e-07	SMG6/CCT4/XRCC5/HNRNPC/CCT3/HNRNPU/CCT5/NAF1/ATR/CCT6A/PARN/NAT10/TCP1/CTNNB1/PPIA/CCT2/MAP3K4	17
GO:0010833	telomere maintenance via telomere lengthening	18/834	66/16374	3.00977e-09	6.22855e-07	5.57776e-07	SMG6/DHX36/CCT4/XRCC5/HNRNPC/CCT3/HNRNPU/HNRNPA2B1/CCT5/NAF1/ATR/CCT6A/PARN/NAT10/TCP1/CTNNB1/CCT2/MAP3K4	18
GO:0006457	protein folding	25/834	126/16374	3.98213e-09	7.80707e-07	6.99134e-07	HSPE1/CRYAB/CCT4/TBCA/FKBP4/BAG3/DNAJB6/DNAJC7/HSPA4L/ST13/CCT3/VCP/RANBP2/HSPA8/CCT5/PPID/DNAJA1/GNB1/ATF6/CCT6A/TBCD/TCP1/CSNK2A1/PPIA/CCT2	25
GO:0006397	mRNA processing	35/834	230/16374	6.00639e-09	1.11869e-06	1.0018e-06	DHX36/WTAP/HSF1/METTL16/IWS1/SFSWAP/SNRPD1/STRAP/TENT2/SNRPG/NUP98/RBM25/TGS1/HSPA8/PRPF3/HNRNPA2B1/PDCD11/ARL6IP4/PRPF8/PRDX6/NOCT/SNRPD3/XRN2/RBM28/TSEN2/CLASRP/ADAR/ZNF830/NSRP1/PRPF6/NUDT21/SCAF11/TENT4A/SF3B2/RNPS1	35
GO:0006418	tRNA aminoacylation for protein translation	13/834	35/16374	7.35654e-09	1.30491e-06	1.16856e-06	IARS/CARS/SARS/GARS/WARS/LARS/YARS/AARS/MARS/EPRS/RARS2/FARSB/RARS	13
GO:0000398	mRNA splicing, via spliceosome	39/834	287/16374	2.11018e-08	3.57291e-06	3.19959e-06	HNRNPA3/WTAP/HNRNPC/METTL16/PCBP2/SNRNP200/SFSWAP/SNRPD1/STRAP/HNRNPF/SNRPG/NUP98/RBM25/TGS1/HNRNPU/HSPA8/PRPF3/HNRNPA2B1/PRPF8/SNU13/PRDX6/SNRPD3/MAGOH/NOVA1/HNRNPL/ELAVL1/NSRP1/PRPF6/NUDT21/PABPC1/SCAF11/SF3B3/PRPF40A/DDX46/CASC3/POLR2B/SF3B2/GTF2F2/RNPS1	39
GO:0070498	interleukin-1-mediated signaling pathway	21/834	100/16374	2.44519e-08	3.96015e-06	3.54637e-06	SQSTM1/PSME4/IRAK2/IL1R1/UBB/IL1RAP/FBXW11/PSMD1/PSMA7/NFKBIA/PSMD14/PSMB4/MAP3K7/PSMB1/SKP1/UBC/OTUD4/PSMD12/PSMB7/RPS27A/PSMD5	21
GO:0050821	protein stabilization	28/834	169/16374	3.09469e-08	4.80321e-06	4.30134e-06	CRYAB/HSPD1/HSP90AA1/PTGES3/CCT4/USP36/GTPBP4/BAG3/TRIM44/NAA15/TAF1/HSPA1A/CCT3/CDKN1A/TP53/RPS7/CCT5/HSP90AB1/RPL23/ATP1B3/CCT6A/UBE2B/TCP1/ZNF207/CCNH/CCT2/FLNA/FBXW7	28
GO:0043066	negative regulation of apoptotic process	54/834	481/16374	3.95816e-08	5.89766e-06	5.28143e-06	BIRC6/SQSTM1/CRYAB/HSPA9/CD44/PRKDC/CHST11/HSPD1/BAG3/SH3RF1/PDPN/NAA15/STK40/HSPA1A/HSPB1/UBB/STAT3/ANXA1/NQO1/CDKN1A/IFIT3/RPL10/YME1L1/TP53/NFKBIA/MCL1/NPM1/HMGA2/ANXA5/DNAJA1/BCL2L1/DYRK3/TPT1/ASNS/ADAR/ZNF830/ATG5/RAF1/UBC/UBE2B/RPS6/API5/ZFAND6/RPS6KA3/GSTP1/YWHAZ/OGG1/WNK3/GLO1/CTNNB1/FLNA/RPS27A/ANKLE2/RPS3A	54
GO:0032212	positive regulation of telomere maintenance via telomerase	12/834	34/16374	5.46935e-08	7.83589e-06	7.01715e-06	CCT4/XRCC5/CCT3/CCT5/NAF1/ATR/CCT6A/PARN/TCP1/CTNNB1/CCT2/MAP3K4	12
GO:0071480	cellular response to gamma radiation	11/834	29/16374	8.33331e-08	1.14969e-05	1.02956e-05	CRYAB/MDM2/MAP3K20/XRCC5/HSF1/CDKN1A/TP53/BCL2L1/WRN/ATR/RPL26	11
GO:0070198	protein localization to chromosome, telomeric region	10/834	24/16374	1.13787e-07	1.51377e-05	1.3556e-05	CCT4/XRCC5/CCT3/CCT5/H2AFY/ATR/CCT6A/TCP1/GNL3/CCT2	10
GO:0002181	cytoplasmic translation	11/834	33/16374	3.86401e-07	4.96325e-05	4.44466e-05	DHX36/RPL10A/RPL41/RPS26/RPS21/RPS23/RPL19/RPL24/RPL6/RPL36/RPL38	11
GO:0051973	positive regulation of telomerase activity	11/834	34/16374	5.45043e-07	6.76762e-05	6.0605e-05	HSP90AA1/PTGES3/CCT4/XRCC5/HSP90AB1/NAF1/PARN/TCP1/CTNNB1/CCT2/MAP3K4	11
GO:0070555	response to interleukin-1	21/834	120/16374	6.39186e-07	7.68055e-05	6.87804e-05	CHI3L1/SQSTM1/PSME4/IRAK2/IL1R1/UBB/IL1RAP/FBXW11/PSMD1/PSMA7/NFKBIA/PSMD14/PSMB4/MAP3K7/PSMB1/SKP1/UBC/PSMD12/PSMB7/RPS27A/PSMD5	21
GO:0006986	response to unfolded protein	16/834	74/16374	7.42348e-07	8.64139e-05	7.73849e-05	HSPE1/HSPH1/HSPD1/HSP90AA1/HSPA1A/HSPB1/HSPA4L/VCP/DNAJB1/SERPINH1/HSPA4/HSPA8/DNAJA1/HSP90AB1/FAF2/ATF6	16
GO:0090670	RNA localization to Cajal body	8/834	18/16374	1.21457e-06	0.000130629	0.00011698	CCT4/CCT3/CCT5/NAF1/CCT6A/PARN/TCP1/CCT2	8
GO:0090672	telomerase RNA localization	8/834	18/16374	1.21457e-06	0.000130629	0.00011698	CCT4/CCT3/CCT5/NAF1/CCT6A/PARN/TCP1/CCT2	8
GO:1903405	protein localization to nuclear body	6/834	9/16374	1.26245e-06	0.000130629	0.00011698	CCT4/CCT3/CCT5/CCT6A/TCP1/CCT2	6
GO:1904871	positive regulation of protein localization to Cajal body	6/834	9/16374	1.26245e-06	0.000130629	0.00011698	CCT4/CCT3/CCT5/CCT6A/TCP1/CCT2	6
GO:0036294	cellular response to decreased oxygen levels	17/834	87/16374	1.52332e-06	0.000153361	0.000137337	PSME4/EPAS1/UBB/PSMD1/PSMA7/TP53/ROCK2/PSMD14/PSMB4/PSMB1/UBC/CHCHD2/PSMD12/BACH1/PSMB7/RPS27A/PSMD5	17
GO:0075733	intracellular transport of virus	13/834	53/16374	1.78654e-06	0.000175128	0.00015683	KPNB1/XPO1/UBB/NUP214/UBAP1/RANBP2/NUP98/KPNA1/NUP58/NUP153/UBC/NUP107/RPS27A	13
GO:0090671	telomerase RNA localization to Cajal body	8/834	19/16374	2.0043e-06	0.000191437	0.000171434	CCT4/CCT3/CCT5/NAF1/CCT6A/PARN/TCP1/CCT2	8
GO:1904851	positive regulation of establishment of protein localization to telomere	6/834	10/16374	3.01965e-06	0.000274346	0.000245681	CCT4/CCT3/CCT5/CCT6A/TCP1/CCT2	6
GO:1904867	protein localization to Cajal body	6/834	10/16374	3.01965e-06	0.000274346	0.000245681	CCT4/CCT3/CCT5/CCT6A/TCP1/CCT2	6
GO:1904874	positive regulation of telomerase RNA localization to Cajal body	7/834	15/16374	3.89494e-06	0.000345444	0.00030935	CCT4/CCT3/CCT5/NAF1/CCT6A/TCP1/CCT2	7
GO:0051131	chaperone-mediated protein complex assembly	7/834	16/16374	6.61992e-06	0.000565912	0.000506782	HSPD1/HSP90AA1/PTGES3/HSPA1A/HSPA4/HSP90AB1/CCT2	7
GO:1905323	telomerase holoenzyme complex assembly	4/834	4/16374	6.6846e-06	0.000565912	0.000506782	HSP90AA1/PTGES3/HSP90AB1/NAF1	4
GO:0071347	cellular response to interleukin-1	22/834	150/16374	7.30407e-06	0.000592798	0.000530859	CHI3L1/SQSTM1/PSME4/IRAK2/IL1R1/UBB/IL1RAP/FBXW11/GBP2/PSMD1/PSMA7/NFKBIA/PSMD14/PSMB4/MAP3K7/PSMB1/SKP1/UBC/PSMD12/PSMB7/RPS27A/PSMD5	22
GO:0043161	proteasome-mediated ubiquitin-dependent protein catabolic process	29/834	232/16374	7.32046e-06	0.000592798	0.000530859	MDM2/PSME4/UBE2D3/TAF1/HSPA1A/RNF216/RAD23A/RACK1/PCBP2/VCP/FBXW11/PSMD1/PSMA7/HSP90AB1/PSMD14/PSMB4/UBQLN1/PSMB1/KLHL42/SIAH1/UBE2B/SENP1/PSMD12/CTNNB1/USP14/SDCBP/PSMB7/PSMD5/RNF4	29
GO:1901564	organonitrogen compound metabolic process	14/834	69/16374	8.01005e-06	0.000634839	0.000568508	PSME4/LDLR/ODC1/NQO1/PSMD1/PSMA7/ROCK2/HSP90AB1/PSMD14/PSMB4/PSMB1/PSMD12/PSMB7/PSMD5	14
GO:0044770	cell cycle phase transition	19/834	119/16374	8.7568e-06	0.000679564	0.000608559	PSME4/TAF1/PSMD1/PSMA7/TP53/NPM1/H2AFY/PSMD14/DYRK3/PSMB4/NEK10/SLBP/PSMB1/SKP1/ANAPC1/PSMD12/PSMB7/PSMD5/FBXW7	19
GO:0061418	regulation of transcription from RNA polymerase II promoter in response to hypoxia	14/834	71/16374	1.13446e-05	0.00086242	0.000772309	PSME4/EPAS1/UBB/PSMD1/PSMA7/PSMD14/PSMB4/PSMB1/UBC/PSMD12/BACH1/PSMB7/RPS27A/PSMD5	14
GO:0070199	establishment of protein localization to chromosome	6/834	12/16374	1.21637e-05	0.000906199	0.000811513	CCT4/CCT3/CCT5/CCT6A/TCP1/CCT2	6
GO:0006446	regulation of translational initiation	8/834	24/16374	1.55304e-05	0.00113433	0.00101581	EIF3H/EIF1/HSPB1/EIF3B/EIF4B/EIF5/EIF3K/EIF5B	8
GO:0042026	protein refolding	7/834	18/16374	1.68335e-05	0.00118345	0.00105979	HSPD1/HSP90AA1/HSPA1A/ST13/HSPA6/HSPA8/DNAJA4	7
GO:0060218	hematopoietic stem cell differentiation	15/834	83/16374	1.68383e-05	0.00118345	0.00105979	HSPA9/PSME4/CBFB/XRCC5/PSMD1/PSMA7/TP53/CHD2/PSMD14/PSMB4/PSMB1/RUNX1/PSMD12/PSMB7/PSMD5	15
GO:0016579	protein deubiquitination	29/834	244/16374	1.93821e-05	0.00131542	0.00117798	MDM2/PSME4/USP36/UBB/RAD23A/VCP/PSMD1/PSMA7/TP53/USP38/NFKBIA/USP16/PSMD14/ACTB/PSMB4/MAP3K7/FOXK2/PSMB1/UBC/TRAF3/OTUD4/SNX3/PSMD12/USP14/CYLD/PSMB7/RPS27A/PSMD5/STAM	29
GO:0008380	RNA splicing	23/834	171/16374	1.94977e-05	0.00131542	0.00117798	WTAP/HSPA1A/HNRNPC/IWS1/SNRPD1/HNRNPF/SNRPG/RBM25/THOC1/PRPF3/ARL6IP4/PRPF8/RPS26/SNRPD3/RBM28/CLASRP/NOVA1/ZNF830/NSRP1/PRPF6/RPS13/SCAF11/SF3B2	23
GO:0016070	RNA metabolic process	12/834	56/16374	1.97755e-05	0.00131542	0.00117798	HNRNPA3/WTAP/HNRNPC/PCBP2/HNRNPF/HNRNPU/HNRNPA2B1/XRN2/NOVA1/HNRNPL/POLR2B/GTF2F2	12
GO:0006396	RNA processing	17/834	105/16374	2.1344e-05	0.00139485	0.00124911	SNHG7/HSPA1A/IWS1/HNRNPF/TMTC1/THOC1/HNRNPU/RBM3/RPS26/XRN2/ZFC3H1/NOVA1/HNRNPL/PABPC4/RNGTT/RPS13/CCNL1	17
GO:0019058	viral life cycle	23/834	173/16374	2.3571e-05	0.00151383	0.00135565	KPNB1/XPO1/HSPA1A/UBB/LDLR/NUP214/VCP/UBAP1/RANBP2/NUP98/PPID/KPNA1/HSP90AB1/NUP58/ITGB1/RAB1A/NUP153/UBC/NUP107/KPNA6/PCSK5/PPIA/RPS27A	23
GO:0016925	protein sumoylation	14/834	77/16374	2.98026e-05	0.0018816	0.001685	MDM2/NUP214/RANBP2/SENP5/NUP98/NSMCE2/UBA2/NUP58/NUP153/NUP107/GNL3/SENP1/UBE2I/CTNNB1	14
GO:0007021	tubulin complex assembly	4/834	5/16374	3.20673e-05	0.00199084	0.00178283	CRYAB/TBCA/TBCD/TCP1	4
GO:0006914	autophagy	37/834	359/16374	3.73322e-05	0.00227971	0.00204152	NAMPT/SQSTM1/LARS/USP36/CTTN/HMOX1/VTI1A/MAP1LC3B/TMEM208/RPTOR/HSPB1/VDAC1/STAT3/SESN2/VCP/PLEKHM1/TP53/AMBRA1/RHEB/HSPA8/MCL1/EEF1A1/RAB39A/RAB1A/ABL2/UBQLN1/MAP3K7/FOXK2/ATG5/HAP1/EXOC1/ANXA7/CLTC/DAPK3/RRAGD/LAMTOR1/FBXW7	37
GO:0031146	SCF-dependent proteasomal ubiquitin-dependent protein catabolic process	13/834	69/16374	3.85799e-05	0.0023179	0.00207571	PSME4/FBXW11/PSMD1/PSMA7/PSMD14/PSMB4/PSMB1/SKP1/PSMD12/WWTR1/PSMB7/PSMD5/FBXW7	13
GO:0006520	cellular amino acid metabolic process	14/834	79/16374	4.01632e-05	0.00234968	0.00210417	PSME4/SLC7A5/ODC1/ATF4/NQO1/PSMD1/PSMA7/PSMD14/PSMB4/SLC7A6/PSMB1/PSMD12/PSMB7/PSMD5	14
GO:0006521	regulation of cellular amino acid metabolic process	11/834	51/16374	4.10011e-05	0.00234968	0.00210417	PSME4/ODC1/NQO1/PSMD1/PSMA7/PSMD14/PSMB4/PSMB1/PSMD12/PSMB7/PSMD5	11
GO:0006611	protein export from nucleus	11/834	51/16374	4.10011e-05	0.00234968	0.00210417	HSPA9/MDM2/TXN/XPO1/BAG3/NUP214/TP53/XPO5/XPO4/STRADB/CTDSPL2	11
GO:0044839	cell cycle G2/M phase transition	22/834	168/16374	4.45203e-05	0.0025127	0.00225016	HSP90AA1/PSME4/DYNLL1/RAD51B/PSMD1/PSMA7/TP53/BRD4/NPM1/H2AFY/PSMD14/DYRK3/PSMB4/NEK10/PSMB1/SKP1/CEP192/PSMD12/BACH1/YWHAG/PSMB7/PSMD5	22
GO:0034599	cellular response to oxidative stress	16/834	101/16374	4.87154e-05	0.00270843	0.00242544	MAPKAP1/HMOX1/HSPA1A/LONP1/TXNRD1/EPAS1/SESN2/TP53/PNPT1/PRDX6/ETV5/EIF2S1/SLC7A11/GSTP1/VKORC1L1/ADNP2	16
GO:0000209	protein polyubiquitination	26/834	219/16374	5.24141e-05	0.00287121	0.00257121	SPSB1/PSME4/CBFB/TRIM44/UBE2D3/TAF1/UBB/FBXW11/PSMD1/PSMA7/UBE3C/PSMD14/PSMB4/PSMB1/SKP1/UBC/ARIH2/KLHL42/SIAH1/UBE2B/PSMD12/CTNNB1/PSMB7/RPS27A/PSMD5/FBXW7	26
GO:0044238	primary metabolic process	21/834	159/16374	5.80561e-05	0.00313419	0.00280671	PSME4/EDF1/TXNRD1/LDLR/ODC1/ABCA1/NQO1/PSMD1/PSMA7/TGS1/ROCK2/HSP90AB1/H2AFY/PSMD14/PSMB4/PSMB1/PLIN2/PSMD12/FDFT1/PSMB7/PSMD5	21
GO:0000377	RNA splicing, via transesterification reactions with bulged adenosine as nucleophile	14/834	82/16374	6.15956e-05	0.00327777	0.00293529	METTL16/SFSWAP/SNRPD1/STRAP/SNRPG/NUP98/TGS1/HSPA8/HNRNPA2B1/PRDX6/SNRPD3/PRPF6/SCAF11/RNPS1	14
GO:0019221	cytokine-mediated signaling pathway	38/834	383/16374	6.71817e-05	0.00352467	0.00315639	VIM/HSP90AA1/RAPGEF1/CBFB/TRIM44/HMOX1/IRAK2/IL1R1/HSPA1A/ADAM17/UBB/ABCE1/IL6R/RACK1/STAT3/ANXA1/IL1RAP/CDKN1A/TP53/HSPA8/MCL1/HSP90AB1/BCL2L1/ITGB1/OTULIN/CEBPD/ADAR/UBC/GAB2/RUNX1/OTUD4/CRK/GSTP1/YWHAZ/ZC3H15/PARP14/CYLD/RPS27A	38
GO:0090084	negative regulation of inclusion body assembly	5/834	10/16374	6.88817e-05	0.00356367	0.00319132	HSF1/HSPA1A/DNAJB6/DNAJB1/DNAJA4	5
GO:0051168	nuclear export	10/834	46/16374	8.5194e-05	0.00430457	0.0038548	MDM2/TXN/BAG3/LSG1/NEMF/AKAP13/TP53/NUP153/XPO4/CTDSPL2	10
GO:0019752	carboxylic acid metabolic process	11/834	55/16374	8.55135e-05	0.00430457	0.0038548	PSME4/ODC1/NQO1/PSMD1/PSMA7/PSMD14/PSMB4/PSMB1/PSMD12/PSMB7/PSMD5	11
GO:0070200	establishment of protein localization to telomere	6/834	16/16374	8.84008e-05	0.00439057	0.00393182	CCT4/CCT3/CCT5/CCT6A/TCP1/CCT2	6
GO:0045727	positive regulation of translation	12/834	65/16374	9.35898e-05	0.00458713	0.00410784	VIM/RPS27L/LARP4/FAM129A/RBM3/LARP4B/NPM1/ELAVL1/PABPC1/NAT10/SERP1/RPL26	12
GO:0002244	hematopoietic progenitor cell differentiation	18/834	130/16374	0.000104323	0.0050468	0.00451948	HSPA9/DHX36/PSME4/CBFB/SIPA1L3/TENT2/PSMD1/PSMA7/TP53/PSMD14/PSMB4/CEBPD/ADAR/PSMB1/RUNX1/PSMD12/PSMB7/PSMD5	18
GO:0001666	response to hypoxia	26/834	229/16374	0.00011072	0.00528759	0.00473511	CRYAB/PSME4/LONP1/EPAS1/ADAM17/UBB/CAPN2/PSMD1/PSMA7/TP53/ROCK2/ACTN4/PSMD14/PSMB4/RAF1/PSMB1/UBC/ANGPT2/CHCHD2/TGFB2/PSMD12/TGFBR2/BACH1/PSMB7/RPS27A/PSMD5	26
GO:0015031	protein transport	39/834	408/16374	0.000120391	0.00567667	0.00508354	VPS53/EHBP1/ARF1/LYST/SCFD2/DPH3/ADAMTS9/AGAP1/COG5/RACK1/CD63/UBAP1/LSG1/AAGAB/PLEKHM1/MON2/HSPA8/VEGFC/PPID/ACTN4/DNAJA1/BTF3/CCDC93/SLC7A11/ACSL3/ADAM9/CADPS/GAPVD1/EXOC1/ICE1/ASTN2/SNX3/TGFB2/WASHC2C/RABEP1/SERP1/PPIA/DGKD/ARL8B	39
GO:0048863	stem cell differentiation	20/834	156/16374	0.000131027	0.00605607	0.00542329	HSPA9/DHX36/PSME4/CBFB/OCIAD1/STAT3/PSMD1/PSMA7/HNRNPU/HMGA2/PSMD14/PSMB4/PSMB1/NUDT21/SETD2/RUNX1/TGFB2/PSMD12/PSMB7/PSMD5	20
GO:0072717	cellular response to actinomycin D	3/834	3/16374	0.000131689	0.00605607	0.00542329	MDM2/TP53/RPL23	3
GO:0000086	G2/M transition of mitotic cell cycle	24/834	208/16374	0.000156572	0.00702689	0.00629268	HSP90AA1/PSME4/CCNY/DYNLL1/RAD51B/FBXW11/CDKN1A/PPME1/PSMD1/PSMA7/TPD52L1/BRD4/PSMD14/ENSA/PSMB4/PSMB1/SKP1/CEP192/PSMD12/BACH1/YWHAG/CCNH/PSMB7/PSMD5	24
GO:0001649	osteoblast differentiation	24/834	208/16374	0.000156572	0.00702689	0.00629268	HSPE1/IARS/ACVR1/DDX21/CBFB/GTPBP4/HNRNPC/IL6R/SNRNP200/HNRNPU/FBN2/NOCT/DDR2/CEBPD/ADAR/SND1/RPS15/CLTC/CTNNB1/WWTR1/SH3PXD2B/SATB2/SMAD5/FAM20C	24
GO:0042274	ribosomal small subunit biogenesis	6/834	18/16374	0.000187709	0.00832401	0.00745426	RPS7/RPS16/RPS19/RPS15/RPS6/RIOK3	6
GO:0031145	anaphase-promoting complex-dependent catabolic process	13/834	81/16374	0.000213234	0.00934467	0.00836829	PSME4/UBB/PSMD1/PSMA7/PSMD14/PSMB4/PSMB1/UBC/ANAPC1/PSMD12/PSMB7/RPS27A/PSMD5	13
GO:0006406	mRNA export from nucleus	15/834	103/16374	0.000219106	0.00949035	0.00849874	SMG6/NUP214/IWS1/RANBP2/NUP98/THOC1/HNRNPA2B1/NUP58/MAGOH/SLBP/NUP153/SETD2/NUP107/CASC3/RNPS1	15
GO:1990830	cellular response to leukemia inhibitory factor	14/834	94/16374	0.00027733	0.0118742	0.0106335	MAT2A/GLDC/XRCC5/GCLM/CACYBP/HNRNPU/SBNO2/VEGFC/RNMT/PFKP/TRIM25/UBXN2A/ARID5B/NRP2	14
GO:0030163	protein catabolic process	24/834	217/16374	0.000297769	0.0126044	0.0112874	SERPINE2/MDM2/HSP90AA1/XPO1/LONP1/UBB/ODC1/CAPN2/VCP/PSMD1/HSPA8/EEF1A1/HSP90AB1/PSMD14/SIAH1/CTSL/CSNK2A1/SF3B3/SNX3/USP14/TRIM24/FLNA/UBXN2A/FBXW7	24
GO:0000278	mitotic cell cycle	20/834	166/16374	0.000304718	0.0127536	0.0114211	CLIP1/MDM2/HSF1/NUP214/HNRNPU/USP16/ENSA/ASNS/PPP5C/JTB/NEK6/EML4/TBCD/CLTC/DAPK3/WAPL/GEM/SDCBP/CYLD/SUGT1	20
GO:0051085	chaperone cofactor-dependent protein refolding	5/834	13/16374	0.000309405	0.0128059	0.0114679	HSPH1/PTGES3/DNAJC7/DNAJB1/GAK	5
GO:0007249	I-kappaB kinase/NF-kappaB signaling	26/834	245/16374	0.000327233	0.013395	0.0119954	SQSTM1/DHX36/DDX21/HMOX1/IRAK2/TNFRSF10B/HSPB1/UBB/ATP2C1/AKAP13/BRD4/NFKBIA/ROCK2/EEF1D/MAP3K7/PPP5C/UBC/NEK6/ZFAND6/GSTP1/TRIM25/UBE2I/CTNNB1/RIOK3/FLNA/RPS27A	26
GO:0071233	cellular response to leucine	4/834	8/16374	0.000396671	0.0158882	0.0142281	LARS/RPTOR/SESN2/RRAGD	4
GO:1990253	cellular response to leucine starvation	4/834	8/16374	0.000396671	0.0158882	0.0142281	LARS/SESN2/GCN1/RRAGD	4
GO:0006360	transcription by RNA polymerase I	9/834	46/16374	0.000444257	0.0176049	0.0157654	TAF1D/WDR43/TAF1/POLR1A/ATF4/RRN3/HEATR1/CCNH/FLNA	9
GO:0001732	formation of cytoplasmic translation initiation complex	5/834	14/16374	0.000461187	0.0180834	0.0161939	EIF3H/EIF3B/EIF3K/EIF3M/EIF3A	5
GO:0010972	negative regulation of G2/M transition of mitotic cell cycle	10/834	56/16374	0.00046945	0.0181725	0.0162737	PSME4/PSMD1/PSMA7/PSMD14/PSMB4/PSMB1/SKP1/PSMD12/PSMB7/PSMD5	10
GO:0038095	Fc-epsilon receptor signaling pathway	15/834	111/16374	0.000500134	0.0181725	0.0162737	PSME4/FBXW11/PSMD1/PSMA7/PSMD14/PSMB4/MAP3K7/PSMB1/SKP1/GAB2/VAV3/NFATC3/PSMD12/PSMB7/PSMD5	15
GO:0003274	endocardial cushion fusion	3/834	4/16374	0.000506702	0.0181725	0.0162737	ACVR1/TGFB2/TGFBR2	3
GO:0006610	ribosomal protein import into nucleus	3/834	4/16374	0.000506702	0.0181725	0.0162737	KPNB1/IPO5/RPL23	3
GO:0090669	telomerase RNA stabilization	3/834	4/16374	0.000506702	0.0181725	0.0162737	DHX36/NAF1/PARN	3
GO:0097198	histone H3-K36 trimethylation	3/834	4/16374	0.000506702	0.0181725	0.0162737	IWS1/BRD4/SETD2	3
GO:0097201	negative regulation of transcription from RNA polymerase II promoter in response to stress	3/834	4/16374	0.000506702	0.0181725	0.0162737	BAG3/HSPA1A/DNAJB1	3
GO:0042493	response to drug	24/834	225/16374	0.000507339	0.0181725	0.0162737	XPO1/XRCC5/SRP54/ADAM17/MGST1/GCLM/ABCA1/POR/CDKN1A/VEGFC/HMGA2/UQCRC2/ATG5/SRP14/ATR/PLIN2/UBE2B/VAV3/TENT4A/SRP19/MAP1B/TGFB2/TGFBR2/CTNNB1	24
GO:0044237	cellular metabolic process	16/834	123/16374	0.000507932	0.0181725	0.0162737	CRYAB/EIF3H/EIF1/HSPB1/VDAC1/EIF3B/CDKN1A/TP53/EIF4B/GADD45A/EIF5/ATG5/EIF3K/EIF5B/TGFBR2/DHX29	16
GO:0038061	NIK/NF-kappaB signaling	19/834	160/16374	0.000512245	0.0181725	0.0162737	CHI3L1/PSME4/TRIM44/TNFRSF10B/FBXW11/PSMD1/PSMA7/NFKBIA/ACTN4/TMSB4X/PSMD14/PSMB4/MAP3K7/PSMB1/SKP1/PSMD12/CYLD/PSMB7/PSMD5	19
GO:0030433	ubiquitin-dependent ERAD pathway	10/834	57/16374	0.000543768	0.0191088	0.0171122	NPLOC4/VCP/ECPAS/SEC61B/FAF2/UBE2G2/UBQLN1/TRIM25/USP14/DNAJC10	10
GO:0071456	cellular response to hypoxia	21/834	187/16374	0.000567025	0.0197399	0.0176774	MDM2/PSME4/HMOX1/EPAS1/UBB/PSMD1/PSMA7/TP53/ROCK2/GNB1/PSMD14/PSMB4/UBQLN1/PSMB1/UBC/CHCHD2/PSMD12/BACH1/PSMB7/RPS27A/PSMD5	21
GO:0033209	tumor necrosis factor-mediated signaling pathway	19/834	162/16374	0.000598146	0.0203671	0.0182391	PSME4/HSPA1A/ADAM17/RACK1/PSMD1/PSMA7/NFKBIA/ACTN4/TMSB4X/PSMD14/PSMB4/OTULIN/PSMB1/TRAF3/GSTP1/PSMD12/CYLD/PSMB7/PSMD5	19
GO:1902036	regulation of hematopoietic stem cell differentiation	11/834	68/16374	0.000599607	0.0203671	0.0182391	PSME4/CBFB/PSMD1/PSMA7/PSMD14/PSMB4/PSMB1/RUNX1/PSMD12/PSMB7/PSMD5	11
GO:0006511	ubiquitin-dependent protein catabolic process	31/834	325/16374	0.000601446	0.0203671	0.0182391	SQSTM1/SPSB1/MDM2/USP36/NPLOC4/TAF1/HSPA1A/RAD23A/RACK1/ARIH1/VCP/RPS7/USP38/USP16/HSP90AB1/PSMD14/RPL23/UBE3A/ARIH2/SIAH1/UBE2B/CSNK2A1/ANAPC1/SENP1/TRIM25/UBE2I/USP14/SDCBP/CYLD/TRPC4AP/FBXW7	31
GO:0097191	extrinsic apoptotic signaling pathway	20/834	175/16374	0.000607381	0.0203828	0.0182531	BIRC6/ACVR1/CTTN/HMOX1/SH3RF1/TNFRSF10B/HSPA1A/FGFR1/IL6R/GCLM/MCL1/BCL2L1/RAF1/ARHGEF2/STRADB/GSTP1/SCG2/DAPK3/TGFB2/CYLD	20
GO:0061077	chaperone-mediated protein folding	6/834	22/16374	0.000633324	0.0210637	0.0188628	CHORDC1/FKBP4/HSPB1/PPID/CSNK2A1/TRAP1	6
GO:0035973	aggrephagy	4/834	9/16374	0.000685248	0.0225889	0.0202287	SQSTM1/BAG3/UBQLN1/ATG5	4
GO:0032606	type I interferon production	15/834	115/16374	0.000730304	0.023863	0.0213697	PRKDC/DHX36/HSPD1/NPLOC4/XRCC5/G3BP1/RNF216/PCBP2/TRIM56/SETD2/TRAF3/TRIM25/CTNNB1/CYLD/RIOK3	15
GO:0043065	positive regulation of apoptotic process	30/834	315/16374	0.000750057	0.0242953	0.0217568	SQSTM1/PRKDC/HSPD1/MAP3K20/HMOX1/NSMAF/UBB/ATF4/RACK1/IFIT2/AKAP13/TP53/TRIO/GADD45A/PPID/HMGA2/DNAJA1/ITGB1/ATF6/UBC/ARHGEF2/SIAH1/RPS6/VAV3/TCTN3/DAPK3/RNPS1/CTNNB1/MTCH1/RPS27A	30
GO:0060485	mesenchyme development	7/834	31/16374	0.000778495	0.0247854	0.0221957	ACVR1/MDM2/BNC2/FGFR1/HMGA2/TGFB2/WWTR1	7
GO:0070423	nucleotide-binding oligomerization domain containing signaling pathway	7/834	31/16374	0.000778495	0.0247854	0.0221957	IRAK2/HSPA1A/UBB/MAP3K7/UBC/CYLD/RPS27A	7
GO:0002183	cytoplasmic translational initiation	6/834	23/16374	0.000820264	0.0258939	0.0231884	EIF3H/EIF3B/EIF5/EIF3K/EIF3M/EIF3A	6
GO:0016072	rRNA metabolic process	5/834	16/16374	0.000924056	0.0279846	0.0250606	USP36/WDR43/NIFK/BUD23/HEATR1	5
GO:0031396	regulation of protein ubiquitination	5/834	16/16374	0.000924056	0.0279846	0.0250606	HSP90AA1/HSPA1A/HSP90AB1/UBQLN1/UBXN2A	5
GO:0042176	regulation of protein catabolic process	5/834	16/16374	0.000924056	0.0279846	0.0250606	MDM2/XPO1/ODC1/PSMD1/UBXN2A	5
GO:0043631	RNA polyadenylation	5/834	16/16374	0.000924056	0.0279846	0.0250606	HSF1/TENT2/PNPT1/CCNT1/NUDT21	5
GO:0070841	inclusion body assembly	5/834	16/16374	0.000924056	0.0279846	0.0250606	HSF1/HSPA1A/DNAJB6/DNAJB1/DNAJA4	5
GO:0010587	miRNA catabolic process	4/834	10/16374	0.00109616	0.0326495	0.0292381	TENT2/PNPT1/SND1/PARN	4
GO:0051272	positive regulation of cellular component movement	4/834	10/16374	0.00109616	0.0326495	0.0292381	PDPN/ADAM17/ACTN4/RPS19	4
GO:0051028	mRNA transport	8/834	42/16374	0.00110439	0.0326495	0.0292381	HNRNPA3/LRPPRC/XPO1/HSF1/IWS1/RANBP17/SLBP/SETD2	8
GO:0006409	tRNA export from nucleus	7/834	33/16374	0.00115737	0.0336813	0.0301621	NUP214/RANBP2/NUP98/NUP58/NUP153/NUP107/XPOT	7
GO:0071431	tRNA-containing ribonucleoprotein complex export from nucleus	7/834	33/16374	0.00115737	0.0336813	0.0301621	NUP214/RANBP2/NUP98/NUP58/NUP153/NUP107/XPOT	7
GO:0007000	nucleolus organization	3/834	5/16374	0.00121865	0.0338768	0.0303371	USP36/RRN3/RPS19	3
GO:0034086	maintenance of sister chromatid cohesion	3/834	5/16374	0.00121865	0.0338768	0.0303371	NSMCE2/SMC5/H2AFY	3
GO:0034184	positive regulation of maintenance of mitotic sister chromatid cohesion	3/834	5/16374	0.00121865	0.0338768	0.0303371	NSMCE2/SMC5/H2AFY	3
GO:0090666	scaRNA localization to Cajal body	3/834	5/16374	0.00121865	0.0338768	0.0303371	CCT4/TCP1/CCT2	3
GO:1904358	positive regulation of telomere maintenance via telomere lengthening	3/834	5/16374	0.00121865	0.0338768	0.0303371	DHX36/HNRNPA2B1/NAF1	3
GO:1905007	positive regulation of epithelial to mesenchymal transition involved in endocardial cushion formation	3/834	5/16374	0.00121865	0.0338768	0.0303371	ACVR1/TGFB2/TGFBR2	3
GO:0032543	mitochondrial translation	15/834	121/16374	0.00124069	0.034234	0.030657	LRPPRC/MRPL50/MRPL18/PTCD3/MRPL21/UQCC1/GFM1/MRPS18C/DAP3/EARS2/FASTKD2/TRMT10C/MRPL3/MRPL33/MRPS6	15
GO:0006974	cellular response to DNA damage stimulus	29/834	311/16374	0.00126638	0.0346857	0.0310615	PRKDC/PSME4/SMCHD1/XRCC5/UBE2E2/TAF1/VCP/CDKN1A/CEBPG/TP53/THOC1/CHD2/SMC5/BRD4/MCL1/USP16/PARG/HMGA2/BCL2L1/TPT1/WRN/ATR/ASCC3/UBE2B/VAV3/MAPKAPK2/OGG1/EYA3/BOD1L1	29
GO:0000422	autophagy of mitochondrion	8/834	43/16374	0.00129722	0.0352711	0.0315858	SQSTM1/USP36/CTTN/MAP1LC3B/VDAC1/TP53/AMBRA1/FBXW7	8
GO:0071427	mRNA-containing ribonucleoprotein complex export from nucleus	13/834	99/16374	0.00151512	0.0408972	0.036624	SMG6/NUP214/RANBP2/NUP98/THOC1/HNRNPA2B1/NUP58/MAGOH/SLBP/NUP153/NUP107/CASC3/RNPS1	13
GO:0016236	macroautophagy	21/834	202/16374	0.00153148	0.0410415	0.0367533	SQSTM1/USP36/HMOX1/MAP1LC3B/RPTOR/VDAC1/DYNLL1/SESN2/VCP/TOMM40/AMBRA1/RHEB/UBQLN1/MAP3K7/ATG5/EXOC1/CSNK2A1/PIK3R4/RRAGD/STAM/LAMTOR1	21
GO:0034612	response to tumor necrosis factor	16/834	137/16374	0.00164033	0.0431316	0.0386249	CHI3L1/PSME4/ADAM17/PSMD1/PSMA7/NFKBIA/ACTN4/TMSB4X/PSMD14/PSMB4/PSMB1/ADAM9/TRAF3/PSMD12/PSMB7/PSMD5	16
GO:0009048	dosage compensation by inactivation of X chromosome	4/834	11/16374	0.0016534	0.0431316	0.0386249	SMCHD1/EIF1/LRIF1/HNRNPU	4
GO:2001171	positive regulation of ATP biosynthetic process	4/834	11/16374	0.0016534	0.0431316	0.0386249	STAT3/VCP/TMSB4X/ENO1	4
GO:0000079	regulation of cyclin-dependent protein serine/threonine kinase activity	7/834	35/16374	0.00166737	0.0431316	0.0386249	GTPBP4/BCCIP/CDKN1A/GADD45A/ACTB/CCNT1/CCNL1	7
GO:2001237	negative regulation of extrinsic apoptotic signaling pathway	7/834	35/16374	0.00166737	0.0431316	0.0386249	BIRC6/ACVR1/CTTN/SH3RF1/GCLM/GSTP1/SCG2	7
GO:0070936	protein K48-linked ubiquitination	9/834	55/16374	0.00170316	0.0437536	0.039182	TRIM44/UBE2D3/UBE2E2/RNF216/UBE2G2/UBE3A/ARIH2/UBE2B/RNF4	9
GO:0097193	intrinsic apoptotic signaling pathway	17/834	153/16374	0.00205422	0.0524108	0.0469346	MDM2/HSPA1A/HSPB1/UBB/RACK1/CDKN1A/TP53/RPS7/DNAJA1/RRN3/BCL2L1/TPT1/UBQLN1/ENO1/ARHGEF2/SIAH1/CYLD	17
GO:0019068	virion assembly	5/834	19/16374	0.00216579	0.0541446	0.0484873	UBB/RAB1A/UBC/PPIA/RPS27A	5
GO:0034389	lipid droplet organization	5/834	19/16374	0.00216579	0.0541446	0.0484873	PPID/FAF2/SPART/RAB18/PPIA	5
GO:0070987	error-free translesion synthesis	5/834	19/16374	0.00216579	0.0541446	0.0484873	NPLOC4/UBB/VCP/UBC/RPS27A	5
GO:0006607	NLS-bearing protein import into nucleus	3/834	6/16374	0.002345	0.0570016	0.0510457	RANBP2/IPO5/KPNA4	3
GO:0051223	regulation of protein transport	3/834	6/16374	0.002345	0.0570016	0.0510457	DNAJA1/SLC7A11/GAPVD1	3
GO:1903026	negative regulation of RNA polymerase II regulatory region sequence-specific DNA binding	3/834	6/16374	0.002345	0.0570016	0.0510457	TAF1/TMSB4X/FBXW7	3
GO:0035722	interleukin-12-mediated signaling pathway	8/834	47/16374	0.00235122	0.0570016	0.0510457	HSPA9/ARF1/HNRNPF/ANXA2/HNRNPA2B1/TCP1/PITPNA/PPIA	8
GO:1901990	regulation of mitotic cell cycle phase transition	11/834	80/16374	0.00235658	0.0570016	0.0510457	PSME4/PSMD1/PSMA7/PSMD14/PSMB4/PSMB1/SKP1/ANAPC1/PSMD12/PSMB7/PSMD5	11
GO:0045943	positive regulation of transcription by RNA polymerase I	4/834	12/16374	0.00238074	0.0572146	0.0512365	WDR43/TAF1/ATF4/HEATR1	4
GO:0030970	retrograde protein transport, ER to cytosol	6/834	28/16374	0.00246295	0.0585995	0.0524766	NPLOC4/VCP/HM13/SEC61B/FAF2/UBE2G2	6
GO:0072331	signal transduction by p53 class mediator	18/834	169/16374	0.00246983	0.0585995	0.0524766	CD44/MDM2/RBBP8/TAF1/UBB/TAF15/TP53/TAF7/RPS7/RRN3/DYRK3/RPL23/WRN/ATR/CSNK2A1/RBBP7/SPRED1/TRIM24	18
GO:0030330	DNA damage response, signal transduction by p53 class mediator	8/834	48/16374	0.00269799	0.0632076	0.0566033	CD44/MDM2/SESN2/TP53/DYRK3/ATR/SPRED1/RPL26	8
GO:0070671	response to interleukin-12	8/834	48/16374	0.00269799	0.0632076	0.0566033	HSPA9/ARF1/HNRNPF/ANXA2/HNRNPA2B1/TCP1/PITPNA/PPIA	8
GO:0032781	positive regulation of ATPase activity	7/834	38/16374	0.00274075	0.0632571	0.0566476	DNAJB6/DNAJB1/NAPA/DNAJA1/ATP1B3/AHSA1/DNAJC10	7
GO:0006414	translational elongation	5/834	20/16374	0.00276803	0.0632571	0.0566476	USP16/EEF1A1/EEF1D/RPLP2/HBS1L	5
GO:0046827	positive regulation of protein export from nucleus	5/834	20/16374	0.00276803	0.0632571	0.0566476	MDM2/BAG3/TP53/XPO4/CTDSPL2	5
GO:0070584	mitochondrion morphogenesis	5/834	20/16374	0.00276803	0.0632571	0.0566476	PNPT1/BCL2L1/OPA3/NDUFS6/SSBP1	5
GO:0044706	multi-multicellular organism process	11/834	82/16374	0.00287285	0.0652521	0.0584342	SERPINE2/VMP1/FKBP4/HSF1/SPP1/APOL2/RPL29/ANGPT2/KPNA6/PCSK5/TGFBR2	11
GO:0071230	cellular response to amino acid stimulus	8/834	49/16374	0.00308342	0.0691912	0.0619617	LARS/RPTOR/CAPN2/SESN2/IPO5/BCL2L1/RRAGD/LAMTOR1	8
GO:0071349	cellular response to interleukin-12	8/834	49/16374	0.00308342	0.0691912	0.0619617	HSPA9/ARF1/HNRNPF/ANXA2/HNRNPA2B1/TCP1/PITPNA/PPIA	8
GO:0000186	activation of MAPKK activity	7/834	39/16374	0.00319616	0.0712916	0.0638427	MAP3K20/RAPGEF1/MAP3K7/RAF1/ADAM9/CRK/MAP3K4	7
GO:0071850	mitotic cell cycle arrest	4/834	13/16374	0.00330134	0.0731992	0.0655509	CDKN1A/TP53/GADD45A/PNPT1	4
GO:0048255	mRNA stabilization	5/834	21/16374	0.00348268	0.0767631	0.0687424	HNRNPU/NOCT/ELAVL1/PABPC1/TENT4A	5
GO:0006281	DNA repair	27/834	304/16374	0.00362204	0.0793653	0.0710727	PSME4/RBBP8/SMCHD1/UBE2D3/BCCIP/HSF1/UBB/VCP/MORF4L2/RAD51B/CEBPG/GADD45A/MUS81/NPM1/PPP5C/WRN/UBC/ATR/ASCC3/UBE2B/OGG1/EYA3/BACH1/CCNH/MBD4/BOD1L1/RPS27A	27
GO:0042770	signal transduction in response to DNA damage	7/834	40/16374	0.00370713	0.0807548	0.072317	CD44/MDM2/TP53/GADD45A/DYRK3/ATR/SPRED1	7
GO:0071559	response to transforming growth factor beta	12/834	97/16374	0.00374523	0.0811104	0.0726355	ACVR1/GDF15/UBB/TP53/ROCK2/MAP3K7/UBC/ADAM9/TGFB2/TGFBR2/RPS27A/SMAD5	12
GO:0019054	modulation by virus of host cellular process	3/834	7/16374	0.00394875	0.0833235	0.0746174	KPNB1/KPNA1/KPNA4	3
GO:0034502	protein localization to chromosome	3/834	7/16374	0.00394875	0.0833235	0.0746174	H2AFY/SETD2/GNL3	3
GO:0044806	G-quadruplex DNA unwinding	3/834	7/16374	0.00394875	0.0833235	0.0746174	DHX36/HNRNPA2B1/WRN	3
GO:0090398	cellular senescence	9/834	62/16374	0.00395954	0.0833235	0.0746174	NAMPT/PRKDC/CDKN1A/NSMCE2/TP53/SMC5/PNPT1/HMGA2/NEK6	9
GO:0006417	regulation of translation	8/834	51/16374	0.00398163	0.0833235	0.0746174	MKNK2/PTCD3/RPL10/RBM3/MAGOH/GCN1/CASC3/RPL38	8
GO:0072332	intrinsic apoptotic signaling pathway by p53 class mediator	8/834	51/16374	0.00398163	0.0833235	0.0746174	CD44/MDM2/UBB/TP53/RPS7/HINT1/RRN3/RPL26	8
GO:1903047	mitotic cell cycle process	24/834	263/16374	0.0041999	0.0874001	0.078268	PSME4/KPNB1/BCCIP/NAA50/PSMD1/PSMA7/NSMCE2/SMC5/HNRNPU/H2AFY/PSMD14/PSMB4/PSMB1/SKP1/CEP192/ANAPC1/TENT4A/RPL24/DAPK3/ZNF207/PSMD12/PSMB7/FLNA/PSMD5	24
GO:0000381	regulation of alternative mRNA splicing, via spliceosome	7/834	41/16374	0.00427784	0.0885275	0.0792776	WTAP/RBM25/HNRNPU/MAGOH/HNRNPL/NSRP1/RNPS1	7
GO:0061912	selective autophagy	5/834	22/16374	0.00432072	0.0889209	0.0796299	SQSTM1/BAG3/SESN2/TP53/SPTLC1	5
GO:0046034	ATP metabolic process	9/834	63/16374	0.00441576	0.0893475	0.080012	HSPA1A/GUK1/STAT3/VCP/SLC25A33/HSPA8/TMSB4X/ENO1/FAM20C	9
GO:0009152	purine ribonucleotide biosynthetic process	4/834	14/16374	0.00443739	0.0893475	0.080012	STAT3/VCP/TMSB4X/ENO1	4
GO:0009206	purine ribonucleoside triphosphate biosynthetic process	4/834	14/16374	0.00443739	0.0893475	0.080012	STAT3/VCP/TMSB4X/ENO1	4
GO:1902570	protein localization to nucleolus	4/834	14/16374	0.00443739	0.0893475	0.080012	POLR1A/GLUL/WRN/NOL8	4
GO:0034644	cellular response to UV	8/834	52/16374	0.00450027	0.0901263	0.0807094	DHX36/TAF1/ATF4/TP53/NPM1/EIF2S1/ATR/RPL26	8
GO:0002223	stimulatory C-type lectin receptor signaling pathway	13/834	112/16374	0.00454868	0.0906087	0.0811414	PSME4/FBXW11/PSMD1/PSMA7/PSMD14/PSMB4/MAP3K7/RAF1/PSMB1/SKP1/PSMD12/PSMB7/PSMD5	13
GO:0007179	transforming growth factor beta receptor signaling pathway	17/834	166/16374	0.004799	0.0950866	0.0851513	ACVR1/CHST11/GDF15/HSPA1A/ADAM17/UBB/STRAP/TP53/HSP90AB1/MAP3K7/UBC/ADAM9/TGFB2/TGFBR2/SDCBP/RPS27A/SMAD5	17
GO:0022402	cell cycle process	21/834	223/16374	0.00499445	0.0984355	0.0881504	MDM2/CHORDC1/XPO1/RBBP8/SLC25A33/TP53/ROCK2/NPM1/HMGA2/HSP90AB1/RPL23/SND1/CEP192/MGA/CSNK2A1/ZNF207/WAPL/GEM/RBBP7/RPRD1B/CTNNB1	21
GO:0043154	negative regulation of cysteine-type endopeptidase activity involved in apoptotic process	9/834	65/16374	0.00545025	0.106854	0.0956888	CRYAB/CD44/MDM2/SH3RF1/DNAJB6/POR/RAF1/CSNK2A1/RPS6KA3	9
GO:0050714	positive regulation of protein secretion	7/834	43/16374	0.00561551	0.109517	0.0980741	ARF1/VEGFC/PPID/ADAM9/EXOC1/TGFB2/PPIA	7
GO:0000380	alternative mRNA splicing, via spliceosome	8/834	54/16374	0.00569163	0.110287	0.0987637	WTAP/SFSWAP/RBM25/HNRNPU/MAGOH/HNRNPL/NSRP1/RNPS1	8
GO:0000002	mitochondrial genome maintenance	4/834	15/16374	0.00580993	0.110287	0.0987637	LONP1/SESN2/MEF2A/SLC25A33	4
GO:0034470	ncRNA processing	4/834	15/16374	0.00580993	0.110287	0.0987637	USP36/WDR43/BUD23/HEATR1	4
GO:0070935	3'-UTR-mediated mRNA stabilization	4/834	15/16374	0.00580993	0.110287	0.0987637	HNRNPC/ELAVL1/TENT4A/MAPKAPK2	4
GO:0045815	positive regulation of gene expression, epigenetic	6/834	33/16374	0.00583264	0.110287	0.0987637	DDX21/TAF1D/POLR1A/H2AFY/ACTB/CTNNB1	6
GO:1901998	toxin transport	6/834	33/16374	0.00583264	0.110287	0.0987637	CCT4/CCT3/CCT5/COPB2/TCP1/CCT2	6
GO:0043687	post-translational protein modification	29/834	346/16374	0.00595612	0.112053	0.100345	SPSB1/PSME4/RNF7/EPAS1/SPP1/PTP4A2/FBXW11/PRSS23/PSMD1/PSMA7/LRRC41/LAMC1/PSMD14/RAB1A/PSMB4/ATG5/PSMB1/SKP1/KLHL42/FEM1C/SCG2/RBBP7/PSMD12/DCAF7/KLHL21/PSMB7/FAM20C/PSMD5/FBXW7	29
GO:0030512	negative regulation of transforming growth factor beta receptor signaling pathway	9/834	66/16374	0.00603309	0.112119	0.100404	CHST11/HSPA1A/ADAM17/UBB/STRAP/TP53/UBC/TGFBR2/RPS27A	9
GO:0001959	regulation of cytokine-mediated signaling pathway	3/834	8/16374	0.00608	0.112119	0.100404	CBFB/IRAK2/RUNX1	3
GO:0010564	regulation of cell cycle process	3/834	8/16374	0.00608	0.112119	0.100404	HMGA2/SND1/RPRD1B	3
GO:0047497	mitochondrion transport along microtubule	3/834	8/16374	0.00608	0.112119	0.100404	LRPPRC/UBB/MAP1B	3
GO:0002446	neutrophil mediated immunity	38/834	488/16374	0.00621909	0.114119	0.102195	CHI3L1/FTL/CD44/FTH1/HSP90AA1/KPNB1/XRCC5/HSPA1A/ADAM17/MGST1/CD63/DYNLL1/HSPA6/VCP/PSMD1/ANXA2/RAB31/HSPA8/EEF1A1/HSP90AB1/PSMD14/FAF2/PRDX6/SRP14/PSMB1/ATP11A/BRI3/RAB18/GSTP1/KCMF1/PSMD12/CYSTM1/PPIA/SDCBP/CCT2/NFASC/PSMB7/LAMTOR1	38
GO:0018105	peptidyl-serine phosphorylation	20/834	213/16374	0.00624995	0.114123	0.102199	CAMK2D/CD44/PRKDC/MAPKAP1/HSP90AA1/TXN/TAF1/RPTOR/RACK1/ROCK2/HSP90AB1/RAF1/ATR/NEK6/CSNK2A1/RPS6KA3/MAPKAPK2/FNIP2/PAQR3/TGFBR2	20
GO:0016055	Wnt signaling pathway	33/834	410/16374	0.00643094	0.116089	0.103959	PSME4/SULF2/RAPGEF1/CBFB/CCNY/MBD2/G3BP1/UBB/RACK1/VCP/FBXW11/PSMD1/PSMA7/DIXDC1/PSMD14/PSMB4/OTULIN/PSMB1/SKP1/UBC/UBE2B/RUNX1/CSNK2A1/SNX3/DAPK3/IFT20/PSMD12/CTNNB1/WWTR1/CYLD/PSMB7/RPS27A/PSMD5	33
GO:0035195	gene silencing by miRNA	14/834	130/16374	0.00646063	0.116089	0.103959	NEAT1/NUP214/STAT3/RANBP2/NUP98/NUP58/ADAR/NUP153/XPO5/FXR1/MIR34AHG/ELAVL1/NUP107/POLR2B	14
GO:0006810	transport	13/834	117/16374	0.00657519	0.116089	0.103959	CRYAB/EEA1/ARF1/ACTG1/STAT3/ANXA2/TP53/BCL2L1/ACTB/ACSL3/WWC1/VAV3/MAP1B	13
GO:0034976	response to endoplasmic reticulum stress	13/834	117/16374	0.00657519	0.116089	0.103959	NPLOC4/TNFRSF10B/HSPA1A/FAM129A/ATF4/RACK1/VCP/SEC61B/FAF2/BCL2L1/UBQLN1/EIF2S1/DNAJC10	13
GO:0035194	post-transcriptional gene silencing by RNA	13/834	117/16374	0.00657519	0.116089	0.103959	NEAT1/NUP214/STAT3/RANBP2/NUP98/NUP58/ADAR/NUP153/XPO5/FXR1/ELAVL1/NUP107/POLR2B	13
GO:0006368	transcription elongation from RNA polymerase II promoter	10/834	79/16374	0.00664454	0.116089	0.103959	ELL2/IWS1/HNRNPU/BRD4/CCNT1/SETD2/POLR2B/GTF2F2/CCNH/EAPP	10
GO:0010259	multicellular organism aging	6/834	34/16374	0.00678372	0.116089	0.103959	CRYAB/TP53/WRN/NDUFS6/PRDM2/SERP1	6
GO:0061024	membrane organization	17/834	173/16374	0.00722191	0.116089	0.103959	MYOF/CTTN/ACTG1/UBB/LDLR/RER1/HSPA8/ACTB/ETV5/UBC/GAPVD1/GAK/CLTC/YWHAZ/YWHAG/RPS27A/STAM	17
GO:0019538	protein metabolic process	20/834	216/16374	0.00726824	0.116089	0.103959	SERPINE2/CRYAB/MDM2/XPO1/LDLR/ODC1/VCP/FBXW11/PSMD1/TP53/NFKBIA/ROCK2/HSP90AB1/RAB1A/TRAF3/CSNK2A1/SF3B3/SNX3/FLNA/UBXN2A	20
GO:0051603	proteolysis involved in cellular protein catabolic process	9/834	68/16374	0.00734167	0.116089	0.103959	MDM2/LONP1/UBB/CAPN2/HSP90AB1/PSMD14/CTSL/USP14/FBXW7	9
GO:0051403	stress-activated MAPK cascade	19/834	202/16374	0.0074364	0.116089	0.103959	CRYAB/MAP4K5/MAP3K20/RAPGEF1/SH3RF1/PJA2/UBB/FBXW11/TPD52L1/GADD45A/MAP3K7/SKP1/UBC/GSTP1/TGFB2/SDCBP/CYLD/MAP3K4/RPS27A	19
GO:0006891	intra-Golgi vesicle-mediated transport	4/834	16/16374	0.00743856	0.116089	0.103959	COG5/NAPA/COPB2/GOLGA3	4
GO:0042326	negative regulation of phosphorylation	4/834	16/16374	0.00743856	0.116089	0.103959	DYNLL1/CDKN1A/PRKRIP1/ANKLE2	4
GO:0061684	chaperone-mediated autophagy	4/834	16/16374	0.00743856	0.116089	0.103959	HSP90AA1/BAG3/HSPA8/EEF1A1	4
GO:0062197	cellular response to chemical stress	4/834	16/16374	0.00743856	0.116089	0.103959	MAPKAP1/HMOX1/EPAS1/TP53	4
GO:1903146	regulation of autophagy of mitochondrion	4/834	16/16374	0.00743856	0.116089	0.103959	USP36/CTTN/VDAC1/FBXW7	4
GO:2000059	negative regulation of ubiquitin-dependent protein catabolic process	4/834	16/16374	0.00743856	0.116089	0.103959	TAF1/RPS7/RPL23/CSNK2A1	4
GO:0000957	mitochondrial RNA catabolic process	2/834	3/16374	0.00751071	0.116089	0.103959	LRPPRC/PNPT1	2
GO:0009452	7-methylguanosine RNA capping	2/834	3/16374	0.00751071	0.116089	0.103959	TGS1/RNMT	2
GO:0016259	selenocysteine metabolic process	2/834	3/16374	0.00751071	0.116089	0.103959	SARS/SEPHS2	2
GO:0021932	hindbrain radial glia guided cell migration	2/834	3/16374	0.00751071	0.116089	0.103959	ITGB1/FLNA	2
GO:0021943	formation of radial glial scaffolds	2/834	3/16374	0.00751071	0.116089	0.103959	ITGB1/FLNA	2
GO:0030947	regulation of vascular endothelial growth factor receptor signaling pathway	2/834	3/16374	0.00751071	0.116089	0.103959	MYOF/VEGFC	2
GO:0033128	negative regulation of histone phosphorylation	2/834	3/16374	0.00751071	0.116089	0.103959	H2AFY/UBE2B	2
GO:0034661	ncRNA catabolic process	2/834	3/16374	0.00751071	0.116089	0.103959	TENT2/PNPT1	2
GO:0035928	rRNA import into mitochondrion	2/834	3/16374	0.00751071	0.116089	0.103959	MRPL18/PNPT1	2
GO:0036369	transcription factor catabolic process	2/834	3/16374	0.00751071	0.116089	0.103959	MDM2/TAF1	2
GO:0042998	positive regulation of Golgi to plasma membrane protein transport	2/834	3/16374	0.00751071	0.116089	0.103959	RACK1/ACSL3	2
GO:0051088	PMA-inducible membrane protein ectodomain proteolysis	2/834	3/16374	0.00751071	0.116089	0.103959	ADAM17/ADAM9	2
GO:0051248	negative regulation of protein metabolic process	2/834	3/16374	0.00751071	0.116089	0.103959	LDLR/HSP90AB1	2
GO:0070370	cellular heat acclimation	2/834	3/16374	0.00751071	0.116089	0.103959	HSPA1A/RBBP7	2
GO:1902751	positive regulation of cell cycle G2/M phase transition	2/834	3/16374	0.00751071	0.116089	0.103959	NPM1/DYRK3	2
GO:1903843	cellular response to arsenite ion	2/834	3/16374	0.00751071	0.116089	0.103959	DHX36/VCP	2
GO:1990108	protein linear deubiquitination	2/834	3/16374	0.00751071	0.116089	0.103959	OTULIN/CYLD	2
GO:1990737	response to manganese-induced endoplasmic reticulum stress	2/834	3/16374	0.00751071	0.116089	0.103959	ATF4/EIF2S1	2
GO:2000392	regulation of lamellipodium morphogenesis	2/834	3/16374	0.00751071	0.116089	0.103959	CD44/PDPN	2
GO:2001247	positive regulation of phosphatidylcholine biosynthetic process	2/834	3/16374	0.00751071	0.116089	0.103959	CAPN2/ACSL3	2
GO:0000375	RNA splicing, via transesterification reactions	5/834	25/16374	0.00768331	0.118266	0.105909	PRPF3/PRPF8/PRPF6/SCAF11/SF3B3	5
GO:0032508	DNA duplex unwinding	7/834	46/16374	0.00817762	0.125357	0.112259	DHX36/XRCC5/G3BP1/CHD1/CHD2/WRN/ASCC3	7
GO:0006839	mitochondrial transport	10/834	82/16374	0.00861236	0.131308	0.117588	HSP90AA1/USP36/BAG3/UBE2D3/STAT3/HSPA4/TP53/BCL2L1/ARIH2/FBXW7	10
GO:0031571	mitotic G1 DNA damage checkpoint	3/834	9/16374	0.00877737	0.131308	0.117588	PRKDC/RPS27L/TP53	3
GO:0034088	maintenance of mitotic sister chromatid cohesion	3/834	9/16374	0.00877737	0.131308	0.117588	NSMCE2/SMC5/H2AFY	3
GO:0051292	nuclear pore complex assembly	3/834	9/16374	0.00877737	0.131308	0.117588	NUP98/NUP153/NUP107	3
GO:0098974	postsynaptic actin cytoskeleton organization	3/834	9/16374	0.00877737	0.131308	0.117588	ARF1/ACTG1/ACTB	3
GO:2000234	positive regulation of rRNA processing	3/834	9/16374	0.00877737	0.131308	0.117588	WDR43/BUD23/HEATR1	3
GO:0071363	cellular response to growth factor stimulus	24/834	280/16374	0.00898022	0.132729	0.118861	ACVR1/MDM2/RAPGEF1/UBE2D3/GDF15/UBB/FGFR1/RACK1/HNRNPF/TP53/MAP3K7/UBC/ANGPT2/ADAM9/MAP1B/POLR2B/TGFB2/GTF2F2/TGFBR2/CTNNB1/SPRED1/RPS27A/SMAD5/NRP2	24
GO:0032465	regulation of cytokinesis	6/834	36/16374	0.00901467	0.132729	0.118861	BIRC6/BCL2L1/SETD2/PRPF40A/PIK3R4/KLHL21	6
GO:0071479	cellular response to ionizing radiation	6/834	36/16374	0.00901467	0.132729	0.118861	NAMPT/CDKN1A/TP53/GADD45A/HMGA2/EEF1D	6
GO:0043312	neutrophil degranulation	37/834	484/16374	0.00912	0.132729	0.118861	CHI3L1/FTL/CD44/FTH1/HSP90AA1/KPNB1/XRCC5/HSPA1A/MGST1/CD63/DYNLL1/HSPA6/VCP/PSMD1/ANXA2/RAB31/HSPA8/EEF1A1/HSP90AB1/PSMD14/FAF2/PRDX6/SRP14/PSMB1/ATP11A/BRI3/RAB18/GSTP1/KCMF1/PSMD12/CYSTM1/PPIA/SDCBP/CCT2/NFASC/PSMB7/LAMTOR1	37
GO:0000387	spliceosomal snRNP assembly	5/834	26/16374	0.00912179	0.132729	0.118861	SNRPD1/STRAP/SNRPG/TGS1/SNRPD3	5
GO:0007062	sister chromatid cohesion	5/834	26/16374	0.00912179	0.132729	0.118861	NAA50/SMC5/TENT4A/WAPL/FBXW7	5
GO:0045070	positive regulation of viral genome replication	5/834	26/16374	0.00912179	0.132729	0.118861	RAD23A/PPID/ADAR/PABPC1/PPIA	5
GO:0006978	DNA damage response, signal transduction by p53 class mediator resulting in transcription of p21 class mediator	4/834	17/16374	0.00934131	0.134083	0.120073	RPS27L/CDKN1A/TP53/RPL26	4
GO:0042255	ribosome assembly	4/834	17/16374	0.00934131	0.134083	0.120073	MRTO4/NPM1/RPS19/FASTKD2	4
GO:0045616	regulation of keratinocyte differentiation	4/834	17/16374	0.00934131	0.134083	0.120073	CBFB/ROCK2/CTSL/RUNX1	4
GO:0006626	protein targeting to mitochondrion	10/834	83/16374	0.00935883	0.134083	0.120073	HSP90AA1/USP36/BAG3/UBE2D3/TIMM44/TOMM40/HSPA4/TIMM23/ARIH2/FBXW7	10
GO:0006606	protein import into nucleus	11/834	96/16374	0.00953489	0.136082	0.121863	KPNB1/BAG3/STAT3/CDKN1A/IPO5/TP53/NFKBIA/RANBP17/NUP58/TNPO3/FLNA	11
GO:0002262	myeloid cell homeostasis	8/834	59/16374	0.00971392	0.138108	0.123678	HSPA9/EPAS1/ANXA1/DYRK3/ADAR/RPS19/SMAD5/MERTK	8
GO:1901565	organonitrogen compound catabolic process	12/834	110/16374	0.0101623	0.143934	0.128895	SERPINE2/MDM2/XPO1/LDLR/ODC1/VCP/PSMD1/CSNK2A1/SF3B3/SNX3/FLNA/UBXN2A	12
GO:0001503	ossification	21/834	238/16374	0.0102508	0.144339	0.129258	HSPE1/IARS/ACVR1/DHX36/DDX21/CBFB/GTPBP4/TMEM38B/HNRNPC/SNRNP200/HNRNPU/SBNO2/DDR2/ADAR/SND1/RPS15/CLTC/CHSY1/TGFB2/RPL38/WWTR1	21
GO:0002755	MyD88-dependent toll-like receptor signaling pathway	6/834	37/16374	0.0103072	0.144339	0.129258	HSPD1/IRAK2/UBB/MAP3K7/UBC/RPS27A	6
GO:0010658	striated muscle cell apoptotic process	6/834	37/16374	0.0103072	0.144339	0.129258	CAMK2D/BAG3/HSF1/CAPN2/TP53/AMBRA1	6
GO:0071356	cellular response to tumor necrosis factor	19/834	209/16374	0.0105256	0.146846	0.131503	CHI3L1/PSME4/ADAM17/GBP2/PSMD1/PSMA7/NFKBIA/ACTN4/PRPF8/TMSB4X/PSMD14/PSMB4/PSMB1/ARHGEF2/TRAF3/ZFAND6/PSMD12/PSMB7/PSMD5	19
GO:0060411	cardiac septum morphogenesis	5/834	27/16374	0.0107356	0.149217	0.133626	MDM2/TP53/TGFB2/TGFBR2/CHD7	5
GO:0006888	endoplasmic reticulum to Golgi vesicle-mediated transport	15/834	153/16374	0.0114156	0.157964	0.141459	SEC31A/ARF1/VTI1A/CAPZB/COG5/DYNLL1/VCP/NAPA/RAB1A/ARFGAP3/COPB2/COPA/DCTN5/TRAPPC11/STX18	15
GO:0055007	cardiac muscle cell differentiation	7/834	49/16374	0.0115108	0.157964	0.141459	ACVR1/CACYBP/AKAP13/HNRNPU/ITGB1/ATG5/IFT20	7
GO:0003181	atrioventricular valve morphogenesis	4/834	18/16374	0.0115346	0.157964	0.141459	ACVR1/MDM2/TGFB2/TGFBR2	4
GO:0008156	negative regulation of DNA replication	4/834	18/16374	0.0115346	0.157964	0.141459	GTPBP4/TP53/ATR/WAPL	4
GO:0010659	cardiac muscle cell apoptotic process	6/834	38/16374	0.0117259	0.15877	0.142181	CAMK2D/HSF1/CAPN2/TP53/AMBRA1/GNB1	6
GO:0038202	TORC1 signaling	6/834	38/16374	0.0117259	0.15877	0.142181	LARS/RPTOR/SESN2/DYRK3/FNIP2/RRAGD	6
GO:0042149	cellular response to glucose starvation	6/834	38/16374	0.0117259	0.15877	0.142181	ATF4/SESN2/TP53/UPP1/ASNS/PIK3R4	6
GO:0045669	positive regulation of osteoblast differentiation	8/834	61/16374	0.0118065	0.15877	0.142181	ACVR1/IL6R/FBN2/DDR2/CEBPD/CTNNB1/SMAD5/FAM20C	8
GO:0097192	extrinsic apoptotic signaling pathway in absence of ligand	8/834	61/16374	0.0118065	0.15877	0.142181	BAG3/MKNK2/HSPA1A/FGFR1/MCL1/BCL2L1/STRADB/DAPK3	8
GO:0006928	movement of cell or subcellular component	10/834	86/16374	0.0118965	0.158834	0.142238	PDPN/ADAM17/ROCK2/ACTN4/ABL2/RAF1/RPS19/CRK/DAPK3/NRP2	10
GO:0070125	mitochondrial translational elongation	10/834	86/16374	0.0118965	0.158834	0.142238	MRPL50/MRPL18/PTCD3/MRPL21/GFM1/MRPS18C/DAP3/MRPL3/MRPL33/MRPS6	10
GO:0009651	response to salt stress	3/834	10/16374	0.0120693	0.158863	0.142264	TP53/HSP90AB1/ANXA7	3
GO:0048660	regulation of smooth muscle cell proliferation	3/834	10/16374	0.0120693	0.158863	0.142264	PRKDC/XRCC5/CTNNB1	3
GO:0061635	regulation of protein complex stability	3/834	10/16374	0.0120693	0.158863	0.142264	SQSTM1/HSPA8/TRAPPC11	3
GO:0075522	IRES-dependent viral translational initiation	3/834	10/16374	0.0120693	0.158863	0.142264	EIF3B/PCBP2/EIF3A	3
GO:0002444	myeloid leukocyte mediated immunity	37/834	494/16374	0.0123522	0.162014	0.145085	CHI3L1/FTL/CD44/FTH1/HSP90AA1/KPNB1/XRCC5/HSPA1A/MGST1/CD63/DYNLL1/HSPA6/VCP/PSMD1/ANXA2/RAB31/HSPA8/EEF1A1/HSP90AB1/PSMD14/FAF2/PRDX6/SRP14/PSMB1/ATP11A/BRI3/RAB18/GSTP1/KCMF1/PSMD12/CYSTM1/PPIA/SDCBP/CCT2/NFASC/PSMB7/LAMTOR1	37
GO:0070979	protein K11-linked ubiquitination	5/834	28/16374	0.012534	0.163312	0.146249	UBE2D3/UBE2E2/UBE2B/ANAPC1/RNF4	5
GO:0010498	proteasomal protein catabolic process	16/834	169/16374	0.0125745	0.163312	0.146249	MDM2/NPLOC4/TAF1/HSPA1A/UBB/RAD23A/RACK1/VCP/SEC61B/HSP90AB1/PSMD14/FAF2/SENP1/USP14/SDCBP/FBXW7	16
GO:0002479	antigen processing and presentation of exogenous peptide antigen via MHC class I, TAP-dependent	9/834	74/16374	0.0125827	0.163312	0.146249	PSME4/PSMD1/PSMA7/PSMD14/PSMB4/PSMB1/PSMD12/PSMB7/PSMD5	9
GO:0006405	RNA export from nucleus	7/834	50/16374	0.0128132	0.165726	0.14841	IWS1/THOC1/MAGOH/NUP153/SETD2/CASC3/RNPS1	7
GO:0071310	cellular response to organic substance	24/834	289/16374	0.0129177	0.165977	0.148634	VIM/HSP90AA1/RAPGEF1/HMOX1/IL1R1/UBB/IL6R/STAT3/ANXA1/IL1RAP/CDKN1A/TP53/HSPA8/MCL1/BCL2L1/ITGB1/CEBPD/UBC/GAB2/CRK/YWHAZ/ZC3H15/SATB2/RPS27A	24
GO:0007566	embryo implantation	6/834	39/16374	0.0132767	0.165977	0.148634	VMP1/FKBP4/SPP1/RPL29/PCSK5/TGFBR2	6
GO:0010243	response to organonitrogen compound	6/834	39/16374	0.0132767	0.165977	0.148634	NPLOC4/MGST1/VCP/CDKN1A/SEC61B/FAF2	6
GO:0006469	negative regulation of protein kinase activity	9/834	75/16374	0.0136734	0.165977	0.148634	WARS/HSPB1/TAF7/GADD45A/PRKRIP1/GSTP1/YWHAG/SPRED1/WWTR1	9
GO:0048010	vascular endothelial growth factor receptor signaling pathway	10/834	88/16374	0.0138561	0.165977	0.148634	HSP90AA1/MYOF/VEGFC/ROCK2/BCAR1/VAV3/BAIAP2/MAPKAPK2/CRK/NRP2	10
GO:0003171	atrioventricular valve development	4/834	19/16374	0.0140329	0.165977	0.148634	ACVR1/MDM2/TGFB2/TGFBR2	4
GO:0006893	Golgi to plasma membrane transport	4/834	19/16374	0.0140329	0.165977	0.148634	RACK1/CCDC93/ACSL3/RABEP1	4
GO:0051641	cellular localization	4/834	19/16374	0.0140329	0.165977	0.148634	CAMK2D/CRYAB/WWC1/MAP1B	4
GO:0042542	response to hydrogen peroxide	7/834	51/16374	0.0142182	0.165977	0.148634	CRYAB/HMOX1/CAPN2/UBE3A/ADAM9/CRK/KPNA4	7
GO:0030168	platelet activation	14/834	143/16374	0.0143814	0.165977	0.148634	PDPN/HSPB1/ACTG1/GNB1/ACTB/RAF1/SLC7A11/PLSCR1/VAV3/YWHAZ/DGKE/DGKD/FLNA/MERTK	14
GO:0000028	ribosomal small subunit assembly	2/834	4/16374	0.0145147	0.165977	0.148634	RPS19/RPL38	2
GO:0000055	ribosomal large subunit export from nucleus	2/834	4/16374	0.0145147	0.165977	0.148634	XPO1/SDAD1	2
GO:0000056	ribosomal small subunit export from nucleus	2/834	4/16374	0.0145147	0.165977	0.148634	XPO1/RPS15	2
GO:0002051	osteoblast fate commitment	2/834	4/16374	0.0145147	0.165977	0.148634	SH3PXD2B/SMAD5	2
GO:0003433	chondrocyte development involved in endochondral bone morphogenesis	2/834	4/16374	0.0145147	0.165977	0.148634	SERPINH1/TGFBR2	2
GO:0006556	S-adenosylmethionine biosynthetic process	2/834	4/16374	0.0145147	0.165977	0.148634	MAT2A/METTL16	2
GO:0007023	post-chaperonin tubulin folding pathway	2/834	4/16374	0.0145147	0.165977	0.148634	TBCA/TBCD	2
GO:0010793	regulation of mRNA export from nucleus	2/834	4/16374	0.0145147	0.165977	0.148634	IWS1/SETD2	2
GO:0016926	protein desumoylation	2/834	4/16374	0.0145147	0.165977	0.148634	USPL1/SENP1	2
GO:0021888	hypothalamus gonadotrophin-releasing hormone neuron development	2/834	4/16374	0.0145147	0.165977	0.148634	UBB/NRP2	2
GO:0032057	negative regulation of translational initiation in response to stress	2/834	4/16374	0.0145147	0.165977	0.148634	ATF4/EIF2S1	2
GO:0032387	negative regulation of intracellular transport	2/834	4/16374	0.0145147	0.165977	0.148634	CRYAB/MAP1B	2
GO:0032648	regulation of interferon-beta production	2/834	4/16374	0.0145147	0.165977	0.148634	RNF216/TRAF3	2
GO:0043371	negative regulation of CD4-positive, alpha-beta T cell differentiation	2/834	4/16374	0.0145147	0.165977	0.148634	CBFB/RUNX1	2
GO:0043378	positive regulation of CD8-positive, alpha-beta T cell differentiation	2/834	4/16374	0.0145147	0.165977	0.148634	CBFB/RUNX1	2
GO:0048254	snoRNA localization	2/834	4/16374	0.0145147	0.165977	0.148634	NOP58/ZNHIT6	2
GO:0070940	dephosphorylation of RNA polymerase II C-terminal domain	2/834	4/16374	0.0145147	0.165977	0.148634	RPRD1A/RPRD1B	2
GO:0090118	receptor-mediated endocytosis involved in cholesterol transport	2/834	4/16374	0.0145147	0.165977	0.148634	LDLR/ANXA2	2
GO:1900024	regulation of substrate adhesion-dependent cell spreading	2/834	4/16374	0.0145147	0.165977	0.148634	PDPN/WASHC2C	2
GO:1900037	regulation of cellular response to hypoxia	2/834	4/16374	0.0145147	0.165977	0.148634	ROCK2/CHCHD2	2
GO:1900365	positive regulation of mRNA polyadenylation	2/834	4/16374	0.0145147	0.165977	0.148634	HSF1/NUDT21	2
GO:1902255	positive regulation of intrinsic apoptotic signaling pathway by p53 class mediator	2/834	4/16374	0.0145147	0.165977	0.148634	UBB/RPS7	2
GO:1902806	regulation of cell cycle G1/S phase transition	2/834	4/16374	0.0145147	0.165977	0.148634	TAF1/FBXW7	2
GO:1902953	positive regulation of ER to Golgi vesicle-mediated transport	2/834	4/16374	0.0145147	0.165977	0.148634	ARF1/STX18	2
GO:1902969	mitotic DNA replication	2/834	4/16374	0.0145147	0.165977	0.148634	FGFR1/RTF2	2
GO:1904031	positive regulation of cyclin-dependent protein kinase activity	2/834	4/16374	0.0145147	0.165977	0.148634	CDKN1A/HSP90AB1	2
GO:2000623	negative regulation of nuclear-transcribed mRNA catabolic process, nonsense-mediated decay	2/834	4/16374	0.0145147	0.165977	0.148634	DHX34/PABPC1	2
GO:0035666	TRIF-dependent toll-like receptor signaling pathway	5/834	29/16374	0.0145257	0.165977	0.148634	UBE2D3/UBB/UBC/TRAF3/RPS27A	5
GO:0060071	Wnt signaling pathway, planar cell polarity pathway	11/834	102/16374	0.01466	0.166736	0.149315	PSME4/GPC6/PSMD1/PSMA7/PSMD14/PSMB4/PSMB1/CLTC/PSMD12/PSMB7/PSMD5	11
GO:0050852	T cell receptor signaling pathway	16/834	172/16374	0.0146818	0.166736	0.149315	PSME4/FBXW11/PSMD1/PSMA7/BCAR1/EIF2B3/PSMD14/PSMB4/MAP3K7/PSMB1/SKP1/EIF2B1/PSMD12/CYLD/PSMB7/PSMD5	16
GO:0000245	spliceosomal complex assembly	6/834	40/16374	0.0149655	0.169442	0.151738	KHDC4/SNRNP200/SNRPD1/SNRPG/PRPF6/SCAF11	6
GO:0090263	positive regulation of canonical Wnt signaling pathway	13/834	130/16374	0.0152605	0.172259	0.15426	PSME4/SULF2/VCP/PSMD1/PSMA7/PSMD14/PSMB4/PSMB1/UBE2B/DAPK3/PSMD12/PSMB7/PSMD5	13
GO:0072655	establishment of protein localization to mitochondrion	8/834	64/16374	0.0155419	0.174905	0.15663	HSP90AA1/USP36/BAG3/UBE2D3/HSPA4/DNAJA1/ARIH2/FBXW7	8
GO:0034101	erythrocyte homeostasis	7/834	52/16374	0.0157299	0.175957	0.157572	HSPA9/HMOX1/EPAS1/DYRK3/ADAR/RPS19/SMAD5	7
GO:0090307	mitotic spindle assembly	7/834	52/16374	0.0157299	0.175957	0.157572	KPNB1/BCCIP/HSPA1A/HNRNPU/CEP192/ZNF207/FLNA	7
GO:0000244	spliceosomal tri-snRNP complex assembly	3/834	11/16374	0.0159753	0.176581	0.158131	PRPF3/PRPF8/PRPF6	3
GO:0030490	maturation of SSU-rRNA	3/834	11/16374	0.0159753	0.176581	0.158131	RPS19/UTP20/RIOK3	3
GO:0046902	regulation of mitochondrial membrane permeability	3/834	11/16374	0.0159753	0.176581	0.158131	STAT3/TP53/BCL2L1	3
GO:1990440	positive regulation of transcription from RNA polymerase II promoter in response to endoplasmic reticulum stress	3/834	11/16374	0.0159753	0.176581	0.158131	ATF4/TP53/ATF6	3
GO:0034097	response to cytokine	24/834	295/16374	0.0162367	0.17894	0.160243	VIM/HSP90AA1/RAPGEF1/HMOX1/IL1R1/UBB/IL6R/STAT3/ANXA1/IL1RAP/CDKN1A/TP53/HSPA8/MCL1/BCL2L1/ITGB1/CEBPD/UBC/GAB2/MAPKAPK2/CRK/YWHAZ/ZC3H15/RPS27A	24
GO:0007346	regulation of mitotic cell cycle	5/834	30/16374	0.016719	0.180873	0.161974	HNRNPU/NEK6/DAPK3/SDCBP/CYLD	5
GO:0016071	mRNA metabolic process	5/834	30/16374	0.016719	0.180873	0.161974	IWS1/PCBP2/CEBPG/PNPT1/NUDT21	5
GO:0032480	negative regulation of type I interferon production	5/834	30/16374	0.016719	0.180873	0.161974	NPLOC4/RNF216/PCBP2/TRIM25/CYLD	5
GO:0006110	regulation of glycolytic process	6/834	41/16374	0.0167976	0.180873	0.161974	NUP214/RANBP2/NUP98/NUP58/NUP153/NUP107	6
GO:0019941	modification-dependent protein catabolic process	6/834	41/16374	0.0167976	0.180873	0.161974	TAF1/RPS7/RPL23/UBE3A/CSNK2A1/FBXW7	6
GO:0036503	ERAD pathway	6/834	41/16374	0.0167976	0.180873	0.161974	NPLOC4/VCP/SEC61B/FAF2/UBQLN1/USP14	6
GO:0010165	response to X-ray	4/834	20/16374	0.0168491	0.180873	0.161974	XRRA1/CDKN1A/TP53/HMGA2	4
GO:0022618	ribonucleoprotein complex assembly	4/834	20/16374	0.0168491	0.180873	0.161974	KHDC4/SNRNP200/RPL13A/RPL38	4
GO:0071901	negative regulation of protein serine/threonine kinase activity	4/834	20/16374	0.0168491	0.180873	0.161974	RPTOR/HSPB1/H2AFY/YWHAG	4
GO:0018107	peptidyl-threonine phosphorylation	10/834	91/16374	0.0172353	0.184487	0.165211	CHI3L1/CAMK2D/ACVR1/TAF1/RPTOR/ROCK2/CSNK2A1/WNK3/TGFBR2/SPRED1	10
GO:0048144	fibroblast proliferation	9/834	78/16374	0.0173653	0.185346	0.16598	FTH1/PRKDC/S100A6/CDKN1A/TP53/DDR2/GSTP1/WAPL/CTNNB1	9
GO:0007049	cell cycle	34/834	458/16374	0.0180141	0.191721	0.171689	BIRC6/MDM2/WTAP/NUDC/TAF1/HSF1/RAD23A/NUP214/RACK1/STAT3/SENP5/NSMCE2/HNRNPU/HSPA8/USP16/DYRK3/ITGB1/ASNS/CCNT1/KLHL42/NEK6/SIAH1/GAK/CSNK2A1/RPS6KA3/PRPF40A/DAPK3/TGFB2/UBE2I/SDCBP/CCPG1/CYLD/KLHL21/ARL8B	34
GO:0001816	cytokine production	32/834	426/16374	0.0183191	0.194412	0.174099	CHI3L1/PRKDC/DHX36/HSPD1/SARS/SULF2/NPLOC4/XRCC5/IL1R1/HSPA1A/RNF216/ADAM17/IL6R/ATF4/CAPN2/PCBP2/ANXA1/IL1RAP/TRIM56/ATP2B1/RAB1A/MAP3K7/ARHGEF2/KPNA6/TRAF3/RUNX1/MAPKAPK2/PCSK5/TRIM25/CTNNB1/CYLD/MERTK	32
GO:0045184	establishment of protein localization	8/834	66/16374	0.0184652	0.195406	0.174989	MDM2/KPNB1/VCP/DNAJA1/SLC7A11/GAPVD1/SNX3/FLNA	8
GO:0034198	cellular response to amino acid starvation	6/834	42/16374	0.0187785	0.197599	0.176952	LARS/ATF4/SESN2/CDKN1A/EIF2S1/GCN1	6
GO:0038034	signal transduction in absence of ligand	6/834	42/16374	0.0187785	0.197599	0.176952	HSPA1A/FGFR1/MCL1/BCL2L1/STRADB/DAPK3	6
GO:0021675	nerve development	5/834	31/16374	0.0191213	0.200639	0.179675	SERPINE2/SULF2/CTNNB1/CHD7/NRP2	5
GO:0032940	secretion by cell	13/834	134/16374	0.0191965	0.200862	0.179875	SERPINE2/PCLO/ARF1/DPH3/ANXA1/VEGFC/PPID/ADAM9/HAP1/EXOC1/TGFB2/PPIA/MERTK	13
GO:0065003	protein-containing complex assembly	19/834	223/16374	0.0197313	0.20588	0.184368	MDM2/HSP90AA1/WARS/PIEZO1/MDN1/NIFK/IL1RAP/VCP/EPRS/TP53/HSPA8/PPID/LAMC1/SLC7A6/RAF1/ARHGEF2/ICE1/FNIP2/DLG5	19
GO:0015833	peptide transport	4/834	21/16374	0.0199942	0.20804	0.186303	DNAJA1/SLC7A11/GAPVD1/SNX3	4
GO:0000723	telomere maintenance	9/834	80/16374	0.0201997	0.209593	0.187693	SMG6/DHX36/PTGES3/XRCC5/HNRNPA2B1/NAF1/WRN/GNL3/MAP3K4	9
GO:0000423	mitophagy	3/834	12/16374	0.0205068	0.209857	0.18793	SQSTM1/TP53/AMBRA1	3
GO:0006122	mitochondrial electron transport, ubiquinol to cytochrome c	3/834	12/16374	0.0205068	0.209857	0.18793	UQCRFS1/UQCRC2/UQCR10	3
GO:0008334	histone mRNA metabolic process	3/834	12/16374	0.0205068	0.209857	0.18793	SNRPG/SNRPD3/SLBP	3
GO:0106074	aminoacyl-tRNA metabolism involved in translational fidelity	3/834	12/16374	0.0205068	0.209857	0.18793	IARS/LARS/AARS	3
GO:2000772	regulation of cellular senescence	3/834	12/16374	0.0205068	0.209857	0.18793	TP53/PNPT1/NEK6	3
GO:0071276	cellular response to cadmium ion	5/834	32/16374	0.0217395	0.217745	0.194994	HMOX1/UBE2D3/HSF1/PPP5C/OGG1	5
GO:0035592	establishment of protein localization to extracellular region	8/834	68/16374	0.021762	0.217745	0.194994	ARF1/DPH3/VEGFC/PPID/ADAM9/EXOC1/TGFB2/PPIA	8
GO:0097190	apoptotic signaling pathway	19/834	226/16374	0.022337	0.217745	0.194994	BIRC6/ACVR1/CTTN/SH3RF1/RACK1/GCLM/TP53/TPD52L1/BCL2L1/RAF1/DAP3/SIAH1/CSNK2A1/GSTP1/SCG2/DAPK3/SENP1/CTNNB1/CYLD	19
GO:0030218	erythrocyte differentiation	10/834	95/16374	0.0226402	0.217745	0.194994	HSPA9/HSPA1A/EPAS1/STAT3/DYRK3/ADAR/RPS19/RPS6/SENP1/SMAD5	10
GO:0032355	response to estradiol	10/834	95/16374	0.0226402	0.217745	0.194994	CRYAB/RBBP8/MBD2/STAT3/NQO1/GSTP1/MAP1B/OGG1/CTNNB1/MBD4	10
GO:0043534	blood vessel endothelial cell migration	10/834	95/16374	0.0226402	0.217745	0.194994	HMOX1/HSPB1/ADAM17/FGFR1/ANXA1/VEGFC/TMSB4X/ANGPT2/SPRED1/FBXW7	10
GO:0030010	establishment of cell polarity	7/834	56/16374	0.0229199	0.217745	0.194994	HSP90AA1/RACK1/ROCK2/HSP90AB1/KIF26B/WWC1/CRK	7
GO:0010718	positive regulation of epithelial to mesenchymal transition	6/834	44/16374	0.023206	0.217745	0.194994	PDPN/TGFB2/TGFBR2/CTNNB1/SDCBP/WWTR1	6
GO:0016049	cell growth	21/834	258/16374	0.0233404	0.217745	0.194994	CAMK2D/SERPINE2/CRYAB/HSPA1A/RPTOR/ADAM17/SPOCK1/RACK1/SESN2/SLC25A33/CDKN1A/TP53/BCAR1/ENO1/CSNK2A1/RPS6KA3/TGFB2/RBBP7/SDCBP/ADNP2/LAMTOR1	21
GO:0000492	box C/D snoRNP assembly	2/834	5/16374	0.0233787	0.217745	0.194994	ZNHIT6/SNU13	2
GO:0002309	T cell proliferation involved in immune response	2/834	5/16374	0.0233787	0.217745	0.194994	TP53/RPS6	2
GO:0002326	B cell lineage commitment	2/834	5/16374	0.0233787	0.217745	0.194994	PRKDC/TP53	2
GO:0002360	T cell lineage commitment	2/834	5/16374	0.0233787	0.217745	0.194994	PRKDC/TP53	2
GO:0003289	atrial septum primum morphogenesis	2/834	5/16374	0.0233787	0.217745	0.194994	ACVR1/TGFB2	2
GO:0006403	RNA localization	2/834	5/16374	0.0233787	0.217745	0.194994	DHX36/PRPF6	2
GO:0006534	cysteine metabolic process	2/834	5/16374	0.0233787	0.217745	0.194994	GCLM/SLC7A11	2
GO:0006595	polyamine metabolic process	2/834	5/16374	0.0233787	0.217745	0.194994	ODC1/AMD1	2
GO:0006807	nitrogen compound metabolic process	2/834	5/16374	0.0233787	0.217745	0.194994	MYO1E/ARID5B	2
GO:0008298	intracellular mRNA localization	2/834	5/16374	0.0233787	0.217745	0.194994	DHX36/CASC3	2
GO:0016576	histone dephosphorylation	2/834	5/16374	0.0233787	0.217745	0.194994	PPP5C/EYA3	2
GO:0035617	stress granule disassembly	2/834	5/16374	0.0233787	0.217745	0.194994	VCP/DYRK3	2
GO:0036091	positive regulation of transcription from RNA polymerase II promoter in response to oxidative stress	2/834	5/16374	0.0233787	0.217745	0.194994	ATF4/SESN2	2
GO:0045040	protein insertion into mitochondrial outer membrane	2/834	5/16374	0.0233787	0.217745	0.194994	HSP90AA1/HSPA4	2
GO:0051246	regulation of protein metabolic process	2/834	5/16374	0.0233787	0.217745	0.194994	LDLR/ROCK2	2
GO:0071359	cellular response to dsRNA	2/834	5/16374	0.0233787	0.217745	0.194994	NPM1/RIOK3	2
GO:0071500	cellular response to nitrosative stress	2/834	5/16374	0.0233787	0.217745	0.194994	DNAJA1/ATG5	2
GO:0075525	viral translational termination-reinitiation	2/834	5/16374	0.0233787	0.217745	0.194994	EIF3B/EIF3A	2
GO:0097350	neutrophil clearance	2/834	5/16374	0.0233787	0.217745	0.194994	ANXA1/MERTK	2
GO:1902254	negative regulation of intrinsic apoptotic signaling pathway by p53 class mediator	2/834	5/16374	0.0233787	0.217745	0.194994	MDM2/RRN3	2
GO:1902749	regulation of cell cycle G2/M phase transition	2/834	5/16374	0.0233787	0.217745	0.194994	TP53/NEK10	2
GO:1904504	positive regulation of lipophagy	2/834	5/16374	0.0233787	0.217745	0.194994	SESN2/SPTLC1	2
GO:1905907	negative regulation of amyloid fibril formation	2/834	5/16374	0.0233787	0.217745	0.194994	CRYAB/LDLR	2
GO:0002756	MyD88-independent toll-like receptor signaling pathway	4/834	22/16374	0.0234772	0.217745	0.194994	UBE2D3/UBB/UBC/RPS27A	4
GO:0018023	peptidyl-lysine trimethylation	4/834	22/16374	0.0234772	0.217745	0.194994	IWS1/BRD4/ZNF274/SETD2	4
GO:0042273	ribosomal large subunit biogenesis	4/834	22/16374	0.0234772	0.217745	0.194994	MRTO4/SDAD1/RPL14/RPL26	4
GO:0046545	development of primary female sexual characteristics	4/834	22/16374	0.0234772	0.217745	0.194994	LHFPL2/UBB/NUP107/ARID5B	4
GO:0046580	negative regulation of Ras protein signal transduction	4/834	22/16374	0.0234772	0.217745	0.194994	MAPKAP1/RAPGEF1/EPHB2/TGFB2	4
GO:0007569	cell aging	8/834	69/16374	0.0235574	0.217745	0.194994	NAMPT/PRKDC/TP53/PNPT1/NPM1/HMGA2/WRN/NEK6	8
GO:0051865	protein autoubiquitination	8/834	69/16374	0.0235574	0.217745	0.194994	MDM2/SH3RF1/UBE2D3/TAF1/LTN1/UBE3A/UBE2B/RNF4	8
GO:0051301	cell division	31/834	419/16374	0.0240992	0.222202	0.198985	BIRC6/RBBP8/CCNY/NUDC/NSUN2/RACK1/SENP5/NSMCE2/SMC5/HNRNPU/VEGFC/USP16/HMGA2/BCAR1/DYRK3/ENSA/ZNF830/CCNT1/KLHL42/SPART/NEK6/ANAPC1/CLTC/PRPF40A/ZNF207/WAPL/TGFB2/UBE2I/KLHL21/ARL8B/ANKLE2	31
GO:0006302	double-strand break repair	12/834	124/16374	0.0242735	0.223256	0.199929	PRKDC/RBBP8/SMCHD1/XRCC5/HSF1/VCP/TP53/HMGA2/WRN/SETD2/TENT4A/EYA3	12
GO:0009057	macromolecule catabolic process	11/834	110/16374	0.0244168	0.224021	0.200614	SERPINE2/MDM2/XPO1/ODC1/VCP/PSMD1/CSNK2A1/SF3B3/SNX3/FLNA/UBXN2A	11
GO:0006370	7-methylguanosine mRNA capping	5/834	33/16374	0.02458	0.224965	0.201459	RNMT/RNGTT/POLR2B/GTF2F2/CCNH	5
GO:0000045	autophagosome assembly	8/834	70/16374	0.0254543	0.228744	0.204843	VMP1/RAB3GAP2/BAG3/AMBRA1/RAB1A/UBQLN1/ATG5/IFT20	8
GO:0009303	rRNA transcription	3/834	13/16374	0.0256684	0.228744	0.204843	MARS/NIFK/TP53	3
GO:0010666	positive regulation of cardiac muscle cell apoptotic process	3/834	13/16374	0.0256684	0.228744	0.204843	CAMK2D/CAPN2/TP53	3
GO:0030516	regulation of axon extension	3/834	13/16374	0.0256684	0.228744	0.204843	NRCAM/CTTN/WDR36	3
GO:0034214	protein hexamerization	3/834	13/16374	0.0256684	0.228744	0.204843	MAT2A/VCP/YME1L1	3
GO:0048489	synaptic vesicle transport	3/834	13/16374	0.0256684	0.228744	0.204843	ARF1/TMEM230/CTNNB1	3
GO:0070431	nucleotide-binding oligomerization domain containing 2 signaling pathway	3/834	13/16374	0.0256684	0.228744	0.204843	HSPA1A/NFKBIA/OTULIN	3
GO:0080009	mRNA methylation	3/834	13/16374	0.0256684	0.228744	0.204843	WTAP/METTL16/TRMT10C	3
GO:0090399	replicative senescence	3/834	13/16374	0.0256684	0.228744	0.204843	CDKN1A/TP53/ATR	3
GO:1902475	L-alpha-amino acid transmembrane transport	3/834	13/16374	0.0256684	0.228744	0.204843	SLC38A1/SLC7A5/SLC7A6	3
GO:1903204	negative regulation of oxidative stress-induced neuron death	3/834	13/16374	0.0256684	0.228744	0.204843	ATF4/SLC7A11/CTNNB1	3
GO:0043123	positive regulation of I-kappaB kinase/NF-kappaB signaling	15/834	169/16374	0.0259156	0.230395	0.206322	DHX36/DDX21/HMOX1/TNFRSF10B/ATP2C1/AKAP13/BRD4/EEF1D/MAP3K7/PPP5C/NEK6/TRIM25/UBE2I/CTNNB1/FLNA	15
GO:0044772	mitotic cell cycle phase transition	24/834	309/16374	0.0266086	0.235993	0.211335	HSP90AA1/PSME4/UBE2E2/RPTOR/ADAM17/DYNLL1/RAD51B/CDKN1A/PSMD1/PSMA7/NSMCE2/BRD4/PSMD14/PSMB4/PSMB1/SKP1/CEP192/NEK6/ANAPC1/PSMD12/BACH1/YWHAG/PSMB7/PSMD5	24
GO:0070527	platelet aggregation	7/834	58/16374	0.0272508	0.238762	0.213815	SERPINE2/PDPN/HSPB1/ACTG1/ACTB/SLC7A11/FLNA	7
GO:0000726	non-recombinational repair	4/834	23/16374	0.0273054	0.238762	0.213815	PRKDC/SMCHD1/HSF1/HMGA2	4
GO:0006913	nucleocytoplasmic transport	4/834	23/16374	0.0273054	0.238762	0.213815	XPO1/NUP214/NUP98/NPM1	4
GO:0009966	regulation of signal transduction	4/834	23/16374	0.0273054	0.238762	0.213815	GPC6/CRK/YWHAG/MTCH1	4
GO:0060249	anatomical structure homeostasis	4/834	23/16374	0.0273054	0.238762	0.213815	SMG6/DHX36/XRCC5/GNL3	4
GO:2000378	negative regulation of reactive oxygen species metabolic process	4/834	23/16374	0.0273054	0.238762	0.213815	CRYAB/VDAC1/TP53/ATG5	4
GO:0006919	activation of cysteine-type endopeptidase activity involved in apoptotic process	8/834	71/16374	0.0274552	0.23895	0.213983	HSPE1/HSPD1/RPS27L/TNFRSF10B/RACK1/VCP/SENP1/MTCH1	8
GO:0042795	snRNA transcription by RNA polymerase II	8/834	71/16374	0.0274552	0.23895	0.213983	ELL2/CCNT1/RPRD1A/ICE1/POLR2B/GTF2F2/RPRD1B/INTS11	8
GO:0046632	alpha-beta T cell differentiation	5/834	34/16374	0.0276484	0.239512	0.214486	CBFB/SH3RF1/ANXA1/RUNX1/TGFBR2	5
GO:1902042	negative regulation of extrinsic apoptotic signaling pathway via death domain receptors	5/834	34/16374	0.0276484	0.239512	0.214486	HMOX1/TNFRSF10B/BCL2L1/RAF1/ARHGEF2	5
GO:0048514	blood vessel morphogenesis	22/834	279/16374	0.0282816	0.243887	0.218404	NRCAM/WARS/HMOX1/NAA15/EPAS1/FGFR1/ANXA2/ARHGAP24/GLUL/SETD2/EPHB2/ANGPT2/MYO1E/VAV3/SCG2/SAT1/TGFB2/GJC1/TGFBR2/SPRED1/NRP2/FBXW7	22
GO:0031648	protein destabilization	6/834	46/16374	0.0282843	0.243887	0.218404	PRKDC/MDM2/RAD23A/FBXW11/SIAH1/FBXW7	6
GO:0001525	angiogenesis	31/834	425/16374	0.0285771	0.245842	0.220155	CHI3L1/NRCAM/ACVR1/SARS/WARS/HMOX1/NAA15/ADAMTS9/HSPB1/EPAS1/FGFR1/STAT3/ADAM12/ANXA2/ROCK2/HMGA2/ARHGAP24/ITGB1/GLUL/SETD2/EPHB2/ANGPT2/VAV3/RUNX1/SCG2/SAT1/TGFB2/TGFBR2/CTNNB1/SPRED1/NRP2	31
GO:0001701	in utero embryonic development	17/834	202/16374	0.0292874	0.251372	0.225107	ACVR1/ANKRD11/HSF1/EPAS1/FGFR1/CAPN2/TP53/EIF2S2/RRN3/BCL2L1/ITGB1/MAN2A1/UBE2B/MYO1E/TGFBR2/CTNNB1/CHD7	17
GO:0060041	retina development in camera-type eye	9/834	86/16374	0.0306866	0.260043	0.232872	TENT2/ATP2B1/GNB1/XRN2/MAN2A1/RPL24/TGFB2/CHD7/MERTK	9
GO:0007520	myoblast fusion	5/834	35/16374	0.0309494	0.260043	0.232872	KCNH1/MYOF/GDF15/CAPN2/ADAM12	5
GO:0019985	translesion synthesis	5/834	35/16374	0.0309494	0.260043	0.232872	UBB/VCP/UBC/TRIM25/RPS27A	5
GO:0001654	eye development	14/834	158/16374	0.0310658	0.260043	0.232872	CRYAB/SIPA1L3/TENT2/GNB1/XRN2/ATF6/EPHB2/RAB18/RPL24/TGFB2/TGFBR2/SH3PXD2B/CHD7/MERTK	14
GO:0042981	regulation of apoptotic process	14/834	158/16374	0.0310658	0.260043	0.232872	TNFRSF10B/VCP/TP53/RBM25/BCAR1/ACTN4/TPT1/WRN/RAF1/TRAF3/DLG5/DAPK3/CTNNB1/TRIM24	14
GO:0007040	lysosome organization	6/834	47/16374	0.0310775	0.260043	0.232872	ARF1/LYST/ABCA1/RAB39A/TMEM165/LAMTOR1	6
GO:0043547	positive regulation of GTPase activity	23/834	298/16374	0.0313956	0.260043	0.232872	SIPA1L2/RAPGEF1/LARS/RAB3GAP2/SIPA1L3/AGAP1/RGS6/RACK1/RANBP2/ARHGAP24/ITGB1/ARHGAP10/ARFGAP3/RGS17/GAPVD1/VAV3/TBCD/ARHGAP29/MYO9B/ZC3H15/RABEP1/RIC8B/SRGAP1	23
GO:0016578	histone deubiquitination	3/834	14/16374	0.0314587	0.260043	0.232872	USP36/USP16/SUPT3H	3
GO:0019081	viral translation	3/834	14/16374	0.0314587	0.260043	0.232872	EIF3B/PCBP2/EIF3A	3
GO:0021545	cranial nerve development	3/834	14/16374	0.0314587	0.260043	0.232872	EPHB2/CTNNB1/CHD7	3
GO:0032743	positive regulation of interleukin-2 production	3/834	14/16374	0.0314587	0.260043	0.232872	ANXA1/MAP3K7/RUNX1	3
GO:0050765	negative regulation of phagocytosis	3/834	14/16374	0.0314587	0.260043	0.232872	RACK1/ATG5/SNX3	3
GO:0090505	epiboly involved in wound healing	3/834	14/16374	0.0314587	0.260043	0.232872	CD44/PDPN/FLNA	3
GO:0003203	endocardial cushion morphogenesis	4/834	24/16374	0.0314844	0.260043	0.232872	ACVR1/MDM2/TGFB2/TGFBR2	4
GO:0060828	regulation of canonical Wnt signaling pathway	4/834	24/16374	0.0314844	0.260043	0.232872	CCNY/OTULIN/IFT20/CTNNB1	4
GO:0061025	membrane fusion	4/834	24/16374	0.0314844	0.260043	0.232872	NAPA/ANXA7/RABEP1/STX18	4
GO:0061726	mitochondrion disassembly	4/834	24/16374	0.0314844	0.260043	0.232872	USP36/CTTN/VDAC1/FBXW7	4
GO:0097435	supramolecular fiber organization	12/834	129/16374	0.0317715	0.261834	0.234476	CRYAB/CLIP1/FKBP4/ACTG1/LDLR/HSPA8/HSP90AB1/ITGB1/ARHGEF2/TBCD/MAP1B/AEBP1	12
GO:0003279	cardiac septum development	7/834	60/16374	0.0321063	0.262272	0.234868	ACVR1/MDM2/TP53/PCSK5/TGFB2/TGFBR2/CHD7	7
GO:0010977	negative regulation of neuron projection development	7/834	60/16374	0.0321063	0.262272	0.234868	VIM/MDM2/FKBP4/SPOCK1/GAK/DGUOK/PAQR3	7
GO:0017148	negative regulation of translation	7/834	60/16374	0.0321063	0.262272	0.234868	DHX36/RACK1/EPRS/RBM3/RPL13A/DAPK3/ILF3	7
GO:0044257	cellular protein catabolic process	7/834	60/16374	0.0321063	0.262272	0.234868	MDM2/HSP90AA1/LONP1/CAPN2/ANXA2/UBE2G2/CTSL	7
GO:0006090	pyruvate metabolic process	10/834	101/16374	0.0329039	0.262497	0.23507	VDAC1/NUP214/STAT3/RANBP2/NUP98/NUP58/NUP153/NUP107/ME3/GLO1	10
GO:0000018	regulation of DNA recombination	2/834	6/16374	0.0338956	0.262497	0.23507	THOC1/KPNA1	2
GO:0001731	formation of translation preinitiation complex	2/834	6/16374	0.0338956	0.262497	0.23507	EIF5/RPL13A	2
GO:0002372	myeloid dendritic cell cytokine production	2/834	6/16374	0.0338956	0.262497	0.23507	DHX36/DDX21	2
GO:0002735	positive regulation of myeloid dendritic cell cytokine production	2/834	6/16374	0.0338956	0.262497	0.23507	DHX36/DDX21	2
GO:0003284	septum primum development	2/834	6/16374	0.0338956	0.262497	0.23507	ACVR1/TGFB2	2
GO:0009299	mRNA transcription	2/834	6/16374	0.0338956	0.262497	0.23507	HSF1/TP53	2
GO:0010835	regulation of protein ADP-ribosylation	2/834	6/16374	0.0338956	0.262497	0.23507	PUM3/WARS	2
GO:0031340	positive regulation of vesicle fusion	2/834	6/16374	0.0338956	0.262497	0.23507	ANXA1/ANXA2	2
GO:0032510	endosome to lysosome transport via multivesicular body sorting pathway	2/834	6/16374	0.0338956	0.262497	0.23507	LYST/VCP	2
GO:0032675	regulation of interleukin-6 production	2/834	6/16374	0.0338956	0.262497	0.23507	CAPN2/MAPKAPK2	2
GO:0033119	negative regulation of RNA splicing	2/834	6/16374	0.0338956	0.262497	0.23507	RPS26/RPS13	2
GO:0036003	positive regulation of transcription from RNA polymerase II promoter in response to stress	2/834	6/16374	0.0338956	0.262497	0.23507	ATF4/GCN1	2
GO:0043619	regulation of transcription from RNA polymerase II promoter in response to oxidative stress	2/834	6/16374	0.0338956	0.262497	0.23507	HMOX1/EPAS1	2
GO:0051891	positive regulation of cardioblast differentiation	2/834	6/16374	0.0338956	0.262497	0.23507	DHX36/TGFB2	2
GO:0060440	trachea formation	2/834	6/16374	0.0338956	0.262497	0.23507	TGFBR2/CTNNB1	2
GO:0060965	negative regulation of gene silencing by miRNA	2/834	6/16374	0.0338956	0.262497	0.23507	NEAT1/ELAVL1	2
GO:0061724	lipophagy	2/834	6/16374	0.0338956	0.262497	0.23507	SESN2/SPTLC1	2
GO:0070842	aggresome assembly	2/834	6/16374	0.0338956	0.262497	0.23507	BAG3/VCP	2
GO:0098780	response to mitochondrial depolarisation	2/834	6/16374	0.0338956	0.262497	0.23507	SQSTM1/AMBRA1	2
GO:1902949	positive regulation of tau-protein kinase activity	2/834	6/16374	0.0338956	0.262497	0.23507	HSP90AA1/HSP90AB1	2
GO:1990845	adaptive thermogenesis	2/834	6/16374	0.0338956	0.262497	0.23507	THADA/HNRNPU	2
GO:2000373	positive regulation of DNA topoisomerase (ATP-hydrolyzing) activity	2/834	6/16374	0.0338956	0.262497	0.23507	HNRNPU/PLSCR1	2
GO:2001033	negative regulation of double-strand break repair via nonhomologous end joining	2/834	6/16374	0.0338956	0.262497	0.23507	HSF1/HMGA2	2
GO:2001046	positive regulation of integrin-mediated signaling pathway	2/834	6/16374	0.0338956	0.262497	0.23507	CD63/FLNA	2
GO:0036297	interstrand cross-link repair	6/834	48/16374	0.0340448	0.263026	0.235543	UBB/MUS81/UBC/ATR/NUCKS1/RPS27A	6
GO:0006289	nucleotide-excision repair	8/834	74/16374	0.0341051	0.263026	0.235543	RBBP8/UBB/RAD23A/TP53/UBC/OGG1/CCNH/RPS27A	8
GO:0007339	binding of sperm to zona pellucida	5/834	36/16374	0.0344872	0.264876	0.2372	CCT4/CCT3/CCT5/TCP1/CCT2	5
GO:0150063	visual system development	5/834	36/16374	0.0344872	0.264876	0.2372	SIPA1L3/ATF6/RAB18/TGFB2/SH3PXD2B	5
GO:0006352	DNA-templated transcription, initiation	7/834	61/16374	0.0347377	0.265704	0.237942	DHX36/TAF1/TP53/TAF7/RRN3/GTF3C3/CTNNB1	7
GO:0009612	response to mechanical stimulus	7/834	61/16374	0.0347377	0.265704	0.237942	CHI3L1/MBD2/ACTG1/ASNS/ANGPT2/MAP1B/TGFBR2	7
GO:0070126	mitochondrial translational termination	9/834	88/16374	0.0348967	0.266374	0.238541	MRPL50/MRPL18/PTCD3/MRPL21/MRPS18C/DAP3/MRPL3/MRPL33/MRPS6	9
GO:0007050	cell cycle arrest	15/834	176/16374	0.0354156	0.269781	0.241593	MDM2/MAP3K20/RPTOR/SLC25A33/CDKN1A/TP53/RHEB/GADD45A/HMGA2/HSP90AB1/RPL23/STRADB/TGFB2/RRAGD/LAMTOR1	15
GO:0007005	mitochondrion organization	13/834	146/16374	0.0355863	0.270529	0.242262	SQSTM1/PPRC1/TIMM44/LONP1/EPAS1/SESN2/TOMM40/SLC25A33/YME1L1/TIMM23/MAN2A1/SSBP1/FNIP2	13
GO:0007178	transmembrane receptor protein serine/threonine kinase signaling pathway	17/834	207/16374	0.0357995	0.271595	0.243217	ACVR1/VIM/CHST11/GDF15/HSPA1A/ADAM17/UBB/STRAP/TP53/HSP90AB1/UBC/TGFB2/CTDSPL2/TGFBR2/SDCBP/RPS27A/SMAD5	17
GO:0006979	response to oxidative stress	11/834	117/16374	0.0362406	0.274382	0.245713	MAPKAP1/HMOX1/EPAS1/GCLM/SESN2/TP53/H2AFY/PRDX6/WRN/OGG1/LIAS	11
GO:0002062	chondrocyte differentiation	9/834	89/16374	0.0371439	0.280424	0.251123	CHST11/SULF2/FGFR1/POR/SERPINH1/SNX19/HMGA2/CHSY1/CTNNB1	9
GO:0051881	regulation of mitochondrial membrane potential	6/834	49/16374	0.0371891	0.280424	0.251123	UBB/RACK1/GCLM/SLC25A33/BCL2L1/SPART	6
GO:0043542	endothelial cell migration	13/834	147/16374	0.0373001	0.280693	0.251364	ADAMTS9/HSPB1/ADAM17/FGFR1/VEGFC/ROCK2/BCAR1/TMSB4X/GLUL/ANGPT2/DNAJA4/SCG2/NRP2	13
GO:0007584	response to nutrient	7/834	62/16374	0.0375083	0.281014	0.251652	GCLM/ABCA1/NQO1/POR/ENSA/ACSL3/TGFBR2	7
GO:0003170	heart valve development	3/834	15/16374	0.0378709	0.281014	0.251652	HECTD1/ADAMTS9/TGFB2	3
GO:0043518	negative regulation of DNA damage response, signal transduction by p53 class mediator	3/834	15/16374	0.0378709	0.281014	0.251652	CD44/MDM2/DYRK3	3
GO:0048026	positive regulation of mRNA splicing, via spliceosome	3/834	15/16374	0.0378709	0.281014	0.251652	NUP98/HSPA8/PRDX6	3
GO:0061136	regulation of proteasomal protein catabolic process	3/834	15/16374	0.0378709	0.281014	0.251652	UBB/PSMD14/USP14	3
GO:1905564	positive regulation of vascular endothelial cell proliferation	3/834	15/16374	0.0378709	0.281014	0.251652	ADAM17/FGFR1/STAT3	3
GO:1990000	amyloid fibril formation	3/834	15/16374	0.0378709	0.281014	0.251652	CRYAB/MDM2/LDLR	3
GO:0042769	DNA damage response, detection of DNA damage	5/834	37/16374	0.0382654	0.282815	0.253264	UBB/HMGA2/UBC/UBE2B/RPS27A	5
GO:0043536	positive regulation of blood vessel endothelial cell migration	5/834	37/16374	0.0382654	0.282815	0.253264	HSPB1/ADAM17/FGFR1/VEGFC/TMSB4X	5
GO:0001933	negative regulation of protein phosphorylation	8/834	76/16374	0.039099	0.287266	0.257251	PRKDC/WARS/FAM129A/PPP5C/EPHB2/PAQR3/WWTR1/DNAJC10	8
GO:0009749	response to glucose	8/834	76/16374	0.039099	0.287266	0.257251	SESN2/EIF2B3/ENSA/GLUL/RAF1/ANGPT2/EIF2B1/TGFBR2	8
GO:0031124	mRNA 3'-end processing	8/834	76/16374	0.039099	0.287266	0.257251	DHX36/HSF1/THOC1/MAGOH/CCNT1/NUDT21/CASC3/RNPS1	8
GO:0051607	defense response to virus	16/834	194/16374	0.0394988	0.289632	0.25937	DHX36/DDX21/LYST/G3BP1/ABCE1/PCBP2/TRIM56/ADAR/SETD2/PLSCR1/TRAF3/EXOC1/TRIM25/ILF3/RIOK3/FLNA	16
GO:0070727	cellular macromolecule localization	14/834	164/16374	0.0406661	0.297042	0.266006	DHX36/HSP90AA1/CTTN/RAB3GAP2/NPM1/HSP90AB1/SEC23IP/ARFGAP3/ATR/ARHGEF2/CLTC/CYLD/STX18/STAM	14
GO:0034504	protein localization to nucleus	13/834	149/16374	0.0409022	0.297042	0.266006	MDM2/XPO1/BAG3/DNAJB6/POLR1A/SESN2/GBP2/IPO5/HNRNPU/NUP58/GLUL/SKP1/FLNA	13
GO:0006906	vesicle fusion	4/834	26/16374	0.0409081	0.297042	0.266006	EEA1/ANXA1/ANXA2/VAV3	4
GO:0031334	positive regulation of protein-containing complex assembly	4/834	26/16374	0.0409081	0.297042	0.266006	WARS/VCP/ICE1/FNIP2	4
GO:0039694	viral RNA genome replication	4/834	26/16374	0.0409081	0.297042	0.266006	EEA1/PCBP2/ROCK2/HMGA2	4
GO:0006865	amino acid transport	5/834	38/16374	0.0422865	0.305844	0.273888	SLC38A1/SFXN5/SLC7A1/SLC7A6/SLC7A11	5
GO:0048880	sensory system development	5/834	38/16374	0.0422865	0.305844	0.273888	SIPA1L3/ATF6/RAB18/TGFB2/SH3PXD2B	5
GO:0009615	response to virus	11/834	120/16374	0.0423666	0.305844	0.273888	HSPB1/ODC1/PCBP2/IFIT2/IFIT3/CCT5/HMGA2/TPT1/ADAR/ENO1/TRAF3	11
GO:0032446	protein modification by small protein conjugation	13/834	150/16374	0.0427923	0.308319	0.276104	HSP90AA1/GTPBP4/HSPA1A/UBB/DNAJA1/HSP90AB1/UBE3A/UBQLN1/ATG5/GNL3/CTNNB1/UBXN2A/FBXW7	13
GO:0022008	neurogenesis	23/834	309/16374	0.0444393	0.312221	0.279598	NRCAM/GAP43/PRTG/SH3RF1/XRCC5/FGFR1/SPOCK1/ATF4/TENT2/ADGRL3/NAPA/XRN2/ARHGEF2/HAP1/MAN2A1/CRK/MAP1B/DAPK3/TGFB2/CTNNB1/CHD7/SATB2/ADNP2	23
GO:0040007	growth	9/834	92/16374	0.0444724	0.312221	0.279598	PRKDC/GAP43/MORF4L2/MT2A/PNPT1/HMGA2/BCL2L1/OPA3/TKT	9
GO:0006796	phosphate-containing compound metabolic process	8/834	78/16374	0.0445591	0.312221	0.279598	SMG6/PTGES3/ARF1/DYNLL1/CDKN1A/PRKRIP1/SDCBP/ANKLE2	8
GO:0016197	endosomal transport	8/834	78/16374	0.0445591	0.312221	0.279598	SQSTM1/UBB/ABCA1/UBAP1/UBC/RPS27A/STAM/LAMTOR1	8
GO:0038096	Fc-gamma receptor signaling pathway involved in phagocytosis	8/834	78/16374	0.0445591	0.312221	0.279598	HSP90AA1/RAPGEF1/ACTG1/HSP90AB1/ACTB/VAV3/BAIAP2/CRK	8
GO:0044703	multi-organism reproductive process	12/834	136/16374	0.0448704	0.312221	0.279598	SERPINE2/VMP1/FKBP4/HSF1/SPP1/APOL2/BCL2L1/RPL29/ANGPT2/KPNA6/PCSK5/TGFBR2	12
GO:0008033	tRNA processing	3/834	16/16374	0.0448938	0.312221	0.279598	SARS/AARS/TYW1	3
GO:0030252	growth hormone secretion	3/834	16/16374	0.0448938	0.312221	0.279598	RAB1A/SERP1/CHD7	3
GO:0033631	cell-cell adhesion mediated by integrin	3/834	16/16374	0.0448938	0.312221	0.279598	PIEZO1/ITGB1/ADAM9	3
GO:0036035	osteoclast development	3/834	16/16374	0.0448938	0.312221	0.279598	ANXA2/FAM20C/FBXW7	3
GO:0043122	regulation of I-kappaB kinase/NF-kappaB signaling	3/834	16/16374	0.0448938	0.312221	0.279598	SQSTM1/HSPB1/ZFAND6	3
GO:0006886	intracellular protein transport	19/834	245/16374	0.0453545	0.312221	0.279598	MDM2/TXN/CTTN/RAB3GAP2/BAG3/IPO5/TP53/NPM1/NUP58/SEC23IP/ARFGAP3/XPO4/ARHGEF2/ICE1/CLTC/CTDSPL2/STX18/FLNA/STAM	19
GO:0000462	maturation of SSU-rRNA from tricistronic rRNA transcript (SSU-rRNA, 5.8S rRNA, LSU-rRNA)	2/834	7/16374	0.0458744	0.312221	0.279598	RPS19/UTP20	2
GO:0007033	vacuole organization	2/834	7/16374	0.0458744	0.312221	0.279598	ANXA2/MAN2A1	2
GO:0007253	cytoplasmic sequestering of NF-kappaB	2/834	7/16374	0.0458744	0.312221	0.279598	NFKBIA/TMSB4X	2
GO:0034551	mitochondrial respiratory chain complex III assembly	2/834	7/16374	0.0458744	0.312221	0.279598	SLC25A33/UQCC1	2
GO:0034616	response to laminar fluid shear stress	2/834	7/16374	0.0458744	0.312221	0.279598	ABCA1/ADAM9	2
GO:0036480	neuron intrinsic apoptotic signaling pathway in response to oxidative stress	2/834	7/16374	0.0458744	0.312221	0.279598	MCL1/FBXW7	2
GO:0044829	positive regulation by host of viral genome replication	2/834	7/16374	0.0458744	0.312221	0.279598	HSPA8/NUCKS1	2
GO:0045002	double-strand break repair via single-strand annealing	2/834	7/16374	0.0458744	0.312221	0.279598	RBBP8/OGG1	2
GO:0045162	clustering of voltage-gated sodium channels	2/834	7/16374	0.0458744	0.312221	0.279598	NRCAM/NFASC	2
GO:0048820	hair follicle maturation	2/834	7/16374	0.0458744	0.312221	0.279598	NSUN2/TRPC4AP	2
GO:0060613	fat pad development	2/834	7/16374	0.0458744	0.312221	0.279598	UBB/ARID5B	2
GO:0060717	chorion development	2/834	7/16374	0.0458744	0.312221	0.279598	DNAJB6/MAP3K4	2
GO:0071248	cellular response to metal ion	2/834	7/16374	0.0458744	0.312221	0.279598	HMOX1/NQO1	2
GO:0071494	cellular response to UV-C	2/834	7/16374	0.0458744	0.312221	0.279598	MDM2/TP53	2
GO:0071971	extracellular exosome assembly	2/834	7/16374	0.0458744	0.312221	0.279598	SDCBP/STAM	2
GO:1990144	intrinsic apoptotic signaling pathway in response to hypoxia	2/834	7/16374	0.0458744	0.312221	0.279598	TP53/ENO1	2
GO:1990791	dorsal root ganglion development	2/834	7/16374	0.0458744	0.312221	0.279598	CTNNB1/NRP2	2
GO:2000483	negative regulation of interleukin-8 secretion	2/834	7/16374	0.0458744	0.312221	0.279598	ANXA1/TMSB4X	2
GO:0031297	replication fork processing	4/834	27/16374	0.0461555	0.312221	0.279598	THOC1/WRN/NUCKS1/BOD1L1	4
GO:0070536	protein K63-linked deubiquitination	4/834	27/16374	0.0461555	0.312221	0.279598	VCP/PSMD14/OTUD4/CYLD	4
GO:2000379	positive regulation of reactive oxygen species metabolic process	4/834	27/16374	0.0461555	0.312221	0.279598	CDKN1A/TP53/GADD45A/TGFBR2	4
GO:0000904	cell morphogenesis involved in differentiation	14/834	167/16374	0.0461836	0.312221	0.279598	NRCAM/TRAK2/S100A6/PDPN/MEF2A/HPRT1/ACTN4/ITGB1/BAIAP2/PITPNA/CRK/WASHC2C/CTNNB1/FLNA	14
GO:0043933	protein-containing complex subunit organization	7/834	65/16374	0.0466758	0.314977	0.282066	HSP90AA1/WARS/VCP/HSPA8/RAF1/ICE1/FNIP2	7
GO:0060070	canonical Wnt signaling pathway	22/834	295/16374	0.0476698	0.321103	0.287552	PSME4/SULF2/RAPGEF1/CCNY/G3BP1/VCP/PSMD1/PSMA7/DIXDC1/PSMD14/PSMB4/OTULIN/PSMB1/UBE2B/DAPK3/IFT20/PSMD12/CTNNB1/WWTR1/CYLD/PSMB7/PSMD5	22
GO:0006898	receptor-mediated endocytosis	14/834	168/16374	0.0481337	0.32306	0.289305	HSPH1/HSP90AA1/CTTN/ARF1/LDLR/CD63/ANXA2/ATAD1/GAK/CLTC/TGFBR2/LDLRAD3/SDCBP/TMEM108	14
GO:0007254	JNK cascade	14/834	168/16374	0.0481337	0.32306	0.289305	MAP4K5/MAP3K20/RAPGEF1/SH3RF1/IRAK2/PJA2/UBB/TPD52L1/GADD45A/MAP3K7/UBC/SDCBP/CYLD/RPS27A	14
GO:0071560	cellular response to transforming growth factor beta stimulus	12/834	138/16374	0.0492122	0.329704	0.295254	ACVR1/GDF15/UBB/TP53/MAP3K7/UBC/ADAM9/CRK/TGFB2/TGFBR2/RPS27A/SMAD5	12
GO:0002790	peptide secretion	8/834	80/16374	0.0504976	0.3365	0.301341	ARF1/DPH3/VEGFC/PPID/ADAM9/EXOC1/TGFB2/PPIA	8
GO:0030307	positive regulation of cell growth	8/834	80/16374	0.0504976	0.3365	0.301341	RPTOR/ADAM17/SLC25A33/CSNK2A1/RPS6KA3/TGFB2/SDCBP/ADNP2	8
GO:0042773	ATP synthesis coupled electron transport	8/834	80/16374	0.0504976	0.3365	0.301341	UQCRFS1/NDUFB2/COX7B/UQCRC2/UQCR10/NDUFA4/NDUFS6/NDUFA10	8
GO:0072606	interleukin-8 secretion	4/834	28/16374	0.0517591	0.343775	0.307855	CHI3L1/ANXA1/TMSB4X/RAB1A	4
GO:0003198	epithelial to mesenchymal transition involved in endocardial cushion formation	3/834	17/16374	0.0525122	0.343775	0.307855	ACVR1/TGFB2/TGFBR2	3
GO:0006613	cotranslational protein targeting to membrane	3/834	17/16374	0.0525122	0.343775	0.307855	SRP54/SRP14/SRP19	3
GO:0010812	negative regulation of cell-substrate adhesion	3/834	17/16374	0.0525122	0.343775	0.307855	SPOCK1/ANGPT2/TBCD	3
GO:0036475	neuron death in response to oxidative stress	3/834	17/16374	0.0525122	0.343775	0.307855	ATF4/SLC7A11/CTNNB1	3
GO:0043330	response to exogenous dsRNA	3/834	17/16374	0.0525122	0.343775	0.307855	DHX36/DDX21/NFKBIA	3
GO:0043367	CD4-positive, alpha-beta T cell differentiation	3/834	17/16374	0.0525122	0.343775	0.307855	CBFB/SH3RF1/RUNX1	3
GO:0043923	positive regulation by host of viral transcription	3/834	17/16374	0.0525122	0.343775	0.307855	CHD1/CCNT1/NUCKS1	3
GO:0070131	positive regulation of mitochondrial translation	3/834	17/16374	0.0525122	0.343775	0.307855	UQCC1/FASTKD2/TRMT10C	3
GO:2000811	negative regulation of anoikis	3/834	17/16374	0.0525122	0.343775	0.307855	PTRH2/MCL1/ITGB1	3
GO:0019079	viral genome replication	8/834	81/16374	0.0536497	0.350605	0.313972	RAD23A/VCP/PPID/ADAR/PLSCR1/PABPC1/PPIA/ILF3	8
GO:0072593	reactive oxygen species metabolic process	11/834	125/16374	0.0540982	0.352917	0.316042	CRYAB/NDUFAF2/VDAC1/SESN2/SLC25A33/CDKN1A/TP53/GADD45A/ATG5/TRAP1/TGFBR2	11
GO:0098813	nuclear chromosome segregation	5/834	41/16374	0.0558245	0.363542	0.325557	SMC5/TENT4A/ZNF207/GEM/FBXW7	5
GO:0001764	neuron migration	12/834	141/16374	0.0562492	0.365669	0.327461	NRCAM/SH3RF1/FGFR1/SPOCK1/STAT3/ADGRL3/ARHGEF2/CRK/MAP1B/CTNNB1/SATB2/FLNA	12
GO:0018209	peptidyl-serine modification	10/834	111/16374	0.0565615	0.367059	0.328706	CD44/MAPKAP1/HSP90AA1/TXN/RPTOR/RACK1/HSP90AB1/RAF1/FNIP2/PAQR3	10
GO:0033138	positive regulation of peptidyl-serine phosphorylation	8/834	82/16374	0.0569249	0.367156	0.328793	CD44/MAPKAP1/HSP90AA1/TXN/RPTOR/HSP90AB1/RAF1/FNIP2	8
GO:0006294	nucleotide-excision repair, preincision complex assembly	4/834	29/16374	0.0577164	0.367156	0.328793	UBB/UBC/CCNH/RPS27A	4
GO:0043001	Golgi to plasma membrane protein transport	4/834	29/16374	0.0577164	0.367156	0.328793	RACK1/GOLGA4/RAB31/ACSL3	4
GO:0046661	male sex differentiation	4/834	29/16374	0.0577164	0.367156	0.328793	LHFPL2/FKBP4/CTNNB1/SMAD5	4
GO:2000145	regulation of cell motility	4/834	29/16374	0.0577164	0.367156	0.328793	ROCK2/ABL2/RAF1/DAPK3	4
GO:0007599	hemostasis	12/834	142/16374	0.0587375	0.367156	0.328793	SERPINE2/PDPN/GNB1/RAF1/PLSCR1/VAV3/ANXA7/YWHAZ/DGKE/DGKD/FLNA/MERTK	12
GO:0000027	ribosomal large subunit assembly	2/834	8/16374	0.0591392	0.367156	0.328793	MRTO4/RPL38	2
GO:0018243	protein O-linked glycosylation via threonine	2/834	8/16374	0.0591392	0.367156	0.328793	GALNT13/GALNT2	2
GO:0021955	central nervous system neuron axonogenesis	2/834	8/16374	0.0591392	0.367156	0.328793	HSP90AA1/HSP90AB1	2
GO:0032042	mitochondrial DNA metabolic process	2/834	8/16374	0.0591392	0.367156	0.328793	LONP1/SESN2	2
GO:0034333	adherens junction assembly	2/834	8/16374	0.0591392	0.367156	0.328793	TBCD/CTNNB1	2
GO:0035331	negative regulation of hippo signaling	2/834	8/16374	0.0591392	0.367156	0.328793	WWC1/DLG5	2
GO:0035860	glial cell-derived neurotrophic factor receptor signaling pathway	2/834	8/16374	0.0591392	0.367156	0.328793	SULF2/GDF15	2
GO:0044387	negative regulation of protein kinase activity by regulation of protein phosphorylation	2/834	8/16374	0.0591392	0.367156	0.328793	NPM1/ADAR	2
GO:0045008	depyrimidination	2/834	8/16374	0.0591392	0.367156	0.328793	OGG1/MBD4	2
GO:0051764	actin crosslink formation	2/834	8/16374	0.0591392	0.367156	0.328793	BAIAP2/FLNA	2
GO:0060261	positive regulation of transcription initiation from RNA polymerase II promoter	2/834	8/16374	0.0591392	0.367156	0.328793	DHX36/TAF1	2
GO:0060484	lung-associated mesenchyme development	2/834	8/16374	0.0591392	0.367156	0.328793	FGFR1/CTNNB1	2
GO:0060977	coronary vasculature morphogenesis	2/834	8/16374	0.0591392	0.367156	0.328793	SETD2/SPRED1	2
GO:0071312	cellular response to alkaloid	2/834	8/16374	0.0591392	0.367156	0.328793	MDM2/BCL2L1	2
GO:0075713	establishment of integrated proviral latency	2/834	8/16374	0.0591392	0.367156	0.328793	XRCC5/PPIA	2
GO:0090091	positive regulation of extracellular matrix disassembly	2/834	8/16374	0.0591392	0.367156	0.328793	PDPN/DDR2	2
GO:0090269	fibroblast growth factor production	2/834	8/16374	0.0591392	0.367156	0.328793	FGFR1/ROCK2	2
GO:0090279	regulation of calcium ion import	2/834	8/16374	0.0591392	0.367156	0.328793	WNK3/CTNNB1	2
GO:0090650	cellular response to oxygen-glucose deprivation	2/834	8/16374	0.0591392	0.367156	0.328793	NAMPT/ATF4	2
GO:0097428	protein maturation by iron-sulfur cluster transfer	2/834	8/16374	0.0591392	0.367156	0.328793	GLRX3/FAM96B	2
GO:0042127	regulation of cell population proliferation	10/834	112/16374	0.0594147	0.368253	0.329775	BIRC6/CHST11/KCNH1/MBD2/NFKBIA/SLC7A11/ARHGEF2/GNL3/SAT1/TGFBR2	10
GO:0042775	mitochondrial ATP synthesis coupled electron transport	8/834	83/16374	0.0603243	0.368901	0.330356	UQCRFS1/NDUFB2/COX7B/UQCRC2/UQCR10/NDUFA4/NDUFS6/NDUFA10	8
GO:0003094	glomerular filtration	3/834	18/16374	0.0607077	0.368901	0.330356	SULF2/XPNPEP3/MYO1E	3
GO:0007250	activation of NF-kappaB-inducing kinase activity	3/834	18/16374	0.0607077	0.368901	0.330356	CHI3L1/TNFRSF10B/MAP3K7	3
GO:0034063	stress granule assembly	3/834	18/16374	0.0607077	0.368901	0.330356	G3BP1/EIF2S1/RPS23	3
GO:0035458	cellular response to interferon-beta	3/834	18/16374	0.0607077	0.368901	0.330356	CAPN2/PNPT1/UBE2G2	3
GO:0042276	error-prone translesion synthesis	3/834	18/16374	0.0607077	0.368901	0.330356	UBB/UBC/RPS27A	3
GO:0042789	mRNA transcription by RNA polymerase II	3/834	18/16374	0.0607077	0.368901	0.330356	ATF4/STAT3/FLNA	3
GO:0046470	phosphatidylcholine metabolic process	3/834	18/16374	0.0607077	0.368901	0.330356	LDLR/CAPN2/ACSL3	3
GO:0060317	cardiac epithelial to mesenchymal transition	3/834	18/16374	0.0607077	0.368901	0.330356	ACVR1/TGFB2/TGFBR2	3
GO:0071404	cellular response to low-density lipoprotein particle stimulus	3/834	18/16374	0.0607077	0.368901	0.330356	LDLR/ABCA1/ITGB1	3
GO:1904706	negative regulation of vascular smooth muscle cell proliferation	3/834	18/16374	0.0607077	0.368901	0.330356	HMOX1/CDKN1A/GSTP1	3
GO:2000773	negative regulation of cellular senescence	3/834	18/16374	0.0607077	0.368901	0.330356	NAMPT/PRKDC/HMGA2	3
GO:0006754	ATP biosynthetic process	5/834	42/16374	0.0608307	0.369046	0.330486	STAT3/VCP/TMSB4X/ENO1/ATP5ME	5
GO:0006369	termination of RNA polymerase II transcription	4/834	30/16374	0.0640237	0.386529	0.346142	SNRPG/SNRPD3/SLBP/NUDT21	4
GO:0032008	positive regulation of TOR signaling	4/834	30/16374	0.0640237	0.386529	0.346142	RPTOR/RHEB/RRAGD/LAMTOR1	4
GO:1902895	positive regulation of pri-miRNA transcription by RNA polymerase II	4/834	30/16374	0.0640237	0.386529	0.346142	STAT3/TP53/GNL3/TGFB2	4
GO:0030521	androgen receptor signaling pathway	6/834	56/16374	0.0643326	0.387765	0.347249	GRIP1/FKBP4/UBE3A/NRIP1/CTNNB1/RNF4	6
GO:0008104	protein localization	20/834	273/16374	0.065833	0.395755	0.354404	NRCAM/SQSTM1/HSP90AA1/CTTN/RAB3GAP2/DNAJB6/BIN3/RACK1/TP53/NPM1/HSP90AB1/SEC23IP/ARFGAP3/ARHGEF2/HAP1/CLTC/CYLD/STX18/STAM/FBXW7	20
GO:0042771	intrinsic apoptotic signaling pathway in response to DNA damage by p53 class mediator	5/834	43/16374	0.066083	0.395755	0.354404	CD44/RPS27L/CDKN1A/TP53/RPL26	5
GO:0050804	modulation of chemical synaptic transmission	5/834	43/16374	0.066083	0.395755	0.354404	STAT3/ITGB1/SLC7A11/DGKE/CACNA1A	5
GO:0051145	smooth muscle cell differentiation	5/834	43/16374	0.066083	0.395755	0.354404	ACVR1/MKL1/MED28/NFATC3/CTNNB1	5
GO:0060348	bone development	8/834	85/16374	0.0674983	0.403581	0.361413	ANKRD11/SULF2/TMEM38B/AKAP13/TP53/CHSY1/SH3PXD2B/SMAD5	8
GO:0090090	negative regulation of canonical Wnt signaling pathway	13/834	161/16374	0.0677203	0.40426	0.36202	PSME4/RAPGEF1/G3BP1/PSMD1/PSMA7/PSMD14/PSMB4/PSMB1/PSMD12/WWTR1/CYLD/PSMB7/PSMD5	13
GO:0060326	cell chemotaxis	7/834	71/16374	0.0689962	0.409392	0.366616	HSPB1/ADAM17/IL6R/BCAR1/TMSB4X/CRK/GSTP1	7
GO:0035338	long-chain fatty-acyl-CoA biosynthetic process	3/834	19/16374	0.0694592	0.409392	0.366616	ELOVL5/ACSL3/HSD17B12	3
GO:0045995	regulation of embryonic development	3/834	19/16374	0.0694592	0.409392	0.366616	DHX36/NOCT/LAMA3	3
GO:0048025	negative regulation of mRNA splicing, via spliceosome	3/834	19/16374	0.0694592	0.409392	0.366616	SFSWAP/HNRNPA2B1/RNPS1	3
GO:0072132	mesenchyme morphogenesis	3/834	19/16374	0.0694592	0.409392	0.366616	ACVR1/TGFB2/TGFBR2	3
GO:0098656	anion transmembrane transport	3/834	19/16374	0.0694592	0.409392	0.366616	SLC4A7/VDAC1/ABCA1	3
GO:0099175	regulation of postsynapse organization	3/834	19/16374	0.0694592	0.409392	0.366616	NRCAM/HSPA8/NRP2	3
GO:0101023	vascular endothelial cell proliferation	3/834	19/16374	0.0694592	0.409392	0.366616	ADAM17/FGFR1/STAT3	3
GO:0006259	DNA metabolic process	13/834	162/16374	0.070378	0.411518	0.36852	SMG6/DHX36/SMCHD1/XRCC5/CDKN1A/CEBPG/THOC1/KPNA1/WRN/ASCC3/NUCKS1/GNL3/EYA3	13
GO:0006378	mRNA polyadenylation	4/834	31/16374	0.070676	0.411518	0.36852	HSF1/CCNT1/NUDT21/PABPC1	4
GO:0007093	mitotic cell cycle checkpoint	4/834	31/16374	0.070676	0.411518	0.36852	MAP3K20/BCL2L1/RPS6/RPL24	4
GO:0009409	response to cold	4/834	31/16374	0.070676	0.411518	0.36852	HSPD1/HSP90AA1/ZNF516/ATP2B1	4
GO:1903955	positive regulation of protein targeting to mitochondrion	4/834	31/16374	0.070676	0.411518	0.36852	USP36/UBE2D3/ARIH2/FBXW7	4
GO:2001240	negative regulation of extrinsic apoptotic signaling pathway in absence of ligand	4/834	31/16374	0.070676	0.411518	0.36852	HSPA1A/MCL1/BCL2L1/STRADB	4
GO:0051276	chromosome organization	16/834	210/16374	0.070684	0.411518	0.36852	BUD23/CHD2/SMC5/HNRNPU/BRD4/SS18L1/NPM1/HMGA2/ZNF830/NUCKS1/TENT4A/DAPK3/WAPL/GEM/RBBP7/FBXW7	16
GO:0071346	cellular response to interferon-gamma	11/834	131/16374	0.0708142	0.411518	0.36852	CAMK2D/CD44/VIM/ACTG1/EPRS/GBP2/TP53/MT2A/RPL13A/DAPK3/TRIM25	11
GO:1901796	regulation of signal transduction by p53 class mediator	11/834	131/16374	0.0708142	0.411518	0.36852	MDM2/RBBP8/TAF1/TAF15/TP53/TAF7/WRN/ATR/CSNK2A1/RBBP7/TRIM24	11
GO:0034446	substrate adhesion-dependent cell spreading	8/834	86/16374	0.0712738	0.413544	0.370334	PDPN/LAMC1/ACTN4/RAB1A/CRK/WASHC2C/FLNA/MERTK	8
GO:0044265	cellular macromolecule catabolic process	5/834	44/16374	0.0715801	0.414031	0.37077	MDM2/HSP90AA1/LONP1/CAPN2/CTSL	5
GO:0070534	protein K63-linked ubiquitination	5/834	44/16374	0.0715801	0.414031	0.37077	UBE2E2/TRIM56/ARIH2/UBE2B/RNF4	5
GO:0000096	sulfur amino acid metabolic process	2/834	9/16374	0.0735282	0.414361	0.371066	MTR/SLC7A11	2
GO:0000722	telomere maintenance via recombination	2/834	9/16374	0.0735282	0.414361	0.371066	NSMCE2/SMC5	2
GO:0006474	N-terminal protein amino acid acetylation	2/834	9/16374	0.0735282	0.414361	0.371066	NAA15/NAA50	2
GO:0008090	retrograde axonal transport	2/834	9/16374	0.0735282	0.414361	0.371066	HAP1/TMEM108	2
GO:0032463	negative regulation of protein homooligomerization	2/834	9/16374	0.0735282	0.414361	0.371066	CRYAB/RIOK3	2
GO:0032836	glomerular basement membrane development	2/834	9/16374	0.0735282	0.414361	0.371066	SULF2/MYO1E	2
GO:0035562	negative regulation of chromatin binding	2/834	9/16374	0.0735282	0.414361	0.371066	BTAF1/WAPL	2
GO:0048263	determination of dorsal identity	2/834	9/16374	0.0735282	0.414361	0.371066	ACVR1/CTNNB1	2
GO:0048703	embryonic viscerocranium morphogenesis	2/834	9/16374	0.0735282	0.414361	0.371066	CHST11/MTHFD1L	2
GO:0050931	pigment cell differentiation	2/834	9/16374	0.0735282	0.414361	0.371066	ADAMTS9/CD63	2
GO:0061549	sympathetic ganglion development	2/834	9/16374	0.0735282	0.414361	0.371066	CTNNB1/NRP2	2
GO:0071225	cellular response to muramyl dipeptide	2/834	9/16374	0.0735282	0.414361	0.371066	VIM/ARHGEF2	2
GO:0071394	cellular response to testosterone stimulus	2/834	9/16374	0.0735282	0.414361	0.371066	SPP1/ROCK2	2
GO:1903506	regulation of nucleic acid-templated transcription	2/834	9/16374	0.0735282	0.414361	0.371066	ACTN4/SND1	2
GO:1904667	negative regulation of ubiquitin protein ligase activity	2/834	9/16374	0.0735282	0.414361	0.371066	RPS7/RPL23	2
GO:1990314	cellular response to insulin-like growth factor stimulus	2/834	9/16374	0.0735282	0.414361	0.371066	SLC25A33/CRK	2
GO:1990416	cellular response to brain-derived neurotrophic factor stimulus	2/834	9/16374	0.0735282	0.414361	0.371066	UBE3A/TMEM108	2
GO:0070059	intrinsic apoptotic signaling pathway in response to endoplasmic reticulum stress	6/834	58/16374	0.0737697	0.415094	0.371723	TNFRSF10B/HSPA1A/ATF4/TP53/BCL2L1/DNAJC10	6
GO:0071495	cellular response to endogenous stimulus	18/834	245/16374	0.0762102	0.42818	0.383441	ACVR1/RAPGEF1/UBE2D3/GDF15/UBB/FGFR1/HNRNPF/TP53/MAP3K7/UBC/ADAM9/POLR2B/TGFB2/GTF2F2/TGFBR2/SPRED1/RPS27A/SMAD5	18
GO:0038066	p38MAPK cascade	5/834	45/16374	0.0773199	0.433126	0.38787	PJA2/GADD45A/MAPKAPK2/CYLD/MAP3K4	5
GO:0007264	small GTPase mediated signal transduction	19/834	262/16374	0.0773231	0.433126	0.38787	SQSTM1/MAPKAP1/SIPA1L2/RAPGEF1/SIPA1L3/HMOX1/DOCK6/AKAP13/TRIO/ARHGAP24/ARHGAP10/ARHGEF2/EPHB2/RAB18/VAV3/ARHGAP29/MYO9B/TGFB2/SRGAP1	19
GO:0007029	endoplasmic reticulum organization	4/834	32/16374	0.0776669	0.433403	0.388118	RAB3GAP2/TMEM38B/GAK/STX18	4
GO:0032835	glomerulus development	4/834	32/16374	0.0776669	0.433403	0.388118	SULF2/ANGPT2/MYO1E/WWTR1	4
GO:0007265	Ras protein signal transduction	18/834	246/16374	0.078523	0.433403	0.388118	SQSTM1/MAPKAP1/RAPGEF1/G3BP1/CDKN1A/AKAP13/TP53/TRIO/GNB1/ITGB1/ABL2/RAF1/ARHGEF2/EPHB2/VAV3/CRK/MYO9B/TGFB2	18
GO:0030850	prostate gland development	3/834	20/16374	0.0787433	0.433403	0.388118	FKBP4/UBE3A/CTNNB1	3
GO:0032211	negative regulation of telomere maintenance via telomerase	3/834	20/16374	0.0787433	0.433403	0.388118	HNRNPC/HNRNPU/NAT10	3
GO:0034067	protein localization to Golgi apparatus	3/834	20/16374	0.0787433	0.433403	0.388118	GAK/IFT20/PAQR3	3
GO:0044319	wound healing, spreading of cells	3/834	20/16374	0.0787433	0.433403	0.388118	CD44/PDPN/FLNA	3
GO:0070741	response to interleukin-6	3/834	20/16374	0.0787433	0.433403	0.388118	CHI3L1/IL6R/STAT3	3
GO:0071385	cellular response to glucocorticoid stimulus	3/834	20/16374	0.0787433	0.433403	0.388118	ANXA1/HNRNPU/GSTP1	3
GO:1902017	regulation of cilium assembly	3/834	20/16374	0.0787433	0.433403	0.388118	ATG5/IFT20/CYLD	3
GO:0032436	positive regulation of proteasomal ubiquitin-dependent protein catabolic process	6/834	59/16374	0.0787688	0.433403	0.388118	MDM2/TAF1/HSPA1A/RAD23A/RACK1/VCP	6
GO:0033627	cell adhesion mediated by integrin	6/834	59/16374	0.0787688	0.433403	0.388118	PIEZO1/ADAM17/ITGB1/ADAM9/CRK/TGFB2	6
GO:0007059	chromosome segregation	8/834	88/16374	0.0792034	0.43451	0.38911	SMC5/FAM96B/NEK6/ZNF207/GEM/UBE2I/RIOK3/ARL8B	8
GO:0060333	interferon-gamma-mediated signaling pathway	8/834	88/16374	0.0792034	0.43451	0.38911	CAMK2D/CD44/GBP2/TP53/MT2A/HSP90AB1/TRIM25/PARP14	8
GO:0051092	positive regulation of NF-kappaB transcription factor activity	12/834	150/16374	0.0812884	0.445293	0.398766	IRAK2/HSPA1A/UBB/TRIM52/STAT3/IL1RAP/NPM1/MAP3K7/UBC/ARHGEF2/TRIM25/RPS27A	12
GO:0016310	phosphorylation	26/834	382/16374	0.0815718	0.446189	0.399569	SQSTM1/PRKDC/HSP90AA1/PTGES3/WARS/HSPB1/FAM129A/ADAM17/SEPHS2/RACK1/STAT3/DYNLL1/SESN2/VCP/SLC25A33/CDKN1A/PRKRIP1/ROCK2/PPP5C/EPHB2/FNIP2/PAQR3/SDCBP/WWTR1/DNAJC10/ANKLE2	26
GO:0006757	ATP generation from ADP	7/834	74/16374	0.0821891	0.448907	0.402002	NUP214/STAT3/RANBP2/NUP98/NUP58/NUP153/NUP107	7
GO:0016358	dendrite development	9/834	104/16374	0.0831236	0.453057	0.405719	TRAK2/GRIP1/MEF2A/HPRT1/SS18L1/ITGB1/EPHB2/BAIAP2/CRK	9
GO:0061614	pri-miRNA transcription by RNA polymerase II	5/834	46/16374	0.0832998	0.453057	0.405719	STAT3/TP53/GNL3/TGFB2/NFATC3	5
GO:0016043	cellular component organization	15/834	199/16374	0.0839124	0.453057	0.405719	NRCAM/SERPINE2/SQSTM1/TMEM38B/NPLOC4/HNRNPU/HSPA8/SEC23IP/RAB1A/GAK/BAIAP2/SERP1/TRAPPC11/LAMTOR1/NRP2	15
GO:0014070	response to organic cyclic compound	6/834	60/16374	0.0839535	0.453057	0.405719	NAMPT/SLC7A11/PLIN2/ACSL3/ANGPT2/ANXA7	6
GO:0034330	cell junction organization	6/834	60/16374	0.0839535	0.453057	0.405719	RAPGEF1/IGSF9B/IL1RAP/VCP/CAST/ETV5	6
GO:0048011	neurotrophin TRK receptor signaling pathway	4/834	33/16374	0.0849892	0.453057	0.405719	BCAR1/RAF1/HAP1/TMEM108	4
GO:0060425	lung morphogenesis	4/834	33/16374	0.0849892	0.453057	0.405719	STK40/DLG5/TGFBR2/CTNNB1	4
GO:0090503	RNA phosphodiester bond hydrolysis, exonucleolytic	4/834	33/16374	0.0849892	0.453057	0.405719	PNPT1/NOCT/XRN2/PARN	4
GO:0048511	rhythmic process	9/834	105/16374	0.0870416	0.453057	0.405719	PRKDC/RACK1/FBXW11/ROCK2/CREM/NOCT/UBE3A/CSNK2A1/FBXW7	9
GO:0048762	mesenchymal cell differentiation	9/834	105/16374	0.0870416	0.453057	0.405719	PDPN/FGFR1/STRAP/HMGA2/TGFB2/TGFBR2/CTNNB1/SDCBP/WWTR1	9
GO:0048699	generation of neurons	17/834	233/16374	0.0871511	0.453057	0.405719	NRCAM/SH3RF1/FGFR1/SPOCK1/ATF4/TENT2/ADGRL3/NAPA/XRN2/CRK/MAP1B/DAPK3/TGFB2/CTNNB1/CHD7/SATB2/ADNP2	17
GO:0002063	chondrocyte development	3/834	21/16374	0.0885349	0.453057	0.405719	CHST11/SULF2/CHSY1	3
GO:0003283	atrial septum development	3/834	21/16374	0.0885349	0.453057	0.405719	ACVR1/MDM2/TGFB2	3
GO:0006309	apoptotic DNA fragmentation	3/834	21/16374	0.0885349	0.453057	0.405719	KPNB1/HSF1/KPNA1	3
GO:0007041	lysosomal transport	3/834	21/16374	0.0885349	0.453057	0.405719	VPS53/ARF1/HSPA1A	3
GO:0008361	regulation of cell size	3/834	21/16374	0.0885349	0.453057	0.405719	LARS/RPTOR/VAV3	3
GO:0031290	retinal ganglion cell axon guidance	3/834	21/16374	0.0885349	0.453057	0.405719	NRCAM/EPHB2/RPL24	3
GO:0035710	CD4-positive, alpha-beta T cell activation	3/834	21/16374	0.0885349	0.453057	0.405719	CBFB/SH3RF1/RUNX1	3
GO:0036499	PERK-mediated unfolded protein response	3/834	21/16374	0.0885349	0.453057	0.405719	ATF4/ASNS/EIF2S1	3
GO:0060416	response to growth hormone	3/834	21/16374	0.0885349	0.453057	0.405719	STAT3/CACYBP/PNPT1	3
GO:0071887	leukocyte apoptotic process	3/834	21/16374	0.0885349	0.453057	0.405719	SLC7A11/TCP1/MERTK	3
GO:0120192	tight junction assembly	3/834	21/16374	0.0885349	0.453057	0.405719	CBFB/ROCK2/RUNX1	3
GO:0001776	leukocyte homeostasis	2/834	10/16374	0.088893	0.453057	0.405719	ANXA1/MERTK	2
GO:0002431	Fc receptor mediated stimulatory signaling pathway	2/834	10/16374	0.088893	0.453057	0.405719	RAPGEF1/PLSCR1	2
GO:0003149	membranous septum morphogenesis	2/834	10/16374	0.088893	0.453057	0.405719	TGFB2/TGFBR2	2
GO:0006878	cellular copper ion homeostasis	2/834	10/16374	0.088893	0.453057	0.405719	ARF1/MT2A	2
GO:0006930	substrate-dependent cell migration, cell extension	2/834	10/16374	0.088893	0.453057	0.405719	CTTN/SDCBP	2
GO:0010225	response to UV-C	2/834	10/16374	0.088893	0.453057	0.405719	WRN/MAP3K4	2
GO:0010452	histone H3-K36 methylation	2/834	10/16374	0.088893	0.453057	0.405719	IWS1/BRD4	2
GO:0018242	protein O-linked glycosylation via serine	2/834	10/16374	0.088893	0.453057	0.405719	GALNT13/GALNT2	2
GO:0032206	positive regulation of telomere maintenance	2/834	10/16374	0.088893	0.453057	0.405719	DHX36/GNL3	2
GO:0034244	negative regulation of transcription elongation from RNA polymerase II promoter	2/834	10/16374	0.088893	0.453057	0.405719	HNRNPU/EAPP	2
GO:0044539	long-chain fatty acid import into cell	2/834	10/16374	0.088893	0.453057	0.405719	EPRS/ACSL3	2
GO:0045637	regulation of myeloid cell differentiation	2/834	10/16374	0.088893	0.453057	0.405719	CBFB/RUNX1	2
GO:0045741	positive regulation of epidermal growth factor-activated receptor activity	2/834	10/16374	0.088893	0.453057	0.405719	ADAM17/FBXW7	2
GO:0045945	positive regulation of transcription by RNA polymerase III	2/834	10/16374	0.088893	0.453057	0.405719	RPTOR/ICE1	2
GO:0046660	female sex differentiation	2/834	10/16374	0.088893	0.453057	0.405719	LHFPL2/CHD7	2
GO:0060338	regulation of type I interferon-mediated signaling pathway	2/834	10/16374	0.088893	0.453057	0.405719	ABCE1/HSP90AB1	2
GO:0060439	trachea morphogenesis	2/834	10/16374	0.088893	0.453057	0.405719	TGFBR2/CTNNB1	2
GO:0061951	establishment of protein localization to plasma membrane	2/834	10/16374	0.088893	0.453057	0.405719	RACK1/ACSL3	2
GO:0070508	cholesterol import	2/834	10/16374	0.088893	0.453057	0.405719	LDLR/LAMTOR1	2
GO:0071243	cellular response to arsenic-containing substance	2/834	10/16374	0.088893	0.453057	0.405719	HMOX1/MKNK2	2
GO:0071481	cellular response to X-ray	2/834	10/16374	0.088893	0.453057	0.405719	HMGA2/NUCKS1	2
GO:0080171	lytic vacuole organization	2/834	10/16374	0.088893	0.453057	0.405719	ARF1/TMEM165	2
GO:0097050	type B pancreatic cell apoptotic process	2/834	10/16374	0.088893	0.453057	0.405719	CAST/EIF2S1	2
GO:1903265	positive regulation of tumor necrosis factor-mediated signaling pathway	2/834	10/16374	0.088893	0.453057	0.405719	HSPA1A/ADAM17	2
GO:2000304	positive regulation of ceramide biosynthetic process	2/834	10/16374	0.088893	0.453057	0.405719	NSMAF/RACK1	2
GO:2001028	positive regulation of endothelial cell chemotaxis	2/834	10/16374	0.088893	0.453057	0.405719	HSPB1/TMSB4X	2
GO:0010507	negative regulation of autophagy	5/834	47/16374	0.0895168	0.453057	0.405719	NAMPT/LARS/STAT3/MCL1/FOXK2	5
GO:0016050	vesicle organization	5/834	47/16374	0.0895168	0.453057	0.405719	ANXA1/ANXA2/RAB39A/SDCBP/STAM	5
GO:0048146	positive regulation of fibroblast proliferation	5/834	47/16374	0.0895168	0.453057	0.405719	PRKDC/S100A6/CDKN1A/DDR2/WAPL	5
GO:0060389	pathway-restricted SMAD protein phosphorylation	5/834	47/16374	0.0895168	0.453057	0.405719	ACVR1/STRAP/TGFB2/TGFBR2/SDCBP	5
GO:0120163	negative regulation of cold-induced thermogenesis	5/834	47/16374	0.0895168	0.453057	0.405719	ADAM17/ATF4/RHEB/NRDC/NOVA1	5
GO:1904888	cranial skeletal system development	5/834	47/16374	0.0895168	0.453057	0.405719	SETD2/TGFB2/TGFBR2/CTNNB1/SH3PXD2B	5
GO:0034613	cellular protein localization	17/834	234/16374	0.089769	0.453717	0.40631	HSP90AA1/CTTN/RAB3GAP2/CD63/NPM1/HSP90AB1/SEC23IP/ARFGAP3/ARHGEF2/CLTC/ASTN2/CTNNB1/CYLD/RRAGD/STX18/STAM/LAMTOR1	17
GO:0035239	tube morphogenesis	21/834	301/16374	0.0899411	0.453971	0.406538	NRCAM/WARS/HMOX1/NAA15/EPAS1/FGFR1/ANXA2/ARHGAP24/GLUL/SETD2/EPHB2/ANGPT2/MYO1E/VAV3/SCG2/SAT1/TGFB2/GJC1/TGFBR2/NRP2/FBXW7	21
GO:0034329	cell junction assembly	9/834	106/16374	0.0910676	0.458415	0.410517	VMP1/RAPGEF1/ACTG1/IL1RAP/ADGRL3/ACTB/EPHB2/DLG5/FLNA	9
GO:0046907	intracellular transport	9/834	106/16374	0.0910676	0.458415	0.410517	CRYAB/ARF1/HMOX1/ANXA2/GAB2/WWC1/ICE1/MAP1B/STX18	9
GO:0006890	retrograde vesicle-mediated transport, Golgi to endoplasmic reticulum	7/834	76/16374	0.091736	0.459915	0.41186	RER1/NAPA/RAB1A/ARFGAP3/COPB2/COPA/STX18	7
GO:0016052	carbohydrate catabolic process	7/834	76/16374	0.091736	0.459915	0.41186	NUP214/STAT3/RANBP2/NUP98/NUP58/NUP153/NUP107	7
GO:0051170	import into nucleus	7/834	76/16374	0.091736	0.459915	0.41186	BAG3/SNRPD1/SNRPG/IPO5/NUP58/SNRPD3/FLNA	7
GO:0061351	neural precursor cell proliferation	8/834	91/16374	0.0920428	0.460085	0.412013	RAPGEF1/TP53/VEGFC/DIXDC1/ORC3/IFT20/CTNNB1/FLNA	8
GO:0006284	base-excision repair	4/834	34/16374	0.0926346	0.460085	0.412013	TP53/HMGA2/WRN/OGG1	4
GO:0034383	low-density lipoprotein particle clearance	4/834	34/16374	0.0926346	0.460085	0.412013	HMOX1/LDLR/ANXA2/CLTC	4
GO:0035924	cellular response to vascular endothelial growth factor stimulus	4/834	34/16374	0.0926346	0.460085	0.412013	HSPB1/ANXA1/MAPKAPK2/NRP2	4
GO:0043276	anoikis	4/834	34/16374	0.0926346	0.460085	0.412013	PTRH2/MCL1/ITGB1/MAP3K7	4
GO:0043388	positive regulation of DNA binding	4/834	34/16374	0.0926346	0.460085	0.412013	TXN/EDF1/CEBPG/WAPL	4
GO:0060612	adipose tissue development	4/834	34/16374	0.0926346	0.460085	0.412013	ZNF516/SPART/SH3PXD2B/ARID5B	4
GO:0030308	negative regulation of cell growth	10/834	122/16374	0.0930862	0.461713	0.41347	SERPINE2/CRYAB/HSPA1A/RACK1/SESN2/CDKN1A/TP53/ENO1/TGFB2/RBBP7	10
GO:0050817	coagulation	11/834	138/16374	0.0940933	0.466087	0.417387	SERPINE2/PDPN/GNB1/RAF1/PLSCR1/VAV3/YWHAZ/DGKE/DGKD/FLNA/MERTK	11
GO:0007565	female pregnancy	12/834	154/16374	0.0943616	0.466796	0.418022	NAMPT/VMP1/FKBP4/HSF1/CAPN2/SPP1/APOL2/RPL29/ANGPT2/KPNA6/PCSK5/TGFBR2	12
GO:0009267	cellular response to starvation	6/834	62/16374	0.094874	0.467468	0.418624	MAP1LC3B/MARS/AMBRA1/HSPA8/GLUL/WRN	6
GO:0040008	regulation of growth	6/834	62/16374	0.094874	0.467468	0.418624	GAP43/MORF4L2/HMGA2/BCL2L1/OPA3/TKT	6
GO:0050727	regulation of inflammatory response	6/834	62/16374	0.094874	0.467468	0.418624	IL1R1/ANXA1/SBNO2/BRD4/TMSB4X/CYLD	6
GO:0001837	epithelial to mesenchymal transition	9/834	107/16374	0.0952015	0.468462	0.419514	PDPN/STRAP/HMGA2/DLG5/TGFB2/TGFBR2/CTNNB1/SDCBP/WWTR1	9
GO:0034620	cellular response to unfolded protein	5/834	48/16374	0.095967	0.470365	0.421218	BAG3/HSF1/HSPA1A/VCP/ATF6	5
GO:0048008	platelet-derived growth factor receptor signaling pathway	5/834	48/16374	0.095967	0.470365	0.421218	RAPGEF1/BCAR1/MYO1E/IFT20/ARID5B	5
GO:0051298	centrosome duplication	5/834	48/16374	0.095967	0.470365	0.421218	CHORDC1/XPO1/ROCK2/NPM1/CEP192	5
GO:0022617	extracellular matrix disassembly	7/834	77/16374	0.0967326	0.473494	0.42402	CD44/PDPN/CAPN2/LAMC1/DDR2/CTSL/SH3PXD2B	7
GO:0000715	nucleotide-excision repair, DNA damage recognition	3/834	22/16374	0.0988071	0.479865	0.429726	UBB/UBC/RPS27A	3
GO:0000717	nucleotide-excision repair, DNA duplex unwinding	3/834	22/16374	0.0988071	0.479865	0.429726	UBB/UBC/RPS27A	3
GO:0009314	response to radiation	3/834	22/16374	0.0988071	0.479865	0.429726	TXN/ANGPT2/OGG1	3
GO:0010613	positive regulation of cardiac muscle hypertrophy	3/834	22/16374	0.0988071	0.479865	0.429726	CAMK2D/MEF2A/ROCK2	3
GO:0035909	aorta morphogenesis	3/834	22/16374	0.0988071	0.479865	0.429726	ADAMTS9/TGFB2/CHD7	3
GO:1901223	negative regulation of NIK/NF-kappaB signaling	3/834	22/16374	0.0988071	0.479865	0.429726	FBXW11/TMSB4X/CYLD	3
GO:0048667	cell morphogenesis involved in neuron differentiation	9/834	108/16374	0.0994428	0.482323	0.431927	NRCAM/TRAK2/S100A6/MEF2A/HPRT1/ITGB1/TBCD/BAIAP2/PITPNA	9
GO:0006361	transcription initiation from RNA polymerase I promoter	4/834	35/16374	0.100594	0.483356	0.432852	TAF1D/POLR1A/RRN3/CCNH	4
GO:0006401	RNA catabolic process	4/834	35/16374	0.100594	0.483356	0.432852	LRPPRC/PNPT1/XRN2/PABPC4	4
GO:0030177	positive regulation of Wnt signaling pathway	4/834	35/16374	0.100594	0.483356	0.432852	SULF2/MBD2/DIXDC1/CSNK2A1	4
GO:0035051	cardiocyte differentiation	4/834	35/16374	0.100594	0.483356	0.432852	ACVR1/DHX36/HNRNPU/TGFB2	4
GO:0042177	negative regulation of protein catabolic process	4/834	35/16374	0.100594	0.483356	0.432852	SERPINE2/SF3B3/SNX3/FLNA	4
GO:0070266	necroptotic process	4/834	35/16374	0.100594	0.483356	0.432852	TRPM7/TP53/ARHGEF2/CYLD	4
GO:0048207	vesicle targeting, rough ER to cis-Golgi	6/834	63/16374	0.100606	0.483356	0.432852	SEC31A/PPP6R3/NAPA/SEC23IP/RAB1A/TRAPPC10	6
GO:0006367	transcription initiation from RNA polymerase II promoter	13/834	172/16374	0.100694	0.483356	0.432852	DHX36/CBFB/MED6/TAF1/TAF15/CDKN1A/TP53/TAF7/MED27/POLR2B/GTF2F2/CCNH/WWTR1	13
GO:0048534	hematopoietic or lymphoid organ development	8/834	93/16374	0.101228	0.485113	0.434425	CBFB/SIPA1L3/TENT2/TP53/CEBPD/ADAR/ARIH2/RUNX1	8
GO:0000956	nuclear-transcribed mRNA catabolic process	7/834	78/16374	0.101876	0.485113	0.434425	DHX36/NOCT/DHX34/PABPC1/PARN/TENT4A/HBS1L	7
GO:0031623	receptor internalization	7/834	78/16374	0.101876	0.485113	0.434425	ARF1/CD63/RAB31/ITGB1/ATAD1/CLTC/SDCBP	7
GO:0032418	lysosome localization	5/834	49/16374	0.102646	0.485113	0.434425	HMOX1/PLEKHM1/GAB2/ARL8B/LAMTOR1	5
GO:0060395	SMAD protein signal transduction	5/834	49/16374	0.102646	0.485113	0.434425	VIM/GDF15/TGFB2/WWTR1/SMAD5	5
GO:0050900	leukocyte migration	14/834	189/16374	0.102887	0.485113	0.434425	CD44/HMOX1/TNFRSF10B/SLC7A5/ADAM17/IL6R/ANXA1/ITGB1/ATP1B3/SLC7A6/SLC7A11/ANGPT2/PPIA/MERTK	14
GO:0051259	protein complex oligomerization	9/834	109/16374	0.103791	0.485113	0.434425	CAMK2D/CRYAB/RACK1/TP53/ZNHIT6/NPM1/TRAPPC10/TRAPPC11/RIOK3	9
GO:0000185	activation of MAPKKK activity	2/834	11/16374	0.105097	0.485113	0.434425	MAP4K5/GADD45A	2
GO:0000959	mitochondrial RNA metabolic process	2/834	11/16374	0.105097	0.485113	0.434425	LRPPRC/PNPT1	2
GO:0001780	neutrophil homeostasis	2/834	11/16374	0.105097	0.485113	0.434425	ANXA1/MERTK	2
GO:0002328	pro-B cell differentiation	2/834	11/16374	0.105097	0.485113	0.434425	PRKDC/NUDT21	2
GO:0006111	regulation of gluconeogenesis	2/834	11/16374	0.105097	0.485113	0.434425	SESN2/RANBP2	2
GO:0031581	hemidesmosome assembly	2/834	11/16374	0.105097	0.485113	0.434425	LAMC1/LAMA3	2
GO:0032204	regulation of telomere maintenance	2/834	11/16374	0.105097	0.485113	0.434425	SMG6/XRCC5	2
GO:0034379	very-low-density lipoprotein particle assembly	2/834	11/16374	0.105097	0.485113	0.434425	ARF1/ACSL3	2
GO:0035457	cellular response to interferon-alpha	2/834	11/16374	0.105097	0.485113	0.434425	IFIT2/IFIT3	2
GO:0043374	CD8-positive, alpha-beta T cell differentiation	2/834	11/16374	0.105097	0.485113	0.434425	CBFB/RUNX1	2
GO:0043517	positive regulation of DNA damage response, signal transduction by p53 class mediator	2/834	11/16374	0.105097	0.485113	0.434425	ATR/SPRED1	2
GO:0045176	apical protein localization	2/834	11/16374	0.105097	0.485113	0.434425	NAPA/DLG5	2
GO:0050855	regulation of B cell receptor signaling pathway	2/834	11/16374	0.105097	0.485113	0.434425	CBFB/RUNX1	2
GO:0050930	induction of positive chemotaxis	2/834	11/16374	0.105097	0.485113	0.434425	VEGFC/SCG2	2
GO:0051188	cofactor biosynthetic process	2/834	11/16374	0.105097	0.485113	0.434425	STAT3/SLC7A11	2
GO:0051775	response to redox state	2/834	11/16374	0.105097	0.485113	0.434425	RNF7/SLC7A11	2
GO:0055015	ventricular cardiac muscle cell development	2/834	11/16374	0.105097	0.485113	0.434425	MEF2A/ATG5	2
GO:0061430	bone trabecula morphogenesis	2/834	11/16374	0.105097	0.485113	0.434425	FBN2/SBNO2	2
GO:0070988	demethylation	2/834	11/16374	0.105097	0.485113	0.434425	POR/OTUD4	2
GO:0071372	cellular response to follicle-stimulating hormone stimulus	2/834	11/16374	0.105097	0.485113	0.434425	GCLM/POR	2
GO:1901222	regulation of NIK/NF-kappaB signaling	2/834	11/16374	0.105097	0.485113	0.434425	NFKBIA/TMSB4X	2
GO:1904263	positive regulation of TORC1 signaling	2/834	11/16374	0.105097	0.485113	0.434425	LARS/RRAGD	2
GO:2000637	positive regulation of gene silencing by miRNA	2/834	11/16374	0.105097	0.485113	0.434425	STAT3/FXR1	2
GO:2000648	positive regulation of stem cell proliferation	2/834	11/16374	0.105097	0.485113	0.434425	HNRNPU/HMGA2	2
GO:0009790	embryo development	8/834	94/16374	0.106007	0.487499	0.436562	DHX36/MBD2/HSF1/TP53/NOCT/LAMA3/SATB2/SMAD5	8
GO:0048675	axon extension	8/834	94/16374	0.106007	0.487499	0.436562	NRCAM/HSP90AA1/CTTN/GOLGA4/HSP90AB1/ITGB1/WDR36/MAP1B	8
GO:1905114	cell surface receptor signaling pathway involved in cell-cell signaling	8/834	94/16374	0.106007	0.487499	0.436562	SULF2/CBFB/MBD2/RACK1/DIXDC1/RUNX1/CSNK2A1/SNX3	8
GO:0048208	COPII vesicle coating	6/834	64/16374	0.106516	0.489238	0.43812	SEC31A/PPP6R3/NAPA/SEC23IP/RAB1A/TRAPPC10	6
GO:0030029	actin filament-based process	9/834	110/16374	0.108246	0.495837	0.444029	ARF1/BIN3/ROCK2/BCAR1/TMSB4X/DIXDC1/ARHGEF2/BAIAP2/CRK	9
GO:0072657	protein localization to membrane	9/834	110/16374	0.108246	0.495837	0.444029	SQSTM1/RER1/BCL2L1/ITGB1/ACTB/EPHB2/CLTC/WNK3/SH3PXD2B	9
GO:0006513	protein monoubiquitination	4/834	36/16374	0.108857	0.495837	0.444029	UBE2D3/UBB/UBE2B/TRIM25	4
GO:0035987	endodermal cell differentiation	4/834	36/16374	0.108857	0.495837	0.444029	HMGA2/SETD2/LAMA3/CTNNB1	4
GO:0006297	nucleotide-excision repair, DNA gap filling	3/834	23/16374	0.109532	0.495837	0.444029	UBB/UBC/RPS27A	3
GO:0006929	substrate-dependent cell migration	3/834	23/16374	0.109532	0.495837	0.444029	CTTN/VEGFC/SDCBP	3
GO:0051674	localization of cell	3/834	23/16374	0.109532	0.495837	0.444029	CTTN/ADAM17/ACTB	3
GO:0071157	negative regulation of cell cycle arrest	3/834	23/16374	0.109532	0.495837	0.444029	MDM2/HSP90AB1/RPL23	3
GO:0098586	cellular response to virus	3/834	23/16374	0.109532	0.495837	0.444029	ARF1/ADAR/RIOK3	3
GO:0043525	positive regulation of neuron apoptotic process	5/834	50/16374	0.10955	0.495837	0.444029	ATF4/NQO1/TP53/TGFB2/CTNNB1	5
GO:0051604	protein maturation	5/834	50/16374	0.10955	0.495837	0.444029	SERPINE2/HSPD1/MDM2/SERPINH1/LDLRAD3	5
GO:1903078	positive regulation of protein localization to plasma membrane	5/834	50/16374	0.10955	0.495837	0.444029	SQSTM1/RER1/ITGB1/EPHB2/WNK3	5
GO:1990778	protein localization to cell periphery	8/834	95/16374	0.110907	0.496029	0.444201	SQSTM1/RER1/BCL2L1/ITGB1/ACTB/EPHB2/CLTC/WNK3	8
GO:0007266	Rho protein signal transduction	12/834	159/16374	0.112401	0.496029	0.444201	PDPN/ABCA1/AKAP13/TRIO/ROCK2/ITGB1/ABL2/RAF1/ARHGEF2/VAV3/ARHGAP29/MYO9B	12
GO:0003281	ventricular septum development	6/834	65/16374	0.112602	0.496029	0.444201	ACVR1/MDM2/HECTD1/TGFB2/DCTN5/TGFBR2	6
GO:0042752	regulation of circadian rhythm	6/834	65/16374	0.112602	0.496029	0.444201	PRKDC/ROCK2/CREM/NOCT/UBE3A/FBXW7	6
GO:0051056	regulation of small GTPase mediated signal transduction	11/834	143/16374	0.113236	0.496029	0.444201	SIPA1L2/SIPA1L3/AKAP13/TRIO/ARHGAP24/ARHGAP10/ARHGEF2/VAV3/ARHGAP29/MYO9B/SRGAP1	11
GO:0045766	positive regulation of angiogenesis	10/834	127/16374	0.113456	0.496029	0.444201	CHI3L1/HMOX1/HSPB1/STAT3/ADAM12/HMGA2/ITGB1/ANGPT2/RUNX1/TGFBR2	10
GO:0033077	T cell differentiation in thymus	5/834	51/16374	0.116673	0.496029	0.444201	PRKDC/ADAM17/TP53/RPS6/CTNNB1	5
GO:0006493	protein O-linked glycosylation	4/834	37/16374	0.117414	0.496029	0.444201	TRAK2/GALNT2/GALNT7/GALNT18	4
GO:0051262	protein tetramerization	4/834	37/16374	0.117414	0.496029	0.444201	TRPM7/TP53/NUDT21/RPS19	4
GO:2001244	positive regulation of intrinsic apoptotic signaling pathway	4/834	37/16374	0.117414	0.496029	0.444201	RACK1/TP53/BCL2L1/SIAH1	4
GO:0050794	regulation of cellular process	10/834	128/16374	0.117809	0.496029	0.444201	ACVR1/GRIP1/RGS6/GPC6/RGS17/VAV3/CRK/YWHAG/MTCH1/STAM	10
GO:0070925	organelle assembly	21/834	312/16374	0.117835	0.496029	0.444201	GAP43/HSP90AA1/RAB3GAP2/G3BP1/ACTG1/DYNLL1/MRTO4/RAB39A/ITGB1/ATG5/ARHGEF2/RPS19/CEP192/TCTN3/IFT20/YWHAG/SDCBP/CYLD/STX18/RNF4/STAM	21
GO:0030901	midbrain development	7/834	81/16374	0.118177	0.496029	0.444201	MAPKAP1/TAF1/FGFR1/DYNLL1/ACTB/DLG5/CTNNB1	7
GO:0060964	regulation of gene silencing by miRNA	7/834	81/16374	0.118177	0.496029	0.444201	NUP214/RANBP2/NUP98/NUP58/NUP153/NUP107/POLR2B	7
GO:0007420	brain development	20/834	295/16374	0.118332	0.496029	0.444201	PRKDC/BAG3/XRCC5/TAF1/FGFR1/DNAJB1/NAPA/ATP2B1/UBE3A/WRN/SLC7A11/SETD2/ACSL3/RAB18/HAP1/BAIAP2/DLG5/SPATA5/TGFBR2/CTNNB1	20
GO:0001678	cellular glucose homeostasis	3/834	24/16374	0.120682	0.496029	0.444201	FOXK2/RAF1/NUCKS1	3
GO:0002053	positive regulation of mesenchymal cell proliferation	3/834	24/16374	0.120682	0.496029	0.444201	FGFR1/TGFBR2/CTNNB1	3
GO:0010586	miRNA metabolic process	3/834	24/16374	0.120682	0.496029	0.444201	TENT2/PNPT1/XPO5	3
GO:0014808	release of sequestered calcium ion into cytosol by sarcoplasmic reticulum	3/834	24/16374	0.120682	0.496029	0.444201	CAMK2D/TMEM38B/CHD7	3
GO:0030111	regulation of Wnt signaling pathway	3/834	24/16374	0.120682	0.496029	0.444201	CBFB/RUNX1/SNX3	3
GO:0043044	ATP-dependent chromatin remodeling	3/834	24/16374	0.120682	0.496029	0.444201	MBD2/HNRNPC/ACTB	3
GO:0055072	iron ion homeostasis	3/834	24/16374	0.120682	0.496029	0.444201	FTL/HMOX1/EPAS1	3
GO:0062009	secondary palate development	3/834	24/16374	0.120682	0.496029	0.444201	TGFB2/TGFBR2/CHD7	3
GO:0002690	positive regulation of leukocyte chemotaxis	2/834	12/16374	0.122015	0.496029	0.444201	ADAM17/IL6R	2
GO:0010002	cardioblast differentiation	2/834	12/16374	0.122015	0.496029	0.444201	DHX36/TGFB2	2
GO:0016226	iron-sulfur cluster assembly	2/834	12/16374	0.122015	0.496029	0.444201	HSPA9/FAM96B	2
GO:0021554	optic nerve development	2/834	12/16374	0.122015	0.496029	0.444201	EPHB2/RPL24	2
GO:0030157	pancreatic juice secretion	2/834	12/16374	0.122015	0.496029	0.444201	COPA/WNK3	2
GO:0031115	negative regulation of microtubule polymerization	2/834	12/16374	0.122015	0.496029	0.444201	FKBP4/TBCD	2
GO:0032727	positive regulation of interferon-alpha production	2/834	12/16374	0.122015	0.496029	0.444201	HSPD1/SETD2	2
GO:0032968	positive regulation of transcription elongation from RNA polymerase II promoter	2/834	12/16374	0.122015	0.496029	0.444201	BRD4/EAPP	2
GO:0036037	CD8-positive, alpha-beta T cell activation	2/834	12/16374	0.122015	0.496029	0.444201	CBFB/RUNX1	2
GO:0045078	positive regulation of interferon-gamma biosynthetic process	2/834	12/16374	0.122015	0.496029	0.444201	CD276/CEBPG	2
GO:0046475	glycerophospholipid catabolic process	2/834	12/16374	0.122015	0.496029	0.444201	LDLR/PRDX6	2
GO:0046834	lipid phosphorylation	2/834	12/16374	0.122015	0.496029	0.444201	DGKE/DGKD	2
GO:0048333	mesodermal cell differentiation	2/834	12/16374	0.122015	0.496029	0.444201	HMGA2/ITGB1	2
GO:0048644	muscle organ morphogenesis	2/834	12/16374	0.122015	0.496029	0.444201	SERP1/ARID5B	2
GO:0051549	positive regulation of keratinocyte migration	2/834	12/16374	0.122015	0.496029	0.444201	EPB41L4B/ADAM9	2
GO:0060396	growth hormone receptor signaling pathway	2/834	12/16374	0.122015	0.496029	0.444201	GDF15/STAT3	2
GO:0071340	skeletal muscle acetylcholine-gated channel clustering	2/834	12/16374	0.122015	0.496029	0.444201	RER1/ETV5	2
GO:0071786	endoplasmic reticulum tubular network organization	2/834	12/16374	0.122015	0.496029	0.444201	RAB3GAP2/RAB18	2
GO:0071888	macrophage apoptotic process	2/834	12/16374	0.122015	0.496029	0.444201	CTSL/TCP1	2
GO:0090110	COPII-coated vesicle cargo loading	2/834	12/16374	0.122015	0.496029	0.444201	SEC31A/RAB1A	2
GO:0098751	bone cell development	2/834	12/16374	0.122015	0.496029	0.444201	FAM20C/FBXW7	2
GO:2000036	regulation of stem cell population maintenance	2/834	12/16374	0.122015	0.496029	0.444201	HMGA2/ELAVL1	2
GO:0072659	protein localization to plasma membrane	14/834	195/16374	0.12356	0.496029	0.444201	SQSTM1/RER1/ROCK2/BCL2L1/ITGB1/ACTB/ATP1B3/EPHB2/GAK/CLTC/WNK3/IFT20/NFASC/FLNA	14
GO:0043086	negative regulation of catalytic activity	5/834	52/16374	0.12401	0.496029	0.444201	NQO1/ANXA2/ANXA5/FAF2/FNIP2	5
GO:0070830	bicellular tight junction assembly	5/834	52/16374	0.12401	0.496029	0.444201	CBFB/ROCK2/ACTN4/TBCD/RUNX1	5
GO:0090114	COPII-coated vesicle budding	6/834	67/16374	0.125286	0.496029	0.444201	SEC31A/PPP6R3/NAPA/SEC23IP/RAB1A/TRAPPC10	6
GO:0014897	striated muscle hypertrophy	4/834	38/16374	0.126253	0.496029	0.444201	CAMK2D/MEF2A/ROCK2/GLRX3	4
GO:0030501	positive regulation of bone mineralization	4/834	38/16374	0.126253	0.496029	0.444201	ACVR1/FBN2/ATP2B1/FAM20C	4
GO:0032623	interleukin-2 production	4/834	38/16374	0.126253	0.496029	0.444201	ANXA1/IL1RAP/MAP3K7/RUNX1	4
GO:0033683	nucleotide-excision repair, DNA incision	4/834	38/16374	0.126253	0.496029	0.444201	UBB/UBC/OGG1/RPS27A	4
GO:0035329	hippo signaling	4/834	38/16374	0.126253	0.496029	0.444201	PJA2/WWC1/DLG5/WWTR1	4
GO:0099173	postsynapse organization	4/834	38/16374	0.126253	0.496029	0.444201	NRCAM/HSPA8/EPHB2/NRP2	4
GO:0002224	toll-like receptor signaling pathway	8/834	98/16374	0.126333	0.496029	0.444201	IRAK2/PJA2/UBQLN1/TRAF3/CTSL/RPS6KA3/OTUD4/MAPKAPK2	8
GO:0007568	aging	14/834	197/16374	0.130947	0.496029	0.444201	NAMPT/MBD2/LONP1/STAT3/GCLM/NQO1/CACYBP/TP53/ATP2B1/WRN/EIF2S1/PRDM2/OGG1/TGFBR2	14
GO:0006471	protein ADP-ribosylation	3/834	25/16374	0.132227	0.496029	0.444201	PUM3/WARS/PARP14	3
GO:0060384	innervation	3/834	25/16374	0.132227	0.496029	0.444201	SERPINE2/SULF2/CHD7	3
GO:1900740	positive regulation of protein insertion into mitochondrial membrane involved in apoptotic signaling pathway	3/834	25/16374	0.132227	0.496029	0.444201	TP53/YWHAZ/YWHAG	3
GO:0010631	epithelial cell migration	11/834	148/16374	0.134441	0.496029	0.444201	ADAMTS9/STRAP/EPB41L4B/ROCK2/BCAR1/GLUL/ADAM9/DNAJA4/TGFB2/TGFBR2/NRP2	11
GO:0006354	DNA-templated transcription, elongation	4/834	39/16374	0.135361	0.496029	0.444201	THOC1/HNRNPU/BRD4/EAPP	4
GO:0048286	lung alveolus development	4/834	39/16374	0.135361	0.496029	0.444201	TMEM38B/STK40/SLC7A11/MAN2A1	4
GO:0001822	kidney development	10/834	132/16374	0.136131	0.496029	0.444201	SULF2/ODC1/NUP107/PCSK5/DLG5/IFT20/TGFB2/CTNNB1/WWTR1/ARID5B	10
GO:0030324	lung development	10/834	132/16374	0.136131	0.496029	0.444201	CHI3L1/TMEM38B/PDPN/STK40/EPAS1/FGFR1/SLC7A11/MAN2A1/CTNNB1/FBXW7	10
GO:0008543	fibroblast growth factor receptor signaling pathway	8/834	100/16374	0.137205	0.496029	0.444201	SULF2/FGFR1/HNRNPF/POLR2B/GTF2F2/CTNNB1/SPRED1/FAM20C	8
GO:0035264	multicellular organism growth	11/834	149/16374	0.138923	0.496029	0.444201	ANKRD11/GDF15/HSF1/STK40/STAT3/TP53/NDUFS6/WWTR1/SH3PXD2B/CHD7/ARID5B	11
GO:0002042	cell migration involved in sprouting angiogenesis	5/834	54/16374	0.1393	0.496029	0.444201	HMOX1/ANXA1/ITGB1/SPRED1/FBXW7	5
GO:0001818	negative regulation of cytokine production	2/834	13/16374	0.139532	0.496029	0.444201	ATP2B1/MERTK	2
GO:0003179	heart valve morphogenesis	2/834	13/16374	0.139532	0.496029	0.444201	ADAMTS9/TGFB2	2
GO:0010745	negative regulation of macrophage derived foam cell differentiation	2/834	13/16374	0.139532	0.496029	0.444201	ABCA1/NFKBIA	2
GO:0010863	positive regulation of phospholipase C activity	2/834	13/16374	0.139532	0.496029	0.444201	FGFR1/ABL2	2
GO:0015909	long-chain fatty acid transport	2/834	13/16374	0.139532	0.496029	0.444201	EPRS/PLIN2	2
GO:0016246	RNA interference	2/834	13/16374	0.139532	0.496029	0.444201	ADAR/XPO5	2
GO:0030048	actin filament-based movement	2/834	13/16374	0.139532	0.496029	0.444201	MYO1E/MYO9B	2
GO:0030201	heparan sulfate proteoglycan metabolic process	2/834	13/16374	0.139532	0.496029	0.444201	SULF2/CTNNB1	2
GO:0032802	low-density lipoprotein particle receptor catabolic process	2/834	13/16374	0.139532	0.496029	0.444201	ANXA2/CLTC	2
GO:0042790	nucleolar large rRNA transcription by RNA polymerase I	2/834	13/16374	0.139532	0.496029	0.444201	MARS/H2AFY	2
GO:0043101	purine-containing compound salvage	2/834	13/16374	0.139532	0.496029	0.444201	HPRT1/DGUOK	2
GO:0043508	negative regulation of JUN kinase activity	2/834	13/16374	0.139532	0.496029	0.444201	DNAJA1/GSTP1	2
GO:0046685	response to arsenic-containing substance	2/834	13/16374	0.139532	0.496029	0.444201	CDKN1A/RNF4	2
GO:0051123	RNA polymerase II preinitiation complex assembly	2/834	13/16374	0.139532	0.496029	0.444201	TAF1/TP53	2
GO:0051457	maintenance of protein location in nucleus	2/834	13/16374	0.139532	0.496029	0.444201	HNRNPU/SKP1	2
GO:0070208	protein heterotrimerization	2/834	13/16374	0.139532	0.496029	0.444201	GNB1/NUP58	2
GO:1990403	embryonic brain development	2/834	13/16374	0.139532	0.496029	0.444201	RPL10/CTNNB1	2
GO:2000810	regulation of bicellular tight junction assembly	2/834	13/16374	0.139532	0.496029	0.444201	CBFB/RUNX1	2
GO:2001034	positive regulation of double-strand break repair via nonhomologous end joining	2/834	13/16374	0.139532	0.496029	0.444201	PRKDC/SMCHD1	2
GO:2001224	positive regulation of neuron migration	2/834	13/16374	0.139532	0.496029	0.444201	ARHGEF2/FLNA	2
GO:0007205	protein kinase C-activating G protein-coupled receptor signaling pathway	3/834	26/16374	0.144138	0.496029	0.444201	GAP43/DGKE/DGKD	3
GO:0015980	energy derivation by oxidation of organic compounds	3/834	26/16374	0.144138	0.496029	0.444201	NDUFAF2/PNPT1/TRAP1	3
GO:0050769	positive regulation of neurogenesis	3/834	26/16374	0.144138	0.496029	0.444201	XRCC5/HAP1/MAN2A1	3
GO:0070911	global genome nucleotide-excision repair	3/834	26/16374	0.144138	0.496029	0.444201	UBB/UBC/RPS27A	3
GO:0071158	positive regulation of cell cycle arrest	3/834	26/16374	0.144138	0.496029	0.444201	TP53/HMGA2/RPL23	3
GO:0001974	blood vessel remodeling	4/834	40/16374	0.144727	0.496029	0.444201	MDM2/EPAS1/ATG5/CHD7	4
GO:0006509	membrane protein ectodomain proteolysis	4/834	40/16374	0.144727	0.496029	0.444201	BACE2/ADAM17/NRDC/ADAM9	4
GO:0000290	deadenylation-dependent decapping of nuclear-transcribed mRNA	1/834	3/16374	0.145161	0.496029	0.444201	NOCT	1
GO:0000447	endonucleolytic cleavage in ITS1 to separate SSU-rRNA from 5.8S rRNA and LSU-rRNA from tricistronic rRNA transcript (SSU-rRNA, 5.8S rRNA, LSU-rRNA)	1/834	3/16374	0.145161	0.496029	0.444201	UTP20	1
GO:0000738	DNA catabolic process, exonucleolytic	1/834	3/16374	0.145161	0.496029	0.444201	XRN2	1
GO:0000958	mitochondrial mRNA catabolic process	1/834	3/16374	0.145161	0.496029	0.444201	PNPT1	1
GO:0001546	preantral ovarian follicle growth	1/834	3/16374	0.145161	0.496029	0.444201	ZNF830	1
GO:0001887	selenium compound metabolic process	1/834	3/16374	0.145161	0.496029	0.444201	TXNRD1	1
GO:0002378	immunoglobulin biosynthetic process	1/834	3/16374	0.145161	0.496029	0.444201	GALNT2	1
GO:0002424	T cell mediated immune response to tumor cell	1/834	3/16374	0.145161	0.496029	0.444201	HSPD1	1
GO:0002685	regulation of leukocyte migration	1/834	3/16374	0.145161	0.496029	0.444201	ANXA1	1
GO:0003056	regulation of vascular smooth muscle contraction	1/834	3/16374	0.145161	0.496029	0.444201	ATP2B1	1
GO:0003275	apoptotic process involved in outflow tract morphogenesis	1/834	3/16374	0.145161	0.496029	0.444201	TGFB2	1
GO:0003340	negative regulation of mesenchymal to epithelial transition involved in metanephros morphogenesis	1/834	3/16374	0.145161	0.496029	0.444201	CTNNB1	1
GO:0006432	phenylalanyl-tRNA aminoacylation	1/834	3/16374	0.145161	0.496029	0.444201	FARSB	1
GO:0006458	'de novo' protein folding	1/834	3/16374	0.145161	0.496029	0.444201	HSPD1	1
GO:0006546	glycine catabolic process	1/834	3/16374	0.145161	0.496029	0.444201	GLDC	1
GO:0007161	calcium-independent cell-matrix adhesion	1/834	3/16374	0.145161	0.496029	0.444201	ITGB1	1
GO:0009069	serine family amino acid metabolic process	1/834	3/16374	0.145161	0.496029	0.444201	SLC7A11	1
GO:0009165	nucleotide biosynthetic process	1/834	3/16374	0.145161	0.496029	0.444201	DGUOK	1
GO:0009447	putrescine catabolic process	1/834	3/16374	0.145161	0.496029	0.444201	SAT1	1
GO:0010664	negative regulation of striated muscle cell apoptotic process	1/834	3/16374	0.145161	0.496029	0.444201	BAG3	1
GO:0010693	negative regulation of alkaline phosphatase activity	1/834	3/16374	0.145161	0.496029	0.444201	TGFB2	1
GO:0010766	negative regulation of sodium ion transport	1/834	3/16374	0.145161	0.496029	0.444201	SERPINE2	1
GO:0010874	regulation of cholesterol efflux	1/834	3/16374	0.145161	0.496029	0.444201	LAMTOR1	1
GO:0010909	positive regulation of heparan sulfate proteoglycan biosynthetic process	1/834	3/16374	0.145161	0.496029	0.444201	CTNNB1	1
GO:0010966	regulation of phosphate transport	1/834	3/16374	0.145161	0.496029	0.444201	FGFR1	1
GO:0014839	myoblast migration involved in skeletal muscle regeneration	1/834	3/16374	0.145161	0.496029	0.444201	BIN3	1
GO:0014916	regulation of lung blood pressure	1/834	3/16374	0.145161	0.496029	0.444201	NAMPT	1
GO:0015966	diadenosine tetraphosphate biosynthetic process	1/834	3/16374	0.145161	0.496029	0.444201	GARS	1
GO:0016189	synaptic vesicle to endosome fusion	1/834	3/16374	0.145161	0.496029	0.444201	EEA1	1
GO:0016553	base conversion or substitution editing	1/834	3/16374	0.145161	0.496029	0.444201	ADAR	1
GO:0017187	peptidyl-glutamic acid carboxylation	1/834	3/16374	0.145161	0.496029	0.444201	VKORC1L1	1
GO:0019184	nonribosomal peptide biosynthetic process	1/834	3/16374	0.145161	0.496029	0.444201	SLC7A11	1
GO:0019673	GDP-mannose metabolic process	1/834	3/16374	0.145161	0.496029	0.444201	GUK1	1
GO:0021553	olfactory nerve development	1/834	3/16374	0.145161	0.496029	0.444201	CHD7	1
GO:0021828	gonadotrophin-releasing hormone neuronal migration to the hypothalamus	1/834	3/16374	0.145161	0.496029	0.444201	NRP2	1
GO:0021869	forebrain ventricular zone progenitor cell division	1/834	3/16374	0.145161	0.496029	0.444201	DIXDC1	1
GO:0022616	DNA strand elongation	1/834	3/16374	0.145161	0.496029	0.444201	NUCKS1	1
GO:0031644	regulation of nervous system process	1/834	3/16374	0.145161	0.496029	0.444201	ROCK2	1
GO:0032273	positive regulation of protein polymerization	1/834	3/16374	0.145161	0.496029	0.444201	HSP90AA1	1
GO:0032601	connective tissue growth factor production	1/834	3/16374	0.145161	0.496029	0.444201	ROCK2	1
GO:0033024	mast cell apoptotic process	1/834	3/16374	0.145161	0.496029	0.444201	ADAM17	1
GO:0033484	nitric oxide homeostasis	1/834	3/16374	0.145161	0.496029	0.444201	GSTP1	1
GO:0034140	negative regulation of toll-like receptor 3 signaling pathway	1/834	3/16374	0.145161	0.496029	0.444201	UBQLN1	1
GO:0034315	regulation of Arp2/3 complex-mediated actin nucleation	1/834	3/16374	0.145161	0.496029	0.444201	ARF1	1
GO:0034377	plasma lipoprotein particle assembly	1/834	3/16374	0.145161	0.496029	0.444201	ABCA1	1
GO:0034625	fatty acid elongation, monounsaturated fatty acid	1/834	3/16374	0.145161	0.496029	0.444201	ELOVL5	1
GO:0035063	nuclear speck organization	1/834	3/16374	0.145161	0.496029	0.444201	DYRK3	1
GO:0035166	post-embryonic hemopoiesis	1/834	3/16374	0.145161	0.496029	0.444201	MYO1E	1
GO:0035684	helper T cell extravasation	1/834	3/16374	0.145161	0.496029	0.444201	CRK	1
GO:0035728	response to hepatocyte growth factor	1/834	3/16374	0.145161	0.496029	0.444201	CRK	1
GO:0035794	positive regulation of mitochondrial membrane permeability	1/834	3/16374	0.145161	0.496029	0.444201	TP53	1
GO:0035898	parathyroid hormone secretion	1/834	3/16374	0.145161	0.496029	0.444201	FGFR1	1
GO:0035938	estradiol secretion	1/834	3/16374	0.145161	0.496029	0.444201	SPP1	1
GO:0035986	senescence-associated heterochromatin focus assembly	1/834	3/16374	0.145161	0.496029	0.444201	HMGA2	1
GO:0036023	embryonic skeletal limb joint morphogenesis	1/834	3/16374	0.145161	0.496029	0.444201	CTNNB1	1
GO:0038172	interleukin-33-mediated signaling pathway	1/834	3/16374	0.145161	0.496029	0.444201	IL1RAP	1
GO:0042148	strand invasion	1/834	3/16374	0.145161	0.496029	0.444201	WRN	1
GO:0043331	response to dsRNA	1/834	3/16374	0.145161	0.496029	0.444201	NPM1	1
GO:0043402	glucocorticoid mediated signaling pathway	1/834	3/16374	0.145161	0.496029	0.444201	AKAP13	1
GO:0043415	positive regulation of skeletal muscle tissue regeneration	1/834	3/16374	0.145161	0.496029	0.444201	TGFBR2	1
GO:0044272	sulfur compound biosynthetic process	1/834	3/16374	0.145161	0.496029	0.444201	SLC7A11	1
GO:0044336	canonical Wnt signaling pathway involved in negative regulation of apoptotic process	1/834	3/16374	0.145161	0.496029	0.444201	CTNNB1	1
GO:0044752	response to human chorionic gonadotropin	1/834	3/16374	0.145161	0.496029	0.444201	GCLM	1
GO:0045007	depurination	1/834	3/16374	0.145161	0.496029	0.444201	OGG1	1
GO:0045069	regulation of viral genome replication	1/834	3/16374	0.145161	0.496029	0.444201	PPIA	1
GO:0045726	positive regulation of integrin biosynthetic process	1/834	3/16374	0.145161	0.496029	0.444201	TGFB2	1
GO:0046883	regulation of hormone secretion	1/834	3/16374	0.145161	0.496029	0.444201	ANXA1	1
GO:0048014	Tie signaling pathway	1/834	3/16374	0.145161	0.496029	0.444201	ANGPT2	1
GO:0048145	regulation of fibroblast proliferation	1/834	3/16374	0.145161	0.496029	0.444201	CTNNB1	1
GO:0048162	multi-layer follicle stage	1/834	3/16374	0.145161	0.496029	0.444201	ZNF830	1
GO:0051097	negative regulation of helicase activity	1/834	3/16374	0.145161	0.496029	0.444201	TP53	1
GO:0051250	negative regulation of lymphocyte activation	1/834	3/16374	0.145161	0.496029	0.444201	MERTK	1
GO:0051252	regulation of RNA metabolic process	1/834	3/16374	0.145161	0.496029	0.444201	NOVA1	1
GO:0051795	positive regulation of timing of catagen	1/834	3/16374	0.145161	0.496029	0.444201	TGFB2	1
GO:0052405	negative regulation by host of symbiont molecular function	1/834	3/16374	0.145161	0.496029	0.444201	ANXA2	1
GO:0055005	ventricular cardiac myofibril assembly	1/834	3/16374	0.145161	0.496029	0.444201	MEF2A	1
GO:0055059	asymmetric neuroblast division	1/834	3/16374	0.145161	0.496029	0.444201	ARHGEF2	1
GO:0060066	oviduct development	1/834	3/16374	0.145161	0.496029	0.444201	CTNNB1	1
GO:0060154	obsolete cellular process regulating host cell cycle in response to virus	1/834	3/16374	0.145161	0.496029	0.444201	BCL2L1	1
GO:0060212	negative regulation of nuclear-transcribed mRNA poly(A) tail shortening	1/834	3/16374	0.145161	0.496029	0.444201	TENT4A	1
GO:0060378	regulation of brood size	1/834	3/16374	0.145161	0.496029	0.444201	SH3PXD2B	1
GO:0060424	lung field specification	1/834	3/16374	0.145161	0.496029	0.444201	CTNNB1	1
GO:0060492	lung induction	1/834	3/16374	0.145161	0.496029	0.444201	CTNNB1	1
GO:0060715	syncytiotrophoblast cell differentiation involved in labyrinthine layer development	1/834	3/16374	0.145161	0.496029	0.444201	DNAJB6	1
GO:0060754	positive regulation of mast cell chemotaxis	1/834	3/16374	0.145161	0.496029	0.444201	VEGFC	1
GO:0060769	positive regulation of epithelial cell proliferation involved in prostate gland development	1/834	3/16374	0.145161	0.496029	0.444201	CTNNB1	1
GO:0060838	lymphatic endothelial cell fate commitment	1/834	3/16374	0.145161	0.496029	0.444201	PDPN	1
GO:0061033	secretion by lung epithelial cell involved in lung growth	1/834	3/16374	0.145161	0.496029	0.444201	TMEM38B	1
GO:0061101	neuroendocrine cell differentiation	1/834	3/16374	0.145161	0.496029	0.444201	BCCIP	1
GO:0061107	seminal vesicle development	1/834	3/16374	0.145161	0.496029	0.444201	SERPINE2	1
GO:0061198	fungiform papilla formation	1/834	3/16374	0.145161	0.496029	0.444201	CTNNB1	1
GO:0061548	ganglion development	1/834	3/16374	0.145161	0.496029	0.444201	NRP2	1
GO:0061739	protein lipidation involved in autophagosome assembly	1/834	3/16374	0.145161	0.496029	0.444201	ATG5	1
GO:0061740	protein targeting to lysosome involved in chaperone-mediated autophagy	1/834	3/16374	0.145161	0.496029	0.444201	HSPA8	1
GO:0070434	positive regulation of nucleotide-binding oligomerization domain containing 2 signaling pathway	1/834	3/16374	0.145161	0.496029	0.444201	HSPA1A	1
GO:0070537	histone H2A K63-linked deubiquitination	1/834	3/16374	0.145161	0.496029	0.444201	USP16	1
GO:0070562	regulation of vitamin D receptor signaling pathway	1/834	3/16374	0.145161	0.496029	0.444201	TRIM24	1
GO:0070601	centromeric sister chromatid cohesion	1/834	3/16374	0.145161	0.496029	0.444201	CTNNB1	1
GO:0070602	regulation of centromeric sister chromatid cohesion	1/834	3/16374	0.145161	0.496029	0.444201	CTNNB1	1
GO:0070682	proteasome regulatory particle assembly	1/834	3/16374	0.145161	0.496029	0.444201	PSMD5	1
GO:0070816	phosphorylation of RNA polymerase II C-terminal domain	1/834	3/16374	0.145161	0.496029	0.444201	BRD4	1
GO:0071288	cellular response to mercury ion	1/834	3/16374	0.145161	0.496029	0.444201	UBE2D3	1
GO:0071386	cellular response to corticosterone stimulus	1/834	3/16374	0.145161	0.496029	0.444201	ATP2B1	1
GO:0071492	cellular response to UV-A	1/834	3/16374	0.145161	0.496029	0.444201	PPID	1
GO:0071501	cellular response to sterol depletion	1/834	3/16374	0.145161	0.496029	0.444201	FBXW7	1
GO:0071578	zinc ion import across plasma membrane	1/834	3/16374	0.145161	0.496029	0.444201	SLC39A14	1
GO:0071962	mitotic sister chromatid cohesion, centromeric	1/834	3/16374	0.145161	0.496029	0.444201	NAA50	1
GO:0072092	ureteric bud invasion	1/834	3/16374	0.145161	0.496029	0.444201	KIF26B	1
GO:0072665	protein localization to vacuole	1/834	3/16374	0.145161	0.496029	0.444201	ROCK2	1
GO:0090128	regulation of synapse maturation	1/834	3/16374	0.145161	0.496029	0.444201	YWHAZ	1
[truncated: 2,697 more rows]

## Sheet: Fig4F Cluster1 gene &GO terms
Genes and enriched GO terms of Cluster 1 from neonatal neurogenic lineage trajectory
[truncated: 2,196 more rows]

[truncated: 3 more sheets: Fig4F  Cluster2 gene &GO terms, Fig4F Cluster3 gene &GO terms, Fig4F Cluster4 gene &GO terms]
