# Supplementary material for: Deciphering molecular heterogeneity and dynamics of human hippocampal neural stem cells at different ages and injury states
Source: eLife. 2024 Apr 12;12:RP89507. doi: 10.7554/eLife.89507 (PMC11014727; doi:10.7554/eLife.89507)
Supplement: Figure 5—source data 1. [file elife-89507-fig5-data1.xlsx]

## Sheet: Fig5F qNSC1 upregulated genes
Up-regulated genes from qNSC1 during aging
	p_val	avg_log2FC	pct.1	pct.2	p_val_adj	gene	Diff	Type
1	0	1.6783	0.829	0.401	0	ACOT11	UP	NA
2	0	2.08474	0.957	0.593	0	ATP1A2	UP	NA
3	0	1.73926	0.863	0.568	0	DNM3	UP	NA
4	0	1.73275	0.852	0.502	0	GPR75-ASB3	UP	NA
5	0	1.67499	0.87	0.517	0	ARHGEF4	UP	NA
6	0	1.75343	0.998	0.867	0	ERBB4	UP	NA
7	0	1.70695	0.773	0.305	0	IQCA1	UP	NA
8	0	2.54742	0.794	0.096	0	EPHA6	UP	NA
9	0	2.15281	0.909	0.32	0	DGKG	UP	NA
10	0	2.23387	0.814	0.21	0	ARHGAP24	UP	NA
11	0	2.42333	0.931	0.486	0	SPARCL1	UP	NA
12	0	2.01322	0.662	0.131	0	UNC5C	UP	NA
13	0	2.19277	0.759	0.078	0	ETNPPL	UP	NA
14	0	3.06788	0.709	0.006	0	LINC00499	UP	NA
15	0	1.7894	0.636	0.061	0	F11-AS1	UP	NA
16	0	2.0296	0.903	0.548	0	RANBP3L	UP	NA
17	0	2.0059	0.776	0.255	0	MEF2C-AS1	UP	NA
18	0	1.92912	0.649	0.06	0	EFNA5	UP	NA
19	0	2.34539	0.924	0.445	0	ARHGAP26	UP	NA
20	0	3.26597	0.908	0.225	0	TENM2	UP	NA
21	0	1.74522	0.588	0.029	0	FKBP5	UP	NA
22	0	2.46411	0.841	0.206	0	TPD52L1	UP	NA
23	0	1.85345	0.925	0.558	0	MAP3K5	UP	NA
24	0	1.43891	0.893	0.706	0	STXBP5	UP	NA
25	0	1.57621	0.976	0.867	0	RPS6KA2	UP	NA
26	0	1.20167	0.956	0.966	0	MKLN1	UP	NA
27	0	2.37132	0.828	0.084	0	AC027117.2	UP	NA
28	0	1.48154	0.56	0.045	0	DOCK5	UP	NA
29	0	1.31722	0.936	0.866	0	ASPH	UP	NA
30	0	1.45823	0.961	0.81	0	PREX2	UP	NA
31	0	4.19221	0.904	0.124	0	TRPM3	UP	NA
32	0	2.02682	0.896	0.435	0	PTGDS	UP	NA
33	0	2.23383	0.762	0.067	0	MRVI1	UP	NA
34	0	1.97989	0.999	0.997	0	SLC1A2	UP	NA
35	0	2.21557	0.82	0.23	0	PAMR1	UP	NA
36	0	1.58007	0.586	0.075	0	SLC39A12	UP	NA
37	0	1.95804	0.946	0.615	0	CACNB2	UP	NA
38	0	2.68874	0.989	0.626	0	NEBL	UP	NA
39	0	2.24904	0.845	0.151	0	LGI1	UP	NA
40	0	2.99561	0.576	0.018	0	HPSE2	UP	NA
41	0	3.13792	0.96	0.257	0	CNTN1	UP	NA
42	0	1.76262	0.76	0.246	0	TMEM132C	UP	NA
43	0	1.49409	0.987	0.809	0	RNF219-AS1	UP	NA
44	0	1.80207	0.831	0.397	0	CKB	UP	NA
45	0	2.76228	0.981	0.457	0	RYR3	UP	NA
46	0	0.992347	0.999	0.999	0	RORA	UP	TF
47	0	1.65626	0.775	0.324	0	ANKDD1A	UP	NA
48	0	1.31625	0.991	0.885	0	WWOX	UP	NA
49	0	2.23283	0.925	0.534	0	SLC39A11	UP	NA
50	0	1.51099	0.663	0.122	0	GRIN2C	UP	NA
51	0	3.32152	0.874	0.027	0	CABLES1	UP	NA
52	0	3.03471	0.786	0.031	0	SLC14A1	UP	NA
53	0	1.36782	0.989	0.9	0	CDH20	UP	NA
54	0	1.65257	0.808	0.443	0	ACSS1	UP	NA
55	0	1.31681	0.567	0.045	0	KIAA1755	UP	NA
56	0	1.66956	0.646	0.071	0	SDC4	UP	NA
57	0	2.69947	0.888	0.191	0	COL5A3	UP	NA
58	0	1.33037	0.571	0.05	0	LGI4	UP	NA
59	0	3.11782	0.956	0.194	0	HIF3A	UP	TF
60	0	1.59525	0.836	0.467	0	TTYH1	UP	NA
61	0	3.35448	0.812	0.174	0	MT-ND1	UP	NA
62	0	2.97976	0.778	0.199	0	MT-ND2	UP	NA
63	0	3.27578	0.847	0.327	0	MT-CO1	UP	NA
64	0	3.94799	0.851	0.232	0	MT-CO2	UP	NA
65	0	3.82028	0.867	0.246	0	MT-ATP6	UP	NA
66	0	4.21353	0.907	0.28	0	MT-CO3	UP	NA
67	0	3.58715	0.758	0.137	0	MT-ND3	UP	NA
68	0	3.94573	0.862	0.251	0	MT-ND4	UP	NA
69	0	3.35305	0.826	0.217	0	MT-CYB	UP	NA
70	1.88148e-305	0.882759	1	0.998	6.31012e-301	PCDH9	UP	NA
71	1.31327e-304	1.59398	0.812	0.457	4.40445e-300	CPEB3	UP	NA
72	4.43859e-302	0.899955	0.988	0.988	1.48862e-297	MAPK10	UP	NA
73	8.97043e-301	1.62706	0.852	0.5	3.0085e-296	GLUL	UP	NA
74	4.27804e-300	1.55253	0.794	0.446	1.43477e-295	NDRG2	UP	NA
75	2.46151e-297	1.6658	0.787	0.356	8.25541e-293	FLRT2	UP	NA
76	1.61568e-293	1.46116	0.905	0.65	5.41867e-289	PHACTR3	UP	NA
77	1.18913e-291	1.64378	0.782	0.326	3.98809e-287	LGR4	UP	NA
78	1.15711e-290	2.00474	0.589	0.101	3.88072e-286	CACNA2D3	UP	NA
79	1.63343e-288	1.24347	0.942	0.714	5.47819e-284	ABLIM1	UP	NA
80	8.55154e-287	0.901388	0.988	0.989	2.86802e-282	PARD3	UP	NA
81	1.54261e-285	1.99734	0.688	0.218	5.17359e-281	EGLN3	UP	NA
82	7.0847e-285	1.31427	0.918	0.839	2.37607e-280	SYNE1	UP	NA
83	1.40552e-283	1.26708	0.536	0.059	4.71385e-279	RAPGEF3	UP	NA
84	3.41982e-279	1.68113	0.604	0.123	1.14694e-274	PDE3B	UP	NA
85	5.47517e-273	1.55399	0.843	0.457	1.83626e-268	PCDH7	UP	NA
86	6.20275e-273	1.15701	0.476	0.023	2.08028e-268	AL160272.2	UP	NA
87	6.33845e-272	1.93004	0.475	0.023	2.12579e-267	AF279873.3	UP	NA
88	2.3805e-269	0.98546	0.993	0.984	7.98373e-265	NTRK2	UP	NA
89	9.52355e-269	1.4517	0.84	0.466	3.19401e-264	PDE7B	UP	NA
90	9.61295e-267	1.0556	0.93	0.9	3.22399e-262	FNBP1	UP	NA
91	1.59232e-263	1.51383	0.869	0.546	5.34032e-259	GNA14	UP	NA
92	1.84616e-263	1.5277	0.675	0.204	6.19164e-259	BRINP1	UP	NA
93	2.32805e-259	1.16672	0.944	0.914	7.80782e-255	AC016831.7	UP	NA
94	4.28131e-254	1.31016	0.846	0.609	1.43587e-249	FAM171A1	UP	NA
95	3.31157e-253	1.36897	0.702	0.312	1.11063e-248	KIAA0930	UP	NA
96	2.08792e-252	1.36217	0.497	0.052	7.00247e-248	AL445426.1	UP	NA
97	7.89565e-252	1.22304	0.931	0.811	2.64804e-247	ZSWIM6	UP	NA
98	2.07004e-248	0.544802	1	1	6.94249e-244	LSAMP	UP	NA
99	2.1414e-248	0.796144	0.998	0.992	7.18184e-244	NTM	UP	NA
100	5.47572e-241	1.16153	0.551	0.115	1.83645e-236	MICALL2	UP	NA
101	3.92397e-239	1.04209	0.406	0.009	1.31602e-234	RNF182	UP	NA
102	6.59831e-236	1.53385	0.808	0.535	2.21294e-231	GJA1	UP	NA
103	1.108e-235	1.05507	0.932	0.86	3.716e-231	CAMTA1	UP	NA
104	5.94254e-235	1.30591	0.619	0.196	1.99301e-230	APCDD1	UP	NA
105	1.22861e-230	1.4077	0.411	0.018	4.12052e-226	RERG	UP	NA
106	2.36247e-230	0.977028	0.983	0.958	7.92325e-226	ADCY2	UP	NA
107	2.9423e-230	1.35163	0.81	0.559	9.8679e-226	ALDH1L1	UP	NA
108	7.30708e-229	1.2951	0.659	0.265	2.45065e-224	GSN	UP	NA
109	2.89797e-224	0.997533	0.42	0.028	9.71923e-220	PPP4R4	UP	NA
110	3.79136e-222	1.67927	0.372	0.003	1.27155e-217	AQP1	UP	NA
111	7.6539e-222	1.33264	0.725	0.385	2.56696e-217	LPIN1	UP	NA
112	2.65514e-221	1.12591	0.502	0.088	8.90481e-217	ARRB1	UP	NA
113	1.58059e-218	1.26455	0.773	0.454	5.30097e-214	WWC1	UP	NA
114	5.98885e-218	1.08463	0.94	0.875	2.00854e-213	ZNRF3	UP	NA
115	2.18318e-217	1.25843	0.718	0.371	7.32196e-213	STOX1	UP	NA
116	1.8983e-215	1.28247	0.814	0.443	6.36652e-211	PDZRN3	UP	NA
117	1.5442e-214	1.28077	0.757	0.429	5.17895e-210	OTUD7A	UP	NA
118	1.94744e-213	1.19924	0.625	0.221	6.53133e-209	DLC1	UP	NA
119	5.45456e-213	1.31306	0.782	0.565	1.82935e-208	FGFR3	UP	NA
120	1.12092e-212	1.22942	0.801	0.549	3.75933e-208	CTDSPL	UP	NA
121	1.627e-212	1.14671	0.846	0.568	5.45663e-208	LINC00299	UP	NA
122	4.90112e-211	0.815681	0.355	0.003	1.64374e-206	PPP1R1B	UP	NA
123	1.14176e-210	1.33239	0.675	0.291	3.82923e-206	ADRA1A	UP	NA
124	1.64348e-210	1.09837	0.468	0.073	5.51191e-206	LCNL1	UP	NA
125	2.38427e-210	1.07078	0.436	0.05	7.99638e-206	NWD1	UP	NA
126	2.93259e-209	1.11271	0.508	0.11	9.83532e-205	AHNAK	UP	NA
127	3.1982e-208	1.18828	0.74	0.45	1.07261e-203	MTUS1	UP	NA
128	7.53201e-208	1.49594	0.727	0.383	2.52608e-203	AC087564.1	UP	NA
129	8.36916e-204	0.837085	0.922	0.932	2.80685e-199	DDX17	UP	NA
130	3.75435e-203	1.03965	0.91	0.879	1.25913e-198	PDE4DIP	UP	NA
131	2.4643e-201	1.18885	0.654	0.302	8.26476e-197	DKK3	UP	NA
132	4.84729e-201	1.32676	0.695	0.388	1.62568e-196	NPL	UP	NA
133	2.31648e-200	1.05923	0.912	0.825	7.76902e-196	MED12L	UP	NA
134	5.55381e-198	1.1741	0.603	0.229	1.86264e-193	PAPLN	UP	NA
135	1.19002e-196	1.10155	0.49	0.095	3.99109e-192	TESK2	UP	NA
136	2.17732e-196	1.08516	0.906	0.809	7.30228e-192	BCL2	UP	NA
137	2.28817e-196	1.26546	0.699	0.345	7.67406e-192	MAP7	UP	NA
138	2.91009e-194	1.16144	0.811	0.604	9.75985e-190	JARID2	UP	NA
139	7.0666e-191	1.13399	0.825	0.647	2.37e-186	RHOBTB3	UP	NA
140	5.59543e-190	1.0598	0.852	0.736	1.87659e-185	CAMK2G	UP	NA
141	4.8969e-189	1.12038	0.923	0.835	1.64232e-184	PLCB1	UP	NA
142	2.8134e-188	1.19161	0.725	0.422	9.43559e-184	TAPT1-AS1	UP	NA
143	2.5215e-186	0.736311	0.325	0.006	8.45661e-182	LYVE1	UP	NA
144	8.05381e-186	1.22205	0.355	0.021	2.70109e-181	WIF1	UP	NA
145	1.02295e-184	0.848871	0.998	0.998	3.43078e-180	CTNNA2	UP	NA
146	3.87836e-184	1.18734	0.55	0.19	1.30073e-179	GPR37L1	UP	NA
147	1.61524e-183	1.16662	0.342	0.017	5.41718e-179	DCHS2	UP	NA
148	1.89428e-180	1.46994	0.802	0.627	6.35305e-176	PDE4D	UP	NA
149	3.81265e-175	0.74642	0.342	0.022	1.27869e-170	FXYD1	UP	NA
150	7.37152e-174	1.23774	0.641	0.335	2.47226e-169	NAT8L	UP	NA
151	4.5675e-172	0.7917	0.947	0.943	1.53185e-167	SASH1	UP	NA
152	6.38193e-172	1.51781	0.487	0.126	2.14037e-167	ALDH1A1	UP	NA
153	8.47849e-172	1.07397	0.493	0.134	2.84352e-167	CCND3	UP	NA
154	3.91991e-170	1.16577	0.713	0.465	1.31466e-165	EFR3B	UP	NA
155	5.68132e-170	1.08035	0.641	0.333	1.9054e-165	PSD2	UP	NA
156	1.4378e-169	0.80341	0.371	0.044	4.82208e-165	AL121760.1	UP	NA
157	1.25362e-167	0.93655	0.893	0.855	4.2044e-163	GRAMD2B	UP	NA
158	6.59173e-167	0.972606	0.888	0.796	2.21073e-162	CACHD1	UP	NA
159	4.25175e-165	1.16848	0.7	0.45	1.42595e-160	MERTK	UP	NA
160	4.04968e-164	0.811998	0.962	0.931	1.35818e-159	CSGALNACT1	UP	NA
161	6.63466e-164	1.41783	0.782	0.606	2.22513e-159	CST3	UP	NA
162	2.52759e-163	1.15987	0.798	0.618	8.47705e-159	GAREM1	UP	NA
163	3.34062e-163	1.52045	0.508	0.173	1.12038e-158	MT-ND5	UP	NA
164	9.74053e-162	0.883076	0.304	0.013	3.26678e-157	TOGARAM2	UP	NA
165	1.13444e-161	1.07184	0.591	0.243	3.80468e-157	KIAA0319	UP	NA
166	5.63011e-161	1.22818	0.668	0.338	1.88822e-156	AC108866.1	UP	NA
167	1.38559e-160	1.10813	0.629	0.325	4.64698e-156	BCAR3	UP	NA
168	1.49976e-159	1.05418	0.765	0.577	5.02988e-155	GRAMD1C	UP	NA
169	6.81198e-159	1.10289	0.381	0.059	2.2846e-154	ALK	UP	NA
170	2.22549e-158	0.734281	0.284	0.006	7.46384e-154	PADI2	UP	NA
171	1.77806e-157	1.05664	0.624	0.331	5.96327e-153	SEMA4B	UP	NA
172	1.05218e-156	0.936114	0.472	0.14	3.52881e-152	SREBF1	UP	TF
173	2.70576e-154	0.672746	0.291	0.012	9.07456e-150	MROH7-TTC4	UP	NA
174	2.88993e-154	0.974524	0.395	0.076	9.69224e-150	NDRG1	UP	NA
175	5.11694e-151	1.19047	0.474	0.134	1.71612e-146	LINC00598	UP	NA
176	6.11344e-151	0.962044	0.486	0.161	2.05032e-146	AMER2	UP	NA
177	6.47602e-151	0.618252	0.98	0.992	2.17193e-146	DOCK4	UP	NA
178	1.05433e-149	0.585812	0.986	0.991	3.53601e-145	FMN2	UP	NA
179	1.64108e-149	1.00209	0.686	0.413	5.50385e-145	EMX2OS	UP	NA
180	8.12071e-149	0.747693	0.941	0.936	2.72352e-144	SFXN5	UP	NA
181	9.6659e-149	0.905495	0.851	0.809	3.24175e-144	ATP13A4	UP	NA
182	3.37788e-148	0.739662	0.318	0.03	1.13287e-143	MYBPC1	UP	NA
183	8.44545e-148	1.10958	0.728	0.503	2.83243e-143	NCAN	UP	NA
184	1.37284e-147	0.708112	0.347	0.047	4.60425e-143	PLIN5	UP	NA
185	4.99207e-147	0.753566	0.308	0.026	1.67424e-142	SEMA3B	UP	NA
186	6.83364e-147	1.56912	0.531	0.204	2.29187e-142	LRMDA	UP	NA
187	1.87884e-145	0.961674	0.799	0.665	6.30127e-141	CEP85L	UP	NA
188	2.05106e-144	0.726433	0.307	0.028	6.87885e-140	SEPT4	UP	NA
189	2.21534e-144	0.857812	0.864	0.828	7.42982e-140	ITSN1	UP	NA
190	2.30275e-144	0.906057	0.823	0.675	7.72297e-140	ACSBG1	UP	NA
191	1.44787e-143	0.774683	0.907	0.72	4.85586e-139	ASTN2	UP	NA
192	4.37824e-143	0.925076	0.847	0.814	1.46837e-138	PNISR	UP	NA
193	1.44185e-142	1.07254	0.7	0.491	4.83569e-138	RIN2	UP	NA
194	9.39254e-142	0.971109	0.514	0.206	3.15007e-137	CSRP1	UP	NA
195	5.83987e-141	0.582311	0.998	0.992	1.95857e-136	CADM2	UP	NA
196	1.07154e-139	1.03577	0.548	0.23	3.59374e-135	KLHL32	UP	NA
197	8.77541e-139	0.988105	0.778	0.525	2.9431e-134	GABRA2	UP	NA
198	2.24079e-138	1.0908	0.672	0.371	7.51515e-134	EYA1	UP	NA
199	4.70718e-137	0.905653	0.487	0.181	1.57869e-132	SLC18B1	UP	NA
200	6.49505e-135	0.955932	0.43	0.122	2.17831e-130	EPHA4	UP	NA
201	8.07507e-135	0.992834	0.764	0.509	2.70822e-130	RORB	UP	TF
202	1.67397e-133	0.892736	0.869	0.792	5.61414e-129	LINC00511	UP	NA
203	5.60488e-133	0.997021	0.601	0.328	1.87977e-128	CAMK2B	UP	NA
204	8.47968e-133	0.67772	0.319	0.043	2.84391e-128	KLKB1	UP	NA
205	1.49532e-132	1.44017	0.558	0.3	5.01502e-128	NKAIN2	UP	NA
206	1.99216e-132	0.688535	0.991	0.999	6.68129e-128	SLC1A3	UP	NA
207	5.32828e-131	0.965465	0.894	0.886	1.787e-126	FP671120.1	UP	NA
208	6.55669e-131	0.394693	0.998	1	2.19898e-126	CTNND2	UP	NA
209	1.23523e-130	0.707875	0.268	0.018	4.14273e-126	COL23A1	UP	NA
210	9.35806e-130	0.922395	0.305	0.038	3.13851e-125	HS3ST5	UP	NA
211	1.38327e-129	0.531532	0.998	0.999	4.6392e-125	DTNA	UP	NA
212	3.44288e-129	0.98362	0.551	0.271	1.15467e-124	SLC1A4	UP	NA
213	9.72283e-128	1.33979	0.795	0.754	3.26084e-123	DNAH7	UP	NA
214	1.58078e-127	0.920103	0.846	0.698	5.30162e-123	MAPK4	UP	NA
215	3.10987e-126	0.969205	0.616	0.308	1.04299e-121	THRB	UP	TF
216	3.8404e-126	1.17275	0.615	0.35	1.28799e-121	CA8	UP	NA
217	5.31927e-126	0.952363	0.308	0.045	1.78398e-121	MT-ND4L	UP	NA
218	5.48589e-125	1.0609	0.674	0.443	1.83986e-120	SUCLG2-AS1	UP	NA
219	6.63738e-125	1.01081	0.675	0.503	2.22604e-120	TPCN1	UP	NA
220	1.33877e-124	1.07453	0.694	0.439	4.48995e-120	ADAMTS17	UP	NA
221	2.59981e-124	0.689744	0.306	0.044	8.71923e-120	CDS1	UP	NA
222	3.24339e-124	0.883417	0.817	0.612	1.08777e-119	EPHB1	UP	NA
223	2.44925e-123	0.69687	0.32	0.052	8.2143e-119	XAF1	UP	NA
224	1.09298e-122	0.926288	0.749	0.571	3.66563e-118	EYA2	UP	NA
225	1.28374e-122	1.08111	0.751	0.657	4.3054e-118	ATP1B2	UP	NA
226	1.54754e-122	0.511733	0.22	0.002	5.19013e-118	HHATL	UP	NA
227	1.62399e-122	0.992774	0.493	0.217	5.44655e-118	METTL7A	UP	NA
228	1.99545e-122	0.721111	0.343	0.068	6.69234e-118	GREB1	UP	NA
229	2.48926e-122	1.0474	0.346	0.075	8.34849e-118	SNED1	UP	NA
230	2.53932e-120	1.13944	0.477	0.186	8.51636e-116	KCNQ3	UP	NA
231	3.95419e-120	1.13748	0.775	0.58	1.32615e-115	MACROD2	UP	NA
232	6.18674e-120	0.994797	0.517	0.229	2.07491e-115	FAM198B-AS1	UP	NA
233	7.55866e-120	1.00538	0.478	0.19	2.53502e-115	ME1	UP	NA
234	8.64279e-120	0.599987	0.275	0.031	2.89862e-115	AIFM3	UP	NA
235	1.31976e-119	0.814664	0.398	0.116	4.42621e-115	MYLK	UP	TF
236	3.24441e-119	0.84188	0.401	0.116	1.08811e-114	AC005162.3	UP	NA
237	4.99499e-119	0.505904	0.997	0.996	1.67522e-114	MAGI2	UP	NA
238	1.10953e-118	0.520043	1	0.997	3.72115e-114	GPC5	UP	NA
239	3.66773e-118	1.26838	0.865	0.77	1.23008e-113	AC002429.2	UP	NA
240	9.30557e-118	0.897884	0.823	0.74	3.1209e-113	LMO3	UP	NA
241	1.18724e-117	0.923362	0.692	0.498	3.98175e-113	LRP4	UP	NA
242	1.55506e-117	0.84255	0.873	0.906	5.21537e-113	NEO1	UP	NA
243	3.95625e-117	0.571478	0.223	0.007	1.32685e-112	RGL3	UP	NA
244	5.9197e-117	0.924153	0.753	0.653	1.98535e-112	GABBR1	UP	NA
245	1.66065e-116	0.919266	0.708	0.584	5.56949e-112	HEPACAM	UP	NA
246	2.52838e-116	0.94951	0.602	0.373	8.47968e-112	HTRA1	UP	NA
247	2.92353e-116	0.845783	0.404	0.124	9.80492e-112	AL137145.2	UP	NA
248	3.24886e-116	1.17752	0.371	0.092	1.0896e-111	AC012593.1	UP	NA
249	3.63594e-116	1.03378	0.556	0.31	1.21942e-111	PFKP	UP	NA
250	4.66387e-116	0.896116	0.565	0.32	1.56417e-111	PLXNB1	UP	NA
251	5.06089e-116	0.55225	0.204	0	1.69732e-111	LINC00500	UP	NA
252	1.38321e-115	0.561842	0.976	0.986	4.639e-111	ANK2	UP	NA
253	2.32846e-115	0.681503	0.229	0.011	7.80918e-111	GFRA1	UP	NA
254	3.21946e-115	0.75981	0.239	0.016	1.07974e-110	COL21A1	UP	NA
255	1.03377e-114	0.99202	0.758	0.643	3.46705e-110	FAM107A	UP	NA
256	1.45521e-114	0.695204	0.886	0.792	4.88049e-110	KANK1	UP	NA
257	2.51585e-114	0.866314	0.479	0.211	8.43766e-110	GPAM	UP	TF
258	2.76183e-113	1.00565	0.38	0.105	9.26262e-109	AC079760.1	UP	NA
259	4.15327e-113	0.953917	0.493	0.213	1.39292e-108	NALCN	UP	NA
260	6.49499e-113	0.433955	1	1	2.17829e-108	GPM6A	UP	NA
261	8.02561e-113	0.836852	0.814	0.753	2.69163e-108	BCKDHB	UP	NA
262	2.20474e-112	0.682328	0.269	0.034	7.39427e-108	CDH23	UP	NA
263	2.77672e-112	0.761504	0.316	0.06	9.31255e-108	AC097515.1	UP	NA
264	6.03834e-112	1.22714	0.207	0.004	2.02514e-107	ZNF98	UP	TF
265	6.1817e-112	0.857616	0.336	0.077	2.07322e-107	ZIC1	UP	TF
266	8.40267e-112	0.887966	0.27	0.035	2.81809e-107	SYNPO2	UP	NA
267	1.05095e-110	0.646416	0.253	0.026	3.52467e-106	TXNIP	UP	NA
268	1.72788e-110	0.707609	0.291	0.049	5.79496e-106	ENHO	UP	NA
269	3.75251e-110	0.921321	0.609	0.384	1.25852e-105	PLXNA2	UP	NA
270	1.50708e-109	0.526335	0.995	0.995	5.05444e-105	PITPNC1	UP	NA
271	3.25164e-109	1.10679	0.641	0.352	1.09054e-104	LINC00609	UP	NA
272	4.22877e-109	0.871868	0.37	0.105	1.41825e-104	DDIT4	UP	NA
273	5.54861e-109	0.461308	0.216	0.01	1.86089e-104	HSF4	UP	TF
274	3.0154e-108	0.536595	0.213	0.009	1.01131e-103	AC087482.1	UP	NA
275	1.4558e-107	0.71441	0.33	0.078	4.88245e-103	AC037459.2	UP	NA
276	5.17795e-107	0.741911	0.844	0.813	1.73658e-102	GLUD1	UP	NA
277	5.30562e-107	0.810758	0.443	0.174	1.7794e-102	PNPLA7	UP	NA
278	7.5495e-107	0.748973	0.403	0.142	2.53195e-102	MRPL41	UP	NA
279	1.61161e-106	0.996278	0.436	0.169	5.40501e-102	CD38	UP	NA
280	4.54164e-106	0.689321	0.87	0.849	1.52318e-101	C1orf61	UP	NA
281	1.58907e-105	0.895152	0.61	0.412	5.32942e-101	SIRPA	UP	NA
282	1.67933e-105	0.823309	0.398	0.132	5.63214e-101	SLC7A2	UP	NA
283	2.37436e-105	0.823327	0.377	0.12	7.96314e-101	CACNA1B	UP	NA
284	3.37539e-105	0.554707	0.964	0.966	1.13204e-100	FMNL2	UP	NA
285	4.9638e-105	0.959401	0.522	0.285	1.66476e-100	MRAS	UP	NA
286	1.29458e-104	1.09319	0.471	0.198	4.34176e-100	AC008014.1	UP	NA
287	1.47626e-104	0.51318	0.992	0.989	4.95107e-100	TNIK	UP	NA
288	1.9158e-104	0.517067	0.219	0.014	6.42519e-100	NTSR2	UP	NA
289	5.68451e-104	1.11714	0.609	0.362	1.90647e-99	KCNMB2-AS1	UP	NA
290	1.57859e-102	0.60606	0.923	0.911	5.29426e-98	ADD3	UP	NA
291	1.69294e-102	0.850133	0.767	0.679	5.6778e-98	ZFHX3	UP	TF
292	1.40825e-101	0.735683	0.853	0.737	4.72298e-97	KCNN3	UP	NA
293	1.77404e-101	0.914801	0.538	0.274	5.94978e-97	RBMS3	UP	NA
294	2.0503e-101	0.469727	0.209	0.012	6.87629e-97	MAL	UP	NA
295	3.21541e-101	0.819473	0.551	0.319	1.07838e-96	RASSF4	UP	NA
296	6.06324e-101	0.733146	0.338	0.091	2.03349e-96	AC069368.1	UP	NA
297	9.25838e-101	1.00359	0.531	0.313	3.10508e-96	BSG	UP	NA
298	1.75726e-100	0.569773	0.28	0.051	5.8935e-96	AL392086.1	UP	NA
299	5.1464e-100	0.884096	0.606	0.384	1.726e-95	ALOX12-AS1	UP	NA
300	5.67277e-100	0.800676	0.454	0.206	1.90253e-95	PBXIP1	UP	NA
301	9.63532e-100	0.882406	0.596	0.405	3.23149e-95	C2orf72	UP	NA
302	2.20302e-99	0.890075	0.758	0.592	7.38849e-95	LDLRAD4	UP	NA
303	2.55086e-99	0.858533	0.767	0.66	8.55506e-95	FAM182B	UP	NA
304	4.95607e-99	0.86689	0.577	0.349	1.66217e-94	FGD6	UP	NA
305	6.69821e-99	0.752353	0.811	0.689	2.24645e-94	FGD4	UP	NA
306	2.08126e-98	0.697547	0.307	0.071	6.98013e-94	RIPOR2	UP	NA
307	4.1424e-98	0.879879	0.713	0.471	1.38928e-93	FRMD5	UP	NA
308	5.12414e-98	0.77065	0.809	0.706	1.71853e-93	SLC25A18	UP	NA
309	9.68079e-98	0.868868	0.62	0.446	3.24674e-93	SNTA1	UP	NA
310	1.20744e-97	0.345056	1	1	4.04951e-93	NRG3	UP	NA
311	2.40668e-97	0.766331	0.412	0.161	8.07151e-93	CLDN10	UP	NA
312	2.49797e-96	0.455941	0.194	0.009	8.37769e-92	RNF43	UP	NA
313	8.9473e-96	0.70802	0.351	0.109	3.00075e-91	NKAIN4	UP	NA
314	3.38054e-95	0.615706	0.191	0.009	1.13376e-90	SLC24A4	UP	NA
315	3.78037e-95	0.452938	0.183	0.005	1.26786e-90	FGL1	UP	NA
316	5.70965e-95	0.743803	0.397	0.153	1.9149e-90	VSIR	UP	NA
317	6.91835e-95	0.902125	0.476	0.216	2.32028e-90	EML6	UP	NA
318	2.13395e-94	0.663074	0.234	0.03	7.15686e-90	RASL12	UP	NA
319	3.89852e-94	0.546425	0.269	0.051	1.30749e-89	CYP2J2	UP	NA
320	1.55585e-93	0.803404	0.708	0.625	5.21802e-89	BBS2	UP	NA
321	5.08972e-93	0.859483	0.56	0.368	1.70699e-88	SEC14L1	UP	NA
322	5.92536e-93	0.738073	0.781	0.774	1.98725e-88	ABI1	UP	NA
323	7.27144e-93	0.900606	0.613	0.44	2.4387e-88	SOX9	UP	TF
324	2.70302e-92	0.597222	0.315	0.086	9.06539e-88	SLC48A1	UP	NA
325	3.47087e-92	0.736628	0.335	0.1	1.16406e-87	LINC00298	UP	NA
326	4.71935e-92	0.877596	0.769	0.672	1.58278e-87	FAM171B	UP	NA
327	5.72081e-92	0.912379	0.566	0.362	1.91864e-87	OSBPL11	UP	NA
328	3.00002e-91	0.870491	0.691	0.548	1.00615e-86	RFX3-AS1	UP	NA
329	4.11e-91	0.594263	0.908	0.942	1.37841e-86	NFAT5	UP	TF
330	7.87144e-91	0.925795	0.458	0.217	2.63993e-86	UNC79	UP	NA
331	7.94706e-91	0.802163	0.732	0.554	2.66529e-86	OLFM2	UP	NA
332	1.52067e-90	0.868331	0.694	0.549	5.10003e-86	CDC14A	UP	NA
333	8.05809e-90	0.579061	0.162	0.001	2.70252e-85	AC090993.1	UP	NA
334	9.64918e-90	0.809416	0.71	0.62	3.23614e-85	KIAA1671	UP	NA
335	1.41963e-89	0.8693	0.286	0.065	4.76116e-85	AC124854.1	UP	NA
336	3.29722e-88	0.724578	0.433	0.189	1.10582e-83	MMP28	UP	NA
337	6.07802e-88	0.746409	0.357	0.126	2.03845e-83	MT1X	UP	NA
338	1.17489e-87	0.678813	0.344	0.112	3.94034e-83	DOCK9	UP	NA
339	2.28086e-87	0.569981	0.256	0.048	7.64956e-83	LINC00278	UP	NA
340	2.88604e-87	0.682942	0.813	0.775	9.67919e-83	ARHGEF26	UP	NA
341	4.12523e-87	0.845135	0.618	0.451	1.38352e-82	SLC15A2	UP	NA
342	7.36002e-87	0.701822	0.818	0.809	2.4684e-82	TRAK1	UP	NA
343	1.67016e-86	0.841854	0.52	0.301	5.60138e-82	GABRG1	UP	NA
344	2.3795e-84	0.48117	0.164	0.005	7.98037e-80	MT1G	UP	NA
345	2.75307e-84	0.46979	0.207	0.025	9.23325e-80	S100A13	UP	NA
346	5.49789e-84	0.5863	0.276	0.067	1.84388e-79	IZUMO4	UP	NA
347	1.04007e-83	1.18402	0.465	0.235	3.48818e-79	ST6GALNAC3	UP	NA
348	1.3489e-83	0.450439	0.185	0.015	4.52395e-79	CPNE6	UP	NA
349	1.45149e-83	0.834502	0.577	0.38	4.86801e-79	LAMA1	UP	NA
350	3.79251e-83	0.468925	0.205	0.024	1.27193e-78	IDI2-AS1	UP	NA
351	3.84624e-83	0.769005	0.713	0.651	1.28995e-78	RSRP1	UP	NA
352	4.88096e-83	0.643851	0.696	0.517	1.63698e-78	SERPINE2	UP	NA
353	5.93482e-83	0.754807	0.286	0.072	1.99042e-78	AC115622.1	UP	NA
354	1.66976e-82	0.900649	0.337	0.12	5.60003e-78	RNF220	UP	NA
355	3.31245e-82	0.785589	0.521	0.33	1.11093e-77	B4GALNT4	UP	NA
356	5.96512e-82	0.756863	0.636	0.472	2.00058e-77	NIN	UP	NA
357	1.15432e-81	0.583028	0.326	0.108	3.87135e-77	RGS11	UP	NA
358	2.45824e-81	0.576942	0.886	0.879	8.24445e-77	TCF7L2	UP	TF
359	2.77175e-81	0.849311	0.63	0.5	9.29589e-77	RNPC3	UP	NA
360	9.76139e-81	0.653223	0.819	0.822	3.27378e-76	ARHGAP32	UP	NA
361	1.06268e-80	0.779666	0.587	0.423	3.56401e-76	APC2	UP	NA
362	2.96081e-80	0.575321	0.238	0.047	9.92996e-76	RAP1GAP2	UP	NA
363	1.30121e-79	0.578187	0.948	0.978	4.364e-75	CPE	UP	NA
364	4.39238e-79	0.619923	0.293	0.086	1.47312e-74	SMTN	UP	NA
365	2.0844e-78	0.535314	0.269	0.068	6.99067e-74	MRO	UP	NA
366	4.58528e-78	0.625147	0.8	0.802	1.53781e-73	REPS1	UP	NA
367	1.96015e-77	0.718406	0.412	0.194	6.57394e-73	COL16A1	UP	NA
368	2.41672e-77	0.449579	0.2	0.027	8.10521e-73	PTH1R	UP	NA
369	3.34989e-77	0.679391	0.387	0.166	1.12349e-72	EPB41L1	UP	NA
370	1.2702e-76	0.810118	0.557	0.392	4.26001e-72	CYB5B	UP	NA
371	5.46183e-76	0.468383	0.232	0.046	1.83179e-71	CDH26	UP	NA
372	8.88491e-76	0.444699	0.166	0.012	2.97982e-71	AC007923.4	UP	NA
373	1.46449e-75	0.547299	0.16	0.009	4.91159e-71	AF123462.1	UP	NA
374	2.13727e-75	0.529461	0.274	0.075	7.16798e-71	AC013643.2	UP	NA
375	2.54478e-75	0.65737	0.708	0.526	8.53468e-71	GALNT18	UP	NA
376	3.70365e-75	0.625788	0.826	0.782	1.24213e-70	GRID1	UP	NA
377	6.20505e-75	0.74262	0.7	0.581	2.08105e-70	FGFR2	UP	NA
378	1.41271e-74	0.453375	0.976	0.935	4.73794e-70	GABRB1	UP	NA
379	1.55671e-74	0.659526	0.774	0.598	5.22089e-70	LINC01748	UP	NA
380	3.57309e-74	0.599939	0.833	0.768	1.19834e-69	FOXO1	UP	TF
381	1.66994e-73	0.67328	0.441	0.238	5.60063e-69	HIP1R	UP	NA
382	3.49857e-73	0.330508	0.134	0.001	1.17335e-68	S100A1	UP	NA
383	1.5257e-72	0.918687	0.327	0.117	5.1169e-68	AC006148.1	UP	NA
384	3.76664e-72	0.745032	0.585	0.41	1.26326e-67	TGFBR3	UP	NA
385	3.98229e-72	0.595776	0.214	0.04	1.33558e-67	MBP	UP	NA
386	1.22409e-71	0.605998	0.25	0.064	4.10534e-67	MT1M	UP	NA
387	1.26937e-71	0.769602	0.742	0.692	4.25721e-67	GRIA2	UP	NA
388	1.98189e-71	0.454749	0.183	0.023	6.64685e-67	TEX15	UP	NA
389	4.20769e-71	0.47716	0.987	0.966	1.41118e-66	NKAIN3	UP	NA
390	4.67499e-71	0.872932	0.431	0.219	1.5679e-66	SPOCK1	UP	NA
391	8.58614e-71	0.604256	0.816	0.783	2.87962e-66	SCD5	UP	NA
392	2.55054e-70	0.600312	0.337	0.136	8.55402e-66	IL17RB	UP	NA
393	3.86014e-70	0.466427	0.213	0.041	1.29461e-65	ZIC2	UP	TF
394	4.81793e-70	0.693776	0.406	0.212	1.61584e-65	NSMF	UP	NA
395	4.96094e-70	0.700901	0.434	0.224	1.6638e-65	FAM49A	UP	NA
396	1.83616e-69	0.819666	0.483	0.275	6.15812e-65	AC138627.1	UP	NA
397	2.25073e-69	0.745993	0.498	0.319	7.54851e-65	PLEC	UP	NA
398	2.41312e-69	0.78655	0.61	0.493	8.09313e-65	MEGF9	UP	NA
399	4.60608e-69	1.52022	0.131	0.003	1.54479e-64	XIST	UP	NA
400	4.8066e-69	0.70278	0.505	0.328	1.61204e-64	DCUN1D1	UP	NA
401	5.41351e-69	0.746665	0.406	0.213	1.81558e-64	S100B	UP	NA
402	6.97728e-69	0.454226	0.212	0.043	2.34004e-64	GJB6	UP	NA
403	1.36326e-68	0.802065	0.546	0.382	4.57211e-64	CNTNAP3	UP	NA
404	1.62695e-68	0.708254	0.77	0.77	5.45645e-64	CLEC16A	UP	NA
405	3.77834e-68	0.449729	0.934	0.944	1.26718e-63	KCNMA1	UP	NA
406	5.73748e-68	0.699057	0.751	0.654	1.92424e-63	INPP4B	UP	NA
407	1.04237e-67	0.560422	0.273	0.087	3.49589e-63	KCNA2	UP	NA
408	1.25404e-67	0.422226	0.168	0.02	4.20579e-63	PLP1	UP	NA
409	2.33578e-67	0.641826	0.815	0.764	7.83374e-63	STARD13	UP	NA
410	2.48739e-67	0.47236	0.184	0.028	8.3422e-63	CPM	UP	NA
411	2.88996e-67	0.702567	0.727	0.711	9.69234e-63	ZMAT1	UP	NA
412	3.83078e-67	0.408849	0.206	0.04	1.28477e-62	RHOU	UP	NA
413	4.14239e-67	0.615053	0.806	0.775	1.38927e-62	SFMBT2	UP	NA
414	6.15111e-67	0.398035	0.192	0.033	2.06296e-62	AL513217.1	UP	NA
415	8.76552e-67	0.565009	0.877	0.849	2.93978e-62	GLI3	UP	TF
416	1.50066e-66	0.466976	0.226	0.052	5.03291e-62	RGCC	UP	NA
417	5.03075e-66	0.596598	0.91	0.85	1.68721e-61	AC073050.1	UP	NA
418	8.20964e-66	0.700113	0.553	0.386	2.75335e-61	TNS3	UP	NA
419	1.14e-65	0.598911	0.301	0.107	3.82335e-61	SYTL4	UP	NA
420	1.76617e-65	0.326611	0.159	0.017	5.92338e-61	LCN12	UP	NA
421	2.08452e-65	0.458851	0.183	0.029	6.99107e-61	HLF	UP	TF
422	2.55174e-65	0.716648	0.541	0.366	8.55803e-61	CAPS2	UP	NA
423	3.8338e-65	0.815696	0.83	0.764	1.28578e-60	SGCD	UP	NA
424	4.18293e-65	0.776955	0.275	0.094	1.40287e-60	DHFR	UP	NA
425	5.84062e-65	0.688896	0.728	0.713	1.95883e-60	GPRC5B	UP	NA
426	5.96625e-65	0.40687	0.957	0.982	2.00096e-60	GNAQ	UP	NA
427	1.05067e-64	0.3896	0.161	0.019	3.52373e-60	AL121827.2	UP	NA
428	2.00836e-64	0.355192	0.141	0.01	6.73563e-60	LMOD1	UP	NA
429	2.23058e-64	0.664076	0.242	0.065	7.48091e-60	MIR2052HG	UP	NA
430	4.2745e-64	0.868752	0.44	0.224	1.43358e-59	MIR4300HG	UP	NA
431	4.6823e-64	0.343776	0.989	1	1.57035e-59	DST	UP	NA
432	6.91376e-64	0.651998	0.383	0.194	2.31874e-59	PFKL	UP	NA
433	1.68483e-63	0.701233	0.7	0.689	5.65057e-59	CEP350	UP	NA
434	2.23866e-63	0.746861	0.57	0.404	7.50802e-59	LINC00894	UP	NA
435	2.25209e-63	0.748337	0.659	0.57	7.55307e-59	ALDH7A1	UP	NA
436	5.9502e-63	0.644224	0.346	0.145	1.99558e-58	LYPD6	UP	NA
437	1.78019e-62	0.592278	0.769	0.779	5.9704e-58	MTSS1L	UP	NA
438	7.79506e-62	0.511162	0.851	0.893	2.61431e-57	SPTBN1	UP	NA
439	9.61587e-62	0.496982	0.294	0.109	3.22497e-57	AMY2B	UP	NA
440	1.44442e-61	0.753667	0.543	0.406	4.84428e-57	ZNF248	UP	TF
441	1.62958e-61	0.436718	0.197	0.041	5.4653e-57	CTSH	UP	NA
442	2.1187e-61	0.540255	0.864	0.889	7.10569e-57	CHPT1	UP	NA
443	2.85331e-61	0.715043	0.687	0.608	9.56944e-57	SYT17	UP	NA
444	2.99007e-61	0.413071	0.189	0.036	1.00281e-56	AP001528.2	UP	NA
445	3.17505e-61	0.32111	0.126	0.006	1.06485e-56	ENTPD2	UP	NA
446	3.81172e-61	0.527623	0.808	0.767	1.27837e-56	ACACB	UP	NA
447	4.55113e-61	0.438362	0.914	0.957	1.52636e-56	TNRC6B	UP	NA
448	1.14189e-60	0.687646	0.537	0.394	3.82966e-56	BCR	UP	NA
449	1.21229e-60	0.636066	0.323	0.141	4.06577e-56	MT1E	UP	NA
450	1.59592e-60	0.649105	0.669	0.526	5.3524e-56	PIP4K2A	UP	NA
451	1.82404e-60	0.58334	0.804	0.851	6.11748e-56	PON2	UP	NA
452	2.24825e-60	0.607813	0.781	0.81	7.54019e-56	AFF1	UP	NA
453	2.93342e-60	0.640611	0.731	0.555	9.83809e-56	SPON1	UP	NA
454	3.31194e-60	0.546591	0.771	0.688	1.11076e-55	SORCS2	UP	NA
455	5.55862e-60	0.427177	0.19	0.039	1.86425e-55	FBLN1	UP	NA
456	5.70967e-60	0.599259	0.436	0.25	1.91491e-55	PDGFRB	UP	NA
457	5.81659e-60	0.48902	0.233	0.067	1.95077e-55	TRIL	UP	NA
458	6.7077e-60	0.880879	0.265	0.094	2.24963e-55	FRMPD4	UP	NA
459	8.23259e-60	0.668451	0.497	0.33	2.76105e-55	RAMP1	UP	NA
460	8.73252e-60	0.283782	0.115	0.003	2.92871e-55	PRELP	UP	NA
461	1.18492e-59	0.706135	0.502	0.33	3.974e-55	EMID1	UP	NA
462	1.329e-59	0.47009	0.182	0.035	4.45719e-55	CAMK2A	UP	NA
463	1.44972e-59	0.758428	0.466	0.274	4.86207e-55	UPP2	UP	NA
464	1.75982e-59	0.719144	0.523	0.327	5.9021e-55	STXBP6	UP	NA
465	1.94644e-59	0.758512	0.438	0.238	6.52797e-55	PRRX1	UP	TF
466	2.3408e-59	0.668751	0.567	0.446	7.85056e-55	CLIP4	UP	NA
467	3.27299e-59	0.471871	0.232	0.067	1.09769e-54	NFATC4	UP	TF
468	1.66037e-58	0.828207	0.82	0.826	5.56855e-54	FAM189A2	UP	NA
469	2.13321e-58	0.53507	0.276	0.101	7.15437e-54	ARFGEF3	UP	NA
470	5.05991e-58	0.641643	0.857	0.921	1.69699e-53	AQP4	UP	NA
471	5.16173e-58	0.619455	0.416	0.243	1.73114e-53	TSPOAP1	UP	NA
472	1.2489e-57	0.741529	0.286	0.113	4.18857e-53	HILPDA	UP	NA
473	2.78423e-57	0.612078	0.333	0.159	9.33774e-53	WFS1	UP	NA
474	1.88668e-56	0.327052	0.183	0.038	6.32756e-52	AC007325.2	UP	NA
475	3.21501e-56	0.611541	0.681	0.632	1.07825e-51	CTIF	UP	NA
476	3.25328e-56	0.327787	0.147	0.019	1.09109e-51	FAM153A	UP	NA
477	7.1371e-56	0.531868	0.802	0.819	2.39364e-51	TOM1L2	UP	NA
478	7.25506e-56	0.45354	0.248	0.083	2.4332e-51	RIDA	UP	NA
479	7.45237e-56	0.36788	0.17	0.031	2.49938e-51	ABLIM3	UP	NA
480	9.17031e-56	0.495808	0.203	0.05	3.07554e-51	AC022294.1	UP	NA
481	1.66998e-55	0.567298	0.263	0.093	5.60079e-51	ATP13A5	UP	NA
482	2.40081e-55	0.634022	0.393	0.206	8.05182e-51	NT5DC1	UP	NA
483	2.517e-55	0.642498	0.6	0.447	8.44152e-51	OAF	UP	NA
484	3.62483e-55	0.478774	0.254	0.088	1.2157e-50	TYRO3	UP	NA
485	5.26419e-55	0.575599	0.267	0.1	1.7655e-50	NME9	UP	NA
486	1.12371e-54	0.447375	0.194	0.045	3.76869e-50	FIRRE	UP	NA
487	1.21481e-54	0.509141	0.91	0.942	4.07424e-50	TMEM161B-AS1	UP	NA
488	1.30261e-54	0.450381	0.189	0.044	4.3687e-50	AC010615.4	UP	NA
489	2.4004e-54	1.07565	0.215	0.06	8.05045e-50	LINC01088	UP	NA
490	3.00465e-54	0.56305	0.39	0.206	1.0077e-49	SSBP3	UP	TF
491	4.82154e-54	0.610736	0.79	0.765	1.61705e-49	C1orf21	UP	NA
492	5.2305e-54	0.667347	0.467	0.289	1.75421e-49	FAM69A	UP	NA
493	7.14223e-54	0.61292	0.731	0.664	2.39536e-49	FGF2	UP	NA
494	9.65579e-54	0.581635	0.658	0.537	3.23836e-49	ZBTB16	UP	TF
495	1.41733e-53	0.68406	0.638	0.571	4.75345e-49	ACSL3	UP	NA
496	1.43821e-53	0.569073	0.283	0.115	4.82349e-49	AC036214.1	UP	NA
497	3.95947e-53	0.710687	0.454	0.292	1.32793e-48	GRK3	UP	NA
498	5.19297e-53	0.662744	0.605	0.506	1.74162e-48	GPT2	UP	NA
499	1.04352e-52	0.448858	0.207	0.056	3.49976e-48	PCBP3	UP	NA
500	1.39945e-52	0.636364	0.7	0.631	4.69347e-48	TMEM232	UP	NA
501	2.07801e-52	0.694582	0.323	0.15	6.96923e-48	RHBDL3	UP	NA
502	2.1371e-52	0.495218	0.28	0.114	7.1674e-48	TNS2	UP	NA
503	2.30208e-52	0.659402	0.477	0.323	7.72072e-48	KREMEN1	UP	NA
504	2.47338e-52	0.337403	0.975	0.997	8.29522e-48	PRKCA	UP	NA
505	2.72201e-52	0.537116	0.848	0.851	9.12906e-48	FBXL17	UP	NA
506	3.21715e-52	0.590573	0.701	0.648	1.07897e-47	DAPK1	UP	NA
507	3.65443e-52	0.54159	0.776	0.764	1.22562e-47	PDLIM5	UP	TF
508	3.71922e-52	0.396677	0.931	0.937	1.24735e-47	AKT3	UP	NA
509	4.73125e-52	0.331207	0.163	0.031	1.58677e-47	NFATC1	UP	TF
510	8.79433e-52	0.669754	0.615	0.499	2.94944e-47	COBL	UP	NA
511	8.79792e-52	0.386101	0.937	0.976	2.95065e-47	NCOA1	UP	NA
512	1.61175e-51	0.626128	0.787	0.701	5.40549e-47	MMD2	UP	NA
513	1.67312e-51	0.629435	0.406	0.241	5.61132e-47	LINC00982	UP	NA
514	2.33912e-51	0.320677	0.149	0.025	7.84496e-47	NT5E	UP	NA
515	3.0582e-51	0.596363	0.339	0.168	1.02566e-46	EFHD1	UP	NA
516	3.68871e-51	0.605306	0.407	0.239	1.23712e-46	HEPH	UP	NA
517	5.88901e-51	0.481029	0.855	0.917	1.97506e-46	ARHGEF12	UP	NA
518	6.11216e-51	0.637683	0.399	0.233	2.0499e-46	CRYBG3	UP	NA
519	1.37149e-50	0.635101	0.685	0.618	4.5997e-46	KIAA1958	UP	NA
520	1.44979e-50	0.660348	0.402	0.228	4.86232e-46	BRINP2	UP	NA
521	1.667e-50	0.661324	0.406	0.251	5.59078e-46	KCNJ10	UP	NA
522	2.40084e-50	0.265794	0.128	0.015	8.05195e-46	AC007193.2	UP	NA
523	2.68605e-50	0.388591	0.242	0.086	9.00849e-46	PIGZ	UP	NA
524	2.72498e-50	0.611554	0.386	0.221	9.13905e-46	EPHX1	UP	NA
525	3.39157e-50	0.270823	0.117	0.01	1.13746e-45	RNF144B	UP	NA
526	4.59744e-50	0.494137	0.264	0.107	1.54189e-45	CHST1	UP	NA
527	7.6239e-50	0.671626	0.3	0.137	2.5569e-45	SGK1	UP	NA
528	1.19943e-49	0.33179	0.128	0.016	4.02264e-45	AL365259.1	UP	NA
529	1.21296e-49	0.330679	0.155	0.03	4.06803e-45	MIR193BHG	UP	NA
530	1.52093e-49	0.618591	0.687	0.632	5.10089e-45	RFTN2	UP	NA
531	3.06421e-49	0.599519	0.732	0.741	1.02767e-44	ECHDC2	UP	NA
532	4.96578e-49	0.526557	0.301	0.139	1.66542e-44	KLF9	UP	TF
533	7.59196e-49	0.402084	0.234	0.081	2.54619e-44	CR381653.1	UP	NA
534	1.781e-48	0.373981	0.915	0.93	5.97311e-44	ZHX3	UP	TF
535	1.89353e-48	0.588499	0.403	0.238	6.35051e-44	CDC42EP4	UP	NA
536	2.24803e-48	0.618136	0.423	0.262	7.53944e-44	FUT10	UP	NA
537	2.48437e-48	0.619631	0.562	0.457	8.33207e-44	PALM	UP	NA
538	2.6914e-48	0.597276	0.65	0.536	9.02643e-44	CAMK1D	UP	NA
539	3.43143e-48	0.680212	0.652	0.559	1.15083e-43	ADCY8	UP	NA
540	4.46048e-48	0.296097	0.995	1	1.49596e-43	MACF1	UP	NA
541	4.69002e-48	0.528674	0.32	0.158	1.57294e-43	CRB2	UP	NA
542	5.31438e-48	0.379943	0.135	0.02	1.78234e-43	PEBP4	UP	NA
543	1.24264e-47	0.660121	0.501	0.357	4.16757e-43	HCG17	UP	NA
544	1.47104e-47	0.884628	0.356	0.183	4.93358e-43	AC010099.4	UP	NA
545	1.66166e-47	0.283917	0.115	0.011	5.57286e-43	MT1F	UP	NA
546	2.16823e-47	0.69351	0.598	0.488	7.27183e-43	KATNAL2	UP	NA
547	2.25836e-47	0.543087	0.343	0.188	7.57409e-43	STARD3	UP	NA
548	2.90655e-47	0.491461	0.272	0.116	9.748e-43	C2CD2	UP	NA
549	3.64124e-47	0.693411	0.456	0.298	1.2212e-42	MTERF1	UP	TF
550	4.7244e-47	0.54963	0.717	0.702	1.58447e-42	SLC6A1	UP	NA
551	6.48911e-47	0.62557	0.356	0.194	2.17632e-42	KBTBD12	UP	NA
552	7.30794e-47	0.484914	0.809	0.824	2.45094e-42	ADGRA3	UP	NA
553	7.4455e-47	0.637113	0.408	0.244	2.49707e-42	DMGDH	UP	NA
554	9.69472e-47	0.69982	0.71	0.62	3.25142e-42	GRM3	UP	NA
555	1.60933e-46	0.311833	0.111	0.01	5.39738e-42	CALCB	UP	NA
556	2.01981e-46	0.463159	0.211	0.066	6.77402e-42	CASC17	UP	NA
557	2.32818e-46	0.438193	0.227	0.082	7.80825e-42	SEMA4A	UP	TF
558	3.60515e-46	0.426365	0.208	0.069	1.20909e-41	PCTP	UP	NA
559	3.98282e-46	0.424688	0.224	0.079	1.33576e-41	TEF	UP	TF
560	4.00504e-46	0.610453	0.647	0.603	1.34321e-41	OTUD7B	UP	NA
561	4.31493e-46	0.499595	0.319	0.163	1.44714e-41	SUN2	UP	NA
562	4.99486e-46	0.411463	0.217	0.074	1.67518e-41	PLEKHB1	UP	NA
563	5.99542e-46	0.321434	0.135	0.023	2.01074e-41	DSCAS	UP	NA
564	7.87724e-46	0.664914	0.501	0.388	2.64187e-41	ENO1	UP	TF
565	1.30116e-45	0.548659	0.803	0.882	4.36382e-41	MUC20-OT1	UP	NA
566	1.50449e-45	0.574699	0.339	0.185	5.04577e-41	GSE1	UP	NA
567	1.59239e-45	0.403959	0.152	0.032	5.34055e-41	FAP	UP	NA
568	3.60922e-45	0.2855	0.134	0.023	1.21046e-40	CDK18	UP	NA
569	5.92023e-45	0.795084	0.59	0.515	1.98553e-40	MT2A	UP	NA
570	6.42998e-45	0.556839	0.69	0.663	2.15649e-40	SORL1	UP	NA
571	9.73995e-45	0.717619	0.597	0.497	3.26658e-40	DAAM2	UP	NA
572	1.36395e-44	0.407928	0.229	0.086	4.5744e-40	SMARCD2	UP	NA
573	1.67436e-44	0.517033	0.81	0.788	5.61547e-40	BCAS3	UP	NA
574	4.44261e-44	0.716893	0.475	0.313	1.48996e-39	STPG2	UP	NA
575	5.37621e-44	0.686273	0.609	0.51	1.80307e-39	CDH10	UP	NA
576	6.60392e-44	0.391906	0.223	0.079	2.21482e-39	HSPB8	UP	NA
577	8.16481e-44	0.502521	0.311	0.16	2.73831e-39	TRIM8	UP	NA
578	1.01246e-43	0.6116	0.429	0.307	3.39558e-39	SEPT8	UP	NA
579	1.02763e-43	0.260656	0.116	0.015	3.44648e-39	SNCG	UP	NA
580	1.9784e-43	0.594575	0.336	0.189	6.63517e-39	AL365273.2	UP	NA
581	2.22051e-43	0.524269	0.35	0.197	7.44715e-39	TTPA	UP	NA
582	2.87055e-43	0.549444	0.498	0.34	9.62727e-39	CADPS2	UP	NA
583	3.14863e-43	0.407649	0.209	0.072	1.05599e-38	A2ML1	UP	NA
584	4.71839e-43	0.59852	0.458	0.333	1.58245e-38	MINK1	UP	NA
585	6.43602e-43	0.540001	0.321	0.169	2.15851e-38	EMX2	UP	TF
586	1.30914e-42	0.440955	0.844	0.871	4.39059e-38	CPEB4	UP	NA
587	2.57941e-42	0.320671	0.181	0.053	8.65082e-38	ZBED5-AS1	UP	NA
588	2.71549e-42	0.397945	0.151	0.035	9.1072e-38	C2CD6	UP	NA
589	3.92317e-42	0.574996	0.392	0.246	1.31575e-37	RHOB	UP	NA
590	4.58732e-42	0.499528	0.257	0.111	1.5385e-37	PSMA1	UP	NA
591	4.64419e-42	0.506744	0.206	0.072	1.55757e-37	AF165147.1	UP	NA
592	8.29361e-42	0.557843	0.685	0.623	2.78151e-37	PER3	UP	NA
593	1.29288e-41	1.06919	0.66	0.666	4.33606e-37	MT3	UP	NA
594	1.56683e-41	0.393406	0.206	0.072	5.25482e-37	ADIRF	UP	NA
595	1.57174e-41	0.646402	0.499	0.397	5.2713e-37	AGT	UP	NA
596	2.24321e-41	0.56691	0.385	0.251	7.52329e-37	PABPN1	UP	NA
597	2.46986e-41	0.650455	0.613	0.6	8.28342e-37	NUTM2B-AS1	UP	NA
598	2.67432e-41	0.579554	0.355	0.211	8.96913e-37	ABCD2	UP	NA
599	3.30245e-41	0.330932	0.143	0.031	1.10758e-36	SYCP2L	UP	NA
600	4.38823e-41	0.646489	0.412	0.279	1.47173e-36	TMEM144	UP	NA
601	4.82055e-41	0.43683	0.209	0.076	1.61671e-36	LPIN3	UP	NA
602	5.29009e-41	0.315603	0.16	0.042	1.77419e-36	SLC2A1	UP	NA
603	1.14315e-40	1.05502	0.253	0.112	3.83391e-36	AC073941.1	UP	NA
604	1.69182e-40	0.427632	0.232	0.095	5.67401e-36	PRR5	UP	NA
605	2.03725e-40	0.576007	0.42	0.291	6.83252e-36	NUDT3	UP	NA
606	2.26767e-40	0.641943	0.493	0.398	7.60532e-36	PMP22	UP	NA
607	3.00089e-40	0.331627	0.111	0.016	1.00644e-35	ZNF208	UP	TF
608	3.1311e-40	0.540685	0.731	0.725	1.05011e-35	PLSCR4	UP	NA
609	3.60788e-40	0.36828	0.949	0.945	1.21001e-35	NHSL1	UP	NA
610	4.0428e-40	0.625875	0.412	0.282	1.35587e-35	ASRGL1	UP	NA
611	8.98488e-40	0.380006	0.185	0.061	3.01335e-35	TRMT9B	UP	NA
612	1.2946e-39	0.321922	0.172	0.052	4.34183e-35	SELENBP1	UP	NA
613	2.89106e-39	0.575894	0.49	0.402	9.69605e-35	NRBP2	UP	NA
614	3.2731e-39	0.265945	0.112	0.017	1.09773e-34	SDS	UP	NA
615	3.86425e-39	0.503838	0.329	0.189	1.29599e-34	HHIPL1	UP	NA
616	4.9488e-39	0.576502	0.778	0.814	1.65973e-34	ABR	UP	NA
617	6.1007e-39	0.712939	0.459	0.318	2.04605e-34	NR6A1	UP	TF
618	1.30468e-38	0.603245	0.369	0.235	4.37565e-34	SCG3	UP	NA
619	1.35013e-38	0.607889	0.564	0.474	4.52807e-34	C3orf70	UP	NA
620	2.6403e-38	0.552203	0.59	0.503	8.85503e-34	AC053527.1	UP	NA
621	2.8614e-38	0.556172	0.443	0.33	9.59655e-34	RALGDS	UP	NA
622	3.67213e-38	0.892833	0.343	0.2	1.23156e-33	AC098829.1	UP	NA
623	3.99782e-38	0.646739	0.444	0.338	1.34079e-33	PRNP	UP	TF
624	5.17979e-38	0.395468	0.207	0.077	1.7372e-33	ARHGAP29	UP	NA
625	6.5157e-38	0.278793	0.124	0.025	2.18523e-33	ZNF703	UP	NA
626	7.47192e-38	0.461095	0.291	0.15	2.50593e-33	BHLHE40	UP	TF
627	1.12437e-37	0.550945	0.434	0.31	3.77092e-33	CAB39L	UP	NA
628	1.52546e-37	0.469944	0.303	0.165	5.11608e-33	KIFC2	UP	NA
629	3.59255e-37	0.515236	0.642	0.599	1.20487e-32	PREX1	UP	NA
630	5.04e-37	0.541984	0.373	0.226	1.69031e-32	SYT9	UP	NA
631	6.55429e-37	0.559201	0.528	0.418	2.19818e-32	PPP2R2C	UP	NA
632	7.40692e-37	0.582655	0.465	0.328	2.48413e-32	RUNX1T1	UP	NA
633	7.50125e-37	0.673985	0.53	0.407	2.51577e-32	AL022068.1	UP	NA
634	8.08253e-37	0.454882	0.303	0.165	2.71072e-32	ADAMTS10	UP	NA
635	1.00897e-36	0.607177	0.455	0.345	3.38388e-32	METRN	UP	NA
636	1.16891e-36	0.584612	0.598	0.54	3.92028e-32	ARMH4	UP	NA
637	1.54043e-36	0.585032	0.454	0.344	5.16631e-32	PURG	UP	TF
638	2.08725e-36	0.428538	0.845	0.898	7.00021e-32	PRDM16	UP	TF
639	2.15918e-36	0.493176	0.73	0.731	7.24146e-32	FAM184A	UP	NA
640	2.21345e-36	0.564261	0.557	0.496	7.42347e-32	CD47	UP	NA
641	2.73648e-36	0.597034	0.431	0.332	9.17759e-32	LENG8	UP	NA
642	3.6827e-36	0.459054	0.821	0.797	1.23511e-31	DDAH1	UP	NA
643	5.18576e-36	0.536968	0.492	0.382	1.7392e-31	CPEB2	UP	NA
644	6.36544e-36	0.78119	0.681	0.727	2.13484e-31	FP236383.1	UP	NA
645	9.48396e-36	0.526066	0.274	0.141	3.18073e-31	TIAM1	UP	NA
646	1.26969e-35	0.294342	0.143	0.039	4.25828e-31	TF	UP	NA
647	1.34421e-35	0.483233	0.727	0.775	4.50821e-31	NT5C2	UP	NA
648	1.93988e-35	0.473471	0.282	0.153	6.50596e-31	AGFG2	UP	NA
649	2.07563e-35	0.456659	0.746	0.726	6.96126e-31	MEGF10	UP	NA
650	2.23115e-35	0.386776	0.182	0.064	7.48284e-31	RPL34-AS1	UP	NA
651	2.25039e-35	0.469217	0.279	0.145	7.54737e-31	MYH14	UP	NA
652	2.59683e-35	0.495457	0.292	0.164	8.70925e-31	CASKIN1	UP	NA
653	2.67525e-35	0.556984	0.551	0.481	8.97225e-31	RAVER2	UP	NA
654	3.08687e-35	0.48936	0.154	0.047	1.03527e-30	AC022639.1	UP	NA
655	3.83555e-35	0.629417	0.636	0.622	1.28637e-30	GAN	UP	NA
656	5.29253e-35	0.523561	0.397	0.275	1.77501e-30	ADCYAP1R1	UP	NA
657	5.57778e-35	0.599801	0.447	0.334	1.87068e-30	WBP2NL	UP	NA
658	7.99041e-35	0.267412	0.13	0.031	2.67982e-30	AC016907.2	UP	NA
659	8.59512e-35	0.516544	0.378	0.251	2.88263e-30	BAG3	UP	NA
660	9.15295e-35	0.362699	0.11	0.02	3.06972e-30	AP003181.1	UP	NA
661	1.51824e-34	0.607484	0.629	0.574	5.09187e-30	BOC	UP	NA
662	1.57338e-34	0.289655	0.121	0.027	5.27681e-30	CHST6	UP	NA
663	1.59425e-34	0.45405	0.729	0.77	5.3468e-30	EPS15	UP	NA
664	2.09254e-34	0.45996	0.306	0.174	7.01796e-30	STOM	UP	NA
665	3.35784e-34	0.475416	0.253	0.129	1.12615e-29	GRINA	UP	NA
666	3.38023e-34	0.555973	0.645	0.591	1.13366e-29	PLPP1	UP	NA
667	4.73941e-34	0.773552	0.732	0.736	1.5895e-29	AQP4-AS1	UP	NA
668	5.19703e-34	0.329139	0.154	0.047	1.74298e-29	JAKMIP1	UP	NA
669	6.00018e-34	0.565177	0.398	0.287	2.01234e-29	LRRC8A	UP	NA
670	1.36967e-33	0.800246	0.475	0.405	4.5936e-29	VEGFA	UP	NA
671	1.66532e-33	0.785507	0.487	0.39	5.58515e-29	NRP1	UP	NA
672	2.06198e-33	0.519331	0.391	0.266	6.91548e-29	SLC22A15	UP	NA
673	3.44604e-33	0.550697	0.291	0.164	1.15573e-28	FAM162A	UP	NA
674	3.92316e-33	0.66189	0.214	0.091	1.31575e-28	AGBL1	UP	NA
675	3.97016e-33	0.461473	0.301	0.167	1.33151e-28	TMEM72-AS1	UP	NA
676	4.18692e-33	0.320525	0.187	0.071	1.40421e-28	LFNG	UP	NA
677	4.52511e-33	0.414176	0.25	0.123	1.51763e-28	AC090115.1	UP	NA
678	5.28249e-33	0.513323	0.356	0.22	1.77164e-28	ENTPD1	UP	NA
679	6.15214e-33	0.437181	0.836	0.898	2.06331e-28	DPYSL2	UP	NA
680	6.77053e-33	0.469634	0.319	0.195	2.2707e-28	MSANTD4	UP	NA
681	6.77434e-33	0.599242	0.562	0.494	2.27198e-28	MGLL	UP	NA
682	7.36618e-33	0.313174	0.91	0.936	2.47047e-28	TJP1	UP	NA
683	1.37696e-32	0.515641	0.491	0.367	4.61804e-28	CLYBL	UP	NA
684	1.62033e-32	0.541598	0.469	0.356	5.43428e-28	ANO5	UP	NA
685	1.76974e-32	0.34727	0.897	0.891	5.93534e-28	NTRK3	UP	NA
686	1.93171e-32	0.526406	0.402	0.251	6.47857e-28	KCTD8	UP	NA
687	1.97813e-32	0.500261	0.631	0.532	6.63424e-28	THSD7A	UP	NA
688	2.05958e-32	0.319272	0.149	0.047	6.90743e-28	NR1D1	UP	TF
689	2.33939e-32	0.294067	0.168	0.06	7.84583e-28	ADI1	UP	NA
690	3.03958e-32	0.409756	0.75	0.714	1.01941e-27	SGK3	UP	NA
691	3.12822e-32	0.522257	0.425	0.318	1.04914e-27	MTMR10	UP	NA
692	3.64129e-32	0.570533	0.475	0.366	1.22122e-27	AZIN1-AS1	UP	NA
693	4.43674e-32	0.340308	0.192	0.078	1.48799e-27	ASB3	UP	NA
694	6.35921e-32	0.411088	0.277	0.152	2.13275e-27	CHDH	UP	NA
695	6.60238e-32	0.354136	0.125	0.033	2.21431e-27	LINC01239	UP	NA
696	6.9664e-32	0.390743	0.21	0.093	2.33639e-27	FBXO2	UP	NA
697	9.30004e-32	0.586279	0.606	0.55	3.11905e-27	PLOD2	UP	NA
698	1.22995e-31	0.482751	0.729	0.746	4.12501e-27	MXI1	UP	TF
699	1.96165e-31	0.577327	0.215	0.097	6.57898e-27	LMNTD1	UP	NA
700	1.97949e-31	0.490889	0.471	0.34	6.63883e-27	KCND3	UP	NA
701	2.09458e-31	0.522669	0.658	0.63	7.02479e-27	ITGB8	UP	NA
702	2.599e-31	0.560454	0.436	0.331	8.71652e-27	PLEKHA6	UP	NA
703	3.28225e-31	0.450782	0.608	0.523	1.1008e-26	PLEKHA7	UP	NA
704	4.26416e-31	0.457928	0.369	0.25	1.43012e-26	SEMA4D	UP	NA
705	4.58856e-31	0.280627	0.142	0.044	1.53891e-26	VASN	UP	NA
706	9.88467e-31	0.392342	0.818	0.786	3.31512e-26	ANKS1B	UP	NA
707	1.14478e-30	0.518145	0.412	0.307	3.83937e-26	PHKA1	UP	NA
708	1.48327e-30	0.32986	0.101	0.02	4.9746e-26	AL133346.1	UP	NA
709	2.18661e-30	0.549397	0.573	0.535	7.33344e-26	SLC27A1	UP	NA
710	2.41649e-30	0.426126	0.249	0.132	8.10442e-26	TSPAN7	UP	NA
711	2.50434e-30	0.440711	0.822	0.854	8.39904e-26	CRB1	UP	NA
712	2.87214e-30	0.545971	0.582	0.468	9.63259e-26	VAV3	UP	NA
713	4.49483e-30	0.478741	0.346	0.224	1.50748e-25	PTCH1	UP	NA
714	5.05126e-30	0.33938	0.172	0.064	1.69409e-25	AP002991.1	UP	NA
715	6.6796e-30	0.573349	0.486	0.419	2.2402e-25	PDXK	UP	NA
716	6.84967e-30	0.282808	0.125	0.035	2.29724e-25	NPFFR1	UP	NA
717	8.44548e-30	0.396493	0.215	0.103	2.83245e-25	FAIM2	UP	NA
718	1.3675e-29	0.33087	0.152	0.053	4.58631e-25	AL024498.2	UP	NA
719	1.45664e-29	0.341049	0.176	0.071	4.88527e-25	SLC7A10	UP	NA
720	1.50378e-29	0.513454	0.383	0.259	5.04337e-25	FREM2	UP	NA
721	1.68249e-29	0.490608	0.332	0.212	5.64273e-25	PDK4	UP	NA
722	1.74765e-29	0.512647	0.607	0.589	5.86127e-25	HIF1A	UP	TF
723	1.93662e-29	0.416029	0.235	0.114	6.49503e-25	RBPMS	UP	NA
724	2.2724e-29	0.36435	0.213	0.099	7.62118e-25	RHOXF1-AS1	UP	NA
725	2.3128e-29	0.54439	0.665	0.66	7.75666e-25	ARHGAP31	UP	NA
726	2.42951e-29	0.266622	0.121	0.033	8.1481e-25	NFATC2	UP	TF
727	3.9737e-29	0.55325	0.548	0.506	1.3327e-24	ZC3H12C	UP	NA
728	4.1571e-29	0.464091	0.386	0.276	1.39421e-24	CYP46A1	UP	NA
729	4.51356e-29	0.429927	0.729	0.747	1.51376e-24	PPFIA1	UP	NA
730	1.31527e-28	0.443627	0.302	0.184	4.41116e-24	FAM13C	UP	NA
731	1.58257e-28	0.420273	0.709	0.667	5.30764e-24	PFKFB3	UP	NA
732	1.8902e-28	0.475453	0.288	0.177	6.33935e-24	RHPN1	UP	NA
733	2.28045e-28	0.310554	0.168	0.066	7.64817e-24	PRKX	UP	NA
734	2.81016e-28	0.432703	0.275	0.162	9.4247e-24	SLC9A3R1	UP	NA
735	3.0022e-28	0.512619	0.593	0.561	1.00688e-23	MTM1	UP	NA
736	3.20175e-28	0.288744	0.146	0.05	1.0738e-23	ADRA1B	UP	NA
737	3.47256e-28	0.250139	0.128	0.04	1.16463e-23	GPT	UP	NA
738	3.79551e-28	0.358445	0.208	0.096	1.27294e-23	COL28A1	UP	NA
739	3.86859e-28	0.361387	0.188	0.081	1.29745e-23	SLC9C2	UP	NA
740	4.07313e-28	0.504045	0.393	0.285	1.36605e-23	USP53	UP	NA
741	5.0565e-28	0.591105	0.326	0.203	1.69585e-23	AC113414.1	UP	NA
742	1.92713e-27	0.531065	0.342	0.226	6.46322e-23	LINC00271	UP	NA
743	2.66224e-27	0.542669	0.492	0.446	8.92863e-23	TSC22D4	UP	TF
744	4.04438e-27	0.511416	0.701	0.774	1.3564e-22	WLS	UP	NA
745	4.44894e-27	0.469754	0.723	0.785	1.49209e-22	DENND4A	UP	NA
746	4.88113e-27	0.517118	0.349	0.241	1.63703e-22	SLC25A33	UP	NA
747	5.45053e-27	0.414767	0.189	0.084	1.828e-22	MGAM	UP	NA
748	5.80166e-27	0.496834	0.573	0.552	1.94576e-22	EFR3A	UP	NA
749	2.03596e-26	0.339864	0.238	0.122	6.82822e-22	GMPR	UP	NA
750	2.06108e-26	0.317996	0.611	0.539	6.91246e-22	TGFB2	UP	NA
751	2.37058e-26	0.60001	0.502	0.452	7.95046e-22	EDNRB	UP	NA
752	4.80186e-26	0.353876	0.801	0.854	1.61045e-21	POU2F1	UP	TF
753	4.9781e-26	0.327574	0.824	0.91	1.66955e-21	MYO6	UP	NA
754	5.65643e-26	0.516759	0.556	0.521	1.89705e-21	PPM1B	UP	NA
755	7.32606e-26	0.370063	0.757	0.736	2.45701e-21	PCSK5	UP	NA
756	7.63411e-26	0.38729	0.789	0.809	2.56033e-21	KALRN	UP	NA
757	8.70724e-26	0.559693	0.444	0.362	2.92023e-21	MEF2C	UP	TF
758	1.01986e-25	0.434231	0.712	0.752	3.4204e-21	ARID1A	UP	NA
759	1.44431e-25	0.290348	0.12	0.037	4.84392e-21	AL590867.1	UP	NA
760	1.58284e-25	0.488745	0.654	0.666	5.30853e-21	RFX2	UP	TF
761	2.73336e-25	0.350756	0.237	0.129	9.16716e-21	PTPN20	UP	NA
762	2.83153e-25	0.296457	0.785	0.749	9.49638e-21	MGST1	UP	NA
763	3.33478e-25	0.452746	0.331	0.21	1.11842e-20	C4orf19	UP	NA
764	3.34867e-25	0.505774	0.422	0.352	1.12308e-20	PHLDB1	UP	NA
765	3.93869e-25	0.30511	0.162	0.069	1.32096e-20	CKMT2	UP	NA
766	4.11128e-25	0.316901	0.879	0.879	1.37884e-20	ITPKB	UP	NA
767	4.44879e-25	0.320173	0.857	0.918	1.49204e-20	FARP1	UP	NA
768	4.57022e-25	0.250693	0.106	0.029	1.53276e-20	CCDC190	UP	NA
769	4.7952e-25	0.416116	0.467	0.341	1.60821e-20	ZBTB7C	UP	TF
770	4.82054e-25	0.296396	0.131	0.046	1.61671e-20	CSDC2	UP	NA
771	5.21129e-25	0.319973	0.178	0.082	1.74776e-20	CTSF	UP	NA
772	6.49834e-25	0.572071	0.483	0.443	2.17941e-20	PKM	UP	TF
773	6.99692e-25	0.443549	0.217	0.111	2.34663e-20	PLCL1	UP	NA
774	7.16803e-25	0.418723	0.303	0.191	2.40401e-20	CD109	UP	NA
775	7.98536e-25	0.345952	0.748	0.694	2.67813e-20	BAALC	UP	NA
776	9.41844e-25	0.520334	0.492	0.442	3.15876e-20	NACC2	UP	NA
777	9.60136e-25	0.557888	0.538	0.48	3.22011e-20	ZFYVE28	UP	NA
778	1.11877e-24	0.602726	0.548	0.534	3.75214e-20	EIF3E	UP	NA
779	1.13892e-24	0.32862	0.157	0.064	3.8197e-20	RIN3	UP	NA
780	1.25945e-24	0.406238	0.261	0.157	4.22394e-20	PER1	UP	NA
781	1.34387e-24	0.260216	0.14	0.053	4.50706e-20	AC104806.2	UP	NA
782	1.51447e-24	0.5472	0.335	0.242	5.07924e-20	IDS	UP	NA
783	1.54944e-24	0.290131	0.162	0.069	5.1965e-20	SLC13A5	UP	NA
784	2.25324e-24	0.486376	0.454	0.376	7.55693e-20	ARMC2	UP	NA
785	2.5285e-24	0.250512	0.946	0.988	8.48008e-20	KIF1B	UP	NA
786	2.5429e-24	0.45169	0.395	0.299	8.52839e-20	KLHDC1	UP	NA
787	3.2364e-24	0.352431	0.247	0.145	1.08542e-19	SLC22A5	UP	NA
788	3.85515e-24	0.458765	0.267	0.166	1.29294e-19	BNIP3	UP	NA
789	4.35698e-24	0.482103	0.615	0.611	1.46124e-19	KANTR	UP	NA
790	4.76588e-24	0.285428	0.166	0.073	1.59838e-19	AL391684.1	UP	NA
791	4.87261e-24	0.495811	0.565	0.507	1.63418e-19	ZSWIM5	UP	NA
792	5.29122e-24	0.365116	0.253	0.152	1.77457e-19	EIF4EBP2	UP	NA
793	5.36577e-24	0.299474	0.142	0.056	1.79957e-19	NCDN	UP	NA
794	5.46562e-24	0.352628	0.21	0.11	1.83306e-19	ERRFI1	UP	NA
795	6.31239e-24	0.519836	0.485	0.418	2.11705e-19	RNF24	UP	NA
796	8.10985e-24	0.354542	0.812	0.875	2.71988e-19	SCAPER	UP	NA
797	8.53143e-24	0.486992	0.455	0.366	2.86127e-19	MSRB3	UP	TF
798	8.93071e-24	0.366292	0.264	0.16	2.99518e-19	HERC3	UP	NA
799	1.69874e-23	0.393116	0.298	0.202	5.69724e-19	CYP4V2	UP	NA
800	1.69947e-23	0.29304	0.159	0.069	5.69968e-19	SNORC	UP	NA
801	1.89324e-23	0.33975	0.799	0.843	6.34955e-19	ACSS3	UP	NA
802	3.09729e-23	0.414524	0.235	0.136	1.03877e-18	AL117339.5	UP	NA
803	3.12197e-23	0.449508	0.327	0.234	1.04705e-18	TMBIM1	UP	NA
804	3.16706e-23	0.256253	0.168	0.074	1.06217e-18	AL139158.2	UP	NA
805	4.15995e-23	0.320798	0.186	0.093	1.39516e-18	FGFRL1	UP	NA
806	4.59641e-23	0.267179	0.135	0.052	1.54155e-18	TMCC2	UP	NA
807	4.98635e-23	0.37128	0.795	0.822	1.67232e-18	ATG7	UP	NA
808	7.09509e-23	0.544816	0.364	0.271	2.37955e-18	CTXND1	UP	NA
809	8.55477e-23	0.272338	0.174	0.081	2.8691e-18	JAKMIP3	UP	NA
810	8.80019e-23	0.491948	0.279	0.174	2.95141e-18	SAMD12	UP	NA
811	9.60472e-23	0.370795	0.224	0.127	3.22123e-18	FAM217B	UP	NA
812	1.05399e-22	0.435796	0.536	0.468	3.53488e-18	SDC2	UP	NA
813	1.35024e-22	0.381308	0.254	0.147	4.52843e-18	MITF	UP	TF
814	1.44744e-22	0.361252	0.248	0.15	4.85443e-18	AC138150.1	UP	NA
815	1.68446e-22	0.470041	0.409	0.331	5.64933e-18	FBXO21	UP	NA
816	1.91438e-22	0.497572	0.365	0.278	6.42046e-18	TERF2IP	UP	NA
817	2.101e-22	0.491776	0.454	0.376	7.04634e-18	AL357153.2	UP	NA
818	2.40506e-22	0.513556	0.365	0.287	8.06611e-18	NDRG4	UP	NA
819	2.56205e-22	0.488608	0.646	0.633	8.59262e-18	AC104596.1	UP	NA
820	2.58723e-22	0.452275	0.541	0.499	8.67705e-18	LRRC1	UP	NA
821	2.70553e-22	0.524836	0.496	0.452	9.0738e-18	CYSTM1	UP	NA
822	4.34495e-22	0.498174	0.357	0.256	1.45721e-17	PEX5L	UP	NA
823	5.77234e-22	0.395386	0.691	0.726	1.93593e-17	MBNL2	UP	TF
824	6.40442e-22	0.507497	0.555	0.529	2.14791e-17	ITM2C	UP	NA
825	6.67299e-22	0.475318	0.579	0.554	2.23799e-17	LINC02062	UP	NA
826	7.13095e-22	0.285818	0.177	0.086	2.39158e-17	CDK9	UP	NA
827	8.04597e-22	0.441184	0.449	0.355	2.69846e-17	SESN1	UP	NA
828	8.30306e-22	0.386808	0.287	0.194	2.78468e-17	ZBED5	UP	NA
829	8.50806e-22	0.401821	0.546	0.478	2.85343e-17	CGNL1	UP	NA
830	1.02407e-21	0.502312	0.545	0.547	3.43454e-17	CAPN2	UP	NA
831	1.27554e-21	0.287499	0.12	0.043	4.27792e-17	PLPP4	UP	NA
832	2.58638e-21	0.526376	0.587	0.594	8.67419e-17	ENSA	UP	NA
833	2.96941e-21	0.420397	0.33	0.237	9.9588e-17	PPP1R13B	UP	NA
834	3.00135e-21	0.325911	0.201	0.107	1.00659e-16	IQSEC2	UP	NA
835	3.57177e-21	0.469416	0.484	0.446	1.1979e-16	ATN1	UP	NA
836	3.77872e-21	0.404219	0.281	0.186	1.26731e-16	THSD1	UP	NA
837	3.99619e-21	0.384101	0.291	0.179	1.34024e-16	FLG-AS1	UP	NA
838	5.19547e-21	0.417893	0.274	0.171	1.74246e-16	PCED1B	UP	NA
839	6.11267e-21	0.487703	0.437	0.375	2.05007e-16	AGL	UP	NA
840	6.14803e-21	0.482679	0.624	0.62	2.06193e-16	PTPN9	UP	NA
841	7.03927e-21	0.426738	0.467	0.38	2.36083e-16	PDGFC	UP	NA
842	8.03185e-21	0.251907	0.959	0.979	2.69372e-16	FUT9	UP	NA
843	9.24375e-21	0.663015	0.168	0.084	3.10017e-16	ZNF804B	UP	NA
844	1.32799e-20	0.477065	0.387	0.307	4.45382e-16	LIMK2	UP	NA
845	1.42977e-20	0.430887	0.544	0.489	4.79517e-16	HIVEP1	UP	TF
846	1.81014e-20	0.407986	0.29	0.196	6.07083e-16	PGM1	UP	NA
847	1.82049e-20	0.26672	0.116	0.043	6.10557e-16	AL162511.1	UP	NA
848	1.9099e-20	0.412788	0.722	0.72	6.40543e-16	ENOX1	UP	NA
849	2.07064e-20	0.26641	0.14	0.061	6.94452e-16	AC090844.2	UP	NA
850	2.78974e-20	0.456726	0.48	0.421	9.35623e-16	AL645568.1	UP	NA
851	2.85263e-20	0.486935	0.636	0.646	9.56715e-16	IQCK	UP	NA
852	3.1569e-20	0.404947	0.671	0.683	1.05876e-15	SOBP	UP	NA
853	3.62073e-20	0.316181	0.232	0.135	1.21432e-15	NDP	UP	NA
854	3.98012e-20	0.369398	0.282	0.189	1.33485e-15	SSPN	UP	NA
855	4.58994e-20	0.392769	0.276	0.186	1.53937e-15	CADM3	UP	NA
856	5.68696e-20	0.27344	0.893	0.929	1.90729e-15	PHLPP1	UP	NA
857	5.86067e-20	0.555899	0.447	0.405	1.96555e-15	GAPDH	UP	NA
858	5.9812e-20	0.347761	0.107	0.039	2.00598e-15	AC138123.1	UP	NA
859	6.4328e-20	0.398859	0.2	0.111	2.15743e-15	AC004158.1	UP	NA
860	7.1038e-20	0.268529	0.103	0.035	2.38247e-15	RBMS1	UP	TF
861	7.45366e-20	0.520015	0.27	0.185	2.49981e-15	KNOP1	UP	NA
862	7.93657e-20	0.463585	0.327	0.234	2.66177e-15	HMGCLL1	UP	NA
863	9.52443e-20	0.44892	0.357	0.274	3.1943e-15	AMOT	UP	NA
864	1.32624e-19	0.48966	0.402	0.334	4.44794e-15	KCNIP4	UP	NA
865	1.61e-19	0.286193	0.182	0.097	5.39961e-15	ZNF273	UP	TF
866	1.88885e-19	0.262887	0.153	0.072	6.33484e-15	AP003354.2	UP	NA
867	2.08443e-19	0.294663	0.111	0.042	6.99075e-15	SLC17A7	UP	NA
868	2.09477e-19	0.251829	0.148	0.069	7.02544e-15	NOL3	UP	NA
869	2.58441e-19	0.437644	0.322	0.238	8.6676e-15	ALDH2	UP	NA
870	2.64517e-19	0.415762	0.531	0.458	8.87138e-15	SLC25A48	UP	NA
871	3.21542e-19	0.387619	0.258	0.171	1.07839e-14	HAGH	UP	NA
872	3.58032e-19	0.256983	0.132	0.057	1.20077e-14	CAMKK1	UP	NA
873	3.6759e-19	0.302391	0.762	0.737	1.23282e-14	CDHR3	UP	NA
874	6.08418e-19	0.412296	0.652	0.688	2.04051e-14	NRF1	UP	TF
875	6.68614e-19	0.435012	0.24	0.148	2.2424e-14	ADAM12	UP	NA
876	9.21348e-19	0.410996	0.486	0.452	3.09002e-14	ZNF451	UP	TF
877	1.11607e-18	0.496211	0.267	0.183	3.74307e-14	CC2D2B	UP	NA
878	1.35172e-18	0.28162	0.182	0.098	4.5334e-14	AC027808.1	UP	NA
879	1.37453e-18	0.448689	0.505	0.477	4.6099e-14	TMOD2	UP	NA
880	1.53139e-18	0.407658	0.375	0.285	5.13598e-14	ANKH	UP	NA
881	1.78006e-18	0.393067	0.214	0.133	5.96996e-14	COPS9	UP	NA
882	1.86219e-18	0.410428	0.338	0.251	6.2454e-14	AC105383.1	UP	NA
883	1.88613e-18	0.344838	0.217	0.131	6.32569e-14	ABHD8	UP	NA
884	2.52679e-18	0.475926	0.483	0.47	8.47434e-14	ITGA7	UP	NA
885	3.01035e-18	0.361283	0.242	0.15	1.00961e-13	LINC00886	UP	NA
886	3.76303e-18	0.429939	0.373	0.295	1.26205e-13	AK4	UP	NA
887	4.00362e-18	0.469748	0.399	0.327	1.34273e-13	GALNT7	UP	NA
888	4.04847e-18	0.256063	0.163	0.084	1.35778e-13	FAM13A-AS1	UP	NA
889	4.09458e-18	0.432093	0.344	0.275	1.37324e-13	PRDX6	UP	NA
890	4.33008e-18	0.272857	0.102	0.038	1.45222e-13	PIP5K1B	UP	NA
891	4.52758e-18	0.295747	0.119	0.049	1.51846e-13	TENT5A	UP	NA
892	5.51618e-18	0.423207	0.585	0.537	1.85002e-13	DPH6-DT	UP	NA
893	5.80773e-18	0.418679	0.63	0.603	1.9478e-13	UBA6-AS1	UP	NA
894	6.11406e-18	0.549673	0.528	0.54	2.05053e-13	CD81	UP	NA
895	7.26408e-18	0.302301	0.222	0.136	2.43623e-13	PPIE	UP	NA
896	7.63524e-18	0.423105	0.516	0.471	2.56071e-13	RAB30	UP	NA
897	7.77153e-18	0.387261	0.271	0.181	2.60641e-13	GFOD1	UP	NA
898	9.86461e-18	0.268412	0.144	0.069	3.30839e-13	AC244517.10	UP	NA
899	1.04749e-17	0.385104	0.629	0.627	3.51308e-13	ELF2	UP	TF
900	1.39822e-17	0.482491	0.38	0.283	4.68936e-13	AC110023.1	UP	NA
901	1.44763e-17	0.300807	0.171	0.092	4.85505e-13	HEATR4	UP	NA
902	1.5205e-17	0.418503	0.334	0.256	5.09946e-13	PHYHD1	UP	NA
903	2.15926e-17	0.423899	0.474	0.402	7.24173e-13	EFCAB2	UP	NA
904	2.18873e-17	0.31066	0.173	0.096	7.34055e-13	GAREM2	UP	NA
905	3.6821e-17	0.41917	0.594	0.62	1.2349e-12	ZNF280D	UP	TF
906	3.99177e-17	0.430216	0.543	0.543	1.33876e-12	ITGAV	UP	NA
907	4.81342e-17	0.325832	0.257	0.17	1.61432e-12	IDH2-DT	UP	NA
908	5.41726e-17	0.269812	0.196	0.114	1.81684e-12	HDDC2	UP	NA
909	6.23015e-17	0.324684	0.184	0.102	2.08947e-12	METTL24	UP	NA
910	7.05764e-17	0.42018	0.391	0.33	2.36699e-12	NR1D2	UP	TF
911	1.14788e-16	0.34625	0.693	0.68	3.84977e-12	FOXO3	UP	TF
912	1.43934e-16	0.415514	0.477	0.416	4.82726e-12	OXR1	UP	NA
913	1.54082e-16	0.400892	0.362	0.3	5.16761e-12	NUMA1	UP	NA
914	1.72322e-16	0.524642	0.43	0.38	5.77935e-12	SPRY4-AS1	UP	NA
915	1.93645e-16	0.475766	0.488	0.489	6.49446e-12	SRRM2	UP	NA
916	1.95094e-16	0.375787	0.306	0.224	6.54308e-12	TSHZ1	UP	NA
917	2.2857e-16	0.266444	0.146	0.074	7.66577e-12	RHOBTB2	UP	NA
918	2.34955e-16	0.350553	0.679	0.72	7.87991e-12	TDRD3	UP	NA
919	2.47324e-16	0.353876	0.677	0.72	8.29477e-12	EPB41L2	UP	NA
920	2.70718e-16	0.319072	0.22	0.138	9.07933e-12	SH3BGRL2	UP	NA
921	2.83274e-16	0.319992	0.588	0.548	9.50044e-12	PIK3R1	UP	NA
922	3.04267e-16	0.390549	0.257	0.181	1.02045e-11	HSPA12A	UP	NA
923	3.08216e-16	0.333304	0.722	0.822	1.0337e-11	2022-03-06	UP	NA
924	3.13508e-16	0.394337	0.666	0.713	1.05144e-11	CHD2	UP	TF
925	3.22547e-16	0.441372	0.39	0.33	1.08176e-11	OLMALINC	UP	NA
926	3.90369e-16	0.293218	0.189	0.109	1.30922e-11	RARB	UP	TF
927	4.11419e-16	0.330532	0.156	0.085	1.37982e-11	GRIN1	UP	NA
928	5.793e-16	0.38327	0.316	0.244	1.94286e-11	DTX1	UP	NA
929	6.96422e-16	0.291056	0.215	0.134	2.33566e-11	SOX13	UP	TF
930	9.37855e-16	0.461689	0.5	0.477	3.14538e-11	TFDP2	UP	TF
931	1.01906e-15	0.371142	0.4	0.329	3.41774e-11	CMTM4	UP	NA
932	1.31069e-15	0.376992	0.431	0.386	4.39579e-11	BTBD8	UP	NA
933	1.35568e-15	0.40199	0.734	0.829	4.54668e-11	LUC7L3	UP	NA
934	1.36451e-15	0.321463	0.148	0.079	4.57631e-11	PLCG1-AS1	UP	NA
935	1.63188e-15	0.275457	0.148	0.078	5.47302e-11	EMP1	UP	NA
936	1.80228e-15	0.334211	0.75	0.823	6.04449e-11	PHF21B	UP	NA
937	2.02213e-15	0.410049	0.496	0.478	6.78181e-11	CCDC92	UP	NA
938	2.09607e-15	0.269047	0.175	0.101	7.02981e-11	TXNL4B	UP	NA
939	2.29706e-15	0.333256	0.193	0.12	7.70388e-11	ANKRD9	UP	NA
940	2.6198e-15	0.413865	0.345	0.269	8.78627e-11	DNAJC6	UP	NA
941	2.88664e-15	0.370782	0.527	0.523	9.68122e-11	TP53BP2	UP	NA
942	4.47021e-15	0.366022	0.235	0.162	1.49922e-10	ADARB2	UP	NA
943	4.4871e-15	0.343038	0.258	0.182	1.50488e-10	SULT1A1	UP	NA
944	5.26781e-15	0.512041	0.889	0.937	1.76672e-10	DPP10	UP	NA
945	5.52788e-15	0.343067	0.267	0.197	1.85394e-10	KLF15	UP	TF
946	6.34445e-15	0.415202	0.591	0.612	2.1278e-10	RHOT1	UP	NA
947	6.92262e-15	0.405007	0.511	0.5	2.32171e-10	ZNF680	UP	TF
948	7.52241e-15	0.403096	0.537	0.545	2.52286e-10	MTMR1	UP	NA
949	7.89777e-15	0.424264	0.482	0.45	2.64875e-10	GNG7	UP	NA
950	7.97568e-15	0.316793	0.315	0.24	2.67488e-10	GCLC	UP	NA
951	8.6072e-15	0.281242	0.179	0.107	2.88668e-10	PIK3IP1	UP	NA
952	9.6146e-15	0.30309	0.274	0.189	3.22455e-10	EPAS1	UP	TF
953	1.09326e-14	0.405981	0.579	0.605	3.66657e-10	RAB11FIP2	UP	NA
954	1.28049e-14	0.258923	0.116	0.054	4.29452e-10	TBCE	UP	NA
955	1.51242e-14	0.397085	0.329	0.265	5.07234e-10	TEX2	UP	NA
956	1.84888e-14	0.287172	0.22	0.142	6.20078e-10	CHRDL1	UP	NA
957	1.97669e-14	0.430672	0.662	0.689	6.62944e-10	PRICKLE2	UP	NA
958	2.07766e-14	0.495334	0.491	0.441	6.96806e-10	TTN-AS1	UP	NA
959	2.35951e-14	0.368465	0.218	0.148	7.91334e-10	FSTL3	UP	NA
960	2.9758e-14	0.258106	0.114	0.052	9.98023e-10	HES5	UP	TF
961	3.37674e-14	0.261486	0.181	0.111	1.13249e-09	EML3	UP	NA
962	3.45205e-14	0.305387	0.726	0.686	1.15775e-09	RGS7	UP	NA
963	3.75344e-14	0.367905	0.341	0.276	1.25883e-09	ZDHHC2	UP	NA
964	4.23006e-14	0.364325	0.52	0.475	1.41868e-09	NRG2	UP	NA
965	5.56023e-14	0.367886	0.251	0.183	1.86479e-09	PGK1	UP	NA
966	5.693e-14	0.391477	0.433	0.406	1.90932e-09	RBBP6	UP	NA
967	5.78526e-14	0.407125	0.373	0.324	1.94026e-09	IDH2	UP	NA
968	5.821e-14	0.275705	0.122	0.06	1.95225e-09	DYNC1I1	UP	NA
969	6.45971e-14	0.453871	0.604	0.646	2.16646e-09	KLF7	UP	TF
970	6.50756e-14	0.39552	0.46	0.432	2.18251e-09	ADHFE1	UP	NA
971	6.68716e-14	0.481098	0.495	0.489	2.24274e-09	FADS2	UP	NA
972	6.75809e-14	0.339958	0.171	0.104	2.26653e-09	NPTXR	UP	NA
973	7.8799e-14	0.392718	0.346	0.289	2.64276e-09	GPC1	UP	NA
974	8.29452e-14	0.301473	0.737	0.783	2.78182e-09	FAM168A	UP	NA
975	8.9218e-14	0.411965	0.399	0.368	2.99219e-09	SAFB2	UP	NA
976	9.33684e-14	0.517929	0.411	0.384	3.13139e-09	PSMG4	UP	NA
977	1.09773e-13	0.387184	0.377	0.323	3.68157e-09	LINC00476	UP	NA
978	1.63263e-13	0.471701	0.255	0.183	5.47553e-09	KCNE4	UP	NA
979	1.65517e-13	0.351761	0.665	0.723	5.5511e-09	CASC4	UP	NA
980	1.88501e-13	0.365883	0.378	0.32	6.32195e-09	TMED8	UP	NA
981	1.93694e-13	0.332508	0.264	0.194	6.49613e-09	TSEN15	UP	NA
982	2.32594e-13	0.299415	0.763	0.881	7.80073e-09	KIAA1109	UP	NA
983	2.98254e-13	0.256222	0.145	0.082	1.00028e-08	LMTK3	UP	NA
984	3.19962e-13	0.292452	0.187	0.117	1.07309e-08	MROH8	UP	NA
985	3.89005e-13	0.387771	0.423	0.387	1.30465e-08	LINC02340	UP	NA
986	4.60618e-13	0.528847	0.522	0.537	1.54482e-08	ITGB4	UP	NA
987	4.71055e-13	0.358676	0.351	0.292	1.57982e-08	CYBRD1	UP	NA
988	5.3873e-13	0.2947	0.25	0.174	1.80679e-08	CLMN	UP	NA
989	5.74937e-13	0.375407	0.613	0.633	1.92822e-08	CRIM1	UP	NA
990	6.30201e-13	0.403992	0.568	0.611	2.11357e-08	ZNF721	UP	TF
991	6.39125e-13	0.333806	0.67	0.749	2.1435e-08	PIAS1	UP	NA
992	7.36949e-13	0.596833	0.517	0.52	2.47158e-08	SEM1	UP	NA
993	8.02429e-13	0.391425	0.229	0.164	2.69119e-08	RYR1	UP	NA
994	9.72904e-13	0.38584	0.541	0.517	3.26293e-08	LINC00882	UP	NA
995	9.75558e-13	0.433481	0.359	0.315	3.27183e-08	TMEM47	UP	NA
996	1.21221e-12	0.299649	0.227	0.159	4.06552e-08	MAP3K3	UP	NA
997	1.42491e-12	0.444072	0.261	0.2	4.77886e-08	CDKL1	UP	NA
998	1.43883e-12	0.263019	0.174	0.108	4.82555e-08	AC105285.1	UP	NA
999	1.77493e-12	0.387408	0.473	0.474	5.95276e-08	IL6ST	UP	NA
1000	1.79367e-12	0.336235	0.337	0.279	6.01561e-08	NCK2	UP	NA
1001	1.82201e-12	0.302866	0.265	0.197	6.11067e-08	NTNG2	UP	NA
1002	2.08104e-12	0.356279	0.683	0.757	6.97941e-08	FCHSD2	UP	NA
1003	2.13768e-12	0.382489	0.397	0.363	7.16935e-08	ITPK1	UP	NA
1004	3.68754e-12	0.311188	0.243	0.174	1.23673e-07	NCEH1	UP	NA
1005	3.72087e-12	0.343122	0.208	0.137	1.24791e-07	AC034195.1	UP	NA
1006	4.68286e-12	0.251229	0.176	0.111	1.57054e-07	CGRRF1	UP	NA
1007	4.94379e-12	0.428029	0.407	0.391	1.65805e-07	SPPL2B	UP	NA
1008	5.32033e-12	0.262716	0.118	0.062	1.78433e-07	AC130324.2	UP	NA
1009	5.33279e-12	0.385989	0.426	0.382	1.78851e-07	SLC6A11	UP	NA
1010	5.71799e-12	0.403362	0.535	0.568	1.9177e-07	GOLGB1	UP	NA
1011	5.94346e-12	0.379125	0.474	0.469	1.99332e-07	IRF2	UP	TF
1012	6.42979e-12	0.29803	0.159	0.099	2.15642e-07	RHBDD2	UP	NA
1013	7.21677e-12	0.368193	0.266	0.202	2.42036e-07	AL136164.2	UP	NA
1014	7.48757e-12	0.344985	0.272	0.215	2.51118e-07	CDIP1	UP	NA
1015	7.60079e-12	0.263314	0.685	0.727	2.54915e-07	GOLIM4	UP	NA
1016	7.69641e-12	0.435926	0.272	0.2	2.58122e-07	LINC01266	UP	NA
1017	8.02055e-12	0.399264	0.49	0.485	2.68993e-07	SCGB2B2	UP	NA
1018	8.45959e-12	0.369244	0.493	0.473	2.83718e-07	DTNB	UP	NA
1019	9.22672e-12	0.300181	0.212	0.146	3.09446e-07	GAS2	UP	NA
1020	9.63745e-12	0.354971	0.592	0.642	3.23221e-07	ABHD2	UP	NA
1021	1.07347e-11	0.35548	0.376	0.324	3.60021e-07	GRK4	UP	NA
1022	1.17053e-11	0.347955	0.209	0.149	3.92572e-07	MAPK11	UP	NA
1023	1.2363e-11	0.287532	0.208	0.145	4.14631e-07	TMEM220	UP	NA
1024	1.95281e-11	0.331476	0.365	0.317	6.54935e-07	FDFT1	UP	NA
1025	2.29842e-11	0.383178	0.422	0.395	7.70844e-07	CRYL1	UP	NA
1026	2.61861e-11	0.263314	0.199	0.138	8.78228e-07	RAB34	UP	NA
1027	2.88852e-11	0.294842	0.176	0.118	9.68751e-07	GPS1	UP	NA
1028	2.89078e-11	0.298063	0.241	0.176	9.69511e-07	AC006978.2	UP	NA
1029	3.04725e-11	0.494782	0.503	0.509	1.02199e-06	OSMR-AS1	UP	NA
1030	3.48982e-11	0.432882	0.167	0.108	1.17041e-06	GALNT15	UP	NA
1031	4.08263e-11	0.361175	0.455	0.442	1.36923e-06	HMGN3	UP	TF
1032	5.01852e-11	0.34337	0.246	0.184	1.68311e-06	RELL1	UP	NA
1033	5.20874e-11	0.312668	0.3	0.237	1.74691e-06	TMEM220-AS1	UP	NA
1034	5.27847e-11	0.338965	0.295	0.241	1.77029e-06	BDH1	UP	NA
1035	5.55231e-11	0.345002	0.515	0.499	1.86213e-06	ZNF423	UP	TF
1036	5.70196e-11	0.330788	0.265	0.203	1.91232e-06	AC009403.1	UP	NA
1037	7.08104e-11	0.346436	0.591	0.654	2.37484e-06	SPTAN1	UP	NA
1038	7.14365e-11	0.328541	0.772	0.902	2.39584e-06	AC245297.3	UP	NA
1039	7.74565e-11	0.257606	0.165	0.109	2.59774e-06	FASN	UP	NA
1040	9.09842e-11	0.364428	0.492	0.489	3.05143e-06	PPARA	UP	TF
1041	1.20186e-10	0.274666	0.709	0.69	4.03081e-06	CRADD	UP	NA
1042	1.50671e-10	0.275245	0.642	0.67	5.05321e-06	WASF3	UP	NA
1043	1.94761e-10	0.332938	0.281	0.229	6.53189e-06	ZNF621	UP	TF
1044	2.08765e-10	0.283485	0.714	0.806	7.00155e-06	ZNF518A	UP	NA
1045	2.14749e-10	0.412625	0.284	0.245	7.20226e-06	DNAJB2	UP	NA
1046	2.52832e-10	0.333727	0.609	0.673	8.47949e-06	EPS15L1	UP	NA
1047	2.67363e-10	0.275529	0.791	0.903	8.96681e-06	MYO9A	UP	NA
1048	2.78135e-10	0.373252	0.304	0.264	9.32808e-06	LDHB	UP	NA
1049	2.78787e-10	0.356528	0.457	0.449	9.34995e-06	LINC01004	UP	NA
1050	2.87922e-10	0.290146	0.27	0.216	9.65634e-06	KBTBD11	UP	NA
1051	2.93361e-10	0.299027	0.203	0.148	9.83873e-06	GIT1	UP	NA
1052	3.44302e-10	0.340498	0.419	0.394	1.15472e-05	CFAP70	UP	NA
1053	4.6456e-10	0.34152	0.32	0.271	1.55804e-05	ST3GAL5	UP	NA
1054	5.30034e-10	0.380405	0.412	0.397	1.77763e-05	CDKL5	UP	NA
1055	6.1567e-10	0.374253	0.551	0.586	2.06483e-05	AC116366.3	UP	NA
1056	6.23221e-10	0.391984	0.171	0.115	2.09016e-05	ABI3BP	UP	NA
1057	8.10098e-10	0.360067	0.376	0.34	2.71691e-05	RNF144A	UP	NA
1058	8.18265e-10	0.45121	0.531	0.569	2.7443e-05	P4HA1	UP	NA
1059	9.66222e-10	0.359578	0.305	0.251	3.24052e-05	LEPR	UP	NA
1060	9.93976e-10	0.331976	0.245	0.197	3.3336e-05	NRSN2-AS1	UP	NA
1061	1.07391e-09	0.256567	0.235	0.169	3.6017e-05	LINC02328	UP	NA
1062	1.13377e-09	0.341429	0.282	0.215	3.80242e-05	C8orf37-AS1	UP	NA
1063	1.15105e-09	0.264662	0.188	0.134	3.86038e-05	MKNK2	UP	NA
1064	1.19582e-09	0.341521	0.225	0.173	4.01055e-05	PFKFB2	UP	NA
1065	1.23631e-09	0.341838	0.413	0.364	4.14633e-05	JAZF1	UP	TF
1066	1.25021e-09	0.383476	0.477	0.489	4.19296e-05	EEF2K	UP	NA
1067	1.29433e-09	0.370467	0.348	0.316	4.34094e-05	SORBS3	UP	NA
1068	1.4448e-09	0.3086	0.264	0.214	4.84558e-05	TNK2	UP	NA
1069	1.57612e-09	0.266113	0.158	0.106	5.286e-05	TPI1	UP	TF
1070	1.59726e-09	0.345352	0.418	0.386	5.35689e-05	WNK2	UP	NA
1071	2.00398e-09	0.326737	0.544	0.565	6.72096e-05	DCAF6	UP	NA
1072	2.06451e-09	0.281225	0.674	0.702	6.92395e-05	GPD2	UP	NA
1073	2.11612e-09	0.306371	0.29	0.246	7.09705e-05	MYO15B	UP	NA
1074	2.316e-09	0.394041	0.51	0.563	7.76741e-05	ACADVL	UP	NA
1075	2.56278e-09	0.361632	0.153	0.097	8.59505e-05	AC104574.2	UP	NA
1076	3.30041e-09	0.389169	0.412	0.403	0.000110689	BCAT2	UP	NA
1077	3.47627e-09	0.30327	0.323	0.274	0.000116587	E2F3	UP	TF
1078	3.65718e-09	0.252625	0.198	0.143	0.000122654	COTL1	UP	NA
1079	3.70806e-09	0.349291	0.415	0.394	0.000124361	ANXA4	UP	NA
1080	3.90076e-09	0.323295	0.197	0.147	0.000130824	HAGHL	UP	NA
1081	4.33047e-09	0.32823	0.254	0.211	0.000145235	ABCA2	UP	NA
1082	6.40527e-09	0.26543	0.728	0.82	0.00021482	PPP1R12B	UP	NA
1083	6.41237e-09	0.253389	0.199	0.143	0.000215058	APLF	UP	NA
1084	6.71222e-09	0.326502	0.301	0.26	0.000225114	ADCY3	UP	NA
1085	6.93896e-09	0.306591	0.382	0.34	0.000232719	ENTPD3-AS1	UP	NA
1086	7.65427e-09	0.3888	0.546	0.615	0.000256709	DDX5	UP	NA
1087	8.97384e-09	0.364218	0.555	0.606	0.000300965	KIAA2026	UP	NA
1088	9.98477e-09	0.324915	0.577	0.569	0.000334869	TMTC1	UP	NA
1089	1.09879e-08	0.284097	0.507	0.494	0.000368512	CDH11	UP	NA
1090	1.25921e-08	0.272239	0.22	0.169	0.000422315	MGAT4A	UP	NA
1091	1.27292e-08	0.315029	0.528	0.54	0.000426911	PPP2R5A	UP	NA
1092	1.41236e-08	0.317131	0.347	0.316	0.000473676	SMOX	UP	NA
1093	1.54506e-08	0.305732	0.249	0.203	0.000518182	LINC01896	UP	NA
1094	1.62369e-08	0.357884	0.381	0.362	0.000544554	PYGB	UP	NA
1095	1.64035e-08	0.35152	0.286	0.253	0.00055014	CNTFR	UP	NA
1096	1.85871e-08	0.379303	0.427	0.429	0.000623375	TOB2	UP	TF
1097	2.34768e-08	0.35482	0.384	0.354	0.000787366	LINC02060	UP	NA
1098	2.6048e-08	0.327342	0.35	0.326	0.000873597	PURA	UP	TF
1099	2.70794e-08	0.391962	0.409	0.401	0.000908188	HSDL2	UP	NA
1100	3.79078e-08	0.460468	0.246	0.204	0.00127135	ERC2	UP	NA
1101	4.16695e-08	0.317245	0.328	0.298	0.00139751	HDAC7	UP	NA
1102	4.2267e-08	0.313097	0.623	0.691	0.00141755	PTPN4	UP	NA
1103	4.71431e-08	0.290854	0.195	0.149	0.00158109	NLGN3	UP	NA
1104	4.86658e-08	0.291879	0.227	0.18	0.00163215	VXN	UP	NA
1105	5.1724e-08	0.347774	0.422	0.417	0.00173472	ESYT2	UP	NA
1106	5.21537e-08	0.266093	0.263	0.222	0.00174913	AKAP1	UP	NA
1107	5.82212e-08	0.292902	0.193	0.149	0.00195262	CSNK1E	UP	NA
1108	5.98049e-08	0.441921	0.43	0.444	0.00200574	BNIP3L	UP	NA
1109	6.59742e-08	0.337419	0.356	0.335	0.00221264	TTC7A	UP	NA
1110	6.80929e-08	0.305584	0.275	0.235	0.0022837	MAPRE3	UP	NA
1111	6.92986e-08	0.386575	0.381	0.377	0.00232414	ANO8	UP	NA
1112	7.73725e-08	0.339306	0.544	0.598	0.00259492	ZXDC	UP	TF
1113	8.61195e-08	0.325577	0.35	0.334	0.00288828	TMEM94	UP	NA
1114	1.16373e-07	0.268758	0.228	0.184	0.00390292	PIEZO1	UP	NA
1115	1.19639e-07	0.343024	0.391	0.389	0.00401245	RXRA	UP	TF
1116	1.26995e-07	0.354491	0.42	0.403	0.00425917	MCPH1	UP	NA
1117	1.28971e-07	0.281838	0.31	0.278	0.00432542	BAZ2A	UP	NA
1118	1.34034e-07	0.28073	0.138	0.094	0.00449525	NEB	UP	NA
1119	1.47423e-07	0.267771	0.253	0.214	0.00494426	FAM199X	UP	NA
1120	1.53585e-07	0.303227	0.311	0.26	0.00515095	BMPER	UP	NA
1121	1.6272e-07	0.299933	0.569	0.604	0.0054573	TRPC1	UP	NA
1122	1.76957e-07	0.33006	0.492	0.51	0.0059348	USP3	UP	NA
1123	1.84532e-07	0.328618	0.574	0.62	0.00618882	RALGPS1	UP	NA
1124	1.8487e-07	0.27651	0.221	0.179	0.00620017	SCARB1	UP	NA
1125	1.94457e-07	0.311243	0.154	0.107	0.00652171	BNC2	UP	TF
1126	1.96147e-07	0.28107	0.271	0.237	0.00657837	FBXO7	UP	NA
1127	2.01049e-07	0.354539	0.566	0.65	0.00674279	TTC14	UP	NA
1128	2.54756e-07	0.333859	0.412	0.389	0.00854402	LINC01376	UP	NA
1129	2.56538e-07	0.270039	0.622	0.684	0.00860378	FAM85B	UP	NA
1130	2.68017e-07	0.372396	0.508	0.561	0.00898876	NFIC	UP	TF
1131	2.75635e-07	0.321226	0.262	0.229	0.00924423	KCTD13	UP	NA
1132	2.96567e-07	0.369583	0.428	0.423	0.00994626	MKRN3	UP	NA
1133	3.01821e-07	0.320015	0.516	0.559	0.0101225	MAT2A	UP	NA
1134	3.54924e-07	0.285381	0.311	0.28	0.0119034	PC	UP	NA
1135	4.3063e-07	0.327461	0.362	0.341	0.0144425	KNDC1	UP	NA
1136	4.68692e-07	0.25268	0.179	0.139	0.015719	MYORG	UP	NA
1137	5.25994e-07	0.324796	0.567	0.64	0.0176408	NUCKS1	UP	NA
1138	5.964e-07	0.261698	0.257	0.217	0.0200021	TMEM170B	UP	NA
1139	5.99789e-07	0.320261	0.406	0.408	0.0201157	SCP2	UP	NA
1140	5.99981e-07	0.287127	0.51	0.5	0.0201222	ADCY9	UP	NA
1141	6.14275e-07	0.291663	0.613	0.688	0.0206015	WIPF2	UP	NA
1142	6.34145e-07	0.336192	0.535	0.584	0.0212679	NIPSNAP2	UP	NA
1143	6.96952e-07	0.367984	0.535	0.594	0.0233744	CALM1	UP	NA
1144	1.06411e-06	0.251871	0.243	0.209	0.0356882	PEX2	UP	NA
1145	1.16116e-06	0.280925	0.379	0.357	0.0389431	FRMPD2	UP	NA
1146	1.22527e-06	0.257941	0.248	0.209	0.0410931	SIRT5	UP	NA
1147	1.31522e-06	0.320917	0.474	0.506	0.0441099	AHCTF1	UP	TF
1148	1.39451e-06	0.262036	0.553	0.557	0.0467692	PLCH1	UP	NA
1149	1.42596e-06	0.31911	0.304	0.277	0.047824	NUP50-DT	UP	NA
1150	1.45705e-06	0.358898	0.399	0.399	0.0488666	LAMA4	UP	NA
1151	1.46078e-06	0.303814	0.477	0.452	0.0489916	CASC2	UP	NA
1152	1.5756e-06	0.292895	0.377	0.378	0.0528423	ATP5F1C	UP	NA
1153	1.61833e-06	0.278126	0.234	0.197	0.0542757	LHPP	UP	NA
1154	1.62638e-06	0.314758	0.443	0.466	0.0545457	SLC25A29	UP	NA
1155	1.85048e-06	0.332591	0.467	0.496	0.0620614	GPI	UP	NA
1156	2.25955e-06	0.312315	0.31	0.283	0.0757807	GANC	UP	NA
1157	2.36074e-06	0.254373	0.205	0.168	0.0791744	KIAA1551	UP	NA
1158	2.49619e-06	0.283927	0.257	0.223	0.0837171	SSX2IP	UP	NA
1159	2.53107e-06	0.28743	0.651	0.721	0.084887	KIF13A	UP	NA
1160	3.08628e-06	0.262446	0.239	0.203	0.103508	IFITM3	UP	NA
1161	3.14976e-06	0.499989	0.306	0.29	0.105637	AC006059.1	UP	NA
1162	3.29411e-06	0.297295	0.445	0.44	0.110478	PCDH17	UP	NA
1163	4.47656e-06	0.316035	0.49	0.511	0.150135	ATP6AP1L	UP	NA
1164	4.5079e-06	0.31016	0.3	0.285	0.151186	INPPL1	UP	NA
1165	4.81157e-06	0.262589	0.254	0.22	0.16137	GPR155	UP	NA
1166	5.27715e-06	0.316958	0.348	0.33	0.176985	TMEM150C	UP	NA
1167	5.86824e-06	0.31005	0.641	0.751	0.196809	AKAP9	UP	NA
1168	6.54936e-06	0.256449	0.17	0.135	0.219653	AC105052.1	UP	NA
1169	7.27448e-06	0.294111	0.278	0.257	0.243972	TCAF1	UP	NA
1170	7.87054e-06	0.250169	0.236	0.205	0.263962	SPEG	UP	NA
1171	8.39538e-06	0.293874	0.66	0.774	0.281564	SNRNP70	UP	TF
1172	8.5571e-06	0.323454	0.585	0.663	0.286988	SYT11	UP	NA
1173	9.06067e-06	0.307696	0.324	0.315	0.303877	MKNK1	UP	NA
1174	9.12819e-06	0.255697	0.444	0.444	0.306141	SMAD3	UP	TF
1175	9.1614e-06	0.302361	0.44	0.43	0.307255	AC091948.1	UP	NA
1176	9.53137e-06	0.283115	0.357	0.35	0.319663	ELMO2	UP	NA
1177	9.90621e-06	0.298166	0.578	0.668	0.332234	WDR60	UP	NA
1178	1.03585e-05	0.250689	0.656	0.768	0.347402	MED13	UP	NA
1179	1.27435e-05	0.294273	0.527	0.567	0.427392	BICRAL	UP	NA
1180	1.29587e-05	0.252566	0.689	0.797	0.43461	NUMB	UP	NA
1181	1.46466e-05	0.309421	0.327	0.306	0.491219	CMYA5	UP	NA
1182	1.63835e-05	0.266765	0.274	0.244	0.549469	LANCL2	UP	NA
1183	1.80114e-05	0.296043	0.351	0.327	0.604067	COLGALT2	UP	NA
1184	1.87873e-05	0.311378	0.288	0.272	0.630087	AXL	UP	NA
1185	1.90991e-05	0.275265	0.276	0.249	0.640546	GDPD1	UP	NA
1186	1.99315e-05	0.344702	0.438	0.476	0.668463	ZCCHC24	UP	NA
1187	2.09578e-05	0.292062	0.308	0.289	0.702883	ZNF782	UP	TF
1188	2.33006e-05	0.297944	0.462	0.494	0.781455	DPP8	UP	NA
1189	2.44551e-05	0.327305	0.411	0.418	0.820174	GPSM2	UP	NA
1190	2.49757e-05	0.27029	0.254	0.229	0.837634	THRA	UP	TF
1191	2.69545e-05	0.31104	0.394	0.409	0.904001	RBL2	UP	NA
1192	2.7472e-05	0.32262	0.333	0.326	0.921355	MRPS6	UP	NA
1193	3.08693e-05	0.563565	0.319	0.311	1	IQCJ-SCHIP1	UP	NA
1194	3.17582e-05	0.349643	0.376	0.377	1	ATG4C	UP	NA
1195	3.23533e-05	0.269245	0.494	0.536	1	YLPM1	UP	NA
1196	3.28007e-05	0.31242	0.232	0.207	1	UTP23	UP	NA
1197	3.33714e-05	0.318822	0.504	0.559	1	NFIX	UP	TF
1198	4.4047e-05	0.290148	0.354	0.355	1	AL391807.1	UP	NA
1199	4.98814e-05	0.293341	0.401	0.389	1	AC091078.1	UP	NA
1200	5.01458e-05	0.286893	0.47	0.482	1	TRAF3	UP	NA
1201	5.4098e-05	0.270193	0.465	0.472	1	AKAP7	UP	NA
1202	5.45744e-05	0.261483	0.471	0.478	1	STX18-AS1	UP	NA
1203	5.66591e-05	0.255931	0.534	0.548	1	MAN2A1	UP	NA
1204	6.49805e-05	0.289059	0.632	0.745	1	ERI3	UP	NA
1205	7.47302e-05	0.322497	0.553	0.659	1	NBPF19	UP	NA
1206	7.58142e-05	0.321668	0.45	0.476	1	WDR11-AS1	UP	NA
1207	7.7748e-05	0.263661	0.323	0.305	1	EGLN1	UP	NA
1208	8.05136e-05	0.357042	0.4	0.423	1	CRY2	UP	NA
1209	9.37432e-05	0.356305	0.596	0.7	1	ADGRG1	UP	NA
1210	9.80661e-05	0.257675	0.289	0.277	1	TMEM106B	UP	NA
1211	0.000103054	0.307378	0.469	0.484	1	PIR	UP	TF
1212	0.000130729	0.288449	0.281	0.272	1	MSL1	UP	NA
1213	0.000137451	0.25102	0.243	0.221	1	CTNNBIP1	UP	NA
1214	0.000148085	0.318182	0.321	0.327	1	DYNLL1	UP	NA
1215	0.000180788	0.305701	0.469	0.518	1	SPOP	UP	NA
1216	0.00018746	0.269946	0.285	0.277	1	NME3	UP	NA
1217	0.000196025	0.299154	0.418	0.434	1	RNF217	UP	NA
1218	0.000231679	0.31503	0.413	0.456	1	C6orf62	UP	NA
1219	0.00023258	0.295328	0.472	0.495	1	BBOX1	UP	NA
1220	0.000234797	0.255478	0.227	0.211	1	PNPLA6	UP	NA
1221	0.000251812	0.253176	0.273	0.262	1	AL117335.1	UP	NA
1222	0.000254008	0.260195	0.552	0.619	1	KLHL24	UP	NA
1223	0.000254635	0.277784	0.239	0.22	1	ZNF318	UP	NA
1224	0.000281644	0.334522	0.355	0.363	1	AC125613.1	UP	NA
1225	0.000281654	0.28079	0.226	0.204	1	MMP24OS	UP	NA
1226	0.000287288	0.266557	0.583	0.707	1	MPRIP	UP	NA
1227	0.000320971	0.277197	0.445	0.491	1	ITM2B	UP	NA
1228	0.000321018	0.308098	0.382	0.404	1	AC005154.6	UP	NA
1229	0.000326436	0.31727	0.451	0.466	1	PKIA	UP	NA
1230	0.000363266	0.304521	0.512	0.587	1	SUGP2	UP	NA
1231	0.000401422	0.264561	0.28	0.261	1	UACA	UP	NA
1232	0.00043007	0.268301	0.273	0.261	1	GYS1	UP	NA
1233	0.000603043	0.251625	0.343	0.336	1	PARVA	UP	NA
1234	0.000606838	0.344063	0.753	0.863	1	APOE	UP	NA
1235	0.000614913	0.343133	0.265	0.261	1	ACAP3	UP	NA
1236	0.000655937	0.260909	0.466	0.489	1	CCDC171	UP	NA
1237	0.000739112	0.257671	0.252	0.24	1	SYNGR1	UP	NA
1238	0.000819093	0.360602	0.382	0.382	1	MCF2L2	UP	NA
1239	0.000845595	0.281936	0.321	0.315	1	DNAJC27-AS1	UP	NA
1240	0.00100364	0.261408	0.436	0.48	1	TMEM245	UP	NA
1241	0.00104756	0.304788	0.416	0.458	1	ZBTB8OS	UP	NA
1242	0.00120309	0.317423	0.272	0.27	1	TECR	UP	NA
1243	0.00120464	0.289858	0.49	0.543	1	PPP2CB	UP	NA
1244	0.00123878	0.313812	0.419	0.46	1	FZD3	UP	NA
1245	0.00126924	0.265016	0.293	0.29	1	LMF1	UP	NA
1246	0.00140627	0.268579	0.399	0.405	1	DSE	UP	NA
1247	0.00141404	0.285493	0.418	0.451	1	KDM3A	UP	NA
1248	0.0016322	0.318743	0.306	0.313	1	NPC1	UP	NA
1249	0.00169625	0.317309	0.509	0.569	1	GDAP1	UP	NA
1250	0.00186626	0.283164	0.393	0.431	1	CPSF7	UP	NA
1251	0.00189302	0.274499	0.465	0.513	1	HACD3	UP	NA
1252	0.0019003	0.280297	0.301	0.304	1	PCDH10	UP	NA
1253	0.00226204	0.263901	0.426	0.437	1	PPARGC1A	UP	TF
1254	0.00245929	0.316263	0.427	0.48	1	AKAP8L	UP	NA
1255	0.00305569	0.251004	0.66	0.787	1	JPX	UP	NA
1256	0.00310338	0.298984	0.416	0.463	1	ZBTB1	UP	TF
1257	0.00320114	0.284351	0.423	0.471	1	TRIP11	UP	NA
1258	0.00333899	0.26936	0.336	0.337	1	MAMLD1	UP	NA
1259	0.00335087	0.322928	0.422	0.457	1	CDR2	UP	NA
1260	0.00346875	0.302885	0.359	0.375	1	IL17D	UP	NA
1261	0.003601	0.271863	0.58	0.671	1	SERINC5	UP	NA
1262	0.00391472	0.277694	0.351	0.377	1	SH3BP2	UP	NA
1263	0.00403587	0.31012	0.359	0.368	1	LIX1-AS1	UP	NA
1264	0.00417284	0.301969	0.471	0.54	1	UBN2	UP	NA
1265	0.00567403	0.289436	0.465	0.515	1	JAK1	UP	NA
1266	0.00573966	0.266367	0.532	0.624	1	TTC19	UP	NA
1267	0.00658065	0.309908	0.364	0.39	1	PATJ	UP	NA
1268	0.0066176	0.288425	0.39	0.42	1	AGTPBP1	UP	NA
1269	0.00677612	0.333129	0.222	0.212	1	STXBP5L	UP	NA
1270	0.00839547	0.282065	0.241	0.24	1	DGKZ	UP	NA
1271	0.0093087	0.258062	0.246	0.243	1	DUT	UP	NA
1272	0.0107992	0.255696	0.478	0.551	1	GPBP1L1	UP	NA
1273	0.0114264	0.296703	0.274	0.263	1	PPP1R3C	UP	NA
1274	0.0116688	0.349964	0.14	0.125	1	CALN1	UP	NA
1275	0.0130165	0.272458	0.245	0.236	1	ARSB	UP	NA
1276	0.0151169	0.280503	0.322	0.337	1	SUFU	UP	NA
1277	0.0234933	0.2662	0.262	0.271	1	CAMK2N1	UP	NA
1278	0.0238546	0.255991	0.376	0.412	1	THBS4	UP	NA
1279	0.0244882	0.26019	0.257	0.265	1	BSDC1	UP	NA
1280	4.51734e-19	0.269131	0.237	0.172	1.51502e-14	SRCIN1	UP	NA
1281	7.97338e-19	0.278322	0.314	0.253	2.67411e-14	CCP110	UP	NA
1282	1.52386e-18	0.330671	0.349	0.294	5.11072e-14	NCOA7	UP	NA
1283	2.18631e-18	0.282094	0.341	0.274	7.33244e-14	LIX1-AS1	UP	NA
1284	3.66231e-18	0.280843	0.312	0.25	1.22827e-13	COL27A1	UP	NA
1285	3.95922e-18	0.371694	0.535	0.508	1.32784e-13	CDK19	UP	NA
1286	5.01446e-18	0.298478	0.471	0.43	1.68175e-13	NBPF19	UP	NA
1287	1.46249e-17	0.256689	0.447	0.392	4.90489e-13	ZBTB8OS	UP	NA
1288	1.10398e-16	0.335234	0.153	0.235	3.70251e-12	GALNT17	UP	NA
1289	1.20246e-16	0.2673	0.44	0.39	4.0328e-12	PTPRJ	UP	NA
1290	4.87705e-16	0.2754	0.477	0.408	1.63566e-11	WDR49	UP	NA
1291	6.18759e-16	1.81818	0.375	0.371	2.07519e-11	CTNNA3	UP	NA
1292	6.917e-16	0.336882	0.381	0.343	2.31982e-11	ADIPOR2	UP	NA
1293	1.90749e-15	0.25906	0.422	0.371	6.39735e-11	CDR2	UP	NA
1294	3.65856e-15	0.816873	0.38	0.493	1.22701e-10	SYT1	UP	NA
1295	4.73443e-15	0.36414	0.159	0.239	1.58783e-10	PCDH15	UP	NA
1296	4.32717e-14	0.253666	0.758	0.686	1.45125e-09	TMTC2	UP	NA
1297	1.15734e-13	0.57112	0.417	0.408	3.88147e-09	PXK	UP	NA
1298	1.94114e-13	0.766949	0.295	0.385	6.5102e-09	OPCML	UP	NA
1299	2.84603e-13	0.806273	0.34	0.315	9.54502e-09	PDE1C	UP	NA
1300	1.6516e-12	0.34194	0.398	0.363	5.53914e-08	ZDHHC20	UP	NA
1301	4.20873e-12	0.536116	0.119	0.079	1.41152e-07	SLC35F3	UP	NA
1302	5.93223e-11	0.556881	0.713	0.662	1.98955e-06	DMD	UP	NA
1303	5.94812e-11	0.361278	0.643	0.591	1.99488e-06	PPFIA2	UP	NA
1304	8.46372e-11	0.469254	0.602	0.625	2.83856e-06	FRYL	UP	NA
1305	9.742e-11	0.348997	0.268	0.215	3.26727e-06	CALN1	UP	NA
1306	1.03705e-10	0.277618	0.238	0.184	3.47806e-06	TNR	UP	NA
1307	1.2119e-10	0.32528	0.178	0.136	4.06446e-06	IGFBP5	UP	NA
1308	1.47944e-10	0.709906	0.306	0.277	4.96173e-06	KIRREL3	UP	NA
1309	1.89051e-10	0.268417	0.295	0.255	6.34039e-06	TTLL11	UP	NA
1310	2.55083e-10	0.5031	0.203	0.276	8.55499e-06	RALYL	UP	NA
1311	4.16784e-10	0.28906	0.305	0.261	1.39781e-05	BAALC-AS1	UP	NA
1312	7.29447e-10	0.298947	0.28	0.356	2.44642e-05	NELL2	UP	NA
1313	1.43398e-09	0.329485	0.217	0.176	4.80929e-05	RAPGEF4	UP	NA
1314	2.38763e-09	0.270031	0.318	0.28	8.00763e-05	UFL1-AS1	UP	NA
1315	3.71291e-09	0.363521	0.267	0.228	0.000124523	MOXD1	UP	NA
1316	3.26191e-08	0.316837	0.142	0.198	0.00109398	AC090568.2	UP	NA
1317	5.54951e-08	0.610458	0.179	0.237	0.00186119	GRM7	UP	NA
1318	1.03393e-07	0.310081	0.175	0.227	0.0034676	DLGAP2	UP	NA
1319	6.07015e-07	0.666563	0.275	0.267	0.0203581	FRMD4B	UP	NA
1320	1.6314e-06	0.518981	0.249	0.307	0.0547137	ST6GALNAC5	UP	NA
1321	3.35315e-06	0.562388	0.167	0.139	0.112458	CCDC85A	UP	NA
1322	6.41367e-06	0.257641	0.145	0.118	0.215102	MICAL2	UP	NA
1323	1.11565e-05	0.610281	0.188	0.161	0.374168	CHSY3	UP	NA
1324	2.8586e-05	0.517844	0.182	0.158	0.958719	GRM1	UP	NA
1325	3.34935e-05	0.466654	0.364	0.35	1	SHISA6	UP	NA
1326	5.55728e-05	0.45665	0.181	0.158	1	C8orf34	UP	NA
1327	6.89309e-05	0.516193	0.315	0.289	1	ERC2	UP	NA
1328	7.87374e-05	0.378278	0.325	0.371	1	KCTD16	UP	NA
1329	0.000248666	0.355281	0.12	0.101	1	SUSD4	UP	NA
1330	0.000332929	0.331902	0.246	0.238	1	FAM107B	UP	NA
1331	0.000388862	0.273507	0.659	0.697	1	ZEB2	UP	TF
1332	0.00101857	0.789179	0.17	0.149	1	CLSTN2	UP	NA
1333	0.00175917	0.484142	0.541	0.541	1	FGF14	UP	NA
1334	0.00267987	0.499482	0.419	0.522	1	ANK3	UP	NA
1335	0.00277757	0.279597	0.687	0.72	1	DLG1	UP	NA
1336	0.00892	0.323159	0.229	0.283	1	KCNH8	UP	NA
1337	0.0115321	0.916469	0.369	0.428	1	PRUNE2	UP	NA
1338	0.0136515	0.26379	0.425	0.465	1	DAB1	UP	NA
1339	0.0238059	0.434641	0.129	0.119	1	HCN1	UP	NA

## Sheet: Fig5F qNSC1 upregulated GOs 
GO terms of up-regulated genes from qNSC1 during aging
ID	Description	GeneRatio	BgRatio	pvalue	p.adjust	qvalue	geneID	Count
GO:0031175	neuron projection development	64/998	456/16374	3.06488e-10	1.28112e-06	1.14497e-06	DNM3/PREX2/SLC39A12/LGI1/CNTN1/PARD3/NTRK2/MICALL2/GJA1/BCL2/CTNNA2/KIAA0319/ALK/EPHA4/CAMK2B/EPHB1/MAGI2/LRP4/PLXNB1/KANK1/GPM6A/CD38/ABI1/TRAK1/LAMA1/RAP1GAP2/FGFR2/SPOCK1/S100B/CAMK2A/PRRX1/PDLIM5/COBL/EFHD1/CAMK1D/SEMA4A/MINK1/MT3/AGT/PMP22/PREX1/TIAM1/NRP1/KALRN/FARP1/NCDN/NDRG4/ITM2C/PTPN9/BTBD8/KLF7/CLMN/NCK2/NTNG2/CDKL5/EEF2K/NLGN3/FBXO7/KNDC1/NUMB/TMEM106B/APOE/ACAP3/ARSB	64
GO:0007264	small GTPase mediated signal transduction	42/998	262/16374	7.70804e-09	1.61098e-05	1.43978e-05	ARHGEF4/ARHGAP24/ARHGAP26/DOCK5/RERG/DLC1/BCAR3/DOCK4/ITSN1/RIN2/RGL3/FGD4/DOCK9/ARHGEF26/ARHGAP32/RAP1GAP2/STARD13/RHOU/BCR/MMD2/ARHGEF12/RHOB/ABR/ARHGAP29/PREX1/TIAM1/ADCYAP1R1/VAV3/ARHGAP31/TGFB2/KALRN/ITPKB/CGNL1/AMOT/RHOBTB2/RHOT1/MYO9A/TNK2/RALGPS1/KNDC1/PPP2CB/HACD3	42
GO:0048813	dendrite morphogenesis	21/998	93/16374	1.36603e-07	0.000190333	0.000170106	PREX2/CTNNA2/EPHA4/CTNND2/EPHB1/LRP4/TNIK/ABI1/TRAK1/NSMF/CAMK2A/NFATC4/MINK1/SEMA4D/FARP1/SDC2/GRIN1/KLF7/CDKL5/KNDC1/TMEM106B	21
GO:0043547	positive regulation of GTPase activity	42/998	298/16374	3.19235e-07	0.000283395	0.000253279	ARHGAP24/RANBP3L/ARHGAP26/STXBP5/PREX2/RAPGEF3/ARRB1/DLC1/PLCB1/ALDH1A1/DOCK4/RIN2/RGL3/PLXNB1/DOCK9/RGS11/ARHGAP32/RAP1GAP2/STARD13/GNAQ/BCR/ARHGEF12/BCAS3/ABR/ARHGAP29/PREX1/AGFG2/NRP1/SEMA4D/VAV3/ARHGAP31/KALRN/RIN3/ERRFI1/RAB11FIP2/RGS7/MYO9A/GIT1/CDKL5/ACAP3/HACD3/STXBP5L	42
GO:0007266	Rho protein signal transduction	28/998	159/16374	3.3899e-07	0.000283395	0.000253279	ARHGEF4/PREX2/ARRB1/DLC1/ADRA1A/ITSN1/KANK1/FGD6/FGD4/RIPOR2/ARHGEF26/BCR/PDGFRB/ARHGEF12/RHOB/ABR/ARHGAP29/PREX1/TIAM1/NRP1/VAV3/KALRN/FARP1/KCTD13/ADGRG1/APOE/MCF2L2/HACD3	28
GO:0051056	regulation of small GTPase mediated signal transduction	25/998	143/16374	1.63889e-06	0.00113254	0.00101219	ARHGEF4/ARHGAP24/ARHGAP26/DLC1/ITSN1/FGD4/ARHGEF26/ARHGAP32/RAP1GAP2/STARD13/RHOU/BCR/ARHGEF12/RHOB/ABR/ARHGAP29/PREX1/TIAM1/VAV3/ARHGAP31/KALRN/AMOT/RHOBTB2/RHOT1/MYO9A	25
GO:0048667	cell morphogenesis involved in neuron differentiation	21/998	108/16374	1.8966e-06	0.00113254	0.00101219	PREX2/PARD3/BCL2/CTNNA2/SLC1A3/LRP4/RIPOR2/ABI1/TRAK1/FGFR2/S100B/CAMK2A/SEMA4A/MINK1/SLC9A3R1/MEF2C/FARP1/KLF7/NTNG2/NUMB/TMEM106B	21
GO:0016358	dendrite development	19/998	104/16374	1.48601e-05	0.00776443	0.0069393	PREX2/CTNNA2/KIAA0319/ALK/EPHB1/LRP4/ABI1/TRAK1/CAMK2A/COBL/CAMK1D/MINK1/PREX1/FARP1/KLF7/NCK2/CDKL5/KNDC1/TMEM106B	19
GO:0048812	neuron projection morphogenesis	44/998	373/16374	2.00254e-05	0.0093007	0.00831231	DNM3/UNC5C/EFNA5/LGI1/FLRT2/NTRK2/GJA1/SEMA3B/EPHA4/CAMK2B/CTNND2/EPHB1/LRP4/NEO1/PLXNB1/GFRA1/GPM6A/TNIK/TRAK1/NIN/NSMF/GLI3/SPTBN1/NFATC4/PRKCA/PDLIM5/METRN/TIAM1/BOC/NRP1/DPYSL2/SEMA4D/KALRN/SDC2/PIK3R1/GRIN1/KLF7/GPC1/SPTAN1/MYO9A/CDKL5/EEF2K/NLGN3/KNDC1	44
GO:0030334	regulation of cell migration	14/998	64/16374	2.42819e-05	0.0101498	0.00907122	ERBB4/UNC5C/PLXNA2/FRMD5/LAMA1/SERPINE2/SGK1/MACF1/MINK1/RHOB/SGK3/PRKX/AMOT/LAMA4	14
GO:0007268	chemical synaptic transmission	38/998	309/16374	2.90848e-05	0.0110522	0.00987768	ATP1A2/SLC1A2/CACNB2/LGI1/GLUL/PDE7B/ADRA1A/SLC1A3/DTNA/EPHB1/KCNQ3/CACNA1B/NRG3/CPNE6/SERPINE2/MBP/GRIA2/PLP1/BCR/TSPOAP1/SLC6A1/GRM3/SNCG/MINK1/PMP22/ABR/PPFIA1/MEF2C/PLCL1/EIF4EBP2/IQSEC2/NTNG2/CDH11/NLGN3/KCTD13/PCDH17/AKAP9/AKAP7	38
GO:0045926	negative regulation of growth	7/998	17/16374	3.46444e-05	0.0114016	0.0101899	MT1X/MT1G/MT1M/MT1E/MT1F/MT2A/HIF1A	7
GO:0008360	regulation of cell shape	20/998	120/16374	3.6126e-05	0.0114016	0.0101899	MKLN1/FAM171A1/DLC1/PLXNB1/FGD6/FGD4/S100A13/S100B/RHOU/CDC42EP4/PALM/SEMA4A/MYH14/VEGFA/SEMA4D/SLC9A3R1/ITGA7/GAS2/WASF3/PARVA	20
GO:0050804	modulation of chemical synaptic transmission	11/998	43/16374	3.8583e-05	0.0114016	0.0101899	EPHB1/CACNA1B/NRG3/BCR/ABR/EIF4EBP2/IQSEC2/NTNG2/CDH11/NLGN3/AKAP7	11
GO:0007265	Ras protein signal transduction	32/998	246/16374	4.09147e-05	0.0114016	0.0101899	ARHGEF4/PREX2/ARRB1/DLC1/ADRA1A/ITSN1/KANK1/MRAS/FGD6/FGD4/RIPOR2/ARHGEF26/BCR/PDGFRB/FGF2/MMD2/ARHGEF12/ABR/RALGDS/PREX1/TIAM1/VAV3/TGFB2/KALRN/ITPKB/FARP1/MAPK11/KCTD13/SSX2IP/ADGRG1/MCF2L2/PPP2CB	32
GO:0051402	neuron apoptotic process	29/998	214/16374	4.37353e-05	0.0114258	0.0102116	EGLN3/NTRK2/ARRB1/BCL2/ITSN1/NSMF/NFATC4/WFS1/TYRO3/CPEB4/MT3/NRBP2/PRNP/NRP1/FAM162A/FAIM2/USP53/TGFB2/MEF2C/BNIP3/ATN1/GAPDH/FOXO3/OXR1/GRIN1/GCLC/CNTFR/AXL/PPARGC1A	29
GO:0035023	regulation of Rho protein signal transduction	16/998	85/16374	4.72655e-05	0.0116217	0.0103867	ARHGEF4/PREX2/ITSN1/KANK1/FGD6/FGD4/ARHGEF26/BCR/ARHGEF12/ABR/PREX1/TIAM1/VAV3/KALRN/FARP1/MCF2L2	16
GO:0007399	nervous system development	52/998	488/16374	6.02595e-05	0.0139385	0.0124572	DNM3/ERBB4/EFNA5/ARHGAP26/LGI1/LSAMP/JARID2/CAMK2G/CSGALNACT1/EPHB1/GPM6A/PLXNA2/MAL/CPNE6/FGFR2/MBP/SPOCK1/S100B/SSBP3/FGF2/ZBTB16/FBXL17/FUT10/PALM/CRB2/PMP22/PRDM16/VEGFA/NRP1/DPYSL2/CYP46A1/EDNRB/KALRN/MEF2C/FARP1/ATN1/PDGFC/FUT9/NDP/TMOD2/CHRDL1/HES5/NRG2/CRIM1/ITPK1/ZNF423/CNTFR/PURA/NLGN3/VXN/ITM2B/ARSB	52
GO:0070997	neuron death	36/998	297/16374	6.33568e-05	0.0139385	0.0124572	MAP3K5/EGLN3/NTRK2/ARRB1/BCL2/ITSN1/EPHB1/DDIT4/NSMF/NFATC4/WFS1/TYRO3/SORL1/CPEB4/MT3/NRBP2/PRNP/NRP1/FAIM2/TGFB2/MEF2C/ATG7/CAPN2/PPP1R13B/FOXO3/OXR1/GRIN1/TP53BP2/GCLC/PPARA/CNTFR/FBXO7/AXL/EGLN1/APOE/PPARGC1A	36
GO:0071456	cellular response to hypoxia	26/998	187/16374	6.92069e-05	0.0140124	0.0125233	RORA/HIF3A/EGLN3/AQP1/STOX1/BCL2/NDRG1/FMN2/S100B/RGCC/HILPDA/PSMA1/MT3/DDAH1/CPEB2/VEGFA/FAM162A/VASN/HIF1A/BNIP3/FOXO3/EPAS1/PGK1/BNIP3L/EGLN1/PPARGC1A	26
GO:0007409	axonogenesis	35/998	288/16374	7.55818e-05	0.0140124	0.0125233	UNC5C/EFNA5/LGI1/FLRT2/PARD3/NTRK2/BCL2/CTNNA2/SEMA3B/EPHA4/EPHB1/LRP4/NEO1/GFRA1/TRAK1/NIN/FGFR2/S100B/GLI3/SPTBN1/PRKCA/SEMA4A/METRN/TIAM1/BOC/NRP1/DPYSL2/PIK3R1/GRIN1/KLF7/GPC1/NTNG2/SPTAN1/NLGN3/NUMB	35
GO:0000904	cell morphogenesis involved in differentiation	24/998	167/16374	7.66127e-05	0.0140124	0.0125233	EFNA5/DOCK5/PREX2/PARD3/BCL2/CTNNA2/LRP4/KANK1/ABI1/TRAK1/FGFR2/S100B/FBLN1/CAMK2A/SEMA4A/MINK1/PREX1/NRP1/MEF2C/FARP1/KLF7/NTNG2/NUMB/TMEM106B	24
GO:0098916	anterograde trans-synaptic signaling	18/998	107/16374	7.71017e-05	0.0140124	0.0125233	CACNB2/LGI1/SLC1A3/EPHB1/CACNA1B/NRG3/BCR/TSPOAP1/ABR/PPFIA1/EIF4EBP2/IQSEC2/NTNG2/CDH11/NLGN3/KCTD13/PCDH17/AKAP7	18
GO:0048870	cell motility	46/998	427/16374	0.00012248	0.0202776	0.0181227	ERBB4/UNC5C/DLC1/BCL2/MYLK/MAGI2/FAM107A/KANK1/PLXNA2/LDLRAD4/FRMD5/VSIR/LAMA1/SERPINE2/DST/CTSH/FBLN1/PDGFRB/PRKCA/SGK1/MACF1/SUN2/MINK1/RHOB/ZNF703/PREX1/TIAM1/VEGFA/NTRK3/SGK3/SEMA4D/PRKX/SLC9A3R1/MITF/AMOT/ITGAV/FOXO3/PIK3R1/NRG2/ITGB4/ABHD2/LAMA4/SSX2IP/TCAF1/SMAD3/NUMB	46
GO:0071383	cellular response to steroid hormone stimulus	13/998	65/16374	0.000125517	0.0202776	0.0181227	ATP1A2/RORA/RORB/THRB/NR6A1/NR1D1/NR1D2/RARB/ABHD2/PPARA/RXRA/THRA/NPC1	13
GO:0001764	neuron migration	21/998	141/16374	0.000126129	0.0202776	0.0181227	ERBB4/FLRT2/NTRK2/GJA1/CTNNA2/KIAA0319/CAMK2B/GPM6A/DDIT4/NRG3/SPOCK1/NSMF/CAMK2A/NRP1/NTRK3/MEF2C/CDKL5/AXL/ADGRG1/ACAP3/FZD3	21
GO:0060038	cardiac muscle cell proliferation	11/998	50/16374	0.000169267	0.026205	0.0234202	ERBB4/GJA1/JARID2/FGFR2/TGFBR3/FGF2/TGFB2/MEF2C/NDRG4/MAPK11/RXRA	11
GO:0061621	canonical glycolysis	8/998	28/16374	0.000192323	0.028711	0.0256599	PFKP/PFKL/ENO1/PKM/GAPDH/PGK1/TPI1/GPI	8
GO:0008219	cell death	31/998	256/16374	0.000203072	0.028976	0.0258967	MAP3K5/MT-CO2/BRINP1/BCL2/CST3/EPHB1/DDIT4/SGCD/WFS1/FGF2/SORL1/TTPA/MT3/SYCP2L/PMP22/PRNP/ADCYAP1R1/NTRK3/TGFB2/BNIP3/CAPN2/PPP1R13B/NOL3/EMP1/TP53BP2/PPARA/BNIP3L/EGLN1/APOE/NPC1/PPARGC1A	31
GO:0021885	forebrain cell migration	3/998	3/16374	0.000225788	0.028976	0.0258967	TYRO3/EMX2/AXL	3
GO:0051250	negative regulation of lymphocyte activation	3/998	3/16374	0.000225788	0.028976	0.0258967	MERTK/TYRO3/AXL	3
GO:0060313	negative regulation of blood vessel remodeling	3/998	3/16374	0.000225788	0.028976	0.0258967	CST3/BCR/ABR	3
GO:0043542	endothelial cell migration	21/998	147/16374	0.000228758	0.028976	0.0258967	GLUL/SASH1/STARD13/RGCC/FGF2/PRKCA/AKT3/SEMA4A/FAP/BCAS3/RHOB/AGT/VEGFA/NRP1/HIF1A/PRKX/MEF2C/BMPER/SCARB1/GPI/APOE	21
GO:1903672	positive regulation of sprouting angiogenesis	6/998	16/16374	0.000238099	0.0292722	0.0261614	S100A1/FGF2/VEGFA/PKM/BMPER/JAK1	6
GO:0007010	cytoskeleton organization	33/998	284/16374	0.000278627	0.033276	0.0297397	EFNA5/ABLIM1/DLC1/BCL2/CTNNA2/PLXNB1/ANK2/FAM107A/FMNL2/TNIK/FGD6/FGD4/SOX9/HIP1R/RHOU/DST/SPTBN1/PDGFRB/PALM/BCAS3/GAN/DPYSL2/PHLDB1/CGNL1/CAPN2/NCK2/SPTAN1/WASF3/SORBS3/INPPL1/ELMO2/IQCJ-SCHIP1/APOE	33
GO:2000378	negative regulation of reactive oxygen species metabolic process	7/998	23/16374	0.000316208	0.0367152	0.0328135	BCL2/PLIN5/BCR/MT3/HIF1A/BNIP3/SIRT5	7
GO:0030073	insulin secretion	25/998	195/16374	0.000342982	0.0374136	0.0334377	EFNA5/GLUL/RAPGEF3/GJA1/ARRB1/CAMK2G/SREBF1/ENHO/GLUD1/CD38/TCF7L2/SYTL4/PFKL/PRKCA/ADCY8/SLC2A1/SYT9/TIAM1/NR1D1/HIF1A/ENSA/KLF7/HMGN3/PFKFB2/STXBP5L	25
GO:0001666	response to hypoxia	28/998	229/16374	0.000345003	0.0374136	0.0334377	HIF3A/MT-ND4/MT-CYB/EGLN3/STOX1/CST3/MT-ND5/DDIT4/CD38/TGFBR3/KCNMA1/PSMA1/MT3/SLC2A1/DDAH1/VEGFA/PLOD2/HIF1A/TGFB2/PKM/BNIP3/CAPN2/NOL3/EPAS1/RYR1/PPARA/SMAD3/EGLN1	28
GO:0048814	regulation of dendrite morphogenesis	6/998	17/16374	0.000349075	0.0374136	0.0334377	TNIK/NSMF/SEMA4D/SDC2/GRIN1/KNDC1	6
GO:0001525	angiogenesis	44/998	425/16374	0.000407967	0.040963	0.0366098	ARHGAP24/RORA/HIF3A/GLUL/RAPGEF3/PDE3B/AQP1/SASH1/EPHB1/FGFR2/S100A1/RGCC/CTSH/PDGFRB/RAMP1/NFATC4/FGF2/PRKCA/SEMA4A/FAP/BCAS3/RHOB/AGT/DDAH1/VEGFA/NRP1/THSD7A/ITGB8/VAV3/HIF1A/PRKX/TGFB2/PKM/AMOT/ADAM12/ITGAV/EPAS1/PGK1/LEPR/BMPER/EGLN1/ADGRG1/JAK1/THBS4	44
GO:0001678	cellular glucose homeostasis	7/998	24/16374	0.000423102	0.040963	0.0366098	FOXO1/ADCY8/PIK3R1/KLF15/RAB11FIP2/NUCKS1/PPARGC1A	7
GO:0048545	response to steroid hormone	12/998	64/16374	0.000424798	0.040963	0.0366098	RORA/RORB/THRB/NR6A1/NR1D1/NR1D2/RARB/ABHD2/PPARA/ABCA2/RXRA/THRA	12
GO:0007417	central nervous system development	37/998	339/16374	0.000425289	0.040963	0.0366098	ERBB4/UNC5C/GRIN2C/NTRK2/JARID2/CST3/SEPT4/ITSN1/MACROD2/ZIC1/DDIT4/MAL/MBP/SPOCK1/ZIC2/S100B/GLI3/BCR/RIDA/ZBTB16/ACSL3/MT3/ABR/BAG3/DPYSL2/PTCH1/BNIP3/ATN1/PDGFC/SLC17A7/AK4/GRIN1/HES5/SLC6A11/NLGN3/ADGRG1/ARSB	37
GO:0048514	blood vessel morphogenesis	32/998	279/16374	0.000431189	0.040963	0.0366098	ARHGAP24/RORA/HIF3A/GLUL/RAPGEF3/PDE3B/NTRK2/GJA1/EPHB1/FGFR2/TGFBR3/RAMP1/PRKCA/AKT3/SEMA4A/FAP/BCAS3/RHOB/VEGFA/NRP1/THSD7A/ITGB8/VAV3/HIF1A/PRKX/TGFB2/AMOT/ITGAV/EPAS1/LEPR/HDAC7/ADGRG1	32
GO:0048708	astrocyte differentiation	10/998	47/16374	0.000443004	0.0411502	0.0367771	GPR37L1/EPHA4/SOX9/SERPINE2/S100B/PLP1/MT3/NTRK3/HES5/IL6ST	10
GO:0071474	cellular hyperosmotic response	5/998	12/16374	0.000459762	0.0417784	0.0373386	MAPK10/AQP1/EFHD1/SLC2A1/ERRFI1	5
GO:0043524	negative regulation of neuron apoptotic process	19/998	134/16374	0.000490921	0.0436607	0.0390208	NTRK2/ARRB1/BCL2/ITSN1/NFATC4/WFS1/TYRO3/CPEB4/MT3/NRBP2/NRP1/FAIM2/MEF2C/OXR1/GRIN1/GCLC/CNTFR/AXL/PPARGC1A	19
GO:0001974	blood vessel remodeling	9/998	40/16374	0.000550392	0.0473488	0.0423171	CST3/BCR/AGT/ABR/MEF2C/TMBIM1/NOL3/EPAS1/AXL	9
GO:0043401	steroid hormone mediated signaling pathway	11/998	57/16374	0.000565637	0.0473488	0.0423171	RORA/RORB/THRB/NR6A1/NR1D1/NR1D2/RARB/ABHD2/PPARA/RXRA/THRA	11
GO:0072593	reactive oxygen species metabolic process	18/998	125/16374	0.000566374	0.0473488	0.0423171	MT-ND2/BCL2/PLIN5/DDIT4/FOXO1/BCR/PDGFRB/MT3/AGT/ABCD2/PDK4/HIF1A/SLC25A33/BNIP3/SESN1/FOXO3/GRIN1/SIRT5	18
GO:0042493	response to drug	27/998	225/16374	0.000586431	0.0480643	0.0429565	MT-ND1/AQP1/ARRB1/ADRA1A/BCL2/BCAR3/CD38/UNC79/SLC15A2/ACACB/NCOA1/EMX2/ADIRF/VAV3/PTCH1/NFATC2/TGFB2/MYO6/MGST1/SLC22A5/CDK9/AK4/SLC6A11/PPARA/ABCA2/FZD3/NPC1	27
GO:0050808	synapse organization	23/998	180/16374	0.000609978	0.0488908	0.0436952	DNM3/SPARCL1/EFNA5/FLRT2/NTRK2/NDRG1/EPHA4/CAMK2B/CTNND2/EPHB1/LRP4/GPM6A/NFATC4/PDLIM5/SNCG/NRP1/NTRK3/MEF2C/GRIN1/NTNG2/EEF2K/NLGN3/PCDH17	23
GO:0048015	phosphatidylinositol-mediated signaling	19/998	137/16374	0.000648982	0.0488908	0.0436952	ERBB4/NTRK2/GSN/CA8/PLXNB1/SOX9/SERPINE2/PIP4K2A/PDGFRB/AGT/PRR5/NTRK3/SEMA4D/SLC9A3R1/TGFB2/PIP5K1B/PIK3R1/PIK3IP1/PLCH1	19
GO:0003091	renal water homeostasis	8/998	33/16374	0.000654664	0.0488908	0.0436952	ADCY2/AQP1/AQP4/WFS1/ADCY8/RAB11FIP2/ADCY3/ADCY9	8
GO:0007616	long-term memory	8/998	33/16374	0.000654664	0.0488908	0.0436952	CPEB3/NFATC4/SGK1/ADCY8/PRNP/SLC17A7/GRIN1/APOE	8
GO:0010631	epithelial cell migration	20/998	148/16374	0.000663654	0.0488908	0.0436952	DOCK5/GLUL/SASH1/SOX9/CTSH/PRKCA/MACF1/SEMA4A/BCAS3/RHOB/AGT/VEGFA/NRP1/HIF1A/TGFB2/BMPER/SCARB1/GPI/APOE/ARSB	20
GO:0045663	positive regulation of myoblast differentiation	6/998	19/16374	0.000688834	0.0488908	0.0436952	RANBP3L/MAP3K5/PLCB1/RIPOR2/BOC/MEF2C	6
GO:0071294	cellular response to zinc ion	6/998	19/16374	0.000688834	0.0488908	0.0436952	MT1X/MT1G/MT1M/MT1E/MT1F/MT2A	6
GO:0050673	epithelial cell proliferation	31/998	275/16374	0.000705358	0.0488908	0.0436952	GLUL/GJA1/STOX1/EYA1/HTRA1/SOX9/TCF7L2/FGFR2/TGFBR3/RGCC/RIDA/FGF2/PRKCA/AKT3/KLF9/ZNF703/VEGFA/NRP1/NR1D1/PTCH1/HIF1A/TGFB2/EDNRB/CD109/ERRFI1/HES5/PURA/PEX2/SMAD3/APOE/THBS4	31
GO:0010666	positive regulation of cardiac muscle cell apoptotic process	5/998	13/16374	0.000709747	0.0488908	0.0436952	MAP3K5/CAMK2A/AGT/BNIP3/CAPN2	5
GO:0006094	gluconeogenesis	13/998	77/16374	0.000713478	0.0488908	0.0436952	FOXO1/ENO1/SDS/PGM1/GAPDH/PGK1/PPARA/LEPR/TPI1/GPD2/PC/GPI/PPARGC1A	13
GO:0003300	cardiac muscle hypertrophy	10/998	50/16374	0.000744438	0.0501895	0.0448558	ADRA1A/JARID2/FOXO1/PRKCA/AGT/TIAM1/ERRFI1/CDK9/IL6ST/SMAD3	10
GO:0032526	response to retinoic acid	9/998	42/16374	0.000804316	0.0527301	0.0471265	GJA1/SREBF1/CD38/CTSH/PDGFRB/NCOA1/PTCH1/RXRA/GDAP1	9
GO:0072659	protein localization to plasma membrane	24/998	195/16374	0.000807352	0.0527301	0.0471265	CACNB2/MAP7/EFR3B/ANK2/TNIK/BSG/SPTBN1/RAMP1/PALM/PTCH1/PPFIA1/SLC9A3R1/EFR3A/TMBIM1/PTPN9/KCNIP4/CD81/PIK3R1/DPP10/RAB11FIP2/RAB34/PPP2R5A/TTC7A/NUMB	24
GO:0032909	regulation of transforming growth factor beta2 production	3/998	4/16374	0.000861982	0.0554321	0.0495413	HIF1A/TGFB2/SMAD3	3
GO:0050806	positive regulation of synaptic transmission	10/998	51/16374	0.000876233	0.0554625	0.0495685	LGI1/EPHA4/SLC1A3/FAM107A/ADCY8/PRNP/CYP46A1/NLGN3/KCTD13/APOE	10
GO:0046847	filopodium assembly	11/998	60/16374	0.000888993	0.0554625	0.0495685	DNM3/ARHGEF4/TENM2/TTYH1/GPM6A/FGD6/FGD4/RIPOR2/PALM/BCAS3/NRP1	11
GO:0051924	regulation of calcium ion transport	7/998	27/16374	0.000924569	0.0565634	0.0505523	GJA1/BCL2/CAMK2G/CAMK2B/ANK2/CACNA1B/AGT	7
GO:0045321	leukocyte activation	6/998	20/16374	0.000933701	0.0565634	0.0505523	MERTK/EPHB1/TYRO3/CD81/NCK2/AXL	6
GO:0021762	substantia nigra development	9/998	43/16374	0.000963021	0.0575061	0.0513949	CKB/NDRG2/PADI2/GLUD1/S100A1/MBP/PLP1/CALM1/DYNLL1	9
GO:0030036	actin cytoskeleton organization	27/998	233/16374	0.00100263	0.0590281	0.0527551	EFNA5/ARHGAP26/RAPGEF3/GSN/DLC1/TESK2/BCL2/FAM107A/KANK1/MRAS/FGD6/FGD4/HIP1R/BCR/PDGFRB/ABLIM3/DAAM2/BCAS3/ABR/NRP1/NTRK3/SLC9A3R1/CGNL1/AMOT/NCK2/SORBS3/INPPL1	27
GO:0048168	regulation of neuronal synaptic plasticity	5/998	14/16374	0.00104892	0.0608956	0.0544242	NSMF/S100B/CAMK2A/NCDN/APOE	5
GO:0007420	brain development	32/998	295/16374	0.00111922	0.0640867	0.0572762	UNC5C/GRIN2C/DLC1/CTNNA2/CST3/SEPT4/ITSN1/MACROD2/ZIC1/DDIT4/BBS2/FGFR2/ZIC2/BCR/RIDA/ACSL3/AKT3/MT3/ABR/BAG3/DPYSL2/PTCH1/WLS/ARID1A/SLC17A7/AK4/FOXO3/GRIN1/HES5/SLC6A11/ADGRG1/PPARGC1A	32
GO:0051649	establishment of localization in cell	27/998	235/16374	0.00114007	0.0643988	0.0575551	DNM3/EFNA5/ARRB1/WWC1/ADRA1A/BCL2/ITSN1/CAMK2A/ADCY8/SNCG/CADPS2/SYT9/TIAM1/ADCYAP1R1/NR1D1/HIF1A/MEF2C/SLC17A7/NUMA1/GRIN1/RHOT1/KLF7/HMGN3/GIT1/ERC2/SYT11/STXBP5L	27
GO:0014065	phosphatidylinositol 3-kinase signaling	18/998	133/16374	0.00118675	0.0661417	0.0591127	ERBB4/PREX2/NTRK2/PLXNB1/SOX9/SERPINE2/PIP4K2A/PDGFRB/TYRO3/AGT/PRR5/NTRK3/SEMA4D/SLC9A3R1/TGFB2/PIP5K1B/PIK3R1/PIK3IP1	18
GO:0018108	peptidyl-tyrosine phosphorylation	30/998	272/16374	0.00121138	0.0666258	0.0595454	ERBB4/EPHA6/EFNA5/CNTN1/NTRK2/FGFR3/TESK2/MERTK/ALK/EPHA4/EPHB1/LRP4/ABI1/FGFR2/PDGFRB/TYRO3/AGT/PRNP/VEGFA/NRP1/NTRK3/SEMA4D/PDGFC/CD81/HES5/IL6ST/TNK2/AXL/JAK1/THBS4	30
GO:0090050	positive regulation of cell migration involved in sprouting angiogenesis	6/998	21/16374	0.00124039	0.0668062	0.0597066	FGF2/AKT3/VEGFA/NRP1/MAP3K3/HDAC7	6
GO:0016055	Wnt signaling pathway	41/998	410/16374	0.00124662	0.0668062	0.0597066	WWOX/NDRG2/LGR4/APCDD1/ZNRF3/DKK3/WIF1/AMER2/CTNND2/LRP4/KANK1/TNIK/RBMS3/RNF43/SOX9/RNF220/TCF7L2/APC2/CPE/FGFR2/FOXO1/GLI3/GPRC5B/GNAQ/NFATC4/KREMEN1/NFATC1/MACF1/DAAM2/PSMA1/ZNF703/TIAM1/SLC9A3R1/WLS/FOXO3/WNK2/CSNK1E/TMEM170B/SMAD3/CTNNBIP1/APOE	41
GO:0022610	biological adhesion	17/998	123/16374	0.00127037	0.0672171	0.0600739	PDE3B/GSN/PLXNB1/ZFHX3/RIPOR2/FRMD5/SOX9/LAMA1/FBLN1/PRKCA/VEGFA/SEMA4D/VAV3/PRKX/ITGAV/LAMA4/ADGRG1	17
GO:0071600	otic vesicle morphogenesis	4/998	9/16374	0.00134944	0.0705082	0.0630153	STOX1/EYA1/SOX9/FGFR2	4
GO:0008366	axon ensheathment	10/998	54/16374	0.00139069	0.0717666	0.0641399	LGI4/PARD3/MBP/S100B/PLP1/ABCD2/RARB/HES5/GPC1/WASF3	10
GO:0008016	regulation of heart contraction	13/998	83/16374	0.00146587	0.0738269	0.0659813	ATP1A2/ASPH/RYR3/FXYD1/THRB/ATP1B2/CACNA1B/CYP2J2/S100A1/AGT/RYR1/TRPC1/THRA	13
GO:0010658	striated muscle cell apoptotic process	8/998	37/16374	0.00146594	0.0738269	0.0659813	MAP3K5/CAMK2A/AGT/BAG3/BNIP3/CAPN2/NOL3/SIRT5	8
GO:0060997	dendritic spine morphogenesis	10/998	55/16374	0.0016086	0.0795918	0.0711335	DNM3/EPHA4/CAMK2B/CTNND2/EPHB1/PDLIM5/TIAM1/KALRN/EEF2K/NLGN3	10
GO:0030318	melanocyte differentiation	6/998	22/16374	0.00161849	0.0795918	0.0711335	BCL2/LRMDA/GLI3/EDNRB/MEF2C/MITF	6
GO:0043065	positive regulation of apoptotic process	33/998	315/16374	0.00169221	0.0817054	0.0730225	ARHGEF4/UNC5C/MAP3K5/RPS6KA2/SEPT4/ITSN1/TXNIP/FGD4/ARHGEF26/FOXO1/HIP1R/S100B/KCNMA1/PDGFRB/ZBTB16/NCOA1/ARHGEF12/CAMK1D/RHOB/ABR/PREX1/TIAM1/FAM162A/NTRK3/VAV3/KALRN/BNIP3/ATG7/FOXO3/RARB/GRIN1/CRADD/BNIP3L	33
GO:0048511	rhythmic process	15/998	105/16374	0.00171654	0.0817054	0.0730225	RORA/MAPK10/RORB/HLF/TEF/BHLHE40/NR1D1/PER1/ATG7/NR1D2/PPARA/DDX5/CSNK1E/CRY2/PPARGC1A	15
GO:0060322	head development	25/998	218/16374	0.00175082	0.0817054	0.0730225	UNC5C/GRIN2C/CST3/SEPT4/ITSN1/MACROD2/ZIC1/DDIT4/ZIC2/BCR/RIDA/SSBP3/ACSL3/MT3/ABR/BAG3/DPYSL2/PTCH1/LIMK2/SLC17A7/AK4/GRIN1/HES5/SLC6A11/ADGRG1	25
GO:0042752	regulation of circadian rhythm	11/998	65/16374	0.00175884	0.0817054	0.0730225	MAPK10/RORB/BHLHE40/NR1D1/PER1/ATG7/NR1D2/PPARA/CSNK1E/CRY2/PPARGC1A	11
GO:0099173	postsynapse organization	8/998	38/16374	0.00175921	0.0817054	0.0730225	DNM3/NDRG1/LRP4/NRP1/NTNG2/CDKL5/NLGN3/EGLN1	8
GO:0043534	blood vessel endothelial cell migration	14/998	95/16374	0.00178882	0.0820598	0.0733393	STARD13/RGCC/FGF2/PRKCA/AKT3/VEGFA/NRP1/HIF1A/MEF2C/AMOT/MAP3K3/HDAC7/SCARB1/APOE	14
GO:0051491	positive regulation of filopodium assembly	7/998	30/16374	0.0018061	0.0820598	0.0733393	DNM3/TENM2/GPM6A/RIPOR2/PALM/BCAS3/NRP1	7
GO:0043647	inositol phosphate metabolic process	10/998	56/16374	0.00185338	0.0833024	0.0744498	PLCB1/PTH1R/INPP4B/NUDT3/ADCYAP1R1/ITPKB/ITPK1/CALM1/PLCH1/INPPL1	10
GO:0048013	ephrin receptor signaling pathway	13/998	86/16374	0.00203841	0.087743	0.0784185	EPHA6/EFNA5/ITSN1/EPHA4/EPHB1/TIAM1/NTRK3/VAV3/KALRN/SDC2/GRIN1/NCK2/GIT1	13
GO:1901203	positive regulation of extracellular matrix assembly	3/998	5/16374	0.00205703	0.087743	0.0784185	SOX9/RGCC/SMAD3	3
GO:1904778	positive regulation of protein localization to cell cortex	3/998	5/16374	0.00205703	0.087743	0.0784185	NUMA1/EPB41L2/GPSM2	3
GO:2001014	regulation of skeletal muscle cell differentiation	3/998	5/16374	0.00205703	0.087743	0.0784185	DDX17/NR1D2/DDX5	3
GO:0001837	epithelial to mesenchymal transition	15/998	107/16374	0.00207679	0.087743	0.0784185	DDX17/LDLRAD4/SOX9/FGFR2/TGFBR3/RGCC/CRB2/ZNF703/TIAM1/VASN/HIF1A/TGFB2/PHLDB1/DDX5/SMAD3	15
GO:0097150	neuronal stem cell population maintenance	6/998	23/16374	0.00207812	0.087743	0.0784185	FOXO1/PRRX1/FUT10/FOXO3/HES5/MCPH1	6
GO:0097061	dendritic spine organization	10/998	57/16374	0.00212737	0.0889239	0.0794739	DNM3/EPHA4/CAMK2B/PDLIM5/PRNP/TIAM1/KALRN/EEF2K/NLGN3/APOE	10
GO:0071260	cellular response to mechanical stimulus	12/998	77/16374	0.00229757	0.0950876	0.0849826	ATP1A2/GJA1/AQP1/RIPOR2/SOX9/AGT/SLC2A1/BAG3/BNIP3/GCLC/CRADD/TMEM150C	12
GO:0048771	tissue remodeling	10/998	58/16374	0.00243303	0.0997064	0.0891105	GJA1/CST3/PTH1R/BCR/AGT/ABR/NCDN/TMBIM1/LEPR/THBS4	10
GO:0014855	striated muscle cell proliferation	8/998	40/16374	0.00248354	0.100788	0.0900773	ERBB4/GJA1/JARID2/FGFR2/TGFBR3/FGF2/MEF2C/MAPK11	8
GO:0002931	response to ischemia	9/998	49/16374	0.00252822	0.101615	0.0908164	MAP3K5/GJA1/BCL2/CAMK2A/CPEB4/FAIM2/NOL3/EEF2K/PPARGC1A	9
GO:0046777	protein autophosphorylation	23/998	201/16374	0.00269317	0.106466	0.0951514	ERBB4/NTRK2/FGFR3/ALK/EPHA4/CAMK2B/EPHB1/TNIK/FGFR2/BCR/PDGFRB/CAMK2A/TYRO3/DAPK1/MINK1/VEGFA/PRKX/ERRFI1/MAP3K3/CDKL5/EEF2K/WNK2/CALM1	23
GO:0106106	cold-induced thermogenesis	18/998	143/16374	0.00269984	0.106466	0.0951514	ACOT11/LGR4/GJA1/LPIN1/ALDH1A1/PCTP/PRDM16/VEGFA/NR1D1/PLCL1/PDGFC/EPAS1/ZNF423/LEPR/LAMA4/THRA/KDM3A/PPARGC1A	18
GO:0001658	branching involved in ureteric bud morphogenesis	10/998	59/16374	0.00277292	0.106675	0.0953385	LGR4/BCL2/EYA1/SOX9/GLI3/FGF2/AGT/VEGFA/PTCH1/CTNNBIP1	10
GO:0060996	dendritic spine development	10/998	59/16374	0.00277292	0.106675	0.0953385	CPEB3/ITSN1/CAMK2B/CTNND2/EPHB1/CAMK2A/MEF2C/NCK2/CDKL5/APOE	10
GO:0030279	negative regulation of ossification	5/998	17/16374	0.00278171	0.106675	0.0953385	BCL2/LRP4/SOX9/KREMEN1/MEF2C	5
GO:0070838	divalent metal ion transport	11/998	69/16374	0.00287157	0.10912	0.0975236	CACNB2/GJA1/BCL2/CAMK2G/CAMK2B/MYLK/ANK2/CACNA1B/CAMK2A/WFS1/AGT	11
GO:0060548	negative regulation of cell death	9/998	50/16374	0.00291979	0.109952	0.0982676	CST3/FGF2/TTPA/SYCP2L/ADCYAP1R1/NTRK3/BNIP3/BNIP3L/NPC1	9
GO:0010977	negative regulation of neuron projection development	10/998	60/16374	0.0031497	0.114406	0.102248	EPHA4/KANK1/CD38/RAP1GAP2/SPOCK1/MT3/PMP22/ITM2C/PTPN9/APOE	10
GO:0034220	ion transmembrane transport	29/998	277/16374	0.00315608	0.114406	0.102248	ATP1A2/ASPH/RYR3/TTYH1/CACNA2D3/GJA1/FXYD1/SFXN5/ATP13A4/TPCN1/ATP1B2/KCNQ3/NALCN/CACNA1B/UNC79/GRID1/GRIA2/KCNMA1/KCNA2/ATP13A5/KCNJ10/SGK1/ANO5/SGK3/KCND3/SLC9A3R1/RYR1/ANO8/AKAP9	29
GO:0042692	muscle cell differentiation	12/998	80/16374	0.00318715	0.114406	0.102248	RORA/SYNE1/CTNNA2/OLFM2/FGFR2/NFATC4/MEGF10/BOC/MEF2C/CDK9/PIAS1/MAPK11	12
GO:0070977	bone maturation	4/998	11/16374	0.00320305	0.114406	0.102248	FGFR3/PLXNB1/SEMA4D/RYR1	4
GO:0071679	commissural neuron axon guidance	4/998	11/16374	0.00320305	0.114406	0.102248	VEGFA/NRP1/PTCH1/FZD3	4
GO:1904322	cellular response to forskolin	4/998	11/16374	0.00320305	0.114406	0.102248	EFNA5/ADCY2/ADCY8/ADCY3	4
GO:0048844	artery morphogenesis	7/998	33/16374	0.00323122	0.114406	0.102248	MYLK/PRRX1/AKT3/VEGFA/NRP1/TGFB2/APOE	7
GO:0044237	cellular metabolic process	16/998	123/16374	0.0032606	0.114406	0.102248	BCL2/PLIN5/FOXO1/ACACB/BCR/PDGFRB/CTIF/MT3/AGT/PDK4/HIF1A/EIF3E/BNIP3/EIF4EBP2/FASN/SIRT5	16
GO:0006027	glycosaminoglycan catabolic process	6/998	25/16374	0.00328437	0.114406	0.102248	HPSE2/SDC4/GPC5/IDS/SDC2/GPC1	6
GO:0010595	positive regulation of endothelial cell migration	9/998	51/16374	0.00335769	0.115993	0.103666	SASH1/PRKCA/BCAS3/RHOB/AGT/VEGFA/NRP1/SCARB1/GPI	9
GO:0030901	midbrain development	12/998	81/16374	0.00353901	0.120213	0.107438	CKB/NDRG2/PADI2/GLUD1/FGFR2/S100A1/MBP/PLP1/WLS/CALM1/DYNLL1/FZD3	12
GO:0048041	focal adhesion assembly	12/998	81/16374	0.00353901	0.120213	0.107438	EFNA5/SDC4/DLC1/TESK2/BCL2/FAM107A/COL16A1/MACF1/BCAS3/VEGFA/NRP1/SMAD3	12
GO:0032922	circadian regulation of gene expression	10/998	61/16374	0.00356613	0.120213	0.107438	RORA/LGR4/ZFHX3/BHLHE40/NR1D1/PER1/PPARA/CSNK1E/CRY2/PPARGC1A	10
GO:0003151	outflow tract morphogenesis	11/998	71/16374	0.00360951	0.120702	0.107875	EYA1/FGFR2/TGFBR3/VEGFA/NRP1/HIF1A/TGFB2/MEF2C/RARB/RYR1/PARVA	11
GO:0043149	stress fiber assembly	13/998	92/16374	0.00373753	0.121614	0.10869	SDC4/RAPGEF3/FAM171A1/ARRB1/DLC1/RGCC/CD47/NRP1/PPFIA1/PIK3R1/SORBS3/KCTD13/SMAD3	13
GO:0120036	plasma membrane bounded cell projection organization	25/998	231/16374	0.0038207	0.121614	0.10869	SLC39A12/CNTN1/NTRK2/GJA1/CTNNA2/EPHA4/CAMK2B/MAGI2/PLXNB1/KANK1/GPM6A/CD38/RAP1GAP2/SPOCK1/CAMK1D/MT3/AGT/PMP22/NDRG4/ITM2C/PTPN9/FBXO7/APOE/ACAP3/ARSB	25
GO:0010940	positive regulation of necrotic cell death	3/998	6/16374	0.00392771	0.121614	0.10869	MT-CO2/MT3/BNIP3	3
GO:0021631	optic nerve morphogenesis	3/998	6/16374	0.00392771	0.121614	0.10869	EPHB1/KCNA2/GLI3	3
GO:0021957	corticospinal tract morphogenesis	3/998	6/16374	0.00392771	0.121614	0.10869	EPHA4/NIN/CDH11	3
GO:0032675	regulation of interleukin-6 production	3/998	6/16374	0.00392771	0.121614	0.10869	SIRPA/CD47/CAPN2	3
GO:0042426	choline catabolic process	3/998	6/16374	0.00392771	0.121614	0.10869	ALDH7A1/DMGDH/CHDH	3
GO:0051597	response to methylmercury	3/998	6/16374	0.00392771	0.121614	0.10869	ANK2/S100B/ARSB	3
GO:1901018	positive regulation of potassium ion transmembrane transporter activity	3/998	6/16374	0.00392771	0.121614	0.10869	ATP1B2/ANK2/AKAP9	3
GO:1903243	negative regulation of cardiac muscle hypertrophy in response to stress	3/998	6/16374	0.00392771	0.121614	0.10869	FOXO1/ERRFI1/SMAD3	3
GO:0000422	autophagy of mitochondrion	8/998	43/16374	0.00398463	0.12175	0.108811	SREBF1/CLEC16A/HIF1A/BNIP3/ATG7/BNIP3L/FBXO7/PPARGC1A	8
GO:0070371	ERK1 and ERK2 cascade	28/998	269/16374	0.00399036	0.12175	0.108811	ERBB4/NDRG2/ARRB1/FGFR3/ADRA1A/GAREM1/EPHB1/LMO3/SIRPA/SOX9/FGFR2/CTSH/FBLN1/PDGFRB/FGF2/PRKCA/MT3/AGT/TIAM1/NRP1/SLC9A3R1/ERRFI1/NDRG4/ITGAV/WNK2/BMPER/APOE/CAMK2N1	28
GO:0007623	circadian rhythm	16/998	126/16374	0.0041499	0.124839	0.111572	RORA/MAPK10/NTRK2/SREBF1/RORB/KLF9/BHLHE40/NTRK3/NR1D1/PER1/ATG7/NR1D2/PPARA/CSNK1E/CRY2/PPARGC1A	16
GO:0060070	canonical Wnt signaling pathway	30/998	295/16374	0.00415135	0.124839	0.111572	LGR4/ZNRF3/DKK3/AMER2/CTNND2/LRP4/KANK1/RBMS3/SOX9/RNF220/TCF7L2/APC2/FGFR2/FOXO1/GLI3/GPRC5B/GNAQ/KREMEN1/DAAM2/PSMA1/ZNF703/SLC9A3R1/WLS/FOXO3/WNK2/CSNK1E/TMEM170B/SMAD3/APOE/FZD3	30
GO:0022008	neurogenesis	31/998	309/16374	0.00441293	0.128337	0.114699	LGI4/NTRK2/BRINP1/GJA1/KIAA0319/EPHA4/EPHB1/GPM6A/DDIT4/SPOCK1/SORL1/EMX2/NRBP2/METRN/PRDM16/NRP1/NTRK3/TGFB2/MEF2C/ITM2C/DTX1/KLF15/HES5/CDKL5/LEPR/VXN/NUMB/AXL/MAN2A1/ACAP3/FZD3	31
GO:0030522	intracellular receptor signaling pathway	11/998	73/16374	0.00449178	0.128337	0.114699	RORA/SREBF1/PLIN5/RORB/LMO3/NCOA1/NR6A1/NR1D1/NR1D2/PPARA/THRA	11
GO:0045445	myoblast differentiation	11/998	73/16374	0.00449178	0.128337	0.114699	RANBP3L/MAP3K5/DDX17/PLCB1/RIPOR2/SOX9/TCF7L2/BOC/MEF2C/EPAS1/DDX5	11
GO:0060291	long-term synaptic potentiation	11/998	73/16374	0.00449178	0.128337	0.114699	NTRK2/EPHA4/FAM107A/SERPINE2/S100B/NFATC4/ADCY8/PRNP/CYP46A1/NLGN3/APOE	11
GO:0008593	regulation of Notch signaling pathway	4/998	12/16374	0.0045747	0.128337	0.114699	LFNG/DTX1/IL6ST/GAS2	4
GO:0010867	positive regulation of triglyceride biosynthetic process	4/998	12/16374	0.0045747	0.128337	0.114699	SREBF1/PLIN5/SLC27A1/SCARB1	4
GO:0098885	modification of postsynaptic actin cytoskeleton	4/998	12/16374	0.0045747	0.128337	0.114699	CTNNA2/ITSN1/TIAM1/WASF3	4
GO:1900272	negative regulation of long-term synaptic potentiation	4/998	12/16374	0.0045747	0.128337	0.114699	EPHA4/FAM107A/PRNP/APOE	4
GO:1902430	negative regulation of amyloid-beta formation	4/998	12/16374	0.0045747	0.128337	0.114699	SPON1/SORL1/PRNP/APOE	4
GO:1904862	inhibitory synapse assembly	4/998	12/16374	0.0045747	0.128337	0.114699	GABRA2/PLXNB1/SEMA4A/SEMA4D	4
GO:1990778	protein localization to cell periphery	13/998	95/16374	0.00494051	0.136937	0.122384	SPTBN1/PPFIA1/KIF1B/TMBIM1/PTPN9/NUMA1/EPB41L2/PIK3R1/DPP10/RAB11FIP2/PPP2R5A/NUMB/GPSM2	13
GO:1900745	positive regulation of p38MAPK cascade	6/998	27/16374	0.00494676	0.136937	0.122384	MAP3K5/SASH1/MINK1/VEGFA/MAP3K3/RELL1	6
GO:0048167	regulation of synaptic plasticity	12/998	85/16374	0.00527197	0.144979	0.129572	GRIN2C/CPEB3/EPHA4/FAM107A/ADCY8/PRNP/CYP46A1/MEF2C/EIF4EBP2/GRIN1/NLGN3/APOE	12
GO:0038066	p38MAPK cascade	8/998	45/16374	0.00532001	0.145344	0.129898	MAP3K5/SASH1/MINK1/VEGFA/PER1/PHLPP1/MAP3K3/RELL1	8
GO:0035239	tube morphogenesis	30/998	301/16374	0.00553349	0.150195	0.134233	ARHGAP24/RORA/HIF3A/GLUL/RAPGEF3/PDE3B/NTRK2/EPHB1/FGFR2/GLI3/RAMP1/PRKCA/SEMA4A/FAP/BCAS3/RHOB/VEGFA/NRP1/THSD7A/ITGB8/VAV3/HIF1A/PRKX/TGFB2/AMOT/ITGAV/EPAS1/LEPR/HDAC7/ADGRG1	30
GO:0034446	substrate adhesion-dependent cell spreading	12/998	86/16374	0.00579633	0.152411	0.136214	EFNA5/DOCK5/MICALL2/MERTK/KANK1/FBLN1/TYRO3/PREX1/NRP1/ITGAV/AXL/PARVA	12
GO:0048169	regulation of long-term neuronal synaptic plasticity	5/998	20/16374	0.00598459	0.152411	0.136214	CAMK2B/KCNJ10/AGT/GRIN1/SYNGR1	5
GO:0048646	anatomical structure formation involved in morphogenesis	33/998	342/16374	0.00610302	0.152411	0.136214	RORA/RAPGEF3/PDE3B/AQP1/SASH1/NRG3/SOX9/FOXO1/RGCC/CTSH/NFATC4/FGF2/PRKCA/COBL/SEMA4A/RHOB/AGT/DDAH1/VEGFA/NRP1/LFNG/ITGB8/FAIM2/HIF1A/TGFB2/MEF2C/AMOT/ADAM12/PGK1/PPARA/EGLN1/AGTPBP1/THBS4	33
GO:0009749	response to glucose	11/998	76/16374	0.00612721	0.152411	0.136214	GLUL/GJA1/SREBF1/TXNIP/TCF7L2/PFKL/ADCY8/ATG7/ENSA/RAB11FIP2/PFKFB2	11
GO:0021987	cerebral cortex development	11/998	76/16374	0.00612721	0.152411	0.136214	NTRK2/PLCB1/BBS2/NCOA1/EMX2/SLC2A1/HIF1A/BNIP3/GRIN1/MCPH1/ADGRG1	11
GO:0010038	response to metal ion	4/998	13/16374	0.00629245	0.152411	0.136214	NDRG1/MT1X/MT2A/MT3	4
GO:0061045	negative regulation of wound healing	4/998	13/16374	0.00629245	0.152411	0.136214	GJA1/FGF2/CD109/SMAD3	4
GO:0061298	retina vasculature development in camera-type eye	4/998	13/16374	0.00629245	0.152411	0.136214	PDGFRB/NRP1/HIF1A/NDP	4
GO:0070265	necrotic cell death	4/998	13/16374	0.00629245	0.152411	0.136214	MT-CO2/MT3/BNIP3/NOL3	4
GO:0071850	mitotic cell cycle arrest	4/998	13/16374	0.00629245	0.152411	0.136214	MAGI2/RGCC/FAP/MCPH1	4
GO:2001222	regulation of neuron migration	4/998	13/16374	0.00629245	0.152411	0.136214	FLRT2/CTNNA2/CAMK2B/CAMK2A	4
GO:0006656	phosphatidylcholine biosynthetic process	7/998	37/16374	0.00630052	0.152411	0.136214	LPIN1/CHPT1/ACSL3/PCTP/LPIN3/SLC27A1/CAPN2	7
GO:0042063	gliogenesis	7/998	37/16374	0.00630052	0.152411	0.136214	LGI4/EPHA4/METRN/TGFB2/DTX1/KLF15/LEPR	7
GO:0007044	cell-substrate junction assembly	10/998	66/16374	0.00634523	0.152411	0.136214	EFNA5/SDC4/DLC1/FAM107A/COL16A1/MACF1/BCAS3/VEGFA/NRP1/SMAD3	10
GO:0032870	cellular response to hormone stimulus	14/998	109/16374	0.00639183	0.152411	0.136214	RORA/RORB/THRB/MT3/NR6A1/NR1D1/NR1D2/RARB/ABHD2/PPARA/LEPR/RXRA/THRA/KDM3A	14
GO:0198738	cell-cell signaling by wnt	20/998	179/16374	0.00641597	0.152411	0.136214	WWOX/NDRG2/APCDD1/ZNRF3/DKK3/WIF1/AMER2/CTNND2/LRP4/TNIK/RNF43/APC2/CPE/KREMEN1/MACF1/DAAM2/SLC9A3R1/WLS/TMEM170B/CTNNBIP1	20
GO:0061337	cardiac conduction	13/998	98/16374	0.00643609	0.152411	0.136214	ATP1A2/ASPH/CACNB2/RYR3/CACNA2D3/FXYD1/ATP1B2/AGT/KCND3/KCNIP4/RYR1/TRPC1/AKAP9	13
GO:0007033	vacuole organization	3/998	7/16374	0.00656316	0.152411	0.136214	MTM1/NDP/MAN2A1	3
GO:0009056	catabolic process	3/998	7/16374	0.00656316	0.152411	0.136214	CST3/VSIR/FAP	3
GO:0009649	entrainment of circadian clock	3/998	7/16374	0.00656316	0.152411	0.136214	GNAQ/PER1/PHLPP1	3
GO:0060998	regulation of dendritic spine development	3/998	7/16374	0.00656316	0.152411	0.136214	CPEB3/CAMK2B/MEF2C	3
GO:0071864	positive regulation of cell proliferation in bone marrow	3/998	7/16374	0.00656316	0.152411	0.136214	FGFR2/MEF2C/MAP3K3	3
GO:0072282	metanephric nephron tubule morphogenesis	3/998	7/16374	0.00656316	0.152411	0.136214	LGR4/SOX9/HES5	3
GO:1903599	positive regulation of autophagy of mitochondrion	3/998	7/16374	0.00656316	0.152411	0.136214	HIF1A/BNIP3/FBXO7	3
GO:1990144	intrinsic apoptotic signaling pathway in response to hypoxia	3/998	7/16374	0.00656316	0.152411	0.136214	ENO1/BNIP3/NOL3	3
GO:2000369	regulation of clathrin-dependent endocytosis	3/998	7/16374	0.00656316	0.152411	0.136214	HIP1R/DNAJC6/TNK2	3
GO:0010001	glial cell differentiation	15/998	121/16374	0.00675572	0.156016	0.139436	GSN/GPR37L1/EPHA4/SOX9/SERPINE2/PLP1/DAAM2/MT3/METRN/NTRK3/DTX1/KLF15/HES5/IL6ST/WASF3	15
GO:0030072	peptide hormone secretion	18/998	156/16374	0.00679903	0.156154	0.139559	GLUL/RAPGEF3/GJA1/SREBF1/ITSN1/GLUD1/CD38/TCF7L2/CPE/SYTL4/PFKL/PRKCA/SLC2A1/SYT9/KALRN/ENSA/PFKFB2/STXBP5L	18
GO:0048010	vascular endothelial growth factor receptor signaling pathway	12/998	88/16374	0.00696867	0.158393	0.14156	ABI1/MT3/VEGFA/NRP1/VAV3/HIF1A/ITGAV/PIK3R1/NCK2/MAPK11/ELMO2/AXL	12
GO:0120163	negative regulation of cold-induced thermogenesis	8/998	47/16374	0.00697231	0.158393	0.14156	ACOT11/LGR4/ALDH1A1/PCTP/NR1D1/PLCL1/ZNF423/LAMA4	8
GO:0043001	Golgi to plasma membrane protein transport	6/998	29/16374	0.00715541	0.159249	0.142325	BBS2/SPTBN1/ACSL3/MACF1/RAB34/KIF13A	6
GO:2000310	regulation of NMDA receptor activity	6/998	29/16374	0.00715541	0.159249	0.142325	GRIA2/DAPK1/MEF2C/GRIN1/NLGN3/PPARGC1A	6
GO:0048468	cell development	23/998	218/16374	0.00729022	0.159249	0.142325	LGI1/CNTN1/LGI4/NTM/MICALL2/GJA1/SLC1A3/ANK2/HSF4/SOX9/LAMA1/PTH1R/EFHD1/TTPA/VEGFA/MEF2C/NCDN/BTBD8/EPAS1/HES5/CLMN/AXL/APOE	23
GO:0007223	Wnt signaling pathway, calcium modulating pathway	7/998	38/16374	0.00732598	0.159249	0.142325	PLCB1/TCF7L2/TNRC6B/CAMK2A/NFATC1/CALM1/FZD3	7
GO:0010659	cardiac muscle cell apoptotic process	7/998	38/16374	0.00732598	0.159249	0.142325	MAP3K5/CAMK2A/AGT/BNIP3/CAPN2/NOL3/SIRT5	7
GO:0030178	negative regulation of Wnt signaling pathway	7/998	38/16374	0.00732598	0.159249	0.142325	WWOX/APCDD1/ZNRF3/WIF1/RNF43/NFATC4/NFATC1	7
GO:0035108	limb morphogenesis	11/998	78/16374	0.0074546	0.159249	0.142325	ASPH/GJA1/LRP4/PLXNA2/SOX9/FGFR2/GLI3/ZBTB16/PTCH1/FREM2/PCSK5	11
GO:0005980	glycogen catabolic process	5/998	21/16374	0.00746715	0.159249	0.142325	PHKA1/AGL/PGM1/PYGB/CALM1	5
GO:0031638	zymogen activation	5/998	21/16374	0.00746715	0.159249	0.142325	KLKB1/VSIR/SERPINE2/CTSH/ENO1	5
GO:0035024	negative regulation of Rho protein signal transduction	5/998	21/16374	0.00746715	0.159249	0.142325	DLC1/ADRA1A/KANK1/RIPOR2/KCTD13	5
GO:0050772	positive regulation of axonogenesis	5/998	21/16374	0.00746715	0.159249	0.142325	NTRK2/TRAK1/NIN/METRN/TIAM1	5
GO:0051000	positive regulation of nitric-oxide synthase activity	5/998	21/16374	0.00746715	0.159249	0.142325	S100A1/DHFR/HIF1A/SCARB1/APOE	5
GO:0035637	multicellular organismal signaling	12/998	89/16374	0.00762091	0.161702	0.144518	ATP1A2/ASPH/RYR3/NTRK2/FXYD1/ATP1B2/KCNA2/AGT/MYH14/NTRK3/RYR1/TRPC1	12
GO:0048008	platelet-derived growth factor receptor signaling pathway	8/998	48/16374	0.00793088	0.166858	0.149126	TXNIP/HIP1R/BCR/PDGFRB/NRP1/SLC9A3R1/NDRG4/PDGFC	8
GO:0008285	negative regulation of cell population proliferation	36/998	388/16374	0.00794374	0.166858	0.149126	ERBB4/RPS6KA2/ASPH/RERG/DLC1/ADRA1A/NDRG1/MAGI2/ABI1/SERPINE2/PTH1R/GJB6/GLI3/RGCC/ZBTB16/TNS2/PMP22/DDAH1/PLPP1/FBXO2/MXI1/SLC9A3R1/TGFB2/ZBTB7C/NACC2/FGFRL1/RARB/NCK2/CGRRF1/DNAJB2/WNK2/TOB2/INPPL1/SPEG/ADGRG1/CAMK2N1	36
GO:0014068	positive regulation of phosphatidylinositol 3-kinase signaling	11/998	79/16374	0.00819717	0.169787	0.151743	ERBB4/NTRK2/PLXNB1/SOX9/PDGFRB/AGT/PRR5/NTRK3/SEMA4D/TGFB2/PIK3R1	11
GO:0003416	endochondral bone growth	4/998	14/16374	0.00838986	0.169787	0.151743	FGFR3/FGFR2/RARB/BNC2	4
GO:0006646	phosphatidylethanolamine biosynthetic process	4/998	14/16374	0.00838986	0.169787	0.151743	ETNPPL/LPIN1/LPIN3/SLC27A1	4
GO:0007214	gamma-aminobutyric acid signaling pathway	4/998	14/16374	0.00838986	0.169787	0.151743	GABRA2/GABBR1/GABRB1/PLCL1	4
GO:0046928	regulation of neurotransmitter secretion	4/998	14/16374	0.00838986	0.169787	0.151743	CAMK2A/SNCG/MEF2C/RHOT1	4
GO:0055093	response to hyperoxia	4/998	14/16374	0.00838986	0.169787	0.151743	MT-ATP6/MT-CYB/PDGFRB/BNIP3	4
GO:0061178	regulation of insulin secretion involved in cellular response to glucose stimulus	4/998	14/16374	0.00838986	0.169787	0.151743	EFNA5/TIAM1/NR1D1/HMGN3	4
GO:0098773	skin epidermis development	7/998	39/16374	0.00846984	0.169787	0.151743	LGR4/APCDD1/LRP4/SOX9/TGFB2/CD109/FZD3	7
GO:0030198	extracellular matrix organization	23/998	221/16374	0.00854859	0.169787	0.151743	HPSE2/COL5A3/CSGALNACT1/CST3/NCAN/BSG/SOX9/LAMA1/COL16A1/RGCC/FBLN1/FGF2/FAP/AGT/CD47/ITGB8/ADAM12/ITGA7/ITGAV/ITGB4/ABI3BP/LAMA4/SMAD3	23
GO:0006936	muscle contraction	17/998	148/16374	0.00875241	0.169787	0.151743	ATP1A2/ASPH/GJA1/FXYD1/MYBPC1/MYLK/SNTA1/LMOD1/ENO1/PABPN1/CKMT2/SSPN/RYR1/SORBS3/PPP1R12B/NEB/CALM1	17
GO:0048839	inner ear development	15/998	125/16374	0.00905977	0.169787	0.151743	STOX1/EYA1/ZIC1/FGFR2/GJB6/BCR/PDGFRB/PRRX1/ABR/NTRK3/FREM2/TGFB2/SOBP/BMPER/FZD3	15
GO:0008589	regulation of smoothened signaling pathway	5/998	22/16374	0.00918735	0.169787	0.151743	RORA/ZIC1/FGFR2/FBXL17/PTCH1	5
GO:0010613	positive regulation of cardiac muscle hypertrophy	5/998	22/16374	0.00918735	0.169787	0.151743	ADRA1A/PRKCA/AGT/CDK9/IL6ST	5
GO:0014898	cardiac muscle hypertrophy in response to stress	5/998	22/16374	0.00918735	0.169787	0.151743	FOXO1/MEF2C/ERRFI1/KLF15/SMAD3	5
GO:0099625	ventricular cardiac muscle cell membrane repolarization	5/998	22/16374	0.00918735	0.169787	0.151743	GJA1/ANK2/SNTA1/KCND3/AKAP9	5
GO:0051216	cartilage development	15/998	126/16374	0.00972327	0.169787	0.151743	FGFR3/CSGALNACT1/BBS2/SOX9/PTH1R/PRRX1/FGF2/ZBTB16/ITGB8/HIF1A/MEF2C/SNORC/HES5/THRA/TRIP11	15
GO:0008277	regulation of G protein-coupled receptor signaling pathway	7/998	40/16374	0.00973967	0.169787	0.151743	PLCB1/RGS11/RAMP1/KCTD8/GNG7/GRK4/GIT1	7
GO:0019395	fatty acid oxidation	7/998	40/16374	0.00973967	0.169787	0.151743	PLIN5/ACACB/ABCD2/PDK4/PPARA/ACADVL/PPARGC1A	7
GO:0071396	cellular response to lipid	12/998	92/16374	0.00986795	0.169787	0.151743	RORA/RORB/THRB/NR6A1/NR1D1/NR1D2/RARB/ABHD2/PPARA/RXRA/SCARB1/THRA	12
GO:0002027	regulation of heart rate	6/998	31/16374	0.0100001	0.169787	0.151743	PDE4D/ANK2/SNTA1/AGT/EPAS1/CALM1	6
GO:0009409	response to cold	6/998	31/16374	0.0100001	0.169787	0.151743	ACOT11/MT-CO2/GMPR/ACADVL/THRA/PPARGC1A	6
GO:0021702	cerebellar Purkinje cell differentiation	3/998	8/16374	0.0100285	0.169787	0.151743	RORA/FAIM2/AGTPBP1	3
GO:0031958	corticosteroid receptor signaling pathway	3/998	8/16374	0.0100285	0.169787	0.151743	LMO3/PER1/CRY2	3
GO:0032906	transforming growth factor beta2 production	3/998	8/16374	0.0100285	0.169787	0.151743	HIF1A/TGFB2/SMAD3	3
GO:0035696	monocyte extravasation	3/998	8/16374	0.0100285	0.169787	0.151743	PLCB1/SIRPA/CD47	3
GO:0046951	ketone body biosynthetic process	3/998	8/16374	0.0100285	0.169787	0.151743	ACSS3/HMGCLL1/BDH1	3
GO:0048799	animal organ maturation	3/998	8/16374	0.0100285	0.169787	0.151743	PLXNB1/SEMA4D/RYR1	3
GO:0060977	coronary vasculature morphogenesis	3/998	8/16374	0.0100285	0.169787	0.151743	TGFBR3/SGCD/NRP1	3
GO:1900119	positive regulation of execution phase of apoptosis	3/998	8/16374	0.0100285	0.169787	0.151743	DLC1/FAP/TP53BP2	3
GO:0016311	dephosphorylation	14/998	115/16374	0.0101478	0.169787	0.151743	CAMTA1/LPIN1/DLC1/NSMF/INPP4B/NT5DC1/NT5E/LPIN3/NT5C2/PFKFB3/HDDC2/PFKFB2/PPP2R5A/CALM1	14
GO:0001501	skeletal system development	25/998	250/16374	0.0102595	0.169787	0.151743	WWOX/GJA1/FGFR3/CSGALNACT1/EYA1/BBS2/SOX9/PTH1R/FGFR2/GLI3/PRELP/PRRX1/ZBTB16/ITGB8/HIF1A/TGFB2/SNORC/FGFRL1/PDGFC/ANKH/HES5/CDH11/MCPH1/WDR60/SUFU	25
GO:0007411	axon guidance	19/998	175/16374	0.0104197	0.169787	0.151743	UNC5C/LGI1/FLRT2/SEMA3B/EPHB1/NEO1/GFRA1/GLI3/SPTBN1/PRKCA/BOC/VEGFA/NRP1/DPYSL2/PIK3R1/KLF7/GPC1/SPTAN1/FZD3	19
GO:0006816	calcium ion transport	18/998	163/16374	0.0105445	0.169787	0.151743	ATP1A2/CACNB2/RYR3/GJA1/BCL2/CAMK2G/CAMK2B/MYLK/ANK2/CDH23/CACNA1B/PDGFRB/RAMP1/CAMK2A/WFS1/AGT/RYR1/TRPC1	18
GO:0000023	maltose metabolic process	2/998	3/16374	0.0106827	0.169787	0.151743	MGAM/GANC	2
GO:0002155	regulation of thyroid hormone mediated signaling pathway	2/998	3/16374	0.0106827	0.169787	0.151743	NCOA1/THRA	2
GO:0003331	positive regulation of extracellular matrix constituent secretion	2/998	3/16374	0.0106827	0.169787	0.151743	RGCC/AGT	2
GO:0006089	lactate metabolic process	2/998	3/16374	0.0106827	0.169787	0.151743	HIF1A/PFKFB2	2
GO:0010693	negative regulation of alkaline phosphatase activity	2/998	3/16374	0.0106827	0.169787	0.151743	SEMA4D/TGFB2	2
GO:0010871	negative regulation of receptor biosynthetic process	2/998	3/16374	0.0106827	0.169787	0.151743	NR1D1/PPARA	2
GO:0021775	smoothened signaling pathway involved in ventral spinal cord interneuron specification	2/998	3/16374	0.0106827	0.169787	0.151743	GLI3/SUFU	2
GO:0021776	smoothened signaling pathway involved in spinal cord motor neuron cell fate specification	2/998	3/16374	0.0106827	0.169787	0.151743	GLI3/SUFU	2
GO:0033366	protein localization to secretory granule	2/998	3/16374	0.0106827	0.169787	0.151743	CPE/SCG3	2
GO:0035542	regulation of SNARE complex assembly	2/998	3/16374	0.0106827	0.169787	0.151743	STXBP6/SEPT8	2
GO:0038091	positive regulation of cell proliferation by VEGF-activated platelet derived growth factor receptor signaling pathway	2/998	3/16374	0.0106827	0.169787	0.151743	PDGFRB/VEGFA	2
GO:0042853	L-alanine catabolic process	2/998	3/16374	0.0106827	0.169787	0.151743	GPT2/GPT	2
GO:0045069	regulation of viral genome replication	2/998	3/16374	0.0106827	0.169787	0.151743	BCL2/DDX5	2
GO:0045925	positive regulation of female receptivity	2/998	3/16374	0.0106827	0.169787	0.151743	NCOA1/THRA	2
GO:0051935	glutamate reuptake	2/998	3/16374	0.0106827	0.169787	0.151743	ATP1A2/KCNJ10	2
GO:0060453	regulation of gastric acid secretion	2/998	3/16374	0.0106827	0.169787	0.151743	HIP1R/SGK1	2
GO:0060547	negative regulation of necrotic cell death	2/998	3/16374	0.0106827	0.169787	0.151743	MT3/NOL3	2
GO:0060594	mammary gland specification	2/998	3/16374	0.0106827	0.169787	0.151743	FGFR2/GLI3	2
GO:0060633	negative regulation of transcription initiation from RNA polymerase II promoter	2/998	3/16374	0.0106827	0.169787	0.151743	ZNF451/CTNNBIP1	2
GO:0060978	angiogenesis involved in coronary vascular morphogenesis	2/998	3/16374	0.0106827	0.169787	0.151743	PDGFRB/NRP1	2
GO:0061005	cell differentiation involved in kidney development	2/998	3/16374	0.0106827	0.169787	0.151743	GLI3/PTCH1	2
GO:0061643	chemorepulsion of axon	2/998	3/16374	0.0106827	0.169787	0.151743	UNC5C/SEMA3B	2
GO:0072243	metanephric nephron epithelium development	2/998	3/16374	0.0106827	0.169787	0.151743	LGR4/HES5	2
GO:0090259	regulation of retinal ganglion cell axon guidance	2/998	3/16374	0.0106827	0.169787	0.151743	VEGFA/NRP1	2
GO:0090292	nuclear matrix anchoring at nuclear membrane	2/998	3/16374	0.0106827	0.169787	0.151743	SYNE1/SUN2	2
GO:1903539	protein localization to postsynaptic membrane	2/998	3/16374	0.0106827	0.169787	0.151743	GRIN2C/GRIN1	2
GO:1904694	negative regulation of vascular smooth muscle contraction	2/998	3/16374	0.0106827	0.169787	0.151743	DOCK5/DOCK4	2
GO:1905337	positive regulation of aggrephagy	2/998	3/16374	0.0106827	0.169787	0.151743	HSPB8/BAG3	2
GO:2000050	regulation of non-canonical Wnt signaling pathway	2/998	3/16374	0.0106827	0.169787	0.151743	DAAM2/TIAM1	2
GO:2001016	positive regulation of skeletal muscle cell differentiation	2/998	3/16374	0.0106827	0.169787	0.151743	MEF2C/GPC1	2
GO:2001247	positive regulation of phosphatidylcholine biosynthetic process	2/998	3/16374	0.0106827	0.169787	0.151743	ACSL3/CAPN2	2
GO:0050731	positive regulation of peptidyl-tyrosine phosphorylation	11/998	82/16374	0.0107724	0.170563	0.152437	EFNA5/CNTN1/LRP4/AGT/PRNP/VEGFA/NRP1/SEMA4D/CD81/TNK2/THBS4	11
GO:0034440	lipid oxidation	4/998	15/16374	0.0108971	0.170599	0.152469	PDK4/PPARA/ACADVL/PPARGC1A	4
GO:0042921	glucocorticoid receptor signaling pathway	4/998	15/16374	0.0108971	0.170599	0.152469	LMO3/ARID1A/PER1/CRY2	4
GO:0050773	regulation of dendrite development	4/998	15/16374	0.0108971	0.170599	0.152469	CAMK1D/PREX1/CDKL5/KNDC1	4
GO:0055114	oxidation-reduction process	43/998	492/16374	0.0110178	0.171183	0.152991	WWOX/EGLN3/ALDH1L1/ALDH1A1/AIFM3/BCKDHB/GLUD1/CYB5B/SCD5/DHFR/ALDH7A1/HEPH/TRMT9B/SELENBP1/ADI1/CHDH/PLOD2/CYP46A1/GMPR/MGST1/MSRB3/SESN1/ENOX1/PRDX6/GFOD1/PHYHD1/OXR1/ADHFE1/FADS2/CYBRD1/CRYL1/BDH1/FASN/LDHB/P4HA1/SMOX/HSDL2/EGLN1/PIR/BBOX1/TECR/KDM3A/TTC19	43
GO:0097190	apoptotic signaling pathway	23/998	226/16374	0.0110349	0.171183	0.152991	TPD52L1/MAP3K5/WWOX/BCL2/SEPT4/EYA2/CD38/TCF7L2/CTSH/NFATC4/PRKCA/DAPK1/AGT/NRP1/SLC9A3R1/BNIP3/ITM2C/NOL3/ITGAV/RHOT1/GCLC/CRADD/UACA	23
GO:0019933	cAMP-mediated signaling	9/998	61/16374	0.0111358	0.171183	0.152991	RAPGEF3/PDE3B/ADCY2/PDE4D/SOX9/PRKCA/ADCYAP1R1/EIF4EBP2/PEX5L	9
GO:0035773	insulin secretion involved in cellular response to glucose stimulus	9/998	61/16374	0.0111358	0.171183	0.152991	EFNA5/ARRB1/ADCY8/TIAM1/NR1D1/HIF1A/RAB11FIP2/KLF7/HMGN3	9
GO:0086064	cell communication by electrical coupling involved in cardiac conduction	5/998	23/16374	0.0111621	0.171183	0.152991	ATP1A2/GJA1/PDE4D/ATP1B2/CALM1	5
GO:0006629	lipid metabolic process	24/998	239/16374	0.0111801	0.171183	0.152991	RORA/PDE3B/SREBF1/ME1/CPNE6/CHPT1/NCOA1/STARD3/TTPA/AGT/PLPP1/MGLL/NR1D1/SLC27A1/PLCL1/NR1D2/FDFT1/PPARA/JAZF1/ABCA2/RXRA/PC/THRA/APOE	24
GO:0032963	collagen metabolic process	8/998	51/16374	0.0114022	0.173946	0.155461	CST3/VSIR/RGCC/PDGFRB/TNS2/FAP/HIF1A/ERRFI1	8
GO:0009790	embryo development	12/998	94/16374	0.0116302	0.176779	0.157993	ERBB4/PLCB1/LAMA1/FGFR2/FGF2/ZBTB16/PTCH1/PDGFC/AMOT/RBBP6/LAMA4/SMAD3	12
GO:0071276	cellular response to cadmium ion	6/998	32/16374	0.0116883	0.177019	0.158207	GSN/MT1X/MT1G/MT1E/MT1F/MT3	6
GO:0050728	negative regulation of inflammatory response	11/998	83/16374	0.0117557	0.177396	0.158544	RORA/SIRPA/BCR/TYRO3/NT5E/ABR/NR1D1/NR1D2/PPARA/SMAD3/APOE	11
GO:0032570	response to progesterone	7/998	42/16374	0.012687	0.189802	0.169632	SREBF1/TXNIP/CD38/GABRB1/NCOA1/TGFB2/ABHD2	7
GO:0055123	digestive system development	7/998	42/16374	0.012687	0.189802	0.169632	LGR4/FGFR2/HIP1R/COBL/WLS/PDGFC/ITGB4	7
GO:0006470	protein dephosphorylation	17/998	154/16374	0.012743	0.189802	0.169632	CAMTA1/DLC1/CTDSPL/BCL2/CAMK2G/NSMF/TNS2/PLPP1/MTM1/PPM1B/PTPN9/PPP2R5A/PTPN4/CALM1/LHPP/PPP2CB/PPP1R3C	17
GO:0061448	connective tissue development	10/998	73/16374	0.0127594	0.189802	0.169632	CSGALNACT1/BBS2/SOX9/PRRX1/ZBTB16/ITGB8/HIF1A/SNORC/HES5/KLF7	10
GO:0007416	synapse assembly	16/998	142/16374	0.0128128	0.18992	0.169737	DNM3/ERBB4/EFNA5/FLRT2/NTRK2/EPHB1/GPM6A/PDLIM5/SEMA4A/NTRK3/SEMA4D/MEF2C/FARP1/GRIN1/EEF2K/NLGN3	16
GO:0008203	cholesterol metabolic process	13/998	107/16374	0.0131569	0.190205	0.169992	SREBF1/GPAM/ACACB/STARD3/SORL1/FDFT1/FASN/LEPR/ACADVL/RXRA/APOE/LMF1/NPC1	13
GO:0008652	cellular amino acid biosynthetic process	5/998	24/16374	0.0134075	0.190205	0.169992	GLUL/NAT8L/GLUD1/GPT2/GPT	5
GO:0035235	ionotropic glutamate receptor signaling pathway	5/998	24/16374	0.0134075	0.190205	0.169992	GRIN2C/GRID1/GRIA2/CPEB4/GRIN1	5
GO:0045879	negative regulation of smoothened signaling pathway	5/998	24/16374	0.0134075	0.190205	0.169992	GPR37L1/SERPINE2/GLI3/PTCH1/SUFU	5
GO:0048736	appendage development	5/998	24/16374	0.0134075	0.190205	0.169992	ASPH/GLI3/PTCH1/PCSK5/ITGB4	5
GO:0051235	maintenance of location	5/998	24/16374	0.0134075	0.190205	0.169992	PLIN5/ACACB/HILPDA/ITGAV/APOE	5
GO:0060828	regulation of canonical Wnt signaling pathway	5/998	24/16374	0.0134075	0.190205	0.169992	CTNND2/GNAQ/KREMEN1/DAAM2/ZNF703	5
GO:0061726	mitochondrion disassembly	5/998	24/16374	0.0134075	0.190205	0.169992	SREBF1/HIF1A/BNIP3/BNIP3L/FBXO7	5
GO:0060429	epithelium development	24/998	243/16374	0.0135119	0.190205	0.169992	ERBB4/LGR4/APCDD1/EYA1/LRP4/PLXNA2/ABI1/SOX9/FGFR2/COBL/CRB2/ZNF703/VEGFA/LFNG/PTCH1/FREM2/TGFB2/MEF2C/CD109/PGK1/ACADVL/ANXA4/SMAD3/FZD3	24
GO:0030224	monocyte differentiation	6/998	33/16374	0.0135677	0.190205	0.169992	MT1G/VEGFA/MEF2C/FASN/PIR/CTNNBIP1	6
GO:0055017	cardiac muscle tissue growth	4/998	16/16374	0.0138407	0.190205	0.169992	TGFBR3/TGFB2/NDRG4/RXRA	4
GO:0060122	inner ear receptor cell stereocilium organization	4/998	16/16374	0.0138407	0.190205	0.169992	SDC4/CDH23/HES5/TRIP11	4
GO:0061684	chaperone-mediated autophagy	4/998	16/16374	0.0138407	0.190205	0.169992	SYNPO2/BAG3/ATG7/SNRNP70	4
GO:0048666	neuron development	20/998	193/16374	0.0141642	0.190205	0.169992	DGKG/LGI1/CNTN1/SDC4/LGI4/NTM/MICALL2/ALK/SLC1A3/CDH23/LAMA1/EFHD1/TGFB2/MEF2C/NCDN/BTBD8/HES5/CLMN/APOE/TRIP11	20
GO:1903779	regulation of cardiac conduction	8/998	53/16374	0.0142675	0.190205	0.169992	ATP1A2/ASPH/RYR3/FXYD1/ATP1B2/AGT/RYR1/TRPC1	8
GO:0003299	muscle hypertrophy in response to stress	3/998	9/16374	0.014368	0.190205	0.169992	FOXO1/ERRFI1/SMAD3	3
GO:0003301	physiological cardiac muscle hypertrophy	3/998	9/16374	0.014368	0.190205	0.169992	ADRA1A/PDLIM5/AGT	3
GO:0006171	cAMP biosynthetic process	3/998	9/16374	0.014368	0.190205	0.169992	ADCY2/ADCY3/ADCY9	3
GO:0010594	regulation of endothelial cell migration	3/998	9/16374	0.014368	0.190205	0.169992	GLUL/SEMA4A/BMPER	3
GO:0014824	artery smooth muscle contraction	3/998	9/16374	0.014368	0.190205	0.169992	CD38/BBS2/AGT	3
GO:0014887	cardiac muscle adaptation	3/998	9/16374	0.014368	0.190205	0.169992	FOXO1/ERRFI1/SMAD3	3
GO:0021694	cerebellar Purkinje cell layer formation	3/998	9/16374	0.014368	0.190205	0.169992	RORA/FAIM2/AGTPBP1	3
GO:0030007	cellular potassium ion homeostasis	3/998	9/16374	0.014368	0.190205	0.169992	ATP1A2/ATP1B2/KCNMA1	3
GO:0033689	negative regulation of osteoblast proliferation	3/998	9/16374	0.014368	0.190205	0.169992	BCL2/PLXNB1/SMAD3	3
GO:0043129	surfactant homeostasis	3/998	9/16374	0.014368	0.190205	0.169992	CTSH/VEGFA/EPAS1	3
GO:0045722	positive regulation of gluconeogenesis	3/998	9/16374	0.014368	0.190205	0.169992	FOXO1/PPARA/PPARGC1A	3
GO:0048712	negative regulation of astrocyte differentiation	3/998	9/16374	0.014368	0.190205	0.169992	GPR37L1/NTRK3/HES5	3
GO:0051963	regulation of synapse assembly	3/998	9/16374	0.014368	0.190205	0.169992	PDLIM5/MEF2C/GRIN1	3
GO:0072273	metanephric nephron morphogenesis	3/998	9/16374	0.014368	0.190205	0.169992	LGR4/PDGFRB/HES5	3
GO:0072537	fibroblast activation	3/998	9/16374	0.014368	0.190205	0.169992	RGCC/PDGFRB/GCLC	3
GO:0097104	postsynaptic membrane assembly	3/998	9/16374	0.014368	0.190205	0.169992	MAGI2/LRP4/NLGN3	3
GO:0045668	negative regulation of osteoblast differentiation	7/998	43/16374	0.0143792	0.190205	0.169992	RANBP3L/RORB/SEMA4D/PTCH1/HDAC7/SMAD3/SUFU	7
GO:0051145	smooth muscle cell differentiation	7/998	43/16374	0.0143792	0.190205	0.169992	OLFM2/FGFR2/NFATC4/NFATC1/NFATC2/MEF2C/PIAS1	7
GO:0060840	artery development	7/998	43/16374	0.0143792	0.190205	0.169992	EYA1/GLI3/PDGFRB/PRRX1/VEGFA/NRP1/APOE	7
GO:0001822	kidney development	15/998	132/16374	0.0145477	0.191827	0.171442	LGR4/LRP4/SOX9/GLI3/PDGFRB/WFS1/RIDA/TNS2/AGT/VEGFA/PTCH1/PRKX/TGFB2/PCSK5/FSTL3	15
GO:0007178	transmembrane receptor protein serine/threonine kinase signaling pathway	21/998	207/16374	0.0151792	0.199525	0.178322	DKK3/MAGI2/NEO1/HTRA1/LDLRAD4/TGFBR3/SPTBN1/CRB2/ZNF703/PRDM16/VASN/TGFB2/CD109/ZNF451/NUMA1/CHRDL1/FSTL3/HES5/ZNF423/BMPER/SMAD3	21
GO:0019432	triglyceride biosynthetic process	6/998	34/16374	0.0156482	0.204991	0.183206	LPIN1/SREBF1/PLIN5/GPAM/SLC27A1/SCARB1	6
GO:0042552	myelination	12/998	98/16374	0.0158705	0.204991	0.183206	LGI4/PARD3/NDRG1/ACSBG1/MAL/S100B/ABCD2/RARB/HES5/GPC1/WASF3/SERINC5	12
GO:0007263	nitric oxide mediated signal transduction	5/998	25/16374	0.0159383	0.204991	0.183206	MT2A/AGT/DDAH1/VEGFA/APOE	5
GO:0033687	osteoblast proliferation	5/998	25/16374	0.0159383	0.204991	0.183206	BCL2/PLXNB1/FGFR2/ITGAV/SMAD3	5
GO:0035307	positive regulation of protein dephosphorylation	5/998	25/16374	0.0159383	0.204991	0.183206	CAMTA1/DLC1/NSMF/PPP2R5A/CALM1	5
GO:0051894	positive regulation of focal adhesion assembly	5/998	25/16374	0.0159383	0.204991	0.183206	SDC4/COL16A1/VEGFA/NRP1/SMAD3	5
GO:0060045	positive regulation of cardiac muscle cell proliferation	5/998	25/16374	0.0159383	0.204991	0.183206	ERBB4/FGFR2/TGFBR3/FGF2/MEF2C	5
GO:0007163	establishment or maintenance of cell polarity	7/998	44/16374	0.0162264	0.20742	0.185377	PARD3/MAP7/KANK1/RIPOR2/BCAS3/CRB1/PARVA	7
GO:0010718	positive regulation of epithelial to mesenchymal transition	7/998	44/16374	0.0162264	0.20742	0.185377	TCF7L2/RGCC/CRB2/ZNF703/TIAM1/TGFB2/SMAD3	7
GO:0072657	protein localization to membrane	13/998	110/16374	0.016311	0.207866	0.185776	GSN/CPE/SPTBN1/TIAM1/PPFIA1/TMBIM1/PTPN9/CD81/PIK3R1/DPP10/RAB11FIP2/PPP2R5A/NUMB	13
GO:0036294	cellular response to decreased oxygen levels	11/998	87/16374	0.0163855	0.208181	0.186058	HIF3A/EGLN3/STOX1/CPEB4/PSMA1/DDAH1/VEGFA/HIF1A/BNIP3/EPAS1/EGLN1	11
GO:0042471	ear morphogenesis	10/998	76/16374	0.0166561	0.210978	0.188557	EYA1/ZIC1/FGFR2/GJB6/BCR/PRRX1/ABR/SOBP/TSHZ1/FZD3	10
GO:0048562	embryonic organ morphogenesis	12/998	99/16374	0.017093	0.215802	0.192869	STOX1/EYA1/ZIC1/SOX9/FGFR2/BCR/PRRX1/CRB2/ABR/SOBP/TSHZ1/FZD3	12
GO:0034199	activation of protein kinase A activity	4/998	17/16374	0.0172435	0.215802	0.192869	ADCY2/ADCY8/ADCY3/ADCY9	4
GO:0043523	regulation of neuron apoptotic process	4/998	17/16374	0.0172435	0.215802	0.192869	EGLN3/NSMF/FAIM2/MEF2C	4
GO:0085029	extracellular matrix assembly	4/998	17/16374	0.0172435	0.215802	0.192869	SOX9/RGCC/AGT/SMAD3	4
GO:0003007	heart morphogenesis	13/998	111/16374	0.0174807	0.217468	0.194358	FLRT2/GJA1/DLC1/EYA1/SOX9/TGFBR3/VEGFA/PTCH1/HIF1A/TGFB2/MEF2C/RYR1/EGLN1	13
GO:0018209	peptidyl-serine modification	13/998	111/16374	0.0174807	0.217468	0.194358	RAPGEF3/NTRK2/ARRB1/STOX1/BCL2/PDE4D/DDIT4/VEGFA/NTRK3/PLCL1/TERF2IP/NCK2/AKAP9	13
GO:0035914	skeletal muscle cell differentiation	8/998	55/16374	0.0176236	0.217948	0.194787	DDX17/EPHB1/S100B/HLF/MEF2C/NR1D2/GPC1/DDX5	8
GO:0060173	limb development	8/998	55/16374	0.0176236	0.217948	0.194787	ASPH/ZNRF3/LRP4/GLI3/KREMEN1/PTCH1/PCSK5/ITGB4	8
GO:0043277	apoptotic cell clearance	6/998	35/16374	0.0179393	0.220321	0.196907	MERTK/TYRO3/MEGF10/ITGAV/SCARB1/AXL	6
GO:0001942	hair follicle development	10/998	77/16374	0.0181323	0.220321	0.196907	LGR4/APCDD1/BCL2/LRP4/SOX9/FGFR2/TGFB2/CD109/NUMA1/FZD3	10
GO:0001558	regulation of cell growth	9/998	66/16374	0.0181626	0.220321	0.196907	FAM107A/NRG3/SPOCK1/IL17RB/CHPT1/SGK1/AGT/SGK3/KIAA1109	9
GO:0070373	negative regulation of ERK1 and ERK2 cascade	9/998	66/16374	0.0181626	0.220321	0.196907	NDRG2/ARRB1/LMO3/SIRPA/FBLN1/SLC9A3R1/ERRFI1/WNK2/CAMK2N1	9
GO:0010508	positive regulation of autophagy	7/998	45/16374	0.0182354	0.220321	0.196907	TPCN1/FOXO1/DAPK1/TRIM8/BNIP3/ATG7/FOXO3	7
GO:0009062	fatty acid catabolic process	5/998	26/16374	0.0187681	0.220321	0.196907	LPIN1/PLIN5/ACACB/ABCD2/PPARA	5
GO:0022011	myelination in peripheral nervous system	5/998	26/16374	0.0187681	0.220321	0.196907	LGI4/PARD3/NTRK2/NDRG1/NTRK3	5
GO:0046854	phosphatidylinositol phosphorylation	5/998	26/16374	0.0187681	0.220321	0.196907	EFR3B/PIP4K2A/EFR3A/PIP5K1B/PIK3R1	5
GO:0030041	actin filament polymerization	11/998	89/16374	0.0191566	0.220321	0.196907	MICALL2/GSN/FAM107A/KANK1/HIP1R/LMOD1/COBL/PREX1/NCK2/FCHSD2/WASF3	11
GO:0030521	androgen receptor signaling pathway	8/998	56/16374	0.0194985	0.220321	0.196907	DDX17/NCOA1/PLPP1/ARID1A/PIAS1/DDX5/KDM3A/PPARGC1A	8
GO:0002209	behavioral defense response	3/998	10/16374	0.0196081	0.220321	0.196907	GJA1/MEF2C/APOE	3
GO:0032000	positive regulation of fatty acid beta-oxidation	3/998	10/16374	0.0196081	0.220321	0.196907	PLIN5/ABCD2/PPARA	3
GO:0036376	sodium ion export across plasma membrane	3/998	10/16374	0.0196081	0.220321	0.196907	ATP1A2/FXYD1/ATP1B2	3
GO:0060068	vagina development	3/998	10/16374	0.0196081	0.220321	0.196907	MERTK/TYRO3/AXL	3
GO:0071313	cellular response to caffeine	3/998	10/16374	0.0196081	0.220321	0.196907	RYR3/RYR1/PPARGC1A	3
GO:0071709	membrane assembly	3/998	10/16374	0.0196081	0.220321	0.196907	MAGI2/SPTBN1/SYT11	3
GO:0072028	nephron morphogenesis	3/998	10/16374	0.0196081	0.220321	0.196907	LGR4/PDGFRB/HES5	3
GO:0072697	protein localization to cell cortex	3/998	10/16374	0.0196081	0.220321	0.196907	NUMA1/EPB41L2/GPSM2	3
GO:0099068	postsynapse assembly	3/998	10/16374	0.0196081	0.220321	0.196907	LRP4/NTNG2/NLGN3	3
GO:0030038	contractile actin filament bundle assembly	10/998	78/16374	0.0197026	0.220321	0.196907	SDC4/RAPGEF3/DLC1/RGCC/CD47/NRP1/PPFIA1/PIK3R1/SORBS3/SMAD3	10
GO:0090596	sensory organ morphogenesis	10/998	78/16374	0.0197026	0.220321	0.196907	EYA1/ZIC1/FGFR2/BCR/PRRX1/ABR/SOBP/TSHZ1/FZD3/AGTPBP1	10
GO:0061614	pri-miRNA transcription by RNA polymerase II	7/998	46/16374	0.0204129	0.220321	0.196907	SOX9/NFATC4/HIF1A/TGFB2/PPARA/DDX5/SMAD3	7
GO:0072171	mesonephric tubule morphogenesis	7/998	46/16374	0.0204129	0.220321	0.196907	BCL2/EYA1/SOX9/GLI3/FGF2/PTCH1/CTNNBIP1	7
GO:0014812	muscle cell migration	6/998	36/16374	0.02045	0.220321	0.196907	BCL2/PDGFRB/SORL1/NRP1/NDRG4/PPARGC1A	6
GO:1901216	positive regulation of neuron death	6/998	36/16374	0.02045	0.220321	0.196907	MAP3K5/DDIT4/PRNP/CAPN2/PPP1R13B/TP53BP2	6
GO:0001767	establishment of lymphocyte polarity	2/998	4/16374	0.0205035	0.220321	0.196907	GSN/RIPOR2	2
GO:0002154	thyroid hormone mediated signaling pathway	2/998	4/16374	0.0205035	0.220321	0.196907	NCOA1/THRA	2
GO:0002357	defense response to tumor cell	2/998	4/16374	0.0205035	0.220321	0.196907	RBMS3/CASC2	2
GO:0006084	acetyl-CoA metabolic process	2/998	4/16374	0.0205035	0.220321	0.196907	ACACB/FASN	2
GO:0006538	glutamate catabolic process	2/998	4/16374	0.0205035	0.220321	0.196907	GLUL/GLUD1	2
GO:0006741	NADP biosynthetic process	2/998	4/16374	0.0205035	0.220321	0.196907	ME1/IDH2	2
GO:0007621	negative regulation of female receptivity	2/998	4/16374	0.0205035	0.220321	0.196907	PPP1R1B/THRB	2
GO:0010716	negative regulation of extracellular matrix disassembly	2/998	4/16374	0.0205035	0.220321	0.196907	CST3/FAP	2
GO:0018401	peptidyl-proline hydroxylation to 4-hydroxy-L-proline	2/998	4/16374	0.0205035	0.220321	0.196907	EGLN3/EGLN1	2
GO:0019439	aromatic compound catabolic process	2/998	4/16374	0.0205035	0.220321	0.196907	PON2/EPHX1	2
GO:0019518	L-threonine catabolic process to glycine	2/998	4/16374	0.0205035	0.220321	0.196907	RIDA/SDS	2
GO:0021681	cerebellar granular layer development	2/998	4/16374	0.0205035	0.220321	0.196907	SERPINE2/FAIM2	2
GO:0031999	negative regulation of fatty acid beta-oxidation	2/998	4/16374	0.0205035	0.220321	0.196907	PLIN5/ACACB	2
GO:0034316	negative regulation of Arp2/3 complex-mediated actin nucleation	2/998	4/16374	0.0205035	0.220321	0.196907	CTNNA2/HIP1R	2
GO:0035609	C-terminal protein deglutamylation	2/998	4/16374	0.0205035	0.220321	0.196907	AGBL1/AGTPBP1	2
GO:0035947	obsolete regulation of gluconeogenesis by regulation of transcription from RNA polymerase II promoter	2/998	4/16374	0.0205035	0.220321	0.196907	FOXO1/NR1D1	2
GO:0043500	muscle adaptation	2/998	4/16374	0.0205035	0.220321	0.196907	NOL3/FOXO3	2
GO:0051541	elastin metabolic process	2/998	4/16374	0.0205035	0.220321	0.196907	CST3/HIF1A	2
GO:0070779	D-aspartate import across plasma membrane	2/998	4/16374	0.0205035	0.220321	0.196907	SLC1A2/SLC1A3	2
GO:0072170	metanephric tubule development	2/998	4/16374	0.0205035	0.220321	0.196907	LGR4/HES5	2
GO:0097090	presynaptic membrane organization	2/998	4/16374	0.0205035	0.220321	0.196907	LRP4/APOE	2
GO:1902109	negative regulation of mitochondrial membrane permeability involved in apoptotic process	2/998	4/16374	0.0205035	0.220321	0.196907	BNIP3/NOL3	2
GO:1902617	response to fluoride	2/998	4/16374	0.0205035	0.220321	0.196907	FOXO1/ATG7	2
GO:1903278	positive regulation of sodium ion export across plasma membrane	2/998	4/16374	0.0205035	0.220321	0.196907	FXYD1/ATP1B2	2
GO:1904637	cellular response to ionomycin	2/998	4/16374	0.0205035	0.220321	0.196907	NFATC4/PPARGC1A	2
GO:2001013	epithelial cell proliferation involved in renal tubule morphogenesis	2/998	4/16374	0.0205035	0.220321	0.196907	LGR4/MEF2C	2
GO:0007605	sensory perception of sound	15/998	138/16374	0.0210442	0.221303	0.197785	EYA1/SLC1A3/THRB/CDH23/RIPOR2/CDC14A/MBP/GJB6/ALDH7A1/WFS1/MYH14/SLC9A3R1/USP53/MYO6/SOBP	15
GO:0050817	coagulation	15/998	138/16374	0.0210442	0.221303	0.197785	DGKG/GNA14/ARRB1/MERTK/HS3ST5/SERPINE2/GNAQ/ENTPD2/FBLN1/TYRO3/PRKCA/VAV3/PIK3R1/APOE/DGKZ	15
GO:0001779	natural killer cell differentiation	4/998	18/16374	0.0211244	0.221303	0.197785	MERTK/TYRO3/AXL/ZBTB1	4
GO:0035272	exocrine system development	4/998	18/16374	0.0211244	0.221303	0.197785	CST3/SOX9/FGFR2/WLS	4
GO:0043537	negative regulation of blood vessel endothelial cell migration	4/998	18/16374	0.0211244	0.221303	0.197785	RGCC/FGF2/MEF2C/APOE	4
GO:0046463	acylglycerol biosynthetic process	4/998	18/16374	0.0211244	0.221303	0.197785	SREBF1/PLIN5/SLC27A1/SCARB1	4
GO:0046470	phosphatidylcholine metabolic process	4/998	18/16374	0.0211244	0.221303	0.197785	ACSL3/CAPN2/SCARB1/PNPLA6	4
GO:0060307	regulation of ventricular cardiac muscle cell membrane repolarization	4/998	18/16374	0.0211244	0.221303	0.197785	GJA1/ANK2/SNTA1/AKAP9	4
GO:0097186	amelogenesis	4/998	18/16374	0.0211244	0.221303	0.197785	SLC24A4/FOXO1/ITGB4/PPARA	4
GO:1903077	negative regulation of protein localization to plasma membrane	4/998	18/16374	0.0211244	0.221303	0.197785	PPFIA1/TMBIM1/PPP2R5A/NUMB	4
GO:0043433	negative regulation of DNA-binding transcription factor activity	9/998	68/16374	0.0217226	0.227002	0.202878	TCF7L2/WFS1/PRNP/BHLHE40/PTCH1/MED13/EGLN1/CTNNBIP1/SUFU	9
GO:0003148	outflow tract septum morphogenesis	5/998	27/16374	0.0219093	0.227248	0.203098	FGFR2/NRP1/TGFB2/RARB/PARVA	5
GO:0042982	amyloid precursor protein metabolic process	5/998	27/16374	0.0219093	0.227248	0.203098	SPON1/PRNP/TMCC2/ITM2B/APOE	5
GO:0051928	positive regulation of calcium ion transport	5/998	27/16374	0.0219093	0.227248	0.203098	CACNB2/MYLK/ANK2/CAMK2A/WFS1	5
GO:0008542	visual learning	7/998	47/16374	0.022765	0.234957	0.209988	ATP1A2/PPP1R1B/HIF1A/NDRG4/GRIN1/PIAS1/NLGN3	7
GO:0051781	positive regulation of cell division	7/998	47/16374	0.022765	0.234957	0.209988	GAREM1/FGFR2/FGF2/VEGFA/TGFB2/PDGFC/THBS4	7
GO:0042773	ATP synthesis coupled electron transport	10/998	80/16374	0.0231378	0.238153	0.212844	MT-ND1/MT-ND2/MT-CO1/MT-CO2/MT-CO3/MT-ND3/MT-ND4/MT-CYB/MT-ND5/MT-ND4L	10
GO:0003014	renal system process	6/998	37/16374	0.0231886	0.238153	0.212844	AQP1/BCL2/KCNMA1/BCR/AGT/EDNRB	6
GO:0035249	synaptic transmission, glutamatergic	8/998	58/16374	0.0236666	0.241874	0.21617	ATP1A2/GLUL/SLC1A4/SERPINE2/GRIA2/MEF2C/GRIN1/NLGN3	8
GO:0050679	positive regulation of epithelial cell proliferation	8/998	58/16374	0.0236666	0.241874	0.21617	GLUL/STOX1/EYA1/HTRA1/SOX9/TCF7L2/FGFR2/VEGFA	8
GO:0040007	growth	11/998	92/16374	0.0239429	0.243063	0.217233	FGFR3/PLCB1/HEPACAM/MT1X/MT1G/MT1M/MT1E/WFS1/MT1F/MT2A/HIF1A	11
GO:0006464	cellular protein modification process	32/998	365/16374	0.0246851	0.243063	0.217233	ERBB4/EFNA5/NTRK2/CAMTA1/ARRB1/DLC1/CTDSPL/CCND3/SIRPA/TNIK/SOX9/CPE/NSMF/FBLN1/RAMP1/MT3/PRNP/VEGFA/NTRK3/FBXO2/PLOD2/SEMA4D/EDNRB/ITPKB/CD109/ATG7/TERF2IP/CDK9/PPP2R5A/KNDC1/CALM1/PPARGC1A	32
GO:0007595	lactation	7/998	48/16374	0.0252977	0.243063	0.217233	ERBB4/MT-CO2/GJA1/NCOA1/VEGFA/HIF1A/KALRN	7
GO:0045785	positive regulation of cell adhesion	7/998	48/16374	0.0252977	0.243063	0.217233	ZFHX3/FRMD5/PRKCA/VEGFA/VAV3/ITGAV/ADGRG1	7
GO:0007628	adult walking behavior	5/998	28/16374	0.0253728	0.243063	0.217233	EPHA4/ZIC1/KCNJ10/OXR1/NPC1	5
GO:0034205	amyloid-beta formation	5/998	28/16374	0.0253728	0.243063	0.217233	EPHA4/SPON1/SORL1/PRNP/APOE	5
GO:0048854	brain morphogenesis	5/998	28/16374	0.0253728	0.243063	0.217233	CTNNA2/BBS2/AKT3/FOXO3/FZD3	5
GO:0051602	response to electrical stimulus	5/998	28/16374	0.0253728	0.243063	0.217233	MT-CO1/S100A13/GJB6/AKAP9/FZD3	5
GO:0097485	neuron projection guidance	5/998	28/16374	0.0253728	0.243063	0.217233	UNC5C/SEMA3B/EPHA4/NRP1/FZD3	5
GO:0009880	embryonic pattern specification	4/998	19/16374	0.0254984	0.243063	0.217233	ERBB4/FGFR2/ZBTB16/SMAD3	4
GO:0021756	striatum development	4/998	19/16374	0.0254984	0.243063	0.217233	ZSWIM6/BBS2/JAKMIP1/RARB	4
GO:0032332	positive regulation of chondrocyte differentiation	4/998	19/16374	0.0254984	0.243063	0.217233	SOX9/GLI3/ZBTB16/SMAD3	4
GO:0051641	cellular localization	4/998	19/16374	0.0254984	0.243063	0.217233	PARD3/WWC1/NUMA1/APOE	4
GO:0090190	positive regulation of branching involved in ureteric bud morphogenesis	4/998	19/16374	0.0254984	0.243063	0.217233	LGR4/SOX9/AGT/VEGFA	4
GO:0099622	cardiac muscle cell membrane repolarization	4/998	19/16374	0.0254984	0.243063	0.217233	GJA1/ANK2/SNTA1/AKAP9	4
GO:0071704	organic substance metabolic process	11/998	93/16374	0.0257166	0.243063	0.217233	ME1/NCOA1/AGT/PLPP1/NR1D1/SLC27A1/PDK4/NR1D2/FDFT1/PPARA/RXRA	11
GO:0035295	tube development	16/998	154/16374	0.0257189	0.243063	0.217233	BCL2/SREBF1/EYA1/SOX9/FGFR2/GLI3/RIDA/COBL/EMX2/VEGFA/PTCH1/HIF1A/EDNRB/MEF2C/EPAS1/FSTL3	16
GO:0007167	enzyme linked receptor protein signaling pathway	9/998	70/16374	0.0257573	0.243063	0.217233	EFNA5/MAGI2/NRG3/TGFBR3/SPTBN1/TGFB2/PDGFC/FSTL3/SMAD3	9
GO:0006707	cholesterol catabolic process	3/998	11/16374	0.0257601	0.243063	0.217233	MT3/CYP46A1/SCARB1	3
GO:0010884	positive regulation of lipid storage	3/998	11/16374	0.0257601	0.243063	0.217233	PLIN5/ACACB/HILPDA	3
GO:0032060	bleb assembly	3/998	11/16374	0.0257601	0.243063	0.217233	MYLK/PMP22/EMP1	3
GO:0035107	appendage morphogenesis	3/998	11/16374	0.0257601	0.243063	0.217233	PLXNA2/SOX9/FGFR2	3
GO:0042698	ovulation cycle	3/998	11/16374	0.0257601	0.243063	0.217233	GABRB1/TYRO3/AXL	3
GO:0044321	response to leptin	3/998	11/16374	0.0257601	0.243063	0.217233	MT3/NR1D1/LEPR	3
GO:0046839	phospholipid dephosphorylation	3/998	11/16374	0.0257601	0.243063	0.217233	PLPP1/PLPP4/MTMR1	3
GO:0048512	circadian behavior	3/998	11/16374	0.0257601	0.243063	0.217233	ZFHX3/NR1D1/NR1D2	3
GO:0050802	circadian sleep/wake cycle, sleep	3/998	11/16374	0.0257601	0.243063	0.217233	PTGDS/CST3/PER3	3
GO:0060174	limb bud formation	3/998	11/16374	0.0257601	0.243063	0.217233	PLXNA2/SOX9/FGFR2	3
GO:0060221	retinal rod cell differentiation	3/998	11/16374	0.0257601	0.243063	0.217233	NTRK2/RORB/SOX9	3
GO:0071372	cellular response to follicle-stimulating hormone stimulus	3/998	11/16374	0.0257601	0.243063	0.217233	EFNA5/GCLC/PPARGC1A	3
GO:0072080	nephron tubule development	3/998	11/16374	0.0257601	0.243063	0.217233	LGR4/MEF2C/HES5	3
GO:0098712	L-glutamate import across plasma membrane	3/998	11/16374	0.0257601	0.243063	0.217233	ATP1A2/SLC1A2/SLC1A3	3
GO:2001171	positive regulation of ATP biosynthetic process	3/998	11/16374	0.0257601	0.243063	0.217233	MT-CO2/ENO1/PPARGC1A	3
GO:2001223	negative regulation of neuron migration	3/998	11/16374	0.0257601	0.243063	0.217233	ERBB4/NRG3/ADGRG1	3
GO:0006810	transport	13/998	117/16374	0.0258742	0.24359	0.217704	DNM3/WWC1/BCL2/ITSN1/CLDN10/ACSL3/NRP1/VAV3/MYO6/BNIP3/NDRG4/NUMA1/KIF13A	13
GO:0048762	mesenchymal cell differentiation	12/998	105/16374	0.0259646	0.243892	0.217973	BCL2/LDLRAD4/SOX9/FGFR2/RGCC/CRB2/ZNF703/TIAM1/VASN/TGFB2/PHLDB1/SMAD3	12
GO:0008284	positive regulation of cell population proliferation	39/998	464/16374	0.0261016	0.244629	0.218632	ERBB4/HPSE2/NTRK2/ARRB1/STOX1/FGFR3/BCL2/CST3/GAREM1/HSF4/SOX9/S100A13/PTH1R/FGFR2/S100B/TNS3/CTSH/PDGFRB/HILPDA/SSBP3/FGF2/ZNF703/CD47/TIAM1/VEGFA/NTRK3/SLC25A33/TGFB2/EDNRB/NACC2/PDGFC/COPS9/CD81/ITGAV/HES5/IL6ST/E2F3/CNTFR/PURA	39
GO:0014897	striated muscle hypertrophy	6/998	38/16374	0.0261628	0.244654	0.218655	ADRA1A/JARID2/PRKCA/AGT/CDK9/IL6ST	6
GO:0007599	hemostasis	15/998	142/16374	0.0264593	0.246875	0.22064	DGKG/GNA14/ARRB1/MERTK/SERPINE2/GNAQ/ENTPD2/FBLN1/TYRO3/PRKCA/VAV3/PIK3R1/GPI/APOE/DGKZ	15
GO:0018212	peptidyl-tyrosine modification	12/998	106/16374	0.0277195	0.257949	0.230536	EFNA5/CNTN1/LRP4/AGT/PRNP/VEGFA/NRP1/SEMA4D/PDGFC/CD81/TNK2/THBS4	12
GO:0002040	sprouting angiogenesis	9/998	71/16374	0.0279616	0.257949	0.230536	GLUL/S100A1/FGF2/VEGFA/NRP1/PKM/BMPER/PARVA/JAK1	9
GO:0022037	metencephalon development	7/998	49/16374	0.0280164	0.257949	0.230536	CNTN1/CKB/MT-CO1/MT-ND4/NCOA1/FAIM2/PPARGC1A	7
GO:0050853	B cell receptor signaling pathway	7/998	49/16374	0.0280164	0.257949	0.230536	BCL2/CD38/VAV3/NFATC2/MEF2C/CD81/ELF2	7
GO:0060675	ureteric bud morphogenesis	7/998	49/16374	0.0280164	0.257949	0.230536	BCL2/EYA1/SOX9/GLI3/FGF2/PTCH1/CTNNBIP1	7
GO:0071230	cellular response to amino acid stimulus	7/998	49/16374	0.0280164	0.257949	0.230536	CPEB3/NTRK2/COL16A1/NSMF/CPEB4/CAPN2/PDGFC	7
GO:0034330	cell junction organization	8/998	60/16374	0.0284229	0.261116	0.233367	DNM3/SPARCL1/EFNA5/NDRG1/GPM6A/NRP1/NTNG2/PCDH17	8
GO:0071346	cellular response to interferon-gamma	14/998	131/16374	0.0286851	0.262947	0.235003	GSN/CAMK2G/CAMK2B/SIRPA/CAMK2A/AQP4/DAPK1/CDC42EP4/MT2A/TRIM8/CD47/GAPDH/IRF2/JAK1	14
GO:0042472	inner ear morphogenesis	10/998	83/16374	0.0290725	0.264537	0.236424	STOX1/EYA1/ZIC1/SOX9/FGFR2/BCR/PRRX1/ABR/SOBP/FZD3	10
GO:0042775	mitochondrial ATP synthesis coupled electron transport	10/998	83/16374	0.0290725	0.264537	0.236424	MT-ND1/MT-ND2/MT-CO1/MT-CO2/MT-CO3/MT-ND3/MT-ND4/MT-CYB/MT-ND5/MT-ND4L	10
GO:0006812	cation transport	5/998	29/16374	0.0291681	0.264537	0.236424	TRPM3/ATP13A4/ATP13A5/GRIN1/PIEZO1	5
GO:0007566	embryo implantation	6/998	39/16374	0.0293797	0.264537	0.236424	CST3/BSG/FBLN1/PCSK5/ARID1A/RXRA	6
GO:0008152	metabolic process	6/998	39/16374	0.0293797	0.264537	0.236424	ME1/TCF7L2/ACACB/BCR/CAMK1D/FASN	6
GO:0030890	positive regulation of B cell proliferation	6/998	39/16374	0.0293797	0.264537	0.236424	BCL2/CD38/VAV3/NFATC2/MEF2C/CD81	6
GO:0032024	positive regulation of insulin secretion	6/998	39/16374	0.0293797	0.264537	0.236424	GLUL/GJA1/GLUD1/CD38/TCF7L2/PFKFB2	6
GO:0002052	positive regulation of neuroblast proliferation	4/998	20/16374	0.0303768	0.264537	0.236424	GLI3/VEGFA/HIF1A/FZD3	4
GO:0014044	Schwann cell development	4/998	20/16374	0.0303768	0.264537	0.236424	LGI4/PARD3/NTRK2/NTRK3	4
GO:0015012	heparan sulfate proteoglycan biosynthetic process	4/998	20/16374	0.0303768	0.264537	0.236424	CSGALNACT1/HS3ST5/TCF7L2/DSE	4
GO:0030850	prostate gland development	4/998	20/16374	0.0303768	0.264537	0.236424	SOX9/FGFR2/GLI3/PTCH1	4
GO:0042462	eye photoreceptor cell development	4/998	20/16374	0.0303768	0.264537	0.236424	RORB/THRB/VEGFA/CRB1	4
GO:0060537	muscle tissue development	4/998	20/16374	0.0303768	0.264537	0.236424	GJA1/MYLK/SMAD3/PPARGC1A	4
GO:0061003	positive regulation of dendritic spine morphogenesis	4/998	20/16374	0.0303768	0.264537	0.236424	CAMK2B/TIAM1/KALRN/EEF2K	4
GO:0071526	semaphorin-plexin signaling pathway	4/998	20/16374	0.0303768	0.264537	0.236424	PLXNB1/PLXNA2/NRP1/SEMA4D	4
GO:0019915	lipid storage	8/998	61/16374	0.0310323	0.264537	0.236424	PLIN5/OSBPL11/ACACB/HILPDA/ITGAV/PPARA/SCARB1/APOE	8
GO:0042310	vasoconstriction	8/998	61/16374	0.0310323	0.264537	0.236424	ATP1A2/DOCK5/GJA1/ADRA1A/DOCK4/CD38/AGT/EDNRB	8
GO:0097192	extrinsic apoptotic signaling pathway in absence of ligand	8/998	61/16374	0.0310323	0.264537	0.236424	WWOX/BCL2/EYA2/BAG3/SGK3/ITGAV/FOXO3/MKNK2	8
GO:0031589	cell-substrate adhesion	18/998	184/16374	0.0320809	0.264537	0.236424	EFNA5/DOCK5/TTYH1/DLC1/TESK2/BCL2/EPHB1/KANK1/SPOCK1/FBLN1/MINK1/PREX1/NRP1/PRKX/ITGAV/PIK3R1/ABI3BP/SORBS3	18
GO:0009306	protein secretion	25/998	277/16374	0.0321633	0.264537	0.236424	GLUL/LGR4/RAPGEF3/GJA1/SREBF1/GLUD1/CD38/OLFM2/TCF7L2/RGCC/SYTL4/PFKL/PRKCA/SNCG/SLC2A1/SYT9/WLS/TGFB2/ENSA/GAPDH/PFKFB2/GPI/APOE/LMF1/STXBP5L	25
GO:0006537	glutamate biosynthetic process	2/998	5/16374	0.0328012	0.264537	0.236424	SLC1A3/GLUD1	2
GO:0007343	egg activation	2/998	5/16374	0.0328012	0.264537	0.236424	PLCB1/WBP2NL	2
GO:0010632	regulation of epithelial cell migration	2/998	5/16374	0.0328012	0.264537	0.236424	MACF1/ARSB	2
GO:0014889	muscle atrophy	2/998	5/16374	0.0328012	0.264537	0.236424	NOL3/FOXO3	2
GO:0015825	L-serine transport	2/998	5/16374	0.0328012	0.264537	0.236424	SLC1A4/SLC7A10	2
GO:0016576	histone dephosphorylation	2/998	5/16374	0.0328012	0.264537	0.236424	EYA1/EYA2	2
GO:0022898	regulation of transmembrane transporter activity	2/998	5/16374	0.0328012	0.264537	0.236424	GJA1/BCL2	2
GO:0030497	fatty acid elongation	2/998	5/16374	0.0328012	0.264537	0.236424	TECR/HACD3	2
GO:0031325	positive regulation of cellular metabolic process	2/998	5/16374	0.0328012	0.264537	0.236424	ACACB/FASN	2
GO:0032269	negative regulation of cellular protein metabolic process	2/998	5/16374	0.0328012	0.264537	0.236424	EDNRB/APOE	2
GO:0032649	regulation of interferon-gamma production	2/998	5/16374	0.0328012	0.264537	0.236424	SIRPA/CD47	2
GO:0034103	regulation of tissue remodeling	2/998	5/16374	0.0328012	0.264537	0.236424	CST3/THBS4	2
GO:0035610	protein side chain deglutamylation	2/998	5/16374	0.0328012	0.264537	0.236424	AGBL1/AGTPBP1	2
GO:0035694	mitochondrial protein catabolic process	2/998	5/16374	0.0328012	0.264537	0.236424	BNIP3/BNIP3L	2
GO:0045187	regulation of circadian sleep/wake cycle, sleep	2/998	5/16374	0.0328012	0.264537	0.236424	PTGDS/PER3	2
GO:0046486	glycerolipid metabolic process	2/998	5/16374	0.0328012	0.264537	0.236424	DGKG/DGKZ	2
GO:0048625	myoblast fate commitment	2/998	5/16374	0.0328012	0.264537	0.236424	TCF7L2/EPAS1	2
GO:0051147	regulation of muscle cell differentiation	2/998	5/16374	0.0328012	0.264537	0.236424	MEGF10/CDK9	2
GO:0051179	localization	2/998	5/16374	0.0328012	0.264537	0.236424	PARD3/APOE	2
GO:0051823	regulation of synapse structural plasticity	2/998	5/16374	0.0328012	0.264537	0.236424	CTNNA2/CAMK2B	2
GO:0060525	prostate glandular acinus development	2/998	5/16374	0.0328012	0.264537	0.236424	FGFR2/RXRA	2
GO:0071315	cellular response to morphine	2/998	5/16374	0.0328012	0.264537	0.236424	ADCY8/ATG7	2
GO:0090286	obsolete cytoskeletal anchoring at nuclear membrane	2/998	5/16374	0.0328012	0.264537	0.236424	SYNE1/SUN2	2
GO:0097350	neutrophil clearance	2/998	5/16374	0.0328012	0.264537	0.236424	MERTK/AXL	2
GO:1901388	regulation of transforming growth factor beta activation	2/998	5/16374	0.0328012	0.264537	0.236424	ITGB8/ITGAV	2
GO:1901843	positive regulation of high voltage-gated calcium channel activity	2/998	5/16374	0.0328012	0.264537	0.236424	CACNB2/NIPSNAP2	2
GO:1902083	negative regulation of peptidyl-cysteine S-nitrosylation	2/998	5/16374	0.0328012	0.264537	0.236424	SNTA1/OXR1	2
GO:1903298	negative regulation of hypoxia-induced intrinsic apoptotic signaling pathway	2/998	5/16374	0.0328012	0.264537	0.236424	ENO1/NOL3	2
GO:1903401	L-lysine transmembrane transport	2/998	5/16374	0.0328012	0.264537	0.236424	SLC7A2/SLC25A29	2
GO:1905064	negative regulation of vascular smooth muscle cell differentiation	2/998	5/16374	0.0328012	0.264537	0.236424	NFATC1/NFATC2	2
GO:1905832	positive regulation of spindle assembly	2/998	5/16374	0.0328012	0.264537	0.236424	NUMA1/GPSM2	2
GO:2000809	positive regulation of synaptic vesicle clustering	2/998	5/16374	0.0328012	0.264537	0.236424	MAGI2/NLGN3	2
GO:0006069	ethanol oxidation	3/998	12/16374	0.0328218	0.264537	0.236424	ACSS1/ALDH1A1/ALDH2	3
GO:0006390	mitochondrial transcription	3/998	12/16374	0.0328218	0.264537	0.236424	MTERF1/SLC25A33/FOXO3	3
GO:0007171	activation of transmembrane receptor protein tyrosine kinase activity	3/998	12/16374	0.0328218	0.264537	0.236424	EFNA5/NRG3/PDGFC	3
GO:0042596	fear response	3/998	12/16374	0.0328218	0.264537	0.236424	GJA1/MEF2C/APOE	3
GO:0043931	ossification involved in bone maturation	3/998	12/16374	0.0328218	0.264537	0.236424	PLXNB1/SEMA4D/RYR1	3
GO:0046475	glycerophospholipid catabolic process	3/998	12/16374	0.0328218	0.264537	0.236424	PRDX6/SCARB1/PNPLA6	3
GO:0046626	regulation of insulin receptor signaling pathway	3/998	12/16374	0.0328218	0.264537	0.236424	CCND3/PIK3R1/NUCKS1	3
GO:0050927	positive regulation of positive chemotaxis	3/998	12/16374	0.0328218	0.264537	0.236424	VEGFA/NTRK3/SMAD3	3
GO:0051481	negative regulation of cytosolic calcium ion concentration	3/998	12/16374	0.0328218	0.264537	0.236424	ATP1A2/RYR3/SMAD3	3
GO:0051642	centrosome localization	3/998	12/16374	0.0328218	0.264537	0.236424	PLXNA2/NIN/SUN2	3
GO:0014047	glutamate secretion	6/998	40/16374	0.0328456	0.264537	0.236424	SLC1A2/NTRK2/SLC1A3/TSPOAP1/PPFIA1/SLC17A7	6
GO:0007202	activation of phospholipase C activity	5/998	30/16374	0.0333032	0.266681	0.238341	NTRK2/ADRA1A/GNAQ/AGT/ADCYAP1R1	5
GO:0030513	positive regulation of BMP signaling pathway	5/998	30/16374	0.0333032	0.266681	0.238341	NEO1/CRB2/NUMA1/HES5/ZNF423	5
GO:0045010	actin nucleation	5/998	30/16374	0.0333032	0.266681	0.238341	GSN/CTNNA2/HIP1R/LMOD1/FCHSD2	5
GO:0048608	reproductive structure development	12/998	109/16374	0.0334994	0.267609	0.23917	ARRB1/SERPINE2/FGFR2/NCOA1/TTPA/ITGB8/HIF1A/ARID1A/FOXO3/EPAS1/GAS2/RXRA	12
GO:0006367	transcription initiation from RNA polymerase II promoter	17/998	172/16374	0.0335472	0.267609	0.23917	RORA/RORB/THRB/SOX9/NR6A1/NR1D1/CDK9/ZNF451/NR1D2/RARB/PPARA/E2F3/RXRA/MED13/THRA/CTNNBIP1/PPARGC1A	17
GO:0001656	metanephros development	7/998	51/16374	0.0340326	0.270449	0.241709	LGR4/BCL2/EYA1/GLI3/CTSH/PDGFRB/PTCH1	7
GO:0051496	positive regulation of stress fiber assembly	7/998	51/16374	0.0340326	0.270449	0.241709	SDC4/RAPGEF3/RGCC/CD47/NRP1/SORBS3/SMAD3	7
GO:0007267	cell-cell signaling	33/998	389/16374	0.0342827	0.27192	0.243023	WWOX/NDRG2/GJA1/APCDD1/ZNRF3/FGFR3/ADRA1A/DKK3/WIF1/MERTK/AMER2/SEMA3B/CTNND2/LRP4/TNIK/RNF43/APC2/CPE/FGFR2/KREMEN1/MACF1/DAAM2/AGT/NUDT3/NRP1/CRB1/SLC9A3R1/ADRA1B/WLS/PCSK5/TMEM170B/ADGRG1/CTNNBIP1	33
GO:0031647	regulation of protein stability	9/998	74/16374	0.0353625	0.279953	0.250202	ASPH/BCL2/SREBF1/ANK2/FAM107A/TF/CD81/USP3/FBXO7	9
GO:0061564	axon development	12/998	110/16374	0.0356041	0.279976	0.250223	PARD3/BCL2/CTNNA2/EPHA4/FGFR2/S100B/KREMEN1/SEMA4A/NRP1/KLF7/NTNG2/NUMB	12
GO:0006970	response to osmotic stress	4/998	21/16374	0.0357673	0.279976	0.250223	MAP7/NFAT5/KCNMA1/LRRC8A	4
GO:0031290	retinal ganglion cell axon guidance	4/998	21/16374	0.0357673	0.279976	0.250223	EFNA5/EPHB1/VEGFA/NRP1	4
GO:0055006	cardiac cell development	4/998	21/16374	0.0357673	0.279976	0.250223	ADRA1A/PDGFRB/PDLIM5/AGT	4
GO:0086004	regulation of cardiac muscle cell contraction	4/998	21/16374	0.0357673	0.279976	0.250223	ATP1A2/PDE4D/ANK2/AKAP9	4
GO:0086009	membrane repolarization	4/998	21/16374	0.0357673	0.279976	0.250223	ATP1A2/ATP1B2/KCND3/AKAP9	4
GO:0019216	regulation of lipid metabolic process	10/998	86/16374	0.036013	0.280848	0.251002	ME1/NCOA1/AGT/PLPP1/NR1D1/SLC27A1/NR1D2/FDFT1/PPARA/RXRA	10
GO:0060041	retina development in camera-type eye	10/998	86/16374	0.036013	0.280848	0.251002	NTRK2/MERTK/RORB/GPM6A/SOX9/PDGFRB/HIF1A/TGFB2/SLC17A7/MAN2A1	10
GO:0017038	protein import	8/998	63/16374	0.0367327	0.28536	0.255035	ZIC1/GLI3/BAG3/PIK3R1/SMAD3/PKIA/APOE/SUFU	8
GO:0090090	negative regulation of canonical Wnt signaling pathway	16/998	161/16374	0.0367649	0.28536	0.255035	ZNRF3/DKK3/AMER2/LRP4/RBMS3/SOX9/TCF7L2/APC2/FOXO1/GLI3/KREMEN1/PSMA1/SLC9A3R1/FOXO3/TMEM170B/APOE	16
GO:0098609	cell-cell adhesion	18/998	187/16374	0.0367964	0.28536	0.255035	EFNA5/TENM2/TTYH1/BCL2/CTNNA2/SOX9/MBP/RGCC/STXBP6/PDLIM5/CDH10/MINK1/ZNF703/CD47/FSTL3/PPARA/PIEZO1/ELMO2	18
GO:0030534	adult behavior	5/998	31/16374	0.0377846	0.29194	0.260915	SLC1A2/ALK/BBS2/NLGN3/PCDH17	5
GO:0060485	mesenchyme development	5/998	31/16374	0.0377846	0.29194	0.260915	SOX9/FGFR2/TGFB2/BNC2/SMAD3	5
GO:0051403	stress-activated MAPK cascade	19/998	202/16374	0.0398454	0.303315	0.271082	TPD52L1/MAP3K5/MAPK10/PLCB1/SASH1/EPHB1/SIRPA/TNIK/FOXO1/MINK1/AGT/VEGFA/TGFB2/PER1/PHLPP1/MAP3K3/MAPK11/RELL1/HACD3	19
GO:0006754	ATP biosynthetic process	6/998	42/16374	0.0405458	0.303315	0.271082	MT-CO2/MT-ATP6/ENO1/PKM/ATP5F1C/PPARGC1A	6
GO:0000038	very long-chain fatty acid metabolic process	3/998	13/16374	0.0407807	0.303315	0.271082	ACSBG1/ABCD2/PEX2	3
GO:0003179	heart valve morphogenesis	3/998	13/16374	0.0407807	0.303315	0.271082	SOX9/TGFB2/FGFRL1	3
GO:0006883	cellular sodium ion homeostasis	3/998	13/16374	0.0407807	0.303315	0.271082	ATP1A2/ATP1B2/AGT	3
GO:0010863	positive regulation of phospholipase C activity	3/998	13/16374	0.0407807	0.303315	0.271082	PDGFRB/FGF2/NTRK3	3
GO:0014067	negative regulation of phosphatidylinositol 3-kinase signaling	3/998	13/16374	0.0407807	0.303315	0.271082	SERPINE2/SLC9A3R1/PIK3IP1	3
GO:0015909	long-chain fatty acid transport	3/998	13/16374	0.0407807	0.303315	0.271082	LCN12/SLC27A1/APOE	3
GO:0030201	heparan sulfate proteoglycan metabolic process	3/998	13/16374	0.0407807	0.303315	0.271082	CSGALNACT1/HS3ST5/TCF7L2	3
GO:0042490	mechanoreceptor differentiation	3/998	13/16374	0.0407807	0.303315	0.271082	NTRK2/NTRK3/HES5	3
GO:0045778	positive regulation of ossification	3/998	13/16374	0.0407807	0.303315	0.271082	ZBTB16/TGFB2/TOB2	3
GO:0045820	negative regulation of glycolytic process	3/998	13/16374	0.0407807	0.303315	0.271082	DDIT4/PPARA/PPARGC1A	3
GO:0050678	regulation of epithelial cell proliferation	3/998	13/16374	0.0407807	0.303315	0.271082	EDNRB/HES5/SMAD3	3
GO:0060044	negative regulation of cardiac muscle cell proliferation	3/998	13/16374	0.0407807	0.303315	0.271082	GJA1/JARID2/MAPK11	3
GO:0060644	mammary gland epithelial cell differentiation	3/998	13/16374	0.0407807	0.303315	0.271082	ERBB4/ZNF703/PTCH1	3
GO:0090407	organophosphate biosynthetic process	3/998	13/16374	0.0407807	0.303315	0.271082	PTH1R/ADCYAP1R1/SLC27A1	3
GO:0097067	cellular response to thyroid hormone stimulus	3/998	13/16374	0.0407807	0.303315	0.271082	CTSH/KLF9/PPARGC1A	3
GO:0097479	synaptic vesicle localization	3/998	13/16374	0.0407807	0.303315	0.271082	MAGI2/NLGN3/PCDH17	3
GO:1900025	negative regulation of substrate adhesion-dependent cell spreading	3/998	13/16374	0.0407807	0.303315	0.271082	EFNA5/KANK1/FBLN1	3
GO:1902894	negative regulation of pri-miRNA transcription by RNA polymerase II	3/998	13/16374	0.0407807	0.303315	0.271082	SOX9/NFATC4/PPARA	3
GO:1903204	negative regulation of oxidative stress-induced neuron death	3/998	13/16374	0.0407807	0.303315	0.271082	ATG7/OXR1/FBXO7	3
GO:1903409	reactive oxygen species biosynthetic process	10/998	88/16374	0.0412327	0.306132	0.2736	MT-CO2/SIRPA/AGT/ABCD2/CD47/DDAH1/SLC25A33/FOXO3/GRIN1/SMAD3	10
GO:0001754	eye photoreceptor cell differentiation	4/998	22/16374	0.041674	0.306146	0.273612	RORB/VEGFA/CRB1/AGTPBP1	4
GO:0010975	regulation of neuron projection development	4/998	22/16374	0.041674	0.306146	0.273612	SLC39A12/CTNNA2/FBXO7/ACAP3	4
GO:0031639	plasminogen activation	4/998	22/16374	0.041674	0.306146	0.273612	KLKB1/SERPINE2/ENO1/PGK1	4
GO:0035909	aorta morphogenesis	4/998	22/16374	0.041674	0.306146	0.273612	EYA1/MYLK/PDGFRB/TGFB2	4
GO:0060999	positive regulation of dendritic spine development	4/998	22/16374	0.041674	0.306146	0.273612	CPEB3/ITSN1/CDKL5/APOE	4
GO:1904738	vascular associated smooth muscle cell migration	4/998	22/16374	0.041674	0.306146	0.273612	DOCK5/DOCK4/AGT/MEF2C	4
GO:0001935	endothelial cell proliferation	12/998	113/16374	0.0424775	0.311502	0.278398	GJA1/RGCC/FGF2/PRKCA/AKT3/VEGFA/NRP1/HIF1A/PRKX/SCARB1/APOE/THBS4	12
GO:0050435	amyloid-beta metabolic process	5/998	32/16374	0.0426172	0.311979	0.278825	EPHA4/SPON1/SORL1/PRNP/APOE	5
GO:0006090	pyruvate metabolic process	11/998	101/16374	0.0434513	0.317529	0.283785	ME1/DDIT4/BSG/PDK4/HIF1A/PFKFB3/HAGH/PPARA/LDHB/PFKFB2/PPARGC1A	11
GO:0002042	cell migration involved in sprouting angiogenesis	7/998	54/16374	0.0445688	0.32456	0.290069	STARD13/FGF2/AKT3/VEGFA/NRP1/MAP3K3/HDAC7	7
GO:0007043	cell-cell junction assembly	7/998	54/16374	0.0445688	0.32456	0.290069	PARD3/MICALL2/AGT/TJP1/HDAC7/FRMPD2/PATJ	7
GO:1902653	secondary alcohol biosynthetic process	6/998	43/16374	0.0447891	0.325597	0.290996	SREBF1/GPAM/ACACB/FDFT1/FASN/APOE	6
GO:0070887	cellular response to chemical stimulus	14/998	140/16374	0.0464375	0.326911	0.29217	UNC5C/RORA/DOCK4/SEMA3B/EPHB1/CYP2J2/CYB5B/PDGFRB/NCOA1/EPHX1/CYP46A1/MGST1/SULT1A1/ELMO2	14
GO:0007423	sensory organ development	8/998	66/16374	0.0465374	0.326911	0.29217	STOX1/EYA1/GJB6/GLI3/PDGFRB/FREM2/TGFB2/BMPER	8
GO:0030512	negative regulation of transforming growth factor beta receptor signaling pathway	8/998	66/16374	0.0465374	0.326911	0.29217	HTRA1/LDLRAD4/TGFBR3/PRDM16/VASN/CD109/ZNF451/SMAD3	8
GO:0009058	biosynthetic process	9/998	78/16374	0.0471777	0.326911	0.29217	ALDH1L1/RGCC/PDGFRB/ABCD2/HIF1A/SLC25A33/ERRFI1/FOXO3/GRIN1	9
GO:0010694	positive regulation of alkaline phosphatase activity	2/998	6/16374	0.0472379	0.326911	0.29217	MEF2C/SMAD3	2
GO:0010817	regulation of hormone levels	2/998	6/16374	0.0472379	0.326911	0.29217	TCF7L2/BCAT2	2
GO:0014719	skeletal muscle satellite cell activation	2/998	6/16374	0.0472379	0.326911	0.29217	EPHB1/MEGF10	2
GO:0021861	forebrain radial glial cell differentiation	2/998	6/16374	0.0472379	0.326911	0.29217	GLI3/HES5	2
GO:0031547	brain-derived neurotrophic factor receptor signaling pathway	2/998	6/16374	0.0472379	0.326911	0.29217	NTRK2/NFATC4	2
GO:0042866	pyruvate biosynthetic process	2/998	6/16374	0.0472379	0.326911	0.29217	SDS/PKM	2
GO:0043619	regulation of transcription from RNA polymerase II promoter in response to oxidative stress	2/998	6/16374	0.0472379	0.326911	0.29217	HIF1A/EPAS1	2
GO:0044794	positive regulation by host of viral process	2/998	6/16374	0.0472379	0.326911	0.29217	PC/APOE	2
GO:0045428	regulation of nitric oxide biosynthetic process	2/998	6/16374	0.0472379	0.326911	0.29217	SIRPA/CD47	2
GO:0046321	positive regulation of fatty acid oxidation	2/998	6/16374	0.0472379	0.326911	0.29217	PPARA/PPARGC1A	2
GO:0046850	regulation of bone remodeling	2/998	6/16374	0.0472379	0.326911	0.29217	GJA1/LEPR	2
GO:0051152	positive regulation of smooth muscle cell differentiation	2/998	6/16374	0.0472379	0.326911	0.29217	OLFM2/PIAS1	2
GO:0051661	maintenance of centrosome location	2/998	6/16374	0.0472379	0.326911	0.29217	AKAP9/GPSM2	2
GO:0051938	L-glutamate import	2/998	6/16374	0.0472379	0.326911	0.29217	SLC1A3/SLC17A7	2
GO:0060592	mammary gland formation	2/998	6/16374	0.0472379	0.326911	0.29217	NRG3/FGFR2	2
GO:0060729	intestinal epithelial structure maintenance	2/998	6/16374	0.0472379	0.326911	0.29217	SOX9/SLC22A5	2
GO:0061299	retina vasculature morphogenesis in camera-type eye	2/998	6/16374	0.0472379	0.326911	0.29217	NRP1/NDP	2
GO:0061333	renal tubule morphogenesis	2/998	6/16374	0.0472379	0.326911	0.29217	LGR4/MEF2C	2
GO:0061419	positive regulation of transcription from RNA polymerase II promoter in response to hypoxia	2/998	6/16374	0.0472379	0.326911	0.29217	VEGFA/HIF1A	2
GO:0070120	ciliary neurotrophic factor-mediated signaling pathway	2/998	6/16374	0.0472379	0.326911	0.29217	IL6ST/CNTFR	2
GO:0072675	osteoclast fusion	2/998	6/16374	0.0472379	0.326911	0.29217	CD109/CD81	2
GO:1905274	regulation of modification of postsynaptic actin cytoskeleton	2/998	6/16374	0.0472379	0.326911	0.29217	ITSN1/TIAM1	2
GO:2000323	negative regulation of glucocorticoid receptor signaling pathway	2/998	6/16374	0.0472379	0.326911	0.29217	PER1/CRY2	2
GO:2000675	negative regulation of type B pancreatic cell apoptotic process	2/998	6/16374	0.0472379	0.326911	0.29217	TCF7L2/WFS1	2
GO:2001054	negative regulation of mesenchymal cell apoptotic process	2/998	6/16374	0.0472379	0.326911	0.29217	SOX9/HIF1A	2
GO:0007009	plasma membrane organization	5/998	33/16374	0.0478046	0.327439	0.292642	ANK2/SYTL4/MTSS1L/SPTBN1/CRB1	5
GO:0016125	sterol metabolic process	5/998	33/16374	0.0478046	0.327439	0.292642	CYP46A1/CYP4V2/ACADVL/APOE/LMF1	5
GO:0045540	regulation of cholesterol biosynthetic process	5/998	33/16374	0.0478046	0.327439	0.292642	SREBF1/GPAM/ACACB/FDFT1/FASN	5
GO:0048566	embryonic digestive tract development	5/998	33/16374	0.0478046	0.327439	0.292642	FGFR2/GLI3/TGFB2/PCSK5/RARB	5
GO:0097194	execution phase of apoptosis	5/998	33/16374	0.0478046	0.327439	0.292642	DLC1/AIFM3/FAP/TP53BP2/FZD3	5
GO:0006700	C21-steroid hormone biosynthetic process	4/998	23/16374	0.0480975	0.327439	0.292642	DKK3/TSPOAP1/STARD3/PPARGC1A	4
GO:0030195	negative regulation of blood coagulation	4/998	23/16374	0.0480975	0.327439	0.292642	KLKB1/SERPINE2/FAP/APOE	4
GO:0032800	receptor biosynthetic process	4/998	23/16374	0.0480975	0.327439	0.292642	NR1D1/HIF1A/ITGAV/PPARA	4
GO:0048665	neuron fate specification	4/998	23/16374	0.0480975	0.327439	0.292642	EYA1/GLI3/NTRK3/SUFU	4
GO:0061138	morphogenesis of a branching epithelium	4/998	23/16374	0.0480975	0.327439	0.292642	SOX9/FGFR2/NRP1/RXRA	4
GO:0001505	regulation of neurotransmitter levels	6/998	44/16374	0.049299	0.328667	0.293739	GABRA2/CAMK2A/SNCG/MEF2C/RHOT1/SYT11	6
GO:0000302	response to reactive oxygen species	3/998	14/16374	0.0496145	0.328667	0.293739	SESN1/APOE/PPARGC1A	3
GO:0001771	immunological synapse formation	3/998	14/16374	0.0496145	0.328667	0.293739	EPHB1/CD81/NCK2	3
GO:0009152	purine ribonucleotide biosynthetic process	3/998	14/16374	0.0496145	0.328667	0.293739	MT-CO2/ENO1/PPARGC1A	3
GO:0009206	purine ribonucleoside triphosphate biosynthetic process	3/998	14/16374	0.0496145	0.328667	0.293739	MT-CO2/ENO1/PPARGC1A	3
GO:0021545	cranial nerve development	3/998	14/16374	0.0496145	0.328667	0.293739	SLC1A3/EPHB1/GLI3	3
GO:0030207	chondroitin sulfate catabolic process	3/998	14/16374	0.0496145	0.328667	0.293739	NCAN/IDS/ARSB	3
GO:0032469	endoplasmic reticulum calcium ion homeostasis	3/998	14/16374	0.0496145	0.328667	0.293739	BCL2/WFS1/GRINA	3
GO:0032516	positive regulation of phosphoprotein phosphatase activity	3/998	14/16374	0.0496145	0.328667	0.293739	MAGI2/PDGFRB/CALM1	3
GO:0042181	ketone biosynthetic process	3/998	14/16374	0.0496145	0.328667	0.293739	DKK3/SIRT5/PPARGC1A	3
GO:0045198	establishment of epithelial cell apical/basal polarity	3/998	14/16374	0.0496145	0.328667	0.293739	LAMA1/SLC9A3R1/MYO9A	3
GO:0046688	response to copper ion	3/998	14/16374	0.0496145	0.328667	0.293739	MT-CO1/MT-CYB/S100A13	3
GO:0055012	ventricular cardiac muscle cell differentiation	3/998	14/16374	0.0496145	0.328667	0.293739	MEF2C/RARB/RXRA	3
GO:0060831	smoothened signaling pathway involved in dorsal/ventral neural tube patterning	3/998	14/16374	0.0496145	0.328667	0.293739	GLI3/PTCH1/SUFU	3
GO:0071625	vocalization behavior	3/998	14/16374	0.0496145	0.328667	0.293739	BRINP1/MYH14/NLGN3	3
GO:0090181	regulation of cholesterol metabolic process	3/998	14/16374	0.0496145	0.328667	0.293739	ACADVL/APOE/LMF1	3
GO:1900006	positive regulation of dendrite development	3/998	14/16374	0.0496145	0.328667	0.293739	ALK/COBL/TMEM106B	3
GO:0070301	cellular response to hydrogen peroxide	8/998	67/16374	0.0501513	0.331651	0.296407	MAP3K5/AQP1/CST3/SIRPA/FOXO1/RHOB/BNIP3/AXL	8
GO:0046718	viral entry into host cell	12/998	116/16374	0.0502238	0.331651	0.296407	GSN/HS3ST5/TYRO3/TRIM8/EPS15/CDHR3/CD81/ITGAV/SCARB1/IFITM3/AXL/NPC1	12
GO:0001649	osteoblast differentiation	19/998	208/16374	0.05094	0.335371	0.299731	RANBP3L/WWOX/LGR4/GJA1/RORB/PTH1R/FGFR2/GLI3/ZHX3/SEMA4D/PTCH1/MEF2C/IL6ST/FASN/DDX5/HDAC7/SMAD3/CTNNBIP1/SUFU	19
GO:0007224	smoothened signaling pathway	13/998	129/16374	0.0509476	0.335371	0.299731	RORA/GPR37L1/ZIC1/SERPINE2/FGFR2/GLI3/PRRX1/FBXL17/BOC/PTCH1/HES5/RAB34/SUFU	13
GO:0071407	cellular response to organic cyclic compound	11/998	104/16374	0.0518617	0.340852	0.304629	RORA/RORB/THRB/NR6A1/NR1D1/NR1D2/RARB/ABHD2/PPARA/RXRA/THRA	11
GO:0030301	cholesterol transport	7/998	56/16374	0.0526411	0.345432	0.308722	GRAMD1C/STARD3/PTCH1/ABCA2/SCP2/APOE/NPC1	7
GO:0005975	carbohydrate metabolic process	12/998	117/16374	0.0530066	0.346741	0.309893	NPL/ME1/AMY2B/CHST6/FUT9/ALDH2/GALNT7/IDH2/LDHB/ST3GAL5/MYORG/GPI	12
GO:0006979	response to oxidative stress	12/998	117/16374	0.0530066	0.346741	0.309893	MT-CO1/MT-ND3/STOX1/PON2/PRNP/HIF1A/RBPMS/SESN1/PRDX6/OXR1/GCLC/EPAS1	12
GO:0045165	cell fate commitment	10/998	92/16374	0.0531722	0.346809	0.309953	ERBB4/RORA/EYA1/SOX9/FGFR2/PRRX1/NTRK3/PTCH1/MEF2C/MITF	10
GO:0010573	vascular endothelial growth factor production	5/998	34/16374	0.0533488	0.346809	0.309953	RORA/NDRG2/HIF1A/IL6ST/ADGRG1	5
GO:0042987	amyloid precursor protein catabolic process	5/998	34/16374	0.0533488	0.346809	0.309953	EPHA4/SPON1/SORL1/PRNP/APOE	5
GO:0097009	energy homeostasis	5/998	34/16374	0.0533488	0.346809	0.309953	FOXO1/ACACB/NR1D2/LEPR/PPARGC1A	5
GO:0021782	glial cell development	6/998	45/16374	0.054078	0.350459	0.313216	LGI4/PARD3/NTRK2/KCNJ10/NTRK3/HES5	6
GO:0036473	cell death in response to oxidative stress	6/998	45/16374	0.054078	0.350459	0.313216	MAP3K5/BCL2/GPR37L1/ATG7/OXR1/FBXO7	6
GO:0030336	negative regulation of cell migration	11/998	105/16374	0.0548922	0.352835	0.315339	DLC1/BCL2/MAGI2/KANK1/LDLRAD4/RHOB/SLC9A3R1/MITF/FOXO3/ABHD2/TCAF1	11
GO:0002053	positive regulation of mesenchymal cell proliferation	4/998	24/16374	0.0550355	0.352835	0.315339	SOX9/FGFR2/PRRX1/VEGFA	4
GO:0014808	release of sequestered calcium ion into cytosol by sarcoplasmic reticulum	4/998	24/16374	0.0550355	0.352835	0.315339	PDE4D/NOL3/RYR1/CALM1	4
GO:0032958	inositol phosphate biosynthetic process	4/998	24/16374	0.0550355	0.352835	0.315339	PTH1R/FGF2/ADCYAP1R1/ITPKB	4
GO:0042311	vasodilation	4/998	24/16374	0.0550355	0.352835	0.315339	BBS2/AGT/EDNRB/APOE	4
GO:0060119	inner ear receptor cell development	4/998	24/16374	0.0550355	0.352835	0.315339	SDC4/CDH23/HES5/TRIP11	4
GO:0061383	trabecula morphogenesis	4/998	24/16374	0.0550355	0.352835	0.315339	PLXNB1/TGFBR3/SEMA4D/EGLN1	4
GO:0007507	heart development	23/998	265/16374	0.0556422	0.356178	0.318327	ERBB4/FLRT2/GJA1/DLC1/SOX9/TGFBR3/GLI3/NFATC4/VEGFA/NTRK3/PTCH1/FREM2/TGFB2/PCSK5/MEF2C/ARID1A/NDRG4/TFDP2/CDKL1/PPARA/SMAD3/GYS1/SUFU	23
GO:0006813	potassium ion transport	12/998	118/16374	0.0558919	0.35723	0.319267	ATP1A2/AQP1/FXYD1/ANK2/SLC24A4/KCNMA1/KCNA2/KCNJ10/PRNP/KCND3/KCNIP4/DPP10	12
GO:0045786	negative regulation of cell cycle	10/998	93/16374	0.0564802	0.357766	0.319746	RPS6KA2/BRINP1/RGCC/FAP/RHOB/SLC25A33/CDK9/PPP1R13B/TP53BP2/CAMK2N1	10
GO:0071805	potassium ion transmembrane transport	10/998	93/16374	0.0564802	0.357766	0.319746	AQP1/SLC1A3/ATP1B2/KCNQ3/NALCN/KCNMA1/KCNA2/PRNP/KCNIP4/DPP10	10
GO:0006939	smooth muscle contraction	7/998	57/16374	0.0569993	0.357766	0.319746	ATP1A2/DOCK5/ADRA1A/PDE4D/DOCK4/MYLK/SMTN	7
GO:0007193	adenylate cyclase-inhibiting G protein-coupled receptor signaling pathway	7/998	57/16374	0.0569993	0.357766	0.319746	ADCY2/GPR37L1/GABBR1/PALM/ADCY8/ADCY3/ADCY9	7
GO:0060562	epithelial tube morphogenesis	7/998	57/16374	0.0569993	0.357766	0.319746	LGR4/STOX1/SOX9/FGFR2/VEGFA/PRKX/MEF2C	7
GO:0045444	fat cell differentiation	17/998	184/16374	0.057151	0.357766	0.319746	RORA/PLCB1/WIF1/SREBF1/LMO3/BBS2/OSBPL11/TCF7L2/FOXO1/ZBTB16/ADIRF/RUNX1T1/PRDM16/NR1D1/ZBTB7C/PIAS1/SMAD3	17
GO:0006661	phosphatidylinositol biosynthetic process	11/998	106/16374	0.0580385	0.357766	0.319746	CDS1/INPP4B/PIP4K2A/FGF2/PIGZ/SLC27A1/MTM1/PIP5K1B/PIK3R1/MTMR1/INPPL1	11
GO:0034329	cell junction assembly	11/998	106/16374	0.0580385	0.357766	0.319746	EFNA5/FLRT2/NTRK2/EPHB1/PDLIM5/NTRK3/MEF2C/GRIN1/MYO9A/EEF2K/NLGN3	11
GO:0099643	signal release from synapse	11/998	106/16374	0.0580385	0.357766	0.319746	ADRA1A/CAMK2A/SNCG/CADPS2/SYT9/MEF2C/RHOT1/GIT1/ERC2/SYT11/STXBP5L	11
GO:0006024	glycosaminoglycan biosynthetic process	6/998	46/16374	0.0591278	0.357766	0.319746	SDC4/HS3ST5/GPC5/PDGFRB/SDC2/GPC1	6
GO:0016126	sterol biosynthetic process	6/998	46/16374	0.0591278	0.357766	0.319746	SREBF1/GPAM/ACACB/FDFT1/FASN/APOE	6
GO:0034260	negative regulation of GTPase activity	6/998	46/16374	0.0591278	0.357766	0.319746	ARRB1/BCAS3/CPEB2/AMOT/GPS1/TNK2	6
GO:0046849	bone remodeling	6/998	46/16374	0.0591278	0.357766	0.319746	LGR4/GJA1/PTH1R/NCDN/MITF/LEPR	6
GO:0006605	protein targeting	13/998	132/16374	0.0591831	0.357766	0.319746	MICALL2/SREBF1/TRAK1/RHOU/ABLIM3/FUT10/SORL1/PRNP/BAG3/STOM/BNIP3L/TCAF1/SYNGR1	13
GO:0035094	response to nicotine	5/998	35/16374	0.0592504	0.357766	0.319746	ATP1A2/MT-ND4/PPP1R1B/BCL2/PPARA	5
GO:0072583	clathrin-dependent endocytosis	5/998	35/16374	0.0592504	0.357766	0.319746	HIP1R/DNAJC6/FCHSD2/TNK2/SYT11	5
GO:2001237	negative regulation of extrinsic apoptotic signaling pathway	5/998	35/16374	0.0592504	0.357766	0.319746	TCF7L2/NRP1/NOL3/ITGAV/GCLC	5
GO:0001504	neurotransmitter uptake	3/998	15/16374	0.0592939	0.357766	0.319746	ATP1A2/GLUL/SLC1A3	3
GO:0002320	lymphoid progenitor cell differentiation	3/998	15/16374	0.0592939	0.357766	0.319746	BCL2/HES5/ZBTB1	3
GO:0003170	heart valve development	3/998	15/16374	0.0592939	0.357766	0.319746	SOX9/TGFB2/FGFRL1	3
GO:0006103	2-oxoglutarate metabolic process	3/998	15/16374	0.0592939	0.357766	0.319746	GPT2/IDH2/ADHFE1	3
GO:0010717	regulation of epithelial to mesenchymal transition	3/998	15/16374	0.0592939	0.357766	0.319746	TCF7L2/TIAM1/PHLDB1	3
GO:0030730	sequestering of triglyceride	3/998	15/16374	0.0592939	0.357766	0.319746	PLIN5/OSBPL11/PPARA	3
GO:0030949	positive regulation of vascular endothelial growth factor receptor signaling pathway	3/998	15/16374	0.0592939	0.357766	0.319746	MT3/VEGFA/HIF1A	3
GO:0046464	acylglycerol catabolic process	3/998	15/16374	0.0592939	0.357766	0.319746	PLIN5/MGLL/ABHD2	3
GO:0050651	dermatan sulfate proteoglycan biosynthetic process	3/998	15/16374	0.0592939	0.357766	0.319746	CSGALNACT1/NCAN/DSE	3
GO:0071280	cellular response to copper ion	3/998	15/16374	0.0592939	0.357766	0.319746	AQP1/MT1G/PRNP	3
GO:1901741	positive regulation of myoblast fusion	3/998	15/16374	0.0592939	0.357766	0.319746	RIPOR2/NFATC2/CAPN2	3
GO:1902652	secondary alcohol metabolic process	3/998	15/16374	0.0592939	0.357766	0.319746	ACADVL/APOE/LMF1	3
GO:2000573	positive regulation of DNA biosynthetic process	3/998	15/16374	0.0592939	0.357766	0.319746	RGCC/PDGFRB/FGF2	3
GO:1905114	cell surface receptor signaling pathway involved in cell-cell signaling	10/998	94/16374	0.0599202	0.357766	0.319746	WWOX/APCDD1/WIF1/KANK1/RNF43/FGFR2/NFATC4/NFATC1/MACF1/WLS	10
GO:1990830	cellular response to leukemia inhibitory factor	10/998	94/16374	0.0599202	0.357766	0.319746	JARID2/PADI2/PFKP/MRAS/RFX2/DTX1/BCAT2/MAT2A/SYNGR1/KDM3A	10
GO:0006839	mitochondrial transport	9/998	82/16374	0.0613553	0.357766	0.319746	MICALL2/BCL2/SREBF1/RHOU/ABLIM3/STARD3/BAG3/BNIP3/BNIP3L	9
GO:0033138	positive regulation of peptidyl-serine phosphorylation	9/998	82/16374	0.0613553	0.357766	0.319746	RAPGEF3/NTRK2/ARRB1/STOX1/BCL2/VEGFA/NTRK3/TERF2IP/AKAP9	9
GO:0021549	cerebellum development	7/998	58/16374	0.0615744	0.357766	0.319746	CNTN1/CKB/MT-CO1/MT-ND4/NCOA1/FAIM2/PPARGC1A	7
GO:0030593	neutrophil chemotaxis	7/998	58/16374	0.0615744	0.357766	0.319746	PDE4D/RIPOR2/CAMK1D/PREX1/VAV3/TGFB2/THBS4	7
GO:0061053	somite development	7/998	58/16374	0.0615744	0.357766	0.319746	PLXNA2/ABI1/CRB2/LFNG/PTCH1/RBBP6/SMAD3	7
GO:0007005	mitochondrion organization	14/998	146/16374	0.061857	0.357766	0.319746	STOX1/MTERF1/SLC25A33/BNIP3/NRF1/EPAS1/BNIP3L/FBXO7/NIPSNAP2/SIRT5/MAN2A1/GDAP1/PPARGC1A/AGTPBP1	14
GO:0048732	gland development	12/998	120/16374	0.0619744	0.357766	0.319746	ERBB4/MT-CO2/BCL2/SOX9/SERPINE2/FGFR2/NCOA1/VEGFA/HIF1A/SLC9A3R1/TGFB2/KALRN	12
GO:0006897	endocytosis	20/998	227/16374	0.0624691	0.357766	0.319746	DNM3/FNBP1/GSN/ITSN1/RIN2/LRP4/ANK2/HIP1R/TF/DPYSL2/MYO6/RIN3/EPS15L1/EEF2K/TNK2/ESYT2/INPPL1/AXL/APOE/NPC1	20
GO:0033028	myeloid cell apoptotic process	4/998	25/16374	0.0624826	0.357766	0.319746	BCL2/MEF2C/ITPKB/THRA	4
GO:0043113	receptor clustering	4/998	25/16374	0.0624826	0.357766	0.319746	GSN/MAGI2/LRP4/CD81	4
GO:0051149	positive regulation of muscle cell differentiation	4/998	25/16374	0.0624826	0.357766	0.319746	CTNNA2/BOC/MEF2C/MAPK11	4
GO:0055117	regulation of cardiac muscle contraction	4/998	25/16374	0.0624826	0.357766	0.319746	ANK2/ADRA1B/CALM1/AKAP9	4
GO:0070328	triglyceride homeostasis	4/998	25/16374	0.0624826	0.357766	0.319746	RORA/SCARB1/MED13/APOE	4
GO:1900740	positive regulation of protein insertion into mitochondrial membrane involved in apoptotic signaling pathway	4/998	25/16374	0.0624826	0.357766	0.319746	BCL2/PPP1R13B/TFDP2/TP53BP2	4
GO:0061024	membrane organization	16/998	173/16374	0.0630819	0.357766	0.319746	FNBP1/ARRB1/KIAA0319/ITSN1/LRP4/ANK2/REPS1/HIP1R/MBP/SYT9/TF/EPS15/DNAJC6/EPS15L1/SYT11/APOE	16
GO:0001568	blood vessel development	10/998	95/16374	0.0634937	0.357766	0.319746	GJA1/TCF7L2/FOXO1/SGCD/PRRX1/VEGFA/NRP1/MEF2C/MAP3K3/APOE	10
GO:0032355	response to estradiol	10/998	95/16374	0.0634937	0.357766	0.319746	GJA1/CST3/TXNIP/CD38/PDGFRB/NCOA1/SLC6A1/AGT/ADCYAP1R1/PTCH1	10
GO:0006012	galactose metabolic process	2/998	7/16374	0.0635078	0.357766	0.319746	CHST1/PPARGC1A	2
GO:0006657	CDP-choline pathway	2/998	7/16374	0.0635078	0.357766	0.319746	CDS1/CHPT1	2
GO:0006701	progesterone biosynthetic process	2/998	7/16374	0.0635078	0.357766	0.319746	STARD3/PPARGC1A	2
GO:0010518	positive regulation of phospholipase activity	2/998	7/16374	0.0635078	0.357766	0.319746	FGFR3/FGFR2	2
GO:0010890	positive regulation of sequestering of triglyceride	2/998	7/16374	0.0635078	0.357766	0.319746	PLIN5/OSBPL11	2
GO:0017014	protein nitrosylation	2/998	7/16374	0.0635078	0.357766	0.319746	SNTA1/OXR1	2
GO:0018198	peptidyl-cysteine modification	2/998	7/16374	0.0635078	0.357766	0.319746	SNTA1/OXR1	2
GO:0021796	cerebral cortex regionalization	2/998	7/16374	0.0635078	0.357766	0.319746	EMX2/ADGRG1	2
GO:0032364	oxygen homeostasis	2/998	7/16374	0.0635078	0.357766	0.319746	HIF1A/EGLN1	2
GO:0032366	intracellular sterol transport	2/998	7/16374	0.0635078	0.357766	0.319746	ABCA2/SCP2	2
GO:0032489	regulation of Cdc42 protein signal transduction	2/998	7/16374	0.0635078	0.357766	0.319746	NRP1/APOE	2
GO:0032717	negative regulation of interleukin-8 production	2/998	7/16374	0.0635078	0.357766	0.319746	ARRB1/OTUD7B	2
GO:0032808	lacrimal gland development	2/998	7/16374	0.0635078	0.357766	0.319746	SOX9/FGFR2	2
GO:0033210	leptin-mediated signaling pathway	2/998	7/16374	0.0635078	0.357766	0.319746	MT3/LEPR	2
GO:0034551	mitochondrial respiratory chain complex III assembly	2/998	7/16374	0.0635078	0.357766	0.319746	SLC25A33/TTC19	2
GO:0036018	cellular response to erythropoietin	2/998	7/16374	0.0635078	0.357766	0.319746	MT1X/MT2A	2
GO:0043654	recognition of apoptotic cell	2/998	7/16374	0.0635078	0.357766	0.319746	MEGF10/SCARB1	2
GO:0044341	sodium-dependent phosphate transport	2/998	7/16374	0.0635078	0.357766	0.319746	SLC17A7/CRY2	2
GO:0044829	positive regulation by host of viral genome replication	2/998	7/16374	0.0635078	0.357766	0.319746	STOM/NUCKS1	2
GO:0045822	negative regulation of heart contraction	2/998	7/16374	0.0635078	0.357766	0.319746	ATP1A2/PDE4D	2
GO:0048672	positive regulation of collateral sprouting	2/998	7/16374	0.0635078	0.357766	0.319746	EFNA5/SEMA4D	2
GO:0048842	positive regulation of axon extension involved in axon guidance	2/998	7/16374	0.0635078	0.357766	0.319746	VEGFA/NRP1	2
GO:0051452	intracellular pH reduction	2/998	7/16374	0.0635078	0.357766	0.319746	BCL2/TTPA	2
GO:0051694	pointed-end actin filament capping	2/998	7/16374	0.0635078	0.357766	0.319746	LMOD1/TMOD2	2
GO:0060179	male mating behavior	2/998	7/16374	0.0635078	0.357766	0.319746	NCOA1/GRIN1	2
GO:0060573	cell fate specification involved in pattern specification	2/998	7/16374	0.0635078	0.357766	0.319746	GLI3/SUFU	2
GO:0060687	regulation of branching involved in prostate gland morphogenesis	2/998	7/16374	0.0635078	0.357766	0.319746	FGFR2/RXRA	2
GO:0061002	negative regulation of dendritic spine morphogenesis	2/998	7/16374	0.0635078	0.357766	0.319746	DNM3/NLGN3	2
GO:0061469	regulation of type B pancreatic cell proliferation	2/998	7/16374	0.0635078	0.357766	0.319746	NR1D1/ERRFI1	2
GO:0071447	cellular response to hydroperoxide	2/998	7/16374	0.0635078	0.357766	0.319746	DAPK1/OXR1	2
GO:0071455	cellular response to hyperoxia	2/998	7/16374	0.0635078	0.357766	0.319746	FOXO1/ATG7	2
GO:0071472	cellular response to salt stress	2/998	7/16374	0.0635078	0.357766	0.319746	AQP1/EFHD1	2
GO:0071838	cell proliferation in bone marrow	2/998	7/16374	0.0635078	0.357766	0.319746	MEF2C/MAP3K3	2
GO:0072197	ureter morphogenesis	2/998	7/16374	0.0635078	0.357766	0.319746	SOX9/EMX2	2
GO:0097065	anterior head development	2/998	7/16374	0.0635078	0.357766	0.319746	SOX9/SSBP3	2
GO:1900744	regulation of p38MAPK cascade	2/998	7/16374	0.0635078	0.357766	0.319746	PER1/PHLPP1	2
GO:1903997	positive regulation of non-membrane spanning protein tyrosine kinase activity	2/998	7/16374	0.0635078	0.357766	0.319746	NTRK2/ADRA1A	2
GO:1990791	dorsal root ganglion development	2/998	7/16374	0.0635078	0.357766	0.319746	UNC5C/NRP1	2
GO:2000987	positive regulation of behavioral fear response	2/998	7/16374	0.0635078	0.357766	0.319746	GJA1/MEF2C	2
GO:0016310	phosphorylation	31/998	382/16374	0.0636141	0.357883	0.31985	ERBB4/EFNA5/CKB/NTRK2/ARRB1/CTDSPL/CCND3/ALK/SIRPA/TNIK/SOX9/FBLN1/MT3/PRNP/VEGFA/NRP1/NTRK3/SEMA4D/PDXK/SLC25A33/EDNRB/CKMT2/ITPKB/CD109/TERF2IP/LIMK2/PGK1/TNK2/KNDC1/DYNLL1/PPARGC1A	31
GO:0008344	adult locomotory behavior	6/998	47/16374	0.0644491	0.361607	0.323179	ATP1A2/PREX2/LGI4/SNCG/KALRN/GRIN1	6
GO:0014909	smooth muscle cell migration	6/998	47/16374	0.0644491	0.361607	0.323179	BCL2/PDGFRB/SORL1/NRP1/NDRG4/PPARGC1A	6
GO:0072001	renal system development	11/998	108/16374	0.064683	0.362433	0.323917	LRP4/WFS1/RIDA/TNS2/AGT/VEGFA/PTCH1/TGFB2/PCSK5/FSTL3/ITGB4	11
GO:0048565	digestive tract development	9/998	83/16374	0.0652816	0.365297	0.326477	LGR4/BCL2/FGFR2/GLI3/COBL/HIF1A/EDNRB/PDGFC/ITGB4	9
GO:0010634	positive regulation of epithelial cell migration	5/998	36/16374	0.0655086	0.365589	0.326737	DOCK5/SOX9/CTSH/HIF1A/TGFB2	5
GO:0099172	presynapse organization	5/998	36/16374	0.0655086	0.365589	0.326737	LRP4/NTRK3/NTNG2/NLGN3/PCDH17	5
GO:0043583	ear development	7/998	59/16374	0.0663674	0.368536	0.329372	STOX1/BCL2/GJB6/PDGFRB/FREM2/TGFB2/BMPER	7
GO:0048469	cell maturation	7/998	59/16374	0.0663674	0.368536	0.329372	BCL2/PTH1R/VEGFA/EDNRB/EPAS1/HES5/AXL	7
GO:0050680	negative regulation of epithelial cell proliferation	7/998	59/16374	0.0663674	0.368536	0.329372	SOX9/FGFR2/TGFBR3/RIDA/PTCH1/TGFB2/PEX2	7
GO:0061418	regulation of transcription from RNA polymerase II promoter in response to hypoxia	8/998	71/16374	0.0663894	0.368536	0.329372	HIF3A/EGLN3/STOX1/PSMA1/VEGFA/HIF1A/EPAS1/EGLN1	8
GO:0042060	wound healing	27/998	328/16374	0.0691841	0.378822	0.338565	MAP3K5/SDC4/GJA1/GSN/MYLK/KANK1/DOCK9/SERPINE2/FGFR2/GLI3/SYTL4/GNAQ/PDGFRB/FGF2/FUT10/MACF1/ENTPD1/HIF1A/TGFB2/CD109/ITPK1/IRF2/PPARA/AKAP1/SCARB1/SYT11/SMAD3	27
GO:0031532	actin cytoskeleton reorganization	9/998	84/16374	0.0693629	0.378822	0.338565	MKLN1/RAPGEF3/MICALL2/GSN/TNIK/BCAS3/MINK1/NRP1/NTRK3	9
GO:0006636	unsaturated fatty acid biosynthetic process	3/998	16/16374	0.069783	0.378822	0.338565	SCD5/ABCD2/FADS2	3
GO:0006833	water transport	3/998	16/16374	0.069783	0.378822	0.338565	SLC14A1/AQP1/AQP4	3
GO:0010644	cell communication by electrical coupling	3/998	16/16374	0.069783	0.378822	0.338565	GJA1/PDE4D/CALM1	3
GO:0015813	L-glutamate transmembrane transport	3/998	16/16374	0.069783	0.378822	0.338565	SLC1A2/SLC1A3/SLC17A7	3
GO:0021700	developmental maturation	3/998	16/16374	0.069783	0.378822	0.338565	CAMK2B/NFATC4/SLC17A7	3
GO:0031643	positive regulation of myelination	3/998	16/16374	0.069783	0.378822	0.338565	PARD3/S100B/WASF3	3
GO:0032012	regulation of ARF protein signal transduction	3/998	16/16374	0.069783	0.378822	0.338565	PSD2/ARFGEF3/IQSEC2	3
GO:0035025	positive regulation of Rho protein signal transduction	3/998	16/16374	0.069783	0.378822	0.338565	ARRB1/PDGFRB/ADGRG1	3
GO:0043586	tongue development	3/998	16/16374	0.069783	0.378822	0.338565	GLI3/PRDM16/BNC2	3
GO:0060008	Sertoli cell differentiation	3/998	16/16374	0.069783	0.378822	0.338565	CST3/SOX9/SAFB2	3
GO:0071732	cellular response to nitric oxide	3/998	16/16374	0.069783	0.378822	0.338565	AQP1/FOXO1/MT3	3
GO:0097091	synaptic vesicle clustering	3/998	16/16374	0.069783	0.378822	0.338565	MAGI2/NLGN3/PCDH17	3
GO:1901379	regulation of potassium ion transmembrane transport	3/998	16/16374	0.069783	0.378822	0.338565	PRNP/KCNIP4/DPP10	3
GO:1904754	positive regulation of vascular associated smooth muscle cell migration	3/998	16/16374	0.069783	0.378822	0.338565	DOCK5/DOCK4/AGT	3
GO:2000251	positive regulation of actin cytoskeleton reorganization	3/998	16/16374	0.069783	0.378822	0.338565	BCAS3/NRP1/NTRK3	3
GO:0007205	protein kinase C-activating G protein-coupled receptor signaling pathway	4/998	26/16374	0.0704307	0.378893	0.338628	DGKG/PARD3/PLPP1/DGKZ	4
GO:0048265	response to pain	4/998	26/16374	0.0704307	0.378893	0.338628	CACNA1B/EDNRB/CAPN2/THBS4	4
GO:0051090	regulation of DNA-binding transcription factor activity	4/998	26/16374	0.0704307	0.378893	0.338628	MAPK10/SGK1/SGK3/MAPK11	4
GO:0055002	striated muscle cell development	4/998	26/16374	0.0704307	0.378893	0.338628	ADRA1A/PDGFRB/PDLIM5/AGT	4
GO:0060037	pharyngeal system development	4/998	26/16374	0.0704307	0.378893	0.338628	EYA1/PLXNA2/PTCH1/TGFB2	4
GO:0071377	cellular response to glucagon stimulus	4/998	26/16374	0.0704307	0.378893	0.338628	ADCY2/ADCY8/ADCY3/ADCY9	4
GO:0099560	synaptic membrane adhesion	4/998	26/16374	0.0704307	0.378893	0.338628	SPARCL1/EFNA5/NTNG2/PCDH17	4
GO:0001890	placenta development	8/998	72/16374	0.0709012	0.380445	0.340015	HTRA1/TTPA/ITGB8/HIF1A/ARID1A/NDP/EPAS1/RXRA	8
GO:0072089	stem cell proliferation	8/998	72/16374	0.0709012	0.380445	0.340015	ZNRF3/RNF43/GLI3/FBLN1/FGF2/VEGFA/HIF1A/FZD3	8
GO:0120162	positive regulation of cold-induced thermogenesis	10/998	97/16374	0.0710446	0.380726	0.340266	GJA1/LPIN1/PRDM16/VEGFA/PDGFC/EPAS1/LEPR/THRA/KDM3A/PPARGC1A	10
GO:1901565	organonitrogen compound catabolic process	11/998	110/16374	0.0718031	0.383545	0.342785	GRIN2C/GJA1/FMN2/SOX9/SERPINE2/FOXO1/RIDA/SORL1/ATG7/SCARB1/SMAD3	11
GO:0001662	behavioral fear response	5/998	37/16374	0.0721211	0.383545	0.342785	BRINP1/GJA1/BCL2/MEF2C/APOE	5
GO:0007162	negative regulation of cell adhesion	5/998	37/16374	0.0721211	0.383545	0.342785	PDE3B/PLXNB1/RIPOR2/FBLN1/SEMA4D	5
GO:0042307	positive regulation of protein import into nucleus	5/998	37/16374	0.0721211	0.383545	0.342785	ZIC1/GLI3/BAG3/PIK3R1/SMAD3	5
GO:0043536	positive regulation of blood vessel endothelial cell migration	5/998	37/16374	0.0721211	0.383545	0.342785	FGF2/PRKCA/AKT3/VEGFA/HIF1A	5
GO:0044409	entry into host	5/998	37/16374	0.0721211	0.383545	0.342785	GSN/HS3ST5/TRIM8/ITGAV/IFITM3	5
GO:0060047	heart contraction	9/998	85/16374	0.0735999	0.390912	0.349369	ATP1A2/PDE4D/FXYD1/THRB/CACNA1B/CYP2J2/S100A1/TGFB2/THRA	9
GO:0006909	phagocytosis	14/998	150/16374	0.0738584	0.391787	0.350151	GSN/MERTK/SIRPA/BCR/CAMK1D/ABR/CD47/MEGF10/ITGAV/RAB11FIP2/LEPR/SCARB1/SYT11/AXL	14
GO:0006941	striated muscle contraction	7/998	61/16374	0.0766091	0.3981	0.355793	ATP1A2/ADRA1A/DTNA/ANK2/SGCD/ADRA1B/CALM1	7
GO:0051965	positive regulation of synapse assembly	7/998	61/16374	0.0766091	0.3981	0.355793	EFNA5/FLRT2/NTRK2/EPHB1/NTRK3/EEF2K/NLGN3	7
GO:0048699	generation of neurons	20/998	233/16374	0.0769839	0.3981	0.355793	NTRK2/GJA1/KIAA0319/GPM6A/DDIT4/SPOCK1/GLI3/EMX2/NRBP2/NRP1/NTRK3/TGFB2/MEF2C/ITM2C/HES5/CDKL5/VXN/AXL/ACAP3/FZD3	20
GO:0043009	chordate embryonic development	14/998	151/16374	0.0770804	0.3981	0.355793	EYA1/PLXNA2/ABI1/CRB2/TTPA/LFNG/PTCH1/HIF1A/PCSK5/CAPN2/EPAS1/HES5/ITPK1/SMAD3	14
GO:0003015	heart process	9/998	86/16374	0.0779932	0.3981	0.355793	ATP1A2/PDE4D/FXYD1/THRB/CACNA1B/CYP2J2/S100A1/TGFB2/THRA	9
GO:0001958	endochondral ossification	4/998	27/16374	0.0788692	0.3981	0.355793	FGFR3/CSGALNACT1/MEF2C/INPPL1	4
GO:0035567	non-canonical Wnt signaling pathway	4/998	27/16374	0.0788692	0.3981	0.355793	ZNRF3/DAAM2/TIAM1/CSNK1E	4
GO:0046530	photoreceptor cell differentiation	4/998	27/16374	0.0788692	0.3981	0.355793	RORB/SOX9/VEGFA/CRB1	4
GO:0048741	skeletal muscle fiber development	4/998	27/16374	0.0788692	0.3981	0.355793	BCL2/RIPOR2/RYR1/MYORG	4
GO:0060441	epithelial tube branching involved in lung morphogenesis	4/998	27/16374	0.0788692	0.3981	0.355793	SOX9/LAMA1/FGFR2/CTSH	4
GO:0061049	cell growth involved in cardiac muscle cell development	4/998	27/16374	0.0788692	0.3981	0.355793	ADRA1A/PDLIM5/AGT/PPARA	4
GO:0008584	male gonad development	12/998	125/16374	0.0790413	0.3981	0.355793	GJA1/BCL2/RHOBTB3/SOX9/PDGFRB/NCOA1/TGFB2/MGST1/FSTL3/SAFB2/ADGRG1/MAMLD1	12
GO:0014706	striated muscle tissue development	12/998	125/16374	0.0790413	0.3981	0.355793	GJA1/EYA1/EYA2/RIPOR2/HLF/MEGF10/MEF2C/ARID1A/RYR1/MYORG/SMAD3/EGLN1	12
GO:0006865	amino acid transport	5/998	38/16374	0.0790845	0.3981	0.355793	SFXN5/SLC1A4/SLC7A2/SLC7A10/SLC25A29	5
GO:0010463	mesenchymal cell proliferation	5/998	38/16374	0.0790845	0.3981	0.355793	SOX9/FGFR2/PRRX1/VEGFA/CTNNBIP1	5
GO:0034654	nucleobase-containing compound biosynthetic process	5/998	38/16374	0.0790845	0.3981	0.355793	GJA1/RGCC/PDGFRB/FGF2/MITF	5
GO:0097178	ruffle assembly	5/998	38/16374	0.0790845	0.3981	0.355793	KANK1/ARHGEF26/MTSS1L/COBL/INPPL1	5
GO:0021543	pallium development	11/998	112/16374	0.0794045	0.3981	0.355793	NTRK2/PLCB1/ALK/BBS2/GLI3/NCOA1/SLC2A1/HIF1A/BNIP3/GRIN1/MCPH1	11
GO:0006123	mitochondrial electron transport, cytochrome c to oxygen	3/998	17/16374	0.0810415	0.3981	0.355793	MT-CO1/MT-CO2/MT-CO3	3
GO:0006165	nucleoside diphosphate phosphorylation	3/998	17/16374	0.0810415	0.3981	0.355793	NME9/AK4/NME3	3
GO:0006730	one-carbon metabolic process	3/998	17/16374	0.0810415	0.3981	0.355793	ALDH1L1/DHFR/MAT2A	3
GO:0007194	negative regulation of adenylate cyclase activity	3/998	17/16374	0.0810415	0.3981	0.355793	GRM3/EDNRB/AKAP9	3
GO:0008347	glial cell migration	3/998	17/16374	0.0810415	0.3981	0.355793	EPHA4/TGFB2/IDH2	3
GO:0010801	negative regulation of peptidyl-threonine phosphorylation	3/998	17/16374	0.0810415	0.3981	0.355793	PARD3/DDIT4/CALM1	3
GO:0032367	intracellular cholesterol transport	3/998	17/16374	0.0810415	0.3981	0.355793	ABCA2/SCP2/NPC1	3
GO:0032793	positive regulation of CREB transcription factor activity	3/998	17/16374	0.0810415	0.3981	0.355793	CAMK1D/ADCY8/VEGFA	3
GO:0036475	neuron death in response to oxidative stress	3/998	17/16374	0.0810415	0.3981	0.355793	ATG7/OXR1/FBXO7	3
GO:0051966	regulation of synaptic transmission, glutamatergic	3/998	17/16374	0.0810415	0.3981	0.355793	ATP1A2/SERPINE2/MEF2C	3
GO:0055001	muscle cell development	3/998	17/16374	0.0810415	0.3981	0.355793	ANK2/NFATC4/MEGF10	3
GO:0060740	prostate gland epithelium morphogenesis	3/998	17/16374	0.0810415	0.3981	0.355793	SOX9/FGFR2/RXRA	3
GO:0086014	atrial cardiac muscle cell action potential	3/998	17/16374	0.0810415	0.3981	0.355793	CACNB2/GJA1/ANK2	3
GO:2000811	negative regulation of anoikis	3/998	17/16374	0.0810415	0.3981	0.355793	NTRK2/BCL2/PDK4	3
GO:0001547	antral ovarian follicle growth	2/998	8/16374	0.0813343	0.3981	0.355793	FOXO3/GAS2	2
GO:0003413	chondrocyte differentiation involved in endochondral bone morphogenesis	2/998	8/16374	0.0813343	0.3981	0.355793	SOX9/TRIP11	2
GO:0006000	fructose metabolic process	2/998	8/16374	0.0813343	0.3981	0.355793	PFKFB3/PFKFB2	2
GO:0006183	GTP biosynthetic process	2/998	8/16374	0.0813343	0.3981	0.355793	NME9/NME3	2
GO:0006228	UTP biosynthetic process	2/998	8/16374	0.0813343	0.3981	0.355793	NME9/NME3	2
GO:0006600	creatine metabolic process	2/998	8/16374	0.0813343	0.3981	0.355793	CKB/CKMT2	2
GO:0007097	nuclear migration	2/998	8/16374	0.0813343	0.3981	0.355793	SUN2/SLC9A3R1	2
GO:0007270	neuron-neuron synaptic transmission	2/998	8/16374	0.0813343	0.3981	0.355793	KIF1B/TMOD2	2
GO:0009268	response to pH	2/998	8/16374	0.0813343	0.3981	0.355793	TTPA/ARSB	2
GO:0010642	negative regulation of platelet-derived growth factor receptor signaling pathway	2/998	8/16374	0.0813343	0.3981	0.355793	SLC9A3R1/NDRG4	2
GO:0010873	positive regulation of cholesterol esterification	2/998	8/16374	0.0813343	0.3981	0.355793	AGT/APOE	2
GO:0021548	pons development	2/998	8/16374	0.0813343	0.3981	0.355793	BCL2/GRIN1	2
GO:0030916	otic vesicle formation	2/998	8/16374	0.0813343	0.3981	0.355793	SOX9/FGFR2	2
GO:0031666	positive regulation of lipopolysaccharide-mediated signaling pathway	2/998	8/16374	0.0813343	0.3981	0.355793	SASH1/PRKCA	2
GO:0032042	mitochondrial DNA metabolic process	2/998	8/16374	0.0813343	0.3981	0.355793	STOX1/PPARGC1A	2
GO:0032825	positive regulation of natural killer cell differentiation	2/998	8/16374	0.0813343	0.3981	0.355793	AXL/ZBTB1	2
GO:0035733	hepatic stellate cell activation	2/998	8/16374	0.0813343	0.3981	0.355793	PDGFRB/GCLC	2
GO:0036363	transforming growth factor beta activation	2/998	8/16374	0.0813343	0.3981	0.355793	ITGB8/ITGAV	2
GO:0045823	positive regulation of heart contraction	2/998	8/16374	0.0813343	0.3981	0.355793	PDE4D/TGFB2	2
GO:0046548	retinal rod cell development	2/998	8/16374	0.0813343	0.3981	0.355793	NTRK2/RORB	2
GO:0046689	response to mercury ion	2/998	8/16374	0.0813343	0.3981	0.355793	MT-CYB/BSG	2
GO:0047497	mitochondrion transport along microtubule	2/998	8/16374	0.0813343	0.3981	0.355793	KIF1B/RHOT1	2
GO:0048096	chromatin-mediated maintenance of transcription	2/998	8/16374	0.0813343	0.3981	0.355793	PADI2/ARID1A	2
GO:0060073	micturition	2/998	8/16374	0.0813343	0.3981	0.355793	ADRA1A/KCNMA1	2
GO:0060075	regulation of resting membrane potential	2/998	8/16374	0.0813343	0.3981	0.355793	NALCN/KCNJ10	2
GO:0060732	positive regulation of inositol phosphate biosynthetic process	2/998	8/16374	0.0813343	0.3981	0.355793	PTH1R/ADCYAP1R1	2
GO:0070863	positive regulation of protein exit from endoplasmic reticulum	2/998	8/16374	0.0813343	0.3981	0.355793	SORL1/CD81	2
GO:0072674	multinuclear osteoclast differentiation	2/998	8/16374	0.0813343	0.3981	0.355793	CD109/CD81	2
GO:0097105	presynaptic membrane assembly	2/998	8/16374	0.0813343	0.3981	0.355793	LRP4/NLGN3	2
GO:0098976	excitatory chemical synaptic transmission	2/998	8/16374	0.0813343	0.3981	0.355793	GRIN2C/GRIN1	2
GO:1901844	regulation of cell communication by electrical coupling involved in cardiac conduction	2/998	8/16374	0.0813343	0.3981	0.355793	PDE4D/CALM1	2
GO:1901985	positive regulation of protein acetylation	2/998	8/16374	0.0813343	0.3981	0.355793	RAPGEF3/TERF2IP	2
GO:1903214	regulation of protein targeting to mitochondrion	2/998	8/16374	0.0813343	0.3981	0.355793	SREBF1/BNIP3L	2
GO:2000177	regulation of neural precursor cell proliferation	2/998	8/16374	0.0813343	0.3981	0.355793	FOXO1/FOXO3	2
GO:0030182	neuron differentiation	23/998	277/16374	0.0818301	0.399301	0.356867	DGKG/NTRK2/GPR37L1/ALK/EYA1/DDIT4/GABRB1/GLI3/GPRC5B/NCOA1/MMD2/EMX2/NRBP2/TIAM1/TGFB2/MEF2C/ITM2C/FOXO3/RARB/DTX1/HES5/VXN/FZD3	23
GO:0035176	social behavior	6/998	50/16374	0.0820399	0.399301	0.356867	BRINP1/GRID1/KALRN/EIF4EBP2/GRIN1/NLGN3	6
GO:0006633	fatty acid biosynthetic process	7/998	62/16374	0.0820574	0.399301	0.356867	ACACB/ACSL3/ABCD2/MGLL/PDK4/FASN/ACADVL	7
GO:0007584	response to nutrient	7/998	62/16374	0.0820574	0.399301	0.356867	ACSL3/TTPA/PKM/ENSA/AGL/GCLC/ARSB	7
GO:0009267	cellular response to starvation	7/998	62/16374	0.0820574	0.399301	0.356867	GLUL/SREBF1/FOXO1/CLEC16A/CADPS2/PDK4/ATG7	7
GO:0030323	respiratory tube development	9/998	87/16374	0.0825429	0.401197	0.358562	SREBF1/SOX9/FGFR2/GLI3/RIDA/VEGFA/PCSK5/EPAS1/FSTL3	9
GO:0048598	embryonic morphogenesis	11/998	113/16374	0.0833868	0.404828	0.361807	EYA1/RIPOR2/SOX9/FGFR2/FGF2/NCOA1/CRB2/SLC9A3R1/ARID1A/PHLDB1/AMOT	11
GO:0043112	receptor metabolic process	8/998	75/16374	0.0855311	0.414757	0.37068	MKLN1/ARRB1/MAGI2/EPS15/VEGFA/NR1D1/HIF1A/PPARA	8
GO:0061098	positive regulation of protein tyrosine kinase activity	5/998	39/16374	0.086394	0.418123	0.373689	EPHA4/ABI1/GPRC5B/AGT/PRNP	5
GO:0030509	BMP signaling pathway	12/998	127/16374	0.0866254	0.418123	0.373689	LRP4/NEO1/HTRA1/TGFBR3/CRB2/NUMA1/CHRDL1/FSTL3/HES5/ZNF423/DDX5/BMPER	12
GO:0031032	actomyosin structure organization	12/998	127/16374	0.0866254	0.418123	0.373689	SDC4/RAPGEF3/DLC1/RGCC/CD47/MYH14/NRP1/PPFIA1/MEF2C/PIK3R1/SORBS3/SMAD3	12
GO:0045766	positive regulation of angiogenesis	12/998	127/16374	0.0866254	0.418123	0.373689	RAPGEF3/AQP1/SASH1/CTSH/FGF2/PRKCA/RHOB/DDAH1/VEGFA/ITGB8/HIF1A/ADAM12	12
GO:0001667	ameboidal-type cell migration	9/998	88/16374	0.0872492	0.420517	0.375828	DOCK5/SDC4/SOX9/CTSH/FGF2/MACF1/HIF1A/TGFB2/ARSB	9
GO:0001523	retinoid metabolic process	7/998	63/16374	0.087723	0.420517	0.375828	SDC4/ALDH1A1/GPC5/CYP4V2/SDC2/GPC1/APOE	7
GO:0042593	glucose homeostasis	10/998	101/16374	0.0877801	0.420517	0.375828	TCF7L2/WFS1/ADCY8/PTCH1/PDK4/HIF1A/KLF7/LEPR/CRY2/STXBP5L	10
GO:0015914	phospholipid transport	4/998	28/16374	0.0877852	0.420517	0.375828	PITPNC1/PCTP/SCARB1/APOE	4
GO:0048662	negative regulation of smooth muscle cell proliferation	4/998	28/16374	0.0877852	0.420517	0.375828	NDRG2/NDRG4/CTNNBIP1/PPARGC1A	4
GO:0051204	protein insertion into mitochondrial membrane	4/998	28/16374	0.0877852	0.420517	0.375828	BCL2/PPP1R13B/TFDP2/TP53BP2	4
GO:0007169	transmembrane receptor protein tyrosine kinase signaling pathway	19/998	223/16374	0.0878257	0.420517	0.375828	ERBB4/EFNA5/CCND3/KANK1/NRG3/ABI1/FGFR2/MT3/AGT/VEGFA/NTRK3/HIF1A/SLC9A3R1/NDRG4/PDGFC/PIK3R1/GPC1/MYORG/NUCKS1	19
GO:0001541	ovarian follicle development	6/998	51/16374	0.0884409	0.421531	0.376735	ARRB1/BCL2/VEGFA/LFNG/FOXO3/GAS2	6
GO:0006635	fatty acid beta-oxidation	6/998	51/16374	0.0884409	0.421531	0.376735	PLIN5/ACACB/ABCD2/PPARA/ACADVL/PEX2	6
GO:0042542	response to hydrogen peroxide	6/998	51/16374	0.0884409	0.421531	0.376735	BCL2/MT-ND5/TXNIP/PDGFRB/CAPN2/PPP2CB	6
GO:0050885	neuromuscular process controlling balance	6/998	51/16374	0.0884409	0.421531	0.376735	GRIN2C/CAMTA1/SLC1A3/CDH23/BCR/ABR	6
GO:0001934	positive regulation of protein phosphorylation	13/998	141/16374	0.0890661	0.424028	0.378966	ERBB4/EFNA5/NTRK2/ARRB1/CCND3/TNIK/SOX9/MT3/VEGFA/NTRK3/SEMA4D/EDNRB/KNDC1	13
GO:0030335	positive regulation of cell migration	17/998	196/16374	0.0903232	0.429524	0.383878	MYLK/FAM107A/VSIR/CTSH/PDGFRB/PRKCA/SUN2/ZNF703/PREX1/TIAM1/VEGFA/NTRK3/SEMA4D/ITGAV/PIK3R1/SMAD3/NUMB	17
GO:0001933	negative regulation of protein phosphorylation	8/998	76/16374	0.0907721	0.430648	0.384883	CTDSPL/SIRPA/FBLN1/PRNP/NTRK3/CD109/TERF2IP/PPARGC1A	8
GO:0030879	mammary gland development	8/998	76/16374	0.0907721	0.430648	0.384883	ERBB4/MT-CO2/SOX9/NCOA1/VEGFA/HIF1A/KALRN/FASN	8
GO:0007160	cell-matrix adhesion	14/998	155/16374	0.0908688	0.430648	0.384883	MKLN1/COL5A3/DLC1/TESK2/BCL2/LYVE1/SNED1/MINK1/TIAM1/PPFIA1/ITGA7/ITGAV/PIK3R1/ITGB4	14
GO:0046649	lymphocyte activation	9/998	89/16374	0.0921117	0.433978	0.387859	MERTK/EPHB1/FGL1/TYRO3/CD47/CD81/NCK2/FBXO7/AXL	9
GO:0006826	iron ion transport	3/998	18/16374	0.093025	0.433978	0.387859	TTYH1/HEPH/TF	3
GO:0009416	response to light stimulus	3/998	18/16374	0.093025	0.433978	0.387859	MAPK10/SLC1A3/CRY2	3
GO:0014911	positive regulation of smooth muscle cell migration	3/998	18/16374	0.093025	0.433978	0.387859	BCL2/PDGFRB/NRP1	3
GO:0021544	subpallium development	3/998	18/16374	0.093025	0.433978	0.387859	BBS2/JAKMIP1/RARB	3
GO:0032011	ARF protein signal transduction	3/998	18/16374	0.093025	0.433978	0.387859	PSD2/ARFGEF3/IQSEC2	3
GO:0033555	multicellular organismal response to stress	3/998	18/16374	0.093025	0.433978	0.387859	ADCYAP1R1/CAPN2/THBS4	3
GO:0035886	vascular smooth muscle cell differentiation	3/998	18/16374	0.093025	0.433978	0.387859	NFATC1/VEGFA/NFATC2	3
GO:0042789	mRNA transcription by RNA polymerase II	3/998	18/16374	0.093025	0.433978	0.387859	SREBF1/HIF1A/ZBTB1	3
GO:0043153	entrainment of circadian clock by photoperiod	3/998	18/16374	0.093025	0.433978	0.387859	BHLHE40/PER1/CRY2	3
GO:0051693	actin filament capping	3/998	18/16374	0.093025	0.433978	0.387859	GSN/SPTBN1/SPTAN1	3
GO:0051895	negative regulation of focal adhesion assembly	3/998	18/16374	0.093025	0.433978	0.387859	DLC1/FAM107A/BCAS3	3
GO:0060749	mammary gland alveolus development	3/998	18/16374	0.093025	0.433978	0.387859	ERBB4/VEGFA/HIF1A	3
GO:2000114	regulation of establishment of cell polarity	3/998	18/16374	0.093025	0.433978	0.387859	KANK1/RIPOR2/BCAS3	3
GO:0007568	aging	17/998	197/16374	0.0935489	0.435709	0.389406	MT-CO1/MT-ATP6/MT-ND4/GSN/ADRA1A/PDE4D/SREBF1/PTH1R/GJB6/PDGFRB/AGT/PRNP/EDNRB/ATG7/FOXO3/GCLC/PPARGC1A	17
GO:0072594	establishment of protein localization to organelle	7/998	64/16374	0.0936045	0.435709	0.389406	ZIC1/GLI3/BAG3/PIK3R1/SMAD3/PKIA/SUFU	7
GO:0043124	negative regulation of I-kappaB kinase/NF-kappaB signaling	5/998	40/16374	0.0940438	0.437267	0.390798	RORA/OTUD7B/NR1D1/PPM1B/PER1	5
GO:0048589	developmental growth	14/998	156/16374	0.0945423	0.439096	0.392434	WWC1/FGFR3/BCL2/PLCB1/BBS2/FGFR2/TGFBR3/GLI3/PTCH1/MTM1/TGFB2/NDRG4/RXRA/SMAD3	14
GO:0070830	bicellular tight junction assembly	6/998	52/16374	0.0951063	0.441128	0.394249	PARD3/MICALL2/GJA1/TJP1/FRMPD2/PATJ	6
GO:0043491	protein kinase B signaling	20/998	240/16374	0.0965789	0.441128	0.394249	ERBB4/STOX1/FGFR3/MERTK/ITSN1/MAGI2/SOX9/TCF7L2/FGFR2/PDGFRB/TYRO3/FGF2/MT3/SLC9A3R1/MTM1/PHLPP1/PIK3R1/NRG2/MYORG/AXL	20
GO:0030168	platelet activation	13/998	143/16374	0.0967887	0.441128	0.394249	DGKG/GNA14/ARRB1/MERTK/CSRP1/GNAQ/ENTPD2/TYRO3/PRKCA/VAV3/PIK3R1/APOE/DGKZ	13
GO:0006811	ion transport	19/998	226/16374	0.0968722	0.441128	0.394249	SLC1A2/CACNA2D3/SLC1A3/TPCN1/KCNQ3/NALCN/CACNA1B/SLC25A18/CLDN10/SLC24A4/SLC15A2/GABRB1/KCNMA1/KCNA2/KCNJ10/SLC22A15/KCND3/SLC9A3R1/SLC17A7	19
GO:0009952	anterior/posterior pattern specification	10/998	103/16374	0.0969684	0.441128	0.394249	GLI3/SSBP3/ZBTB16/COBL/EMX2/LFNG/WLS/PCSK5/TSHZ1/CTNNBIP1	10
GO:0000768	syncytium formation by plasma membrane fusion	4/998	29/16374	0.097164	0.441128	0.394249	RAPGEF3/RIPOR2/NFATC2/CAPN2	4
GO:0001844	protein insertion into mitochondrial membrane involved in apoptotic signaling pathway	4/998	29/16374	0.097164	0.441128	0.394249	BCL2/PPP1R13B/TFDP2/TP53BP2	4
GO:0007389	pattern specification process	4/998	29/16374	0.097164	0.441128	0.394249	ASPH/EYA1/ZIC1/NRG3	4
GO:0014031	mesenchymal cell development	4/998	29/16374	0.097164	0.441128	0.394249	ERBB4/BCL2/HIF1A/EDNRB	4
GO:0034109	homotypic cell-cell adhesion	4/998	29/16374	0.097164	0.441128	0.394249	SERPINE2/PRKCA/ZNF703/MEGF10	4
GO:0046676	negative regulation of insulin secretion	4/998	29/16374	0.097164	0.441128	0.394249	SREBF1/SYTL4/PFKL/STXBP5L	4
GO:0060402	calcium ion transport into cytosol	4/998	29/16374	0.097164	0.441128	0.394249	ADRA1A/BCL2/ADCYAP1R1/GRIN1	4
GO:0070252	actin-mediated cell contraction	4/998	29/16374	0.097164	0.441128	0.394249	ATP1A2/PDE4D/ANK2/PARVA	4
GO:0071549	cellular response to dexamethasone stimulus	4/998	29/16374	0.097164	0.441128	0.394249	AQP1/DDIT4/FOXO1/ERRFI1	4
GO:0086003	cardiac muscle cell contraction	4/998	29/16374	0.097164	0.441128	0.394249	ATP1A2/PDE4D/ANK2/SGCD	4
GO:0009887	animal organ morphogenesis	22/998	269/16374	0.0983856	0.441128	0.394249	FLRT2/ABLIM1/GJA1/FGFR3/EYA1/SOX9/LAMA1/FGFR2/TGFBR3/FGF2/VEGFA/NRP1/LFNG/PTCH1/HIF1A/TGFB2/MEF2C/PDGFC/RYR1/THRA/EGLN1/FZD3	22
GO:0018105	peptidyl-serine phosphorylation	18/998	213/16374	0.100228	0.441128	0.394249	RAPGEF3/NTRK2/ARRB1/STOX1/BCL2/PDE4D/DDIT4/CAMK2A/PRKCA/VEGFA/NTRK3/PRKX/PLCL1/TERF2IP/NCK2/CSNK1E/AKAP9/MKNK1	18
GO:0001710	mesodermal cell fate commitment	2/998	9/16374	0.100467	0.441128	0.394249	EYA1/EYA2	2
GO:0006081	cellular aldehyde metabolic process	2/998	9/16374	0.100467	0.441128	0.394249	ALDH1A1/ALDH7A1	2
GO:0006241	CTP biosynthetic process	2/998	9/16374	0.100467	0.441128	0.394249	NME9/NME3	2
GO:0014816	skeletal muscle satellite cell differentiation	2/998	9/16374	0.100467	0.441128	0.394249	EPHB1/MEGF10	2
GO:0015812	gamma-aminobutyric acid transport	2/998	9/16374	0.100467	0.441128	0.394249	SLC6A1/SLC6A11	2
GO:0019227	neuronal action potential propagation	2/998	9/16374	0.100467	0.441128	0.394249	NTRK2/NTRK3	2
GO:0019852	L-ascorbic acid metabolic process	2/998	9/16374	0.100467	0.441128	0.394249	SLC2A1/GCLC	2
GO:0022407	regulation of cell-cell adhesion	2/998	9/16374	0.100467	0.441128	0.394249	EFNA5/MINK1	2
GO:0032680	regulation of tumor necrosis factor production	2/998	9/16374	0.100467	0.441128	0.394249	SIRPA/CD47	2
GO:0032926	negative regulation of activin receptor signaling pathway	2/998	9/16374	0.100467	0.441128	0.394249	MAGI2/FSTL3	2
GO:0033194	response to hydroperoxide	2/998	9/16374	0.100467	0.441128	0.394249	MT-ND1/CD38	2
GO:0034405	response to fluid shear stress	2/998	9/16374	0.100467	0.441128	0.394249	GJA1/PDGFRB	2
GO:0035739	CD4-positive, alpha-beta T cell proliferation	2/998	9/16374	0.100467	0.441128	0.394249	VSIR/CD81	2
GO:0035973	aggrephagy	2/998	9/16374	0.100467	0.441128	0.394249	HSPB8/BAG3	2
GO:0042355	L-fucose catabolic process	2/998	9/16374	0.100467	0.441128	0.394249	FUT10/FUT9	2
GO:0043413	macromolecule glycosylation	2/998	9/16374	0.100467	0.441128	0.394249	RAMP1/MT3	2
GO:0043501	skeletal muscle adaptation	2/998	9/16374	0.100467	0.441128	0.394249	CAMK2G/CAMK2B	2
GO:0043653	mitochondrial fragmentation involved in apoptotic process	2/998	9/16374	0.100467	0.441128	0.394249	ERBB4/BNIP3	2
GO:0046173	polyol biosynthetic process	2/998	9/16374	0.100467	0.441128	0.394249	PTH1R/ADCYAP1R1	2
GO:0050764	regulation of phagocytosis	2/998	9/16374	0.100467	0.441128	0.394249	ITGAV/SCARB1	2
GO:0050891	multicellular organismal water homeostasis	2/998	9/16374	0.100467	0.441128	0.394249	AQP1/AQP4	2
GO:0051451	myoblast migration	2/998	9/16374	0.100467	0.441128	0.394249	MEGF10/THBS4	2
GO:0051668	localization within membrane	2/998	9/16374	0.100467	0.441128	0.394249	GSN/CD81	2
GO:0051782	negative regulation of cell division	2/998	9/16374	0.100467	0.441128	0.394249	TXNIP/PTCH1	2
GO:0060502	epithelial cell proliferation involved in lung morphogenesis	2/998	9/16374	0.100467	0.441128	0.394249	SOX9/FGFR2	2
GO:0060982	coronary artery morphogenesis	2/998	9/16374	0.100467	0.441128	0.394249	VEGFA/NRP1	2
GO:0061549	sympathetic ganglion development	2/998	9/16374	0.100467	0.441128	0.394249	NRP1/FZD3	2
GO:0071374	cellular response to parathyroid hormone stimulus	2/998	9/16374	0.100467	0.441128	0.394249	GJA1/MEF2C	2
GO:0071670	smooth muscle cell chemotaxis	2/998	9/16374	0.100467	0.441128	0.394249	PDGFRB/PARVA	2
GO:0086026	atrial cardiac muscle cell to AV node cell signaling	2/998	9/16374	0.100467	0.441128	0.394249	GJA1/ANK2	2
GO:0097152	mesenchymal cell apoptotic process	2/998	9/16374	0.100467	0.441128	0.394249	SOX9/HIF1A	2
GO:0098868	bone growth	2/998	9/16374	0.100467	0.441128	0.394249	RARB/LEPR	2
GO:0099010	modification of postsynaptic structure	2/998	9/16374	0.100467	0.441128	0.394249	ITSN1/TIAM1	2
GO:1902946	protein localization to early endosome	2/998	9/16374	0.100467	0.441128	0.394249	SORL1/NRP1	2
GO:1903715	regulation of aerobic respiration	2/998	9/16374	0.100467	0.441128	0.394249	HIF1A/BNIP3	2
GO:0009611	response to wounding	25/998	313/16374	0.101095	0.443419	0.396297	SLC1A2/GRIN2C/GJA1/GSN/LYVE1/SLC1A3/MYLK/KANK1/DOCK9/SERPINE2/SYTL4/GNAQ/DST/FGF2/NRP1/ENTPD1/TGFB2/CD109/ITGB4/ITPK1/IRF2/ABHD2/AKAP1/SYT11/SMAD3	25
GO:0031623	receptor internalization	8/998	78/16374	0.101796	0.445195	0.397883	MKLN1/ARRB1/MAGI2/RAMP1/GRK3/VEGFA/CD81/GRK4	8
GO:0048709	oligodendrocyte differentiation	8/998	78/16374	0.101796	0.445195	0.397883	NTRK2/GSN/GLI3/DAAM2/BNIP3/HES5/WASF3/NLGN3	8
GO:0099054	presynapse assembly	5/998	41/16374	0.102027	0.445195	0.397883	LRP4/NTRK3/NTNG2/NLGN3/PCDH17	5
GO:0007611	learning or memory	6/998	53/16374	0.102033	0.445195	0.397883	S100B/ADCY8/PRNP/MEF2C/TMOD2/THRA	6
GO:0034113	heterotypic cell-cell adhesion	6/998	53/16374	0.102033	0.445195	0.397883	SIRPA/MBP/CD47/ITGA7/ITGAV/PARVA	6
GO:0042981	regulation of apoptotic process	14/998	158/16374	0.102162	0.445293	0.397971	GJA1/ALK/NDRG1/SEPT4/SOX9/DAPK1/SGK1/MITF/PPP1R13B/PHLPP1/TP53BP2/CRADD/BNIP3L/TRAF3	14
GO:0061351	neural precursor cell proliferation	9/998	91/16374	0.102303	0.445445	0.398108	EPHB1/FOXO1/GLI3/VEGFA/HIF1A/FOXO3/NUMB/ADGRG1/FZD3	9
GO:0017015	regulation of transforming growth factor beta receptor signaling pathway	3/998	19/16374	0.105686	0.456372	0.407873	DKK3/ZNF703/SMAD3	3
GO:0031641	regulation of myelination	3/998	19/16374	0.105686	0.456372	0.407873	LGI4/RARB/HES5	3
GO:0035338	long-chain fatty-acyl-CoA biosynthetic process	3/998	19/16374	0.105686	0.456372	0.407873	ACSBG1/ACSL3/TECR	3
GO:0046474	glycerophospholipid biosynthetic process	3/998	19/16374	0.105686	0.456372	0.407873	CPNE6/ACSL3/CAPN2	3
GO:0046597	negative regulation of viral entry into host cell	3/998	19/16374	0.105686	0.456372	0.407873	GSN/TRIM8/IFITM3	3
GO:0050919	negative chemotaxis	3/998	19/16374	0.105686	0.456372	0.407873	EFNA5/FLRT2/ITGAV	3
GO:0101023	vascular endothelial cell proliferation	3/998	19/16374	0.105686	0.456372	0.407873	FGF2/AKT3/MEF2C	3
GO:0140238	presynaptic endocytosis	3/998	19/16374	0.105686	0.456372	0.407873	SLC17A7/DNAJC6/SYT11	3
GO:0006809	nitric oxide biosynthetic process	7/998	66/16374	0.106008	0.457287	0.408691	RORA/SIRPA/SLC7A2/AGT/CD47/DDAH1/SMAD3	7
GO:0030282	bone mineralization	10/998	105/16374	0.106701	0.459805	0.410941	LGR4/GJA1/FGFR3/SOX9/PTH1R/FGFR2/HIF1A/MEF2C/ANKH/SMAD3	10
GO:0043552	positive regulation of phosphatidylinositol 3-kinase activity	4/998	30/16374	0.106989	0.460017	0.411131	FGFR3/PDGFRB/FGF2/VAV3	4
GO:0051480	regulation of cytosolic calcium ion concentration	4/998	30/16374	0.106989	0.460017	0.411131	CDH23/ADCY8/RYR1/TRPC1	4
GO:0030324	lung development	12/998	132/16374	0.107496	0.460017	0.411131	SREBF1/SOX9/FGFR2/GLI3/TNS3/PDGFRB/RIDA/VEGFA/ERRFI1/EPAS1/FSTL3/MAN2A1	12
GO:0007269	neurotransmitter secretion	8/998	79/16374	0.107576	0.460017	0.411131	CACNA1B/CAMK2A/TSPOAP1/SNCG/PPFIA1/MEF2C/RHOT1/SYT11	8
GO:0014020	primary neural tube formation	8/998	79/16374	0.107576	0.460017	0.411131	SDC4/DLC1/COBL/PTCH1/TGFB2/ARID1A/FZD3/SUFU	8
GO:0006096	glycolytic process	9/998	92/16374	0.107631	0.460017	0.411131	DDIT4/PFKL/HIF1A/PFKFB3/PGM1/PGK1/PPARA/PFKFB2/PPARGC1A	9
GO:0033002	muscle cell proliferation	9/998	92/16374	0.107631	0.460017	0.411131	NDRG2/TCF7L2/FGFR2/PDGFRB/MEGF10/NDRG4/HES5/CTNNBIP1/PPARGC1A	9
GO:0046546	development of primary male sexual characteristics	9/998	92/16374	0.107631	0.460017	0.411131	GJA1/BCL2/RHOBTB3/SOX9/PDGFRB/NCOA1/TGFB2/FSTL3/MAMLD1	9
GO:0016049	cell growth	21/998	258/16374	0.108223	0.462075	0.41297	LGI1/GJA1/RERG/BCL2/FAM107A/CD38/NRG3/SERPINE2/SPOCK1/IL17RB/CHPT1/SGK1/ENO1/MT3/AGT/SGK3/SLC25A33/TGFB2/KIAA1109/DNAJB2/SMAD3	21
GO:0006120	mitochondrial electron transport, NADH to ubiquinone	6/998	54/16374	0.109216	0.464416	0.415063	MT-ND1/MT-ND2/MT-ND3/MT-ND4/MT-ND5/MT-ND4L	6
GO:0009725	response to hormone	6/998	54/16374	0.109216	0.464416	0.415063	RERG/ADRA1A/ME1/GCLC/THRA/KDM3A	6
GO:0043087	regulation of GTPase activity	6/998	54/16374	0.109216	0.464416	0.415063	EFNA5/NTRK2/EPHA4/FGD6/FGD4/VAV3	6
GO:0050877	nervous system process	6/998	54/16374	0.109216	0.464416	0.415063	NTRK2/KCNA2/WFS1/AGT/MYH14/NTRK3	6
GO:0001707	mesoderm formation	5/998	42/16374	0.110335	0.466579	0.416996	FGFR2/CRB2/WLS/ITGB4/SMAD3	5
GO:0022612	gland morphogenesis	5/998	42/16374	0.110335	0.466579	0.416996	BCL2/LAMA1/FGFR2/PTCH1/SLC9A3R1	5
GO:0030155	regulation of cell adhesion	5/998	42/16374	0.110335	0.466579	0.416996	GSN/SOX9/LAMA1/PRKX/LAMA4	5
GO:0034332	adherens junction organization	5/998	42/16374	0.110335	0.466579	0.416996	CADM2/CDH10/CADM3/CDH11/NUMB	5
GO:0060412	ventricular septum morphogenesis	5/998	42/16374	0.110335	0.466579	0.416996	FGFR2/TGFBR3/TGFB2/FGFRL1/EGLN1	5
GO:0019538	protein metabolic process	18/998	216/16374	0.110394	0.466579	0.416996	ASPH/GRIN2C/GJA1/CST3/FMN2/SOX9/SERPINE2/FOXO1/WFS1/SORL1/AGT/EDNRB/ATG7/ITGAV/SMAD3/TRAF3/APOE/CAMK2N1	18
GO:0010628	positive regulation of gene expression	27/998	346/16374	0.111979	0.472801	0.422556	CNTN1/NTRK2/GJA1/GSN/STOX1/NWD1/ANK2/RBMS3/VSIR/SOX9/PLP1/RGCC/CTSH/TNRC6B/MT3/VEGFA/NTRK3/ITGB8/HIF1A/MEF2C/KIF1B/MITF/MAPK11/SMAD3/PPARGC1A/JPX/CAMK2N1	27
GO:0001938	positive regulation of endothelial cell proliferation	7/998	67/16374	0.112524	0.474144	0.423756	FGF2/PRKCA/AKT3/VEGFA/NRP1/HIF1A/THBS4	7
GO:0016570	histone modification	7/998	67/16374	0.112524	0.474144	0.423756	ARRB1/JARID2/SREBF1/MT3/CDK9/PPARGC1A/AKAP8L	7
GO:0008625	extrinsic apoptotic signaling pathway via death domain receptors	8/998	80/16374	0.113533	0.475898	0.425324	BCL2/MAL/DAPK1/BAG3/FAIM2/TMBIM1/PIK3R1/CRADD	8
GO:0016525	negative regulation of angiogenesis	8/998	80/16374	0.113533	0.475898	0.425324	PDE3B/RGCC/SEMA4A/AGT/TGFB2/AMOT/PGK1/THBS4	8
GO:0097191	extrinsic apoptotic signaling pathway	15/998	175/16374	0.114662	0.475898	0.425324	WWOX/BCL2/MAL/TCF7L2/AGT/NRP1/SGK3/FAIM2/TGFB2/TMBIM1/ITM2C/NOL3/ITGAV/GCLC/SMAD3	15
GO:0032940	secretion by cell	12/998	134/16374	0.116604	0.475898	0.425324	STXBP5/MERTK/SERPINE2/RGCC/SYTL4/STXBP6/TYRO3/CADPS2/AGT/TGFB2/AXL/APOE	12
GO:0006879	cellular iron ion homeostasis	6/998	55/16374	0.11665	0.475898	0.425324	HEPH/TF/HIF1A/CYBRD1/TTC7A/EGLN1	6
GO:0001655	urogenital system development	4/998	31/16374	0.117241	0.475898	0.425324	SOX9/GLI3/PTCH1/ITGB4	4
GO:0016601	Rac protein signal transduction	4/998	31/16374	0.117241	0.475898	0.425324	RHOU/TIAM1/SSX2IP/HACD3	4
GO:0038128	ERBB2 signaling pathway	4/998	31/16374	0.117241	0.475898	0.425324	ERBB4/PRKCA/PIK3R1/NRG2	4
GO:0055013	cardiac muscle cell development	4/998	31/16374	0.117241	0.475898	0.425324	ADRA1A/PDGFRB/PDLIM5/AGT	4
GO:0097345	mitochondrial outer membrane permeabilization	4/998	31/16374	0.117241	0.475898	0.425324	EYA2/HIP1R/BNIP3/RHOT1	4
GO:0007050	cell cycle arrest	15/998	176/16374	0.118705	0.475898	0.425324	BRINP1/HEPACAM/ZFHX3/TCF7L2/RGCC/BRINP2/FAP/PRNP/CAB39L/SLC25A33/TGFB2/CDK9/CGRRF1/GAS2/SMAD3	15
GO:0048659	smooth muscle cell proliferation	9/998	94/16374	0.118743	0.475898	0.425324	NDRG2/TCF7L2/FGFR2/PDGFRB/AGT/NDRG4/HES5/CTNNBIP1/PPARGC1A	9
GO:0048675	axon extension	9/998	94/16374	0.118743	0.475898	0.425324	MACF1/MT3/VEGFA/NRP1/DPYSL2/NTRK3/CDKL5/NLGN3/APOE	9
GO:0021915	neural tube development	5/998	43/16374	0.11896	0.475898	0.425324	PLXNA2/COBL/PTCH1/HES5/ITPK1	5
GO:0031100	animal organ regeneration	5/998	43/16374	0.11896	0.475898	0.425324	MT-CYB/LPIN1/TGFBR3/PKM/AXL	5
GO:0010039	response to iron ion	3/998	20/16374	0.118976	0.475898	0.425324	BCL2/HIF1A/CYBRD1	3
GO:0010881	regulation of cardiac muscle contraction by regulation of the release of sequestered calcium ion	3/998	20/16374	0.118976	0.475898	0.425324	ATP1A2/ANK2/CALM1	3
GO:0021799	cerebral cortex radially oriented cell migration	3/998	20/16374	0.118976	0.475898	0.425324	GLI3/FUT10/ADGRG1	3
GO:0031498	chromatin disassembly	3/998	20/16374	0.118976	0.475898	0.425324	PADI2/SMARCD2/ARID1A	3
GO:0035357	peroxisome proliferator activated receptor signaling pathway	3/998	20/16374	0.118976	0.475898	0.425324	PLIN5/LMO3/RXRA	3
GO:0036120	cellular response to platelet-derived growth factor stimulus	3/998	20/16374	0.118976	0.475898	0.425324	MTSS1L/PDGFRB/ERRFI1	3
GO:0042474	middle ear morphogenesis	3/998	20/16374	0.118976	0.475898	0.425324	EYA1/PRRX1/TSHZ1	3
GO:0045821	positive regulation of glycolytic process	3/998	20/16374	0.118976	0.475898	0.425324	HIF1A/PFKFB3/PFKFB2	3
GO:0046827	positive regulation of protein export from nucleus	3/998	20/16374	0.118976	0.475898	0.425324	RAPGEF3/TCF7L2/BAG3	3
GO:0060445	branching involved in salivary gland morphogenesis	3/998	20/16374	0.118976	0.475898	0.425324	LAMA1/FGFR2/NRP1	3
GO:0007204	positive regulation of cytosolic calcium ion concentration	11/998	121/16374	0.119607	0.475898	0.425324	GJA1/ADRA1A/BCL2/CD38/PTH1R/ADCY8/AGT/ADCYAP1R1/EDNRB/ITGAV/GRIN1	11
GO:0009636	response to toxic substance	8/998	81/16374	0.119665	0.475898	0.425324	BCL2/UNC79/GABRB1/MBP/EPHX1/SLC6A1/TTPA/PPARA	8
GO:0001768	establishment of T cell polarity	2/998	10/16374	0.120682	0.475898	0.425324	GSN/RIPOR2	2
GO:0001776	leukocyte homeostasis	2/998	10/16374	0.120682	0.475898	0.425324	MERTK/AXL	2
GO:0001778	plasma membrane repair	2/998	10/16374	0.120682	0.475898	0.425324	SYTL4/SYT11	2
GO:0001952	regulation of cell-matrix adhesion	2/998	10/16374	0.120682	0.475898	0.425324	BCL2/MINK1	2
GO:0003149	membranous septum morphogenesis	2/998	10/16374	0.120682	0.475898	0.425324	FGFR2/TGFB2	2
GO:0006198	cAMP catabolic process	2/998	10/16374	0.120682	0.475898	0.425324	PDE7B/PDE4D	2
GO:0006639	acylglycerol metabolic process	2/998	10/16374	0.120682	0.475898	0.425324	APOE/LMF1	2
GO:0006878	cellular copper ion homeostasis	2/998	10/16374	0.120682	0.475898	0.425324	MT2A/PRNP	2
GO:0010470	regulation of gastrulation	2/998	10/16374	0.120682	0.475898	0.425324	CRB2/PHLDB1	2
GO:0021930	cerebellar granule cell precursor proliferation	2/998	10/16374	0.120682	0.475898	0.425324	RORA/GPR37L1	2
GO:0032488	Cdc42 protein signal transduction	2/998	10/16374	0.120682	0.475898	0.425324	NRP1/APOE	2
GO:0032957	inositol trisphosphate metabolic process	2/998	10/16374	0.120682	0.475898	0.425324	ITPKB/ITPK1	2
GO:0033762	response to glucagon	2/998	10/16374	0.120682	0.475898	0.425324	MT-CYB/SREBF1	2
GO:0034382	chylomicron remnant clearance	2/998	10/16374	0.120682	0.475898	0.425324	APOE/LMF1	2
GO:0034434	sterol esterification	2/998	10/16374	0.120682	0.475898	0.425324	AGT/APOE	2
GO:0034755	iron ion transmembrane transport	2/998	10/16374	0.120682	0.475898	0.425324	TTYH1/TF	2
GO:0035148	tube formation	2/998	10/16374	0.120682	0.475898	0.425324	BCAS3/VEGFA	2
GO:0035456	response to interferon-beta	2/998	10/16374	0.120682	0.475898	0.425324	XAF1/IFITM3	2
GO:0035871	protein K11-linked deubiquitination	2/998	10/16374	0.120682	0.475898	0.425324	OTUD7A/OTUD7B	2
GO:0040019	positive regulation of embryonic development	2/998	10/16374	0.120682	0.475898	0.425324	PLCB1/AMOT	2
GO:0042538	hyperosmotic salinity response	2/998	10/16374	0.120682	0.475898	0.425324	MT-CYB/EFHD1	2
GO:0042670	retinal cone cell differentiation	2/998	10/16374	0.120682	0.475898	0.425324	RORB/THRB	2
GO:0042761	very long-chain fatty acid biosynthetic process	2/998	10/16374	0.120682	0.475898	0.425324	TECR/HACD3	2
GO:0043030	regulation of macrophage activation	2/998	10/16374	0.120682	0.475898	0.425324	RORA/SLC7A2	2
GO:0043114	regulation of vascular permeability	2/998	10/16374	0.120682	0.475898	0.425324	BCR/ABR	2
GO:0044539	long-chain fatty acid import into cell	2/998	10/16374	0.120682	0.475898	0.425324	ACSL3/SLC27A1	2
GO:0046549	retinal cone cell development	2/998	10/16374	0.120682	0.475898	0.425324	RORB/THRB	2
GO:0046638	positive regulation of alpha-beta T cell differentiation	2/998	10/16374	0.120682	0.475898	0.425324	GLI3/ITPKB	2
GO:0048739	cardiac muscle fiber development	2/998	10/16374	0.120682	0.475898	0.425324	SGCD/VEGFA	2
GO:0051004	regulation of lipoprotein lipase activity	2/998	10/16374	0.120682	0.475898	0.425324	PCSK5/LMF1	2
GO:0060009	Sertoli cell development	2/998	10/16374	0.120682	0.475898	0.425324	CST3/SOX9	2
GO:0060088	auditory receptor cell stereocilium organization	2/998	10/16374	0.120682	0.475898	0.425324	RIPOR2/SLC9A3R1	2
GO:0060213	positive regulation of nuclear-transcribed mRNA poly(A) tail shortening	2/998	10/16374	0.120682	0.475898	0.425324	CPEB3/TNRC6B	2
GO:0060442	branching involved in prostate gland morphogenesis	2/998	10/16374	0.120682	0.475898	0.425324	FGFR2/RXRA	2
GO:0071243	cellular response to arsenic-containing substance	2/998	10/16374	0.120682	0.475898	0.425324	CPEB2/MKNK2	2
GO:0071331	cellular response to hexose stimulus	2/998	10/16374	0.120682	0.475898	0.425324	ADCY8/RAB11FIP2	2
GO:0090037	positive regulation of protein kinase C signaling	2/998	10/16374	0.120682	0.475898	0.425324	ADRA1A/VEGFA	2
GO:0090557	establishment of endothelial intestinal barrier	2/998	10/16374	0.120682	0.475898	0.425324	TJP1/FASN	2
GO:0097050	type B pancreatic cell apoptotic process	2/998	10/16374	0.120682	0.475898	0.425324	TCF7L2/WFS1	2
GO:1900271	regulation of long-term synaptic potentiation	2/998	10/16374	0.120682	0.475898	0.425324	CYP46A1/NLGN3	2
GO:1990535	neuron projection maintenance	2/998	10/16374	0.120682	0.475898	0.425324	ABCD2/PRNP	2
GO:0006836	neurotransmitter transport	6/998	56/16374	0.124331	0.489365	0.43736	GABRA2/CAMK2A/SNCG/MEF2C/RHOT1/SYT11	6
GO:0030010	establishment of cell polarity	6/998	56/16374	0.124331	0.489365	0.43736	WWC1/EPHB1/KANK1/RIPOR2/BCAS3/RAB11FIP2	6
GO:0007173	epidermal growth factor receptor signaling pathway	9/998	95/16374	0.124525	0.489666	0.437629	GAREM1/SOX9/HIP1R/AGT/EPS15/ZFYVE28/PIK3R1/NCK2/EPS15L1	9
GO:0070588	calcium ion transmembrane transport	11/998	122/16374	0.124674	0.48979	0.43774	ATP1A2/TRPM3/CACNB2/RYR3/CACNA2D3/CACHD1/NALCN/GPM6A/CACNA1B/ITGAV/TRPC1	11
GO:0044706	multi-multicellular organism process	8/998	82/16374	0.125968	0.494411	0.44187	CST3/BSG/SERPINE2/FBLN1/PCSK5/KALRN/ARID1A/RXRA	8
GO:1902476	chloride transmembrane transport	7/998	69/16374	0.126172	0.494744	0.442168	TTYH1/FXYD1/GABRA2/SLC1A3/SLC1A4/GABRB1/SLC17A7	7
GO:0050905	neuromuscular process	5/998	44/16374	0.12789	0.499653	0.446555	CTNNA2/CDH23/GRIN1/TMEM150C/AGTPBP1	5
GO:0006473	protein acetylation	4/998	32/16374	0.127902	0.499653	0.446555	RAPGEF3/FOXO1/TERF2IP/KLF15	4
GO:0070207	protein homotrimerization	4/998	32/16374	0.127902	0.499653	0.446555	SLC1A2/HSF4/CLYBL/MGST1	4
GO:0086005	ventricular cardiac muscle cell action potential	4/998	32/16374	0.127902	0.499653	0.446555	ANK2/SNTA1/KCND3/KCNE4	4
GO:0006606	protein import into nucleus	9/998	96/16374	0.130455	0.505073	0.451399	ZIC1/TXNIP/GLI3/AGT/BAG3/PIK3R1/SMAD3/PKIA/SUFU	9
GO:0009059	macromolecule biosynthetic process	6/998	57/16374	0.132253	0.505073	0.451399	NR1D1/HIF1A/TGFB2/MITF/PPARA/ITM2B	6
GO:0048593	camera-type eye morphogenesis	6/998	57/16374	0.132253	0.505073	0.451399	BCAR3/EPHB1/GLI3/VEGFA/HIF1A/MAN2A1	6
GO:0051592	response to calcium ion	6/998	57/16374	0.132253	0.505073	0.451399	MT-CYB/TXNIP/KCNMA1/SLC6A1/TRPC1/CALM1	6
GO:0006626	protein targeting to mitochondrion	8/998	83/16374	0.132442	0.505073	0.451399	MICALL2/SREBF1/RHOU/ABLIM3/BAG3/BNIP3L/FBXO7/GDAP1	8
GO:0001659	temperature homeostasis	3/998	21/16374	0.132844	0.505073	0.451399	FOXO1/ACADVL/PPARGC1A	3
GO:0008361	regulation of cell size	3/998	21/16374	0.132844	0.505073	0.451399	RAP1GAP2/VAV3/SLC9A3R1	3
GO:0014850	response to muscle activity	3/998	21/16374	0.132844	0.505073	0.451399	TNS2/HIF1A/PPARGC1A	3
GO:0019725	cellular homeostasis	3/998	21/16374	0.132844	0.505073	0.451399	AQP1/TNS2/RHOT1	3
GO:0046488	phosphatidylinositol metabolic process	3/998	21/16374	0.132844	0.505073	0.451399	PLCB1/PDGFRB/MTMR1	3
GO:0071887	leukocyte apoptotic process	3/998	21/16374	0.132844	0.505073	0.451399	MERTK/MEF2C/ITPKB	3
GO:2001235	positive regulation of apoptotic signaling pathway	3/998	21/16374	0.132844	0.505073	0.451399	TPD52L1/CTSH/NFATC4	3
GO:0001570	vasculogenesis	7/998	70/16374	0.133295	0.505073	0.451399	NTRK2/PDGFRB/VEGFA/ITGB8/AMOT/ITGAV/HDAC7	7
GO:0030029	actin filament-based process	10/998	110/16374	0.133373	0.505073	0.451399	EFNA5/DLC1/BCL2/FAM107A/HIP1R/PDGFRB/CGNL1/NCK2/SORBS3/INPPL1	10
GO:0033554	cellular response to stress	19/998	237/16374	0.134939	0.505073	0.451399	HIF3A/EGLN3/STOX1/CAMK2G/CAMK2B/CAMK2A/PRRX1/AKT3/ADCY8/HSPB8/PSMA1/DDAH1/BAG3/VEGFA/HIF1A/BNIP3/EPAS1/MAP3K3/EGLN1	19
GO:0001657	ureteric bud development	5/998	45/16374	0.137117	0.505073	0.451399	SDC4/FGFR2/RARB/BMPER/SMAD3	5
GO:0001704	formation of primary germ layer	5/998	45/16374	0.137117	0.505073	0.451399	FGFR2/ARID1A/ITGA7/ITGAV/ITGB4	5
GO:0003208	cardiac ventricle morphogenesis	5/998	45/16374	0.137117	0.505073	0.451399	FGFR2/TGFBR3/HIF1A/MEF2C/RXRA	5
GO:0005978	glycogen biosynthetic process	5/998	45/16374	0.137117	0.505073	0.451399	NR1D1/AGL/PGM1/GYS1/PPP1R3C	5
GO:0007602	phototransduction	5/998	45/16374	0.137117	0.505073	0.451399	ARRB1/CDS1/PLEKHB1/GRK4/CALM1	5
GO:0050890	cognition	5/998	45/16374	0.137117	0.505073	0.451399	SLC1A4/FAM107A/JAKMIP1/SOBP/GPR155	5
GO:0001503	ossification	19/998	238/16374	0.138779	0.505073	0.451399	WWOX/LGR4/GJA1/FGFR3/BCL2/LRP4/SOX9/PTH1R/FGFR2/ZBTB16/KREMEN1/TGFB2/MEF2C/CHRDL1/FSTL3/FASN/CDH11/TOB2/THRA	19
GO:0007190	activation of adenylate cyclase activity	4/998	33/16374	0.13895	0.505073	0.451399	ADCY2/ADCY8/ADCY3/ADCY9	4
GO:0014003	oligodendrocyte development	4/998	33/16374	0.13895	0.505073	0.451399	GSN/KCNJ10/HES5/WASF3	4
GO:0031103	axon regeneration	4/998	33/16374	0.13895	0.505073	0.451399	BCL2/EPHA4/DHFR/KREMEN1	4
GO:0048009	insulin-like growth factor receptor signaling pathway	4/998	33/16374	0.13895	0.505073	0.451399	PLCB1/PIK3R1/CRIM1/MYORG	4
GO:0048011	neurotrophin TRK receptor signaling pathway	4/998	33/16374	0.13895	0.505073	0.451399	NTRK2/DDIT4/AGT/NTRK3	4
GO:0060350	endochondral bone morphogenesis	4/998	33/16374	0.13895	0.505073	0.451399	FGFR3/CSGALNACT1/MEF2C/INPPL1	4
GO:0086001	cardiac muscle cell action potential	4/998	33/16374	0.13895	0.505073	0.451399	ATP1A2/CACNB2/ANK2/KCND3	4
GO:0006641	triglyceride metabolic process	6/998	58/16374	0.140408	0.505073	0.451399	SREBF1/PLIN5/SLC27A1/SCARB1/APOE/LMF1	6
GO:0060021	roof of mouth development	7/998	71/16374	0.140613	0.505073	0.451399	ASPH/GLI3/PRRX1/PRDM16/MEF2C/TSHZ1/BNC2	7
GO:0001780	neutrophil homeostasis	2/998	11/16374	0.141776	0.505073	0.451399	MERTK/AXL	2
GO:0002283	neutrophil activation involved in immune response	2/998	11/16374	0.141776	0.505073	0.451399	BCR/ABR	2
GO:0007501	mesodermal cell fate specification	2/998	11/16374	0.141776	0.505073	0.451399	EYA1/EYA2	2
GO:0008037	cell recognition	2/998	11/16374	0.141776	0.505073	0.451399	CSGALNACT1/CNTNAP3	2
GO:0014841	skeletal muscle satellite cell proliferation	2/998	11/16374	0.141776	0.505073	0.451399	EPHB1/MEGF10	2
GO:0016264	gap junction assembly	2/998	11/16374	0.141776	0.505073	0.451399	GJA1/AGT	2
GO:0018119	peptidyl-cysteine S-nitrosylation	2/998	11/16374	0.141776	0.505073	0.451399	SNTA1/OXR1	2
GO:0021521	ventral spinal cord interneuron specification	2/998	11/16374	0.141776	0.505073	0.451399	GLI3/SUFU	2
GO:0021602	cranial nerve morphogenesis	2/998	11/16374	0.141776	0.505073	0.451399	KCNA2/NRP1	2
GO:0021670	lateral ventricle development	2/998	11/16374	0.141776	0.505073	0.451399	AQP1/NUMB	2
GO:0022401	negative adaptation of signaling pathway	2/998	11/16374	0.141776	0.505073	0.451399	ARRB1/GRK4	2
GO:0031581	hemidesmosome assembly	2/998	11/16374	0.141776	0.505073	0.451399	PLEC/ITGB4	2
GO:0033169	histone H3-K9 demethylation	2/998	11/16374	0.141776	0.505073	0.451399	HSF4/KDM3A	2
GO:0034629	cellular protein-containing complex localization	2/998	11/16374	0.141776	0.505073	0.451399	SGCD/NACC2	2
GO:0040015	negative regulation of multicellular organism growth	2/998	11/16374	0.141776	0.505073	0.451399	BBS2/PTCH1	2
GO:0042711	maternal behavior	2/998	11/16374	0.141776	0.505073	0.451399	BRINP1/KALRN	2
GO:0045667	regulation of osteoblast differentiation	2/998	11/16374	0.141776	0.505073	0.451399	FGFR2/DDX5	2
GO:0046135	pyrimidine nucleoside catabolic process	2/998	11/16374	0.141776	0.505073	0.451399	UPP2/NT5E	2
GO:0046902	regulation of mitochondrial membrane permeability	2/998	11/16374	0.141776	0.505073	0.451399	BCL2/BNIP3	2
GO:0048266	behavioral response to pain	2/998	11/16374	0.141776	0.505073	0.451399	CAPN2/THBS4	2
GO:0048681	negative regulation of axon regeneration	2/998	11/16374	0.141776	0.505073	0.451399	EPHA4/KREMEN1	2
GO:0048711	positive regulation of astrocyte differentiation	2/998	11/16374	0.141776	0.505073	0.451399	SERPINE2/IL6ST	2
GO:0050687	negative regulation of defense response to virus	2/998	11/16374	0.141776	0.505073	0.451399	HTRA1/PPM1B	2
GO:0060351	cartilage development involved in endochondral bone morphogenesis	2/998	11/16374	0.141776	0.505073	0.451399	SOX9/TRIP11	2
GO:0060674	placenta blood vessel development	2/998	11/16374	0.141776	0.505073	0.451399	ITGB8/ARID1A	2
GO:0061430	bone trabecula morphogenesis	2/998	11/16374	0.141776	0.505073	0.451399	PLXNB1/SEMA4D	2
GO:0070106	interleukin-27-mediated signaling pathway	2/998	11/16374	0.141776	0.505073	0.451399	IL6ST/JAK1	2
GO:0070278	extracellular matrix constituent secretion	2/998	11/16374	0.141776	0.505073	0.451399	RGCC/AGT	2
GO:0070757	interleukin-35-mediated signaling pathway	2/998	11/16374	0.141776	0.505073	0.451399	IL6ST/JAK1	2
GO:0071711	basement membrane organization	2/998	11/16374	0.141776	0.505073	0.451399	FLRT2/GAS2	2
GO:0098659	inorganic cation import across plasma membrane	2/998	11/16374	0.141776	0.505073	0.451399	ATP1B2/PRNP	2
GO:1901222	regulation of NIK/NF-kappaB signaling	2/998	11/16374	0.141776	0.505073	0.451399	NOL3/UACA	2
GO:1903358	regulation of Golgi organization	2/998	11/16374	0.141776	0.505073	0.451399	PDE4DIP/AKAP9	2
GO:1903428	positive regulation of reactive oxygen species biosynthetic process	2/998	11/16374	0.141776	0.505073	0.451399	FOXO3/GRIN1	2
GO:0035335	peptidyl-tyrosine dephosphorylation	9/998	98/16374	0.142751	0.505073	0.451399	EYA1/EYA2/CDC14A/MTM1/PTPN20/PTPN9/DNAJC6/MTMR1/PTPN4	9
GO:0006898	receptor-mediated endocytosis	14/998	168/16374	0.145651	0.505073	0.451399	MKLN1/ARRB1/MAGI2/REPS1/HIP1R/SORL1/TF/VEGFA/DNAJC6/TNK2/NLGN3/SCARB1/SYT11/APOE	14
GO:0001843	neural tube closure	8/998	85/16374	0.145885	0.505073	0.451399	SDC4/DLC1/COBL/PTCH1/TGFB2/ARID1A/FZD3/SUFU	8
GO:0031648	protein destabilization	5/998	46/16374	0.146628	0.505073	0.451399	GSN/CTSH/PRNP/NR1D1/PEX2	5
GO:0090630	activation of GTPase activity	5/998	46/16374	0.146628	0.505073	0.451399	APC2/MTSS1L/BCAS3/TIAM1/NTRK3	5
GO:0002092	positive regulation of receptor internalization	3/998	22/16374	0.14724	0.505073	0.451399	ARRB1/MAGI2/VEGFA	3
GO:0007215	glutamate receptor signaling pathway	3/998	22/16374	0.14724	0.505073	0.451399	GRIN2C/PLCB1/PRNP	3
GO:0045861	negative regulation of proteolysis	3/998	22/16374	0.14724	0.505073	0.451399	CST3/SERPINE2/CAMK2N1	3
GO:0045921	positive regulation of exocytosis	3/998	22/16374	0.14724	0.505073	0.451399	STXBP5/SYTL4/CADPS2	3
GO:0046716	muscle cell cellular homeostasis	3/998	22/16374	0.14724	0.505073	0.451399	BAG3/HIF1A/MTM1	3
GO:0046856	phosphatidylinositol dephosphorylation	3/998	22/16374	0.14724	0.505073	0.451399	MTM1/MTMR1/INPPL1	3
GO:0048668	collateral sprouting	3/998	22/16374	0.14724	0.505073	0.451399	EFNA5/NIN/SEMA4D	3
GO:0060401	cytosolic calcium ion transport	3/998	22/16374	0.14724	0.505073	0.451399	BCL2/ADCYAP1R1/GRIN1	3
GO:0061912	selective autophagy	3/998	22/16374	0.14724	0.505073	0.451399	CLEC16A/HSPB8/BAG3	3
GO:0030032	lamellipodium assembly	6/998	59/16374	0.14879	0.505073	0.451399	ARHGEF4/ABLIM1/ABLIM3/VAV3/NCK2/WASF3	6
GO:0043507	positive regulation of JUN kinase activity	4/998	34/16374	0.150363	0.505073	0.451399	MAP3K5/SASH1/EPHA4/TIAM1	4
GO:0046632	alpha-beta T cell differentiation	4/998	34/16374	0.150363	0.505073	0.451399	BCL2/GLI3/ZBTB16/ITPKB	4
GO:0001889	liver development	8/998	86/16374	0.152848	0.505073	0.451399	JARID2/SOX9/TGFBR3/COBL/PKM/AK4/SMAD3/MAN2A1	8
GO:0006928	movement of cell or subcellular component	8/998	86/16374	0.152848	0.505073	0.451399	ERBB4/FRMD5/TGFBR3/FBLN1/VEGFA/NRP1/NRG2/SSX2IP	8
GO:0009410	response to xenobiotic stimulus	9/998	100/16374	0.155612	0.505073	0.451399	RORA/PPP1R1B/CYP2J2/CYB5B/EPHX1/CYP46A1/MGST1/SULT1A1/GCLC	9
GO:0042632	cholesterol homeostasis	7/998	73/16374	0.155813	0.505073	0.451399	RORA/NR1D1/ABCA2/SCARB1/MED13/APOE/NPC1	7
GO:0061008	hepaticobiliary system development	7/998	73/16374	0.155813	0.505073	0.451399	JARID2/TGFBR3/COBL/PKM/AK4/SMAD3/MAN2A1	7
GO:0021953	central nervous system neuron differentiation	5/998	47/16374	0.156411	0.505073	0.451399	NTRK2/FGFR2/GABRB1/SPOCK1/HES5	5
GO:0030166	proteoglycan biosynthetic process	5/998	47/16374	0.156411	0.505073	0.451399	CSGALNACT1/NCAN/HS3ST5/TCF7L2/DSE	5
GO:0032515	negative regulation of phosphoprotein phosphatase activity	5/998	47/16374	0.156411	0.505073	0.451399	PHACTR3/PPP4R4/PPP1R1B/ENSA/CRY2	5
GO:0060389	pathway-restricted SMAD protein phosphorylation	5/998	47/16374	0.156411	0.505073	0.451399	LDLRAD4/TGFBR3/RBPMS/TGFB2/BMPER	5
GO:0001944	vasculature development	6/998	60/16374	0.157391	0.505073	0.451399	TCF7L2/FOXO1/NRP1/MEF2C/NDP/MAP3K3	6
GO:0001947	heart looping	6/998	60/16374	0.157391	0.505073	0.451399	GJA1/HIF1A/MEF2C/NDRG4/SMAD3/SUFU	6
GO:0014070	response to organic cyclic compound	6/998	60/16374	0.157391	0.505073	0.451399	MT-ND1/PPP1R1B/ACACB/ACSL3/EPHX1/EDNRB	6
GO:0017148	negative regulation of translation	6/998	60/16374	0.157391	0.505073	0.451399	CPEB3/DHFR/RIDA/DAPK1/GAPDH/PURA	6
GO:0001676	long-chain fatty acid metabolic process	3/998	23/16374	0.162111	0.505073	0.451399	ACSBG1/ACSL3/SLC27A1	3
GO:0030325	adrenal gland development	3/998	23/16374	0.162111	0.505073	0.451399	DKK3/FSTL3/SMAD3	3
GO:0030866	cortical actin cytoskeleton organization	3/998	23/16374	0.162111	0.505073	0.451399	FMNL2/EPB41L1/EPB41L2	3
GO:0032689	negative regulation of interferon-gamma production	3/998	23/16374	0.162111	0.505073	0.451399	VSIR/PRNP/AXL	3
GO:0033137	negative regulation of peptidyl-serine phosphorylation	3/998	23/16374	0.162111	0.505073	0.451399	PDE4D/DDIT4/NCK2	3
GO:0045671	negative regulation of osteoclast differentiation	3/998	23/16374	0.162111	0.505073	0.451399	PIK3R1/FSTL3/TOB2	3
GO:0007520	myoblast fusion	4/998	35/16374	0.162119	0.505073	0.451399	RIPOR2/NFATC2/CAPN2/ADAM12	4
GO:0030177	positive regulation of Wnt signaling pathway	4/998	35/16374	0.162119	0.505073	0.451399	KANK1/FGFR2/MACF1/WLS	4
GO:0042177	negative regulation of protein catabolic process	4/998	35/16374	0.162119	0.505073	0.451399	GRIN2C/FMN2/SERPINE2/SMAD3	4
GO:0048488	synaptic vesicle endocytosis	4/998	35/16374	0.162119	0.505073	0.451399	ITSN1/SLC17A7/DNAJC6/SYT11	4
GO:0048546	digestive tract morphogenesis	4/998	35/16374	0.162119	0.505073	0.451399	BCL2/FGFR2/GLI3/HIF1A	4
GO:0002093	auditory receptor cell morphogenesis	2/998	12/16374	0.163567	0.505073	0.451399	RIPOR2/SLC9A3R1	2
GO:0006068	ethanol catabolic process	2/998	12/16374	0.163567	0.505073	0.451399	ALDH2/SULT1A1	2
GO:0006085	acetyl-CoA biosynthetic process	2/998	12/16374	0.163567	0.505073	0.451399	ACSS1/PDK4	2
GO:0006195	purine nucleotide catabolic process	2/998	12/16374	0.163567	0.505073	0.451399	NT5E/NT5C2	2
GO:0006885	regulation of pH	2/998	12/16374	0.163567	0.505073	0.451399	PDK4/EDNRB	2
GO:0007077	mitotic nuclear envelope disassembly	2/998	12/16374	0.163567	0.505073	0.451399	LPIN1/PRKCA	2
GO:0007175	negative regulation of epidermal growth factor-activated receptor activity	2/998	12/16374	0.163567	0.505073	0.451399	ZFYVE28/ERRFI1	2
GO:0010524	positive regulation of calcium ion transport into cytosol	2/998	12/16374	0.163567	0.505073	0.451399	ADCYAP1R1/GRIN1	2
GO:0010917	negative regulation of mitochondrial membrane potential	2/998	12/16374	0.163567	0.505073	0.451399	BNIP3/BNIP3L	2
GO:0014059	regulation of dopamine secretion	2/998	12/16374	0.163567	0.505073	0.451399	KCNA2/SNCG	2
GO:0014904	myotube cell development	2/998	12/16374	0.163567	0.505073	0.451399	BCL2/NFATC2	2
GO:0016082	synaptic vesicle priming	2/998	12/16374	0.163567	0.505073	0.451399	CADPS2/ERC2	2
GO:0021520	spinal cord motor neuron cell fate specification	2/998	12/16374	0.163567	0.505073	0.451399	GLI3/SUFU	2
GO:0021554	optic nerve development	2/998	12/16374	0.163567	0.505073	0.451399	EPHB1/GLI3	2
GO:0021872	forebrain generation of neurons	2/998	12/16374	0.163567	0.505073	0.451399	GLI3/HES5	2
GO:0030208	dermatan sulfate biosynthetic process	2/998	12/16374	0.163567	0.505073	0.451399	NCAN/DSE	2
GO:0030903	notochord development	2/998	12/16374	0.163567	0.505073	0.451399	SOX9/COBL	2
GO:0031065	positive regulation of histone deacetylation	2/998	12/16374	0.163567	0.505073	0.451399	SREBF1/AKAP8L	2
GO:0032688	negative regulation of interferon-beta production	2/998	12/16374	0.163567	0.505073	0.451399	SIRPA/PPM1B	2
GO:0032700	negative regulation of interleukin-17 production	2/998	12/16374	0.163567	0.505073	0.451399	VSIR/PRNP	2
GO:0032897	negative regulation of viral transcription	2/998	12/16374	0.163567	0.505073	0.451399	TRIM8/IFITM3	2
GO:0035791	platelet-derived growth factor receptor-beta signaling pathway	2/998	12/16374	0.163567	0.505073	0.451399	HIP1R/PDGFRB	2
GO:0042158	lipoprotein biosynthetic process	2/998	12/16374	0.163567	0.505073	0.451399	ATG7/APOE	2
GO:0042308	negative regulation of protein import into nucleus	2/998	12/16374	0.163567	0.505073	0.451399	PKIA/SUFU	2
GO:0043954	cellular component maintenance	2/998	12/16374	0.163567	0.505073	0.451399	PRNP/APOE	2
GO:0046834	lipid phosphorylation	2/998	12/16374	0.163567	0.505073	0.451399	DGKG/DGKZ	2
GO:0046949	fatty-acyl-CoA biosynthetic process	2/998	12/16374	0.163567	0.505073	0.451399	SCD5/FASN	2
GO:0048333	mesodermal cell differentiation	2/998	12/16374	0.163567	0.505073	0.451399	FGFR2/ITGB4	2
GO:0071257	cellular response to electrical stimulus	2/998	12/16374	0.163567	0.505073	0.451399	NSMF/PALM	2
GO:0072234	metanephric nephron tubule development	2/998	12/16374	0.163567	0.505073	0.451399	LGR4/HES5	2
GO:0098915	membrane repolarization during ventricular cardiac muscle cell action potential	2/998	12/16374	0.163567	0.505073	0.451399	KCND3/KCNE4	2
GO:0098962	regulation of postsynaptic neurotransmitter receptor activity	2/998	12/16374	0.163567	0.505073	0.451399	NPTXR/AKAP9	2
GO:0099645	neurotransmitter receptor localization to postsynaptic specialization membrane	2/998	12/16374	0.163567	0.505073	0.451399	LGI1/IQSEC2	2
GO:2000146	negative regulation of cell motility	2/998	12/16374	0.163567	0.505073	0.451399	FRMD5/FBLN1	2
GO:0070374	positive regulation of ERK1 and ERK2 cascade	14/998	172/16374	0.165483	0.505073	0.451399	ERBB4/ARRB1/FGFR3/ADRA1A/GAREM1/FGFR2/PDGFRB/FGF2/PRKCA/MT3/NRP1/NDRG4/BMPER/APOE	14
GO:0001756	somitogenesis	6/998	61/16374	0.166204	0.505073	0.451399	PLXNA2/ABI1/COBL/CRB2/LFNG/SMAD3	6
GO:0045669	positive regulation of osteoblast differentiation	6/998	61/16374	0.166204	0.505073	0.451399	GJA1/GLI3/ZHX3/MEF2C/IL6ST/CTNNBIP1	6
GO:0050790	regulation of catalytic activity	5/998	48/16374	0.166454	0.505073	0.451399	SIRPA/SGK1/RALGDS/BAG3/GPSM2	5
GO:0001654	eye development	13/998	158/16374	0.167121	0.505073	0.451399	NTRK2/GJA1/MERTK/CST3/RORB/EPHB1/SOX9/GLI3/VEGFA/FREM2/TGFB2/LIMK2/CHRDL1	13
GO:0060333	interferon-gamma-mediated signaling pathway	8/998	88/16374	0.167239	0.505073	0.451399	CAMK2G/CAMK2B/CAMK2A/MT2A/TRIM8/PIAS1/IRF2/JAK1	8
GO:0006886	intracellular protein transport	19/998	245/16374	0.167373	0.505073	0.451399	RAPGEF3/ZIC1/TCF7L2/GLI3/SYTL4/RAMP1/TOM1L2/SORL1/BCAS3/RHOB/BAG3/WLS/MYO6/CD81/PIK3R1/KIF13A/SMAD3/PKIA/SUFU	19
GO:0016192	vesicle-mediated transport	25/998	334/16374	0.168206	0.505073	0.451399	STXBP5/GSN/MERTK/FMN2/SIRPA/CPNE6/HIP1R/SYTL4/BCR/STXBP6/CAMK1D/CADPS2/HHIPL1/ABR/CD47/NRP1/VAV3/KALRN/NDRG4/ITGAV/EEF2K/SCARB1/KIF13A/SYT11/APOE	25
GO:0010976	positive regulation of neuron projection development	9/998	102/16374	0.169016	0.505073	0.451399	CNTN1/NTRK2/CAMK2B/MAGI2/CAMK1D/AGT/NDRG4/APOE/ARSB	9
GO:0007030	Golgi organization	7/998	75/16374	0.171729	0.505073	0.451399	SYNE1/PDE4DIP/BCAS3/RAB30/GOLGB1/AKAP9/TRIP11	7
GO:1901137	carbohydrate derivative biosynthetic process	7/998	75/16374	0.171729	0.505073	0.451399	BCL2/ST6GALNAC3/FUT10/FUT9/MAN2A1/NPC1/TRIP11	7
GO:0001766	membrane raft polarization	1/998	3/16374	0.171942	0.505073	0.451399	MAL	1
GO:0002353	plasma kallikrein-kinin cascade	1/998	3/16374	0.171942	0.505073	0.451399	KLKB1	1
GO:0002541	activation of plasma proteins involved in acute inflammatory response	1/998	3/16374	0.171942	0.505073	0.451399	KLKB1	1
GO:0002667	regulation of T cell anergy	1/998	3/16374	0.171942	0.505073	0.451399	PHLPP1	1
GO:0003051	angiotensin-mediated drinking behavior	1/998	3/16374	0.171942	0.505073	0.451399	AGT	1
GO:0003097	renal water transport	1/998	3/16374	0.171942	0.505073	0.451399	AQP1	1
GO:0003275	apoptotic process involved in outflow tract morphogenesis	1/998	3/16374	0.171942	0.505073	0.451399	TGFB2	1
GO:0003321	positive regulation of blood pressure by epinephrine-norepinephrine	1/998	3/16374	0.171942	0.505073	0.451399	ADRA1A	1
GO:0003408	optic cup formation involved in camera-type eye development	1/998	3/16374	0.171942	0.505073	0.451399	ARID1A	1
GO:0005989	lactose biosynthetic process	1/998	3/16374	0.171942	0.505073	0.451399	SLC2A1	1
GO:0006499	N-terminal protein myristoylation	1/998	3/16374	0.171942	0.505073	0.451399	PPM1B	1
GO:0006565	L-serine catabolic process	1/998	3/16374	0.171942	0.505073	0.451399	SDS	1
GO:0006642	triglyceride mobilization	1/998	3/16374	0.171942	0.505073	0.451399	LPIN1	1
GO:0006655	phosphatidylglycerol biosynthetic process	1/998	3/16374	0.171942	0.505073	0.451399	SLC27A1	1
GO:0006677	glycosylceramide metabolic process	1/998	3/16374	0.171942	0.505073	0.451399	ST6GALNAC3	1
GO:0007176	regulation of epidermal growth factor-activated receptor activity	1/998	3/16374	0.171942	0.505073	0.451399	NCK2	1
GO:0007181	transforming growth factor beta receptor complex assembly	1/998	3/16374	0.171942	0.505073	0.451399	TGFBR3	1
GO:0007386	compartment pattern specification	1/998	3/16374	0.171942	0.505073	0.451399	LFNG	1
GO:0009449	gamma-aminobutyric acid biosynthetic process	1/998	3/16374	0.171942	0.505073	0.451399	SLC1A3	1
GO:0009957	epidermal cell fate specification	1/998	3/16374	0.171942	0.505073	0.451399	PTCH1	1
GO:0010574	regulation of vascular endothelial growth factor production	1/998	3/16374	0.171942	0.505073	0.451399	NDRG2	1
GO:0010623	programmed cell death involved in cell development	1/998	3/16374	0.171942	0.505073	0.451399	BCL2	1
GO:0010643	cell communication by chemical coupling	1/998	3/16374	0.171942	0.505073	0.451399	GJA1	1
GO:0010664	negative regulation of striated muscle cell apoptotic process	1/998	3/16374	0.171942	0.505073	0.451399	BAG3	1
GO:0010766	negative regulation of sodium ion transport	1/998	3/16374	0.171942	0.505073	0.451399	SERPINE2	1
GO:0010909	positive regulation of heparan sulfate proteoglycan biosynthetic process	1/998	3/16374	0.171942	0.505073	0.451399	TCF7L2	1
GO:0014054	positive regulation of gamma-aminobutyric acid secretion	1/998	3/16374	0.171942	0.505073	0.451399	SLC6A1	1
GO:0014061	regulation of norepinephrine secretion	1/998	3/16374	0.171942	0.505073	0.451399	AGT	1
GO:0014873	response to muscle activity involved in regulation of muscle adaptation	1/998	3/16374	0.171942	0.505073	0.451399	AGT	1
GO:0014878	response to electrical stimulus involved in regulation of muscle adaptation	1/998	3/16374	0.171942	0.505073	0.451399	PPARGC1A	1
GO:0015734	taurine transport	1/998	3/16374	0.171942	0.505073	0.451399	LRRC8A	1
GO:0019065	receptor-mediated endocytosis of virus by host cell	1/998	3/16374	0.171942	0.505073	0.451399	EPS15	1
GO:0019218	regulation of steroid metabolic process	1/998	3/16374	0.171942	0.505073	0.451399	RORA	1
GO:0019276	UDP-N-acetylgalactosamine metabolic process	1/998	3/16374	0.171942	0.505073	0.451399	CSGALNACT1	1
GO:0019740	nitrogen utilization	1/998	3/16374	0.171942	0.505073	0.451399	BCL2	1
GO:0021502	neural fold elevation formation	1/998	3/16374	0.171942	0.505073	0.451399	HIF1A	1
GO:0021586	pons maturation	1/998	3/16374	0.171942	0.505073	0.451399	GRIN1	1
GO:0021747	cochlear nucleus development	1/998	3/16374	0.171942	0.505073	0.451399	BCL2	1
GO:0021815	modulation of microtubule cytoskeleton involved in cerebral cortex radial glia guided migration	1/998	3/16374	0.171942	0.505073	0.451399	SUN2	1
GO:0021817	nucleokinesis involved in cell motility in cerebral cortex radial glia guided migration	1/998	3/16374	0.171942	0.505073	0.451399	SUN2	1
GO:0021828	gonadotrophin-releasing hormone neuronal migration to the hypothalamus	1/998	3/16374	0.171942	0.505073	0.451399	NRP1	1
GO:0021849	neuroblast division in subventricular zone	1/998	3/16374	0.171942	0.505073	0.451399	NUMB	1
GO:0021999	neural plate anterior/posterior regionalization	1/998	3/16374	0.171942	0.505073	0.451399	SSBP3	1
GO:0022616	DNA strand elongation	1/998	3/16374	0.171942	0.505073	0.451399	NUCKS1	1
GO:0030185	nitric oxide transport	1/998	3/16374	0.171942	0.505073	0.451399	AQP1	1
GO:0030200	heparan sulfate proteoglycan catabolic process	1/998	3/16374	0.171942	0.505073	0.451399	GPC1	1
GO:0031344	regulation of cell projection organization	1/998	3/16374	0.171942	0.505073	0.451399	SEMA4D	1
GO:0031952	regulation of protein autophosphorylation	1/998	3/16374	0.171942	0.505073	0.451399	EEF2K	1
GO:0032095	regulation of response to food	1/998	3/16374	0.171942	0.505073	0.451399	MT3	1
GO:0032350	regulation of hormone metabolic process	1/998	3/16374	0.171942	0.505073	0.451399	TCF7L2	1
GO:0032383	regulation of intracellular cholesterol transport	1/998	3/16374	0.171942	0.505073	0.451399	ABCA2	1
GO:0032484	Ral protein signal transduction	1/998	3/16374	0.171942	0.505073	0.451399	RALGPS1	1
GO:0032485	regulation of Ral protein signal transduction	1/998	3/16374	0.171942	0.505073	0.451399	RALGPS1	1
GO:0032610	interleukin-1 alpha production	1/998	3/16374	0.171942	0.505073	0.451399	S100A13	1
GO:0032907	transforming growth factor beta3 production	1/998	3/16374	0.171942	0.505073	0.451399	SMAD3	1
GO:0033058	directional locomotion	1/998	3/16374	0.171942	0.505073	0.451399	GRIN2C	1
GO:0033326	cerebrospinal fluid secretion	1/998	3/16374	0.171942	0.505073	0.451399	AQP1	1
GO:0033688	regulation of osteoblast proliferation	1/998	3/16374	0.171942	0.505073	0.451399	FGFR2	1
GO:0034111	negative regulation of homotypic cell-cell adhesion	1/998	3/16374	0.171942	0.505073	0.451399	ZNF703	1
GO:0034465	response to carbon monoxide	1/998	3/16374	0.171942	0.505073	0.451399	KCNMA1	1
GO:0034756	regulation of iron ion transport	1/998	3/16374	0.171942	0.505073	0.451399	TF	1
GO:0034767	positive regulation of ion transmembrane transport	1/998	3/16374	0.171942	0.505073	0.451399	SLC9A3R1	1
GO:0035359	negative regulation of peroxisome proliferator activated receptor signaling pathway	1/998	3/16374	0.171942	0.505073	0.451399	PLIN5	1
GO:0035426	extracellular matrix-cell signaling	1/998	3/16374	0.171942	0.505073	0.451399	NDP	1
GO:0035633	maintenance of blood-brain barrier	1/998	3/16374	0.171942	0.505073	0.451399	MBP	1
GO:0035669	TRAM-dependent toll-like receptor 4 signaling pathway	1/998	3/16374	0.171942	0.505073	0.451399	RAB11FIP2	1
GO:0035783	CD4-positive, alpha-beta T cell costimulation	1/998	3/16374	0.171942	0.505073	0.451399	CD81	1
GO:0035789	metanephric mesenchymal cell migration	1/998	3/16374	0.171942	0.505073	0.451399	PDGFRB	1
GO:0035793	positive regulation of metanephric mesenchymal cell migration by platelet-derived growth factor receptor-beta signaling pathway	1/998	3/16374	0.171942	0.505073	0.451399	PDGFRB	1
GO:0035984	cellular response to trichostatin A	1/998	3/16374	0.171942	0.505073	0.451399	MEF2C	1
GO:0036315	cellular response to sterol	1/998	3/16374	0.171942	0.505073	0.451399	RORA	1
GO:0038189	neuropilin signaling pathway	1/998	3/16374	0.171942	0.505073	0.451399	NRP1	1
GO:0042278	purine nucleoside metabolic process	1/998	3/16374	0.171942	0.505073	0.451399	MACROD2	1
GO:0042360	vitamin E metabolic process	1/998	3/16374	0.171942	0.505073	0.451399	TTPA	1
GO:0042668	auditory receptor cell fate determination	1/998	3/16374	0.171942	0.505073	0.451399	HES5	1
GO:0042699	follicle-stimulating hormone signaling pathway	1/998	3/16374	0.171942	0.505073	0.451399	ARRB1	1
GO:0042760	very long-chain fatty acid catabolic process	1/998	3/16374	0.171942	0.505073	0.451399	ABCD2	1
GO:0042816	vitamin B6 metabolic process	1/998	3/16374	0.171942	0.505073	0.451399	PDXK	1
GO:0042908	xenobiotic transport	1/998	3/16374	0.171942	0.505073	0.451399	SLC2A1	1
GO:0042998	positive regulation of Golgi to plasma membrane protein transport	1/998	3/16374	0.171942	0.505073	0.451399	ACSL3	1
GO:0043067	regulation of programmed cell death	1/998	3/16374	0.171942	0.505073	0.451399	CST3	1
GO:0043201	response to leucine	1/998	3/16374	0.171942	0.505073	0.451399	PPARGC1A	1
GO:0043585	nose morphogenesis	1/998	3/16374	0.171942	0.505073	0.451399	GLI3	1
GO:0044336	canonical Wnt signaling pathway involved in negative regulation of apoptotic process	1/998	3/16374	0.171942	0.505073	0.451399	MITF	1
GO:0044406	adhesion of symbiont to host	1/998	3/16374	0.171942	0.505073	0.451399	SCARB1	1
GO:0044752	response to human chorionic gonadotropin	1/998	3/16374	0.171942	0.505073	0.451399	GCLC	1
GO:0044803	multi-organism membrane organization	1/998	3/16374	0.171942	0.505073	0.451399	FCHSD2	1
GO:0045218	zonula adherens maintenance	1/998	3/16374	0.171942	0.505073	0.451399	PLEKHA7	1
GO:0045607	regulation of inner ear auditory receptor cell differentiation	1/998	3/16374	0.171942	0.505073	0.451399	HES5	1
GO:0045715	negative regulation of low-density lipoprotein particle receptor biosynthetic process	1/998	3/16374	0.171942	0.505073	0.451399	ITGAV	1
GO:0045726	positive regulation of integrin biosynthetic process	1/998	3/16374	0.171942	0.505073	0.451399	TGFB2	1
GO:0046320	regulation of fatty acid oxidation	1/998	3/16374	0.171942	0.505073	0.451399	PDK4	1
GO:0046639	negative regulation of alpha-beta T cell differentiation	1/998	3/16374	0.171942	0.505073	0.451399	GLI3	1
GO:0046878	positive regulation of saliva secretion	1/998	3/16374	0.171942	0.505073	0.451399	AQP1	1
GO:0046886	positive regulation of hormone biosynthetic process	1/998	3/16374	0.171942	0.505073	0.451399	HIF1A	1
GO:0046947	hydroxylysine biosynthetic process	1/998	3/16374	0.171942	0.505073	0.451399	PLOD2	1
GO:0048499	synaptic vesicle membrane organization	1/998	3/16374	0.171942	0.505073	0.451399	SYNGR1	1
GO:0048633	positive regulation of skeletal muscle tissue growth	1/998	3/16374	0.171942	0.505073	0.451399	MTM1	1
GO:0048682	sprouting of injured axon	1/998	3/16374	0.171942	0.505073	0.451399	NTRK3	1
GO:0048753	pigment granule organization	1/998	3/16374	0.171942	0.505073	0.451399	BCL2	1
GO:0050819	negative regulation of coagulation	1/998	3/16374	0.171942	0.505073	0.451399	HS3ST5	1
GO:0051795	positive regulation of timing of catagen	1/998	3/16374	0.171942	0.505073	0.451399	TGFB2	1
GO:0051835	positive regulation of synapse structural plasticity	1/998	3/16374	0.171942	0.505073	0.451399	FRMPD4	1
GO:0060024	rhythmic synaptic transmission	1/998	3/16374	0.171942	0.505073	0.451399	NLGN3	1
GO:0060025	regulation of synaptic activity	1/998	3/16374	0.171942	0.505073	0.451399	MEF2C	1
GO:0060083	smooth muscle contraction involved in micturition	1/998	3/16374	0.171942	0.505073	0.451399	KCNMA1	1
GO:0060086	circadian temperature homeostasis	1/998	3/16374	0.171942	0.505073	0.451399	NR1D1	1
GO:0060120	inner ear receptor cell fate commitment	1/998	3/16374	0.171942	0.505073	0.451399	HES5	1
GO:0060143	positive regulation of syncytium formation by plasma membrane fusion	1/998	3/16374	0.171942	0.505073	0.451399	RAPGEF3	1
GO:0060193	positive regulation of lipase activity	1/998	3/16374	0.171942	0.505073	0.451399	PLIN5	1
GO:0060309	elastin catabolic process	1/998	3/16374	0.171942	0.505073	0.451399	CST3	1
GO:0060414	aorta smooth muscle tissue morphogenesis	1/998	3/16374	0.171942	0.505073	0.451399	MYLK	1
GO:0060523	prostate epithelial cord elongation	1/998	3/16374	0.171942	0.505073	0.451399	FGFR2	1
GO:0060528	secretory columnal luminar epithelial cell differentiation involved in prostate glandular acinus development	1/998	3/16374	0.171942	0.505073	0.451399	RXRA	1
GO:0060596	mammary placode formation	1/998	3/16374	0.171942	0.505073	0.451399	NRG3	1
GO:0060648	mammary gland bud morphogenesis	1/998	3/16374	0.171942	0.505073	0.451399	FGFR2	1
GO:0060688	regulation of morphogenesis of a branching structure	1/998	3/16374	0.171942	0.505073	0.451399	FGFR2	1
GO:0060939	epicardium-derived cardiac fibroblast cell development	1/998	3/16374	0.171942	0.505073	0.451399	TGFBR3	1
GO:0060948	cardiac vascular smooth muscle cell development	1/998	3/16374	0.171942	0.505073	0.451399	VEGFA	1
GO:0061107	seminal vesicle development	1/998	3/16374	0.171942	0.505073	0.451399	SERPINE2	1
GO:0061110	dense core granule biogenesis	1/998	3/16374	0.171942	0.505073	0.451399	PRKCA	1
GO:0061357	positive regulation of Wnt protein secretion	1/998	3/16374	0.171942	0.505073	0.451399	WLS	1
GO:0061548	ganglion development	1/998	3/16374	0.171942	0.505073	0.451399	NRP1	1
GO:0070291	N-acylethanolamine metabolic process	1/998	3/16374	0.171942	0.505073	0.451399	GDPD1	1
GO:0070649	formin-nucleated actin cable assembly	1/998	3/16374	0.171942	0.505073	0.451399	FMN2	1
GO:0070837	dehydroascorbic acid transport	1/998	3/16374	0.171942	0.505073	0.451399	SLC2A1	1
GO:0070859	positive regulation of bile acid biosynthetic process	1/998	3/16374	0.171942	0.505073	0.451399	NR1D1	1
GO:0071288	cellular response to mercury ion	1/998	3/16374	0.171942	0.505073	0.451399	AQP1	1
GO:0071386	cellular response to corticosterone stimulus	1/998	3/16374	0.171942	0.505073	0.451399	FOXO3	1
GO:0071461	cellular response to redox state	1/998	3/16374	0.171942	0.505073	0.451399	VASN	1
GO:0071641	negative regulation of macrophage inflammatory protein 1 alpha production	1/998	3/16374	0.171942	0.505073	0.451399	SIRPA	1
GO:0071731	response to nitric oxide	1/998	3/16374	0.171942	0.505073	0.451399	EGLN1	1
GO:0071801	regulation of podosome assembly	1/998	3/16374	0.171942	0.505073	0.451399	GSN	1
GO:0071871	response to epinephrine	1/998	3/16374	0.171942	0.505073	0.451399	PPARGC1A	1
GO:0072034	renal vesicle induction	1/998	3/16374	0.171942	0.505073	0.451399	SOX9	1
GO:0072102	glomerulus morphogenesis	1/998	3/16374	0.171942	0.505073	0.451399	MEF2C	1
GO:0072190	ureter urothelium development	1/998	3/16374	0.171942	0.505073	0.451399	SOX9	1
GO:0072191	ureter smooth muscle development	1/998	3/16374	0.171942	0.505073	0.451399	SOX9	1
GO:0072262	metanephric glomerular mesangial cell proliferation involved in metanephros development	1/998	3/16374	0.171942	0.505073	0.451399	PDGFRB	1
GO:0072276	metanephric glomerulus vasculature morphogenesis	1/998	3/16374	0.171942	0.505073	0.451399	PDGFRB	1
GO:0072277	metanephric glomerular capillary formation	1/998	3/16374	0.171942	0.505073	0.451399	PDGFRB	1
GO:0072350	tricarboxylic acid metabolic process	1/998	3/16374	0.171942	0.505073	0.451399	GLUD1	1
GO:0072513	positive regulation of secondary heart field cardioblast proliferation	1/998	3/16374	0.171942	0.505073	0.451399	EYA1	1
GO:0075206	obsolete positive regulation by host of symbiont cAMP-mediated signal transduction	1/998	3/16374	0.171942	0.505073	0.451399	CALM1	1
GO:0086100	endothelin receptor signaling pathway	1/998	3/16374	0.171942	0.505073	0.451399	EDNRB	1
GO:0089700	protein kinase D signaling	1/998	3/16374	0.171942	0.505073	0.451399	VEGFA	1
GO:0090258	negative regulation of mitochondrial fission	1/998	3/16374	0.171942	0.505073	0.451399	PPARGC1A	1
GO:0090272	negative regulation of fibroblast growth factor production	1/998	3/16374	0.171942	0.505073	0.451399	RGCC	1
GO:0090360	platelet-derived growth factor production	1/998	3/16374	0.171942	0.505073	0.451399	NDRG2	1
GO:0090716	adaptive immune memory response	1/998	3/16374	0.171942	0.505073	0.451399	CD81	1
GO:0097155	fasciculation of sensory neuron axon	1/998	3/16374	0.171942	0.505073	0.451399	EPHA4	1
GO:0097176	epoxide metabolic process	1/998	3/16374	0.171942	0.505073	0.451399	EPHX1	1
GO:0097195	pilomotor reflex	1/998	3/16374	0.171942	0.505073	0.451399	ADRA1A	1
GO:0097325	melanocyte proliferation	1/998	3/16374	0.171942	0.505073	0.451399	FAP	1
GO:0097374	sensory neuron axon guidance	1/998	3/16374	0.171942	0.505073	0.451399	NRP1	1
GO:0098840	protein transport along microtubule	1/998	3/16374	0.171942	0.505073	0.451399	BAG3	1
GO:0098910	regulation of atrial cardiac muscle cell action potential	1/998	3/16374	0.171942	0.505073	0.451399	ANK2	1
GO:0098912	membrane depolarization during atrial cardiac muscle cell action potential	1/998	3/16374	0.171942	0.505073	0.451399	CACNB2	1
GO:0098921	retrograde trans-synaptic signaling by endocannabinoid	1/998	3/16374	0.171942	0.505073	0.451399	PLCB1	1
GO:0098963	dendritic transport of messenger ribonucleoprotein complex	1/998	3/16374	0.171942	0.505073	0.451399	PURA	1
GO:0099183	trans-synaptic signaling by BDNF, modulating synaptic transmission	1/998	3/16374	0.171942	0.505073	0.451399	NTRK2	1
GO:0099542	trans-synaptic signaling by endocannabinoid	1/998	3/16374	0.171942	0.505073	0.451399	PLCB1	1
GO:0120011	intermembrane sterol transfer	1/998	3/16374	0.171942	0.505073	0.451399	GRAMD1C	1
GO:0150020	basal dendrite arborization	1/998	3/16374	0.171942	0.505073	0.451399	NRP1	1
GO:1900042	positive regulation of interleukin-2 secretion	1/998	3/16374	0.171942	0.505073	0.451399	SPTBN1	1
GO:1900449	regulation of glutamate receptor signaling pathway	1/998	3/16374	0.171942	0.505073	0.451399	PRNP	1
GO:1901031	regulation of response to reactive oxygen species	1/998	3/16374	0.171942	0.505073	0.451399	SESN1	1
GO:1901201	regulation of extracellular matrix assembly	1/998	3/16374	0.171942	0.505073	0.451399	AGT	1
GO:1902174	positive regulation of keratinocyte apoptotic process	1/998	3/16374	0.171942	0.505073	0.451399	GSN	1
GO:1902287	semaphorin-plexin signaling pathway involved in axon guidance	1/998	3/16374	0.171942	0.505073	0.451399	NRP1	1
GO:1902603	carnitine transmembrane transport	1/998	3/16374	0.171942	0.505073	0.451399	SLC22A5	1
GO:1902951	negative regulation of dendritic spine maintenance	1/998	3/16374	0.171942	0.505073	0.451399	PRNP	1
GO:1902988	neurofibrillary tangle assembly	1/998	3/16374	0.171942	0.505073	0.451399	SORL1	1
GO:1902992	negative regulation of amyloid precursor protein catabolic process	1/998	3/16374	0.171942	0.505073	0.451399	PRNP	1
GO:1902995	positive regulation of phospholipid efflux	1/998	3/16374	0.171942	0.505073	0.451399	APOE	1
GO:1903288	positive regulation of potassium ion import across plasma membrane	1/998	3/16374	0.171942	0.505073	0.451399	ATP1B2	1
GO:1903375	facioacoustic ganglion development	1/998	3/16374	0.171942	0.505073	0.451399	NRP1	1
GO:1903598	positive regulation of gap junction assembly	1/998	3/16374	0.171942	0.505073	0.451399	AGT	1
GO:1904059	regulation of locomotor rhythm	1/998	3/16374	0.171942	0.505073	0.451399	ZFHX3	1
GO:1904219	positive regulation of CDP-diacylglycerol-serine O-phosphatidyltransferase activity	1/998	3/16374	0.171942	0.505073	0.451399	SERINC5	1
GO:1904222	positive regulation of serine C-palmitoyltransferase activity	1/998	3/16374	0.171942	0.505073	0.451399	SERINC5	1
GO:1904395	positive regulation of skeletal muscle acetylcholine-gated channel clustering	1/998	3/16374	0.171942	0.505073	0.451399	LRP4	1
GO:1904640	response to methionine	1/998	3/16374	0.171942	0.505073	0.451399	PPARGC1A	1
GO:1904693	midbrain morphogenesis	1/998	3/16374	0.171942	0.505073	0.451399	FZD3	1
GO:1904715	negative regulation of chaperone-mediated autophagy	1/998	3/16374	0.171942	0.505073	0.451399	SNRNP70	1
GO:1904749	regulation of protein localization to nucleolus	1/998	3/16374	0.171942	0.505073	0.451399	GLUL	1
GO:1904891	positive regulation of excitatory synapse assembly	1/998	3/16374	0.171942	0.505073	0.451399	SEMA4A	1
GO:1905224	clathrin-coated pit assembly	1/998	3/16374	0.171942	0.505073	0.451399	SYT11	1
GO:1905244	regulation of modification of synaptic structure	1/998	3/16374	0.171942	0.505073	0.451399	EPHA4	1
GO:1905636	positive regulation of RNA polymerase II regulatory region sequence-specific DNA binding	1/998	3/16374	0.171942	0.505073	0.451399	ENHO	1
GO:1905684	regulation of plasma membrane repair	1/998	3/16374	0.171942	0.505073	0.451399	SYTL4	1
GO:1990120	messenger ribonucleoprotein complex assembly	1/998	3/16374	0.171942	0.505073	0.451399	CPSF7	1
GO:2000111	positive regulation of macrophage apoptotic process	1/998	3/16374	0.171942	0.505073	0.451399	MEF2C	1
GO:2000138	positive regulation of cell proliferation involved in heart morphogenesis	1/998	3/16374	0.171942	0.505073	0.451399	SOX9	1
GO:2000297	negative regulation of synapse maturation	1/998	3/16374	0.171942	0.505073	0.451399	NFATC4	1
GO:2000312	regulation of kainate selective glutamate receptor activity	1/998	3/16374	0.171942	0.505073	0.451399	KLHL24	1
GO:2000544	regulation of endothelial cell chemotaxis to fibroblast growth factor	1/998	3/16374	0.171942	0.505073	0.451399	FGF2	1
GO:2000588	positive regulation of platelet-derived growth factor receptor-beta signaling pathway	1/998	3/16374	0.171942	0.505073	0.451399	HIP1R	1
GO:2000807	regulation of synaptic vesicle clustering	1/998	3/16374	0.171942	0.505073	0.451399	PCDH17	1
GO:2000974	negative regulation of pro-B cell differentiation	1/998	3/16374	0.171942	0.505073	0.451399	HES5	1
GO:2001190	positive regulation of T cell activation via T cell receptor contact with antigen bound to MHC molecule on antigen presenting cell	1/998	3/16374	0.171942	0.505073	0.451399	CD81	1
GO:2001288	positive regulation of caveolin-mediated endocytosis	1/998	3/16374	0.171942	0.505073	0.451399	ITSN1	1
GO:0044238	primary metabolic process	13/998	159/16374	0.172554	0.506514	0.452686	ME1/WFS1/NCOA1/PSMA1/AGT/PLPP1/NR1D1/SLC27A1/NR1D2/FDFT1/PPARA/RXRA/APOE	13
GO:0006821	chloride transport	4/998	36/16374	0.174196	0.509901	0.455714	TTYH1/FXYD1/ANO5/ANO8	4
GO:0032465	regulation of cytokinesis	4/998	36/16374	0.174196	0.509901	0.455714	GIT1/CALM1/AHCTF1/KIF13A	4
GO:0086091	regulation of heart rate by cardiac conduction	4/998	36/16374	0.174196	0.509901	0.455714	CACNB2/ANK2/KCND3/AKAP9	4
GO:0150063	visual system development	4/998	36/16374	0.174196	0.509901	0.455714	CST3/FREM2/TGFB2/CHRDL1	4
GO:0002062	chondrocyte differentiation	8/998	89/16374	0.174659	0.510543	0.456287	FGFR3/SOX9/PTH1R/GLI3/ZBTB16/MEF2C/RARB/SMAD3	8
GO:0030326	embryonic limb morphogenesis	8/998	89/16374	0.174659	0.510543	0.456287	GJA1/LRP4/GLI3/PRRX1/ZBTB16/PTCH1/FREM2/TGFB2	8
GO:0003206	cardiac chamber morphogenesis	6/998	62/16374	0.17522	0.511108	0.456792	FGFR2/TGFBR3/TGFB2/MEF2C/RXRA/EGLN1	6
GO:0006869	lipid transport	6/998	62/16374	0.17522	0.511108	0.456792	PCTP/SORL1/ITGAV/TEX2/ESYT2/APOE	6
GO:0048754	branching morphogenesis of an epithelial tube	6/998	62/16374	0.17522	0.511108	0.456792	LGR4/SOX9/FGFR2/CTSH/AGT/VEGFA	6
GO:0010951	negative regulation of endopeptidase activity	9/998	103/16374	0.175915	0.511775	0.457389	PAPLN/CST3/SPOCK1/CRB2/A2ML1/COL28A1/CD109/GAPDH/CRIM1	9
GO:0032956	regulation of actin cytoskeleton organization	5/998	49/16374	0.176743	0.511775	0.457389	EFNA5/DLC1/FAM107A/HIP1R/PDGFRB	5
GO:0060395	SMAD protein signal transduction	5/998	49/16374	0.176743	0.511775	0.457389	MAGI2/SPTBN1/RBPMS/TGFB2/SMAD3	5
GO:0000132	establishment of mitotic spindle orientation	3/998	24/16374	0.177407	0.511775	0.457389	NUMA1/MCPH1/GPSM2	3
GO:0007435	salivary gland morphogenesis	3/998	24/16374	0.177407	0.511775	0.457389	LAMA1/FGFR2/TGFB2	3
GO:0019934	cGMP-mediated signaling	3/998	24/16374	0.177407	0.511775	0.457389	AQP1/EDNRB/APOE	3
GO:0022411	cellular component disassembly	3/998	24/16374	0.177407	0.511775	0.457389	CST3/FAP/BNIP3	3
GO:0031069	hair follicle morphogenesis	3/998	24/16374	0.177407	0.511775	0.457389	BCL2/FGFR2/TGFB2	3
GO:0042551	neuron maturation	3/998	24/16374	0.177407	0.511775	0.457389	LGI4/BCL2/EDNRB	3
GO:0045907	positive regulation of vasoconstriction	3/998	24/16374	0.177407	0.511775	0.457389	GJA1/ADRA1A/CD38	3
GO:0046686	response to cadmium ion	3/998	24/16374	0.177407	0.511775	0.457389	MT-CYB/GCLC/NPC1	3
GO:0055072	iron ion homeostasis	3/998	24/16374	0.177407	0.511775	0.457389	NEO1/TF/EPAS1	3
GO:0061647	histone H3-K9 modification	3/998	24/16374	0.177407	0.511775	0.457389	JARID2/ZNF451/KDM3A	3
GO:0062009	secondary palate development	3/998	24/16374	0.177407	0.511775	0.457389	TGFBR3/TGFB2/TSHZ1	3
GO:0070296	sarcoplasmic reticulum calcium ion transport	3/998	24/16374	0.177407	0.511775	0.457389	PDE4D/ANK2/CALM1	3
GO:0090023	positive regulation of neutrophil chemotaxis	3/998	24/16374	0.177407	0.511775	0.457389	RIPOR2/CAMK1D/THBS4	3
GO:0051170	import into nucleus	7/998	76/16374	0.179942	0.51873	0.463604	ZIC1/GLI3/BAG3/PIK3R1/SMAD3/PKIA/SUFU	7
GO:0034341	response to interferon-gamma	8/998	90/16374	0.182223	0.518767	0.463637	CAMK2G/CAMK2B/CAMK2A/MT2A/TRIM8/IRF2/IFITM3/JAK1	8
GO:0017144	drug metabolic process	6/998	63/16374	0.18443	0.518767	0.463637	MT-CO2/ENO1/MT3/NT5C2/CLYBL/PPARGC1A	6
GO:0046034	ATP metabolic process	6/998	63/16374	0.18443	0.518767	0.463637	ATP1A2/MT-CO2/ENO1/SLC25A33/AK4/PPARGC1A	6
GO:0071277	cellular response to calcium ion	6/998	63/16374	0.18443	0.518767	0.463637	RYR3/ADCY8/MEF2C/ITPKB/RYR1/EEF2K	6
GO:0001818	negative regulation of cytokine production	2/998	13/16374	0.185892	0.518767	0.463637	NDRG2/MERTK	2
GO:0001967	suckling behavior	2/998	13/16374	0.185892	0.518767	0.463637	GRIN1/CNTFR	2
GO:0002029	desensitization of G protein-coupled receptor signaling pathway	2/998	13/16374	0.185892	0.518767	0.463637	ARRB1/GRK4	2
GO:0002087	regulation of respiratory gaseous exchange by nervous system process	2/998	13/16374	0.185892	0.518767	0.463637	ATP1A2/NLGN3	2
GO:0006516	glycoprotein catabolic process	2/998	13/16374	0.185892	0.518767	0.463637	CST3/FBXO2	2
GO:0006665	sphingolipid metabolic process	2/998	13/16374	0.185892	0.518767	0.463637	TEX2/SERINC5	2
GO:0006884	cell volume homeostasis	2/998	13/16374	0.185892	0.518767	0.463637	AQP1/LRRC8A	2
GO:0007183	SMAD protein complex assembly	2/998	13/16374	0.185892	0.518767	0.463637	LDLRAD4/SMAD3	2
GO:0007431	salivary gland development	2/998	13/16374	0.185892	0.518767	0.463637	CST3/TGFB2	2
GO:0009743	response to carbohydrate	2/998	13/16374	0.185892	0.518767	0.463637	CST3/ME1	2
GO:0010745	negative regulation of macrophage derived foam cell differentiation	2/998	13/16374	0.185892	0.518767	0.463637	ITGAV/PPARA	2
GO:0010839	negative regulation of keratinocyte proliferation	2/998	13/16374	0.185892	0.518767	0.463637	KLF9/CD109	2
GO:0014829	vascular smooth muscle contraction	2/998	13/16374	0.185892	0.518767	0.463637	DOCK5/DOCK4	2
GO:0014912	negative regulation of smooth muscle cell migration	2/998	13/16374	0.185892	0.518767	0.463637	NDRG4/PPARGC1A	2
GO:0015893	drug transport	2/998	13/16374	0.185892	0.518767	0.463637	SLC15A2/SLC22A5	2
GO:0016024	CDP-diacylglycerol biosynthetic process	2/998	13/16374	0.185892	0.518767	0.463637	CDS1/GPAM	2
GO:0021819	layer formation in cerebral cortex	2/998	13/16374	0.185892	0.518767	0.463637	GLI3/ADGRG1	2
GO:0021978	telencephalon regionalization	2/998	13/16374	0.185892	0.518767	0.463637	EMX2/ADGRG1	2
GO:0022030	telencephalon glial cell migration	2/998	13/16374	0.185892	0.518767	0.463637	GLI3/ADGRG1	2
GO:0022409	positive regulation of cell-cell adhesion	2/998	13/16374	0.185892	0.518767	0.463637	CD47/FSTL3	2
GO:0030048	actin filament-based movement	2/998	13/16374	0.185892	0.518767	0.463637	MYH14/MYO6	2
GO:0030516	regulation of axon extension	2/998	13/16374	0.185892	0.518767	0.463637	DPYSL2/APOE	2
GO:0030837	negative regulation of actin filament polymerization	2/998	13/16374	0.185892	0.518767	0.463637	KANK1/HIP1R	2
GO:0032288	myelin assembly	2/998	13/16374	0.185892	0.518767	0.463637	ANK2/GPC1	2
GO:0032799	low-density lipoprotein receptor particle metabolic process	2/998	13/16374	0.185892	0.518767	0.463637	ITGAV/APOE	2
GO:0034214	protein hexamerization	2/998	13/16374	0.185892	0.518767	0.463637	LRRC8A/MAT2A	2
GO:0034374	low-density lipoprotein particle remodeling	2/998	13/16374	0.185892	0.518767	0.463637	AGT/APOE	2
GO:0034384	high-density lipoprotein particle clearance	2/998	13/16374	0.185892	0.518767	0.463637	SCARB1/APOE	2
GO:0035723	interleukin-15-mediated signaling pathway	2/998	13/16374	0.185892	0.518767	0.463637	PLCB1/JAK1	2
GO:0036109	alpha-linolenic acid metabolic process	2/998	13/16374	0.185892	0.518767	0.463637	FADS2/SCP2	2
GO:0038179	neurotrophin signaling pathway	2/998	13/16374	0.185892	0.518767	0.463637	AGT/NTRK3	2
GO:0042448	progesterone metabolic process	2/998	13/16374	0.185892	0.518767	0.463637	CYP46A1/PPARGC1A	2
GO:0043951	negative regulation of cAMP-mediated signaling	2/998	13/16374	0.185892	0.518767	0.463637	PDE3B/PDE4D	2
GO:0045947	negative regulation of translational initiation	2/998	13/16374	0.185892	0.518767	0.463637	EIF3E/EIF4EBP2	2
GO:0048715	negative regulation of oligodendrocyte differentiation	2/998	13/16374	0.185892	0.518767	0.463637	DAAM2/HES5	2
GO:0050655	dermatan sulfate proteoglycan metabolic process	2/998	13/16374	0.185892	0.518767	0.463637	NCAN/DSE	2
GO:0050710	negative regulation of cytokine secretion	2/998	13/16374	0.185892	0.518767	0.463637	LGR4/RGCC	2
GO:0060219	camera-type eye photoreceptor cell differentiation	2/998	13/16374	0.185892	0.518767	0.463637	NTRK2/RORB	2
GO:0060334	regulation of interferon-gamma-mediated signaling pathway	2/998	13/16374	0.185892	0.518767	0.463637	PIAS1/JAK1	2
GO:0060347	heart trabecula formation	2/998	13/16374	0.185892	0.518767	0.463637	TGFBR3/EGLN1	2
GO:0071350	cellular response to interleukin-15	2/998	13/16374	0.185892	0.518767	0.463637	PLCB1/JAK1	2
GO:0140115	export across plasma membrane	2/998	13/16374	0.185892	0.518767	0.463637	FXYD1/ATP1B2	2
GO:2000810	regulation of bicellular tight junction assembly	2/998	13/16374	0.185892	0.518767	0.463637	GJA1/TJP1	2
GO:0061919	process utilizing autophagic mechanism	12/998	147/16374	0.185912	0.518767	0.463637	ADRA1A/BCL2/TPCN1/FOXO1/PIP4K2A/DAPK1/TRIM8/MT3/BNIP3/ATG7/FOXO3/LEPR	12
GO:0019319	hexose biosynthetic process	4/998	37/16374	0.186569	0.518819	0.463684	FOXO1/PPARA/LEPR/PPARGC1A	4
GO:0050766	positive regulation of phagocytosis	4/998	37/16374	0.186569	0.518819	0.463684	MERTK/BCR/CAMK1D/ABR	4
GO:0019226	transmission of nerve impulse	5/998	50/16374	0.187266	0.518819	0.463684	NTRK2/KCNA2/AGT/MYH14/NTRK3	5
GO:0045600	positive regulation of fat cell differentiation	5/998	50/16374	0.187266	0.518819	0.463684	WIF1/LMO3/ZBTB16/ADIRF/ZBTB7C	5
GO:0097756	negative regulation of blood vessel diameter	5/998	50/16374	0.187266	0.518819	0.463684	ATP1A2/GJA1/ADRA1A/CD38/AGT	5
GO:1903078	positive regulation of protein localization to plasma membrane	5/998	50/16374	0.187266	0.518819	0.463684	SPTBN1/PTPN9/PIK3R1/DPP10/RAB11FIP2	5
GO:0006396	RNA processing	9/998	105/16374	0.190086	0.518819	0.463684	AHNAK/DDX17/PABPN1/RBPMS/MBNL2/RBMS1/PIK3R1/TMTC1/SNRNP70	9
GO:0001941	postsynaptic membrane organization	3/998	25/16374	0.193079	0.518819	0.463684	MAGI2/LRP4/APOE	3
GO:0009755	hormone-mediated signaling pathway	3/998	25/16374	0.193079	0.518819	0.463684	NCOA1/THRA/KDM3A	3
GO:0010906	regulation of glucose metabolic process	3/998	25/16374	0.193079	0.518819	0.463684	RORA/ACACB/PDK4	3
GO:0016331	morphogenesis of embryonic epithelium	3/998	25/16374	0.193079	0.518819	0.463684	FGFR2/HIF1A/ARID1A	3
GO:0022600	digestive system process	3/998	25/16374	0.193079	0.518819	0.463684	AQP1/HIP1R/SGK1	3
GO:0031116	positive regulation of microtubule polymerization	3/998	25/16374	0.193079	0.518819	0.463684	NIN/NUMA1/AKAP9	3
GO:0032984	protein-containing complex disassembly	3/998	25/16374	0.193079	0.518819	0.463684	DDIT4/CLEC16A/BNIP3	3
GO:0046717	acid secretion	3/998	25/16374	0.193079	0.518819	0.463684	HIP1R/SGK1/SLC6A1	3
GO:0055010	ventricular cardiac muscle tissue morphogenesis	3/998	25/16374	0.193079	0.518819	0.463684	FGFR2/TGFBR3/RXRA	3
GO:2001238	positive regulation of extrinsic apoptotic signaling pathway	3/998	25/16374	0.193079	0.518819	0.463684	WWOX/AGT/ITM2C	3
GO:0061371	determination of heart left/right asymmetry	6/998	64/16374	0.193826	0.518819	0.463684	GJA1/HIF1A/MEF2C/NDRG4/SMAD3/SUFU	6
GO:0072655	establishment of protein localization to mitochondrion	6/998	64/16374	0.193826	0.518819	0.463684	MICALL2/SREBF1/RHOU/ABLIM3/BAG3/BNIP3L	6
GO:0007189	adenylate cyclase-activating G protein-coupled receptor signaling pathway	7/998	78/16374	0.196847	0.518819	0.463684	ADCY2/PTH1R/RAMP1/PRKCA/ADCY8/ADCY3/ADCY9	7
GO:0038096	Fc-gamma receptor signaling pathway involved in phagocytosis	7/998	78/16374	0.196847	0.518819	0.463684	ABI1/CD47/VAV3/PLPP4/PIK3R1/WIPF2/ELMO2	7
GO:0043010	camera-type eye development	14/998	178/16374	0.197653	0.518819	0.463684	NTRK2/GJA1/MERTK/RORB/EPHB1/HSF4/SOX9/GLI3/VEGFA/MITF/LIMK2/HES5/GPD2/RXRA	14
GO:0072359	circulatory system development	14/998	178/16374	0.197653	0.518819	0.463684	ERBB4/GJA1/GLI3/NFATC4/CRB2/NTRK3/FREM2/TGFB2/PCSK5/MEF2C/TFDP2/CDKL1/PPARA/GYS1	14
GO:0007626	locomotory behavior	8/998	92/16374	0.197764	0.518819	0.463684	PPP1R1B/CDH23/CACNA1B/ZFHX3/OLFM2/ADCY8/SOBP/ANKH	8
GO:0072332	intrinsic apoptotic signaling pathway by p53 class mediator	5/998	51/16374	0.198008	0.518819	0.463684	WWOX/BCL2/PPP1R13B/TP53BP2/DDX5	5
GO:0034504	protein localization to nucleus	12/998	149/16374	0.198015	0.518819	0.463684	GLUL/ZIC1/SOX9/GLI3/ZBTB16/OTUD7B/TRIM8/BAG3/PIK3R1/SMAD3/PKIA/SUFU	12
GO:0033173	calcineurin-NFAT signaling cascade	4/998	38/16374	0.199214	0.518819	0.463684	CAMTA1/NFAT5/NFATC1/PRNP	4
GO:0042149	cellular response to glucose starvation	4/998	38/16374	0.199214	0.518819	0.463684	BCL2/CPEB4/SLC2A1/SESN1	4
GO:0048880	sensory system development	4/998	38/16374	0.199214	0.518819	0.463684	CST3/FREM2/TGFB2/CHRDL1	4
GO:0003281	ventricular septum development	6/998	65/16374	0.203398	0.518819	0.463684	TGFBR3/TGFB2/FGFRL1/EGLN1/TRIP11/SUFU	6
GO:0006695	cholesterol biosynthetic process	6/998	65/16374	0.203398	0.518819	0.463684	SREBF1/GPAM/ACACB/FDFT1/FASN/APOE	6
GO:0008217	regulation of blood pressure	7/998	79/16374	0.205526	0.518819	0.463684	ATP1A2/ADRA1A/GPR37L1/CACNA1B/SGK1/AGT/EDNRB	7
GO:0006486	protein glycosylation	8/998	93/16374	0.205732	0.518819	0.463684	ST6GALNAC3/RAMP1/FUT10/MT3/FUT9/MAN2A1/NPC1/TRIP11	8
GO:0006631	fatty acid metabolic process	8/998	93/16374	0.205732	0.518819	0.463684	ACOT11/SREBF1/PDK4/CRYL1/FASN/PPARA/ACADVL/PPARGC1A	8
GO:0001696	gastric acid secretion	2/998	14/16374	0.208605	0.518819	0.463684	HIP1R/SGK1	2
GO:0006790	sulfur compound metabolic process	2/998	14/16374	0.208605	0.518819	0.463684	CHST1/CHST6	2
GO:0006817	phosphate ion transport	2/998	14/16374	0.208605	0.518819	0.463684	SLC17A7/CRY2	2
GO:0010248	establishment or maintenance of transmembrane electrochemical gradient	2/998	14/16374	0.208605	0.518819	0.463684	ATP1A2/ATP1B2	2
GO:0010952	positive regulation of peptidase activity	2/998	14/16374	0.208605	0.518819	0.463684	CTSH/FBLN1	2
GO:0016242	negative regulation of macroautophagy	2/998	14/16374	0.208605	0.518819	0.463684	NRBP2/NPC1	2
GO:0021801	cerebral cortex radial glia guided migration	2/998	14/16374	0.208605	0.518819	0.463684	GLI3/ADGRG1	2
GO:0034435	cholesterol esterification	2/998	14/16374	0.208605	0.518819	0.463684	AGT/APOE	2
GO:0035493	SNARE complex assembly	2/998	14/16374	0.208605	0.518819	0.463684	STXBP6/SEPT8	2
GO:0043543	protein acylation	2/998	14/16374	0.208605	0.518819	0.463684	RAPGEF3/TERF2IP	2
GO:0050765	negative regulation of phagocytosis	2/998	14/16374	0.208605	0.518819	0.463684	SIRPA/SYT11	2
GO:0055003	cardiac myofibril assembly	2/998	14/16374	0.208605	0.518819	0.463684	NEBL/PDGFRB	2
GO:0070166	enamel mineralization	2/998	14/16374	0.208605	0.518819	0.463684	FOXO1/PPARA	2
GO:0072112	glomerular visceral epithelial cell differentiation	2/998	14/16374	0.208605	0.518819	0.463684	MAGI2/KLF15	2
GO:0072189	ureter development	2/998	14/16374	0.208605	0.518819	0.463684	SOX9/EMX2	2
GO:0098884	postsynaptic neurotransmitter receptor internalization	2/998	14/16374	0.208605	0.518819	0.463684	EPS15/NUMB	2
GO:1902284	neuron projection extension involved in neuron projection guidance	2/998	14/16374	0.208605	0.518819	0.463684	VEGFA/NRP1	2
GO:1904645	response to amyloid-beta	2/998	14/16374	0.208605	0.518819	0.463684	CACNA1B/PRNP	2
GO:2000311	regulation of AMPA receptor activity	2/998	14/16374	0.208605	0.518819	0.463684	MINK1/MEF2C	2
GO:0034644	cellular response to UV	5/998	52/16374	0.208955	0.518819	0.463684	AQP1/NFATC4/COPS9/PIK3R1/ZBTB1	5
GO:0043086	negative regulation of catalytic activity	5/998	52/16374	0.208955	0.518819	0.463684	TXNIP/ACACB/TMBIM1/ANXA4/PPP1R12B	5
GO:0097553	calcium ion transmembrane import into cytosol	5/998	52/16374	0.208955	0.518819	0.463684	GRIN2C/ANK2/PRNP/GRIN1/TRPC1	5
GO:0015980	energy derivation by oxidation of organic compounds	3/998	26/16374	0.209076	0.518819	0.463684	PRDM16/ACADVL/PPARGC1A	3
GO:0030206	chondroitin sulfate biosynthetic process	3/998	26/16374	0.209076	0.518819	0.463684	CSGALNACT1/NCAN/DSE	3
GO:0031102	neuron projection regeneration	3/998	26/16374	0.209076	0.518819	0.463684	EPHA4/PRRX1/KREMEN1	3
GO:0055074	calcium ion homeostasis	3/998	26/16374	0.209076	0.518819	0.463684	SGCD/WFS1/GRIN1	3
GO:0060074	synapse maturation	3/998	26/16374	0.209076	0.518819	0.463684	CAMK2B/NFATC4/PALM	3
GO:0070372	regulation of ERK1 and ERK2 cascade	3/998	26/16374	0.209076	0.518819	0.463684	EPHB1/FGFR2/TIAM1	3
GO:0008286	insulin receptor signaling pathway	10/998	122/16374	0.209947	0.518819	0.463684	CCND3/SREBF1/KANK1/ENHO/FOXO1/AGT/PDK4/EIF4EBP2/PIK3R1/NUCKS1	10
GO:0030308	negative regulation of cell growth	10/998	122/16374	0.209947	0.518819	0.463684	GJA1/RERG/BCL2/SERPINE2/ENO1/MT3/AGT/TGFB2/DNAJB2/SMAD3	10
GO:0071222	cellular response to lipopolysaccharide	12/998	151/16374	0.210462	0.518819	0.463684	PDE4D/SIRPA/BCR/PABPN1/PLSCR4/NR1D1/EDNRB/MEF2C/CAPN2/SCARB1/AXL/PPARGC1A	12
GO:0009968	negative regulation of signal transduction	4/998	39/16374	0.212107	0.518819	0.463684	ZNRF3/RNF43/RGS11/RGS7	4
GO:0048286	lung alveolus development	4/998	39/16374	0.212107	0.518819	0.463684	FGFR2/TNS3/ERRFI1/MAN2A1	4
GO:2000134	negative regulation of G1/S transition of mitotic cell cycle	4/998	39/16374	0.212107	0.518819	0.463684	CTDSPL/BCL2/FAM107A/FBXO7	4
GO:0045137	development of primary sexual characteristics	9/998	108/16374	0.212228	0.518819	0.463684	GJA1/BCL2/RHOBTB3/SOX9/PDGFRB/NCOA1/TGFB2/FSTL3/MAMLD1	9
GO:0042100	B cell proliferation	6/998	66/16374	0.213137	0.518819	0.463684	BCL2/CD38/VAV3/NFATC2/MEF2C/CD81	6
GO:0007229	integrin-mediated signaling pathway	8/998	94/16374	0.213823	0.518819	0.463684	COL16A1/PLP1/DST/CD47/NRP1/VAV3/ITGA7/ITGAV	8
GO:0043410	positive regulation of MAPK cascade	8/998	94/16374	0.213823	0.518819	0.463684	NTRK2/WWC1/FGFR3/ADRA1A/GPR37L1/FGFR2/ADRA1B/SORBS3	8
GO:0030097	hemopoiesis	11/998	137/16374	0.213866	0.518819	0.463684	FGFR2/TGFBR3/SSBP3/ZBTB16/FUT10/PRKX/TGFB2/FSTL3/MKNK2/TTC7A/IL17D	11
GO:0006805	xenobiotic metabolic process	7/998	80/16374	0.214348	0.518819	0.463684	RORA/CYP2J2/CYB5B/EPHX1/CYP46A1/MGST1/SULT1A1	7
GO:0043687	post-translational protein modification	25/998	346/16374	0.215374	0.518819	0.463684	SPARCL1/HIF3A/CST3/DCUN1D1/WFS1/ZBTB16/PSMA1/SCG3/TF/GAN/ASB3/FBXO2/HIF1A/SDC2/FBXO21/ANKRD9/EPAS1/CHRDL1/FSTL3/GPS1/DCAF6/MGAT4A/ANO8/FBXO7/APOE	25
GO:0032869	cellular response to insulin stimulus	12/998	152/16374	0.216809	0.518819	0.463684	PDE3B/SREBF1/ENHO/FOXO1/CPEB2/PDK4/SLC25A33/EIF4EBP2/ERRFI1/PIK3R1/GCLC/EEF2K	12
GO:0044248	cellular catabolic process	12/998	152/16374	0.216809	0.518819	0.463684	ADRA1A/BCL2/TPCN1/FOXO1/PIP4K2A/DAPK1/TRIM8/MT3/BNIP3/ATG7/FOXO3/LEPR	12
GO:0009888	tissue development	16/998	211/16374	0.217013	0.518819	0.463684	CSGALNACT1/BBS2/SOX9/FGFR2/PRRX1/ZBTB16/VEGFA/ITGB8/FREM2/HIF1A/SNORC/HES5/PGK1/ACADVL/ANXA4/PPARGC1A	16
GO:0003205	cardiac chamber development	5/998	53/16374	0.220092	0.518819	0.463684	HIF1A/PCSK5/ARID1A/TRIP11/SUFU	5
GO:0000041	transition metal ion transport	1/998	4/16374	0.222422	0.518819	0.463684	TF	1
GO:0000052	citrulline metabolic process	1/998	4/16374	0.222422	0.518819	0.463684	DDAH1	1
GO:0000480	endonucleolytic cleavage in 5'-ETS of tricistronic rRNA transcript (SSU-rRNA, 5.8S rRNA, LSU-rRNA)	1/998	4/16374	0.222422	0.518819	0.463684	UTP23	1
GO:0001922	B-1 B cell homeostasis	1/998	4/16374	0.222422	0.518819	0.463684	HIF1A	1
GO:0002018	renin-angiotensin regulation of aldosterone production	1/998	4/16374	0.222422	0.518819	0.463684	AGT	1
GO:0002035	brain renin-angiotensin system	1/998	4/16374	0.222422	0.518819	0.463684	AGT	1
GO:0002067	glandular epithelial cell differentiation	1/998	4/16374	0.222422	0.518819	0.463684	RARB	1
GO:0002159	desmosome assembly	1/998	4/16374	0.222422	0.518819	0.463684	PRKCA	1
GO:0002520	immune system development	1/998	4/16374	0.222422	0.518819	0.463684	SMAD3	1
GO:0002528	regulation of vascular permeability involved in acute inflammatory response	1/998	4/16374	0.222422	0.518819	0.463684	CTNNBIP1	1
GO:0003104	positive regulation of glomerular filtration	1/998	4/16374	0.222422	0.518819	0.463684	GJA1	1
GO:0003188	heart valve formation	1/998	4/16374	0.222422	0.518819	0.463684	SOX9	1
GO:0003274	endocardial cushion fusion	1/998	4/16374	0.222422	0.518819	0.463684	TGFB2	1
GO:0006007	glucose catabolic process	1/998	4/16374	0.222422	0.518819	0.463684	PFKFB2	1
GO:0006465	signal peptide processing	1/998	4/16374	0.222422	0.518819	0.463684	PCSK5	1
GO:0006477	protein sulfation	1/998	4/16374	0.222422	0.518819	0.463684	HS3ST5	1
GO:0006556	S-adenosylmethionine biosynthetic process	1/998	4/16374	0.222422	0.518819	0.463684	MAT2A	1
GO:0006659	phosphatidylserine biosynthetic process	1/998	4/16374	0.222422	0.518819	0.463684	SLC27A1	1
GO:0006663	platelet activating factor biosynthetic process	1/998	4/16374	0.222422	0.518819	0.463684	CHPT1	1
GO:0007023	post-chaperonin tubulin folding pathway	1/998	4/16374	0.222422	0.518819	0.463684	TBCE	1
GO:0007258	JUN phosphorylation	1/998	4/16374	0.222422	0.518819	0.463684	MAPK10	1
GO:0007290	spermatid nucleus elongation	1/998	4/16374	0.222422	0.518819	0.463684	KDM3A	1
GO:0007632	visual behavior	1/998	4/16374	0.222422	0.518819	0.463684	SLC1A2	1
GO:0008626	granzyme-mediated apoptotic signaling pathway	1/998	4/16374	0.222422	0.518819	0.463684	BNIP3	1
GO:0009744	response to sucrose	1/998	4/16374	0.222422	0.518819	0.463684	SLC6A1	1
GO:0009992	cellular water homeostasis	1/998	4/16374	0.222422	0.518819	0.463684	AQP4	1
GO:0010453	regulation of cell fate commitment	1/998	4/16374	0.222422	0.518819	0.463684	FGFR2	1
GO:0010523	negative regulation of calcium ion transport into cytosol	1/998	4/16374	0.222422	0.518819	0.463684	BCL2	1
GO:0010729	positive regulation of hydrogen peroxide biosynthetic process	1/998	4/16374	0.222422	0.518819	0.463684	MT-CO2	1
GO:0010793	regulation of mRNA export from nucleus	1/998	4/16374	0.222422	0.518819	0.463684	AKAP8L	1
GO:0010897	negative regulation of triglyceride catabolic process	1/998	4/16374	0.222422	0.518819	0.463684	PLIN5	1
GO:0014028	notochord formation	1/998	4/16374	0.222422	0.518819	0.463684	CRB2	1
GO:0014034	neural crest cell fate commitment	1/998	4/16374	0.222422	0.518819	0.463684	SOX9	1
GO:0014826	vein smooth muscle contraction	1/998	4/16374	0.222422	0.518819	0.463684	EDNRB	1
GO:0015670	carbon dioxide transport	1/998	4/16374	0.222422	0.518819	0.463684	AQP1	1
GO:0015697	quaternary ammonium group transport	1/998	4/16374	0.222422	0.518819	0.463684	SLC22A5	1
GO:0015808	L-alanine transport	1/998	4/16374	0.222422	0.518819	0.463684	SLC1A4	1
GO:0015811	L-cystine transport	1/998	4/16374	0.222422	0.518819	0.463684	SLC1A4	1
GO:0015879	carnitine transport	1/998	4/16374	0.222422	0.518819	0.463684	SLC22A5	1
GO:0016048	detection of temperature stimulus	1/998	4/16374	0.222422	0.518819	0.463684	TRPM3	1
GO:0017001	antibiotic catabolic process	1/998	4/16374	0.222422	0.518819	0.463684	MT3	1
GO:0018101	protein citrullination	1/998	4/16374	0.222422	0.518819	0.463684	PADI2	1
GO:0019230	proprioception	1/998	4/16374	0.222422	0.518819	0.463684	TMEM150C	1
GO:0019262	N-acetylneuraminate catabolic process	1/998	4/16374	0.222422	0.518819	0.463684	NPL	1
GO:0019563	glycerol catabolic process	1/998	4/16374	0.222422	0.518819	0.463684	GPD2	1
GO:0019695	choline metabolic process	1/998	4/16374	0.222422	0.518819	0.463684	DMGDH	1
GO:0021769	orbitofrontal cortex development	1/998	4/16374	0.222422	0.518819	0.463684	FGFR2	1
GO:0021773	striatal medium spiny neuron differentiation	1/998	4/16374	0.222422	0.518819	0.463684	ZSWIM6	1
GO:0021888	hypothalamus gonadotrophin-releasing hormone neuron development	1/998	4/16374	0.222422	0.518819	0.463684	NRP1	1
GO:0021924	cell proliferation in external granule layer	1/998	4/16374	0.222422	0.518819	0.463684	GPR37L1	1
GO:0021940	positive regulation of cerebellar granule cell precursor proliferation	1/998	4/16374	0.222422	0.518819	0.463684	GPR37L1	1
GO:0030104	water homeostasis	1/998	4/16374	0.222422	0.518819	0.463684	AQP4	1
GO:0030382	sperm mitochondrion organization	1/998	4/16374	0.222422	0.518819	0.463684	SEPT4	1
GO:0030644	cellular chloride ion homeostasis	1/998	4/16374	0.222422	0.518819	0.463684	CKB	1
GO:0030858	positive regulation of epithelial cell differentiation	1/998	4/16374	0.222422	0.518819	0.463684	SOX9	1
GO:0031099	regeneration	1/998	4/16374	0.222422	0.518819	0.463684	PRRX1	1
GO:0031401	positive regulation of protein modification process	1/998	4/16374	0.222422	0.518819	0.463684	ATG7	1
GO:0031427	response to methotrexate	1/998	4/16374	0.222422	0.518819	0.463684	DHFR	1
GO:0032205	negative regulation of telomere maintenance	1/998	4/16374	0.222422	0.518819	0.463684	TERF2IP	1
GO:0032348	negative regulation of aldosterone biosynthetic process	1/998	4/16374	0.222422	0.518819	0.463684	DKK3	1
GO:0032369	negative regulation of lipid transport	1/998	4/16374	0.222422	0.518819	0.463684	ITGAV	1
GO:0032386	regulation of intracellular transport	1/998	4/16374	0.222422	0.518819	0.463684	WWC1	1
GO:0032455	nerve growth factor processing	1/998	4/16374	0.222422	0.518819	0.463684	PCSK5	1
GO:0032497	detection of lipopolysaccharide	1/998	4/16374	0.222422	0.518819	0.463684	SCARB1	1
GO:0032648	regulation of interferon-beta production	1/998	4/16374	0.222422	0.518819	0.463684	TRAF3	1
GO:0032651	regulation of interleukin-1 beta production	1/998	4/16374	0.222422	0.518819	0.463684	SIRPA	1
GO:0033133	positive regulation of glucokinase activity	1/998	4/16374	0.222422	0.518819	0.463684	PFKFB2	1
GO:0033590	response to cobalamin	1/998	4/16374	0.222422	0.518819	0.463684	MT-CYB	1
GO:0035106	operant conditioning	1/998	4/16374	0.222422	0.518819	0.463684	AGT	1
GO:0035330	regulation of hippo signaling	1/998	4/16374	0.222422	0.518819	0.463684	WWC1	1
GO:0035442	dipeptide transmembrane transport	1/998	4/16374	0.222422	0.518819	0.463684	SLC15A2	1
GO:0035524	proline transmembrane transport	1/998	4/16374	0.222422	0.518819	0.463684	SLC1A4	1
GO:0035813	regulation of renal sodium excretion	1/998	4/16374	0.222422	0.518819	0.463684	AGT	1
GO:0035910	ascending aorta morphogenesis	1/998	4/16374	0.222422	0.518819	0.463684	TGFB2	1
GO:0036337	Fas signaling pathway	1/998	4/16374	0.222422	0.518819	0.463684	TMBIM1	1
GO:0036466	synaptic vesicle recycling via endosome	1/998	4/16374	0.222422	0.518819	0.463684	BTBD8	1
GO:0036486	ventral trunk neural crest cell migration	1/998	4/16374	0.222422	0.518819	0.463684	NRP1	1
GO:0036515	serotonergic neuron axon guidance	1/998	4/16374	0.222422	0.518819	0.463684	FZD3	1
GO:0038108	negative regulation of appetite by leptin-mediated signaling pathway	1/998	4/16374	0.222422	0.518819	0.463684	BBS2	1
GO:0038165	oncostatin-M-mediated signaling pathway	1/998	4/16374	0.222422	0.518819	0.463684	IL6ST	1
GO:0040038	polar body extrusion after meiotic divisions	1/998	4/16374	0.222422	0.518819	0.463684	FMN2	1
GO:0042264	peptidyl-aspartic acid hydroxylation	1/998	4/16374	0.222422	0.518819	0.463684	ASPH	1
GO:0042637	catagen	1/998	4/16374	0.222422	0.518819	0.463684	TGFB2	1
GO:0042745	circadian sleep/wake cycle	1/998	4/16374	0.222422	0.518819	0.463684	NR1D1	1
GO:0043217	myelin maintenance	1/998	4/16374	0.222422	0.518819	0.463684	ABCD2	1
GO:0043550	regulation of lipid kinase activity	1/998	4/16374	0.222422	0.518819	0.463684	RBL2	1
GO:0043553	negative regulation of phosphatidylinositol 3-kinase activity	1/998	4/16374	0.222422	0.518819	0.463684	PIK3IP1	1
GO:0043570	maintenance of DNA repeat elements	1/998	4/16374	0.222422	0.518819	0.463684	TCF7L2	1
GO:0045191	regulation of isotype switching	1/998	4/16374	0.222422	0.518819	0.463684	APLF	1
GO:0045448	mitotic cell cycle, embryonic	1/998	4/16374	0.222422	0.518819	0.463684	FZD3	1
GO:0046033	AMP metabolic process	1/998	4/16374	0.222422	0.518819	0.463684	AK4	1
GO:0046596	regulation of viral entry into host cell	1/998	4/16374	0.222422	0.518819	0.463684	HS3ST5	1
GO:0046605	regulation of centrosome cycle	1/998	4/16374	0.222422	0.518819	0.463684	MCPH1	1
GO:0046666	retinal cell programmed cell death	1/998	4/16374	0.222422	0.518819	0.463684	BCL2	1
GO:0046726	positive regulation by virus of viral protein levels in host cell	1/998	4/16374	0.222422	0.518819	0.463684	HACD3	1
GO:0046952	ketone body catabolic process	1/998	4/16374	0.222422	0.518819	0.463684	BDH1	1
GO:0046959	habituation	1/998	4/16374	0.222422	0.518819	0.463684	KALRN	1
GO:0048105	establishment of body hair planar orientation	1/998	4/16374	0.222422	0.518819	0.463684	ASTN2	1
GO:0048133	male germ-line stem cell asymmetric division	1/998	4/16374	0.222422	0.518819	0.463684	ZBTB16	1
GO:0048549	positive regulation of pinocytosis	1/998	4/16374	0.222422	0.518819	0.463684	AXL	1
GO:0048664	neuron fate determination	1/998	4/16374	0.222422	0.518819	0.463684	PRRX1	1
GO:0048677	axon extension involved in regeneration	1/998	4/16374	0.222422	0.518819	0.463684	NTRK3	1
GO:0048790	maintenance of presynaptic active zone structure	1/998	4/16374	0.222422	0.518819	0.463684	ERC2	1
GO:0048861	leukemia inhibitory factor signaling pathway	1/998	4/16374	0.222422	0.518819	0.463684	IL6ST	1
GO:0048865	stem cell fate commitment	1/998	4/16374	0.222422	0.518819	0.463684	SOX9	1
GO:0050974	detection of mechanical stimulus involved in sensory perception	1/998	4/16374	0.222422	0.518819	0.463684	SERPINE2	1
GO:0050994	regulation of lipid catabolic process	1/998	4/16374	0.222422	0.518819	0.463684	THRA	1
GO:0051047	positive regulation of secretion	1/998	4/16374	0.222422	0.518819	0.463684	ACSL3	1
GO:0051098	regulation of binding	1/998	4/16374	0.222422	0.518819	0.463684	SMAD3	1
GO:0051106	positive regulation of DNA ligation	1/998	4/16374	0.222422	0.518819	0.463684	APLF	1
GO:0051138	positive regulation of NK T cell differentiation	1/998	4/16374	0.222422	0.518819	0.463684	ZBTB16	1
GO:0051180	vitamin transport	1/998	4/16374	0.222422	0.518819	0.463684	TTPA	1
GO:0051187	cofactor catabolic process	1/998	4/16374	0.222422	0.518819	0.463684	MT3	1
GO:0051295	establishment of meiotic spindle localization	1/998	4/16374	0.222422	0.518819	0.463684	FMN2	1
GO:0051387	negative regulation of neurotrophin TRK receptor signaling pathway	1/998	4/16374	0.222422	0.518819	0.463684	AGT	1
GO:0051409	response to nitrosative stress	1/998	4/16374	0.222422	0.518819	0.463684	GCLC	1
GO:0051873	killing by host of symbiont cells	1/998	4/16374	0.222422	0.518819	0.463684	GAPDH	1
GO:0051919	positive regulation of fibrinolysis	1/998	4/16374	0.222422	0.518819	0.463684	KLKB1	1
GO:0051969	regulation of transmission of nerve impulse	1/998	4/16374	0.222422	0.518819	0.463684	AGT	1
GO:0060018	astrocyte fate commitment	1/998	4/16374	0.222422	0.518819	0.463684	SOX9	1
GO:0060158	phospholipase C-activating dopamine receptor signaling pathway	1/998	4/16374	0.222422	0.518819	0.463684	SLC9A3R1	1
GO:0060159	regulation of dopamine receptor signaling pathway	1/998	4/16374	0.222422	0.518819	0.463684	ALK	1
GO:0060160	negative regulation of dopamine receptor signaling pathway	1/998	4/16374	0.222422	0.518819	0.463684	PALM	1
GO:0060192	negative regulation of lipase activity	1/998	4/16374	0.222422	0.518819	0.463684	PLIN5	1
GO:0060244	negative regulation of cell proliferation involved in contact inhibition	1/998	4/16374	0.222422	0.518819	0.463684	FAP	1
GO:0060267	positive regulation of respiratory burst	1/998	4/16374	0.222422	0.518819	0.463684	CAMK1D	1
GO:0060319	primitive erythrocyte differentiation	1/998	4/16374	0.222422	0.518819	0.463684	VEGFA	1
GO:0060364	frontal suture morphogenesis	1/998	4/16374	0.222422	0.518819	0.463684	GLI3	1
GO:0060393	regulation of pathway-restricted SMAD protein phosphorylation	1/998	4/16374	0.222422	0.518819	0.463684	BMPER	1
GO:0060406	positive regulation of penile erection	1/998	4/16374	0.222422	0.518819	0.463684	EDNRB	1
GO:0060421	positive regulation of heart growth	1/998	4/16374	0.222422	0.518819	0.463684	ACACB	1
GO:0060574	intestinal epithelial cell maturation	1/998	4/16374	0.222422	0.518819	0.463684	HIF1A	1
GO:0060979	vasculogenesis involved in coronary vascular morphogenesis	1/998	4/16374	0.222422	0.518819	0.463684	TGFBR3	1
GO:0061030	epithelial cell differentiation involved in mammary gland alveolus development	1/998	4/16374	0.222422	0.518819	0.463684	HIF1A	1
GO:0061084	negative regulation of protein refolding	1/998	4/16374	0.222422	0.518819	0.463684	SNRNP70	1
GO:0061323	cell proliferation involved in heart morphogenesis	1/998	4/16374	0.222422	0.518819	0.463684	SOX9	1
GO:0061355	Wnt protein secretion	1/998	4/16374	0.222422	0.518819	0.463684	WLS	1
GO:0061502	early endosome to recycling endosome transport	1/998	4/16374	0.222422	0.518819	0.463684	SORL1	1
GO:0061817	endoplasmic reticulum-plasma membrane tethering	1/998	4/16374	0.222422	0.518819	0.463684	ESYT2	1
GO:0070294	renal sodium ion absorption	1/998	4/16374	0.222422	0.518819	0.463684	SGK1	1
GO:0070384	Harderian gland development	1/998	4/16374	0.222422	0.518819	0.463684	SOX9	1
GO:0070486	leukocyte aggregation	1/998	4/16374	0.222422	0.518819	0.463684	SEMA4D	1
GO:0071279	cellular response to cobalt ion	1/998	4/16374	0.222422	0.518819	0.463684	BNIP3	1
GO:0071422	succinate transmembrane transport	1/998	4/16374	0.222422	0.518819	0.463684	SLC13A5	1
GO:0071603	endothelial cell-cell adhesion	1/998	4/16374	0.222422	0.518819	0.463684	THBS4	1
GO:0071650	negative regulation of chemokine (C-C motif) ligand 5 production	1/998	4/16374	0.222422	0.518819	0.463684	SIRPA	1
GO:0072033	renal vesicle formation	1/998	4/16374	0.222422	0.518819	0.463684	SOX9	1
GO:0072049	comma-shaped body morphogenesis	1/998	4/16374	0.222422	0.518819	0.463684	HES5	1
GO:0072050	S-shaped body morphogenesis	1/998	4/16374	0.222422	0.518819	0.463684	HES5	1
GO:0072086	specification of loop of Henle identity	1/998	4/16374	0.222422	0.518819	0.463684	HES5	1
GO:0072148	epithelial cell fate commitment	1/998	4/16374	0.222422	0.518819	0.463684	HES5	1
GO:0072193	ureter smooth muscle cell differentiation	1/998	4/16374	0.222422	0.518819	0.463684	SOX9	1
GO:0072278	metanephric comma-shaped body morphogenesis	1/998	4/16374	0.222422	0.518819	0.463684	PDGFRB	1
GO:0072289	metanephric nephron tubule formation	1/998	4/16374	0.222422	0.518819	0.463684	SOX9	1
GO:0089709	L-histidine transmembrane transport	1/998	4/16374	0.222422	0.518819	0.463684	SLC25A29	1
GO:0090184	positive regulation of kidney development	1/998	4/16374	0.222422	0.518819	0.463684	SOX9	1
GO:0090330	regulation of platelet aggregation	1/998	4/16374	0.222422	0.518819	0.463684	PRKCA	1
GO:0090521	glomerular visceral epithelial cell migration	1/998	4/16374	0.222422	0.518819	0.463684	KANK1	1
GO:0090527	actin filament reorganization	1/998	4/16374	0.222422	0.518819	0.463684	GSN	1
GO:0097114	NMDA glutamate receptor clustering	1/998	4/16374	0.222422	0.518819	0.463684	APOE	1
GO:0097118	neuroligin clustering involved in postsynaptic membrane assembly	1/998	4/16374	0.222422	0.518819	0.463684	MAGI2	1
GO:0097167	circadian regulation of translation	1/998	4/16374	0.222422	0.518819	0.463684	PER1	1
GO:0097201	negative regulation of transcription from RNA polymerase II promoter in response to stress	1/998	4/16374	0.222422	0.518819	0.463684	BAG3	1
GO:0097296	activation of cysteine-type endopeptidase activity involved in apoptotic signaling pathway	1/998	4/16374	0.222422	0.518819	0.463684	SMAD3	1
GO:0097490	sympathetic neuron projection extension	1/998	4/16374	0.222422	0.518819	0.463684	NRP1	1
GO:0097491	sympathetic neuron projection guidance	1/998	4/16374	0.222422	0.518819	0.463684	NRP1	1
GO:0099171	presynaptic modulation of chemical synaptic transmission	1/998	4/16374	0.222422	0.518819	0.463684	GIT1	1
GO:0099576	regulation of protein catabolic process at postsynapse, modulating synaptic transmission	1/998	4/16374	0.222422	0.518819	0.463684	EGLN1	1
GO:0099703	induction of synaptic vesicle exocytosis by positive regulation of presynaptic cytosolic calcium ion concentration	1/998	4/16374	0.222422	0.518819	0.463684	CACNB2	1
GO:0106071	positive regulation of adenylate cyclase-activating G protein-coupled receptor signaling pathway	1/998	4/16374	0.222422	0.518819	0.463684	PRKCA	1
GO:0110104	mRNA alternative polyadenylation	1/998	4/16374	0.222422	0.518819	0.463684	CPSF7	1
GO:0140253	cell-cell fusion	1/998	4/16374	0.222422	0.518819	0.463684	RAPGEF3	1
GO:1900069	regulation of cellular hyperosmotic salinity response	1/998	4/16374	0.222422	0.518819	0.463684	EFHD1	1
GO:1900086	positive regulation of peptidyl-tyrosine autophosphorylation	1/998	4/16374	0.222422	0.518819	0.463684	VEGFA	1
GO:1900186	negative regulation of clathrin-dependent endocytosis	1/998	4/16374	0.222422	0.518819	0.463684	SYT11	1
GO:1900221	regulation of amyloid-beta clearance	1/998	4/16374	0.222422	0.518819	0.463684	APOE	1
GO:1900365	positive regulation of mRNA polyadenylation	1/998	4/16374	0.222422	0.518819	0.463684	CPEB3	1
GO:1901097	negative regulation of autophagosome maturation	1/998	4/16374	0.222422	0.518819	0.463684	CLEC16A	1
GO:1901300	positive regulation of hydrogen peroxide-mediated programmed cell death	1/998	4/16374	0.222422	0.518819	0.463684	FOXO3	1
GO:1901385	regulation of voltage-gated calcium channel activity	1/998	4/16374	0.222422	0.518819	0.463684	AHNAK	1
GO:1901991	negative regulation of mitotic cell cycle phase transition	1/998	4/16374	0.222422	0.518819	0.463684	RGCC	1
GO:1902108	regulation of mitochondrial membrane permeability involved in apoptotic process	1/998	4/16374	0.222422	0.518819	0.463684	CAMK2A	1
GO:1902285	semaphorin-plexin signaling pathway involved in neuron projection guidance	1/998	4/16374	0.222422	0.518819	0.463684	NRP1	1
GO:1902616	acyl carnitine transmembrane transport	1/998	4/16374	0.222422	0.518819	0.463684	SLC25A48	1
GO:1902723	negative regulation of skeletal muscle satellite cell proliferation	1/998	4/16374	0.222422	0.518819	0.463684	EPHB1	1
GO:1902725	negative regulation of satellite cell differentiation	1/998	4/16374	0.222422	0.518819	0.463684	EPHB1	1
GO:1902952	positive regulation of dendritic spine maintenance	1/998	4/16374	0.222422	0.518819	0.463684	APOE	1
GO:1902953	positive regulation of ER to Golgi vesicle-mediated transport	1/998	4/16374	0.222422	0.518819	0.463684	SORL1	1
GO:1903025	regulation of RNA polymerase II regulatory region sequence-specific DNA binding	1/998	4/16374	0.222422	0.518819	0.463684	ZBTB7C	1
GO:1903377	negative regulation of oxidative stress-induced neuron intrinsic apoptotic signaling pathway	1/998	4/16374	0.222422	0.518819	0.463684	HIF1A	1
GO:1903416	response to glycoside	1/998	4/16374	0.222422	0.518819	0.463684	ATP1A2	1
GO:1903553	positive regulation of extracellular exosome assembly	1/998	4/16374	0.222422	0.518819	0.463684	SDC4	1
GO:1903670	regulation of sprouting angiogenesis	1/998	4/16374	0.222422	0.518819	0.463684	GLUL	1
GO:1903912	negative regulation of endoplasmic reticulum stress-induced eIF2 alpha phosphorylation	1/998	4/16374	0.222422	0.518819	0.463684	NCK2	1
GO:1904030	negative regulation of cyclin-dependent protein kinase activity	1/998	4/16374	0.222422	0.518819	0.463684	CAMK2N1	1
GO:1904031	positive regulation of cyclin-dependent protein kinase activity	1/998	4/16374	0.222422	0.518819	0.463684	STOX1	1
GO:1904209	positive regulation of chemokine (C-C motif) ligand 2 secretion	1/998	4/16374	0.222422	0.518819	0.463684	MBP	1
GO:1904528	positive regulation of microtubule binding	1/998	4/16374	0.222422	0.518819	0.463684	PPP2CB	1
GO:1905563	negative regulation of vascular endothelial cell proliferation	1/998	4/16374	0.222422	0.518819	0.463684	MEF2C	1
GO:1905867	epididymis development	1/998	4/16374	0.222422	0.518819	0.463684	GJA1	1
GO:1905908	positive regulation of amyloid fibril formation	1/998	4/16374	0.222422	0.518819	0.463684	APOE	1
GO:1990441	negative regulation of transcription from RNA polymerase II promoter in response to endoplasmic reticulum stress	1/998	4/16374	0.222422	0.518819	0.463684	NCK2	1
GO:1990504	dense core granule exocytosis	1/998	4/16374	0.222422	0.518819	0.463684	CADPS2	1
GO:1990785	response to water-immersion restraint stress	1/998	4/16374	0.222422	0.518819	0.463684	FOXO3	1
GO:2000051	negative regulation of non-canonical Wnt signaling pathway	1/998	4/16374	0.222422	0.518819	0.463684	ZNRF3	1
GO:2000065	negative regulation of cortisol biosynthetic process	1/998	4/16374	0.222422	0.518819	0.463684	DKK3	1
GO:2000095	regulation of Wnt signaling pathway, planar cell polarity pathway	1/998	4/16374	0.222422	0.518819	0.463684	ZNRF3	1
GO:2000491	positive regulation of hepatic stellate cell activation	1/998	4/16374	0.222422	0.518819	0.463684	PDGFRB	1
GO:2000546	positive regulation of endothelial cell chemotaxis to fibroblast growth factor	1/998	4/16374	0.222422	0.518819	0.463684	FGF2	1
GO:2000741	positive regulation of mesenchymal stem cell differentiation	1/998	4/16374	0.222422	0.518819	0.463684	SOX9	1
GO:2000757	negative regulation of peptidyl-lysine acetylation	1/998	4/16374	0.222422	0.518819	0.463684	KLF15	1
GO:2001135	regulation of endocytic recycling	1/998	4/16374	0.222422	0.518819	0.463684	NDRG4	1
GO:2001141	regulation of RNA biosynthetic process	1/998	4/16374	0.222422	0.518819	0.463684	MITF	1
GO:2001168	positive regulation of histone H2B ubiquitination	1/998	4/16374	0.222422	0.518819	0.463684	CDK9	1
GO:2001184	positive regulation of interleukin-12 secretion	1/998	4/16374	0.222422	0.518819	0.463684	MAPK11	1
GO:0032092	positive regulation of protein binding	6/998	67/16374	0.223033	0.519954	0.464698	ARRB1/TCF7L2/HIP1R/SPON1/TIAM1/LFNG	6
GO:0030217	T cell differentiation	10/998	124/16374	0.224216	0.522422	0.466904	VSIR/GLI3/PREX1/LFNG/NFATC2/ITPKB/DTX1/SOX13/LEPR/ZBTB1	10
GO:0033344	cholesterol efflux	4/998	40/16374	0.225226	0.522447	0.466927	PTCH1/SCARB1/APOE/NPC1	4
GO:0035735	intraciliary transport involved in cilium assembly	4/998	40/16374	0.225226	0.522447	0.466927	SSX2IP/WDR60/DYNLL1/TRIP11	4
GO:0045123	cellular extravasation	4/998	40/16374	0.225226	0.522447	0.466927	PLCB1/RIPOR2/BCR/ABR	4
GO:0001755	neural crest cell migration	3/998	27/16374	0.225352	0.522447	0.466927	ERBB4/HIF1A/EDNRB	3
GO:0003073	regulation of systemic arterial blood pressure	3/998	27/16374	0.225352	0.522447	0.466927	ADRA1A/GPR37L1/DDAH1	3
GO:0015949	nucleobase-containing small molecule interconversion	3/998	27/16374	0.225352	0.522447	0.466927	AK4/NME3/DUT	3
GO:0035767	endothelial cell chemotaxis	3/998	27/16374	0.225352	0.522447	0.466927	FGF2/VEGFA/NRP1	3
GO:0042157	lipoprotein metabolic process	3/998	27/16374	0.225352	0.522447	0.466927	ATG7/ITGAV/PPARA	3
GO:0060411	cardiac septum morphogenesis	3/998	27/16374	0.225352	0.522447	0.466927	FGFR2/TGFBR3/TGFB2	3
GO:0009057	macromolecule catabolic process	9/998	110/16374	0.227532	0.527209	0.471183	GRIN2C/GJA1/FMN2/SOX9/SERPINE2/FOXO1/SORL1/ATG7/SMAD3	9
GO:0010629	negative regulation of gene expression	16/998	213/16374	0.227919	0.5278	0.471711	GJA1/STOX1/RBMS3/BBS2/SFMBT2/ACACB/TNRC6B/VEGFA/ITGB8/HIF1A/TGFB2/MEF2C/PC/INPPL1/RBL2/APOE	16
GO:0007565	female pregnancy	12/998	154/16374	0.229737	0.5278	0.471711	BCL2/CST3/CD38/BSG/COL16A1/FBLN1/AGT/SLC2A1/PCSK5/ARID1A/CAPN2/RXRA	12
GO:0050821	protein stabilization	13/998	169/16374	0.231369	0.5278	0.471711	EPHA4/ATP1B2/ANK2/HIP1R/GNAQ/WFS1/PER3/MT3/BAG3/GAPDH/PIK3R1/SMAD3/PPARGC1A	13
GO:0045665	negative regulation of neuron differentiation	5/998	54/16374	0.231406	0.5278	0.471711	GPR37L1/GLI3/FOXO3/DTX1/HES5	5
GO:0000002	mitochondrial genome maintenance	2/998	15/16374	0.231576	0.5278	0.471711	AKT3/SLC25A33	2
GO:0002031	G protein-coupled receptor internalization	2/998	15/16374	0.231576	0.5278	0.471711	ARRB1/GRK4	2
GO:0006388	tRNA splicing, via endonucleolytic cleavage and ligation	2/998	15/16374	0.231576	0.5278	0.471711	TSEN15/ZBTB8OS	2
GO:0007213	G protein-coupled acetylcholine receptor signaling pathway	2/998	15/16374	0.231576	0.5278	0.471711	PLCB1/GNAQ	2
GO:0007274	neuromuscular synaptic transmission	2/998	15/16374	0.231576	0.5278	0.471711	DTNA/KIF1B	2
GO:0007512	adult heart development	2/998	15/16374	0.231576	0.5278	0.471711	GJA1/ADRA1A	2
GO:0010955	negative regulation of protein processing	2/998	15/16374	0.231576	0.5278	0.471711	SERPINE2/PRNP	2
GO:0019674	NAD metabolic process	2/998	15/16374	0.231576	0.5278	0.471711	CD38/NT5E	2
GO:0030502	negative regulation of bone mineralization	2/998	15/16374	0.231576	0.5278	0.471711	SOX9/HIF1A	2
GO:0032703	negative regulation of interleukin-2 production	2/998	15/16374	0.231576	0.5278	0.471711	PRNP/HDAC7	2
GO:0034122	negative regulation of toll-like receptor signaling pathway	2/998	15/16374	0.231576	0.5278	0.471711	LGR4/TYRO3	2
GO:0034656	nucleobase-containing small molecule catabolic process	2/998	15/16374	0.231576	0.5278	0.471711	ENTPD2/ENTPD1	2
GO:0035815	positive regulation of renal sodium excretion	2/998	15/16374	0.231576	0.5278	0.471711	AGT/EDNRB	2
GO:0044320	cellular response to leptin stimulus	2/998	15/16374	0.231576	0.5278	0.471711	MT3/LEPR	2
GO:0046328	regulation of JNK cascade	2/998	15/16374	0.231576	0.5278	0.471711	EPHB1/PHLPP1	2
GO:0048026	positive regulation of mRNA splicing, via spliceosome	2/998	15/16374	0.231576	0.5278	0.471711	PRDX6/SNRNP70	2
GO:0048268	clathrin coat assembly	2/998	15/16374	0.231576	0.5278	0.471711	HIP1R/EPS15	2
GO:0060134	prepulse inhibition	2/998	15/16374	0.231576	0.5278	0.471711	CTNNA2/GRIN1	2
GO:0060314	regulation of ryanodine-sensitive calcium-release channel activity	2/998	15/16374	0.231576	0.5278	0.471711	PDE4D/CALM1	2
GO:0060795	cell fate commitment involved in formation of primary germ layer	2/998	15/16374	0.231576	0.5278	0.471711	EYA1/EYA2	2
GO:0061001	regulation of dendritic spine morphogenesis	2/998	15/16374	0.231576	0.5278	0.471711	EPHA4/PDLIM5	2
GO:0070050	neuron cellular homeostasis	2/998	15/16374	0.231576	0.5278	0.471711	TYRO3/DNAJB2	2
GO:0090162	establishment of epithelial cell polarity	2/998	15/16374	0.231576	0.5278	0.471711	PARD3/HES5	2
GO:1900153	positive regulation of nuclear-transcribed mRNA catabolic process, deadenylation-dependent decay	2/998	15/16374	0.231576	0.5278	0.471711	CPEB3/TNRC6B	2
GO:1905564	positive regulation of vascular endothelial cell proliferation	2/998	15/16374	0.231576	0.5278	0.471711	FGF2/AKT3	2
GO:1990000	amyloid fibril formation	2/998	15/16374	0.231576	0.5278	0.471711	GSN/APOE	2
GO:0009101	glycoprotein biosynthetic process	7/998	82/16374	0.232389	0.528789	0.472594	BCL2/ST6GALNAC3/FUT10/FUT9/MAN2A1/NPC1/TRIP11	7
GO:0040011	locomotion	7/998	82/16374	0.232389	0.528789	0.472594	ATP1A2/ERBB4/FRMD5/FBLN1/NRG2/FBXO7/SSX2IP	7
GO:1903508	positive regulation of nucleic acid-templated transcription	7/998	82/16374	0.232389	0.528789	0.472594	MED12L/SMARCD2/WBP2NL/RBPMS/TDRD3/DTX1/TRIP11	7
GO:0071333	cellular response to glucose stimulus	6/998	68/16374	0.233077	0.530066	0.473735	GJB6/ADCY8/FOXO3/GCLC/RAB11FIP2/PPARGC1A	6
GO:0007049	cell cycle	32/998	458/16374	0.234572	0.533175	0.476515	RPS6KA2/CABLES1/PARD3/BRINP1/STOX1/MAPK4/FAM107A/TXNIP/MRPL41/RASSF4/FGFR2/BCR/PRKCA/CDK18/RHOB/PRR5/ZNF703/LFNG/PTCH1/SLC9A3R1/TGFB2/PPP1R13B/EPB41L2/TXNL4B/TP53BP2/CDKL1/CDKL5/E2F3/AHCTF1/KIF13A/SMAD3/CAMK2N1	32
GO:1901566	organonitrogen compound biosynthetic process	12/998	155/16374	0.236315	0.536846	0.479795	BCL2/ST6GALNAC3/ACSL3/FUT10/ATG7/CAPN2/FUT9/ITGAV/MAN2A1/ITM2B/NPC1/TRIP11	12
GO:0001892	embryonic placenta development	4/998	41/16374	0.238544	0.539986	0.482601	TTPA/HIF1A/EPAS1/EGLN1	4
GO:0016575	histone deacetylation	4/998	41/16374	0.238544	0.539986	0.482601	SREBF1/NACC2/BAZ2A/AKAP8L	4
GO:0030514	negative regulation of BMP signaling pathway	4/998	41/16374	0.238544	0.539986	0.482601	HTRA1/CHRDL1/FSTL3/BMPER	4
GO:0032456	endocytic recycling	4/998	41/16374	0.238544	0.539986	0.482601	MICALL2/SORL1/EPS15/NDRG4	4
GO:0086002	cardiac muscle cell action potential involved in contraction	4/998	41/16374	0.238544	0.539986	0.482601	CACNB2/ANK2/KCND3/KCNE4	4
GO:0060541	respiratory system development	8/998	97/16374	0.238794	0.539986	0.482601	SREBF1/FGFR2/GLI3/RIDA/VEGFA/FGFRL1/EPAS1/FSTL3	8
GO:0009792	embryo development ending in birth or egg hatching	11/998	141/16374	0.241305	0.539986	0.482601	EYA1/PLXNA2/ABI1/CRB2/LFNG/PTCH1/TGFB2/PCSK5/HES5/ITPK1/SMAD3	11
GO:0016485	protein processing	7/998	83/16374	0.241594	0.539986	0.482601	KLKB1/SERPINE2/GLI3/SPON1/PRNP/PTCH1/PCSK5	7
GO:0001937	negative regulation of endothelial cell proliferation	3/998	28/16374	0.24186	0.539986	0.482601	GJA1/RGCC/APOE	3
GO:0010575	positive regulation of vascular endothelial growth factor production	3/998	28/16374	0.24186	0.539986	0.482601	RORA/HIF1A/IL6ST	3
GO:0032007	negative regulation of TOR signaling	3/998	28/16374	0.24186	0.539986	0.482601	DDIT4/HIF1A/MTM1	3
GO:0034314	Arp2/3 complex-mediated actin nucleation	3/998	28/16374	0.24186	0.539986	0.482601	CTNNA2/HIP1R/FCHSD2	3
GO:0043484	regulation of RNA splicing	3/998	28/16374	0.24186	0.539986	0.482601	AHNAK/MBNL2/SNRNP70	3
GO:0045737	positive regulation of cyclin-dependent protein serine/threonine kinase activity	3/998	28/16374	0.24186	0.539986	0.482601	CCND3/RGCC/MAPRE3	3
GO:0048730	epidermis morphogenesis	3/998	28/16374	0.24186	0.539986	0.482601	BCL2/FGFR2/TGFB2	3
GO:0048864	stem cell development	3/998	28/16374	0.24186	0.539986	0.482601	ERBB4/HIF1A/EDNRB	3
GO:0050654	chondroitin sulfate proteoglycan metabolic process	3/998	28/16374	0.24186	0.539986	0.482601	CSGALNACT1/NCAN/DSE	3
GO:0070507	regulation of microtubule cytoskeleton organization	3/998	28/16374	0.24186	0.539986	0.482601	EFNA5/FAM107A/PHLDB1	3
GO:0007017	microtubule-based process	5/998	55/16374	0.242882	0.539986	0.482601	EFNA5/FAM107A/MACF1/BCAS3/PHLDB1	5
GO:0008637	apoptotic mitochondrial changes	5/998	55/16374	0.242882	0.539986	0.482601	FAM162A/BNIP3/NOL3/GCLC/PPP2CB	5
GO:0044271	cellular nitrogen compound biosynthetic process	5/998	55/16374	0.242882	0.539986	0.482601	SIRPA/AGT/CD47/DDAH1/SMAD3	5
GO:0034765	regulation of ion transmembrane transport	9/998	112/16374	0.243233	0.539986	0.482601	CACNA2D3/TPCN1/KCNQ3/NALCN/CACNA1B/KCNMA1/KCNA2/KCNJ10/KCND3	9
GO:0042127	regulation of cell population proliferation	9/998	112/16374	0.243233	0.539986	0.482601	EGLN3/TXNIP/SOX9/SGK1/AGT/EPS15/SGK3/MITF/PIAS1	9
GO:0001701	in utero embryonic development	15/998	202/16374	0.250715	0.539986	0.482601	MT-ND4/GJA1/FGFR2/GLI3/TTPA/VEGFA/PTCH1/HIF1A/CAPN2/AMOT/EPAS1/RBBP6/RXRA/SMAD3/MAN2A1	15
GO:0006006	glucose metabolic process	9/998	113/16374	0.251221	0.539986	0.482601	RORA/FOXO1/ACACB/PDK4/PGM1/PPARA/LEPR/INPPL1/PPARGC1A	9
GO:0002534	cytokine production involved in inflammatory response	4/998	42/16374	0.25204	0.539986	0.482601	SIRPA/ABCD2/PER1/IL17D	4
GO:0006997	nucleus organization	4/998	42/16374	0.25204	0.539986	0.482601	SYNE1/SUN2/NUMA1/KDM3A	4
GO:0043297	apical junction assembly	4/998	42/16374	0.25204	0.539986	0.482601	PARD3/MICALL2/FRMPD2/PATJ	4
GO:0061061	muscle structure development	4/998	42/16374	0.25204	0.539986	0.482601	RORA/SYNE1/DDX17/DDX5	4
GO:0042475	odontogenesis of dentin-containing tooth	6/998	70/16374	0.253567	0.539986	0.482601	LRP4/BSG/FOXO1/GLI3/PPARA/NFIC	6
GO:0032147	activation of protein kinase activity	5/998	56/16374	0.254505	0.539986	0.482601	RGCC/GPRC5B/AGT/VEGFA/TGFB2	5
GO:0035113	embryonic appendage morphogenesis	5/998	56/16374	0.254505	0.539986	0.482601	GJA1/LRP4/GLI3/ZBTB16/FREM2	5
GO:0002076	osteoblast development	2/998	16/16374	0.254689	0.539986	0.482601	PTH1R/SMAD3	2
GO:0006750	glutathione biosynthetic process	2/998	16/16374	0.254689	0.539986	0.482601	HAGH/GCLC	2
GO:0006984	ER-nucleus signaling pathway	2/998	16/16374	0.254689	0.539986	0.482601	WFS1/NCK2	2
GO:0010569	regulation of double-strand break repair via homologous recombination	2/998	16/16374	0.254689	0.539986	0.482601	TEX15/TERF2IP	2
GO:0010875	positive regulation of cholesterol efflux	2/998	16/16374	0.254689	0.539986	0.482601	PTCH1/APOE	2
GO:0010878	cholesterol storage	2/998	16/16374	0.254689	0.539986	0.482601	PPARA/SCARB1	2
GO:0010934	macrophage cytokine production	2/998	16/16374	0.254689	0.539986	0.482601	GPRC5B/TGFB2	2
GO:0019229	regulation of vasoconstriction	2/998	16/16374	0.254689	0.539986	0.482601	ATP1A2/AGT	2
GO:0019430	removal of superoxide radicals	2/998	16/16374	0.254689	0.539986	0.482601	DHFR/MT3	2
GO:0030033	microvillus assembly	2/998	16/16374	0.254689	0.539986	0.482601	TNIK/SLC9A3R1	2
GO:0030214	hyaluronan catabolic process	2/998	16/16374	0.254689	0.539986	0.482601	LYVE1/FGF2	2
GO:0030252	growth hormone secretion	2/998	16/16374	0.254689	0.539986	0.482601	ITSN1/KALRN	2
GO:0031396	regulation of protein ubiquitination	2/998	16/16374	0.254689	0.539986	0.482601	FBXO2/DNAJB2	2
GO:0035066	positive regulation of histone acetylation	2/998	16/16374	0.254689	0.539986	0.482601	ARRB1/PPARGC1A	2
GO:0035970	peptidyl-threonine dephosphorylation	2/998	16/16374	0.254689	0.539986	0.482601	PPM1B/PPP2CB	2
GO:0043631	RNA polyadenylation	2/998	16/16374	0.254689	0.539986	0.482601	CPEB3/CDK9	2
GO:0043691	reverse cholesterol transport	2/998	16/16374	0.254689	0.539986	0.482601	SCARB1/APOE	2
GO:0048872	homeostasis of number of cells	2/998	16/16374	0.254689	0.539986	0.482601	SOX9/BCR	2
GO:0050770	regulation of axonogenesis	2/998	16/16374	0.254689	0.539986	0.482601	EPHA4/GRIN1	2
GO:0055119	relaxation of cardiac muscle	2/998	16/16374	0.254689	0.539986	0.482601	ATP1A2/PDE4D	2
GO:0061377	mammary gland lobule development	2/998	16/16374	0.254689	0.539986	0.482601	ERBB4/VEGFA	2
GO:0062197	cellular response to chemical stress	2/998	16/16374	0.254689	0.539986	0.482601	HIF1A/EPAS1	2
GO:0070242	thymocyte apoptotic process	2/998	16/16374	0.254689	0.539986	0.482601	GLI3/HIF1A	2
GO:0070841	inclusion body assembly	2/998	16/16374	0.254689	0.539986	0.482601	SORL1/DNAJB2	2
GO:0086065	cell communication involved in cardiac conduction	2/998	16/16374	0.254689	0.539986	0.482601	PDE4D/CALM1	2
GO:0098698	postsynaptic specialization assembly	2/998	16/16374	0.254689	0.539986	0.482601	NTRK3/NTNG2	2
GO:1903146	regulation of autophagy of mitochondrion	2/998	16/16374	0.254689	0.539986	0.482601	SREBF1/BNIP3L	2
GO:0006119	oxidative phosphorylation	3/998	29/16374	0.258556	0.539986	0.482601	SLC25A33/NIPSNAP2/ATP5F1C	3
GO:0007422	peripheral nervous system development	3/998	29/16374	0.258556	0.539986	0.482601	PMP22/EDNRB/GPC1	3
GO:0014033	neural crest cell differentiation	3/998	29/16374	0.258556	0.539986	0.482601	SOX9/FBXL17/MEF2C	3
GO:0018146	keratan sulfate biosynthetic process	3/998	29/16374	0.258556	0.539986	0.482601	PRELP/CHST1/CHST6	3
GO:0048873	homeostasis of number of cells within a tissue	3/998	29/16374	0.258556	0.539986	0.482601	BCL2/SOX9/AKT3	3
GO:0050650	chondroitin sulfate proteoglycan biosynthetic process	3/998	29/16374	0.258556	0.539986	0.482601	CSGALNACT1/NCAN/DSE	3
GO:0070528	protein kinase C signaling	3/998	29/16374	0.258556	0.539986	0.482601	ADRA1A/VEGFA/ADGRG1	3
GO:0071542	dopaminergic neuron differentiation	3/998	29/16374	0.258556	0.539986	0.482601	TIAM1/VEGFA/HIF1A	3
GO:0090077	foam cell differentiation	3/998	29/16374	0.258556	0.539986	0.482601	AGT/ITGAV/PPARA	3
GO:2000145	regulation of cell motility	3/998	29/16374	0.258556	0.539986	0.482601	ERBB4/NRG2/SSX2IP	3
GO:0003013	circulatory system process	7/998	85/16374	0.260339	0.539986	0.482601	ATP1A2/CACNA1B/BCR/SGK1/AGT/ABR/EDNRB	7
GO:0060348	bone development	7/998	85/16374	0.260339	0.539986	0.482601	RANBP3L/GJA1/FGFR3/FGFR2/GLI3/PDGFC/MCPH1	7
GO:0071466	cellular response to xenobiotic stimulus	7/998	85/16374	0.260339	0.539986	0.482601	RORA/CYP2J2/CYB5B/EPHX1/CYP46A1/MGST1/SULT1A1	7
GO:0008544	epidermis development	10/998	129/16374	0.261425	0.539986	0.482601	LGR4/APCDD1/LRP4/SOX9/FGFR2/TGFB2/CD109/EMP1/PPARA/FZD3	10
GO:0050900	leukocyte migration	14/998	189/16374	0.263233	0.539986	0.482601	SDC4/MERTK/ATP1B2/SIRPA/BSG/BCR/ABR/CD47/VEGFA/SLC7A10/SDC2/ITGAV/PIK3R1/GPC1	14
GO:0006919	activation of cysteine-type endopeptidase activity involved in apoptotic process	6/998	71/16374	0.263994	0.539986	0.482601	EGLN3/DLC1/HIP1R/CTSH/FAM162A/SMAD3	6
GO:0018210	peptidyl-threonine modification	4/998	43/16374	0.265689	0.539986	0.482601	PARD3/STOX1/DDIT4/CALM1	4
GO:0071364	cellular response to epidermal growth factor stimulus	4/998	43/16374	0.265689	0.539986	0.482601	ERBB4/GAREM1/SOX9/ERRFI1	4
GO:0031016	pancreas development	5/998	57/16374	0.26626	0.539986	0.482601	SOX9/TCF7L2/FOXO1/WFS1/WLS	5
GO:0045453	bone resorption	5/998	57/16374	0.26626	0.539986	0.482601	CD38/PTH1R/PRKCA/PDK4/NCDN	5
GO:0045732	positive regulation of protein catabolic process	5/998	57/16374	0.26626	0.539986	0.482601	GJA1/SOX9/FOXO1/SORL1/ATG7	5
GO:0090263	positive regulation of canonical Wnt signaling pathway	10/998	130/16374	0.269101	0.539986	0.482601	LGR4/KANK1/RNF220/FGFR2/GPRC5B/DAAM2/PSMA1/WLS/WNK2/SMAD3	10
GO:0001661	conditioned taste aversion	1/998	5/16374	0.269827	0.539986	0.482601	GRIN1	1
GO:0001757	somite specification	1/998	5/16374	0.269827	0.539986	0.482601	COBL	1
GO:0002034	regulation of blood vessel diameter by renin-angiotensin	1/998	5/16374	0.269827	0.539986	0.482601	AGT	1
GO:0002070	epithelial cell maturation	1/998	5/16374	0.269827	0.539986	0.482601	GJA1	1
GO:0002175	protein localization to paranode region of axon	1/998	5/16374	0.269827	0.539986	0.482601	MAL	1
GO:0002326	B cell lineage commitment	1/998	5/16374	0.269827	0.539986	0.482601	BCL2	1
GO:0002329	pre-B cell differentiation	1/998	5/16374	0.269827	0.539986	0.482601	LRRC8A	1
GO:0002634	regulation of germinal center formation	1/998	5/16374	0.269827	0.539986	0.482601	MEF2C	1
GO:0002862	negative regulation of inflammatory response to antigenic stimulus	1/998	5/16374	0.269827	0.539986	0.482601	PSMA1	1
GO:0002870	T cell anergy	1/998	5/16374	0.269827	0.539986	0.482601	PHLPP1	1
GO:0003150	muscular septum morphogenesis	1/998	5/16374	0.269827	0.539986	0.482601	TGFBR3	1
GO:0003211	cardiac ventricle formation	1/998	5/16374	0.269827	0.539986	0.482601	MEF2C	1
GO:0003289	atrial septum primum morphogenesis	1/998	5/16374	0.269827	0.539986	0.482601	TGFB2	1
GO:0006002	fructose 6-phosphate metabolic process	1/998	5/16374	0.269827	0.539986	0.482601	PFKL	1
GO:0006102	isocitrate metabolic process	1/998	5/16374	0.269827	0.539986	0.482601	IDH2	1
GO:0006108	malate metabolic process	1/998	5/16374	0.269827	0.539986	0.482601	ME1	1
GO:0006144	purine nucleobase metabolic process	1/998	5/16374	0.269827	0.539986	0.482601	GMPR	1
GO:0006172	ADP biosynthetic process	1/998	5/16374	0.269827	0.539986	0.482601	AK4	1
GO:0006534	cysteine metabolic process	1/998	5/16374	0.269827	0.539986	0.482601	GCLC	1
GO:0006658	phosphatidylserine metabolic process	1/998	5/16374	0.269827	0.539986	0.482601	SERINC5	1
GO:0006807	nitrogen compound metabolic process	1/998	5/16374	0.269827	0.539986	0.482601	BCR	1
GO:0008038	neuron recognition	1/998	5/16374	0.269827	0.539986	0.482601	NTM	1
GO:0008611	ether lipid biosynthetic process	1/998	5/16374	0.269827	0.539986	0.482601	FASN	1
GO:0009812	flavonoid metabolic process	1/998	5/16374	0.269827	0.539986	0.482601	SULT1A1	1
GO:0009912	auditory receptor cell fate commitment	1/998	5/16374	0.269827	0.539986	0.482601	HES5	1
GO:0010756	positive regulation of plasminogen activation	1/998	5/16374	0.269827	0.539986	0.482601	ENO1	1
GO:0010815	bradykinin catabolic process	1/998	5/16374	0.269827	0.539986	0.482601	CTSH	1
GO:0010822	positive regulation of mitochondrion organization	1/998	5/16374	0.269827	0.539986	0.482601	PPARGC1A	1
GO:0010891	negative regulation of sequestering of triglyceride	1/998	5/16374	0.269827	0.539986	0.482601	PPARA	1
GO:0010936	negative regulation of macrophage cytokine production	1/998	5/16374	0.269827	0.539986	0.482601	TGFB2	1
GO:0010970	transport along microtubule	1/998	5/16374	0.269827	0.539986	0.482601	RHOT1	1
GO:0010991	negative regulation of SMAD protein complex assembly	1/998	5/16374	0.269827	0.539986	0.482601	LDLRAD4	1
GO:0014042	positive regulation of neuron maturation	1/998	5/16374	0.269827	0.539986	0.482601	BCL2	1
GO:0014074	response to purine-containing compound	1/998	5/16374	0.269827	0.539986	0.482601	SLC6A1	1
GO:0014905	myoblast fusion involved in skeletal muscle regeneration	1/998	5/16374	0.269827	0.539986	0.482601	CD81	1
GO:0015014	heparan sulfate proteoglycan biosynthetic process, polysaccharide chain biosynthetic process	1/998	5/16374	0.269827	0.539986	0.482601	CSGALNACT1	1
GO:0015696	ammonium transport	1/998	5/16374	0.269827	0.539986	0.482601	AQP1	1
GO:0016191	synaptic vesicle uncoating	1/998	5/16374	0.269827	0.539986	0.482601	DNAJC6	1
GO:0016202	regulation of striated muscle tissue development	1/998	5/16374	0.269827	0.539986	0.482601	SMAD3	1
GO:0018126	protein hydroxylation	1/998	5/16374	0.269827	0.539986	0.482601	EGLN3	1
GO:0019509	L-methionine salvage from methylthioadenosine	1/998	5/16374	0.269827	0.539986	0.482601	ADI1	1
GO:0019640	glucuronate catabolic process to xylulose 5-phosphate	1/998	5/16374	0.269827	0.539986	0.482601	CRYL1	1
GO:0021636	trigeminal nerve morphogenesis	1/998	5/16374	0.269827	0.539986	0.482601	NRP1	1
GO:0021637	trigeminal nerve structural organization	1/998	5/16374	0.269827	0.539986	0.482601	NRP1	1
GO:0021781	glial cell fate commitment	1/998	5/16374	0.269827	0.539986	0.482601	HES5	1
GO:0021942	radial glia guided migration of Purkinje cell	1/998	5/16374	0.269827	0.539986	0.482601	CTNNA2	1
GO:0030091	protein repair	1/998	5/16374	0.269827	0.539986	0.482601	MSRB3	1
GO:0030856	regulation of epithelial cell differentiation	1/998	5/16374	0.269827	0.539986	0.482601	KIAA1109	1
GO:0031579	membrane raft organization	1/998	5/16374	0.269827	0.539986	0.482601	NPC1	1
GO:0032354	response to follicle-stimulating hormone	1/998	5/16374	0.269827	0.539986	0.482601	TGFBR3	1
GO:0032388	positive regulation of intracellular transport	1/998	5/16374	0.269827	0.539986	0.482601	NUMA1	1
GO:0032392	DNA geometric change	1/998	5/16374	0.269827	0.539986	0.482601	MTERF1	1
GO:0033033	negative regulation of myeloid cell apoptotic process	1/998	5/16374	0.269827	0.539986	0.482601	BCL2	1
GO:0033227	dsRNA transport	1/998	5/16374	0.269827	0.539986	0.482601	RFTN2	1
GO:0033564	anterior/posterior axon guidance	1/998	5/16374	0.269827	0.539986	0.482601	UNC5C	1
GO:0034721	histone H3-K4 demethylation, trimethyl-H3-K4-specific	1/998	5/16374	0.269827	0.539986	0.482601	JARID2	1
GO:0035905	ascending aorta development	1/998	5/16374	0.269827	0.539986	0.482601	TGFB2	1
GO:0036091	positive regulation of transcription from RNA polymerase II promoter in response to oxidative stress	1/998	5/16374	0.269827	0.539986	0.482601	MT3	1
GO:0036211	protein modification process	1/998	5/16374	0.269827	0.539986	0.482601	ATG7	1
GO:0036491	regulation of translation initiation in response to endoplasmic reticulum stress	1/998	5/16374	0.269827	0.539986	0.482601	NCK2	1
GO:0036514	dopaminergic neuron axon guidance	1/998	5/16374	0.269827	0.539986	0.482601	FZD3	1
GO:0038027	apolipoprotein A-I-mediated signaling pathway	1/998	5/16374	0.269827	0.539986	0.482601	ITGAV	1
GO:0038033	positive regulation of endothelial cell chemotaxis by VEGF-activated vascular endothelial growth factor receptor signaling pathway	1/998	5/16374	0.269827	0.539986	0.482601	VEGFA	1
GO:0038044	transforming growth factor-beta secretion	1/998	5/16374	0.269827	0.539986	0.482601	ITGAV	1
GO:0042180	cellular ketone metabolic process	1/998	5/16374	0.269827	0.539986	0.482601	PDK4	1
GO:0042985	negative regulation of amyloid precursor protein biosynthetic process	1/998	5/16374	0.269827	0.539986	0.482601	ITM2B	1
GO:0042989	sequestering of actin monomers	1/998	5/16374	0.269827	0.539986	0.482601	GSN	1
GO:0043243	positive regulation of protein-containing complex disassembly	1/998	5/16374	0.269827	0.539986	0.482601	BNIP3	1
GO:0043949	regulation of cAMP-mediated signaling	1/998	5/16374	0.269827	0.539986	0.482601	PEX5L	1
GO:0044206	UMP salvage	1/998	5/16374	0.269827	0.539986	0.482601	UPP2	1
GO:0044791	positive regulation by host of viral release from host cell	1/998	5/16374	0.269827	0.539986	0.482601	PC	1
GO:0045112	integrin biosynthetic process	1/998	5/16374	0.269827	0.539986	0.482601	TGFB2	1
GO:0045329	carnitine biosynthetic process	1/998	5/16374	0.269827	0.539986	0.482601	BBOX1	1
GO:0045541	negative regulation of cholesterol biosynthetic process	1/998	5/16374	0.269827	0.539986	0.482601	APOE	1
GO:0045636	positive regulation of melanocyte differentiation	1/998	5/16374	0.269827	0.539986	0.482601	BCL2	1
GO:0045760	positive regulation of action potential	1/998	5/16374	0.269827	0.539986	0.482601	ADRA1A	1
GO:0045794	negative regulation of cell volume	1/998	5/16374	0.269827	0.539986	0.482601	KCNMA1	1
[truncated: 2,182 more rows]

## Sheet: Fig5F qNSC1 downregulated genes
Down-regulated genes from qNSC1 during aging
	p_val	avg_log2FC	pct.1	pct.2	p_val_adj	gene	Diff	Type
1	0	-2.33319	0.283	0.943	0	KAZN	DOWN	NA
2	0	-1.63538	0.038	0.691	0	CSMD2	DOWN	NA
3	0	-1.99718	0.125	0.834	0	NTNG1	DOWN	NA
4	0	-2.35897	0.029	0.894	0	KCNT2	DOWN	NA
5	0	-1.21714	0.035	0.691	0	ACTN2	DOWN	NA
6	0	-1.52279	0.066	0.696	0	PLD5	DOWN	NA
7	0	-3.19167	0.258	0.964	0	SLC8A1	DOWN	NA
8	0	-2.52539	0.027	0.702	0	KCNH7	DOWN	NA
9	0	-1.70048	0.045	0.647	0	SCN1A	DOWN	NA
10	0	-1.80918	0.608	0.996	0	MAP2	DOWN	NA
11	0	-1.70622	0.118	0.726	0	RFTN1	DOWN	NA
12	0	-1.9537	0.447	0.92	0	ARHGEF3	DOWN	NA
13	0	-2.63227	0.436	0.984	0	CADPS	DOWN	NA
14	0	-2.09347	0.185	0.846	0	ROBO2	DOWN	NA
15	0	-3.22479	0.23	0.968	0	NLGN1	DOWN	NA
16	0	-0.990653	0.067	0.719	0	SPP1	DOWN	NA
17	0	-2.37318	0.256	0.933	0	GRID2	DOWN	NA
18	0	-2.19016	0.622	0.985	0	CAMK2D	DOWN	NA
19	0	-2.20765	0.009	0.778	0	IQGAP2	DOWN	NA
20	0	-2.09209	0.37	0.897	0	SQSTM1	DOWN	NA
21	0	-2.7231	0.054	0.935	0	CASC15	DOWN	NA
22	0	-2.01995	0.3	0.951	0	EEPD1	DOWN	NA
23	0	-2.80249	0.109	0.734	0	NAMPT	DOWN	NA
24	0	-1.82591	0.338	0.891	0	DPP6	DOWN	NA
25	0	-1.88756	0.112	0.724	0	UNC5D	DOWN	NA
26	0	-2.45689	0.12	0.797	0	SNTG1	DOWN	NA
27	0	-1.22617	0.083	0.694	0	FABP5	DOWN	NA
28	0	-1.34926	0.319	0.907	0	PTPRD	DOWN	NA
29	0	-1.58954	0.073	0.665	0	FRMD3	DOWN	NA
30	0	-2.7076	0.233	0.99	0	TNC	DOWN	NA
31	0	-1.95046	0.03	0.757	0	LMO2	DOWN	TF
32	0	-1.30264	1	1	0	MALAT1	DOWN	NA
33	0	-1.61251	0.568	0.96	0	PLXDC2	DOWN	NA
34	0	-2.42591	0.033	0.785	0	LRRTM3	DOWN	NA
35	0	-3.78124	0.218	0.995	0	DCLK1	DOWN	NA
36	0	-1.58652	0.321	0.92	0	GPC6	DOWN	NA
37	0	-1.96544	0.068	0.878	0	SYNE2	DOWN	NA
38	0	-3.04038	0.096	0.837	0	RGS6	DOWN	NA
39	0	-1.29182	0.76	0.997	0	MEIS2	DOWN	TF
40	0	-1.64343	0.447	0.978	0	TANC2	DOWN	NA
41	0	-1.93317	0.321	0.962	0	SETBP1	DOWN	TF
42	0	-1.19732	0.207	0.854	0	GPCPD1	DOWN	NA
43	0	-1.08722	0.998	1	0	MIR99AHG	DOWN	NA
44	0	-1.36804	0.408	0.94	0	APP	DOWN	NA
45	0	-2.57545	0.061	0.7	0	GRIK1	DOWN	NA
46	1.47391e-307	-1.19029	0.172	0.791	4.9432e-303	FRY	DOWN	NA
47	3.63286e-306	-1.37451	0.389	0.903	1.21839e-301	MARK1	DOWN	NA
48	1.625e-304	-1.22741	0.958	0.999	5.44994e-300	PTPRZ1	DOWN	NA
49	4.54647e-301	-1.80992	0.056	0.615	1.5248e-296	LDB2	DOWN	NA
50	1.50751e-298	-0.757218	0.998	1	5.05588e-294	PPP2R2B	DOWN	NA
51	4.75632e-296	-1.30504	0.059	0.632	1.59517e-291	PLCB4	DOWN	NA
52	1.05723e-291	-1.28421	0.743	0.978	3.54574e-287	PTN	DOWN	NA
53	8.84709e-290	-1.38275	0.526	0.95	2.96714e-285	LTBP1	DOWN	NA
54	1.12102e-287	-1.27752	0.429	0.901	3.75969e-283	RAB3GAP2	DOWN	NA
55	1.38862e-286	-1.26738	0.218	0.817	4.65715e-282	DGKB	DOWN	NA
56	4.3689e-285	-1.43769	0.596	0.973	1.46524e-280	DLGAP1	DOWN	NA
57	4.41729e-283	-1.16261	0.425	0.918	1.48147e-278	GLI2	DOWN	TF
58	5.87282e-282	-1.79845	0.27	0.813	1.96963e-277	GRIP1	DOWN	NA
59	1.23534e-281	-1.51233	0.106	0.669	4.1431e-277	HDAC9	DOWN	NA
60	4.13387e-278	-1.9684	0.073	0.608	1.38642e-273	DCC	DOWN	NA
61	4.20059e-277	-1.57158	0.005	0.515	1.40879e-272	LINC01965	DOWN	NA
62	4.41826e-276	-1.98285	0.352	0.852	1.48179e-271	KCND2	DOWN	NA
63	3.17373e-275	-1.03408	0.035	0.566	1.06441e-270	GRB10	DOWN	NA
64	1.39152e-273	-1.01908	0.882	0.999	4.66688e-269	TRIO	DOWN	NA
65	2.17277e-264	-1.14857	0.615	0.975	7.28704e-260	AKAP6	DOWN	NA
66	1.24236e-262	-1.19314	0.068	0.599	4.16664e-258	GULP1	DOWN	NA
67	1.09868e-260	-0.997206	0.35	0.87	3.68475e-256	PAXBP1	DOWN	NA
68	8.77577e-255	-1.14081	0.043	0.549	2.94322e-250	SH3GL2	DOWN	NA
69	1.63224e-254	-1.27904	0.295	0.825	5.47422e-250	PID1	DOWN	NA
70	2.72976e-254	-1.46746	0.238	0.762	9.15507e-250	ACTR3B	DOWN	NA
71	5.24357e-254	-1.25798	0.144	0.695	1.75859e-249	CREB5	DOWN	TF
72	2.10892e-248	-1.71786	0.06	0.562	7.07289e-244	LUZP2	DOWN	TF
73	1.50995e-247	-1.39638	0.171	0.696	5.06407e-243	AFF3	DOWN	NA
74	3.54007e-247	-1.21338	0.542	0.949	1.18727e-242	FIGN	DOWN	NA
75	2.87427e-246	-0.830914	0.96	0.999	9.63972e-242	PARD3B	DOWN	NA
76	9.83117e-246	-1.08664	0.351	0.864	3.29718e-241	PAM	DOWN	NA
77	9.54139e-243	-1.13127	0.213	0.737	3.19999e-238	CEBPD	DOWN	TF
78	1.34834e-242	-1.02659	0.595	0.964	4.52206e-238	ADK	DOWN	NA
79	6.76456e-242	-0.980621	0.637	0.971	2.2687e-237	CDK14	DOWN	NA
80	3.41656e-240	-1.33191	0.045	0.529	1.14585e-235	EPHA5	DOWN	NA
81	1.73034e-235	-1.16838	0.025	0.492	5.80322e-231	NCALD	DOWN	TF
82	1.99092e-233	-0.947039	0.166	0.704	6.67716e-229	CA12	DOWN	NA
83	3.69896e-232	-0.944595	0.829	0.99	1.24056e-227	BICD1	DOWN	NA
84	7.44979e-231	-0.922001	0.097	0.608	2.49851e-226	CCND2	DOWN	NA
85	2.00805e-229	-1.00701	0.631	0.957	6.7346e-225	DIP2B	DOWN	NA
86	1.56911e-228	-1.39067	0.492	0.889	5.26248e-224	NEGR1	DOWN	NA
87	5.06583e-228	-1.0956	0.722	0.972	1.69898e-223	ZEB1	DOWN	TF
88	1.9445e-227	-1.02538	0.402	0.907	6.52146e-223	PLCE1	DOWN	NA
89	3.36613e-227	-1.07956	0.012	0.455	1.12893e-222	ADAMTS6	DOWN	NA
90	6.36919e-226	-1.17649	0.131	0.629	2.1361e-221	PTPRE	DOWN	NA
91	1.71503e-224	-1.01206	0.905	0.997	5.75188e-220	SOX6	DOWN	TF
92	8.22712e-224	-0.923625	0.011	0.448	2.75921e-219	IRAK3	DOWN	NA
93	1.16054e-222	-0.995462	0.502	0.914	3.89222e-218	SEPT11	DOWN	NA
94	1.49409e-222	-1.06293	0.007	0.439	5.01088e-218	TOX3	DOWN	NA
95	3.36249e-221	-1.23986	0.007	0.437	1.12771e-216	RIT2	DOWN	NA
96	8.53878e-221	-1.27857	0.013	0.447	2.86374e-216	FAM129A	DOWN	NA
97	8.91514e-220	-1.33025	0.927	0.993	2.98996e-215	PDE4B	DOWN	NA
98	2.69766e-219	-1.0011	0.494	0.939	9.04741e-215	ST8SIA1	DOWN	NA
99	4.14524e-219	-0.791189	0.06	0.532	1.39023e-214	LINC00632	DOWN	NA
100	1.15366e-217	-1.0571	0.208	0.708	3.86916e-213	KIF5C	DOWN	NA
101	1.7223e-217	-0.98967	0.56	0.953	5.77626e-213	XKR6	DOWN	NA
102	1.83529e-217	-0.897442	0.69	0.971	6.15521e-213	XPO1	DOWN	NA
103	9.20825e-217	-0.802341	0.013	0.443	3.08826e-212	SLC8A1-AS1	DOWN	NA
104	3.05551e-216	-0.800399	0.064	0.532	1.02476e-211	ARSG	DOWN	NA
105	4.53081e-215	-0.879592	0.012	0.439	1.51954e-210	SULF2	DOWN	NA
106	7.4418e-215	-1.26706	0.457	0.88	2.49583e-210	DNER	DOWN	NA
107	1.85189e-212	-0.785182	0.28	0.795	6.21088e-208	HMGN1	DOWN	NA
108	4.89412e-212	-0.973337	0.042	0.488	1.64139e-207	CDH8	DOWN	NA
109	1.347e-211	-0.919933	0.152	0.664	4.51757e-207	HSPA5	DOWN	TF
110	2.3326e-211	-0.994223	0.667	0.97	7.82306e-207	PHACTR1	DOWN	NA
111	2.9731e-209	-1.23522	0.02	0.444	9.97119e-205	GAP43	DOWN	NA
112	1.08981e-208	-1.49822	0.308	0.782	3.655e-204	CD44	DOWN	NA
113	1.3911e-208	-1.02754	0.184	0.671	4.66547e-204	PRAG1	DOWN	NA
114	1.78989e-208	-0.768759	0.834	0.99	6.00293e-204	EXOC4	DOWN	NA
115	4.85647e-208	-0.753551	0.067	0.527	1.62876e-203	AGPAT4	DOWN	NA
116	5.50083e-208	-0.621688	0.003	0.41	1.84487e-203	GJC1	DOWN	NA
117	7.68193e-208	-0.949599	0.208	0.709	2.57637e-203	C15orf41	DOWN	NA
118	3.73531e-206	-0.8514	0.245	0.751	1.25275e-201	CALD1	DOWN	NA
119	7.49787e-206	-1.47664	0.057	0.495	2.51464e-201	EPB41L3	DOWN	NA
120	1.94717e-205	-1.15341	0.06	0.506	6.53043e-201	SULF1	DOWN	NA
121	2.60336e-204	-0.772326	0.17	0.679	8.73114e-200	TIMP2	DOWN	NA
122	3.6665e-202	-0.927768	0.153	0.654	1.22967e-197	AL591686.2	DOWN	NA
123	4.82322e-202	-0.967059	0.262	0.747	1.61761e-197	RNF180	DOWN	NA
124	1.36376e-201	-0.902749	0.051	0.491	4.57379e-197	BASP1	DOWN	NA
125	5.31522e-200	-1.1579	0.242	0.717	1.78262e-195	XYLT1	DOWN	NA
126	6.87251e-199	-0.979575	0.064	0.506	2.3049e-194	SLC4A10	DOWN	NA
127	5.44501e-198	-0.943661	0.553	0.946	1.82615e-193	GAB2	DOWN	NA
128	5.65505e-198	-1.07875	0.075	0.52	1.89659e-193	MYO16	DOWN	NA
129	1.76151e-196	-0.801839	0.028	0.44	5.90774e-192	PDPN	DOWN	NA
130	2.12336e-196	-0.710194	0.15	0.638	7.12132e-192	CD63	DOWN	NA
131	7.27969e-196	-0.755882	0.305	0.814	2.44146e-191	XRRA1	DOWN	NA
132	4.25546e-194	-1.21001	0.382	0.81	1.4272e-189	EVA1C	DOWN	NA
133	1.42409e-193	-0.833011	0.457	0.893	4.7761e-189	TRPM7	DOWN	NA
134	1.79248e-191	-1.00541	0.146	0.606	6.01162e-187	CSMD3	DOWN	NA
135	2.68157e-191	-0.92583	0.102	0.556	8.99345e-187	RANBP17	DOWN	NA
136	4.69873e-191	-0.688628	0.077	0.512	1.57586e-186	AP003086.2	DOWN	NA
137	1.10994e-189	-0.764204	0.071	0.504	3.7225e-185	MIR181A1HG	DOWN	NA
138	1.71016e-189	-0.973851	0.123	0.583	5.73555e-185	LINC01515	DOWN	NA
139	2.88213e-188	-0.817147	0.875	0.997	9.66608e-184	REV3L	DOWN	NA
140	7.48141e-188	-0.787296	0.16	0.624	2.50912e-183	CARS	DOWN	NA
141	6.84693e-187	-0.80362	0.151	0.622	2.29632e-182	HSP90B1	DOWN	NA
142	2.03491e-186	-1.07482	0.524	0.89	6.82468e-182	PDE8A	DOWN	NA
143	2.96959e-186	-1.74352	0.06	0.466	9.95941e-182	ADGRL2	DOWN	NA
144	6.43169e-186	-0.811984	0.519	0.92	2.15706e-181	FOXJ3	DOWN	TF
145	5.30123e-185	-0.945627	0.147	0.606	1.77793e-180	TUBA1A	DOWN	NA
146	8.88574e-185	-1.05569	0.467	0.866	2.9801e-180	LYST	DOWN	NA
147	9.04038e-185	-0.900747	0.382	0.84	3.03196e-180	SEMA6A	DOWN	NA
148	2.97223e-184	-1.04922	0.038	0.44	9.96826e-180	SLC44A5	DOWN	NA
149	5.0735e-183	-0.884087	0.637	0.946	1.70155e-178	AKAP13	DOWN	NA
150	2.51636e-182	-0.878075	0.768	0.978	8.43937e-178	HMGB1	DOWN	TF
151	3.65265e-182	-0.984473	0.75	0.957	1.22502e-177	SHROOM3	DOWN	NA
152	9.72501e-182	-0.625373	0.098	0.546	3.26157e-177	RPS2	DOWN	NA
153	8.78156e-181	-1.20335	0.234	0.673	2.94516e-176	LPAR1	DOWN	NA
154	2.07838e-180	-0.851279	0.202	0.67	6.97046e-176	DIAPH2	DOWN	NA
155	7.9458e-180	-1.20865	0.02	0.395	2.66486e-175	VAT1L	DOWN	NA
156	3.524e-177	-1.10689	0.977	0.998	1.18188e-172	GLIS3	DOWN	TF
157	4.13214e-177	-0.884882	0.259	0.721	1.38584e-172	KIAA1211	DOWN	NA
158	2.02119e-176	-0.74657	0.167	0.625	6.77866e-172	PRUNE2	DOWN	NA
159	6.13287e-176	-0.57506	0.113	0.57	2.05684e-171	RPL41	DOWN	NA
160	8.89524e-176	-0.830063	0.405	0.882	2.98329e-171	VCAN	DOWN	NA
161	6.84496e-175	-0.974914	0.226	0.681	2.29566e-170	H3F3B	DOWN	NA
162	9.48595e-175	-0.867227	0.117	0.546	3.1814e-170	SLC4A7	DOWN	NA
163	1.65958e-174	-0.768998	0.075	0.489	5.5659e-170	SORBS2	DOWN	NA
164	1.89772e-172	-0.729909	0.119	0.564	6.36458e-168	RPL35	DOWN	TF
165	2.24226e-172	-0.851562	0.962	0.996	7.5201e-168	MAML2	DOWN	NA
166	5.34701e-172	-1.15627	0.489	0.891	1.79328e-167	FTL	DOWN	NA
167	6.14855e-172	-0.849145	0.335	0.789	2.0621e-167	RAPGEF1	DOWN	NA
168	6.63415e-172	-0.805349	0.578	0.945	2.22496e-167	ANKFN1	DOWN	NA
169	3.86082e-171	-0.780675	0.808	0.985	1.29484e-166	JMJD1C	DOWN	NA
170	3.25985e-170	-0.871122	0.054	0.441	1.09329e-165	NOS1AP	DOWN	NA
171	5.75414e-170	-0.560866	0.13	0.582	1.92982e-165	RPS19	DOWN	NA
172	1.21637e-169	-0.74785	0.128	0.581	4.07947e-165	RPS15	DOWN	NA
173	2.17291e-169	-0.716109	0.818	0.988	7.2875e-165	TCF12	DOWN	TF
174	1.89654e-168	-0.717306	0.086	0.497	6.36061e-164	ARRDC3	DOWN	NA
175	2.95119e-168	-1.25143	0.091	0.491	9.8977e-164	KIF26B	DOWN	NA
176	4.0301e-167	-0.984687	0.443	0.849	1.35161e-162	MAP1B	DOWN	NA
177	4.73681e-167	-0.560118	0.121	0.56	1.58863e-162	CLCN6	DOWN	NA
178	7.21246e-167	-0.856488	0.216	0.673	2.41892e-162	BACH1	DOWN	TF
179	8.16331e-167	-0.850832	0.295	0.764	2.73781e-162	L3MBTL4	DOWN	NA
180	8.6397e-167	-0.65793	0.215	0.692	2.89758e-162	RPL13	DOWN	NA
181	1.7105e-166	-0.592452	0.018	0.377	5.73668e-162	TNFRSF19	DOWN	NA
182	7.48949e-166	-0.818609	0.548	0.906	2.51183e-161	AL139260.1	DOWN	NA
183	3.34826e-165	-0.701885	0.076	0.482	1.12294e-160	ASXL3	DOWN	NA
184	4.7966e-165	-0.599724	0.098	0.523	1.60869e-160	RPS18	DOWN	NA
185	3.96201e-164	-0.881624	0.275	0.72	1.32878e-159	FAM110B	DOWN	NA
186	4.36432e-164	-1.04102	0.085	0.473	1.46371e-159	CHST9	DOWN	NA
187	6.77529e-164	-0.772407	0.181	0.62	2.2723e-159	AP002026.1	DOWN	NA
188	1.60688e-163	-0.924138	0.037	0.401	5.38915e-159	CDH13	DOWN	NA
189	2.81614e-163	-0.729877	0.011	0.354	9.44478e-159	HAPLN1	DOWN	NA
190	9.3295e-163	-0.761591	0.29	0.756	3.12893e-158	VIM	DOWN	NA
191	5.54263e-162	-0.564757	0.074	0.476	1.85889e-157	DPY19L2	DOWN	NA
192	5.64361e-162	-1.02712	0.564	0.894	1.89275e-157	BACH2	DOWN	TF
193	1.32596e-161	-0.884476	0.51	0.883	4.447e-157	DOK5	DOWN	NA
194	1.80172e-161	-0.550851	0.09	0.502	6.04262e-157	RPS27A	DOWN	NA
195	2.11375e-161	-0.574552	0.048	0.424	7.08911e-157	MRC2	DOWN	NA
196	5.53106e-161	-0.885515	0.334	0.772	1.85501e-156	CLIC4	DOWN	NA
197	1.23047e-160	-0.639296	0.13	0.555	4.12674e-156	WASHC2A	DOWN	NA
198	2.83308e-160	-0.822367	0.475	0.859	9.50158e-156	RAB7A	DOWN	TF
199	4.98548e-159	-0.784055	0.11	0.517	1.67203e-154	SEMA5B	DOWN	NA
200	9.44327e-159	-0.807569	0.012	0.346	3.16708e-154	MYO3A	DOWN	NA
201	1.5765e-158	-1.33878	0.443	0.8	5.28726e-154	COLEC12	DOWN	NA
202	3.28579e-158	-0.906252	0.164	0.584	1.10199e-153	RTN1	DOWN	NA
203	5.00546e-158	-0.89077	0.458	0.849	1.67873e-153	STK39	DOWN	NA
204	1.67022e-157	-0.959133	0.271	0.725	5.60157e-153	NR2F2-AS1	DOWN	NA
205	1.67539e-157	-0.87738	0.419	0.815	5.61893e-153	PJA2	DOWN	NA
206	1.22197e-156	-0.732443	0.005	0.329	4.09823e-152	KCNK10	DOWN	NA
207	3.27359e-156	-0.920177	0.342	0.772	1.0979e-151	PMP2	DOWN	NA
208	2.61209e-154	-0.744404	0.031	0.379	8.76044e-150	MEG8	DOWN	NA
209	4.95484e-154	-1.00543	0.25	0.691	1.66175e-149	LRRTM4	DOWN	NA
210	1.79033e-153	-0.705408	0.14	0.566	6.00439e-149	MMP16	DOWN	NA
211	2.77934e-153	-0.843381	0.723	0.952	9.32135e-149	RAD51B	DOWN	NA
212	4.02237e-153	-0.769849	0.149	0.56	1.34902e-148	FOS	DOWN	TF
213	1.79903e-152	-0.560617	0.026	0.37	6.03358e-148	SCN3A	DOWN	NA
214	1.81614e-152	-0.715123	0.48	0.896	6.09097e-148	XPR1	DOWN	NA
215	4.2723e-152	-0.710087	0.564	0.916	1.43284e-147	TMEM131	DOWN	NA
216	4.71895e-152	-0.598738	0.004	0.319	1.58264e-147	MIR222HG	DOWN	NA
217	6.33959e-152	-0.681932	0.198	0.632	2.12617e-147	AC079385.1	DOWN	NA
218	1.83953e-151	-0.828352	0.49	0.858	6.16941e-147	ARHGAP42	DOWN	NA
219	4.34346e-151	-1.11499	0.048	0.399	1.45671e-146	AC233296.1	DOWN	NA
220	5.55988e-151	-1.52387	0.29	0.661	1.86467e-146	ELL2	DOWN	NA
221	8.11896e-151	-0.655682	0.04	0.386	2.72294e-146	DOCK11	DOWN	NA
222	2.82974e-149	-0.615694	0.865	0.993	9.49037e-145	ZFAND3	DOWN	NA
223	3.17724e-149	-0.827352	0.245	0.656	1.06558e-144	IARS	DOWN	NA
224	1.88694e-148	-1.11166	0.954	0.996	6.32843e-144	DLG2	DOWN	NA
225	1.98449e-148	-0.736189	0.431	0.843	6.6556e-144	CHD7	DOWN	NA
226	4.76016e-148	-0.719797	0.337	0.759	1.59646e-143	GALNT11	DOWN	NA
227	9.43864e-148	-0.755132	0.447	0.843	3.16553e-143	XRCC5	DOWN	NA
228	2.79353e-147	-0.536073	0.045	0.396	9.36895e-143	RRAGD	DOWN	NA
229	7.27512e-147	-1.17535	0.222	0.617	2.43993e-142	GRIA1	DOWN	NA
230	9.32102e-147	-0.865035	0.122	0.516	3.12608e-142	SIPA1L2	DOWN	NA
231	1.19686e-146	-0.568579	0.05	0.401	4.01401e-142	EPHB2	DOWN	NA
232	1.55062e-146	-0.508223	0.139	0.561	5.20048e-142	RPS28	DOWN	NA
233	1.88816e-146	-0.780513	0.042	0.386	6.33253e-142	ADAMTS3	DOWN	NA
234	6.66406e-146	-0.734028	0.326	0.753	2.23499e-141	PAG1	DOWN	NA
235	1.59136e-145	-1.0687	0.036	0.37	5.3371e-141	SORCS3	DOWN	NA
236	1.9456e-145	-0.772715	0.278	0.705	6.52516e-141	ADAM23	DOWN	NA
237	8.01586e-145	-0.662018	0.794	0.981	2.68836e-140	RBFOX2	DOWN	TF
238	8.04141e-145	-0.54073	0.111	0.516	2.69693e-140	RPL13A	DOWN	NA
239	2.19225e-144	-1.04744	0.131	0.512	7.35235e-140	CENPP	DOWN	NA
240	1.22146e-143	-0.721098	0.434	0.836	4.09654e-139	TULP4	DOWN	NA
241	4.35883e-143	-0.613276	0.393	0.828	1.46186e-138	TP53BP1	DOWN	NA
242	4.47048e-142	-0.804851	0.332	0.733	1.49931e-137	ANKRD6	DOWN	NA
243	7.75528e-142	-0.672842	0.156	0.56	2.60097e-137	TTLL7	DOWN	NA
244	7.84846e-142	-0.510832	0.01	0.315	2.63222e-137	SLC16A6	DOWN	NA
245	1.19075e-141	-0.803681	0.403	0.8	3.99355e-137	TANC1	DOWN	NA
246	1.31348e-141	-0.521268	0.084	0.453	4.40515e-137	RENBP	DOWN	NA
247	1.70871e-141	-0.840243	0.512	0.866	5.73067e-137	ENAH	DOWN	NA
248	1.7534e-141	-0.562296	0.256	0.693	5.88054e-137	NBPF15	DOWN	NA
249	3.46124e-141	-1.07419	0.013	0.318	1.16083e-136	DACH2	DOWN	NA
250	6.02565e-141	-0.877926	0.14	0.526	2.02088e-136	ARL15	DOWN	NA
251	1.26097e-140	-0.449887	0.104	0.503	4.22903e-136	RPL36	DOWN	NA
252	3.68444e-140	-0.463255	0.019	0.334	1.23569e-135	TMEM158	DOWN	NA
253	3.76785e-140	-0.8293	0.048	0.383	1.26366e-135	PAK3	DOWN	NA
254	4.33985e-140	-1.16283	0.044	0.374	1.4555e-135	GALNTL6	DOWN	NA
255	6.21634e-140	-0.665175	0.325	0.748	2.08483e-135	PGAP1	DOWN	NA
256	4.37874e-139	-0.653569	0.682	0.953	1.46854e-134	WSB1	DOWN	NA
257	8.39464e-139	-0.742546	0.276	0.698	2.81539e-134	CAMK4	DOWN	NA
258	1.18598e-138	-0.436836	0.077	0.445	3.97755e-134	DHX34	DOWN	NA
259	2.54235e-138	-0.625619	0.421	0.845	8.52655e-134	SMC5	DOWN	NA
260	2.92509e-138	-0.481525	0.044	0.375	9.81016e-134	ACADL	DOWN	NA
261	3.33164e-138	-0.442012	0.009	0.307	1.11736e-133	AP005433.1	DOWN	NA
262	1.50666e-137	-0.568368	0.113	0.487	5.05304e-133	AP000462.1	DOWN	NA
263	1.76789e-137	-2.10557	0.026	0.334	5.92917e-133	RASGEF1B	DOWN	NA
264	7.46351e-137	-0.683917	0.184	0.586	2.50311e-132	JUN	DOWN	TF
265	8.16259e-137	-0.953396	0.161	0.546	2.73757e-132	NEXMIF	DOWN	NA
266	1.41539e-136	-0.593853	0.982	1	4.74695e-132	SORBS1	DOWN	NA
267	4.10938e-136	-0.83467	0.625	0.921	1.3782e-131	NOVA1	DOWN	NA
268	1.11625e-135	-0.591074	0.169	0.568	3.74369e-131	HSPD1	DOWN	NA
269	2.19148e-135	-0.679013	0.684	0.956	7.34978e-131	TBL1XR1	DOWN	TF
270	2.78095e-135	-0.682789	0.498	0.873	9.32676e-131	SMG6	DOWN	NA
271	4.84738e-135	-0.984148	0.022	0.327	1.62571e-130	SLC2A3	DOWN	NA
272	1.26468e-134	-0.58041	0.219	0.637	4.24148e-130	CEP83	DOWN	NA
273	3.37301e-134	-0.699873	0.295	0.699	1.13124e-129	ABCB7	DOWN	NA
274	5.84294e-134	-0.823705	0.541	0.866	1.95961e-129	DLEU2	DOWN	NA
275	8.62499e-134	-0.802512	0.013	0.306	2.89265e-129	BASP1-AS1	DOWN	NA
276	9.28293e-134	-0.549977	0.07	0.414	3.11331e-129	AP001825.1	DOWN	NA
277	1.18515e-133	-0.487603	0.095	0.458	3.97476e-129	ZBTB20-AS5	DOWN	NA
278	1.39615e-132	-0.618411	0.024	0.327	4.6824e-128	COL4A6	DOWN	NA
279	1.5931e-131	-1.72728	0.506	0.76	5.34295e-127	2022-03-03	DOWN	NA
280	2.33361e-131	-0.467486	0.097	0.464	7.82646e-127	RACK1	DOWN	NA
281	2.47574e-131	-0.925795	0.502	0.845	8.30313e-127	NLGN4Y	DOWN	NA
282	2.90262e-131	-0.45767	0.078	0.432	9.73482e-127	RPS8	DOWN	NA
283	4.23777e-131	-0.667392	0.368	0.764	1.42126e-126	IGF2R	DOWN	NA
284	8.68376e-131	-0.438158	0.07	0.418	2.91236e-126	RPL7A	DOWN	NA
285	1.29827e-130	-0.624163	0.457	0.862	4.35414e-126	SLC25A13	DOWN	NA
286	1.32853e-130	-0.508776	0.062	0.401	4.45561e-126	MEST	DOWN	NA
287	1.33773e-130	-0.577323	0.117	0.484	4.4865e-126	GARS	DOWN	NA
288	1.55282e-130	-0.698515	0.694	0.953	5.20783e-126	CDC14B	DOWN	NA
289	3.701e-130	-0.484293	0.001	0.274	1.24124e-125	TFPI	DOWN	NA
290	9.09173e-130	-1.38541	0.038	0.34	3.04919e-125	SORCS1	DOWN	NA
291	2.0969e-129	-0.463051	0.122	0.503	7.03259e-125	HIC2	DOWN	TF
292	3.31179e-129	-0.736982	0.01	0.292	1.11071e-124	IGF2BP2	DOWN	NA
293	1.70045e-128	-1.21239	0.042	0.354	5.70297e-124	NRG1	DOWN	NA
294	2.2743e-128	-0.506478	0.019	0.309	7.62755e-124	ICA1	DOWN	NA
295	2.28291e-128	-0.581352	0.353	0.78	7.65643e-124	CLCN3	DOWN	NA
296	2.67273e-128	-0.574634	0.01	0.29	8.96379e-124	EDNRA	DOWN	NA
297	5.31579e-128	-0.459196	0.017	0.306	1.78281e-123	TC2N	DOWN	NA
298	5.99744e-128	-0.515497	0.181	0.574	2.01142e-123	RPS4Y1	DOWN	NA
299	7.71551e-128	-0.939816	0.007	0.282	2.58763e-123	SNTG2	DOWN	NA
300	2.04191e-127	-0.555832	0.057	0.382	6.84817e-123	SLC7A1	DOWN	NA
301	2.55098e-127	-0.455391	0.101	0.46	8.55549e-123	SNX8	DOWN	NA
302	2.97562e-127	-0.477543	1	1	9.97963e-123	NPAS3	DOWN	NA
303	1.43655e-126	-0.921667	0.243	0.629	4.81791e-122	YBX3	DOWN	NA
304	3.40638e-126	-0.486676	0.207	0.614	1.14243e-121	ZSCAN18	DOWN	TF
305	5.8703e-126	-0.747641	0.348	0.74	1.96878e-121	GMDS	DOWN	NA
306	7.41259e-126	-0.751876	0.005	0.275	2.48603e-121	HS6ST2	DOWN	NA
307	1.50552e-125	-0.561165	0.141	0.511	5.04922e-121	FAM3C	DOWN	NA
308	1.52061e-125	-0.482316	0.033	0.335	5.09981e-121	PXDN	DOWN	NA
309	1.73708e-125	-0.806573	0.724	0.937	5.82582e-121	TMEM178B	DOWN	NA
310	1.75462e-125	-0.545936	0.298	0.718	5.88463e-121	AP2A2	DOWN	NA
311	1.99222e-125	-0.578127	0.106	0.467	6.68149e-121	RPL19	DOWN	NA
312	3.16287e-125	-0.762164	0.592	0.897	1.06076e-120	FAM135A	DOWN	NA
313	5.67048e-125	-0.666885	0.207	0.603	1.90176e-120	ARID5B	DOWN	TF
314	2.74288e-124	-0.590706	0.036	0.334	9.19907e-120	MCUB	DOWN	NA
315	3.84681e-124	-0.505486	0.225	0.627	1.29014e-119	ZNF337	DOWN	TF
316	1.69098e-123	-0.579709	0.271	0.688	5.67121e-119	SHLD2	DOWN	NA
317	3.38262e-123	-0.48395	0.15	0.528	1.13446e-118	WASHC2C	DOWN	NA
318	6.01756e-123	-0.512207	0.013	0.288	2.01817e-118	CCDC175	DOWN	NA
319	1.48272e-122	-0.492484	0.077	0.413	4.97276e-118	RPL8	DOWN	NA
320	3.55057e-122	-0.403573	0.091	0.443	1.19079e-117	RPL6	DOWN	TF
321	5.64632e-122	-0.368842	0.011	0.281	1.89366e-117	AC015923.1	DOWN	NA
322	7.48413e-122	-0.578767	0.892	0.993	2.51003e-117	TTC28	DOWN	NA
323	1.17877e-121	-0.455415	0.159	0.545	3.95337e-117	CALR	DOWN	NA
324	1.37054e-121	-0.471568	0.207	0.614	4.59651e-117	EEF1A1	DOWN	NA
325	1.92172e-121	-0.507192	0.126	0.498	6.44505e-117	RPL11	DOWN	NA
326	2.06115e-121	-0.597965	0.794	0.975	6.91267e-117	EIF4G3	DOWN	NA
327	2.99444e-121	-0.800066	0.149	0.511	1.00427e-116	CRISPLD1	DOWN	NA
328	4.30175e-121	-0.468224	0.142	0.517	1.44272e-116	TACC2	DOWN	NA
329	9.29674e-121	-0.536394	0.305	0.723	3.11794e-116	CANX	DOWN	TF
330	2.19737e-120	-0.649182	0.497	0.858	7.36954e-116	SOX2	DOWN	TF
331	3.34725e-120	-0.630109	0.381	0.775	1.1226e-115	MICU1	DOWN	NA
332	3.36186e-120	-0.662344	0.651	0.94	1.1275e-115	RNF130	DOWN	NA
333	7.44829e-120	-0.598741	0.286	0.679	2.49801e-115	CFDP1	DOWN	NA
334	9.19252e-120	-0.402612	0.015	0.287	3.08299e-115	MEG3	DOWN	NA
335	1.93397e-119	-0.704869	0.487	0.834	6.48614e-115	APBA1	DOWN	NA
336	3.5385e-119	-0.721821	0.161	0.529	1.18674e-114	ANK3	DOWN	NA
337	4.85849e-119	-0.694831	0.675	0.927	1.62944e-114	NSMCE2	DOWN	NA
338	9.56364e-119	-0.882291	0.195	0.565	3.20745e-114	2022-03-01	DOWN	NA
339	1.43108e-118	-0.549081	0.394	0.8	4.79954e-114	ATM	DOWN	NA
340	1.44862e-118	-0.604482	0.015	0.282	4.85839e-114	TSPAN18	DOWN	NA
341	7.24377e-118	-0.527353	0.002	0.252	2.42942e-113	NOX4	DOWN	NA
342	8.74942e-118	-0.496268	0.311	0.716	2.93438e-113	SGSM2	DOWN	NA
343	1.22084e-117	-0.5979	0.111	0.455	4.09444e-113	B2M	DOWN	NA
344	1.34018e-117	-0.761808	0.062	0.372	4.49469e-113	SGCZ	DOWN	NA
345	1.95764e-117	-0.390765	0.04	0.336	6.56552e-113	AC009690.2	DOWN	NA
346	2.03596e-117	-0.901465	0.081	0.391	6.8282e-113	PDE1A	DOWN	NA
347	4.0927e-117	-0.7564	0.004	0.255	1.37261e-112	ATF3	DOWN	TF
348	5.19719e-117	-0.433605	0.092	0.426	1.74303e-112	GPAT4	DOWN	NA
349	6.21592e-117	-0.45369	0.093	0.43	2.0847e-112	RPL3	DOWN	NA
350	1.87628e-116	-0.764959	0.171	0.528	6.29267e-112	NPNT	DOWN	NA
351	3.83259e-116	-0.414822	0.012	0.274	1.28537e-111	NINJ2	DOWN	NA
352	7.90382e-116	-0.585735	0.827	0.982	2.65078e-111	DIP2C	DOWN	NA
353	7.95363e-116	-0.379527	0.072	0.394	2.66749e-111	GNPDA1	DOWN	NA
354	1.59063e-115	-0.530941	0.132	0.484	5.33465e-111	SRGAP2	DOWN	NA
355	3.16125e-115	-0.591516	0.852	0.984	1.06022e-110	ZHX2	DOWN	TF
356	3.23426e-115	-0.454187	0.164	0.547	1.08471e-110	RPL28	DOWN	NA
357	3.43515e-115	-0.408144	0.085	0.416	1.15208e-110	RPS12	DOWN	NA
358	8.11371e-115	-0.513808	0.024	0.297	2.72118e-110	ELAVL4	DOWN	NA
359	9.53332e-115	-0.580957	0.208	0.58	3.19728e-110	LIMD1	DOWN	NA
360	1.1646e-114	-0.468104	0.006	0.256	3.90585e-110	PWRN1	DOWN	NA
361	1.64016e-114	-0.551798	0.012	0.271	5.50076e-110	SLC16A12	DOWN	NA
362	3.54147e-114	-0.56658	0.618	0.923	1.18774e-109	ANKRD11	DOWN	NA
363	5.93534e-114	-0.810286	0.393	0.739	1.99059e-109	HOPX	DOWN	NA
364	6.25119e-114	-0.540638	0.358	0.752	2.09653e-109	PIK3CB	DOWN	NA
365	1.47616e-113	-0.391134	0.068	0.382	4.95073e-109	FAU	DOWN	NA
366	1.68598e-113	-0.536344	0.281	0.67	5.65445e-109	MAST2	DOWN	NA
367	3.65713e-113	-0.642162	0.468	0.821	1.22653e-108	APBB2	DOWN	NA
368	3.84826e-113	-0.46948	0.185	0.563	1.29063e-108	PARP11	DOWN	NA
369	4.03271e-113	-0.573253	0.377	0.77	1.35249e-108	COL4A5	DOWN	NA
370	4.25048e-113	-0.482368	0.177	0.555	1.42552e-108	YWHAQ	DOWN	NA
371	5.01674e-113	-0.586308	0.379	0.766	1.68252e-108	LRPPRC	DOWN	NA
372	6.58189e-113	-0.586931	0.202	0.569	2.20744e-108	SCN8A	DOWN	NA
373	6.78797e-113	-0.570937	0.159	0.514	2.27655e-108	ABCC4	DOWN	NA
374	7.03039e-113	-0.749918	0.155	0.496	2.35785e-108	RETREG1	DOWN	NA
375	1.15793e-112	-0.562794	0.056	0.352	3.88347e-108	DGKI	DOWN	NA
376	1.32833e-112	-0.578727	0.502	0.853	4.45495e-108	ACBD6	DOWN	NA
377	2.10715e-112	-0.47671	0.103	0.435	7.06696e-108	HELB	DOWN	NA
378	4.63977e-112	-0.655575	0.177	0.531	1.55609e-107	FBXL2	DOWN	NA
379	5.17083e-112	-0.991276	0.364	0.749	1.73419e-107	CSMD1	DOWN	NA
380	7.00147e-112	-0.496464	0.145	0.497	2.34815e-107	ALDH3A2	DOWN	NA
381	7.1819e-112	-0.33463	0.017	0.278	2.40867e-107	MDK	DOWN	NA
382	7.54533e-112	-0.48405	0.177	0.545	2.53055e-107	THUMPD2	DOWN	NA
383	1.09325e-111	-0.376221	0.005	0.249	3.66655e-107	CNGA3	DOWN	NA
384	1.13154e-111	-0.721374	0.533	0.862	3.79495e-107	MKL1	DOWN	NA
385	1.15215e-111	-0.412971	0.039	0.323	3.86407e-107	THBS2	DOWN	NA
386	1.44492e-111	-0.529713	0.203	0.586	4.84596e-107	DBI	DOWN	NA
387	1.55566e-111	-0.605386	0.394	0.777	5.21736e-107	TBC1D32	DOWN	NA
388	1.7974e-111	-0.649058	0.014	0.268	6.02812e-107	TMEM163	DOWN	NA
389	3.6271e-111	-0.363065	0.045	0.334	1.21646e-106	RPL10A	DOWN	NA
390	3.76906e-111	-0.422288	0.049	0.339	1.26407e-106	DDIT3	DOWN	TF
391	5.60136e-111	-0.584144	0.125	0.457	1.87858e-106	SIAH1	DOWN	NA
392	6.34207e-111	-0.489092	0.285	0.684	2.127e-106	DIP2A	DOWN	NA
393	1.31825e-110	-0.514026	0.267	0.651	4.42114e-106	ATP6V1C1	DOWN	NA
394	2.25442e-110	-0.41474	0.168	0.538	7.56087e-106	RPL10	DOWN	NA
395	4.50717e-110	-0.764125	0.027	0.288	1.51162e-105	ALDH1A2	DOWN	NA
396	7.02888e-109	-0.432864	0.203	0.585	2.35734e-104	ILF3	DOWN	NA
397	7.55405e-109	-0.567138	0.407	0.784	2.53348e-104	DENND5A	DOWN	NA
398	8.06065e-109	-0.553249	0.48	0.848	2.70338e-104	NRDC	DOWN	NA
399	8.79513e-109	-0.726737	0.822	0.982	2.94971e-104	SAMD4A	DOWN	NA
400	1.26535e-108	-0.922345	0.587	0.85	4.24372e-104	ITGA6	DOWN	NA
401	1.38092e-108	-0.448939	0.009	0.251	4.63132e-104	AC010127.1	DOWN	NA
402	2.2167e-108	-0.564053	0.469	0.853	7.43436e-104	FNDC3A	DOWN	NA
403	3.41604e-108	-0.443016	0.079	0.391	1.14567e-103	RPS6	DOWN	NA
404	3.55414e-108	-0.727279	0.581	0.909	1.19199e-103	TPST1	DOWN	NA
405	5.88203e-108	-0.371382	0.044	0.324	1.97272e-103	AMDHD2	DOWN	NA
406	1.08679e-107	-0.778218	0.78	0.961	3.64489e-103	PTPN13	DOWN	NA
407	1.47837e-107	-0.74627	0.632	0.893	4.95816e-103	EXT1	DOWN	NA
408	1.53405e-107	-0.605272	0.01	0.251	5.1449e-103	ADAMTS12	DOWN	NA
409	1.57941e-107	-0.581251	0.354	0.726	5.29703e-103	AGPAT5	DOWN	NA
410	2.2022e-107	-0.582988	0.185	0.539	7.38573e-103	GBE1	DOWN	NA
411	2.27762e-107	-0.735094	0.045	0.319	7.63867e-103	PDGFD	DOWN	NA
412	3.15605e-107	-0.725021	0.094	0.406	1.05848e-102	DNAH14	DOWN	NA
413	4.17799e-107	-0.454457	0.175	0.542	1.40122e-102	EIF1	DOWN	NA
414	5.85142e-107	-0.443169	0.015	0.262	1.96245e-102	ANXA2	DOWN	NA
415	7.0107e-107	-0.543565	0.617	0.931	2.35125e-102	KMT2E	DOWN	NA
416	8.22618e-107	-0.606529	0.622	0.923	2.7589e-102	STAG1	DOWN	NA
417	1.0064e-106	-0.731818	0.117	0.429	3.37528e-102	GRK5	DOWN	NA
418	1.32504e-106	-0.492673	0.368	0.763	4.44391e-102	ARL8B	DOWN	NA
419	1.47544e-106	-0.476948	0.348	0.747	4.94834e-102	DHX36	DOWN	TF
420	1.54533e-106	-0.429897	0.06	0.352	5.18273e-102	WIPF3	DOWN	NA
421	2.5543e-106	-0.71646	0.096	0.4	8.56662e-102	ANKRD30BL	DOWN	NA
422	8.18073e-106	-0.5696	0.677	0.946	2.74365e-101	SRPK2	DOWN	NA
423	1.04794e-105	-0.412678	0.065	0.357	3.51457e-101	KLHL25	DOWN	NA
424	1.51702e-105	-0.476243	0.387	0.782	5.08777e-101	PRMT2	DOWN	NA
425	2.86038e-105	-0.602669	0.823	0.984	9.59316e-101	ASAP1	DOWN	NA
426	5.31657e-105	-0.386772	0.148	0.5	1.78307e-100	MFSD1	DOWN	NA
427	8.75873e-105	-0.830601	0.268	0.616	2.9375e-100	WTAP	DOWN	NA
428	1.81956e-104	-0.557359	0.386	0.756	6.10245e-100	COL4A3BP	DOWN	NA
429	2.14471e-104	-0.556897	0.685	0.948	7.19294e-100	CDKAL1	DOWN	NA
430	4.21359e-104	-0.552151	0.011	0.248	1.41315e-99	VLDLR-AS1	DOWN	NA
431	5.13458e-104	-0.570562	0.605	0.904	1.72204e-99	TTC7B	DOWN	NA
432	5.32049e-104	-0.985049	0.498	0.794	1.78439e-99	ANOS1	DOWN	NA
433	8.93824e-104	-0.526384	0.389	0.768	2.99771e-99	SPART	DOWN	NA
434	1.28812e-103	-0.405069	0.142	0.486	4.32008e-99	GFM1	DOWN	NA
435	1.57193e-103	-0.483275	0.128	0.454	5.27194e-99	STK40	DOWN	NA
436	1.81913e-103	-0.76608	0.723	0.94	6.10099e-99	PTCHD1-AS	DOWN	NA
437	2.69358e-103	-0.508659	0.173	0.52	9.03373e-99	PARP8	DOWN	NA
438	3.95863e-103	-0.765939	0.038	0.3	1.32765e-98	PTPRT	DOWN	NA
439	4.64453e-103	-0.445738	0.19	0.554	1.55768e-98	TTC27	DOWN	NA
440	6.3858e-103	-0.777266	0.247	0.578	2.14167e-98	STOX2	DOWN	NA
441	1.15986e-102	-0.464515	0.18	0.529	3.88994e-98	ESF1	DOWN	NA
442	1.69787e-102	-0.338138	0.056	0.337	5.69433e-98	SPDYE2	DOWN	NA
443	1.82979e-102	-0.737642	0.161	0.492	6.13675e-98	DPYD	DOWN	NA
444	2.0302e-102	-0.663436	0.197	0.543	6.8089e-98	CTNNA3	DOWN	NA
445	2.12232e-102	-0.441296	0.133	0.46	7.11783e-98	PEPD	DOWN	NA
446	2.69174e-102	-0.464606	0.032	0.288	9.02755e-98	TMEM131L	DOWN	NA
447	4.25448e-102	-0.565346	0.537	0.871	1.42687e-97	HNRNPC	DOWN	TF
448	4.34386e-102	-0.894005	0.37	0.697	1.45684e-97	SDK1	DOWN	NA
449	4.89498e-102	-0.535008	0.079	0.372	1.64168e-97	IRAK2	DOWN	NA
450	8.64944e-102	-0.51954	0.66	0.944	2.90085e-97	TTC3	DOWN	NA
451	1.02579e-101	-0.408294	0.216	0.586	3.44029e-97	NUS1	DOWN	NA
452	1.07474e-101	-0.49603	0.257	0.636	3.60446e-97	CLIP2	DOWN	NA
453	1.73435e-101	-0.440882	0.996	1	5.81665e-97	ADGRB3	DOWN	NA
454	1.77945e-101	-0.78261	0.158	0.479	5.96791e-97	MAN1C1	DOWN	NA
455	2.1219e-101	-0.470487	0.055	0.331	7.11642e-97	AFAP1	DOWN	NA
456	2.27448e-101	-0.427469	0.091	0.39	7.62816e-97	SARS	DOWN	NA
457	4.26325e-101	-0.573179	0.132	0.449	1.42981e-96	PRTG	DOWN	NA
458	5.49988e-101	-0.357942	0.138	0.475	1.84455e-96	KLHDC4	DOWN	NA
459	5.984e-101	-0.420365	0.157	0.502	2.00692e-96	AARS	DOWN	NA
460	6.75782e-101	-0.586445	0.221	0.574	2.26644e-96	MAP3K20	DOWN	NA
461	7.54691e-101	-0.484177	0.016	0.251	2.53108e-96	KLHL4	DOWN	NA
462	1.41604e-100	-0.528668	0.361	0.732	4.74913e-96	ARHGAP12	DOWN	NA
463	2.84161e-100	-0.437357	0.102	0.411	9.53018e-96	CA13	DOWN	NA
464	4.42543e-100	-0.391004	0.003	0.221	1.4842e-95	CELSR1	DOWN	NA
465	1.64172e-99	-0.654166	0.093	0.387	5.50601e-95	WARS	DOWN	NA
466	1.76904e-99	-0.497909	0.409	0.788	5.933e-95	TTC37	DOWN	NA
467	2.46162e-99	-0.492537	0.556	0.896	8.25578e-95	ZMYM4	DOWN	NA
468	2.9071e-99	-0.508888	0.018	0.252	9.74984e-95	SLC16A7	DOWN	NA
469	3.13727e-99	-0.569078	0.146	0.484	1.05218e-94	RPS27	DOWN	NA
470	5.25917e-99	-0.642553	0.768	0.956	1.76382e-94	BRINP3	DOWN	NA
471	1.0162e-98	-0.552531	0.208	0.554	3.40813e-94	UBE3D	DOWN	NA
472	1.05561e-98	-0.407062	0.16	0.494	3.54031e-94	AC005332.5	DOWN	NA
473	1.53707e-98	-0.591983	0.253	0.605	5.15502e-94	TRIM24	DOWN	TF
474	1.8293e-98	-0.49293	0.277	0.642	6.13511e-94	LARS2	DOWN	NA
475	2.02318e-98	-0.488941	0.141	0.463	6.78535e-94	TUSC3	DOWN	NA
476	3.50973e-98	-0.463665	0.05	0.316	1.17709e-93	CNTN3	DOWN	NA
477	4.75966e-98	-0.492727	0.618	0.926	1.59629e-93	KIDINS220	DOWN	NA
478	7.41128e-98	-0.676745	0.933	0.986	2.48559e-93	MAST4	DOWN	NA
479	8.7038e-98	-0.981644	0.758	0.93	2.91908e-93	IMMP2L	DOWN	NA
480	9.49875e-98	-0.335084	0.09	0.391	3.18569e-93	RPS9	DOWN	NA
481	1.21113e-97	-0.596857	0.021	0.258	4.0619e-93	SCG2	DOWN	NA
482	1.2809e-97	-0.515617	0.438	0.813	4.29589e-93	TFCP2	DOWN	TF
483	1.35822e-97	-0.795222	0.701	0.904	4.55521e-93	AGBL4	DOWN	NA
484	2.14575e-97	-0.583768	0.038	0.287	7.19641e-93	KCNH8	DOWN	NA
485	2.15323e-97	-1.15463	0.252	0.588	7.22151e-93	NRXN3	DOWN	NA
486	2.90566e-97	-0.376033	0.02	0.255	9.74499e-93	RIPOR3	DOWN	NA
487	4.39706e-97	-0.547227	0.764	0.967	1.47469e-92	FAM172A	DOWN	NA
488	4.68852e-97	-0.434625	0.175	0.511	1.57244e-92	TAF1B	DOWN	NA
489	7.82741e-97	-0.299984	0.015	0.245	2.62516e-92	MMP14	DOWN	NA
490	2.16113e-96	-0.329817	0.073	0.36	7.24799e-92	TMSB10	DOWN	NA
491	2.25212e-96	-0.44058	0.089	0.381	7.55316e-92	CCDC80	DOWN	NA
492	2.27241e-96	-0.34738	0.134	0.464	7.62121e-92	TMSB4X	DOWN	NA
493	6.55747e-96	-0.269346	0	0.206	2.19924e-91	LINC02455	DOWN	NA
494	7.1506e-96	-0.534452	0.51	0.851	2.39817e-91	NEK6	DOWN	NA
495	1.45644e-95	-0.581412	0.28	0.63	4.88461e-91	PLAGL1	DOWN	TF
496	2.40112e-95	-0.468656	0.212	0.559	8.05287e-91	FNIP2	DOWN	NA
497	2.91372e-95	-0.552993	0.263	0.619	9.77204e-91	TRERF1	DOWN	NA
498	3.50773e-95	-0.649052	0.133	0.434	1.17642e-90	PVT1	DOWN	NA
499	3.54058e-95	-0.400777	0.145	0.468	1.18744e-90	TRMT11	DOWN	NA
500	5.08267e-95	-0.382706	0.086	0.38	1.70463e-90	RPL24	DOWN	NA
501	6.55431e-95	-0.447041	0.081	0.363	2.19819e-90	FAT4	DOWN	NA
502	1.08231e-94	-0.43881	0.333	0.716	3.62987e-90	UNK	DOWN	NA
503	1.49669e-94	-0.344905	0.205	0.573	5.01959e-90	SAT2	DOWN	NA
504	1.82352e-94	-0.377754	0.139	0.464	6.11574e-90	PDIA6	DOWN	NA
505	1.99227e-94	-0.500416	0.241	0.594	6.68166e-90	CCNL1	DOWN	NA
506	2.2086e-94	-0.656417	0.816	0.966	7.40722e-90	TMTC2	DOWN	NA
507	2.53036e-94	-0.301754	0.039	0.29	8.48633e-90	RPS10	DOWN	TF
508	2.75689e-94	-0.39924	0.126	0.435	9.24607e-90	URB1	DOWN	NA
509	5.11688e-94	-0.478016	0.007	0.219	1.7161e-89	CXCL2	DOWN	NA
510	5.64632e-94	-0.446357	0.142	0.466	1.89366e-89	CAP2	DOWN	NA
511	7.06327e-94	-0.47879	0.347	0.732	2.36888e-89	UNC80	DOWN	NA
512	7.45612e-94	-0.583798	0.025	0.256	2.50064e-89	AC005165.1	DOWN	NA
513	8.93358e-94	-0.432379	0.335	0.726	2.99615e-89	TSPAN3	DOWN	NA
514	1.48773e-93	-0.614011	0.163	0.482	4.98955e-89	PDE1C	DOWN	NA
515	4.15469e-93	-0.581525	0.652	0.932	1.3934e-88	SPIDR	DOWN	NA
516	4.40129e-93	-0.611235	0.034	0.276	1.47611e-88	SLIT2	DOWN	NA
517	1.1633e-92	-0.529453	0.325	0.682	3.90146e-88	FAM20C	DOWN	NA
518	1.56951e-92	-0.359465	0.026	0.258	5.26383e-88	ADD2	DOWN	NA
519	3.98879e-92	-0.386462	0.114	0.416	1.33776e-87	CD9	DOWN	NA
520	4.40057e-92	-0.432637	0.188	0.525	1.47586e-87	YARS	DOWN	NA
521	1.19418e-91	-0.313656	0.083	0.371	4.00505e-87	RPS23	DOWN	NA
522	1.26197e-91	-0.468826	0.193	0.527	4.2324e-87	DDX10	DOWN	NA
523	1.46924e-91	-0.438492	0.124	0.425	4.92754e-87	N4BP2	DOWN	NA
524	1.83293e-91	-0.69625	0.609	0.881	6.14728e-87	ETV6	DOWN	TF
525	2.11617e-91	-0.355697	0.142	0.465	7.09722e-87	LPCAT1	DOWN	NA
526	2.51426e-91	-0.481565	0.049	0.299	8.43231e-87	ZNF385D	DOWN	TF
527	3.83934e-91	-0.479487	0.29	0.642	1.28764e-86	KATNAL1	DOWN	NA
528	1.49735e-90	-0.520579	0.641	0.921	5.02181e-86	GSK3B	DOWN	NA
529	1.59772e-90	-0.422159	0.387	0.764	5.35844e-86	FUS	DOWN	NA
530	1.74954e-90	-0.437045	0.268	0.629	5.86761e-86	SCAI	DOWN	NA
531	1.86797e-90	-0.424346	0.37	0.755	6.26479e-86	WASHC4	DOWN	NA
532	4.25059e-90	-0.690397	0.544	0.868	1.42556e-85	HSP90AA1	DOWN	NA
533	1.1162e-89	-1.20914	0.085	0.345	3.74352e-85	GRIN2A	DOWN	NA
534	2.75795e-89	-0.572155	0.444	0.776	9.2496e-85	UBE2E1	DOWN	NA
535	2.99664e-89	-0.332192	0.003	0.2	1.00501e-84	BCHE	DOWN	NA
536	6.12845e-89	-0.495626	0.031	0.261	2.05536e-84	GAD1	DOWN	NA
537	6.74751e-89	-0.659031	0.032	0.26	2.26298e-84	SHISA9	DOWN	NA
538	8.83255e-89	-0.395747	0.177	0.502	2.96226e-84	ZNF274	DOWN	TF
539	9.9067e-89	-0.862107	0.614	0.843	3.32251e-84	PDE3A	DOWN	NA
540	1.24021e-88	-0.549715	0.447	0.783	4.15941e-84	FGFR1	DOWN	NA
541	1.49313e-88	-0.472735	0.221	0.549	5.00767e-84	SACM1L	DOWN	NA
542	1.57077e-88	-0.51559	0.681	0.942	5.26806e-84	BABAM2	DOWN	NA
543	1.87761e-88	-0.465312	0.124	0.417	6.29714e-84	CROT	DOWN	NA
544	2.06798e-88	-0.569738	0.032	0.257	6.93559e-84	MIR4435-2HG	DOWN	NA
545	2.5173e-88	-0.396481	0.269	0.628	8.44252e-84	MAPK1IP1L	DOWN	NA
546	2.71066e-88	-0.503681	0.279	0.627	9.09101e-84	SRBD1	DOWN	TF
547	5.77935e-88	-0.351229	0.157	0.477	1.93828e-83	NHLRC3	DOWN	NA
548	1.02703e-87	-0.50896	0.071	0.329	3.44446e-83	AC087477.2	DOWN	NA
549	1.31496e-87	-0.301145	0.005	0.203	4.4101e-83	SOX4	DOWN	TF
550	1.98927e-87	-0.381751	0.111	0.4	6.67161e-83	RNFT2	DOWN	NA
551	2.32791e-87	-0.415569	0.208	0.54	7.80733e-83	SAP30BP	DOWN	NA
552	4.20285e-87	-0.304824	0.069	0.334	1.40955e-82	RPS3A	DOWN	NA
553	8.35889e-87	-0.89575	0.051	0.289	2.8034e-82	COL4A1	DOWN	NA
554	9.19469e-87	-0.328621	0.087	0.361	3.08372e-82	TARS	DOWN	NA
555	1.22816e-86	-0.406546	0.313	0.686	4.119e-82	ZNF44	DOWN	TF
556	1.31196e-86	-0.361745	0.026	0.248	4.40005e-82	ITGA2	DOWN	NA
557	1.46023e-86	-0.341016	0.047	0.289	4.89732e-82	E2F5	DOWN	TF
558	1.49971e-86	-0.42707	0.071	0.331	5.02974e-82	RGMB	DOWN	NA
559	1.76964e-86	-0.335564	0.014	0.221	5.93503e-82	AC090692.1	DOWN	NA
560	2.54618e-86	-0.42054	0.021	0.235	8.53938e-82	SVIL	DOWN	NA
561	3.11735e-86	-0.390709	0.038	0.268	1.0455e-81	TSHR	DOWN	NA
562	3.19102e-86	-0.571536	0.225	0.554	1.0702e-81	EPB41L4A	DOWN	NA
563	4.37026e-86	-0.52588	0.877	0.988	1.4657e-81	RFX3	DOWN	TF
564	6.60969e-86	-0.624072	0.02	0.231	2.21676e-81	PCDH11X	DOWN	NA
565	1.05065e-85	-0.477839	0.504	0.841	3.52366e-81	GNB1	DOWN	NA
566	2.40806e-85	-0.399591	0.237	0.581	8.07616e-81	APLP2	DOWN	NA
567	2.79292e-85	-0.348238	0.153	0.466	9.36689e-81	NAPA	DOWN	NA
568	3.00317e-85	-0.783996	0.271	0.594	1.0072e-80	MDM2	DOWN	TF
569	4.4461e-85	-0.511691	0.909	0.991	1.49113e-80	APC	DOWN	NA
570	8.41073e-85	-0.26448	0.011	0.21	2.82079e-80	AC078842.2	DOWN	NA
571	9.06496e-85	-0.35605	0.095	0.369	3.04021e-80	SBNO2	DOWN	NA
572	1.08904e-84	-0.345335	0.164	0.48	3.65243e-80	ZFYVE26	DOWN	NA
573	1.26737e-84	-0.367506	0.308	0.682	4.25051e-80	NBPF1	DOWN	NA
574	1.27111e-84	-0.274277	0.009	0.206	4.26307e-80	F2R	DOWN	NA
575	1.27908e-84	-0.487476	0.132	0.422	4.28977e-80	SMAD9	DOWN	TF
576	1.28778e-84	-0.530976	0.457	0.803	4.31896e-80	COL11A1	DOWN	NA
577	1.49221e-84	-0.352117	0.013	0.214	5.00459e-80	VEPH1	DOWN	NA
578	2.10579e-84	-0.416755	0.144	0.436	7.06241e-80	CLCN5	DOWN	NA
579	2.45912e-84	-0.351538	0.017	0.222	8.24741e-80	EZH2	DOWN	TF
580	2.78252e-84	-0.384489	0.171	0.486	9.33202e-80	MSH2	DOWN	NA
581	3.09976e-84	-0.476457	0.454	0.798	1.0396e-79	USP32	DOWN	NA
582	3.98984e-84	-0.355272	0.053	0.291	1.33811e-79	ABCA5	DOWN	NA
583	5.74707e-84	-0.55081	0.088	0.344	1.92745e-79	ASNS	DOWN	NA
584	7.12228e-84	-0.342554	0.032	0.251	2.38867e-79	AC012409.2	DOWN	NA
585	8.01504e-84	-0.363183	0.178	0.5	2.68809e-79	MORF4L2	DOWN	NA
586	1.33594e-83	-0.309369	0.039	0.268	4.48047e-79	MIR9-3HG	DOWN	NA
587	1.74059e-83	-0.379272	0.178	0.491	5.83761e-79	METAP1D	DOWN	NA
588	1.78712e-83	-0.394696	0.253	0.596	5.99363e-79	LARS	DOWN	NA
589	1.86704e-83	-0.370438	0.133	0.431	6.26167e-79	SOAT1	DOWN	NA
590	2.05604e-83	-0.486548	0.166	0.462	6.89555e-79	TTC39C	DOWN	NA
591	2.10211e-83	-0.333147	0.169	0.49	7.05004e-79	SLC43A2	DOWN	NA
592	4.01524e-83	-0.372127	0.105	0.383	1.34663e-78	HSPA8	DOWN	NA
593	4.08767e-83	-0.341801	0.196	0.523	1.37092e-78	WASHC5	DOWN	NA
594	4.67768e-83	-0.552756	0.362	0.698	1.5688e-78	RASAL2	DOWN	NA
595	4.8002e-83	-0.440199	0.143	0.434	1.60989e-78	JAM3	DOWN	NA
596	5.08513e-83	-0.321603	0.087	0.358	1.70545e-78	RPL14	DOWN	NA
597	1.01337e-82	-0.405868	0.025	0.234	3.39865e-78	GNG2	DOWN	NA
598	1.1301e-82	-0.79296	0.058	0.294	3.79014e-78	SEMA5A	DOWN	NA
599	1.32187e-82	-0.499023	0.206	0.52	4.4333e-78	PKP4	DOWN	NA
600	1.6626e-82	-0.493572	0.45	0.788	5.57602e-78	MGA	DOWN	TF
601	1.67298e-82	-0.374674	0.397	0.769	5.61085e-78	ATP6V0A1	DOWN	NA
602	1.72139e-82	-0.303243	0.234	0.597	5.77319e-78	CNTNAP2	DOWN	NA
603	1.88256e-82	-0.300376	0.087	0.355	6.31373e-78	YBX1	DOWN	TF
604	2.6275e-82	-0.27467	0.069	0.326	8.81209e-78	RPLP0	DOWN	NA
605	2.9794e-82	-0.390902	0.244	0.58	9.9923e-78	FKTN	DOWN	NA
606	3.30063e-82	-0.591569	0.238	0.554	1.10697e-77	IFI16	DOWN	NA
607	3.65047e-82	-0.315845	0.17	0.49	1.2243e-77	DNM1	DOWN	NA
608	4.57309e-82	-0.412838	0.034	0.253	1.53372e-77	MIR34AHG	DOWN	NA
609	4.74163e-82	-0.372884	0.066	0.315	1.59025e-77	DPYSL5	DOWN	NA
610	4.76061e-82	-0.897112	0.108	0.367	1.59661e-77	HS6ST3	DOWN	NA
611	5.72606e-82	-0.444208	0.049	0.279	1.92041e-77	HECW2	DOWN	NA
612	5.78942e-82	-0.463685	0.077	0.332	1.94166e-77	KIAA1217	DOWN	NA
613	7.24484e-82	-0.481336	0.399	0.738	2.42978e-77	NBDY	DOWN	NA
614	1.05571e-81	-0.361389	0.112	0.393	3.54065e-77	NLRC5	DOWN	NA
615	1.45076e-81	-0.499489	0.642	0.893	4.86557e-77	FARS2	DOWN	NA
616	1.88984e-81	-0.379396	0.043	0.27	6.33814e-77	PTP4A1	DOWN	NA
617	1.95217e-81	-0.276583	0.079	0.343	6.54718e-77	RPSA	DOWN	NA
618	2.26333e-81	-0.327394	0.139	0.434	7.59075e-77	HMGXB3	DOWN	NA
619	5.1405e-81	-0.32921	0.066	0.313	1.72402e-76	RPL26	DOWN	NA
620	6.88518e-81	-0.34505	0.14	0.435	2.30915e-76	ADAM9	DOWN	NA
621	1.04061e-80	-0.575023	0.12	0.387	3.48998e-76	CA3	DOWN	NA
622	1.21512e-80	-0.426056	0.178	0.488	4.07527e-76	C11orf80	DOWN	NA
623	1.48205e-80	-0.371277	0.259	0.599	4.9705e-76	HNRNPR	DOWN	NA
624	1.92146e-80	-0.482962	0.049	0.279	6.44421e-76	SLC38A1	DOWN	NA
625	4.1484e-80	-0.387445	0.143	0.433	1.39129e-75	PARP14	DOWN	NA
626	4.98291e-80	-0.316434	0.046	0.272	1.67117e-75	AC024145.1	DOWN	NA
627	6.76503e-80	-0.291826	0.064	0.309	2.26886e-75	CPNE2	DOWN	NA
628	7.05622e-80	-0.334219	0.189	0.509	2.36652e-75	ZSCAN30	DOWN	TF
629	1.16745e-79	-0.579434	0.544	0.841	3.91541e-75	SUPT3H	DOWN	NA
630	1.35103e-79	-0.414752	0.082	0.334	4.53109e-75	ARX	DOWN	TF
631	1.37494e-79	-0.28051	0.108	0.386	4.61127e-75	TIMM44	DOWN	TF
632	1.84919e-79	-0.526615	0.508	0.814	6.2018e-75	HYDIN	DOWN	NA
633	2.67962e-79	-0.392232	0.361	0.711	8.9869e-75	PHYKPL	DOWN	NA
634	4.53932e-79	-0.540605	0.048	0.273	1.5224e-74	LINGO2	DOWN	NA
635	4.63388e-79	-0.373106	0.089	0.348	1.55411e-74	SRGAP2B	DOWN	NA
636	5.14522e-79	-0.345067	0.157	0.453	1.7256e-74	PTGFRN	DOWN	NA
637	6.30433e-79	-0.304472	0.091	0.351	2.11435e-74	RHBDL2	DOWN	NA
638	9.04783e-79	-0.458188	0.025	0.226	3.03446e-74	NFIL3	DOWN	TF
639	1.06043e-78	-0.371478	0.23	0.555	3.55649e-74	MPP5	DOWN	NA
640	1.09904e-78	-0.398263	0.358	0.713	3.68597e-74	PPIP5K2	DOWN	NA
641	1.12856e-78	-0.27557	0.027	0.235	3.78496e-74	DSEL	DOWN	NA
642	1.45149e-78	-0.381726	0.185	0.499	4.86799e-74	FDPS	DOWN	NA
643	1.99739e-78	-0.491128	0.254	0.568	6.69883e-74	B3GALT5	DOWN	NA
644	2.27582e-78	-0.326787	0.024	0.226	7.63264e-74	AC008467.1	DOWN	NA
645	3.19276e-78	-0.297896	0.047	0.273	1.07079e-73	C9orf84	DOWN	NA
646	5.32838e-78	-0.401199	0.41	0.762	1.78703e-73	CLTC	DOWN	NA
647	5.56637e-78	-0.523091	0.791	0.969	1.86685e-73	ATXN1	DOWN	NA
648	6.62243e-78	-0.292272	0.067	0.311	2.22103e-73	RPL18A	DOWN	NA
649	6.639e-78	-0.554596	0.685	0.92	2.22659e-73	RABGAP1L	DOWN	NA
650	8.33335e-78	-0.468077	0.467	0.801	2.79484e-73	NUBPL	DOWN	NA
651	8.4348e-78	-0.384352	0.367	0.72	2.82886e-73	HNRNPH1	DOWN	NA
652	8.70973e-78	-0.413058	0.327	0.668	2.92107e-73	TASP1	DOWN	NA
653	1.0452e-77	-0.426867	0.303	0.638	3.50539e-73	CKMT2-AS1	DOWN	NA
654	1.13105e-77	-0.40062	0.261	0.594	3.79331e-73	CSGALNACT2	DOWN	NA
655	1.51651e-77	-0.380958	0.261	0.597	5.08606e-73	METTL16	DOWN	NA
656	2.03874e-77	-0.261475	0.058	0.294	6.83752e-73	RPS5	DOWN	NA
657	2.33762e-77	-0.350764	0.179	0.482	7.83992e-73	CNOT6	DOWN	TF
658	3.08728e-77	-0.264913	0.032	0.242	1.03541e-72	AP001172.1	DOWN	NA
659	4.19987e-77	-0.374944	0.332	0.68	1.40855e-72	PCNX4	DOWN	NA
660	4.40284e-77	-0.389632	0.411	0.751	1.47662e-72	SLC16A1-AS1	DOWN	NA
661	4.52601e-77	-0.323471	0.25	0.591	1.51793e-72	LAMP1	DOWN	NA
662	4.77418e-77	-0.295808	0.136	0.427	1.60117e-72	RPL18	DOWN	NA
663	5.61037e-77	-0.364197	0.006	0.184	1.88161e-72	IGF2BP3	DOWN	NA
664	8.31497e-77	-0.483718	0.638	0.914	2.78867e-72	TLK1	DOWN	NA
665	8.8374e-77	-0.283595	0.139	0.434	2.96389e-72	RPLP1	DOWN	NA
666	1.05294e-76	-0.494152	0.246	0.563	3.53134e-72	PDLIM3	DOWN	NA
667	1.20205e-76	-0.462736	0.246	0.56	4.03144e-72	GLDC	DOWN	NA
668	1.65835e-76	-0.410561	0.366	0.708	5.56177e-72	PIKFYVE	DOWN	NA
669	1.66028e-76	-0.569969	0.056	0.279	5.56825e-72	AL445250.1	DOWN	NA
670	1.6749e-76	-0.597214	0.428	0.729	5.61728e-72	SCFD2	DOWN	NA
671	1.91035e-76	-0.342896	0.121	0.393	6.40694e-72	IPO9-AS1	DOWN	NA
672	2.19233e-76	-0.282766	0.058	0.29	7.35264e-72	ATP8B1	DOWN	NA
673	2.42101e-76	-0.290475	0.037	0.247	8.11959e-72	FILIP1L	DOWN	NA
674	3.87538e-76	-0.430645	0.361	0.7	1.29973e-71	CDC42SE2	DOWN	NA
675	4.19521e-76	-0.351085	0.24	0.569	1.40699e-71	WDR35	DOWN	NA
676	5.73438e-76	-0.348088	0.234	0.569	1.9232e-71	RPS24	DOWN	NA
677	6.97358e-76	-0.26953	0.077	0.321	2.3388e-71	NT5C	DOWN	NA
678	9.18374e-76	-0.341606	0.298	0.641	3.08004e-71	DHX9	DOWN	NA
679	9.77868e-76	-0.655211	0.034	0.236	3.27957e-71	TMEM132D	DOWN	NA
680	9.8989e-76	-0.369284	0.075	0.313	3.31989e-71	PLXNC1	DOWN	NA
681	1.12865e-75	-0.364654	0.249	0.58	3.78525e-71	FSD1L	DOWN	NA
682	1.63569e-75	-0.322876	0.034	0.239	5.48577e-71	SUSD1	DOWN	NA
683	1.96957e-75	-0.467195	0.468	0.806	6.60555e-71	APBA2	DOWN	NA
684	2.01062e-75	-0.619139	0.431	0.742	6.74322e-71	SNCAIP	DOWN	NA
685	2.03092e-75	-0.424272	0.646	0.925	6.8113e-71	DLG1	DOWN	NA
686	2.16691e-75	-0.459921	0.174	0.454	7.26738e-71	RAI14	DOWN	NA
687	2.36265e-75	-0.532356	0.371	0.687	7.92384e-71	EEA1	DOWN	NA
688	2.47334e-75	-0.594302	0.684	0.933	8.2951e-71	CNN3	DOWN	NA
689	2.58753e-75	-0.25166	0.042	0.257	8.67807e-71	AC009948.1	DOWN	NA
690	3.25152e-75	-0.293896	0.098	0.357	1.09049e-70	EIF2S2	DOWN	NA
691	3.60229e-75	-0.366455	0.177	0.471	1.20814e-70	PLEKHM1	DOWN	NA
692	4.41573e-75	-0.469947	0.189	0.48	1.48095e-70	CFAP47	DOWN	NA
693	5.20883e-75	-0.279314	0.01	0.189	1.74694e-70	ANGPTL2	DOWN	NA
694	7.71587e-75	-0.302371	0.034	0.241	2.58775e-70	RIMBP2	DOWN	NA
695	1.13009e-74	-0.507606	0.653	0.913	3.79009e-70	CCNY	DOWN	NA
696	1.32819e-74	-0.352808	0.133	0.409	4.45448e-70	USPL1	DOWN	NA
697	1.36572e-74	-0.563509	0.815	0.955	4.58035e-70	SPIRE1	DOWN	NA
698	1.57247e-74	-0.368637	0.329	0.677	5.27376e-70	DLG5	DOWN	NA
699	2.05837e-74	-0.343313	0.232	0.553	6.90334e-70	ELP3	DOWN	NA
700	2.50129e-74	-0.394475	0.264	0.589	8.38883e-70	HSPA9	DOWN	NA
701	2.56583e-74	-0.3421	0.203	0.512	8.60528e-70	C7orf50	DOWN	NA
702	3.05345e-74	-0.343403	0.219	0.531	1.02407e-69	SNX2	DOWN	NA
703	3.12949e-74	-0.468476	0.421	0.742	1.04957e-69	SIPA1L3	DOWN	NA
704	4.29409e-74	-0.346476	0.229	0.546	1.44015e-69	SEC11A	DOWN	NA
705	8.67192e-74	-0.259378	0.049	0.27	2.90839e-69	A2ML1-AS1	DOWN	NA
706	8.74819e-74	-0.459055	0.204	0.498	2.93397e-69	MCU	DOWN	NA
707	8.8001e-74	-0.293605	0.1	0.356	2.95138e-69	NPM1	DOWN	NA
708	9.03052e-74	-0.475695	0.04	0.243	3.02866e-69	DISC1	DOWN	NA
709	9.64176e-74	-0.349243	0.139	0.417	3.23365e-69	SMC5-AS1	DOWN	NA
710	9.93219e-74	-0.46044	0.422	0.747	3.33106e-69	PDSS2	DOWN	NA
711	1.04078e-73	-0.314844	0.056	0.276	3.49057e-69	FMO4	DOWN	NA
712	1.26144e-73	-0.453602	0.409	0.734	4.23062e-69	TBCA	DOWN	NA
713	1.36884e-73	-0.450771	0.107	0.357	4.59081e-69	AC114763.1	DOWN	NA
714	1.50602e-73	-0.580034	0.062	0.283	5.05087e-69	DOCK8	DOWN	NA
715	1.84419e-73	-0.296453	0.157	0.444	6.18504e-69	MLH1	DOWN	NA
716	2.54794e-73	-0.405284	0.32	0.654	8.54529e-69	ENOSF1	DOWN	NA
717	3.56979e-73	-0.349388	0.062	0.286	1.19723e-68	SQLE	DOWN	NA
718	4.64478e-73	-0.391572	0.306	0.635	1.55777e-68	DNAJC13	DOWN	NA
719	4.86851e-73	-0.350258	0.254	0.58	1.6328e-68	ADAM17	DOWN	NA
720	5.3226e-73	-0.386104	0.189	0.482	1.78509e-68	UHRF2	DOWN	NA
721	5.35844e-73	-0.410354	0.356	0.685	1.79711e-68	ETNK1	DOWN	NA
722	1.36251e-72	-0.311836	0.272	0.611	4.56959e-68	EIF2S3	DOWN	NA
723	1.49126e-72	-0.315752	0.216	0.53	5.00139e-68	DNAJC10	DOWN	NA
724	2.11795e-72	-0.504789	0.809	0.968	7.10317e-68	SSBP2	DOWN	NA
725	2.9316e-72	-0.40268	0.349	0.688	9.83201e-68	EVL	DOWN	NA
726	2.94073e-72	-0.369782	0.053	0.269	9.86261e-68	TENM1	DOWN	NA
727	3.41521e-72	-0.352113	0.161	0.443	1.14539e-67	HSPA4L	DOWN	NA
728	3.96645e-72	-0.262916	0.265	0.606	1.33027e-67	EXOC7	DOWN	NA
729	4.07516e-72	-0.44043	0.12	0.374	1.36673e-67	MMS22L	DOWN	NA
730	4.29944e-72	-0.511347	0.631	0.892	1.44194e-67	WDPCP	DOWN	NA
731	4.58e-72	-0.301533	0.121	0.384	1.53604e-67	ETF1	DOWN	NA
732	5.38844e-72	-0.400763	0.471	0.817	1.80718e-67	RNGTT	DOWN	NA
733	5.90028e-72	-0.399074	0.459	0.79	1.97884e-67	MICAL3	DOWN	NA
734	7.48773e-72	-0.738742	0.123	0.374	2.51124e-67	GEM	DOWN	NA
735	8.3982e-72	-0.360697	0.309	0.649	2.81659e-67	CCDC14	DOWN	NA
736	9.89912e-72	-0.453252	0.58	0.854	3.31997e-67	AVL9	DOWN	NA
737	1.45788e-71	-0.601718	0.729	0.914	4.88944e-67	PTPRM	DOWN	NA
738	2.08535e-71	-0.360544	0.364	0.712	6.99385e-67	AP2B1	DOWN	NA
739	3.20401e-71	-0.318918	0.006	0.171	1.07456e-66	EPHA3	DOWN	NA
740	4.16395e-71	-0.569905	0.006	0.17	1.39651e-66	LINC02055	DOWN	NA
741	4.45724e-71	-0.501666	0.533	0.843	1.49487e-66	CERS6	DOWN	TF
742	5.17716e-71	-1.01163	0.04	0.241	1.73631e-66	LHFPL3	DOWN	NA
743	7.22886e-71	-0.398608	0.451	0.78	2.42441e-66	VPS41	DOWN	NA
744	7.31211e-71	-0.483276	0.192	0.472	2.45233e-66	RAP2C-AS1	DOWN	NA
745	1.63229e-70	-0.394791	0.26	0.577	5.47437e-66	SPRY2	DOWN	NA
746	1.97661e-70	-0.317867	0.19	0.486	6.62915e-66	EIF4B	DOWN	NA
747	2.33552e-70	-0.314026	0.245	0.571	7.83285e-66	FKBP10	DOWN	NA
748	2.42447e-70	-0.592676	0.225	0.504	8.1312e-66	PDZD2	DOWN	NA
749	3.47445e-70	-0.283387	0.075	0.304	1.16526e-65	TEX10	DOWN	NA
750	4.37911e-70	-0.411605	0.318	0.637	1.46867e-65	MPC1	DOWN	NA
751	4.42962e-70	-0.309442	0.218	0.53	1.48561e-65	COMT	DOWN	NA
752	5.29711e-70	-0.323945	0.134	0.406	1.77655e-65	RPLP2	DOWN	NA
753	5.63467e-70	-0.318783	0.027	0.217	1.88975e-65	PLEKHG4B	DOWN	NA
754	6.12888e-70	-0.418162	0.067	0.288	2.0555e-65	MCTP1	DOWN	NA
755	7.35105e-70	-0.266584	0.101	0.352	2.4654e-65	AC020928.1	DOWN	NA
756	9.38685e-70	-0.511794	0.467	0.779	3.14816e-65	MKL2	DOWN	NA
757	1.23687e-69	-0.43776	0.996	1	4.14823e-65	QKI	DOWN	NA
758	1.42181e-69	-0.407201	0.182	0.468	4.76846e-65	SHC3	DOWN	NA
759	1.8432e-69	-0.355839	0.325	0.654	6.18173e-65	KLHL22	DOWN	NA
760	1.9164e-69	-0.422404	0.091	0.321	6.42721e-65	AZIN2	DOWN	NA
761	2.38166e-69	-0.336179	0.25	0.567	7.9876e-65	CCDC57	DOWN	NA
762	3.03485e-69	-0.274301	0.149	0.426	1.01783e-64	RPL5	DOWN	NA
763	3.36211e-69	-0.669504	0.933	0.989	1.12758e-64	DCLK2	DOWN	NA
764	3.37741e-69	-0.36364	0.316	0.641	1.13272e-64	LDAH	DOWN	NA
765	3.91192e-69	-0.446147	0.666	0.929	1.31198e-64	DYRK1A	DOWN	NA
766	4.14218e-69	-0.330777	0.035	0.229	1.3892e-64	HSPE1	DOWN	NA
767	4.58186e-69	-0.324825	0.146	0.414	1.53666e-64	LONP1	DOWN	NA
768	5.57743e-69	-0.639758	0.072	0.286	1.87056e-64	SPSB1	DOWN	NA
769	5.82491e-69	-0.425528	0.448	0.77	1.95356e-64	CASK	DOWN	NA
770	9.68765e-69	-0.258326	0.087	0.325	3.24904e-64	RPL27A	DOWN	NA
771	1.45953e-68	-0.70027	0.166	0.431	4.89496e-64	HMGCS1	DOWN	NA
772	1.61965e-68	-0.305974	0.27	0.593	5.43197e-64	RARS2	DOWN	NA
773	1.67518e-68	-0.281024	0.178	0.471	5.61822e-64	CTSA	DOWN	NA
774	1.79945e-68	-0.315819	0.122	0.374	6.035e-64	EIF2A	DOWN	NA
775	2.3158e-68	-0.342854	0.154	0.427	7.76674e-64	C16orf74	DOWN	NA
776	3.19536e-68	-0.3277	0.264	0.583	1.07166e-63	XPO6	DOWN	NA
777	3.26184e-68	-0.28563	0.207	0.509	1.09396e-63	PIGF	DOWN	NA
778	3.48105e-68	-0.274523	0.057	0.271	1.16747e-63	ARPP21	DOWN	NA
779	3.4811e-68	-0.43897	0.683	0.937	1.16749e-63	MAPT	DOWN	NA
780	3.5285e-68	-0.446133	0.285	0.591	1.18339e-63	HIP1	DOWN	NA
781	4.9848e-68	-0.267484	0.149	0.422	1.6718e-63	ZNF814	DOWN	TF
782	5.1933e-68	-0.475529	0.483	0.785	1.74173e-63	MAP3K13	DOWN	NA
783	5.40536e-68	-0.36002	0.389	0.724	1.81285e-63	PRKDC	DOWN	NA
784	5.60907e-68	-0.296195	0.092	0.331	1.88117e-63	FBXO16	DOWN	NA
785	6.14738e-68	-0.405157	0.237	0.526	2.06171e-63	ME3	DOWN	NA
786	7.39267e-68	-0.312866	0.048	0.25	2.47935e-63	CDKL2	DOWN	NA
787	8.77202e-68	-0.560012	0.592	0.841	2.94196e-63	GRAMD1B	DOWN	NA
788	9.04119e-68	-0.368983	0.448	0.794	3.03223e-63	NSF	DOWN	NA
789	9.20745e-68	-0.253992	0.028	0.215	3.088e-63	LINC00943	DOWN	NA
790	1.3168e-67	-0.283076	0.144	0.414	4.4163e-63	REEP5	DOWN	NA
791	1.44835e-67	-0.282573	0.048	0.251	4.85746e-63	RASGRP1	DOWN	NA
792	3.33786e-67	-0.263216	0.002	0.154	1.11945e-62	GRB14	DOWN	NA
793	4.35004e-67	-0.260285	0.074	0.297	1.45892e-62	SPDYE3	DOWN	NA
794	4.4786e-67	-0.523841	0.467	0.757	1.50203e-62	SMAD1	DOWN	TF
795	5.82851e-67	-0.253614	0.064	0.281	1.95477e-62	BLVRB	DOWN	NA
796	5.9596e-67	-0.269512	0.134	0.398	1.99873e-62	PPIP5K1	DOWN	NA
797	6.13722e-67	-0.329089	0.308	0.64	2.0583e-62	PHF20	DOWN	NA
798	6.59987e-67	-0.579703	0.053	0.253	2.21347e-62	NELL1	DOWN	NA
799	6.63634e-67	-0.304329	0.252	0.564	2.2257e-62	EPG5	DOWN	NA
800	6.8645e-67	-0.390812	0.313	0.628	2.30221e-62	EXOC6	DOWN	NA
801	6.9126e-67	-0.309057	0.19	0.479	2.31835e-62	AGK	DOWN	NA
802	7.44229e-67	-0.403792	0.735	0.963	2.496e-62	RALGAPA1	DOWN	NA
803	8.81033e-67	-0.423134	0.347	0.658	2.95481e-62	LCORL	DOWN	TF
804	9.52211e-67	-0.349435	0.402	0.737	3.19352e-62	TLK2	DOWN	NA
805	1.07822e-66	-0.344507	0.174	0.445	3.61612e-62	C12orf49	DOWN	NA
806	1.18694e-66	-0.493223	0.421	0.723	3.98076e-62	NR2F1	DOWN	TF
807	1.61048e-66	-0.295431	0.1	0.339	5.40124e-62	ZDHHC15	DOWN	TF
808	1.75538e-66	-0.312645	0.148	0.412	5.88719e-62	ZFYVE1	DOWN	NA
809	1.85427e-66	-0.579844	0.748	0.939	6.21885e-62	CHL1	DOWN	NA
810	2.13487e-66	-0.599854	0.293	0.567	7.15993e-62	PPM1E	DOWN	NA
811	2.59889e-66	-0.401955	0.108	0.346	8.71615e-62	DCDC1	DOWN	NA
812	2.75005e-66	-0.311186	0.183	0.463	9.22312e-62	PAWR	DOWN	NA
813	3.01529e-66	-0.642198	0.054	0.252	1.01127e-61	GALNT13	DOWN	NA
814	3.57197e-66	-0.390014	0.402	0.725	1.19797e-61	SLC16A9	DOWN	NA
815	3.93326e-66	-0.250752	0.008	0.166	1.31914e-61	ANXA1	DOWN	TF
816	4.93528e-66	-0.372821	0.269	0.571	1.65519e-61	CUEDC1	DOWN	NA
817	5.76575e-66	-0.309932	0.231	0.53	1.93372e-61	UBAP2L	DOWN	NA
818	1.00675e-65	-0.368527	0.256	0.552	3.37644e-61	N4BP1	DOWN	NA
819	1.05128e-65	-0.293125	0.249	0.561	3.5258e-61	CNOT1	DOWN	NA
820	1.0614e-65	-0.577728	0.198	0.47	3.55973e-61	DACH1	DOWN	NA
821	1.07431e-65	-0.409437	0.716	0.943	3.60301e-61	HIBCH	DOWN	NA
822	1.13448e-65	-0.315781	0.017	0.184	3.80482e-61	SEPHS2	DOWN	NA
823	1.24305e-65	-0.257007	0.091	0.326	4.16893e-61	PTRH2	DOWN	NA
824	1.33447e-65	-0.518875	0.298	0.586	4.47556e-61	ZFP36L2	DOWN	NA
825	1.45815e-65	-0.423813	0.141	0.391	4.89033e-61	MAMDC2-AS1	DOWN	NA
826	2.07356e-65	-0.255367	0.005	0.158	6.95431e-61	EPHA5-AS1	DOWN	NA
827	2.36296e-65	-0.489871	0.145	0.394	7.9249e-61	AL662796.1	DOWN	NA
828	2.59883e-65	-0.320867	0.238	0.538	8.71594e-61	FBXW8	DOWN	NA
829	2.99201e-65	-0.252546	0.089	0.321	1.00346e-60	RPL23	DOWN	NA
830	5.02837e-65	-0.392091	0.473	0.791	1.68642e-60	AC118549.1	DOWN	NA
831	5.29208e-65	-0.397183	0.402	0.723	1.77486e-60	AC009690.1	DOWN	NA
832	6.07368e-65	-0.368192	0.48	0.808	2.03699e-60	SNX13	DOWN	NA
833	1.86678e-64	-0.254057	0.052	0.251	6.26081e-60	JAKMIP2-AS1	DOWN	NA
834	1.90816e-64	-0.770452	0.103	0.329	6.39959e-60	MDGA2	DOWN	NA
835	2.05532e-64	-0.441589	0.684	0.93	6.89312e-60	C9orf3	DOWN	NA
836	2.31807e-64	-0.267757	0.028	0.204	7.77434e-60	NSUN7	DOWN	NA
837	2.58458e-64	-0.325951	0.068	0.275	8.66816e-60	GADD45A	DOWN	TF
838	2.7517e-64	-0.367562	0.208	0.492	9.22865e-60	NREP	DOWN	NA
839	2.85317e-64	-0.316109	0.167	0.43	9.56897e-60	CORO1C	DOWN	NA
840	3.16341e-64	-0.31309	0.342	0.675	1.06094e-59	SEC62	DOWN	NA
841	4.08266e-64	-0.276541	0.026	0.201	1.36924e-59	RPS6KA6	DOWN	NA
842	4.58244e-64	-0.363411	0.362	0.674	1.53686e-59	ZNF83	DOWN	TF
843	6.14351e-64	-0.251712	0.087	0.311	2.06041e-59	MORN4	DOWN	NA
844	6.37401e-64	-0.258707	0.085	0.311	2.13772e-59	INTS7	DOWN	NA
845	6.72915e-64	-0.412305	0.614	0.892	2.25682e-59	ZDHHC21	DOWN	NA
846	8.14549e-64	-0.328577	0.217	0.507	2.73183e-59	NARS2	DOWN	NA
847	1.04459e-63	-0.339193	0.312	0.623	3.50336e-59	CHM	DOWN	NA
848	1.08973e-63	-0.256817	0.139	0.398	3.65473e-59	SAE1	DOWN	NA
849	1.1619e-63	-0.344464	0.271	0.576	3.89679e-59	C2CD5	DOWN	NA
850	1.23704e-63	-0.276983	0.237	0.546	4.14877e-59	LRIG2	DOWN	NA
851	1.29243e-63	-0.430673	0.288	0.582	4.33454e-59	SPATA5	DOWN	NA
852	1.87729e-63	-0.277408	0.181	0.461	6.29606e-59	AC012404.1	DOWN	NA
853	3.16187e-63	-0.264085	0.124	0.371	1.06043e-58	HEATR1	DOWN	NA
854	4.15919e-63	-0.313449	0.26	0.562	1.39491e-58	MAPK6	DOWN	NA
855	4.22504e-63	-0.296112	0.208	0.503	1.41699e-58	PDIA3	DOWN	NA
856	7.24852e-63	-0.266915	0.193	0.478	2.43101e-58	MLEC	DOWN	NA
857	7.82977e-63	-0.35826	0.021	0.188	2.62595e-58	PLPPR1	DOWN	NA
858	8.00111e-63	-0.437544	0.314	0.607	2.68341e-58	CDYL	DOWN	NA
859	1.02835e-62	-0.426168	0.562	0.842	3.44887e-58	SPPL3	DOWN	NA
860	1.06126e-62	-0.393275	0.736	0.957	3.55926e-58	VPS13B	DOWN	NA
861	1.17744e-62	-0.295997	0.042	0.229	3.9489e-58	PLCL2	DOWN	NA
862	1.29165e-62	-0.37235	0.526	0.843	4.33194e-58	AFF4	DOWN	TF
863	1.43421e-62	-0.298265	0.199	0.481	4.81006e-58	PARP4	DOWN	NA
864	1.78321e-62	-0.555888	0.49	0.774	5.98053e-58	DPYSL3	DOWN	NA
865	1.94166e-62	-0.258605	0.056	0.254	6.51193e-58	TRAM2	DOWN	NA
866	2.67089e-62	-0.277073	0.2	0.484	8.95764e-58	ST13	DOWN	NA
867	2.76381e-62	-0.325226	0.227	0.512	9.26926e-58	TFB1M	DOWN	NA
868	2.83935e-62	-0.283758	0.316	0.634	9.52262e-58	H2AFY	DOWN	TF
869	3.17548e-62	-0.407514	0.34	0.651	1.06499e-57	TAF1	DOWN	TF
870	3.77742e-62	-0.310344	0.233	0.526	1.26687e-57	TMEM181	DOWN	NA
871	5.0007e-62	-0.342165	0.322	0.636	1.67713e-57	VMP1	DOWN	NA
872	5.46921e-62	-0.413625	0.647	0.904	1.83426e-57	ZNF532	DOWN	TF
873	5.97076e-62	-0.425834	0.192	0.454	2.00247e-57	AC090825.1	DOWN	NA
874	6.28804e-62	-0.408258	0.257	0.54	2.10888e-57	MBD2	DOWN	TF
875	6.67969e-62	-0.337882	0.279	0.581	2.24023e-57	EIF3H	DOWN	NA
876	8.481e-62	-0.302069	0.287	0.601	2.84436e-57	CC2D2A	DOWN	NA
877	9.98478e-62	-0.294402	0.222	0.513	3.3487e-57	TMEM67	DOWN	NA
878	1.02529e-61	-0.363563	0.496	0.818	3.43862e-57	VPS35L	DOWN	NA
879	1.02843e-61	-0.269199	0.147	0.405	3.44915e-57	GNS	DOWN	NA
880	1.15555e-61	-0.282972	0.142	0.394	3.87549e-57	NUP93	DOWN	NA
881	1.37647e-61	-0.327685	0.361	0.691	4.61639e-57	MTREX	DOWN	NA
882	1.47276e-61	-0.385393	0.027	0.196	4.93934e-57	LINC01122	DOWN	NA
883	1.62429e-61	-0.293241	0.155	0.414	5.44756e-57	WDR43	DOWN	NA
884	1.67924e-61	-0.412958	0.654	0.918	5.63184e-57	NBEA	DOWN	NA
885	1.87298e-61	-0.362034	0.246	0.529	6.28161e-57	AC093157.1	DOWN	NA
886	1.90351e-61	-0.26602	0.191	0.471	6.38399e-57	ACTN4	DOWN	NA
887	2.2814e-61	-0.266181	0.069	0.277	7.65137e-57	FRMD4B	DOWN	NA
888	2.39311e-61	-0.432631	0.411	0.707	8.02602e-57	CSRNP3	DOWN	NA
889	2.41707e-61	-0.289846	0.221	0.506	8.10637e-57	HSD17B14	DOWN	NA
890	2.71356e-61	-0.30935	0.063	0.262	9.10073e-57	DYRK3	DOWN	NA
891	2.72733e-61	-0.30244	0.225	0.513	9.14693e-57	OSTM1	DOWN	NA
892	3.26317e-61	-0.376736	0.215	0.483	1.0944e-56	PRKAA2	DOWN	TF
893	3.46635e-61	-0.259948	0.16	0.422	1.16254e-56	NOP58	DOWN	NA
894	4.45591e-61	-0.293147	0.056	0.251	1.49442e-56	FRMPD3	DOWN	NA
895	5.06263e-61	-0.294742	0.133	0.378	1.6979e-56	PAXIP1	DOWN	TF
896	5.20232e-61	-0.291113	0.021	0.183	1.74475e-56	LRRC9	DOWN	NA
897	5.80126e-61	-0.262913	0.078	0.291	1.94563e-56	GRIA3	DOWN	NA
898	6.51719e-61	-0.716647	0.049	0.232	2.18574e-56	TSHZ2	DOWN	NA
899	8.07639e-61	-0.380057	0.88	0.992	2.70866e-56	RERE	DOWN	NA
900	1.03897e-60	-0.304868	0.337	0.66	3.48449e-56	MYEF2	DOWN	TF
901	1.07833e-60	-0.516622	0.697	0.912	3.6165e-56	UTRN	DOWN	NA
902	1.56514e-60	-0.495185	0.579	0.84	5.24917e-56	TSPAN5	DOWN	NA
903	1.80923e-60	-0.342665	0.197	0.465	6.0678e-56	NDUFAF2	DOWN	NA
904	2.11651e-60	-0.268353	0.317	0.643	7.09834e-56	THRAP3	DOWN	NA
905	2.40034e-60	-0.369269	0.613	0.896	8.05026e-56	PKN2	DOWN	NA
906	2.70821e-60	-0.331697	0.076	0.283	9.08281e-56	WNT5B	DOWN	NA
907	3.09991e-60	-0.330812	0.132	0.369	1.03965e-55	AVIL	DOWN	NA
908	3.1325e-60	-0.327444	0.214	0.488	1.05058e-55	PCDH9-AS2	DOWN	NA
909	3.89575e-60	-0.298983	0.286	0.593	1.30656e-55	ZBTB37	DOWN	TF
910	4.61852e-60	-0.281052	0.006	0.148	1.54896e-55	ARNTL2	DOWN	TF
911	4.9473e-60	-0.264284	0.26	0.562	1.65923e-55	NBPF11	DOWN	NA
912	6.54411e-60	-0.298112	0.023	0.187	2.19477e-55	NXPH1	DOWN	NA
913	7.23269e-60	-0.2894	0.155	0.409	2.4257e-55	HES4	DOWN	TF
914	7.55447e-60	-0.496846	0.673	0.937	2.53362e-55	CNTNAP3B	DOWN	NA
915	8.83132e-60	-0.280616	0.013	0.164	2.96185e-55	DACT1	DOWN	NA
916	9.49061e-60	-0.258119	0.179	0.449	3.18296e-55	CGGBP1	DOWN	NA
917	1.01231e-59	-0.273086	0.095	0.315	3.39508e-55	CCDC18	DOWN	NA
918	1.04742e-59	-0.364416	0.408	0.723	3.51283e-55	COA1	DOWN	NA
919	1.10415e-59	-0.265658	0.131	0.375	3.7031e-55	TMED5	DOWN	NA
920	1.28747e-59	-0.251969	0.222	0.509	4.31793e-55	HNRNPH3	DOWN	TF
921	1.84396e-59	-0.270886	0.213	0.491	6.18428e-55	CCDC130	DOWN	NA
922	2.2979e-59	-0.374044	0.534	0.841	7.70671e-55	ANKIB1	DOWN	NA
923	2.42871e-59	-0.287519	0.001	0.134	8.1454e-55	CDH6	DOWN	NA
924	3.36625e-59	-0.27002	0.192	0.462	1.12897e-54	DYNC1I2	DOWN	NA
925	4.43096e-59	-0.310529	0.267	0.563	1.48605e-54	ACTR3	DOWN	NA
926	4.70518e-59	-0.307379	0.29	0.593	1.57802e-54	YWHAZ	DOWN	TF
927	9.80456e-59	-0.328595	0.155	0.412	3.28825e-54	RPL32	DOWN	NA
928	9.91488e-59	-0.305891	0.055	0.24	3.32525e-54	ARHGEF2	DOWN	NA
929	1.14519e-58	-0.364408	0.146	0.388	3.84075e-54	KLF6	DOWN	TF
930	1.19583e-58	-0.326596	0.257	0.544	4.01059e-54	EIF2AK2	DOWN	NA
931	2.06033e-58	-0.687306	0.124	0.348	6.90992e-54	CNTN5	DOWN	NA
932	2.16871e-58	-0.336917	0.326	0.632	7.27343e-54	WDR27	DOWN	NA
933	2.28833e-58	-0.255724	0.213	0.497	7.67461e-54	PPWD1	DOWN	NA
934	3.40063e-58	-0.28168	0.284	0.587	1.1405e-53	ORC3	DOWN	NA
935	3.56884e-58	-0.321487	0.349	0.663	1.19692e-53	TYW1	DOWN	NA
936	3.7225e-58	-0.570714	0.601	0.822	1.24845e-53	NEDD4L	DOWN	NA
937	4.61721e-58	-0.30027	0.002	0.134	1.54852e-53	LINC02253	DOWN	NA
938	4.69919e-58	-0.439756	0.018	0.169	1.57601e-53	PCDH11Y	DOWN	NA
939	4.70266e-58	-0.333591	0.583	0.88	1.57718e-53	HNRNPA2B1	DOWN	NA
940	5.07914e-58	-0.318769	0.263	0.551	1.70344e-53	MRPS25	DOWN	TF
941	5.2374e-58	-0.372228	0.143	0.38	1.75652e-53	UBASH3B	DOWN	NA
942	5.28319e-58	-0.411235	0.432	0.73	1.77188e-53	ANO6	DOWN	NA
943	5.46991e-58	-0.398111	0.252	0.524	1.8345e-53	PLSCR1	DOWN	NA
944	7.5207e-58	-0.789329	0.153	0.375	2.52229e-53	COL4A2	DOWN	NA
945	9.21526e-58	-0.327182	0.33	0.636	3.09061e-53	NFX1	DOWN	NA
946	9.41881e-58	-0.455254	0.161	0.392	3.15888e-53	CRY1	DOWN	NA
947	1.01122e-57	-0.321292	0.147	0.389	3.39142e-53	LRIG3	DOWN	NA
948	1.06415e-57	-0.546042	0.054	0.238	3.56896e-53	SEZ6L	DOWN	NA
949	1.39046e-57	-0.279387	0.311	0.626	4.66333e-53	TSC1	DOWN	NA
950	1.59555e-57	-0.272173	0.163	0.413	5.35117e-53	ERICH1	DOWN	NA
951	2.4287e-57	-0.329819	0.258	0.542	8.14537e-53	DGKD	DOWN	NA
952	2.43122e-57	-0.323293	0.237	0.511	8.15384e-53	FAM49B	DOWN	NA
953	2.723e-57	-0.370438	0.164	0.409	9.1324e-53	KIAA1549L	DOWN	NA
954	3.21696e-57	-0.37003	0.391	0.689	1.0789e-52	PKD2	DOWN	NA
955	3.252e-57	-0.335666	0.241	0.518	1.09066e-52	CRLS1	DOWN	NA
956	3.43642e-57	-0.4343	0.873	0.987	1.15251e-52	MAP4K4	DOWN	NA
957	3.60028e-57	-0.282986	0.172	0.424	1.20746e-52	EFL1	DOWN	NA
958	4.082e-57	-0.401398	0.253	0.531	1.36902e-52	ACTN1	DOWN	NA
959	4.10632e-57	-0.340621	0.117	0.341	1.37718e-52	OSBPL3	DOWN	NA
960	4.60498e-57	-0.336116	0.298	0.588	1.54442e-52	CHD1	DOWN	TF
961	6.00217e-57	-0.586855	0.258	0.505	2.01301e-52	KCTD16	DOWN	NA
962	6.02714e-57	-0.290708	0.326	0.634	2.02138e-52	RNF111	DOWN	NA
963	6.6703e-57	-0.338206	0.503	0.823	2.23708e-52	THADA	DOWN	NA
964	7.09746e-57	-0.277909	0.251	0.542	2.38035e-52	IP6K1	DOWN	NA
965	7.39333e-57	-0.322174	0.419	0.732	2.47957e-52	TBCD	DOWN	NA
966	1.09022e-56	-0.251307	0.135	0.377	3.65637e-52	LDLR	DOWN	NA
967	1.24991e-56	-0.289286	0.142	0.375	4.19196e-52	CCDC88C	DOWN	NA
968	2.57392e-56	-0.343803	0.587	0.875	8.63242e-52	PRRC2B	DOWN	NA
969	3.38698e-56	-0.315601	0.061	0.247	1.13592e-51	EGF	DOWN	NA
970	3.42759e-56	-0.295639	0.075	0.271	1.14955e-51	SYTL2	DOWN	NA
971	3.7263e-56	-0.469371	0.68	0.884	1.24973e-51	DMD	DOWN	NA
972	4.41e-56	-0.414405	0.477	0.754	1.47903e-51	SLC22A23	DOWN	NA
973	4.87945e-56	-0.329231	0.334	0.637	1.63647e-51	AC239809.3	DOWN	NA
974	5.8079e-56	-0.387717	0.3	0.608	1.94785e-51	RPL37A	DOWN	NA
975	6.30467e-56	-0.267833	0.188	0.448	2.11446e-51	GLMN	DOWN	NA
976	7.88479e-56	-1.40514	0.231	0.459	2.6444e-51	CHI3L1	DOWN	NA
977	8.9501e-56	-0.314083	0.444	0.749	3.00169e-51	NCOA6	DOWN	NA
978	9.15264e-56	-0.252489	0.219	0.497	3.06961e-51	GTF2H1	DOWN	NA
979	1.12769e-55	-0.346211	0.408	0.712	3.78204e-51	ARFGEF2	DOWN	NA
980	1.14855e-55	-0.266968	0.242	0.53	3.85202e-51	SRP54	DOWN	NA
981	1.22085e-55	-0.362673	0.26	0.535	4.09449e-51	LAMC1	DOWN	NA
982	1.50206e-55	-0.255725	0.17	0.421	5.03761e-51	EDRF1	DOWN	NA
983	1.53154e-55	-0.256583	0.137	0.374	5.13648e-51	SLC9B2	DOWN	NA
984	1.7404e-55	-0.341451	0.448	0.757	5.83696e-51	UPF3A	DOWN	NA
985	1.92428e-55	-0.377325	0.243	0.505	6.45364e-51	LRRN1	DOWN	NA
986	2.00878e-55	-0.611974	0.005	0.135	6.73704e-51	AC069277.1	DOWN	NA
987	2.28841e-55	-0.468467	0.39	0.665	7.67486e-51	DPY19L1	DOWN	NA
988	2.563e-55	-0.306019	0.25	0.526	8.59577e-51	IDH1	DOWN	NA
989	3.02837e-55	-0.375653	0.599	0.877	1.01566e-50	TAF15	DOWN	NA
990	5.61966e-55	-0.32752	0.501	0.808	1.88472e-50	VEZT	DOWN	NA
991	5.78503e-55	-0.400227	0.313	0.593	1.94018e-50	ABHD3	DOWN	NA
992	6.07477e-55	-0.48494	0.377	0.643	2.03736e-50	CMSS1	DOWN	NA
993	6.39523e-55	-0.335713	0.409	0.725	2.14483e-50	VPS54	DOWN	NA
994	6.87611e-55	-0.307293	0.251	0.522	2.30611e-50	SMARCA1	DOWN	TF
995	8.0002e-55	-0.327151	0.456	0.769	2.68311e-50	ATF7IP	DOWN	NA
996	8.76171e-55	-0.339563	0.106	0.314	2.9385e-50	RGS22	DOWN	NA
997	9.17337e-55	-0.453737	0.456	0.73	3.07656e-50	GTDC1	DOWN	NA
998	1.02554e-54	-0.263014	0.178	0.431	3.43945e-50	IFNAR1	DOWN	NA
999	1.05288e-54	-0.387032	0.68	0.923	3.53114e-50	RTN4	DOWN	NA
1000	1.3764e-54	-0.335834	0.046	0.217	4.61617e-50	SRPX	DOWN	NA
1001	1.52785e-54	-0.257645	0.238	0.519	5.1241e-50	DENR	DOWN	NA
1002	2.69292e-54	-0.298379	0.395	0.712	9.03152e-50	GPR173	DOWN	NA
1003	2.7781e-54	-0.271397	0.01	0.145	9.3172e-50	NNAT	DOWN	NA
1004	3.00292e-54	-0.273551	0.149	0.383	1.00712e-49	PMM2	DOWN	NA
1005	3.03384e-54	-0.306552	0.186	0.437	1.01749e-49	GNB4	DOWN	NA
1006	3.24897e-54	-0.260404	0.125	0.349	1.08964e-49	UTP20	DOWN	NA
1007	3.34111e-54	-0.301524	0.034	0.194	1.12054e-49	JPH1	DOWN	NA
1008	3.75883e-54	-0.251988	0.33	0.64	1.26064e-49	TAF1D	DOWN	NA
1009	4.17752e-54	-0.389887	0.594	0.867	1.40106e-49	ZEB2	DOWN	TF
1010	4.84879e-54	-0.321489	0.123	0.343	1.62619e-49	FRG1-DT	DOWN	NA
1011	6.96008e-54	-0.338604	0.445	0.744	2.33427e-49	SMARCC1	DOWN	TF
1012	7.0488e-54	-0.307431	0.416	0.731	2.36403e-49	PIP5K1A	DOWN	NA
1013	7.35291e-54	-0.250593	0.177	0.429	2.46602e-49	RAPH1	DOWN	NA
1014	8.74949e-54	-0.273679	0.169	0.412	2.93441e-49	TVP23A	DOWN	NA
1015	9.36978e-54	-0.254271	0.322	0.633	3.14244e-49	SPG7	DOWN	NA
1016	9.59719e-54	-0.33087	0.413	0.724	3.21871e-49	TTLL5	DOWN	NA
1017	9.7028e-54	-0.301873	0.157	0.401	3.25413e-49	RPS25	DOWN	NA
1018	1.06019e-53	-0.3448	0.373	0.682	3.55565e-49	DENND2A	DOWN	NA
1019	1.07014e-53	-0.308318	0.363	0.668	3.58903e-49	LARP4	DOWN	TF
1020	1.27059e-53	-0.264108	0.325	0.628	4.26131e-49	C11orf58	DOWN	NA
1021	1.27939e-53	-0.277038	0.042	0.208	4.29083e-49	NEK10	DOWN	NA
1022	1.32142e-53	-0.305702	0.247	0.517	4.43177e-49	MANBA	DOWN	NA
1023	1.33596e-53	-0.304929	0.152	0.38	4.48056e-49	RORA-AS1	DOWN	NA
1024	1.4815e-53	-0.292063	0.203	0.457	4.96864e-49	VPS37B	DOWN	NA
1025	1.54733e-53	-0.35525	0.293	0.568	5.18945e-49	BCL2L13	DOWN	NA
1026	1.65902e-53	-0.305347	0.377	0.684	5.56401e-49	VPS50	DOWN	NA
1027	2.08247e-53	-0.336344	0.324	0.62	6.98419e-49	MAP3K14	DOWN	NA
1028	2.20053e-53	-0.314695	0.467	0.783	7.38013e-49	HUWE1	DOWN	NA
1029	2.41185e-53	-0.276995	0.406	0.72	8.08886e-49	BDP1	DOWN	TF
1030	3.43714e-53	-0.255584	0.097	0.303	1.15275e-48	SEMA6A-AS1	DOWN	NA
1031	4.32374e-53	-0.299053	0.092	0.292	1.4501e-48	HERPUD1	DOWN	NA
1032	5.39422e-53	-0.263532	0.215	0.477	1.80911e-48	TBC1D22B	DOWN	NA
1033	1.03104e-52	-0.252628	0.191	0.448	3.4579e-48	LMNA	DOWN	NA
1034	1.56847e-52	-0.306263	0.341	0.639	5.26034e-48	KCTD3	DOWN	NA
1035	1.96551e-52	-0.276788	0.179	0.424	6.59194e-48	WDR25	DOWN	NA
1036	2.2961e-52	-0.259256	0.179	0.423	7.70066e-48	FANCL	DOWN	NA
1037	2.41787e-52	-0.266107	0.22	0.49	8.10906e-48	ZFX	DOWN	TF
1038	2.7812e-52	-0.366535	0.421	0.706	9.32758e-48	LPIN2	DOWN	NA
1039	2.90474e-52	-0.773575	0.035	0.189	9.74191e-48	SLIT3	DOWN	NA
1040	3.08427e-52	-0.404908	0.412	0.674	1.0344e-47	STRBP	DOWN	NA
1041	3.47609e-52	-0.585121	0.205	0.433	1.16581e-47	AC104123.1	DOWN	NA
1042	4.10524e-52	-0.260742	0.063	0.243	1.37682e-47	KIAA1549	DOWN	NA
1043	4.15609e-52	-0.314066	0.49	0.794	1.39387e-47	ZC2HC1A	DOWN	NA
1044	4.46145e-52	-0.266887	0.211	0.467	1.49628e-47	DTWD1	DOWN	NA
1045	4.63063e-52	-0.252553	0.03	0.182	1.55302e-47	PTPRO	DOWN	NA
1046	4.65735e-52	-0.282441	0.3	0.59	1.56198e-47	ANKRD36B	DOWN	NA
1047	6.03281e-52	-0.32726	0.488	0.784	2.02328e-47	RGS12	DOWN	NA
1048	6.97499e-52	-0.28276	0.45	0.76	2.33927e-47	RBMX	DOWN	NA
1049	9.07526e-52	-0.282726	0.363	0.669	3.04366e-47	CABIN1	DOWN	NA
1050	9.51778e-52	-0.381941	0.292	0.558	3.19207e-47	CREM	DOWN	TF
1051	1.00854e-51	-0.272277	0.021	0.163	3.38246e-47	AIM2	DOWN	NA
1052	1.03633e-51	-0.279448	0.404	0.709	3.47564e-47	BRD4	DOWN	NA
1053	1.08334e-51	-0.310924	0.284	0.555	3.63329e-47	PSMD14	DOWN	NA
1054	1.24599e-51	-0.555047	0.325	0.58	4.17881e-47	PKNOX2	DOWN	TF
1055	1.45574e-51	-0.312911	0.069	0.249	4.88225e-47	MTSS1	DOWN	NA
1056	1.75943e-51	-0.281815	0.181	0.423	5.90077e-47	COPG2	DOWN	NA
1057	1.93053e-51	-0.410319	0.191	0.426	6.47461e-47	WIPF1	DOWN	NA
1058	1.97825e-51	-0.38347	0.817	0.968	6.63466e-47	TBC1D5	DOWN	NA
1059	2.07011e-51	-0.345651	0.458	0.75	6.94272e-47	UVRAG	DOWN	NA
1060	2.61357e-51	-0.276805	0.236	0.502	8.76539e-47	PHTF2	DOWN	NA
1061	3.50098e-51	-0.279821	0.257	0.53	1.17416e-46	SECISBP2	DOWN	NA
1062	3.76132e-51	-0.296455	0.465	0.77	1.26147e-46	FAM13B	DOWN	NA
1063	4.64489e-51	-0.286554	0.164	0.397	1.5578e-46	RALA	DOWN	NA
1064	4.71547e-51	-0.261711	0.268	0.545	1.58148e-46	GNPTAB	DOWN	NA
1065	4.86622e-51	-0.34862	0.392	0.672	1.63203e-46	OSBPL8	DOWN	NA
1066	4.95995e-51	-0.265994	0.319	0.617	1.66347e-46	INO80	DOWN	NA
1067	6.43347e-51	-0.357916	0.749	0.957	2.15766e-46	ANKRD17	DOWN	NA
1068	1.02995e-50	-0.313875	0.454	0.759	3.45424e-46	GATAD2B	DOWN	NA
1069	1.26174e-50	-0.372966	0.091	0.279	4.23163e-46	CNKSR3	DOWN	NA
1070	1.68226e-50	-0.256967	0.26	0.54	5.64197e-46	RAB11A	DOWN	NA
1071	2.14095e-50	-0.397948	0.672	0.898	7.18031e-46	ELP4	DOWN	NA
1072	2.19007e-50	-0.426923	0.9	0.982	7.34506e-46	TRIM9	DOWN	NA
1073	2.49462e-50	-0.278548	0.094	0.287	8.36645e-46	DNAH6	DOWN	NA
1074	2.877e-50	-0.268693	0.188	0.426	9.64889e-46	LONRF1	DOWN	NA
1075	3.52456e-50	-0.32721	0.321	0.595	1.18207e-45	ZNF106	DOWN	NA
1076	3.6049e-50	-0.33135	0.068	0.246	1.20901e-45	KHDRBS3	DOWN	NA
1077	5.08971e-50	-0.385451	0.22	0.466	1.70699e-45	PTPRN2	DOWN	NA
1078	5.48176e-50	-0.257003	0.222	0.476	1.83847e-45	ALS2	DOWN	NA
1079	6.19079e-50	-0.290569	0.14	0.361	2.07627e-45	HAP1	DOWN	NA
1080	6.3474e-50	-0.589398	0.142	0.347	2.12879e-45	MAML3	DOWN	NA
1081	7.13431e-50	-0.286019	0.055	0.222	2.39271e-45	DBX2	DOWN	TF
1082	7.78604e-50	-0.347459	0.265	0.527	2.61128e-45	PPP1CB	DOWN	NA
1083	8.10269e-50	-0.388036	0.315	0.603	2.71748e-45	HSPA1A	DOWN	NA
1084	8.72741e-50	-0.274261	0.178	0.411	2.927e-45	WHRN	DOWN	NA
1085	1.0934e-49	-0.278019	0.333	0.621	3.66703e-45	SLC10A7	DOWN	NA
1086	1.14533e-49	-0.252431	0.359	0.662	3.84119e-45	PARG	DOWN	NA
1087	1.31886e-49	-0.303136	0.277	0.546	4.4232e-45	TANGO6	DOWN	NA
1088	1.3337e-49	-0.255637	0.188	0.427	4.47296e-45	FARSB	DOWN	NA
1089	1.39813e-49	-0.276449	0.296	0.572	4.68903e-45	KIAA0586	DOWN	NA
1090	1.60953e-49	-0.309593	0.071	0.249	5.39806e-45	GUCY1A2	DOWN	NA
1091	1.67873e-49	-0.298825	0.357	0.643	5.63011e-45	STAT5B	DOWN	TF
[truncated: 1,416 more rows]

## Sheet: Fig5F qNSC1 downregulated GOs
GO terms of down-regulated genes from qNSC1 during aging
[truncated: 5,371 more rows]

[truncated: 10 more sheets: Fig5F qNSC2 upregulated genes, Fig5F qNSC2 upregulated GOs, Fig5F qNSC2 downregulated genes, Fig5F qNSC2 downregulated GOs, FigS8B, FigS8C, FigS8E, FigS8F, FigS8H, FigS8I]
