# Supplementary material for: Deciphering molecular heterogeneity and dynamics of human hippocampal neural stem cells at different ages and injury states
Source: eLife. 2024 Apr 12;12:RP89507. doi: 10.7554/eLife.89507 (PMC11014727; doi:10.7554/eLife.89507)
Supplement: Figure 6—source data 1. [file elife-89507-fig6-data1.xlsx]

## Sheet: Fig6F Cluster1 gene &GO terms
Genes and enriched GO terms of Cluster 1 from injury neurogenic lineage trajectory
ID	Description	GeneRatio	BgRatio	pvalue	p.adjust	qvalue	geneID	Count
GO:0031589	cell-substrate adhesion	10/96	184/16374	1.22942e-07	0.000184905	0.000126566	FN1/FERMT2/DLC1/BCL6/DOCK1/KANK1/PREX1/BCL2/PTN/TESK2	10
GO:0048870	cell motility	12/96	427/16374	7.31624e-06	0.00373271	0.002555	FOXO3/SGK3/CTNNA1/DLC1/CLIC4/ERBB4/DST/KANK1/ITGB4/PREX1/BCL2/PTN	12
GO:0060070	canonical Wnt signaling pathway	10/96	295/16374	8.89954e-06	0.00373271	0.002555	FOXO3/YAP1/SOX2/GPRC5B/STK3/DAAM2/TCF7L2/KANK1/LRP4/FGFR2	10
GO:0034446	substrate adhesion-dependent cell spreading	6/96	86/16374	1.1177e-05	0.00373271	0.002555	FN1/FERMT2/DOCK1/KANK1/PREX1/MICALL2	6
GO:0031175	neuron projection development	12/96	456/16374	1.41464e-05	0.00373271	0.002555	MDM2/LPAR1/EFHD1/PREX2/KANK1/PREX1/BCL2/MICALL2/PTN/GRID2/LRP4/FGFR2	12
GO:0009611	response to wounding	10/96	313/16374	1.48911e-05	0.00373271	0.002555	FN1/TNC/SOX2/GSN/DOCK1/SLC1A3/DST/KANK1/ITGB4/PTN	10
GO:0016055	Wnt signaling pathway	11/96	410/16374	2.77176e-05	0.00526783	0.00360578	FOXO3/YAP1/FERMT2/SOX2/GPRC5B/STK3/DAAM2/TCF7L2/KANK1/LRP4/FGFR2	11
GO:0007528	neuromuscular junction development	4/96	31/16374	3.09193e-05	0.00526783	0.00360578	TNC/COL4A5/PTN/LRP4	4
GO:0030336	negative regulation of cell migration	6/96	105/16374	3.49884e-05	0.00526783	0.00360578	FOXO3/DLC1/CLIC4/KANK1/BCL2/PTN	6
GO:0007160	cell-matrix adhesion	7/96	155/16374	3.50255e-05	0.00526783	0.00360578	FERMT2/CD44/DLC1/BCL6/ITGB4/BCL2/TESK2	7
GO:0000904	cell morphogenesis involved in differentiation	7/96	167/16374	5.63215e-05	0.00709375	0.00485561	DOCK1/PREX2/KANK1/PREX1/BCL2/LRP4/FGFR2	7
GO:0150063	visual system development	4/96	36/16374	5.65991e-05	0.00709375	0.00485561	SOX2/SH3PXD2B/BMPR1B/MEIS2	4
GO:0030036	actin cytoskeleton organization	8/96	233/16374	6.73732e-05	0.00755137	0.00516884	GSN/CTNNA1/DLC1/BCL6/DAAM2/KANK1/BCL2/TESK2	8
GO:0048880	sensory system development	4/96	38/16374	7.0292e-05	0.00755137	0.00516884	SOX2/SH3PXD2B/BMPR1B/MEIS2	4
GO:0097191	extrinsic apoptotic signaling pathway	7/96	175/16374	7.56821e-05	0.0075884	0.00519418	YAP1/SGK3/STK3/CTNNA1/TCF7L2/BMPR1B/BCL2	7
GO:1990000	amyloid fibril formation	3/96	15/16374	8.44358e-05	0.00793697	0.00543278	MDM2/GSN/CLU	3
GO:0007265	Ras protein signal transduction	8/96	246/16374	9.83934e-05	0.0084946	0.00581447	SQSTM1/LPAR1/DLC1/BCL6/PREX2/KANK1/PREX1/ITPKB	8
GO:1904395	positive regulation of skeletal muscle acetylcholine-gated channel clustering	2/96	3/16374	0.000101664	0.0084946	0.00581447	PTN/LRP4	2
GO:1990785	response to water-immersion restraint stress	2/96	4/16374	0.00020255	0.0160334	0.0109747	FOXO3/MDM2	2
GO:0007229	integrin-mediated signaling pathway	5/96	94/16374	0.000226767	0.0169821	0.0116241	FERMT2/CTNNA1/DOCK1/DST/PTN	5
GO:0035024	negative regulation of Rho protein signal transduction	3/96	21/16374	0.000240591	0.0169821	0.0116241	DLC1/BCL6/KANK1	3
GO:0003006	developmental process involved in reproduction	7/96	212/16374	0.000248408	0.0169821	0.0116241	TNC/STK3/QKI/BMPR1B/BCL2/PTN/FGFR2	7
GO:0007010	cytoskeleton organization	8/96	284/16374	0.000263013	0.0171987	0.0117724	PHLDB1/SEMA6A/CTNNA1/DLC1/DOCK1/CLIC4/DST/BCL2	8
GO:0060173	limb development	4/96	55/16374	0.000300965	0.0188605	0.0129098	KAT2B/BMPR1B/ITGB4/LRP4	4
GO:0061026	cardiac muscle tissue regeneration	2/96	5/16374	0.000336293	0.0199108	0.0136287	YAP1/ERBB4	2
GO:0007266	Rho protein signal transduction	6/96	159/16374	0.000344202	0.0199108	0.0136287	LPAR1/DLC1/BCL6/PREX2/KANK1/PREX1	6
GO:0043113	receptor clustering	3/96	25/16374	0.000409047	0.0219717	0.0150394	GSN/PTN/LRP4	3
GO:0060045	positive regulation of cardiac muscle cell proliferation	3/96	25/16374	0.000409047	0.0219717	0.0150394	YAP1/ERBB4/FGFR2	3
GO:0048667	cell morphogenesis involved in neuron differentiation	5/96	108/16374	0.000431756	0.0223917	0.0153269	SLC1A3/PREX2/BCL2/LRP4/FGFR2	5
GO:0097192	extrinsic apoptotic signaling pathway in absence of ligand	4/96	61/16374	0.000448321	0.0224238	0.0153489	FOXO3/SGK3/CTNNA1/BCL2	4
GO:0072657	protein localization to membrane	5/96	110/16374	0.000469719	0.0224238	0.0153489	SQSTM1/FERMT2/GSN/SH3PXD2B/DPP10	5
GO:0048754	branching morphogenesis of an epithelial tube	4/96	62/16374	0.000477103	0.0224238	0.0153489	YAP1/TNC/CLIC4/FGFR2	4
GO:0060441	epithelial tube branching involved in lung morphogenesis	3/96	27/16374	0.000515802	0.0232135	0.0158894	YAP1/TNC/FGFR2	3
GO:0043065	positive regulation of apoptotic process	8/96	315/16374	0.000524772	0.0232135	0.0158894	SQSTM1/FOXO3/LPAR1/CLU/STK3/BCL6/PREX1/PTN	8
GO:0060429	epithelium development	7/96	243/16374	0.000564784	0.0238692	0.0163382	YAP1/STK3/CNN3/ERBB4/PTN/LRP4/FGFR2	7
GO:0071300	cellular response to retinoic acid	4/96	65/16374	0.000571336	0.0238692	0.0163382	YAP1/TNC/RORB/FGFR2	4
GO:0042060	wound healing	8/96	328/16374	0.000684088	0.0257084	0.0175971	FN1/TNC/SOX2/GSN/DOCK1/KANK1/PTN/FGFR2	8
GO:0008360	regulation of cell shape	5/96	120/16374	0.00069854	0.0257084	0.0175971	FN1/FERMT2/LPAR1/DLC1/PTN	5
GO:0048732	gland development	5/96	120/16374	0.00069854	0.0257084	0.0175971	TNC/SOX2/ERBB4/BCL2/FGFR2	5
GO:0007406	negative regulation of neuroblast proliferation	2/96	7/16374	0.000700827	0.0257084	0.0175971	CTNNA1/PTN	2
GO:0060449	bud elongation involved in lung branching	2/96	7/16374	0.000700827	0.0257084	0.0175971	YAP1/FGFR2	2
GO:0010001	glial cell differentiation	5/96	121/16374	0.000725309	0.025973	0.0177782	SOX2/LPAR1/GSN/DAAM2/PTN	5
GO:2001240	negative regulation of extrinsic apoptotic signaling pathway in absence of ligand	3/96	31/16374	0.000779319	0.027258	0.0186579	SGK3/CTNNA1/BCL2	3
GO:0007264	small GTPase mediated signal transduction	7/96	262/16374	0.00087998	0.0300793	0.020589	SQSTM1/STARD13/DLC1/DOCK1/ARAP2/PREX1/ITPKB	7
GO:0001547	antral ovarian follicle growth	2/96	8/16374	0.000930867	0.0306667	0.0209911	FOXO3/BMPR1B	2
GO:0031103	axon regeneration	3/96	33/16374	0.000937944	0.0306667	0.0209911	CTNNA1/BCL2/PTN	3
GO:0090263	positive regulation of canonical Wnt signaling pathway	5/96	130/16374	0.00100209	0.0314416	0.0215215	YAP1/GPRC5B/DAAM2/KANK1/FGFR2	5
GO:0042246	tissue regeneration	3/96	34/16374	0.00102436	0.0314416	0.0215215	SOX2/GSN/PTN	3
GO:0120039	plasma membrane bounded cell projection morphogenesis	3/96	34/16374	0.00102436	0.0314416	0.0215215	CD44/ALCAM/KANK1	3
GO:0045597	positive regulation of cell differentiation	3/96	35/16374	0.00111566	0.0334974	0.0229286	SOX2/TCF7L2/BMPR1B	3
GO:0048709	oligodendrocyte differentiation	4/96	78/16374	0.00113588	0.0334974	0.0229286	LPAR1/GSN/DAAM2/PTN	4
GO:0010594	regulation of endothelial cell migration	2/96	9/16374	0.00119226	0.0338332	0.0231585	GLUL/PTN	2
GO:0060512	prostate gland morphogenesis	2/96	9/16374	0.00119226	0.0338332	0.0231585	TNC/FGFR2	2
GO:0042692	muscle cell differentiation	4/96	80/16374	0.00124826	0.0347663	0.0237972	QKI/CTNNA1/MEGF10/FGFR2	4
GO:0048041	focal adhesion assembly	4/96	81/16374	0.00130726	0.0352714	0.0241429	FERMT2/DLC1/BCL2/TESK2	4
GO:0035265	organ growth	3/96	37/16374	0.0013133	0.0352714	0.0241429	STK3/BCL2/FGFR2	3
GO:0001649	osteoblast differentiation	6/96	208/16374	0.00140321	0.037025	0.0253433	TNC/SOX2/SH3PXD2B/BMPR1B/RORB/FGFR2	6
GO:0008284	positive regulation of cell population proliferation	9/96	464/16374	0.00159771	0.0414303	0.0283586	NAMPT/MDM2/FN1/TNC/ERBB4/LIFR/BCL2/PTN/FGFR2	9
GO:0014855	striated muscle cell proliferation	3/96	40/16374	0.00164886	0.0420319	0.0287704	YAP1/ERBB4/FGFR2	3
GO:0034097	response to cytokine	7/96	295/16374	0.00174317	0.0432007	0.0295705	FOXO3/FN1/SOX2/PARP9/BCL6/LIFR/BCL2	7
GO:0060221	retinal rod cell differentiation	2/96	11/16374	0.00180764	0.0432007	0.0295705	RORB/PTN	2
GO:1902043	positive regulation of extrinsic apoptotic signaling pathway via death domain receptors	2/96	11/16374	0.00180764	0.0432007	0.0295705	STK3/BMPR1B	2
GO:0030041	actin filament polymerization	4/96	89/16374	0.00185134	0.0432007	0.0295705	GSN/KANK1/PREX1/MICALL2	4
GO:0001707	mesoderm formation	3/96	42/16374	0.00189974	0.0432007	0.0295705	TXNRD1/ITGB4/FGFR2	3
GO:0022612	gland morphogenesis	3/96	42/16374	0.00189974	0.0432007	0.0295705	TNC/BCL2/FGFR2	3
GO:0038034	signal transduction in absence of ligand	3/96	42/16374	0.00189974	0.0432007	0.0295705	SGK3/CTNNA1/BCL2	3
GO:0035239	tube morphogenesis	7/96	301/16374	0.00195377	0.0432007	0.0295705	MYO1E/YAP1/FN1/GLUL/QKI/CLIC4/FGFR2	7
GO:0033002	muscle cell proliferation	4/96	92/16374	0.00209055	0.0432007	0.0295705	NAMPT/MEGF10/TCF7L2/FGFR2	4
GO:0035295	tube development	5/96	154/16374	0.00211992	0.0432007	0.0295705	YAP1/STK3/BCL2/PTN/FGFR2	5
GO:0006085	acetyl-CoA biosynthetic process	2/96	12/16374	0.00216089	0.0432007	0.0295705	PDK4/ACSS1	2
GO:0021554	optic nerve development	2/96	12/16374	0.00216089	0.0432007	0.0295705	NAV2/LPAR1	2
GO:0048333	mesodermal cell differentiation	2/96	12/16374	0.00216089	0.0432007	0.0295705	ITGB4/FGFR2	2
GO:0071340	skeletal muscle acetylcholine-gated channel clustering	2/96	12/16374	0.00216089	0.0432007	0.0295705	PTN/LRP4	2
GO:0090075	relaxation of muscle	2/96	12/16374	0.00216089	0.0432007	0.0295705	CAMK2D/PDE4B	2
GO:0097284	hepatocyte apoptotic process	2/96	12/16374	0.00216089	0.0432007	0.0295705	GSN/STK3	2
GO:0006897	endocytosis	6/96	227/16374	0.00218302	0.0432007	0.0295705	MYO1E/GSN/CLU/DOCK1/FNBP1/LRP4	6
GO:0048589	developmental growth	5/96	156/16374	0.00224249	0.0438014	0.0299816	SH3PXD2B/STK3/BMPR1B/BCL2/FGFR2	5
GO:0001704	formation of primary germ layer	3/96	45/16374	0.0023186	0.0447073	0.0306017	FN1/ITGB4/FGFR2	3
GO:0001654	eye development	5/96	158/16374	0.00237015	0.0451229	0.0308862	SOX2/SH3PXD2B/BMPR1B/RORB/MEIS2	5
GO:0022405	hair cycle process	3/96	46/16374	0.0024699	0.0464341	0.0317837	LRIG1/BCL2/FGFR2	3
GO:0090090	negative regulation of canonical Wnt signaling pathway	5/96	161/16374	0.00257146	0.0477466	0.0326821	FOXO3/SOX2/STK3/TCF7L2/LRP4	5
GO:0042552	myelination	4/96	98/16374	0.00263152	0.0482659	0.0330376	LPAR1/CLU/QKI/PTN	4
GO:0001503	ossification	6/96	238/16374	0.00276339	0.0499635	0.0341995	TNC/SOX2/BCL2/PTN/LRP4/FGFR2	6
GO:0030330	DNA damage response, signal transduction by p53 class mediator	3/96	48/16374	0.00279051	0.0499635	0.0341995	FOXO3/MDM2/CD44	3
GO:0032469	endoplasmic reticulum calcium ion homeostasis	2/96	14/16374	0.00295675	0.0523171	0.0358106	CAMK2D/BCL2	2
GO:0060038	cardiac muscle cell proliferation	3/96	50/16374	0.00313565	0.0538059	0.0368297	YAP1/ERBB4/FGFR2	3
GO:0016358	dendrite development	4/96	104/16374	0.00326161	0.0538059	0.0368297	PREX2/PREX1/PTN/LRP4	4
GO:0001541	ovarian follicle development	3/96	51/16374	0.00331759	0.0538059	0.0368297	FOXO3/CTNNA1/BCL2	3
GO:0050806	positive regulation of synaptic transmission	3/96	51/16374	0.00331759	0.0538059	0.0368297	SQSTM1/SLC1A3/PTN	3
GO:0072332	intrinsic apoptotic signaling pathway by p53 class mediator	3/96	51/16374	0.00331759	0.0538059	0.0368297	MDM2/CD44/BCL2	3
GO:0001504	neurotransmitter uptake	2/96	15/16374	0.00339865	0.0538059	0.0368297	GLUL/SLC1A3	2
GO:0010717	regulation of epithelial to mesenchymal transition	2/96	15/16374	0.00339865	0.0538059	0.0368297	PHLDB1/TCF7L2	2
GO:0034356	NAD biosynthesis via nicotinamide riboside salvage pathway	2/96	15/16374	0.00339865	0.0538059	0.0368297	NAMPT/PARP9	2
GO:0043518	negative regulation of DNA damage response, signal transduction by p53 class mediator	2/96	15/16374	0.00339865	0.0538059	0.0368297	MDM2/CD44	2
GO:0071305	cellular response to vitamin D	2/96	15/16374	0.00339865	0.0538059	0.0368297	TNC/PTN	2
GO:0055119	relaxation of cardiac muscle	2/96	16/16374	0.00386938	0.0593832	0.0406472	CAMK2D/PDE4B	2
GO:0061684	chaperone-mediated autophagy	2/96	16/16374	0.00386938	0.0593832	0.0406472	CLU/GFAP	2
GO:1902166	negative regulation of intrinsic apoptotic signaling pathway in response to DNA damage by p53 class mediator	2/96	16/16374	0.00386938	0.0593832	0.0406472	CD44/BCL2	2
GO:0010628	positive regulation of gene expression	7/96	346/16374	0.00422939	0.0628597	0.0430269	MDM2/FN1/TNC/GSN/CLU/SH3PXD2B/QKI	7
GO:0030279	negative regulation of ossification	2/96	17/16374	0.00436862	0.0628597	0.0430269	BCL2/LRP4	2
GO:0060740	prostate gland epithelium morphogenesis	2/96	17/16374	0.00436862	0.0628597	0.0430269	TNC/FGFR2	2
GO:0070848	response to growth factor	2/96	17/16374	0.00436862	0.0628597	0.0430269	SOX2/MEIS2	2
GO:0072673	lamellipodium morphogenesis	2/96	17/16374	0.00436862	0.0628597	0.0430269	CD44/KANK1	2
GO:2000811	negative regulation of anoikis	2/96	17/16374	0.00436862	0.0628597	0.0430269	PDK4/BCL2	2
GO:0048598	embryonic morphogenesis	4/96	113/16374	0.00438848	0.0628597	0.0430269	YAP1/PHLDB1/LRIG1/FGFR2	4
GO:0030099	myeloid cell differentiation	5/96	184/16374	0.00454904	0.0645449	0.0441804	FOXO3/KAT2B/BCL6/MEIS2/ITPKB	5
GO:0007507	heart development	6/96	265/16374	0.00467417	0.0657004	0.0449713	KAT2B/SH3PXD2B/STK3/DLC1/ERBB4/PTN	6
GO:0050679	positive regulation of epithelial cell proliferation	3/96	58/16374	0.00477265	0.0663387	0.0454082	GLUL/TCF7L2/FGFR2	3
GO:0045638	negative regulation of myeloid cell differentiation	2/96	18/16374	0.00489601	0.0663387	0.0454082	MEIS2/ITPKB	2
GO:0071800	podosome assembly	2/96	18/16374	0.00489601	0.0663387	0.0454082	GSN/SH3PXD2B	2
GO:2000773	negative regulation of cellular senescence	2/96	18/16374	0.00489601	0.0663387	0.0454082	NAMPT/BCL6	2
GO:0050680	negative regulation of epithelial cell proliferation	3/96	59/16374	0.0050072	0.0672395	0.0460248	SOX2/PTN/FGFR2	3
GO:0006914	autophagy	7/96	359/16374	0.00516167	0.0686424	0.0469851	NAMPT/SQSTM1/FOXO3/CLU/ITGB4/BCL2/GFAP	7
GO:0001944	vasculature development	3/96	60/16374	0.00524859	0.0686424	0.0469851	MDM2/CLIC4/TCF7L2	3
GO:0010977	negative regulation of neuron projection development	3/96	60/16374	0.00524859	0.0686424	0.0469851	MDM2/LPAR1/KANK1	3
GO:0018108	peptidyl-tyrosine phosphorylation	6/96	272/16374	0.00529848	0.0686976	0.0470228	CD44/PARP9/ERBB4/TESK2/LRP4/FGFR2	6
GO:0009880	embryonic pattern specification	2/96	19/16374	0.00545121	0.0694731	0.0475537	ERBB4/FGFR2	2
GO:0010996	response to auditory stimulus	2/96	19/16374	0.00545121	0.0694731	0.0475537	SLC1A3/PTN	2
GO:0009612	response to mechanical stimulus	3/96	61/16374	0.00549688	0.0694731	0.0475537	TNC/SLC1A3/MEIS2	3
GO:0050673	epithelial cell proliferation	6/96	275/16374	0.00558399	0.0699861	0.0479048	YAP1/SOX2/GLUL/TCF7L2/PTN/FGFR2	6
GO:0048514	blood vessel morphogenesis	6/96	279/16374	0.00598203	0.0714565	0.0489113	MYO1E/YAP1/FN1/GLUL/QKI/FGFR2	6
GO:0071277	cellular response to calcium ion	3/96	63/16374	0.00601437	0.0714565	0.0489113	CAMK2D/CLIC4/ITPKB	3
GO:0010039	response to iron ion	2/96	20/16374	0.00603389	0.0714565	0.0489113	MDM2/BCL2	2
GO:0030850	prostate gland development	2/96	20/16374	0.00603389	0.0714565	0.0489113	TNC/FGFR2	2
GO:0033622	integrin activation	2/96	20/16374	0.00603389	0.0714565	0.0489113	FN1/FERMT2	2
GO:0046827	positive regulation of protein export from nucleus	2/96	20/16374	0.00603389	0.0714565	0.0489113	MDM2/TCF7L2	2
GO:0061082	myeloid leukocyte cytokine production	2/96	20/16374	0.00603389	0.0714565	0.0489113	GPRC5B/BCL6	2
GO:0051291	protein heterooligomerization	3/96	64/16374	0.00628367	0.0738331	0.050538	SQSTM1/MAT2A/CTNNA1	3
GO:0031032	actomyosin structure organization	4/96	127/16374	0.00662045	0.0762759	0.0522101	LPAR1/SH3PXD2B/DLC1/CNN3	4
GO:0031290	retinal ganglion cell axon guidance	2/96	21/16374	0.00664371	0.0762759	0.0522101	ALCAM/BMPR1B	2
GO:0086004	regulation of cardiac muscle cell contraction	2/96	21/16374	0.00664371	0.0762759	0.0522101	CAMK2D/PDE4B	2
GO:0071310	cellular response to organic substance	6/96	289/16374	0.00706749	0.0805266	0.0551197	FOXO3/FN1/SOX2/BCL6/LIFR/BCL2	6
GO:0019221	cytokine-mediated signaling pathway	7/96	383/16374	0.00727961	0.0817137	0.0559323	FOXO3/FN1/SOX2/PARP9/BCL6/LIFR/BCL2	7
GO:0098727	maintenance of cell number	2/96	22/16374	0.00728034	0.0817137	0.0559323	YAP1/PTN	2
GO:0023014	signal transduction by protein phosphorylation	4/96	132/16374	0.00757113	0.084348	0.0577354	SOX2/LPAR1/PHLPP1/FGFR2	4
GO:0007569	cell aging	3/96	69/16374	0.00773761	0.0846677	0.0579543	NAMPT/BCL6/BCL2	3
GO:0007399	nervous system development	8/96	488/16374	0.00789567	0.0846677	0.0579543	CRIM1/NAV2/STK3/SEMA6A/FUT9/ERBB4/PTN/FGFR2	8
GO:0009966	regulation of signal transduction	2/96	23/16374	0.00794346	0.0846677	0.0579543	GPC6/GPC5	2
GO:0051674	localization of cell	2/96	23/16374	0.00794346	0.0846677	0.0579543	DST/ITGB4	2
GO:0097150	neuronal stem cell population maintenance	2/96	23/16374	0.00794346	0.0846677	0.0579543	FOXO3/SOX2	2
GO:0001570	vasculogenesis	3/96	70/16374	0.00805019	0.0846677	0.0579543	MYO1E/YAP1/QKI	3
GO:0008630	intrinsic apoptotic signaling pathway in response to DNA damage	3/96	70/16374	0.00805019	0.0846677	0.0579543	CD44/CLU/BCL2	3
GO:0042475	odontogenesis of dentin-containing tooth	3/96	70/16374	0.00805019	0.0846677	0.0579543	TNC/CTNNA1/LRP4	3
GO:0043547	positive regulation of GTPase activity	6/96	298/16374	0.00816079	0.085235	0.0583425	STARD13/DLC1/DOCK1/PREX2/ARAP2/PREX1	6
GO:0031069	hair follicle morphogenesis	2/96	24/16374	0.00863273	0.0889289	0.060871	BCL2/FGFR2	2
GO:0048736	appendage development	2/96	24/16374	0.00863273	0.0889289	0.060871	BMPR1B/ITGB4	2
GO:0072089	stem cell proliferation	3/96	72/16374	0.00869746	0.0889863	0.0609103	YAP1/CTNNA1/PTN	3
GO:0002009	morphogenesis of an epithelium	3/96	73/16374	0.00903223	0.0911709	0.0624056	CLIC4/BCL2/FGFR2	3
GO:0007015	actin filament organization	3/96	73/16374	0.00903223	0.0911709	0.0624056	GSN/CTNNA1/BCL2	3
GO:0006027	glycosaminoglycan catabolic process	2/96	25/16374	0.00934783	0.0918898	0.0628977	GPC6/GPC5	2
GO:0006471	protein ADP-ribosylation	2/96	25/16374	0.00934783	0.0918898	0.0628977	KAT2B/PARP9	2
GO:0033028	myeloid cell apoptotic process	2/96	25/16374	0.00934783	0.0918898	0.0628977	ITPKB/BCL2	2
GO:0033687	osteoblast proliferation	2/96	25/16374	0.00934783	0.0918898	0.0628977	BCL2/FGFR2	2
GO:0030198	extracellular matrix organization	5/96	221/16374	0.00969653	0.094356	0.0645858	FN1/TNC/CD44/COL4A5/ITGB4	5
GO:0008585	female gonad development	3/96	75/16374	0.00972419	0.094356	0.0645858	FOXO3/CTNNA1/BCL2	3
GO:0051056	regulation of small GTPase mediated signal transduction	4/96	143/16374	0.00996932	0.0954278	0.0653194	STARD13/DLC1/ARAP2/PREX1	4
GO:0000902	cell morphogenesis	3/96	76/16374	0.0100815	0.0954278	0.0653194	YAP1/CLU/BCL6	3
GO:0009791	post-embryonic development	3/96	76/16374	0.0100815	0.0954278	0.0653194	MYO1E/BCL2/FGFR2	3
GO:0070372	regulation of ERK1 and ERK2 cascade	2/96	26/16374	0.0100884	0.0954278	0.0653194	FN1/FGFR2	2
GO:0001942	hair follicle development	3/96	77/16374	0.0104463	0.098195	0.0672135	BCL2/LRP4/FGFR2	3
GO:0030038	contractile actin filament bundle assembly	3/96	78/16374	0.0108187	0.100152	0.0685532	LPAR1/SH3PXD2B/DLC1	3
GO:0035108	limb morphogenesis	3/96	78/16374	0.0108187	0.100152	0.0685532	BMPR1B/LRP4/FGFR2	3
GO:0060411	cardiac septum morphogenesis	2/96	27/16374	0.0108543	0.100152	0.0685532	MDM2/FGFR2	2
GO:0043542	endothelial cell migration	4/96	147/16374	0.0109506	0.100425	0.0687397	STARD13/GLUL/SASH1/PTN	4
GO:0010631	epithelial cell migration	4/96	148/16374	0.0112052	0.101826	0.0696987	GLUL/DOCK1/SASH1/PTN	4
GO:0034504	protein localization to nucleus	4/96	149/16374	0.0114637	0.101826	0.0696987	MDM2/GLUL/PARP9/OTUD7B	4
GO:0035264	multicellular organism growth	4/96	149/16374	0.0114637	0.101826	0.0696987	SH3PXD2B/CLIC4/BCL2/FGFR2	4
GO:0120036	plasma membrane bounded cell projection organization	5/96	231/16374	0.0115838	0.101826	0.0696987	MDM2/LPAR1/KANK1/PTN/GRID2	5
GO:0008625	extrinsic apoptotic signaling pathway via death domain receptors	3/96	80/16374	0.0115864	0.101826	0.0696987	STK3/BMPR1B/BCL2	3
GO:0048705	skeletal system morphogenesis	3/96	80/16374	0.0115864	0.101826	0.0696987	SH3PXD2B/BMPR1B/FGFR2	3
GO:0048730	epidermis morphogenesis	2/96	28/16374	0.0116449	0.101826	0.0696987	BCL2/FGFR2	2
GO:0097485	neuron projection guidance	2/96	28/16374	0.0116449	0.101826	0.0696987	ALCAM/TUBB2B	2
GO:0014031	mesenchymal cell development	2/96	29/16374	0.0124602	0.106478	0.0728833	ERBB4/BCL2	2
GO:0045931	positive regulation of mitotic cell cycle	2/96	29/16374	0.0124602	0.106478	0.0728833	MDM2/MEIS2	2
GO:0071480	cellular response to gamma radiation	2/96	29/16374	0.0124602	0.106478	0.0728833	MDM2/YAP1	2
GO:0086003	cardiac muscle cell contraction	2/96	29/16374	0.0124602	0.106478	0.0728833	CAMK2D/PDE4B	2
GO:0048565	digestive tract development	3/96	83/16374	0.0127956	0.10868	0.0743901	ITGB4/BCL2/FGFR2	3
GO:0043491	protein kinase B signaling	5/96	240/16374	0.0134843	0.10868	0.0743901	PHLPP1/STK3/TCF7L2/ERBB4/FGFR2	5
GO:0035023	regulation of Rho protein signal transduction	3/96	85/16374	0.0136403	0.10868	0.0743901	PREX2/KANK1/PREX1	3
GO:0048167	regulation of synaptic plasticity	3/96	85/16374	0.0136403	0.10868	0.0743901	SQSTM1/PTN/GRID2	3
GO:0006928	movement of cell or subcellular component	3/96	86/16374	0.0140744	0.10868	0.0743901	CTNNA1/BCL6/ERBB4	3
GO:0060485	mesenchyme development	2/96	31/16374	0.0141632	0.10868	0.0743901	MDM2/FGFR2	2
GO:0051897	positive regulation of protein kinase B signaling	4/96	160/16374	0.0145632	0.10868	0.0743901	STK3/TCF7L2/ERBB4/FGFR2	4
GO:0060333	interferon-gamma-mediated signaling pathway	3/96	88/16374	0.0149659	0.10868	0.0743901	CAMK2D/CD44/PARP9	3
GO:0032835	glomerulus development	2/96	32/16374	0.0150503	0.10868	0.0743901	MYO1E/BCL2	2
GO:0040018	positive regulation of multicellular organism growth	2/96	32/16374	0.0150503	0.10868	0.0743901	SH3PXD2B/BCL2	2
GO:0034341	response to interferon-gamma	3/96	90/16374	0.0158887	0.10868	0.0743901	CAMK2D/CD44/PARP9	3
GO:0014003	oligodendrocyte development	2/96	33/16374	0.0159608	0.10868	0.0743901	LPAR1/GSN	2
GO:0046677	response to antibiotic	2/96	33/16374	0.0159608	0.10868	0.0743901	MDM2/SLC1A3	2
GO:0061351	neural precursor cell proliferation	3/96	91/16374	0.0163619	0.10868	0.0743901	FOXO3/CTNNA1/PTN	3
GO:0008154	actin polymerization or depolymerization	3/96	92/16374	0.0168429	0.10868	0.0743901	PLEKHH2/KANK1/PREX1	3
GO:0043149	stress fiber assembly	3/96	92/16374	0.0168429	0.10868	0.0743901	LPAR1/SH3PXD2B/DLC1	3
GO:0042594	response to starvation	2/96	34/16374	0.0168943	0.10868	0.0743901	PDK4/FOXO3	2
GO:0043276	anoikis	2/96	34/16374	0.0168943	0.10868	0.0743901	PDK4/BCL2	2
GO:0046632	alpha-beta T cell differentiation	2/96	34/16374	0.0168943	0.10868	0.0743901	ITPKB/BCL2	2
GO:0001550	ovarian cumulus expansion	1/96	3/16374	0.017487	0.10868	0.0743901	BMPR1B	1
GO:0001887	selenium compound metabolic process	1/96	3/16374	0.017487	0.10868	0.0743901	TXNRD1	1
GO:0002434	immune complex clearance	1/96	3/16374	0.017487	0.10868	0.0743901	CLU	1
GO:0002667	regulation of T cell anergy	1/96	3/16374	0.017487	0.10868	0.0743901	PHLPP1	1
GO:0007161	calcium-independent cell-matrix adhesion	1/96	3/16374	0.017487	0.10868	0.0743901	FN1	1
GO:0009449	gamma-aminobutyric acid biosynthetic process	1/96	3/16374	0.017487	0.10868	0.0743901	SLC1A3	1
GO:0010623	programmed cell death involved in cell development	1/96	3/16374	0.017487	0.10868	0.0743901	BCL2	1
GO:0010909	positive regulation of heparan sulfate proteoglycan biosynthetic process	1/96	3/16374	0.017487	0.10868	0.0743901	TCF7L2	1
GO:0014916	regulation of lung blood pressure	1/96	3/16374	0.017487	0.10868	0.0743901	NAMPT	1
GO:0019065	receptor-mediated endocytosis of virus by host cell	1/96	3/16374	0.017487	0.10868	0.0743901	EPS15	1
GO:0019740	nitrogen utilization	1/96	3/16374	0.017487	0.10868	0.0743901	BCL2	1
GO:0021564	vagus nerve development	1/96	3/16374	0.017487	0.10868	0.0743901	NAV2	1
GO:0021747	cochlear nucleus development	1/96	3/16374	0.017487	0.10868	0.0743901	BCL2	1
GO:0021783	preganglionic parasympathetic fiber development	1/96	3/16374	0.017487	0.10868	0.0743901	NAV2	1
GO:0030835	negative regulation of actin filament depolymerization	1/96	3/16374	0.017487	0.10868	0.0743901	PLEKHH2	1
GO:0032350	regulation of hormone metabolic process	1/96	3/16374	0.017487	0.10868	0.0743901	TCF7L2	1
GO:0032474	otolith morphogenesis	1/96	3/16374	0.017487	0.10868	0.0743901	LRIG1	1
GO:0033688	regulation of osteoblast proliferation	1/96	3/16374	0.017487	0.10868	0.0743901	FGFR2	1
GO:0035166	post-embryonic hemopoiesis	1/96	3/16374	0.017487	0.10868	0.0743901	MYO1E	1
GO:0036369	transcription factor catabolic process	1/96	3/16374	0.017487	0.10868	0.0743901	MDM2	1
GO:0045069	regulation of viral genome replication	1/96	3/16374	0.017487	0.10868	0.0743901	BCL2	1
GO:0046320	regulation of fatty acid oxidation	1/96	3/16374	0.017487	0.10868	0.0743901	PDK4	1
GO:0048165	fused antrum stage	1/96	3/16374	0.017487	0.10868	0.0743901	BMPR1B	1
GO:0048753	pigment granule organization	1/96	3/16374	0.017487	0.10868	0.0743901	BCL2	1
GO:0060378	regulation of brood size	1/96	3/16374	0.017487	0.10868	0.0743901	SH3PXD2B	1
GO:0060447	bud outgrowth involved in lung branching	1/96	3/16374	0.017487	0.10868	0.0743901	TNC	1
GO:0060523	prostate epithelial cord elongation	1/96	3/16374	0.017487	0.10868	0.0743901	FGFR2	1
GO:0060594	mammary gland specification	1/96	3/16374	0.017487	0.10868	0.0743901	FGFR2	1
GO:0060648	mammary gland bud morphogenesis	1/96	3/16374	0.017487	0.10868	0.0743901	FGFR2	1
GO:0060688	regulation of morphogenesis of a branching structure	1/96	3/16374	0.017487	0.10868	0.0743901	FGFR2	1
GO:0060800	regulation of cell differentiation involved in embryonic placenta development	1/96	3/16374	0.017487	0.10868	0.0743901	STK3	1
GO:0061740	protein targeting to lysosome involved in chaperone-mediated autophagy	1/96	3/16374	0.017487	0.10868	0.0743901	CLU	1
GO:0071386	cellular response to corticosterone stimulus	1/96	3/16374	0.017487	0.10868	0.0743901	FOXO3	1
GO:0071453	cellular response to oxygen levels	1/96	3/16374	0.017487	0.10868	0.0743901	LPAR1	1
GO:0071801	regulation of podosome assembly	1/96	3/16374	0.017487	0.10868	0.0743901	GSN	1
GO:0072717	cellular response to actinomycin D	1/96	3/16374	0.017487	0.10868	0.0743901	MDM2	1
GO:0140059	dendrite arborization	1/96	3/16374	0.017487	0.10868	0.0743901	PTN	1
GO:1900625	positive regulation of monocyte aggregation	1/96	3/16374	0.017487	0.10868	0.0743901	CD44	1
GO:1902174	positive regulation of keratinocyte apoptotic process	1/96	3/16374	0.017487	0.10868	0.0743901	GSN	1
GO:1902306	negative regulation of sodium ion transmembrane transport	1/96	3/16374	0.017487	0.10868	0.0743901	CAMK2D	1
GO:1902731	negative regulation of chondrocyte proliferation	1/96	3/16374	0.017487	0.10868	0.0743901	BMPR1B	1
GO:1902988	neurofibrillary tangle assembly	1/96	3/16374	0.017487	0.10868	0.0743901	CLU	1
GO:1903706	regulation of hemopoiesis	1/96	3/16374	0.017487	0.10868	0.0743901	PTN	1
GO:1904579	cellular response to thapsigargin	1/96	3/16374	0.017487	0.10868	0.0743901	CLU	1
GO:1904749	regulation of protein localization to nucleolus	1/96	3/16374	0.017487	0.10868	0.0743901	GLUL	1
GO:2000050	regulation of non-canonical Wnt signaling pathway	1/96	3/16374	0.017487	0.10868	0.0743901	DAAM2	1
GO:2000392	regulation of lamellipodium morphogenesis	1/96	3/16374	0.017487	0.10868	0.0743901	CD44	1
GO:0043410	positive regulation of MAPK cascade	3/96	94/16374	0.0178287	0.108694	0.0743998	SOX2/LPAR1/FGFR2	3
GO:0048659	smooth muscle cell proliferation	3/96	94/16374	0.0178287	0.108694	0.0743998	NAMPT/TCF7L2/FGFR2	3
GO:0030177	positive regulation of Wnt signaling pathway	2/96	35/16374	0.0178506	0.108694	0.0743998	KANK1/FGFR2	2
GO:0048546	digestive tract morphogenesis	2/96	35/16374	0.0178506	0.108694	0.0743998	BCL2/FGFR2	2
GO:2001237	negative regulation of extrinsic apoptotic signaling pathway	2/96	35/16374	0.0178506	0.108694	0.0743998	YAP1/TCF7L2	2
GO:0006911	phagocytosis, engulfment	2/96	36/16374	0.0188294	0.112378	0.076922	GSN/DOCK1	2
GO:0007157	heterophilic cell-cell adhesion via plasma membrane cell adhesion molecules	2/96	36/16374	0.0188294	0.112378	0.076922	ALCAM/GRID2	2
GO:0048599	oocyte development	2/96	36/16374	0.0188294	0.112378	0.076922	FOXO3/BCL2	2
GO:1900026	positive regulation of substrate adhesion-dependent cell spreading	2/96	36/16374	0.0188294	0.112378	0.076922	DOCK1/PREX1	2
GO:1904646	cellular response to amyloid-beta	2/96	36/16374	0.0188294	0.112378	0.076922	NAMPT/FOXO3	2
GO:0007411	axon guidance	4/96	175/16374	0.0195767	0.116377	0.0796589	SEMA6A/ALCAM/MATN2/TUBB2B	4
GO:0007050	cell cycle arrest	4/96	176/16374	0.0199443	0.116552	0.079779	MDM2/SOX2/KAT2B/TCF7L2	4
GO:0006464	cellular protein modification process	6/96	365/16374	0.0204037	0.116552	0.079779	SQSTM1/FN1/KAT2B/DLC1/ERBB4/ITPKB	6
GO:0072359	circulatory system development	4/96	178/16374	0.0206924	0.116552	0.079779	KAT2B/SH3PXD2B/ERBB4/PTN	4
GO:0010463	mesenchymal cell proliferation	2/96	38/16374	0.0208531	0.116552	0.079779	PTN/FGFR2	2
GO:0030501	positive regulation of bone mineralization	2/96	38/16374	0.0208531	0.116552	0.079779	BMPR1B/PTN	2
GO:0035329	hippo signaling	2/96	38/16374	0.0208531	0.116552	0.079779	YAP1/STK3	2
GO:0009887	animal organ morphogenesis	5/96	269/16374	0.021014	0.116552	0.079779	MDM2/YAP1/SEMA6A/BMPR1B/FGFR2	5
GO:0070371	ERK1 and ERK2 cascade	5/96	269/16374	0.021014	0.116552	0.079779	FN1/CD44/SEMA6A/ERBB4/FGFR2	5
GO:0030890	positive regulation of B cell proliferation	2/96	39/16374	0.0218975	0.116552	0.079779	BCL6/BCL2	2
GO:0032024	positive regulation of insulin secretion	2/96	39/16374	0.0218975	0.116552	0.079779	GLUL/TCF7L2	2
GO:0001774	microglial cell activation	2/96	40/16374	0.0229632	0.116552	0.079779	NAMPT/CLU	2
GO:0042770	signal transduction in response to DNA damage	2/96	40/16374	0.0229632	0.116552	0.079779	MDM2/CD44	2
GO:0001767	establishment of lymphocyte polarity	1/96	4/16374	0.0232485	0.116552	0.079779	GSN	1
GO:0002051	osteoblast fate commitment	1/96	4/16374	0.0232485	0.116552	0.079779	SH3PXD2B	1
GO:0006538	glutamate catabolic process	1/96	4/16374	0.0232485	0.116552	0.079779	GLUL	1
GO:0006556	S-adenosylmethionine biosynthetic process	1/96	4/16374	0.0232485	0.116552	0.079779	MAT2A	1
GO:0006931	substrate-dependent cell migration, cell attachment to substrate	1/96	4/16374	0.0232485	0.116552	0.079779	FN1	1
GO:0007089	traversing start control point of mitotic cell cycle	1/96	4/16374	0.0232485	0.116552	0.079779	MDM2	1
GO:0010453	regulation of cell fate commitment	1/96	4/16374	0.0232485	0.116552	0.079779	FGFR2	1
GO:0010523	negative regulation of calcium ion transport into cytosol	1/96	4/16374	0.0232485	0.116552	0.079779	BCL2	1
GO:0018076	N-terminal peptidyl-lysine acetylation	1/96	4/16374	0.0232485	0.116552	0.079779	KAT2B	1
GO:0021769	orbitofrontal cortex development	1/96	4/16374	0.0232485	0.116552	0.079779	FGFR2	1
GO:0032286	central nervous system myelin maintenance	1/96	4/16374	0.0232485	0.116552	0.079779	CLU	1
GO:0035948	obsolete positive regulation of gluconeogenesis by positive regulation of transcription from RNA polymerase II promoter	1/96	4/16374	0.0232485	0.116552	0.079779	KAT2B	1
GO:0036378	calcitriol biosynthetic process from calciol	1/96	4/16374	0.0232485	0.116552	0.079779	CYP27A1	1
GO:0038165	oncostatin-M-mediated signaling pathway	1/96	4/16374	0.0232485	0.116552	0.079779	LIFR	1
GO:0043500	muscle adaptation	1/96	4/16374	0.0232485	0.116552	0.079779	FOXO3	1
GO:0043570	maintenance of DNA repeat elements	1/96	4/16374	0.0232485	0.116552	0.079779	TCF7L2	1
GO:0045472	response to ether	1/96	4/16374	0.0232485	0.116552	0.079779	MDM2	1
GO:0045629	negative regulation of T-helper 2 cell differentiation	1/96	4/16374	0.0232485	0.116552	0.079779	BCL6	1
GO:0046666	retinal cell programmed cell death	1/96	4/16374	0.0232485	0.116552	0.079779	BCL2	1
GO:0048861	leukemia inhibitory factor signaling pathway	1/96	4/16374	0.0232485	0.116552	0.079779	LIFR	1
GO:0070486	leukocyte aggregation	1/96	4/16374	0.0232485	0.116552	0.079779	CD44	1
GO:0070779	D-aspartate import across plasma membrane	1/96	4/16374	0.0232485	0.116552	0.079779	SLC1A3	1
GO:0071673	positive regulation of smooth muscle cell chemotaxis	1/96	4/16374	0.0232485	0.116552	0.079779	LPAR1	1
GO:0090521	glomerular visceral epithelial cell migration	1/96	4/16374	0.0232485	0.116552	0.079779	KANK1	1
GO:0090527	actin filament reorganization	1/96	4/16374	0.0232485	0.116552	0.079779	GSN	1
GO:0097090	presynaptic membrane organization	1/96	4/16374	0.0232485	0.116552	0.079779	LRP4	1
GO:0110021	cardiac muscle myoblast proliferation	1/96	4/16374	0.0232485	0.116552	0.079779	MEIS2	1
GO:0110024	positive regulation of cardiac muscle myoblast proliferation	1/96	4/16374	0.0232485	0.116552	0.079779	MEIS2	1
GO:1900069	regulation of cellular hyperosmotic salinity response	1/96	4/16374	0.0232485	0.116552	0.079779	EFHD1	1
GO:1900221	regulation of amyloid-beta clearance	1/96	4/16374	0.0232485	0.116552	0.079779	CLU	1
GO:1901300	positive regulation of hydrogen peroxide-mediated programmed cell death	1/96	4/16374	0.0232485	0.116552	0.079779	FOXO3	1
GO:1901797	negative regulation of signal transduction by p53 class mediator	1/96	4/16374	0.0232485	0.116552	0.079779	MDM2	1
GO:1902969	mitotic DNA replication	1/96	4/16374	0.0232485	0.116552	0.079779	BCL6	1
GO:1903670	regulation of sprouting angiogenesis	1/96	4/16374	0.0232485	0.116552	0.079779	GLUL	1
GO:1905908	positive regulation of amyloid fibril formation	1/96	4/16374	0.0232485	0.116552	0.079779	CLU	1
GO:0030282	bone mineralization	3/96	105/16374	0.0238166	0.117468	0.0804059	BMPR1B/PTN/FGFR2	3
GO:0048762	mesenchymal cell differentiation	3/96	105/16374	0.0238166	0.117468	0.0804059	PHLDB1/BCL2/FGFR2	3
GO:0001932	regulation of protein phosphorylation	2/96	41/16374	0.02405	0.117468	0.0804059	FN1/ITPKB	2
GO:0032456	endocytic recycling	2/96	41/16374	0.02405	0.117468	0.0804059	EPS15/MICALL2	2
GO:0071456	cellular response to hypoxia	4/96	187/16374	0.0242714	0.117468	0.0804059	FOXO3/MDM2/BCL2/PTN	4
GO:0098609	cell-cell adhesion	4/96	187/16374	0.0242714	0.117468	0.0804059	CD44/SOX2/CNN3/BCL2	4
GO:0071363	cellular response to growth factor stimulus	5/96	280/16374	0.0244689	0.117468	0.0804059	MDM2/FERMT2/BMPR1B/LRP4/FGFR2	5
GO:0008406	gonad development	3/96	107/16374	0.0250084	0.117468	0.0804059	FOXO3/CTNNA1/BCL2	3
GO:0050900	leukocyte migration	4/96	189/16374	0.0251145	0.117468	0.0804059	FN1/CD44/PDE4B/PTN	4
GO:0006801	superoxide metabolic process	2/96	42/16374	0.0251575	0.117468	0.0804059	SH3PXD2B/PREX1	2
GO:0032570	response to progesterone	2/96	42/16374	0.0251575	0.117468	0.0804059	YAP1/PTN	2
GO:0043297	apical junction assembly	2/96	42/16374	0.0251575	0.117468	0.0804059	CTNNA1/MICALL2	2
GO:0055123	digestive system development	2/96	42/16374	0.0251575	0.117468	0.0804059	ITGB4/FGFR2	2
GO:0048608	reproductive structure development	3/96	109/16374	0.026232	0.117468	0.0804059	FOXO3/TNC/FGFR2	3
GO:0042771	intrinsic apoptotic signaling pathway in response to DNA damage by p53 class mediator	2/96	43/16374	0.0262855	0.117468	0.0804059	CD44/BCL2	2
GO:0097581	lamellipodium organization	2/96	43/16374	0.0262855	0.117468	0.0804059	CD44/KANK1	2
GO:0048666	neuron development	4/96	193/16374	0.0268535	0.117468	0.0804059	EFHD1/SLC1A3/NTM/MICALL2	4
GO:0030029	actin filament-based process	3/96	110/16374	0.0268557	0.117468	0.0804059	CTNNA1/DLC1/BCL2	3
GO:0061564	axon development	3/96	110/16374	0.0268557	0.117468	0.0804059	BCL2/PTN/FGFR2	3
GO:0007409	axonogenesis	5/96	288/16374	0.0271993	0.117468	0.0804059	SEMA6A/MATN2/BCL2/LRP4/FGFR2	5
GO:0007163	establishment or maintenance of cell polarity	2/96	44/16374	0.0274337	0.117468	0.0804059	CTNNA1/KANK1	2
GO:0003007	heart morphogenesis	3/96	111/16374	0.0274873	0.117468	0.0804059	MDM2/YAP1/DLC1	3
GO:0042127	regulation of cell population proliferation	3/96	112/16374	0.0281268	0.117468	0.0804059	SGK3/CLU/EPS15	3
GO:0007405	neuroblast proliferation	2/96	45/16374	0.0286018	0.117468	0.0804059	CTNNA1/PTN	2
GO:0038066	p38MAPK cascade	2/96	45/16374	0.0286018	0.117468	0.0804059	PHLPP1/SASH1	2
GO:0007568	aging	4/96	197/16374	0.0286633	0.117468	0.0804059	NAMPT/FOXO3/GSN/CTNNA1	4
GO:0045471	response to ethanol	3/96	113/16374	0.0287742	0.117468	0.0804059	TNC/GSN/FGFR2	3
GO:0002232	leukocyte chemotaxis involved in inflammatory response	1/96	5/16374	0.0289765	0.117468	0.0804059	PTN	1
GO:0002326	B cell lineage commitment	1/96	5/16374	0.0289765	0.117468	0.0804059	BCL2	1
GO:0002634	regulation of germinal center formation	1/96	5/16374	0.0289765	0.117468	0.0804059	BCL6	1
GO:0002870	T cell anergy	1/96	5/16374	0.0289765	0.117468	0.0804059	PHLPP1	1
GO:0006537	glutamate biosynthetic process	1/96	5/16374	0.0289765	0.117468	0.0804059	SLC1A3	1
GO:0006807	nitrogen compound metabolic process	1/96	5/16374	0.0289765	0.117468	0.0804059	MYO1E	1
GO:0008038	neuron recognition	1/96	5/16374	0.0289765	0.117468	0.0804059	NTM	1
GO:0010265	SCF complex assembly	1/96	5/16374	0.0289765	0.117468	0.0804059	FBXL7	1
GO:0010649	regulation of cell communication by electrical coupling	1/96	5/16374	0.0289765	0.117468	0.0804059	CAMK2D	1
GO:0014042	positive regulation of neuron maturation	1/96	5/16374	0.0289765	0.117468	0.0804059	BCL2	1
GO:0014889	muscle atrophy	1/96	5/16374	0.0289765	0.117468	0.0804059	FOXO3	1
GO:0021563	glossopharyngeal nerve development	1/96	5/16374	0.0289765	0.117468	0.0804059	NAV2	1
GO:0021781	glial cell fate commitment	1/96	5/16374	0.0289765	0.117468	0.0804059	SOX2	1
GO:0022898	regulation of transmembrane transporter activity	1/96	5/16374	0.0289765	0.117468	0.0804059	BCL2	1
GO:0033033	negative regulation of myeloid cell apoptotic process	1/96	5/16374	0.0289765	0.117468	0.0804059	BCL2	1
GO:0038044	transforming growth factor-beta secretion	1/96	5/16374	0.0289765	0.117468	0.0804059	FN1	1
GO:0042180	cellular ketone metabolic process	1/96	5/16374	0.0289765	0.117468	0.0804059	PDK4	1
GO:0042989	sequestering of actin monomers	1/96	5/16374	0.0289765	0.117468	0.0804059	GSN	1
GO:0043932	ossification involved in bone remodeling	1/96	5/16374	0.0289765	0.117468	0.0804059	PTN	1
GO:0045636	positive regulation of melanocyte differentiation	1/96	5/16374	0.0289765	0.117468	0.0804059	BCL2	1
GO:0048289	isotype switching to IgE isotypes	1/96	5/16374	0.0289765	0.117468	0.0804059	BCL6	1
GO:0048625	myoblast fate commitment	1/96	5/16374	0.0289765	0.117468	0.0804059	TCF7L2	1
GO:0048680	positive regulation of axon regeneration	1/96	5/16374	0.0289765	0.117468	0.0804059	PTN	1
GO:0048743	positive regulation of skeletal muscle fiber development	1/96	5/16374	0.0289765	0.117468	0.0804059	BCL2	1
GO:0051147	regulation of muscle cell differentiation	1/96	5/16374	0.0289765	0.117468	0.0804059	MEGF10	1
GO:0051179	localization	1/96	5/16374	0.0289765	0.117468	0.0804059	CAMK2D	1
GO:0051702	interaction with symbiont	1/96	5/16374	0.0289765	0.117468	0.0804059	FN1	1
GO:0060501	positive regulation of epithelial cell proliferation involved in lung morphogenesis	1/96	5/16374	0.0289765	0.117468	0.0804059	FGFR2	1
GO:0060525	prostate glandular acinus development	1/96	5/16374	0.0289765	0.117468	0.0804059	FGFR2	1
GO:0060664	epithelial cell proliferation involved in salivary gland morphogenesis	1/96	5/16374	0.0289765	0.117468	0.0804059	FGFR2	1
GO:0060916	mesenchymal cell proliferation involved in lung development	1/96	5/16374	0.0289765	0.117468	0.0804059	FGFR2	1
GO:0070487	monocyte aggregation	1/96	5/16374	0.0289765	0.117468	0.0804059	CD44	1
GO:0071681	cellular response to indole-3-methanol	1/96	5/16374	0.0289765	0.117468	0.0804059	CTNNA1	1
GO:0071799	cellular response to prostaglandin D stimulus	1/96	5/16374	0.0289765	0.117468	0.0804059	TNC	1
GO:0071866	negative regulation of apoptotic process in bone marrow cell	1/96	5/16374	0.0289765	0.117468	0.0804059	FGFR2	1
GO:0072201	negative regulation of mesenchymal cell proliferation	1/96	5/16374	0.0289765	0.117468	0.0804059	PTN	1
GO:1900028	negative regulation of ruffle assembly	1/96	5/16374	0.0289765	0.117468	0.0804059	KANK1	1
GO:1901841	regulation of high voltage-gated calcium channel activity	1/96	5/16374	0.0289765	0.117468	0.0804059	PDE4B	1
GO:1902254	negative regulation of intrinsic apoptotic signaling pathway by p53 class mediator	1/96	5/16374	0.0289765	0.117468	0.0804059	MDM2	1
GO:1904179	positive regulation of adipose tissue development	1/96	5/16374	0.0289765	0.117468	0.0804059	SH3PXD2B	1
GO:1904261	positive regulation of basement membrane assembly involved in embryonic body morphogenesis	1/96	5/16374	0.0289765	0.117468	0.0804059	PHLDB1	1
GO:1904714	regulation of chaperone-mediated autophagy	1/96	5/16374	0.0289765	0.117468	0.0804059	GFAP	1
GO:1905907	negative regulation of amyloid fibril formation	1/96	5/16374	0.0289765	0.117468	0.0804059	CLU	1
GO:2001197	basement membrane assembly involved in embryonic body morphogenesis	1/96	5/16374	0.0289765	0.117468	0.0804059	PHLDB1	1
GO:0043588	skin development	3/96	114/16374	0.0294295	0.118984	0.0814432	YAP1/CLIC4/ITGB4	3
GO:0006024	glycosaminoglycan biosynthetic process	2/96	46/16374	0.0297896	0.119476	0.0817804	GPC6/GPC5	2
GO:0031648	protein destabilization	2/96	46/16374	0.0297896	0.119476	0.0817804	MDM2/GSN	2
GO:0051168	nuclear export	2/96	46/16374	0.0297896	0.119476	0.0817804	MDM2/TCF7L2	2
GO:0070997	neuron death	5/96	297/16374	0.0304957	0.121983	0.083496	NAMPT/FOXO3/CLU/BCL2/GRID2	5
GO:0010507	negative regulation of autophagy	2/96	47/16374	0.0309969	0.12236	0.0837545	NAMPT/BCL2	2
GO:0014909	smooth muscle cell migration	2/96	47/16374	0.0309969	0.12236	0.0837545	LPAR1/BCL2	2
GO:0030166	proteoglycan biosynthetic process	2/96	47/16374	0.0309969	0.12236	0.0837545	TCF7L2/BMPR1B	2
GO:0051781	positive regulation of cell division	2/96	47/16374	0.0309969	0.12236	0.0837545	PTN/FGFR2	2
GO:1904888	cranial skeletal system development	2/96	47/16374	0.0309969	0.12236	0.0837545	SH3PXD2B/FGFR2	2
GO:0002931	response to ischemia	2/96	49/16374	0.0334685	0.123493	0.0845296	SQSTM1/BCL2	2
GO:0022037	metencephalon development	2/96	49/16374	0.0334685	0.123493	0.0845296	LPAR1/PTN	2
GO:0048678	response to axon injury	2/96	49/16374	0.0334685	0.123493	0.0845296	MATN2/PTN	2
GO:0007035	vacuolar acidification	1/96	6/16374	0.0346713	0.123493	0.0845296	CLIC4	1
GO:0007185	transmembrane receptor protein tyrosine phosphatase signaling pathway	1/96	6/16374	0.0346713	0.123493	0.0845296	PTN	1
GO:0007196	adenylate cyclase-inhibiting G protein-coupled glutamate receptor signaling pathway	1/96	6/16374	0.0346713	0.123493	0.0845296	GRM3	1
GO:0010817	regulation of hormone levels	1/96	6/16374	0.0346713	0.123493	0.0845296	TCF7L2	1
GO:0010835	regulation of protein ADP-ribosylation	1/96	6/16374	0.0346713	0.123493	0.0845296	KAT2B	1
GO:0014012	peripheral nervous system axon regeneration	1/96	6/16374	0.0346713	0.123493	0.0845296	TNC	1
GO:0014719	skeletal muscle satellite cell activation	1/96	6/16374	0.0346713	0.123493	0.0845296	MEGF10	1
GO:0031223	auditory behavior	1/96	6/16374	0.0346713	0.123493	0.0845296	SLC1A3	1
GO:0038063	collagen-activated tyrosine kinase receptor signaling pathway	1/96	6/16374	0.0346713	0.123493	0.0845296	COL4A5	1
GO:0046578	regulation of Ras protein signal transduction	1/96	6/16374	0.0346713	0.123493	0.0845296	SQSTM1	1
GO:0048840	otolith development	1/96	6/16374	0.0346713	0.123493	0.0845296	LRIG1	1
GO:0051127	positive regulation of actin nucleation	1/96	6/16374	0.0346713	0.123493	0.0845296	GSN	1
GO:0051150	regulation of smooth muscle cell differentiation	1/96	6/16374	0.0346713	0.123493	0.0845296	FGFR2	1
GO:0051902	negative regulation of mitochondrial depolarization	1/96	6/16374	0.0346713	0.123493	0.0845296	BCL2	1
GO:0051938	L-glutamate import	1/96	6/16374	0.0346713	0.123493	0.0845296	SLC1A3	1
GO:0060215	primitive hemopoiesis	1/96	6/16374	0.0346713	0.123493	0.0845296	STK3	1
GO:0060335	positive regulation of interferon-gamma-mediated signaling pathway	1/96	6/16374	0.0346713	0.123493	0.0845296	PARP9	1
GO:0060526	prostate glandular acinus morphogenesis	1/96	6/16374	0.0346713	0.123493	0.0845296	FGFR2	1
GO:0060527	prostate epithelial cord arborization involved in prostate glandular acinus morphogenesis	1/96	6/16374	0.0346713	0.123493	0.0845296	FGFR2	1
GO:0060592	mammary gland formation	1/96	6/16374	0.0346713	0.123493	0.0845296	FGFR2	1
GO:0060601	lateral sprouting from an epithelium	1/96	6/16374	0.0346713	0.123493	0.0845296	FGFR2	1
GO:0060965	negative regulation of gene silencing by miRNA	1/96	6/16374	0.0346713	0.123493	0.0845296	NEAT1	1
GO:0061299	retina vasculature morphogenesis in camera-type eye	1/96	6/16374	0.0346713	0.123493	0.0845296	CLIC4	1
GO:0061518	microglial cell proliferation	1/96	6/16374	0.0346713	0.123493	0.0845296	CLU	1
GO:0070120	ciliary neurotrophic factor-mediated signaling pathway	1/96	6/16374	0.0346713	0.123493	0.0845296	LIFR	1
GO:0072307	regulation of metanephric nephron tubule epithelial cell differentiation	1/96	6/16374	0.0346713	0.123493	0.0845296	YAP1	1
GO:0097283	keratinocyte apoptotic process	1/96	6/16374	0.0346713	0.123493	0.0845296	GSN	1
GO:0098780	response to mitochondrial depolarisation	1/96	6/16374	0.0346713	0.123493	0.0845296	SQSTM1	1
GO:1900454	positive regulation of long-term synaptic depression	1/96	6/16374	0.0346713	0.123493	0.0845296	GRID2	1
GO:1901166	neural crest cell migration involved in autonomic nervous system development	1/96	6/16374	0.0346713	0.123493	0.0845296	FN1	1
GO:1902742	apoptotic process involved in development	1/96	6/16374	0.0346713	0.123493	0.0845296	MEGF10	1
GO:1902949	positive regulation of tau-protein kinase activity	1/96	6/16374	0.0346713	0.123493	0.0845296	CLU	1
GO:2000675	negative regulation of type B pancreatic cell apoptotic process	1/96	6/16374	0.0346713	0.123493	0.0845296	TCF7L2	1
GO:2000738	positive regulation of stem cell differentiation	1/96	6/16374	0.0346713	0.123493	0.0845296	PTN	1
GO:0021510	spinal cord development	2/96	50/16374	0.0347323	0.123493	0.0845296	DAAM2/PTN	2
GO:0021536	diencephalon development	2/96	50/16374	0.0347323	0.123493	0.0845296	SOX2/PTN	2
GO:0045600	positive regulation of fat cell differentiation	2/96	50/16374	0.0347323	0.123493	0.0845296	SH3PXD2B/STK3	2
GO:0051604	protein maturation	2/96	50/16374	0.0347323	0.123493	0.0845296	MDM2/LDLRAD3	2
GO:1903078	positive regulation of protein localization to plasma membrane	2/96	50/16374	0.0347323	0.123493	0.0845296	SQSTM1/DPP10	2
GO:0006417	regulation of translation	2/96	51/16374	0.0360146	0.12715	0.087033	FOXO3/QKI	2
GO:0006611	protein export from nucleus	2/96	51/16374	0.0360146	0.12715	0.087033	MDM2/TCF7L2	2
GO:0051496	positive regulation of stress fiber assembly	2/96	51/16374	0.0360146	0.12715	0.087033	LPAR1/SH3PXD2B	2
GO:0030217	T cell differentiation	3/96	124/16374	0.0364145	0.127172	0.0870479	BCL6/PREX1/ITPKB	3
GO:0072593	reactive oxygen species metabolic process	3/96	125/16374	0.0371559	0.127172	0.0870479	PDK4/FOXO3/BCL2	3
GO:0009953	dorsal/ventral pattern formation	2/96	52/16374	0.0373149	0.127172	0.0870479	BMPR1B/LRP4	2
GO:0051899	membrane depolarization	2/96	52/16374	0.0373149	0.127172	0.0870479	CAMK2D/BCL2	2
GO:0001525	angiogenesis	6/96	425/16374	0.0388211	0.127172	0.0870479	FN1/GLUL/SEMA6A/SASH1/PTN/FGFR2	6
GO:0048468	cell development	4/96	218/16374	0.0393394	0.127172	0.0870479	EFHD1/SLC1A3/NTM/MICALL2	4
GO:0045665	negative regulation of neuron differentiation	2/96	54/16374	0.0399689	0.127172	0.0870479	FOXO3/SOX2	2
GO:0001781	neutrophil apoptotic process	1/96	7/16374	0.0403331	0.127172	0.0870479	ITPKB	1
GO:0002385	mucosal immune response	1/96	7/16374	0.0403331	0.127172	0.0870479	OTUD7B	1
GO:0002903	negative regulation of B cell apoptotic process	1/96	7/16374	0.0403331	0.127172	0.0870479	BCL6	1
GO:0009649	entrainment of circadian clock	1/96	7/16374	0.0403331	0.127172	0.0870479	PHLPP1	1
GO:0010518	positive regulation of phospholipase activity	1/96	7/16374	0.0403331	0.127172	0.0870479	FGFR2	1
GO:0010837	regulation of keratinocyte proliferation	1/96	7/16374	0.0403331	0.127172	0.0870479	YAP1	1
GO:0021575	hindbrain morphogenesis	1/96	7/16374	0.0403331	0.127172	0.0870479	DLC1	1
GO:0021684	cerebellar granular layer formation	1/96	7/16374	0.0403331	0.127172	0.0870479	GRID2	1
GO:0021707	cerebellar granule cell differentiation	1/96	7/16374	0.0403331	0.127172	0.0870479	GRID2	1
GO:0021859	pyramidal neuron differentiation	1/96	7/16374	0.0403331	0.127172	0.0870479	FGFR2	1
GO:0021860	pyramidal neuron development	1/96	7/16374	0.0403331	0.127172	0.0870479	FGFR2	1
GO:0023041	neuronal signal transduction	1/96	7/16374	0.0403331	0.127172	0.0870479	CLU	1
GO:0030011	maintenance of cell polarity	1/96	7/16374	0.0403331	0.127172	0.0870479	DST	1
GO:0032291	axon ensheathment in central nervous system	1/96	7/16374	0.0403331	0.127172	0.0870479	CLU	1
GO:0032717	negative regulation of interleukin-8 production	1/96	7/16374	0.0403331	0.127172	0.0870479	OTUD7B	1
GO:0032762	mast cell cytokine production	1/96	7/16374	0.0403331	0.127172	0.0870479	BCL6	1
GO:0032808	lacrimal gland development	1/96	7/16374	0.0403331	0.127172	0.0870479	FGFR2	1
GO:0035726	common myeloid progenitor cell proliferation	1/96	7/16374	0.0403331	0.127172	0.0870479	ITPKB	1
GO:0040036	regulation of fibroblast growth factor receptor signaling pathway	1/96	7/16374	0.0403331	0.127172	0.0870479	FGFR2	1
GO:0043496	regulation of protein homodimerization activity	1/96	7/16374	0.0403331	0.127172	0.0870479	BCL2	1
GO:0043652	engulfment of apoptotic cell	1/96	7/16374	0.0403331	0.127172	0.0870479	MEGF10	1
GO:0043654	recognition of apoptotic cell	1/96	7/16374	0.0403331	0.127172	0.0870479	MEGF10	1
GO:0046600	negative regulation of centriole replication	1/96	7/16374	0.0403331	0.127172	0.0870479	KAT2B	1
GO:0048368	lateral mesoderm development	1/96	7/16374	0.0403331	0.127172	0.0870479	YAP1	1
GO:0051124	synaptic growth at neuromuscular junction	1/96	7/16374	0.0403331	0.127172	0.0870479	LRP4	1
GO:0051452	intracellular pH reduction	1/96	7/16374	0.0403331	0.127172	0.0870479	BCL2	1
GO:0060462	lung lobe development	1/96	7/16374	0.0403331	0.127172	0.0870479	FGFR2	1
GO:0060463	lung lobe morphogenesis	1/96	7/16374	0.0403331	0.127172	0.0870479	FGFR2	1
GO:0060572	morphogenesis of an epithelial bud	1/96	7/16374	0.0403331	0.127172	0.0870479	FGFR2	1
GO:0060687	regulation of branching involved in prostate gland morphogenesis	1/96	7/16374	0.0403331	0.127172	0.0870479	FGFR2	1
GO:0060706	cell differentiation involved in embryonic placenta development	1/96	7/16374	0.0403331	0.127172	0.0870479	STK3	1
GO:0061318	renal filtration cell differentiation	1/96	7/16374	0.0403331	0.127172	0.0870479	MYO1E	1
GO:0071472	cellular response to salt stress	1/96	7/16374	0.0403331	0.127172	0.0870479	EFHD1	1
GO:0071475	cellular hyperosmotic salinity response	1/96	7/16374	0.0403331	0.127172	0.0870479	EFHD1	1
GO:0071494	cellular response to UV-C	1/96	7/16374	0.0403331	0.127172	0.0870479	MDM2	1
GO:0071864	positive regulation of cell proliferation in bone marrow	1/96	7/16374	0.0403331	0.127172	0.0870479	FGFR2	1
GO:0072091	regulation of stem cell proliferation	1/96	7/16374	0.0403331	0.127172	0.0870479	YAP1	1
GO:0072257	metanephric nephron tubule epithelial cell differentiation	1/96	7/16374	0.0403331	0.127172	0.0870479	YAP1	1
GO:0150094	amyloid-beta clearance by cellular catabolic process	1/96	7/16374	0.0403331	0.127172	0.0870479	LRP4	1
GO:1900744	regulation of p38MAPK cascade	1/96	7/16374	0.0403331	0.127172	0.0870479	PHLPP1	1
GO:1902459	positive regulation of stem cell population maintenance	1/96	7/16374	0.0403331	0.127172	0.0870479	YAP1	1
GO:1902514	regulation of calcium ion transmembrane transport via high voltage-gated calcium channel	1/96	7/16374	0.0403331	0.127172	0.0870479	CAMK2D	1
GO:2000650	negative regulation of sodium ion transmembrane transporter activity	1/96	7/16374	0.0403331	0.127172	0.0870479	CAMK2D	1
GO:2001269	positive regulation of cysteine-type endopeptidase activity involved in apoptotic signaling pathway	1/96	7/16374	0.0403331	0.127172	0.0870479	GSN	1
GO:0007017	microtubule-based process	2/96	55/16374	0.0413221	0.130018	0.0889959	PHLDB1/TUBB2B	2
GO:0048869	cellular developmental process	4/96	222/16374	0.0415987	0.130615	0.0894044	SOX2/BMPR1B/ERBB4/FGFR2	4
GO:0071346	cellular response to interferon-gamma	3/96	131/16374	0.0417664	0.130868	0.0895779	CAMK2D/CD44/GSN	3
GO:0007169	transmembrane receptor protein tyrosine kinase signaling pathway	4/96	223/16374	0.0421748	0.131599	0.0900785	SEMA6A/ERBB4/KANK1/FGFR2	4
GO:0065003	protein-containing complex assembly	4/96	223/16374	0.0421748	0.131599	0.0900785	MDM2/YAP1/GSN/GFAP	4
GO:0001836	release of cytochrome c from mitochondria	2/96	56/16374	0.0426924	0.132174	0.0904716	CLU/BCL2	2
GO:0097190	apoptotic signaling pathway	4/96	226/16374	0.0439303	0.132174	0.0904716	YAP1/CLU/TCF7L2/BCL2	4
GO:0031016	pancreas development	2/96	57/16374	0.0440796	0.132174	0.0904716	TCF7L2/MEIS2	2
GO:0048661	positive regulation of smooth muscle cell proliferation	2/96	57/16374	0.0440796	0.132174	0.0904716	NAMPT/FGFR2	2
GO:0060562	epithelial tube morphogenesis	2/96	57/16374	0.0440796	0.132174	0.0904716	CLIC4/FGFR2	2
GO:0021549	cerebellum development	2/96	58/16374	0.0454834	0.132174	0.0904716	LPAR1/PTN	2
GO:0030593	neutrophil chemotaxis	2/96	58/16374	0.0454834	0.132174	0.0904716	PDE4B/PREX1	2
GO:0035249	synaptic transmission, glutamatergic	2/96	58/16374	0.0454834	0.132174	0.0904716	GLUL/GRID2	2
GO:0001714	endodermal cell fate specification	1/96	8/16374	0.045962	0.132174	0.0904716	SOX2	1
GO:0001841	neural tube formation	1/96	8/16374	0.045962	0.132174	0.0904716	STK3	1
GO:0001959	regulation of cytokine-mediated signaling pathway	1/96	8/16374	0.045962	0.132174	0.0904716	LIFR	1
GO:0003157	endocardium development	1/96	8/16374	0.045962	0.132174	0.0904716	STK3	1
GO:0010421	hydrogen peroxide-mediated programmed cell death	1/96	8/16374	0.045962	0.132174	0.0904716	FOXO3	1
GO:0010510	regulation of acetyl-CoA biosynthetic process from pyruvate	1/96	8/16374	0.045962	0.132174	0.0904716	PDK4	1
GO:0021548	pons development	1/96	8/16374	0.045962	0.132174	0.0904716	BCL2	1
GO:0030916	otic vesicle formation	1/96	8/16374	0.045962	0.132174	0.0904716	FGFR2	1
GO:0031666	positive regulation of lipopolysaccharide-mediated signaling pathway	1/96	8/16374	0.045962	0.132174	0.0904716	SASH1	1
GO:0035881	amacrine cell differentiation	1/96	8/16374	0.045962	0.132174	0.0904716	RORB	1
GO:0043497	regulation of protein heterodimerization activity	1/96	8/16374	0.045962	0.132174	0.0904716	BCL2	1
GO:0045851	pH reduction	1/96	8/16374	0.045962	0.132174	0.0904716	BCL2	1
GO:0046548	retinal rod cell development	1/96	8/16374	0.045962	0.132174	0.0904716	RORB	1
GO:0050847	progesterone receptor signaling pathway	1/96	8/16374	0.045962	0.132174	0.0904716	YAP1	1
GO:0051014	actin filament severing	1/96	8/16374	0.045962	0.132174	0.0904716	GSN	1
GO:0051593	response to folic acid	1/96	8/16374	0.045962	0.132174	0.0904716	GSN	1
GO:0060242	contact inhibition	1/96	8/16374	0.045962	0.132174	0.0904716	YAP1	1
GO:0060253	negative regulation of glial cell proliferation	1/96	8/16374	0.045962	0.132174	0.0904716	PTN	1
GO:0060484	lung-associated mesenchyme development	1/96	8/16374	0.045962	0.132174	0.0904716	FGFR2	1
GO:0070613	regulation of protein processing	1/96	8/16374	0.045962	0.132174	0.0904716	LDLRAD3	1
GO:0071312	cellular response to alkaloid	1/96	8/16374	0.045962	0.132174	0.0904716	MDM2	1
GO:0072015	glomerular visceral epithelial cell development	1/96	8/16374	0.045962	0.132174	0.0904716	MYO1E	1
GO:0072311	glomerular epithelial cell differentiation	1/96	8/16374	0.045962	0.132174	0.0904716	MYO1E	1
GO:0090650	cellular response to oxygen-glucose deprivation	1/96	8/16374	0.045962	0.132174	0.0904716	NAMPT	1
GO:0090715	immunological memory formation process	1/96	8/16374	0.045962	0.132174	0.0904716	BCL6	1
GO:0097105	presynaptic membrane assembly	1/96	8/16374	0.045962	0.132174	0.0904716	LRP4	1
GO:0098909	regulation of cardiac muscle cell action potential involved in regulation of contraction	1/96	8/16374	0.045962	0.132174	0.0904716	CAMK2D	1
GO:1900119	positive regulation of execution phase of apoptosis	1/96	8/16374	0.045962	0.132174	0.0904716	DLC1	1
GO:1900747	negative regulation of vascular endothelial growth factor signaling pathway	1/96	8/16374	0.045962	0.132174	0.0904716	SEMA6A	1
GO:1901844	regulation of cell communication by electrical coupling involved in cardiac conduction	1/96	8/16374	0.045962	0.132174	0.0904716	CAMK2D	1
GO:1903115	regulation of actin filament-based movement	1/96	8/16374	0.045962	0.132174	0.0904716	CAMK2D	1
GO:2000177	regulation of neural precursor cell proliferation	1/96	8/16374	0.045962	0.132174	0.0904716	FOXO3	1
GO:2000347	positive regulation of hepatocyte proliferation	1/96	8/16374	0.045962	0.132174	0.0904716	PTN	1
GO:0032436	positive regulation of proteasomal ubiquitin-dependent protein catabolic process	2/96	59/16374	0.0469037	0.134368	0.0919735	MDM2/CLU	2
GO:0043583	ear development	2/96	59/16374	0.0469037	0.134368	0.0919735	SOX2/BCL2	2
GO:0007605	sensory perception of sound	3/96	138/16374	0.0474921	0.135795	0.0929504	NAV2/LRIG1/SLC1A3	3
GO:0001764	neuron migration	3/96	141/16374	0.0500586	0.138224	0.0946128	MATN2/ERBB4/TUBB2B	3
GO:0033554	cellular response to stress	4/96	237/16374	0.0507158	0.138224	0.0946128	CAMK2D/NAMPT/CLU/BCL6	4
GO:0003206	cardiac chamber morphogenesis	2/96	62/16374	0.0512604	0.138224	0.0946128	MDM2/FGFR2	2
GO:0009267	cellular response to starvation	2/96	62/16374	0.0512604	0.138224	0.0946128	PDK4/GLUL	2
GO:0090398	cellular senescence	2/96	62/16374	0.0512604	0.138224	0.0946128	NAMPT/BCL6	2
GO:0098662	inorganic cation transmembrane transport	2/96	62/16374	0.0512604	0.138224	0.0946128	CAMK2D/DPP10	2
GO:0001542	ovulation from ovarian follicle	1/96	9/16374	0.0515582	0.138224	0.0946128	FOXO3	1
GO:0003254	regulation of membrane depolarization	1/96	9/16374	0.0515582	0.138224	0.0946128	CAMK2D	1
GO:0008090	retrograde axonal transport	1/96	9/16374	0.0515582	0.138224	0.0946128	DST	1
GO:0010224	response to UV-B	1/96	9/16374	0.0515582	0.138224	0.0946128	BCL2	1
GO:0014816	skeletal muscle satellite cell differentiation	1/96	9/16374	0.0515582	0.138224	0.0946128	MEGF10	1
GO:0021889	olfactory bulb interneuron differentiation	1/96	9/16374	0.0515582	0.138224	0.0946128	ERBB4	1
GO:0030857	negative regulation of epithelial cell differentiation	1/96	9/16374	0.0515582	0.138224	0.0946128	YAP1	1
GO:0032463	negative regulation of protein homooligomerization	1/96	9/16374	0.0515582	0.138224	0.0946128	CLU	1
GO:0032836	glomerular basement membrane development	1/96	9/16374	0.0515582	0.138224	0.0946128	MYO1E	1
GO:0033689	negative regulation of osteoblast proliferation	1/96	9/16374	0.0515582	0.138224	0.0946128	BCL2	1
GO:0035973	aggrephagy	1/96	9/16374	0.0515582	0.138224	0.0946128	SQSTM1	1
GO:0042355	L-fucose catabolic process	1/96	9/16374	0.0515582	0.138224	0.0946128	FUT9	1
GO:0043281	regulation of cysteine-type endopeptidase activity involved in apoptotic process	1/96	9/16374	0.0515582	0.138224	0.0946128	SOX2	1
GO:0043379	memory T cell differentiation	1/96	9/16374	0.0515582	0.138224	0.0946128	BCL6	1
GO:0043653	mitochondrial fragmentation involved in apoptotic process	1/96	9/16374	0.0515582	0.138224	0.0946128	ERBB4	1
GO:0045124	regulation of bone resorption	1/96	9/16374	0.0515582	0.138224	0.0946128	PDK4	1
GO:0046621	negative regulation of organ growth	1/96	9/16374	0.0515582	0.138224	0.0946128	STK3	1
GO:0050931	pigment cell differentiation	1/96	9/16374	0.0515582	0.138224	0.0946128	BCL2	1
GO:0051451	myoblast migration	1/96	9/16374	0.0515582	0.138224	0.0946128	MEGF10	1
GO:0051668	localization within membrane	1/96	9/16374	0.0515582	0.138224	0.0946128	GSN	1
GO:0060487	lung epithelial cell differentiation	1/96	9/16374	0.0515582	0.138224	0.0946128	YAP1	1
GO:0060502	epithelial cell proliferation involved in lung morphogenesis	1/96	9/16374	0.0515582	0.138224	0.0946128	FGFR2	1
GO:0060907	positive regulation of macrophage cytokine production	1/96	9/16374	0.0515582	0.138224	0.0946128	GPRC5B	1
GO:0071600	otic vesicle morphogenesis	1/96	9/16374	0.0515582	0.138224	0.0946128	FGFR2	1
GO:0071670	smooth muscle cell chemotaxis	1/96	9/16374	0.0515582	0.138224	0.0946128	LPAR1	1
GO:0097104	postsynaptic membrane assembly	1/96	9/16374	0.0515582	0.138224	0.0946128	LRP4	1
GO:0098696	regulation of neurotransmitter receptor localization to postsynaptic specialization membrane	1/96	9/16374	0.0515582	0.138224	0.0946128	GPC6	1
GO:0099633	protein localization to postsynaptic specialization membrane	1/96	9/16374	0.0515582	0.138224	0.0946128	GPC6	1
GO:1903671	negative regulation of sprouting angiogenesis	1/96	9/16374	0.0515582	0.138224	0.0946128	SEMA6A	1
GO:0001523	retinoid metabolic process	2/96	63/16374	0.0527438	0.1409	0.0964447	GPC6/GPC5	2
GO:0042531	positive regulation of tyrosine phosphorylation of STAT protein	2/96	63/16374	0.0527438	0.1409	0.0964447	PARP9/ERBB4	2
GO:0030334	regulation of cell migration	2/96	64/16374	0.0542425	0.143834	0.0984527	SGK3/ERBB4	2
GO:0048545	response to steroid hormone	2/96	64/16374	0.0542425	0.143834	0.0984527	MDM2/RORB	2
GO:0061919	process utilizing autophagic mechanism	3/96	147/16374	0.0553907	0.143834	0.0984527	NAMPT/FOXO3/BCL2	3
GO:0043154	negative regulation of cysteine-type endopeptidase activity involved in apoptotic process	2/96	65/16374	0.0557563	0.143834	0.0984527	MDM2/CD44	2
GO:0007249	I-kappaB kinase/NF-kappaB signaling	4/96	245/16374	0.0559932	0.143834	0.0984527	SQSTM1/GPRC5B/LPAR1/OTUD7B	4
GO:0071495	cellular response to endogenous stimulus	4/96	245/16374	0.0559932	0.143834	0.0984527	FERMT2/BMPR1B/LRP4/FGFR2	4
GO:0001768	establishment of T cell polarity	1/96	10/16374	0.0571219	0.143834	0.0984527	GSN	1
GO:0001886	endothelial cell morphogenesis	1/96	10/16374	0.0571219	0.143834	0.0984527	CLIC4	1
GO:0001952	regulation of cell-matrix adhesion	1/96	10/16374	0.0571219	0.143834	0.0984527	BCL2	1
GO:0002292	T cell differentiation involved in immune response	1/96	10/16374	0.0571219	0.143834	0.0984527	BCL6	1
GO:0003149	membranous septum morphogenesis	1/96	10/16374	0.0571219	0.143834	0.0984527	FGFR2	1
GO:0006198	cAMP catabolic process	1/96	10/16374	0.0571219	0.143834	0.0984527	PDE4B	1
GO:0010470	regulation of gastrulation	1/96	10/16374	0.0571219	0.143834	0.0984527	PHLDB1	1
GO:0032464	positive regulation of protein homooligomerization	1/96	10/16374	0.0571219	0.143834	0.0984527	CLU	1
GO:0032957	inositol trisphosphate metabolic process	1/96	10/16374	0.0571219	0.143834	0.0984527	ITPKB	1
GO:0035871	protein K11-linked deubiquitination	1/96	10/16374	0.0571219	0.143834	0.0984527	OTUD7B	1
GO:0035878	nail development	1/96	10/16374	0.0571219	0.143834	0.0984527	ITGB4	1
GO:0042304	regulation of fatty acid biosynthetic process	1/96	10/16374	0.0571219	0.143834	0.0984527	PDK4	1
GO:0042538	hyperosmotic salinity response	1/96	10/16374	0.0571219	0.143834	0.0984527	EFHD1	1
GO:0042670	retinal cone cell differentiation	1/96	10/16374	0.0571219	0.143834	0.0984527	RORB	1
GO:0046549	retinal cone cell development	1/96	10/16374	0.0571219	0.143834	0.0984527	RORB	1
GO:0046638	positive regulation of alpha-beta T cell differentiation	1/96	10/16374	0.0571219	0.143834	0.0984527	ITPKB	1
GO:0048339	paraxial mesoderm development	1/96	10/16374	0.0571219	0.143834	0.0984527	YAP1	1
GO:0048660	regulation of smooth muscle cell proliferation	1/96	10/16374	0.0571219	0.143834	0.0984527	TCF7L2	1
GO:0048755	branching morphogenesis of a nerve	1/96	10/16374	0.0571219	0.143834	0.0984527	FGFR2	1
GO:0051272	positive regulation of cellular component movement	1/96	10/16374	0.0571219	0.143834	0.0984527	BCL6	1
GO:0060442	branching involved in prostate gland morphogenesis	1/96	10/16374	0.0571219	0.143834	0.0984527	FGFR2	1
GO:0061635	regulation of protein complex stability	1/96	10/16374	0.0571219	0.143834	0.0984527	SQSTM1	1
GO:0071548	response to dexamethasone	1/96	10/16374	0.0571219	0.143834	0.0984527	FOXO3	1
GO:0090136	epithelial cell-cell adhesion	1/96	10/16374	0.0571219	0.143834	0.0984527	CTNNA1	1
GO:0097050	type B pancreatic cell apoptotic process	1/96	10/16374	0.0571219	0.143834	0.0984527	TCF7L2	1
GO:0099068	postsynapse assembly	1/96	10/16374	0.0571219	0.143834	0.0984527	LRP4	1
GO:0001558	regulation of cell growth	2/96	66/16374	0.0572848	0.143834	0.0984527	CAMK2D/SGK3	2
GO:0007044	cell-substrate junction assembly	2/96	66/16374	0.0572848	0.143834	0.0984527	FN1/DLC1	2
GO:0035019	somatic stem cell population maintenance	2/96	66/16374	0.0572848	0.143834	0.0984527	YAP1/SOX2	2
GO:0042100	B cell proliferation	2/96	66/16374	0.0572848	0.143834	0.0984527	BCL6/BCL2	2
GO:0006909	phagocytosis	3/96	150/16374	0.0581549	0.145775	0.0997815	GSN/DOCK1/MEGF10	3
GO:0032092	positive regulation of protein binding	2/96	67/16374	0.0588279	0.146972	0.100601	STK3/TCF7L2	2
GO:1904019	epithelial cell apoptotic process	2/96	67/16374	0.0588279	0.146972	0.100601	FOXO3/TCF7L2	2
GO:0001501	skeletal system development	4/96	250/16374	0.059437	0.148161	0.101415	CD44/SH3PXD2B/BMPR1B/FGFR2	4
GO:0044248	cellular catabolic process	3/96	152/16374	0.0600334	0.148161	0.101415	NAMPT/FOXO3/BCL2	3
GO:0071772	response to BMP	2/96	68/16374	0.0603853	0.148161	0.101415	BMPR1B/LRP4	2
GO:0097193	intrinsic apoptotic signaling pathway	3/96	153/16374	0.0609834	0.148161	0.101415	MDM2/CLU/BCL2	3
GO:0051865	protein autoubiquitination	2/96	69/16374	0.0619569	0.148161	0.101415	MDM2/SASH1	2
GO:1902476	chloride transmembrane transport	2/96	69/16374	0.0619569	0.148161	0.101415	CLIC4/SLC1A3	2
GO:0001780	neutrophil homeostasis	1/96	11/16374	0.0626533	0.148161	0.101415	PDE4B	1
GO:0006582	melanin metabolic process	1/96	11/16374	0.0626533	0.148161	0.101415	BCL2	1
GO:0006707	cholesterol catabolic process	1/96	11/16374	0.0626533	0.148161	0.101415	CYP27A1	1
GO:0014841	skeletal muscle satellite cell proliferation	1/96	11/16374	0.0626533	0.148161	0.101415	MEGF10	1
GO:0016264	gap junction assembly	1/96	11/16374	0.0626533	0.148161	0.101415	CTNNA1	1
GO:0021984	adenohypophysis development	1/96	11/16374	0.0626533	0.148161	0.101415	SOX2	1
GO:0031581	hemidesmosome assembly	1/96	11/16374	0.0626533	0.148161	0.101415	ITGB4	1
GO:0032060	bleb assembly	1/96	11/16374	0.0626533	0.148161	0.101415	LPAR1	1
GO:0032780	negative regulation of ATPase activity	1/96	11/16374	0.0626533	0.148161	0.101415	CNN3	1
GO:0033148	positive regulation of intracellular estrogen receptor signaling pathway	1/96	11/16374	0.0626533	0.148161	0.101415	YAP1	1
GO:0035107	appendage morphogenesis	1/96	11/16374	0.0626533	0.148161	0.101415	FGFR2	1
GO:0042698	ovulation cycle	1/96	11/16374	0.0626533	0.148161	0.101415	BMPR1B	1
GO:0043374	CD8-positive, alpha-beta T cell differentiation	1/96	11/16374	0.0626533	0.148161	0.101415	BCL2	1
GO:0045059	positive thymic T cell selection	1/96	11/16374	0.0626533	0.148161	0.101415	ITPKB	1
GO:0045591	positive regulation of regulatory T cell differentiation	1/96	11/16374	0.0626533	0.148161	0.101415	BCL6	1
GO:0045667	regulation of osteoblast differentiation	1/96	11/16374	0.0626533	0.148161	0.101415	FGFR2	1
GO:0046902	regulation of mitochondrial membrane permeability	1/96	11/16374	0.0626533	0.148161	0.101415	BCL2	1
GO:0051453	regulation of intracellular pH	1/96	11/16374	0.0626533	0.148161	0.101415	BCL2	1
GO:0060174	limb bud formation	1/96	11/16374	0.0626533	0.148161	0.101415	FGFR2	1
GO:0071236	cellular response to antibiotic	1/96	11/16374	0.0626533	0.148161	0.101415	CLU	1
GO:0098712	L-glutamate import across plasma membrane	1/96	11/16374	0.0626533	0.148161	0.101415	SLC1A3	1
GO:0099151	regulation of postsynaptic density assembly	1/96	11/16374	0.0626533	0.148161	0.101415	GRID2	1
GO:1902004	positive regulation of amyloid-beta formation	1/96	11/16374	0.0626533	0.148161	0.101415	CLU	1
GO:1903428	positive regulation of reactive oxygen species biosynthetic process	1/96	11/16374	0.0626533	0.148161	0.101415	FOXO3	1
GO:1904861	excitatory synapse assembly	1/96	11/16374	0.0626533	0.148161	0.101415	GRID2	1
GO:1990089	response to nerve growth factor	1/96	11/16374	0.0626533	0.148161	0.101415	PTN	1
GO:2001223	negative regulation of neuron migration	1/96	11/16374	0.0626533	0.148161	0.101415	ERBB4	1
GO:2001241	positive regulation of extrinsic apoptotic signaling pathway in absence of ligand	1/96	11/16374	0.0626533	0.148161	0.101415	CTNNA1	1
GO:0002040	sprouting angiogenesis	2/96	71/16374	0.0651416	0.153408	0.105006	GLUL/SEMA6A	2
GO:0060326	cell chemotaxis	2/96	71/16374	0.0651416	0.153408	0.105006	LPAR1/PTN	2
GO:0016049	cell growth	4/96	258/16374	0.065178	0.153408	0.105006	CAMK2D/SGK3/BCL6/BCL2	4
GO:0030855	epithelial cell differentiation	3/96	158/16374	0.0658385	0.153728	0.105225	YAP1/CNN3/FGFR2	3
GO:0000423	mitophagy	1/96	12/16374	0.0681527	0.153728	0.105225	SQSTM1	1
GO:0002690	positive regulation of leukocyte chemotaxis	1/96	12/16374	0.0681527	0.153728	0.105225	PTN	1
GO:0003143	embryonic heart tube morphogenesis	1/96	12/16374	0.0681527	0.153728	0.105225	YAP1	1
GO:0006069	ethanol oxidation	1/96	12/16374	0.0681527	0.153728	0.105225	ACSS1	1
GO:0006086	acetyl-CoA biosynthetic process from pyruvate	1/96	12/16374	0.0681527	0.153728	0.105225	PDK4	1
GO:0006390	mitochondrial transcription	1/96	12/16374	0.0681527	0.153728	0.105225	FOXO3	1
GO:0006885	regulation of pH	1/96	12/16374	0.0681527	0.153728	0.105225	PDK4	1
GO:0010092	specification of animal organ identity	1/96	12/16374	0.0681527	0.153728	0.105225	FGFR2	1
GO:0014904	myotube cell development	1/96	12/16374	0.0681527	0.153728	0.105225	BCL2	1
GO:0018394	peptidyl-lysine acetylation	1/96	12/16374	0.0681527	0.153728	0.105225	KAT2B	1
GO:0021794	thalamus development	1/96	12/16374	0.0681527	0.153728	0.105225	PTN	1
GO:0030833	regulation of actin filament polymerization	1/96	12/16374	0.0681527	0.153728	0.105225	PREX1	1
GO:0030903	notochord development	1/96	12/16374	0.0681527	0.153728	0.105225	YAP1	1
GO:0031065	positive regulation of histone deacetylation	1/96	12/16374	0.0681527	0.153728	0.105225	BCL6	1
GO:0032026	response to magnesium ion	1/96	12/16374	0.0681527	0.153728	0.105225	MDM2	1
GO:0036037	CD8-positive, alpha-beta T cell activation	1/96	12/16374	0.0681527	0.153728	0.105225	BCL2	1
GO:0042303	molting cycle	1/96	12/16374	0.0681527	0.153728	0.105225	LRIG1	1
GO:0046949	fatty-acyl-CoA biosynthetic process	1/96	12/16374	0.0681527	0.153728	0.105225	SCD5	1
GO:0060670	branching involved in labyrinthine layer morphogenesis	1/96	12/16374	0.0681527	0.153728	0.105225	FGFR2	1
GO:0061458	reproductive system development	1/96	12/16374	0.0681527	0.153728	0.105225	FGFR2	1
GO:0071474	cellular hyperosmotic response	1/96	12/16374	0.0681527	0.153728	0.105225	EFHD1	1
GO:0099645	neurotransmitter receptor localization to postsynaptic specialization membrane	1/96	12/16374	0.0681527	0.153728	0.105225	GPC6	1
GO:1900272	negative regulation of long-term synaptic potentiation	1/96	12/16374	0.0681527	0.153728	0.105225	PTN	1
GO:1902430	negative regulation of amyloid-beta formation	1/96	12/16374	0.0681527	0.153728	0.105225	CLU	1
GO:2000036	regulation of stem cell population maintenance	1/96	12/16374	0.0681527	0.153728	0.105225	PTN	1
GO:2000146	negative regulation of cell motility	1/96	12/16374	0.0681527	0.153728	0.105225	CTNNA1	1
GO:0043085	positive regulation of catalytic activity	2/96	73/16374	0.0683803	0.153728	0.105225	SH3PXD2B/BCL2	2
GO:0060291	long-term synaptic potentiation	2/96	73/16374	0.0683803	0.153728	0.105225	SQSTM1/PTN	2
GO:0061448	connective tissue development	2/96	73/16374	0.0683803	0.153728	0.105225	CD44/SH3PXD2B	2
GO:0019827	stem cell population maintenance	2/96	74/16374	0.0700193	0.156943	0.107426	YAP1/PTN	2
GO:0050729	positive regulation of inflammatory response	2/96	74/16374	0.0700193	0.156943	0.107426	NEAT1/GPRC5B	2
GO:1901137	carbohydrate derivative biosynthetic process	2/96	75/16374	0.0716712	0.158859	0.108737	FUT9/BCL2	2
GO:0007260	tyrosine phosphorylation of STAT protein	2/96	76/16374	0.0733358	0.158859	0.108737	PARP9/ERBB4	2
GO:0009749	response to glucose	2/96	76/16374	0.0733358	0.158859	0.108737	GLUL/TCF7L2	2
GO:0001711	endodermal cell fate commitment	1/96	13/16374	0.07362	0.158859	0.108737	SOX2	1
GO:0003230	cardiac atrium development	1/96	13/16374	0.07362	0.158859	0.108737	MDM2	1
GO:0010666	positive regulation of cardiac muscle cell apoptotic process	1/96	13/16374	0.07362	0.158859	0.108737	CAMK2D	1
GO:0022409	positive regulation of cell-cell adhesion	1/96	13/16374	0.07362	0.158859	0.108737	SOX2	1
GO:0030048	actin filament-based movement	1/96	13/16374	0.07362	0.158859	0.108737	MYO1E	1
GO:0030201	heparan sulfate proteoglycan metabolic process	1/96	13/16374	0.07362	0.158859	0.108737	TCF7L2	1
GO:0030837	negative regulation of actin filament polymerization	1/96	13/16374	0.07362	0.158859	0.108737	KANK1	1
GO:0034214	protein hexamerization	1/96	13/16374	0.07362	0.158859	0.108737	MAT2A	1
GO:0035563	positive regulation of chromatin binding	1/96	13/16374	0.07362	0.158859	0.108737	PARP9	1
GO:0043951	negative regulation of cAMP-mediated signaling	1/96	13/16374	0.07362	0.158859	0.108737	LPAR1	1
GO:0043970	histone H3-K9 acetylation	1/96	13/16374	0.07362	0.158859	0.108737	KAT2B	1
GO:0044130	obsolete negative regulation of growth of symbiont in host	1/96	13/16374	0.07362	0.158859	0.108737	SQSTM1	1
GO:0044281	small molecule metabolic process	1/96	13/16374	0.07362	0.158859	0.108737	PDK4	1
GO:0045778	positive regulation of ossification	1/96	13/16374	0.07362	0.158859	0.108737	PTN	1
GO:0048715	negative regulation of oligodendrocyte differentiation	1/96	13/16374	0.07362	0.158859	0.108737	DAAM2	1
GO:0051788	response to misfolded protein	1/96	13/16374	0.07362	0.158859	0.108737	CLU	1
GO:0060219	camera-type eye photoreceptor cell differentiation	1/96	13/16374	0.07362	0.158859	0.108737	RORB	1
GO:0060644	mammary gland epithelial cell differentiation	1/96	13/16374	0.07362	0.158859	0.108737	ERBB4	1
GO:0061298	retina vasculature development in camera-type eye	1/96	13/16374	0.07362	0.158859	0.108737	CLIC4	1
GO:0061577	calcium ion transmembrane transport via high voltage-gated calcium channel	1/96	13/16374	0.07362	0.158859	0.108737	CAMK2D	1
GO:0071872	cellular response to epinephrine stimulus	1/96	13/16374	0.07362	0.158859	0.108737	PDE4B	1
GO:1900025	negative regulation of substrate adhesion-dependent cell spreading	1/96	13/16374	0.07362	0.158859	0.108737	KANK1	1
GO:2001034	positive regulation of double-strand break repair via nonhomologous end joining	1/96	13/16374	0.07362	0.158859	0.108737	PARP9	1
GO:0000278	mitotic cell cycle	3/96	166/16374	0.073964	0.159372	0.109089	MDM2/MEIS2/FBXL7	3
GO:0022617	extracellular matrix disassembly	2/96	77/16374	0.0750129	0.16117	0.11032	CD44/SH3PXD2B	2
GO:0045666	positive regulation of neuron differentiation	2/96	77/16374	0.0750129	0.16117	0.11032	GPRC5B/BCL6	2
GO:0008285	negative regulation of cell population proliferation	5/96	388/16374	0.077871	0.165599	0.113351	KAT2B/STK3/DLC1/BCL6/ERBB4	5
GO:0007267	cell-cell signaling	5/96	389/16374	0.0785355	0.165599	0.113351	NAMPT/FERMT2/DAAM2/LRP4/FGFR2	5
GO:0001921	positive regulation of receptor recycling	1/96	14/16374	0.0790557	0.165599	0.113351	EPS15	1
GO:0003416	endochondral bone growth	1/96	14/16374	0.0790557	0.165599	0.113351	FGFR2	1
GO:0010821	regulation of mitochondrion organization	1/96	14/16374	0.0790557	0.165599	0.113351	SQSTM1	1
GO:0010952	positive regulation of peptidase activity	1/96	14/16374	0.0790557	0.165599	0.113351	FN1	1
GO:0021545	cranial nerve development	1/96	14/16374	0.0790557	0.165599	0.113351	SLC1A3	1
GO:0032743	positive regulation of interleukin-2 production	1/96	14/16374	0.0790557	0.165599	0.113351	PDE4B	1
GO:0045064	T-helper 2 cell differentiation	1/96	14/16374	0.0790557	0.165599	0.113351	BCL6	1
GO:0051016	barbed-end actin filament capping	1/96	14/16374	0.0790557	0.165599	0.113351	GSN	1
GO:0051770	positive regulation of nitric-oxide synthase biosynthetic process	1/96	14/16374	0.0790557	0.165599	0.113351	NAMPT	1
GO:0071391	cellular response to estrogen stimulus	1/96	14/16374	0.0790557	0.165599	0.113351	MDM2	1
GO:0072112	glomerular visceral epithelial cell differentiation	1/96	14/16374	0.0790557	0.165599	0.113351	MYO1E	1
GO:0072575	epithelial cell proliferation involved in liver morphogenesis	1/96	14/16374	0.0790557	0.165599	0.113351	PTN	1
GO:0090505	epiboly involved in wound healing	1/96	14/16374	0.0790557	0.165599	0.113351	CD44	1
GO:0098884	postsynaptic neurotransmitter receptor internalization	1/96	14/16374	0.0790557	0.165599	0.113351	EPS15	1
GO:1900006	positive regulation of dendrite development	1/96	14/16374	0.0790557	0.165599	0.113351	PTN	1
GO:1902570	protein localization to nucleolus	1/96	14/16374	0.0790557	0.165599	0.113351	GLUL	1
GO:0030182	neuron differentiation	4/96	277/16374	0.0799307	0.167199	0.114446	FOXO3/SOX2/GPRC5B/BCL6	4
GO:0016525	negative regulation of angiogenesis	2/96	80/16374	0.0801168	0.167352	0.114551	SEMA6A/PTN	2
GO:0006367	transcription initiation from RNA polymerase II promoter	3/96	172/16374	0.0803378	0.167352	0.114551	YAP1/KAT2B/RORB	3
GO:0070374	positive regulation of ERK1 and ERK2 cascade	3/96	172/16374	0.0803378	0.167352	0.114551	CD44/ERBB4/FGFR2	3
GO:0061024	membrane organization	3/96	173/16374	0.0814228	0.16937	0.115932	EPS15/FNBP1/LRP4	3
GO:0006338	chromatin remodeling	2/96	81/16374	0.0818418	0.16937	0.115932	KAT2B/BAZ2B	2
GO:0006839	mitochondrial transport	2/96	82/16374	0.0835782	0.16937	0.115932	BCL2/MICALL2	2
GO:0009101	glycoprotein biosynthetic process	2/96	82/16374	0.0835782	0.16937	0.115932	FUT9/BCL2	2
GO:0030183	B cell differentiation	2/96	82/16374	0.0835782	0.16937	0.115932	BCL6/BCL2	2
GO:0033138	positive regulation of peptidyl-serine phosphorylation	2/96	82/16374	0.0835782	0.16937	0.115932	CD44/BCL2	2
GO:0040011	locomotion	2/96	82/16374	0.0835782	0.16937	0.115932	CTNNA1/ERBB4	2
GO:0050731	positive regulation of peptidyl-tyrosine phosphorylation	2/96	82/16374	0.0835782	0.16937	0.115932	CD44/LRP4	2
GO:0002320	lymphoid progenitor cell differentiation	1/96	15/16374	0.0844598	0.16937	0.115932	BCL2	1
GO:0002467	germinal center formation	1/96	15/16374	0.0844598	0.16937	0.115932	BCL6	1
GO:0006895	Golgi to endosome transport	1/96	15/16374	0.0844598	0.16937	0.115932	EPS15	1
GO:0010955	negative regulation of protein processing	1/96	15/16374	0.0844598	0.16937	0.115932	MDM2	1
GO:0022602	ovulation cycle process	1/96	15/16374	0.0844598	0.16937	0.115932	BMPR1B	1
GO:0034440	lipid oxidation	1/96	15/16374	0.0844598	0.16937	0.115932	PDK4	1
GO:0042119	neutrophil activation	1/96	15/16374	0.0844598	0.16937	0.115932	PREX1	1
GO:0043254	regulation of protein-containing complex assembly	1/96	15/16374	0.0844598	0.16937	0.115932	GFAP	1
GO:0045104	intermediate filament cytoskeleton organization	1/96	15/16374	0.0844598	0.16937	0.115932	DST	1
GO:0046328	regulation of JNK cascade	1/96	15/16374	0.0844598	0.16937	0.115932	PHLPP1	1
GO:0048268	clathrin coat assembly	1/96	15/16374	0.0844598	0.16937	0.115932	EPS15	1
GO:0050773	regulation of dendrite development	1/96	15/16374	0.0844598	0.16937	0.115932	PREX1	1
GO:0060134	prepulse inhibition	1/96	15/16374	0.0844598	0.16937	0.115932	GRID2	1
GO:0060314	regulation of ryanodine-sensitive calcium-release channel activity	1/96	15/16374	0.0844598	0.16937	0.115932	CAMK2D	1
GO:0060795	cell fate commitment involved in formation of primary germ layer	1/96	15/16374	0.0844598	0.16937	0.115932	SOX2	1
GO:0090051	negative regulation of cell migration involved in sprouting angiogenesis	1/96	15/16374	0.0844598	0.16937	0.115932	STARD13	1
GO:0097107	postsynaptic density assembly	1/96	15/16374	0.0844598	0.16937	0.115932	GRID2	1
GO:1902230	negative regulation of intrinsic apoptotic signaling pathway in response to DNA damage	1/96	15/16374	0.0844598	0.16937	0.115932	CLU	1
GO:2000060	positive regulation of ubiquitin-dependent protein catabolic process	1/96	15/16374	0.0844598	0.16937	0.115932	CLU	1
GO:2000737	negative regulation of stem cell differentiation	1/96	15/16374	0.0844598	0.16937	0.115932	YAP1	1
GO:0016485	protein processing	2/96	83/16374	0.0853259	0.170425	0.116654	MDM2/LDLRAD3	2
GO:0042472	inner ear morphogenesis	2/96	83/16374	0.0853259	0.170425	0.116654	LRIG1/FGFR2	2
GO:0071773	cellular response to BMP stimulus	2/96	83/16374	0.0853259	0.170425	0.116654	BMPR1B/LRP4	2
GO:0031532	actin cytoskeleton reorganization	2/96	84/16374	0.0870847	0.172772	0.118261	GSN/MICALL2	2
GO:0198738	cell-cell signaling by wnt	3/96	179/16374	0.0880657	0.172772	0.118261	FERMT2/DAAM2/LRP4	3
GO:0060348	bone development	2/96	85/16374	0.0888545	0.172772	0.118261	SH3PXD2B/FGFR2	2
GO:0071774	response to fibroblast growth factor	2/96	85/16374	0.0888545	0.172772	0.118261	TNC/FGFR2	2
GO:0050808	synapse organization	3/96	180/16374	0.0891947	0.172772	0.118261	PTN/GRID2/LRP4	3
GO:0006636	unsaturated fatty acid biosynthetic process	1/96	16/16374	0.0898325	0.172772	0.118261	SCD5	1
GO:0008045	motor neuron axon guidance	1/96	16/16374	0.0898325	0.172772	0.118261	ALCAM	1
GO:0010644	cell communication by electrical coupling	1/96	16/16374	0.0898325	0.172772	0.118261	CAMK2D	1
GO:0010934	macrophage cytokine production	1/96	16/16374	0.0898325	0.172772	0.118261	GPRC5B	1
GO:0015813	L-glutamate transmembrane transport	1/96	16/16374	0.0898325	0.172772	0.118261	SLC1A3	1
GO:0022038	corpus callosum development	1/96	16/16374	0.0898325	0.172772	0.118261	LPAR1	1
GO:0030042	actin filament depolymerization	1/96	16/16374	0.0898325	0.172772	0.118261	PLEKHH2	1
GO:0030214	hyaluronan catabolic process	1/96	16/16374	0.0898325	0.172772	0.118261	CD44	1
GO:0034116	positive regulation of heterotypic cell-cell adhesion	1/96	16/16374	0.0898325	0.172772	0.118261	CD44	1
GO:0035025	positive regulation of Rho protein signal transduction	1/96	16/16374	0.0898325	0.172772	0.118261	LPAR1	1
GO:0035988	chondrocyte proliferation	1/96	16/16374	0.0898325	0.172772	0.118261	BMPR1B	1
GO:0042176	regulation of protein catabolic process	1/96	16/16374	0.0898325	0.172772	0.118261	MDM2	1
GO:0043122	regulation of I-kappaB kinase/NF-kappaB signaling	1/96	16/16374	0.0898325	0.172772	0.118261	SQSTM1	1
GO:0043691	reverse cholesterol transport	1/96	16/16374	0.0898325	0.172772	0.118261	CLU	1
GO:0044849	estrous cycle	1/96	16/16374	0.0898325	0.172772	0.118261	PTN	1
GO:0051131	chaperone-mediated protein complex assembly	1/96	16/16374	0.0898325	0.172772	0.118261	CLU	1
GO:0051482	positive regulation of cytosolic calcium ion concentration involved in phospholipase C-activating G protein-coupled signaling pathway	1/96	16/16374	0.0898325	0.172772	0.118261	LPAR1	1
GO:0061377	mammary gland lobule development	1/96	16/16374	0.0898325	0.172772	0.118261	ERBB4	1
GO:0070841	inclusion body assembly	1/96	16/16374	0.0898325	0.172772	0.118261	CLU	1
GO:0086065	cell communication involved in cardiac conduction	1/96	16/16374	0.0898325	0.172772	0.118261	CAMK2D	1
GO:0098698	postsynaptic specialization assembly	1/96	16/16374	0.0898325	0.172772	0.118261	GRID2	1
GO:1900181	negative regulation of protein localization to nucleus	1/96	16/16374	0.0898325	0.172772	0.118261	OTUD7B	1
GO:1901379	regulation of potassium ion transmembrane transport	1/96	16/16374	0.0898325	0.172772	0.118261	DPP10	1
GO:1904754	positive regulation of vascular associated smooth muscle cell migration	1/96	16/16374	0.0898325	0.172772	0.118261	MDM2	1
GO:0003015	heart process	2/96	86/16374	0.090635	0.17365	0.118862	CAMK2D/YAP1	2
GO:0009100	glycoprotein metabolic process	2/96	86/16374	0.090635	0.17365	0.118862	FUT9/BCL2	2
GO:0060041	retina development in camera-type eye	2/96	86/16374	0.090635	0.17365	0.118862	BMPR1B/RORB	2
GO:0030323	respiratory tube development	2/96	87/16374	0.092426	0.176856	0.121056	PTN/FGFR2	2
GO:0045444	fat cell differentiation	3/96	184/16374	0.0937714	0.177816	0.121713	SH3PXD2B/STK3/TCF7L2	3
GO:1903409	reactive oxygen species biosynthetic process	2/96	88/16374	0.0942274	0.177816	0.121713	FOXO3/CLU	2
GO:0001763	morphogenesis of a branching structure	1/96	17/16374	0.0951739	0.177816	0.121713	FGFR2	1
GO:0002026	regulation of the force of heart contraction	1/96	17/16374	0.0951739	0.177816	0.121713	CAMK2D	1
GO:0003158	endothelium development	1/96	17/16374	0.0951739	0.177816	0.121713	PTN	1
GO:0006730	one-carbon metabolic process	1/96	17/16374	0.0951739	0.177816	0.121713	MAT2A	1
GO:0007194	negative regulation of adenylate cyclase activity	1/96	17/16374	0.0951739	0.177816	0.121713	GRM3	1
GO:0008347	glial cell migration	1/96	17/16374	0.0951739	0.177816	0.121713	MATN2	1
GO:0009605	response to external stimulus	1/96	17/16374	0.0951739	0.177816	0.121713	GRID2	1
GO:0009994	oocyte differentiation	1/96	17/16374	0.0951739	0.177816	0.121713	BCL2	1
GO:0010880	regulation of release of sequestered calcium ion into cytosol by sarcoplasmic reticulum	1/96	17/16374	0.0951739	0.177816	0.121713	CAMK2D	1
GO:0043408	regulation of MAPK cascade	1/96	17/16374	0.0951739	0.177816	0.121713	PHLPP1	1
GO:0043523	regulation of neuron apoptotic process	1/96	17/16374	0.0951739	0.177816	0.121713	GRID2	1
GO:0045109	intermediate filament organization	1/96	17/16374	0.0951739	0.177816	0.121713	GFAP	1
GO:0055001	muscle cell development	1/96	17/16374	0.0951739	0.177816	0.121713	MEGF10	1
GO:0060713	labyrinthine layer morphogenesis	1/96	17/16374	0.0951739	0.177816	0.121713	FGFR2	1
GO:0061036	positive regulation of cartilage development	1/96	17/16374	0.0951739	0.177816	0.121713	BMPR1B	1
GO:0090303	positive regulation of wound healing	1/96	17/16374	0.0951739	0.177816	0.121713	KANK1	1
GO:2000010	positive regulation of protein localization to cell surface	1/96	17/16374	0.0951739	0.177816	0.121713	ERBB4	1
GO:0007420	brain development	4/96	295/16374	0.09531	0.177849	0.121736	FOXO3/SOX2/DLC1/FGFR2	4
GO:0018107	peptidyl-threonine phosphorylation	2/96	91/16374	0.099692	0.182083	0.124634	CAMK2D/BCL2	2
GO:0048568	embryonic organ development	2/96	91/16374	0.099692	0.182083	0.124634	STK3/FGFR2	2
GO:0001782	B cell homeostasis	1/96	18/16374	0.100484	0.182083	0.124634	BCL2	1
GO:0001953	negative regulation of cell-matrix adhesion	1/96	18/16374	0.100484	0.182083	0.124634	BCL6	1
GO:0003094	glomerular filtration	1/96	18/16374	0.100484	0.182083	0.124634	MYO1E	1
GO:0003181	atrioventricular valve morphogenesis	1/96	18/16374	0.100484	0.182083	0.124634	MDM2	1
GO:0006925	inflammatory cell apoptotic process	1/96	18/16374	0.100484	0.182083	0.124634	ITPKB	1
GO:0007221	positive regulation of transcription of Notch receptor target	1/96	18/16374	0.100484	0.182083	0.124634	KAT2B	1
GO:0009416	response to light stimulus	1/96	18/16374	0.100484	0.182083	0.124634	SLC1A3	1
GO:0014911	positive regulation of smooth muscle cell migration	1/96	18/16374	0.100484	0.182083	0.124634	BCL2	1
GO:0035272	exocrine system development	1/96	18/16374	0.100484	0.182083	0.124634	FGFR2	1
GO:0048557	embryonic digestive tract morphogenesis	1/96	18/16374	0.100484	0.182083	0.124634	FGFR2	1
GO:0051693	actin filament capping	1/96	18/16374	0.100484	0.182083	0.124634	GSN	1
GO:0051767	nitric-oxide synthase biosynthetic process	1/96	18/16374	0.100484	0.182083	0.124634	NAMPT	1
GO:0051895	negative regulation of focal adhesion assembly	1/96	18/16374	0.100484	0.182083	0.124634	DLC1	1
GO:0060749	mammary gland alveolus development	1/96	18/16374	0.100484	0.182083	0.124634	ERBB4	1
GO:0072574	hepatocyte proliferation	1/96	18/16374	0.100484	0.182083	0.124634	PTN	1
GO:0090201	negative regulation of release of cytochrome c from mitochondria	1/96	18/16374	0.100484	0.182083	0.124634	CLU	1
GO:0097106	postsynaptic density organization	1/96	18/16374	0.100484	0.182083	0.124634	GRID2	1
GO:0097186	amelogenesis	1/96	18/16374	0.100484	0.182083	0.124634	ITGB4	1
GO:0098534	centriole assembly	1/96	18/16374	0.100484	0.182083	0.124634	KAT2B	1
GO:1901214	regulation of neuron death	1/96	18/16374	0.100484	0.182083	0.124634	CLU	1
GO:1903514	release of sequestered calcium ion into cytosol by endoplasmic reticulum	1/96	18/16374	0.100484	0.182083	0.124634	CAMK2D	1
GO:2000114	regulation of establishment of cell polarity	1/96	18/16374	0.100484	0.182083	0.124634	KANK1	1
GO:0045165	cell fate commitment	2/96	92/16374	0.101533	0.18332	0.125481	ERBB4/FGFR2	2
GO:0046546	development of primary male sexual characteristics	2/96	92/16374	0.101533	0.18332	0.125481	CTNNA1/BCL2	2
GO:0071396	cellular response to lipid	2/96	92/16374	0.101533	0.18332	0.125481	CLU/RORB	2
GO:0048534	hematopoietic or lymphoid organ development	2/96	93/16374	0.103384	0.185769	0.127157	PTN/FGFR2	2
GO:0048813	dendrite morphogenesis	2/96	93/16374	0.103384	0.185769	0.127157	PREX2/LRP4	2
GO:0071704	organic substance metabolic process	2/96	93/16374	0.103384	0.185769	0.127157	TXNRD1/PDK4	2
GO:0071805	potassium ion transmembrane transport	2/96	93/16374	0.103384	0.185769	0.127157	DPP10/SLC1A3	2
GO:0001894	tissue homeostasis	2/96	94/16374	0.105244	0.186264	0.127496	PDK4/YAP1	2
GO:0009790	embryo development	2/96	94/16374	0.105244	0.186264	0.127496	ERBB4/FGFR2	2
GO:0033365	protein localization to organelle	2/96	94/16374	0.105244	0.186264	0.127496	PARP9/OTUD7B	2
GO:1905114	cell surface receptor signaling pathway involved in cell-cell signaling	2/96	94/16374	0.105244	0.186264	0.127496	KANK1/FGFR2	2
GO:0001502	cartilage condensation	1/96	19/16374	0.105764	0.186264	0.127496	BMPR1B	1
GO:0001783	B cell apoptotic process	1/96	19/16374	0.105764	0.186264	0.127496	BCL6	1
GO:0003171	atrioventricular valve development	1/96	19/16374	0.105764	0.186264	0.127496	MDM2	1
GO:0022010	central nervous system myelination	1/96	19/16374	0.105764	0.186264	0.127496	CLU	1
GO:0031641	regulation of myelination	1/96	19/16374	0.105764	0.186264	0.127496	PTN	1
GO:0032332	positive regulation of chondrocyte differentiation	1/96	19/16374	0.105764	0.186264	0.127496	BMPR1B	1
GO:0044403	symbiotic process	1/96	19/16374	0.105764	0.186264	0.127496	FN1	1
GO:0046597	negative regulation of viral entry into host cell	1/96	19/16374	0.105764	0.186264	0.127496	GSN	1
GO:0050767	regulation of neurogenesis	1/96	19/16374	0.105764	0.186264	0.127496	YAP1	1
GO:0051641	cellular localization	1/96	19/16374	0.105764	0.186264	0.127496	CAMK2D	1
GO:0060428	lung epithelium development	1/96	19/16374	0.105764	0.186264	0.127496	YAP1	1
GO:2000353	positive regulation of endothelial cell apoptotic process	1/96	19/16374	0.105764	0.186264	0.127496	FOXO3	1
GO:2001243	negative regulation of intrinsic apoptotic signaling pathway	1/96	19/16374	0.105764	0.186264	0.127496	BCL2	1
GO:0001568	blood vessel development	2/96	95/16374	0.107113	0.187978	0.128669	MDM2/TCF7L2	2
GO:0030218	erythrocyte differentiation	2/96	95/16374	0.107113	0.187978	0.128669	FOXO3/BCL6	2
GO:1990778	protein localization to cell periphery	2/96	95/16374	0.107113	0.187978	0.128669	SQSTM1/DPP10	2
GO:0007268	chemical synaptic transmission	4/96	309/16374	0.10817	0.189392	0.129637	GLUL/SLC1A3/GRM3/TUBB2B	4
GO:0022008	neurogenesis	4/96	309/16374	0.10817	0.189392	0.129637	YAP1/NAV2/MATN2/TUBB2B	4
GO:0006974	cellular response to DNA damage stimulus	4/96	311/16374	0.110069	0.191692	0.131211	YAP1/CLU/BCL6/BCL2	4
GO:0060541	respiratory system development	2/96	97/16374	0.110877	0.191692	0.131211	PTN/FGFR2	2
GO:0010881	regulation of cardiac muscle contraction by regulation of the release of sequestered calcium ion	1/96	20/16374	0.111013	0.191692	0.131211	CAMK2D	1
GO:0015012	heparan sulfate proteoglycan biosynthetic process	1/96	20/16374	0.111013	0.191692	0.131211	TCF7L2	1
GO:0036120	cellular response to platelet-derived growth factor stimulus	1/96	20/16374	0.111013	0.191692	0.131211	PTN	1
GO:0042462	eye photoreceptor cell development	1/96	20/16374	0.111013	0.191692	0.131211	RORB	1
GO:0044319	wound healing, spreading of cells	1/96	20/16374	0.111013	0.191692	0.131211	CD44	1
GO:0048846	axon extension involved in axon guidance	1/96	20/16374	0.111013	0.191692	0.131211	ALCAM	1
GO:0051493	regulation of cytoskeleton organization	1/96	20/16374	0.111013	0.191692	0.131211	CLIC4	1
GO:0051497	negative regulation of stress fiber assembly	1/96	20/16374	0.111013	0.191692	0.131211	DLC1	1
GO:0051968	positive regulation of synaptic transmission, glutamatergic	1/96	20/16374	0.111013	0.191692	0.131211	GLUL	1
GO:0060445	branching involved in salivary gland morphogenesis	1/96	20/16374	0.111013	0.191692	0.131211	FGFR2	1
GO:0006996	organelle organization	4/96	315/16374	0.113911	0.196471	0.134482	SQSTM1/ZNF462/SOX2/CLIC4	4
GO:0046777	protein autophosphorylation	3/96	201/16374	0.114259	0.196844	0.134738	CAMK2D/ERBB4/FGFR2	3
GO:0048562	embryonic organ morphogenesis	2/96	99/16374	0.114677	0.197339	0.135076	YAP1/FGFR2	2
GO:0051403	stress-activated MAPK cascade	3/96	202/16374	0.115514	0.1982	0.135666	PHLPP1/STK3/SASH1	3
GO:0002063	chondrocyte development	1/96	21/16374	0.116231	0.1982	0.135666	BMPR1B	1
GO:0003283	atrial septum development	1/96	21/16374	0.116231	0.1982	0.135666	MDM2	1
GO:0021516	dorsal spinal cord development	1/96	21/16374	0.116231	0.1982	0.135666	DAAM2	1
GO:0042759	long-chain fatty acid biosynthetic process	1/96	21/16374	0.116231	0.1982	0.135666	QKI	1
GO:0048260	positive regulation of receptor-mediated endocytosis	1/96	21/16374	0.116231	0.1982	0.135666	CLU	1
GO:0050771	negative regulation of axonogenesis	1/96	21/16374	0.116231	0.1982	0.135666	LRP4	1
GO:0071887	leukocyte apoptotic process	1/96	21/16374	0.116231	0.1982	0.135666	ITPKB	1
GO:0006959	humoral immune response	2/96	100/16374	0.116589	0.198584	0.135929	CLU/BCL2	2
GO:0030900	forebrain development	2/96	101/16374	0.11851	0.200945	0.137545	SOX2/DLC1	2
GO:0034599	cellular response to oxidative stress	2/96	101/16374	0.11851	0.200945	0.137545	TXNRD1/FOXO3	2
GO:0042593	glucose homeostasis	2/96	101/16374	0.11851	0.200945	0.137545	PDK4/TCF7L2	2
GO:1990138	neuron projection extension	2/96	101/16374	0.11851	0.200945	0.137545	FN1/ALCAM	2
GO:0031214	biomineral tissue development	2/96	102/16374	0.120438	0.202008	0.138272	BMPR1B/PTN	2
GO:0001754	eye photoreceptor cell differentiation	1/96	22/16374	0.12142	0.202008	0.138272	RORB	1
GO:0007215	glutamate receptor signaling pathway	1/96	22/16374	0.12142	0.202008	0.138272	GRID2	1
GO:0008589	regulation of smoothened signaling pathway	1/96	22/16374	0.12142	0.202008	0.138272	FGFR2	1
GO:0009314	response to radiation	1/96	22/16374	0.12142	0.202008	0.138272	BCL2	1
GO:0010613	positive regulation of cardiac muscle hypertrophy	1/96	22/16374	0.12142	0.202008	0.138272	CAMK2D	1
GO:0010975	regulation of neuron projection development	1/96	22/16374	0.12142	0.202008	0.138272	GRID2	1
GO:0030318	melanocyte differentiation	1/96	22/16374	0.12142	0.202008	0.138272	BCL2	1
GO:0048714	positive regulation of oligodendrocyte differentiation	1/96	22/16374	0.12142	0.202008	0.138272	PTN	1
GO:0050805	negative regulation of synaptic transmission	1/96	22/16374	0.12142	0.202008	0.138272	GRID2	1
GO:0060401	cytosolic calcium ion transport	1/96	22/16374	0.12142	0.202008	0.138272	BCL2	1
GO:0060999	positive regulation of dendritic spine development	1/96	22/16374	0.12142	0.202008	0.138272	LPAR1	1
GO:0061077	chaperone-mediated protein folding	1/96	22/16374	0.12142	0.202008	0.138272	CLU	1
GO:0061912	selective autophagy	1/96	22/16374	0.12142	0.202008	0.138272	SQSTM1	1
GO:0097120	receptor localization to synapse	1/96	22/16374	0.12142	0.202008	0.138272	GPC6	1
GO:1900273	positive regulation of long-term synaptic potentiation	1/96	22/16374	0.12142	0.202008	0.138272	SQSTM1	1
GO:1904738	vascular associated smooth muscle cell migration	1/96	22/16374	0.12142	0.202008	0.138272	MDM2	1
GO:0006511	ubiquitin-dependent protein catabolic process	4/96	325/16374	0.123775	0.205699	0.140799	SQSTM1/MDM2/CLU/FBXL7	4
GO:0071407	cellular response to organic cyclic compound	2/96	104/16374	0.124318	0.206374	0.141261	CLU/RORB	2
GO:0044344	cellular response to fibroblast growth factor stimulus	2/96	105/16374	0.12627	0.207604	0.142103	CD44/FGFR2	2
GO:0048511	rhythmic process	2/96	105/16374	0.12627	0.207604	0.142103	KAT2B/RORB	2
GO:0000726	non-recombinational repair	1/96	23/16374	0.126578	0.207604	0.142103	PARP9	1
GO:0021772	olfactory bulb development	1/96	23/16374	0.126578	0.207604	0.142103	ERBB4	1
GO:0048747	muscle fiber development	1/96	23/16374	0.126578	0.207604	0.142103	BCL2	1
GO:0048871	multicellular organismal homeostasis	1/96	23/16374	0.126578	0.207604	0.142103	YAP1	1
GO:0051882	mitochondrial depolarization	1/96	23/16374	0.126578	0.207604	0.142103	BCL2	1
GO:0061138	morphogenesis of a branching epithelium	1/96	23/16374	0.126578	0.207604	0.142103	FGFR2	1
GO:0071157	negative regulation of cell cycle arrest	1/96	23/16374	0.126578	0.207604	0.142103	MDM2	1
GO:0086064	cell communication by electrical coupling involved in cardiac conduction	1/96	23/16374	0.126578	0.207604	0.142103	CAMK2D	1
GO:2000378	negative regulation of reactive oxygen species metabolic process	1/96	23/16374	0.126578	0.207604	0.142103	BCL2	1
GO:0009888	tissue development	3/96	211/16374	0.127038	0.208132	0.142465	CD44/CNN3/FGFR2	3
GO:0018212	peptidyl-tyrosine modification	2/96	106/16374	0.128229	0.209614	0.143479	CD44/LRP4	2
GO:0034329	cell junction assembly	2/96	106/16374	0.128229	0.209614	0.143479	FERMT2/GRID2	2
GO:0018105	peptidyl-serine phosphorylation	3/96	213/16374	0.129654	0.209614	0.143479	CAMK2D/CD44/BCL2	3
GO:0001837	epithelial to mesenchymal transition	2/96	107/16374	0.130195	0.209614	0.143479	PHLDB1/FGFR2	2
GO:0098916	anterograde trans-synaptic signaling	2/96	107/16374	0.130195	0.209614	0.143479	SLC1A3/TUBB2B	2
GO:0051402	neuron apoptotic process	3/96	214/16374	0.130969	0.209614	0.143479	FOXO3/BCL2/GRID2	3
GO:0001556	oocyte maturation	1/96	24/16374	0.131706	0.209614	0.143479	FOXO3	1
GO:0001885	endothelial cell development	1/96	24/16374	0.131706	0.209614	0.143479	CLIC4	1
GO:0002053	positive regulation of mesenchymal cell proliferation	1/96	24/16374	0.131706	0.209614	0.143479	FGFR2	1
GO:0003203	endocardial cushion morphogenesis	1/96	24/16374	0.131706	0.209614	0.143479	MDM2	1
GO:0007435	salivary gland morphogenesis	1/96	24/16374	0.131706	0.209614	0.143479	FGFR2	1
GO:0008652	cellular amino acid biosynthetic process	1/96	24/16374	0.131706	0.209614	0.143479	GLUL	1
GO:0010608	posttranscriptional regulation of gene expression	1/96	24/16374	0.131706	0.209614	0.143479	PARP9	1
GO:0014808	release of sequestered calcium ion into cytosol by sarcoplasmic reticulum	1/96	24/16374	0.131706	0.209614	0.143479	CAMK2D	1
GO:0018345	protein palmitoylation	1/96	24/16374	0.131706	0.209614	0.143479	GLUL	1
GO:0032958	inositol phosphate biosynthetic process	1/96	24/16374	0.131706	0.209614	0.143479	ITPKB	1
GO:0035050	embryonic heart tube development	1/96	24/16374	0.131706	0.209614	0.143479	YAP1	1
GO:0035235	ionotropic glutamate receptor signaling pathway	1/96	24/16374	0.131706	0.209614	0.143479	GRID2	1
GO:0038084	vascular endothelial growth factor signaling pathway	1/96	24/16374	0.131706	0.209614	0.143479	SEMA6A	1
GO:0042445	hormone metabolic process	1/96	24/16374	0.131706	0.209614	0.143479	TCF7L2	1
GO:0042551	neuron maturation	1/96	24/16374	0.131706	0.209614	0.143479	BCL2	1
GO:0046697	decidualization	1/96	24/16374	0.131706	0.209614	0.143479	PTN	1
GO:0060828	regulation of canonical Wnt signaling pathway	1/96	24/16374	0.131706	0.209614	0.143479	DAAM2	1
GO:0070296	sarcoplasmic reticulum calcium ion transport	1/96	24/16374	0.131706	0.209614	0.143479	CAMK2D	1
GO:0071398	cellular response to fatty acid	1/96	24/16374	0.131706	0.209614	0.143479	PDK4	1
GO:0072006	nephron development	1/96	24/16374	0.131706	0.209614	0.143479	BCL2	1
GO:0097242	amyloid-beta clearance	1/96	24/16374	0.131706	0.209614	0.143479	CLU	1
GO:0045137	development of primary sexual characteristics	2/96	108/16374	0.132168	0.209905	0.143678	CTNNA1/BCL2	2
GO:0072001	renal system development	2/96	108/16374	0.132168	0.209905	0.143678	ITGB4/LRP4	2
GO:0051259	protein complex oligomerization	2/96	109/16374	0.134148	0.212825	0.145677	CAMK2D/CLU	2
GO:0030163	protein catabolic process	3/96	217/16374	0.134943	0.213862	0.146386	MDM2/CLU/GFAP	3
GO:0001941	postsynaptic membrane organization	1/96	25/16374	0.136804	0.214326	0.146704	LRP4	1
GO:0009954	proximal/distal pattern formation	1/96	25/16374	0.136804	0.214326	0.146704	LRP4	1
GO:0010906	regulation of glucose metabolic process	1/96	25/16374	0.136804	0.214326	0.146704	PDK4	1
GO:0016331	morphogenesis of embryonic epithelium	1/96	25/16374	0.136804	0.214326	0.146704	FGFR2	1
GO:0035307	positive regulation of protein dephosphorylation	1/96	25/16374	0.136804	0.214326	0.146704	DLC1	1
GO:0051149	positive regulation of muscle cell differentiation	1/96	25/16374	0.136804	0.214326	0.146704	CTNNA1	1
GO:0055010	ventricular cardiac muscle tissue morphogenesis	1/96	25/16374	0.136804	0.214326	0.146704	FGFR2	1
GO:0055117	regulation of cardiac muscle contraction	1/96	25/16374	0.136804	0.214326	0.146704	CAMK2D	1
GO:0060384	innervation	1/96	25/16374	0.136804	0.214326	0.146704	LRIG1	1
GO:1900182	positive regulation of protein localization to nucleus	1/96	25/16374	0.136804	0.214326	0.146704	PARP9	1
GO:1900740	positive regulation of protein insertion into mitochondrial membrane involved in apoptotic signaling pathway	1/96	25/16374	0.136804	0.214326	0.146704	BCL2	1
GO:0000209	protein polyubiquitination	3/96	219/16374	0.137616	0.215374	0.147421	SASH1/FBXL7/BCL2	3
GO:0018209	peptidyl-serine modification	2/96	111/16374	0.138128	0.215727	0.147663	CD44/BCL2	2
GO:0042113	B cell activation	2/96	111/16374	0.138128	0.215727	0.147663	BCL6/BCL2	2
GO:0048646	anatomical structure formation involved in morphogenesis	4/96	342/16374	0.141346	0.219749	0.150416	SEMA6A/BCL6/SASH1/PTN	4
GO:0002230	positive regulation of defense response to virus by host	1/96	26/16374	0.141872	0.219749	0.150416	PARP9	1
GO:0018149	peptide cross-linking	1/96	26/16374	0.141872	0.219749	0.150416	FN1	1
GO:0031102	neuron projection regeneration	1/96	26/16374	0.141872	0.219749	0.150416	PTN	1
GO:0042633	hair cycle	1/96	26/16374	0.141872	0.219749	0.150416	LRIG1	1
GO:0046627	negative regulation of insulin receptor signaling pathway	1/96	26/16374	0.141872	0.219749	0.150416	KANK1	1
GO:0051090	regulation of DNA-binding transcription factor activity	1/96	26/16374	0.141872	0.219749	0.150416	SGK3	1
GO:2001234	negative regulation of apoptotic signaling pathway	1/96	26/16374	0.141872	0.219749	0.150416	BCL2	1
GO:0071375	cellular response to peptide hormone stimulus	2/96	114/16374	0.144147	0.223043	0.152671	PDK4/MDM2	2
GO:0022412	cellular process involved in reproduction in multicellular organism	2/96	115/16374	0.146166	0.223865	0.153234	QKI/BCL2	2
GO:0001755	neural crest cell migration	1/96	27/16374	0.146912	0.223865	0.153234	ERBB4	1
GO:0003148	outflow tract septum morphogenesis	1/96	27/16374	0.146912	0.223865	0.153234	FGFR2	1
GO:0003197	endocardial cushion development	1/96	27/16374	0.146912	0.223865	0.153234	MDM2	1
GO:0007099	centriole replication	1/96	27/16374	0.146912	0.223865	0.153234	KAT2B	1
GO:0010332	response to gamma radiation	1/96	27/16374	0.146912	0.223865	0.153234	BCL2	1
GO:0015949	nucleobase-containing small molecule interconversion	1/96	27/16374	0.146912	0.223865	0.153234	TXNRD1	1
GO:0035567	non-canonical Wnt signaling pathway	1/96	27/16374	0.146912	0.223865	0.153234	DAAM2	1
GO:0040014	regulation of multicellular organism growth	1/96	27/16374	0.146912	0.223865	0.153234	FGFR2	1
GO:0043392	negative regulation of DNA binding	1/96	27/16374	0.146912	0.223865	0.153234	ZNF462	1
GO:0046530	photoreceptor cell differentiation	1/96	27/16374	0.146912	0.223865	0.153234	RORB	1
GO:0048741	skeletal muscle fiber development	1/96	27/16374	0.146912	0.223865	0.153234	BCL2	1
GO:0051924	regulation of calcium ion transport	1/96	27/16374	0.146912	0.223865	0.153234	BCL2	1
GO:0070536	protein K63-linked deubiquitination	1/96	27/16374	0.146912	0.223865	0.153234	OTUD7B	1
GO:1900745	positive regulation of p38MAPK cascade	1/96	27/16374	0.146912	0.223865	0.153234	SASH1	1
GO:0010468	regulation of gene expression	2/96	116/16374	0.148191	0.225358	0.154255	SOX2/BCL2	2
GO:0046718	viral entry into host cell	2/96	116/16374	0.148191	0.225358	0.154255	GSN/EPS15	2
GO:0001964	startle response	1/96	28/16374	0.151922	0.228948	0.156713	GRID2	1
GO:0034205	amyloid-beta formation	1/96	28/16374	0.151922	0.228948	0.156713	CLU	1
GO:0045648	positive regulation of erythrocyte differentiation	1/96	28/16374	0.151922	0.228948	0.156713	FOXO3	1
GO:0046631	alpha-beta T cell activation	1/96	28/16374	0.151922	0.228948	0.156713	ITPKB	1
GO:0048854	brain morphogenesis	1/96	28/16374	0.151922	0.228948	0.156713	FOXO3	1
GO:0048864	stem cell development	1/96	28/16374	0.151922	0.228948	0.156713	ERBB4	1
GO:0051204	protein insertion into mitochondrial membrane	1/96	28/16374	0.151922	0.228948	0.156713	BCL2	1
GO:0060292	long-term synaptic depression	1/96	28/16374	0.151922	0.228948	0.156713	GRID2	1
GO:0070507	regulation of microtubule cytoskeleton organization	1/96	28/16374	0.151922	0.228948	0.156713	PHLDB1	1
GO:0048699	generation of neurons	3/96	233/16374	0.156817	0.232953	0.159454	YAP1/MATN2/TUBB2B	3
GO:0001844	protein insertion into mitochondrial membrane involved in apoptotic signaling pathway	1/96	29/16374	0.156902	0.232953	0.159454	BCL2	1
GO:0018205	peptidyl-lysine modification	1/96	29/16374	0.156902	0.232953	0.159454	MDM2	1
GO:0034109	homotypic cell-cell adhesion	1/96	29/16374	0.156902	0.232953	0.159454	MEGF10	1
GO:0043473	pigmentation	1/96	29/16374	0.156902	0.232953	0.159454	BCL2	1
GO:0045066	regulatory T cell differentiation	1/96	29/16374	0.156902	0.232953	0.159454	BCL6	1
GO:0045446	endothelial cell differentiation	1/96	29/16374	0.156902	0.232953	0.159454	PTN	1
GO:0045736	negative regulation of cyclin-dependent protein serine/threonine kinase activity	1/96	29/16374	0.156902	0.232953	0.159454	KAT2B	1
GO:0045880	positive regulation of smoothened signaling pathway	1/96	29/16374	0.156902	0.232953	0.159454	CTNNA1	1
GO:0046427	positive regulation of receptor signaling pathway via JAK-STAT	1/96	29/16374	0.156902	0.232953	0.159454	ERBB4	1
GO:0046579	positive regulation of Ras protein signal transduction	1/96	29/16374	0.156902	0.232953	0.159454	ITPKB	1
GO:0048873	homeostasis of number of cells within a tissue	1/96	29/16374	0.156902	0.232953	0.159454	BCL2	1
GO:0060402	calcium ion transport into cytosol	1/96	29/16374	0.156902	0.232953	0.159454	BCL2	1
GO:0070252	actin-mediated cell contraction	1/96	29/16374	0.156902	0.232953	0.159454	PDE4B	1
GO:2000145	regulation of cell motility	1/96	29/16374	0.156902	0.232953	0.159454	ERBB4	1
GO:0034613	cellular protein localization	3/96	234/16374	0.158219	0.234676	0.160634	CTNNA1/ERBB4/GRID2	3
GO:0007204	positive regulation of cytosolic calcium ion concentration	2/96	121/16374	0.158398	0.23471	0.160657	LPAR1/BCL2	2
GO:0008286	insulin receptor signaling pathway	2/96	122/16374	0.160455	0.237029	0.162244	PDK4/KANK1	2
GO:0030308	negative regulation of cell growth	2/96	122/16374	0.160455	0.237029	0.162244	BCL6/BCL2	2
GO:0003229	ventricular cardiac muscle tissue development	1/96	30/16374	0.161854	0.237029	0.162244	FGFR2	1
GO:0006958	complement activation, classical pathway	1/96	30/16374	0.161854	0.237029	0.162244	CLU	1
GO:0007202	activation of phospholipase C activity	1/96	30/16374	0.161854	0.237029	0.162244	LPAR1	1
GO:0030902	hindbrain development	1/96	30/16374	0.161854	0.237029	0.162244	DLC1	1
GO:0043278	response to morphine	1/96	30/16374	0.161854	0.237029	0.162244	MDM2	1
GO:0045010	actin nucleation	1/96	30/16374	0.161854	0.237029	0.162244	GSN	1
GO:0048483	autonomic nervous system development	1/96	30/16374	0.161854	0.237029	0.162244	FN1	1
GO:0070227	lymphocyte apoptotic process	1/96	30/16374	0.161854	0.237029	0.162244	BCL6	1
GO:0071108	protein K48-linked deubiquitination	1/96	30/16374	0.161854	0.237029	0.162244	OTUD7B	1
GO:1904837	beta-catenin-TCF complex assembly	1/96	30/16374	0.161854	0.237029	0.162244	TCF7L2	1
GO:0022610	biological adhesion	2/96	123/16374	0.162518	0.237538	0.162592	TNC/GSN	2
GO:0044237	cellular metabolic process	2/96	123/16374	0.162518	0.237538	0.162592	PDK4/BCL2	2
GO:0008584	male gonad development	2/96	125/16374	0.166657	0.24165	0.165407	CTNNA1/BCL2	2
GO:0048839	inner ear development	2/96	125/16374	0.166657	0.24165	0.165407	SOX2/FGFR2	2
GO:0001655	urogenital system development	1/96	31/16374	0.166777	0.24165	0.165407	ITGB4	1
GO:0002027	regulation of heart rate	1/96	31/16374	0.166777	0.24165	0.165407	MDM2	1
GO:0021675	nerve development	1/96	31/16374	0.166777	0.24165	0.165407	LRIG1	1
GO:0038128	ERBB2 signaling pathway	1/96	31/16374	0.166777	0.24165	0.165407	ERBB4	1
GO:0048729	tissue morphogenesis	1/96	31/16374	0.166777	0.24165	0.165407	TXNRD1	1
GO:0140053	mitochondrial gene expression	1/96	31/16374	0.166777	0.24165	0.165407	FOXO3	1
GO:1903955	positive regulation of protein targeting to mitochondrion	1/96	31/16374	0.166777	0.24165	0.165407	MICALL2	1
GO:0007623	circadian rhythm	2/96	126/16374	0.168734	0.244015	0.167026	NAMPT/RORB	2
GO:0051216	cartilage development	2/96	126/16374	0.168734	0.244015	0.167026	CD44/BMPR1B	2
GO:0030509	BMP signaling pathway	2/96	127/16374	0.170815	0.245899	0.168316	BMPR1B/LRP4	2
GO:0001881	receptor recycling	1/96	32/16374	0.171672	0.245899	0.168316	EPS15	1
GO:0006473	protein acetylation	1/96	32/16374	0.171672	0.245899	0.168316	KAT2B	1
GO:0008631	intrinsic apoptotic signaling pathway in response to oxidative stress	1/96	32/16374	0.171672	0.245899	0.168316	BCL2	1
GO:0010811	positive regulation of cell-substrate adhesion	1/96	32/16374	0.171672	0.245899	0.168316	PTN	1
GO:0045773	positive regulation of axon extension	1/96	32/16374	0.171672	0.245899	0.168316	FN1	1
GO:0048821	erythrocyte development	1/96	32/16374	0.171672	0.245899	0.168316	BCL6	1
GO:0050435	amyloid-beta metabolic process	1/96	32/16374	0.171672	0.245899	0.168316	CLU	1
GO:0061180	mammary gland epithelium development	1/96	32/16374	0.171672	0.245899	0.168316	ERBB4	1
GO:0071276	cellular response to cadmium ion	1/96	32/16374	0.171672	0.245899	0.168316	GSN	1
GO:0016579	protein deubiquitination	3/96	244/16374	0.172456	0.246787	0.168924	MDM2/KAT2B/OTUD7B	3
GO:0002576	platelet degranulation	2/96	128/16374	0.1729	0.246953	0.169037	FN1/CLU	2
GO:0050794	regulation of cellular process	2/96	128/16374	0.1729	0.246953	0.169037	GPC6/GPC5	2
GO:0007224	smoothened signaling pathway	2/96	129/16374	0.17499	0.248607	0.170169	CTNNA1/FGFR2	2
GO:0008544	epidermis development	2/96	129/16374	0.17499	0.248607	0.170169	LRP4/FGFR2	2
GO:0048812	neuron projection morphogenesis	4/96	373/16374	0.175736	0.248607	0.170169	SEMA6A/ALCAM/MATN2/LRP4	4
GO:0016125	sterol metabolic process	1/96	33/16374	0.176538	0.248607	0.170169	CYP27A1	1
GO:0043029	T cell homeostasis	1/96	33/16374	0.176538	0.248607	0.170169	BCL2	1
GO:0045787	positive regulation of cell cycle	1/96	33/16374	0.176538	0.248607	0.170169	FGFR2	1
GO:0045815	positive regulation of gene expression, epigenetic	1/96	33/16374	0.176538	0.248607	0.170169	KAT2B	1
GO:0048009	insulin-like growth factor receptor signaling pathway	1/96	33/16374	0.176538	0.248607	0.170169	CRIM1	1
GO:0048566	embryonic digestive tract development	1/96	33/16374	0.176538	0.248607	0.170169	FGFR2	1
GO:0060350	endochondral bone morphogenesis	1/96	33/16374	0.176538	0.248607	0.170169	BMPR1B	1
GO:0060425	lung morphogenesis	1/96	33/16374	0.176538	0.248607	0.170169	FGFR2	1
GO:0086001	cardiac muscle cell action potential	1/96	33/16374	0.176538	0.248607	0.170169	CAMK2D	1
GO:0097194	execution phase of apoptosis	1/96	33/16374	0.176538	0.248607	0.170169	DLC1	1
GO:0099072	regulation of postsynaptic membrane neurotransmitter receptor levels	1/96	33/16374	0.176538	0.248607	0.170169	GPC6	1
GO:1904707	positive regulation of vascular smooth muscle cell proliferation	1/96	33/16374	0.176538	0.248607	0.170169	MDM2	1
GO:0030324	lung development	2/96	132/16374	0.181284	0.253285	0.173371	PTN/FGFR2	2
GO:0035924	cellular response to vascular endothelial growth factor stimulus	1/96	34/16374	0.181375	0.253285	0.173371	SEMA6A	1
GO:0042059	negative regulation of epidermal growth factor receptor signaling pathway	1/96	34/16374	0.181375	0.253285	0.173371	EPS15	1
GO:0042592	homeostatic process	1/96	34/16374	0.181375	0.253285	0.173371	YAP1	1
GO:0042987	amyloid precursor protein catabolic process	1/96	34/16374	0.181375	0.253285	0.173371	CLU	1
GO:0043507	positive regulation of JUN kinase activity	1/96	34/16374	0.181375	0.253285	0.173371	SASH1	1
GO:0048332	mesoderm morphogenesis	1/96	34/16374	0.181375	0.253285	0.173371	TXNRD1	1
GO:0048536	spleen development	1/96	34/16374	0.181375	0.253285	0.173371	BCL2	1
GO:0060612	adipose tissue development	1/96	34/16374	0.181375	0.253285	0.173371	SH3PXD2B	1
GO:0014065	phosphatidylinositol 3-kinase signaling	2/96	133/16374	0.183389	0.255861	0.175134	PREX2/ERBB4	2
GO:0006325	chromatin organization	2/96	134/16374	0.185499	0.257903	0.176532	ZNF462/SOX2	2
GO:0001893	maternal placenta development	1/96	35/16374	0.186185	0.257903	0.176532	PTN	1
GO:0006699	bile acid biosynthetic process	1/96	35/16374	0.186185	0.257903	0.176532	CYP27A1	1
GO:0018393	internal peptidyl-lysine acetylation	1/96	35/16374	0.186185	0.257903	0.176532	KAT2B	1
GO:0035094	response to nicotine	1/96	35/16374	0.186185	0.257903	0.176532	BCL2	1
GO:0043277	apoptotic cell clearance	1/96	35/16374	0.186185	0.257903	0.176532	MEGF10	1
GO:1990090	cellular response to nerve growth factor stimulus	1/96	35/16374	0.186185	0.257903	0.176532	FOXO3	1
GO:0016310	phosphorylation	4/96	382/16374	0.186225	0.257903	0.176532	SQSTM1/FN1/ERBB4/ITPKB	4
GO:0051258	protein polymerization	2/96	136/16374	0.189728	0.261103	0.178723	KANK1/PREX1	2
GO:0001706	endoderm formation	1/96	36/16374	0.190966	0.261103	0.178723	FN1	1
GO:0006821	chloride transport	1/96	36/16374	0.190966	0.261103	0.178723	CLIC4	1
GO:0010634	positive regulation of epithelial cell migration	1/96	36/16374	0.190966	0.261103	0.178723	DOCK1	1
GO:0014009	glial cell proliferation	1/96	36/16374	0.190966	0.261103	0.178723	PTN	1
GO:0014812	muscle cell migration	1/96	36/16374	0.190966	0.261103	0.178723	BCL2	1
GO:0019318	hexose metabolic process	1/96	36/16374	0.190966	0.261103	0.178723	PDK4	1
GO:0021983	pituitary gland development	1/96	36/16374	0.190966	0.261103	0.178723	SOX2	1
GO:0035987	endodermal cell differentiation	1/96	36/16374	0.190966	0.261103	0.178723	FN1	1
GO:0045746	negative regulation of Notch signaling pathway	1/96	36/16374	0.190966	0.261103	0.178723	BCL6	1
GO:0071479	cellular response to ionizing radiation	1/96	36/16374	0.190966	0.261103	0.178723	NAMPT	1
GO:0086091	regulation of heart rate by cardiac conduction	1/96	36/16374	0.190966	0.261103	0.178723	CAMK2D	1
GO:0099172	presynapse organization	1/96	36/16374	0.190966	0.261103	0.178723	LRP4	1
GO:1901216	positive regulation of neuron death	1/96	36/16374	0.190966	0.261103	0.178723	CLU	1
GO:0030097	hemopoiesis	2/96	137/16374	0.191848	0.261832	0.179221	PTN/FGFR2	2
GO:0048015	phosphatidylinositol-mediated signaling	2/96	137/16374	0.191848	0.261832	0.179221	GSN/ERBB4	2
GO:0071560	cellular response to transforming growth factor beta stimulus	2/96	138/16374	0.19397	0.264489	0.18104	FERMT2/FGFR2	2
GO:0001662	behavioral fear response	1/96	37/16374	0.19572	0.264953	0.181358	BCL2	1
GO:0003014	renal system process	1/96	37/16374	0.19572	0.264953	0.181358	BCL2	1
GO:0007162	negative regulation of cell adhesion	1/96	37/16374	0.19572	0.264953	0.181358	TNC	1
GO:0010658	striated muscle cell apoptotic process	1/96	37/16374	0.19572	0.264953	0.181358	CAMK2D	1
GO:0042063	gliogenesis	1/96	37/16374	0.19572	0.264953	0.181358	MATN2	1
GO:0044409	entry into host	1/96	37/16374	0.19572	0.264953	0.181358	GSN	1
GO:0048477	oogenesis	1/96	37/16374	0.19572	0.264953	0.181358	PTN	1
GO:2001244	positive regulation of intrinsic apoptotic signaling pathway	1/96	37/16374	0.19572	0.264953	0.181358	BCL2	1
GO:0001934	positive regulation of protein phosphorylation	2/96	141/16374	0.200357	0.268213	0.183589	SQSTM1/ERBB4	2
GO:0002460	adaptive immune response based on somatic recombination of immune receptors built from immunoglobulin superfamily domains	1/96	38/16374	0.200446	0.268213	0.183589	BCL6	1
GO:0007032	endosome organization	1/96	38/16374	0.200446	0.268213	0.183589	SQSTM1	1
GO:0007223	Wnt signaling pathway, calcium modulating pathway	1/96	38/16374	0.200446	0.268213	0.183589	TCF7L2	1
GO:0010659	cardiac muscle cell apoptotic process	1/96	38/16374	0.200446	0.268213	0.183589	CAMK2D	1
GO:0014897	striated muscle hypertrophy	1/96	38/16374	0.200446	0.268213	0.183589	CAMK2D	1
GO:0031529	ruffle organization	1/96	38/16374	0.200446	0.268213	0.183589	KANK1	1
GO:0032623	interleukin-2 production	1/96	38/16374	0.200446	0.268213	0.183589	PDE4B	1
GO:0042149	cellular response to glucose starvation	1/96	38/16374	0.200446	0.268213	0.183589	BCL2	1
GO:0043666	regulation of phosphoprotein phosphatase activity	1/96	38/16374	0.200446	0.268213	0.183589	PPP2R2B	1
GO:0045429	positive regulation of nitric oxide biosynthetic process	1/96	38/16374	0.200446	0.268213	0.183589	CLU	1
GO:0097178	ruffle assembly	1/96	38/16374	0.200446	0.268213	0.183589	KANK1	1
GO:0099173	postsynapse organization	1/96	38/16374	0.200446	0.268213	0.183589	LRP4	1
GO:0007416	synapse assembly	2/96	142/16374	0.202492	0.270709	0.185298	ERBB4/GRID2	2
GO:0008152	metabolic process	1/96	39/16374	0.205145	0.272801	0.18673	TCF7L2	1
GO:0048286	lung alveolus development	1/96	39/16374	0.205145	0.272801	0.18673	FGFR2	1
GO:0051261	protein depolymerization	1/96	39/16374	0.205145	0.272801	0.18673	PLEKHH2	1
GO:0061098	positive regulation of protein tyrosine kinase activity	1/96	39/16374	0.205145	0.272801	0.18673	GPRC5B	1
GO:0098773	skin epidermis development	1/96	39/16374	0.205145	0.272801	0.18673	LRP4	1
GO:2000134	negative regulation of G1/S transition of mitotic cell cycle	1/96	39/16374	0.205145	0.272801	0.18673	BCL2	1
GO:0001974	blood vessel remodeling	1/96	40/16374	0.209816	0.27803	0.190309	MDM2	1
GO:0014047	glutamate secretion	1/96	40/16374	0.209816	0.27803	0.190309	SLC1A3	1
GO:0019395	fatty acid oxidation	1/96	40/16374	0.209816	0.27803	0.190309	PDK4	1
GO:0043124	negative regulation of I-kappaB kinase/NF-kappaB signaling	1/96	40/16374	0.209816	0.27803	0.190309	OTUD7B	1
GO:0001892	embryonic placenta development	1/96	41/16374	0.21446	0.282689	0.193498	STK3	1
GO:0014823	response to activity	1/96	41/16374	0.21446	0.282689	0.193498	PTN	1
GO:0016575	histone deacetylation	1/96	41/16374	0.21446	0.282689	0.193498	BCL6	1
GO:0019941	modification-dependent protein catabolic process	1/96	41/16374	0.21446	0.282689	0.193498	CLU	1
GO:0042093	T-helper cell differentiation	1/96	41/16374	0.21446	0.282689	0.193498	BCL6	1
GO:0099054	presynapse assembly	1/96	41/16374	0.21446	0.282689	0.193498	LRP4	1
GO:0030155	regulation of cell adhesion	1/96	42/16374	0.219078	0.286765	0.196288	GSN	1
GO:0032637	interleukin-8 production	1/96	42/16374	0.219078	0.286765	0.196288	OTUD7B	1
GO:0032729	positive regulation of interferon-gamma production	1/96	42/16374	0.219078	0.286765	0.196288	PDE4B	1
GO:0034332	adherens junction organization	1/96	42/16374	0.219078	0.286765	0.196288	CTNNA1	1
GO:0043616	keratinocyte proliferation	1/96	42/16374	0.219078	0.286765	0.196288	YAP1	1
GO:0051028	mRNA transport	1/96	42/16374	0.219078	0.286765	0.196288	QKI	1
GO:0060412	ventricular septum morphogenesis	1/96	42/16374	0.219078	0.286765	0.196288	FGFR2	1
GO:0061061	muscle structure development	1/96	42/16374	0.219078	0.286765	0.196288	QKI	1
GO:0034220	ion transmembrane transport	3/96	277/16374	0.221724	0.289976	0.198486	SGK3/CLIC4/GRID2	3
GO:0000422	autophagy of mitochondrion	1/96	43/16374	0.223668	0.290498	0.198843	SQSTM1	1
GO:0002455	humoral immune response mediated by circulating immunoglobulin	1/96	43/16374	0.223668	0.290498	0.198843	CLU	1
GO:0006953	acute-phase response	1/96	43/16374	0.223668	0.290498	0.198843	FN1	1
GO:0021915	neural tube development	1/96	43/16374	0.223668	0.290498	0.198843	STK3	1
GO:0045668	negative regulation of osteoblast differentiation	1/96	43/16374	0.223668	0.290498	0.198843	RORB	1
GO:0050804	modulation of chemical synaptic transmission	1/96	43/16374	0.223668	0.290498	0.198843	TUBB2B	1
GO:0051145	smooth muscle cell differentiation	1/96	43/16374	0.223668	0.290498	0.198843	FGFR2	1
GO:0071364	cellular response to epidermal growth factor stimulus	1/96	43/16374	0.223668	0.290498	0.198843	ERBB4	1
GO:0032869	cellular response to insulin stimulus	2/96	152/16374	0.22397	0.290639	0.19894	PDK4/KAT2B	2
GO:0002250	adaptive immune response	2/96	153/16374	0.226129	0.293188	0.200684	ALCAM/OTUD7B	2
GO:0006476	protein deacetylation	1/96	44/16374	0.228231	0.29371	0.201042	BCL6	1
GO:0010718	positive regulation of epithelial to mesenchymal transition	1/96	44/16374	0.228231	0.29371	0.201042	TCF7L2	1
GO:0019935	cyclic-nucleotide-mediated signaling	1/96	44/16374	0.228231	0.29371	0.201042	LPAR1	1
GO:0044265	cellular macromolecule catabolic process	1/96	44/16374	0.228231	0.29371	0.201042	MDM2	1
GO:0048701	embryonic cranial skeleton morphogenesis	1/96	44/16374	0.228231	0.29371	0.201042	FGFR2	1
GO:0050905	neuromuscular process	1/96	44/16374	0.228231	0.29371	0.201042	GRID2	1
GO:0070534	protein K63-linked ubiquitination	1/96	44/16374	0.228231	0.29371	0.201042	SASH1	1
GO:0006470	protein dephosphorylation	2/96	154/16374	0.228289	0.29371	0.201042	DLC1/BCL2	2
GO:0007565	female pregnancy	2/96	154/16374	0.228289	0.29371	0.201042	NAMPT/BCL2	2
GO:1901566	organonitrogen compound biosynthetic process	2/96	155/16374	0.230451	0.296238	0.202772	FUT9/BCL2	2
GO:0051301	cell division	4/96	419/16374	0.231309	0.296681	0.203075	PARD3B/FBXL7/PTN/FGFR2	4
GO:0030072	peptide hormone secretion	2/96	156/16374	0.232615	0.296681	0.203075	GLUL/TCF7L2	2
GO:0048863	stem cell differentiation	2/96	156/16374	0.232615	0.296681	0.203075	YAP1/PTN	2
GO:0001657	ureteric bud development	1/96	45/16374	0.232768	0.296681	0.203075	FGFR2	1
GO:0003208	cardiac ventricle morphogenesis	1/96	45/16374	0.232768	0.296681	0.203075	FGFR2	1
GO:0010508	positive regulation of autophagy	1/96	45/16374	0.232768	0.296681	0.203075	FOXO3	1
GO:0014032	neural crest cell development	1/96	45/16374	0.232768	0.296681	0.203075	ERBB4	1
GO:0036473	cell death in response to oxidative stress	1/96	45/16374	0.232768	0.296681	0.203075	BCL2	1
GO:0042220	response to cocaine	1/96	45/16374	0.232768	0.296681	0.203075	MDM2	1
GO:0072330	monocarboxylic acid biosynthetic process	1/96	45/16374	0.232768	0.296681	0.203075	PDK4	1
GO:0046651	lymphocyte proliferation	2/96	157/16374	0.234779	0.298991	0.204656	BCL6/BCL2	2
GO:0042981	regulation of apoptotic process	2/96	158/16374	0.236945	0.300394	0.205617	PHLPP1/BCL6	2
GO:0045747	positive regulation of Notch signaling pathway	1/96	46/16374	0.237279	0.300394	0.205617	KAT2B	1
GO:0046849	bone remodeling	1/96	46/16374	0.237279	0.300394	0.205617	PTN	1
GO:0048538	thymus development	1/96	46/16374	0.237279	0.300394	0.205617	BCL2	1
GO:0051898	negative regulation of protein kinase B signaling	1/96	46/16374	0.237279	0.300394	0.205617	PHLPP1	1
GO:0071902	positive regulation of protein serine/threonine kinase activity	1/96	46/16374	0.237279	0.300394	0.205617	STK3	1
GO:0072171	mesonephric tubule morphogenesis	1/96	46/16374	0.237279	0.300394	0.205617	BCL2	1
GO:0003407	neural retina development	1/96	47/16374	0.241763	0.304278	0.208275	RORB	1
GO:0008344	adult locomotory behavior	1/96	47/16374	0.241763	0.304278	0.208275	PREX2	1
GO:0008542	visual learning	1/96	47/16374	0.241763	0.304278	0.208275	MEIS2	1
GO:0016050	vesicle organization	1/96	47/16374	0.241763	0.304278	0.208275	EPS15	1
GO:0021953	central nervous system neuron differentiation	1/96	47/16374	0.241763	0.304278	0.208275	FGFR2	1
GO:0032515	negative regulation of phosphoprotein phosphatase activity	1/96	47/16374	0.241763	0.304278	0.208275	PTN	1
GO:0048146	positive regulation of fibroblast proliferation	1/96	47/16374	0.241763	0.304278	0.208275	FN1	1
GO:0003231	cardiac ventricle development	1/96	48/16374	0.246222	0.308341	0.211056	MDM2	1
GO:0007595	lactation	1/96	48/16374	0.246222	0.308341	0.211056	ERBB4	1
GO:0030449	regulation of complement activation	1/96	48/16374	0.246222	0.308341	0.211056	CLU	1
GO:0032760	positive regulation of tumor necrosis factor production	1/96	48/16374	0.246222	0.308341	0.211056	CLU	1
GO:0048008	platelet-derived growth factor receptor signaling pathway	1/96	48/16374	0.246222	0.308341	0.211056	MYO1E	1
GO:1901701	cellular response to oxygen-containing compound	1/96	48/16374	0.246222	0.308341	0.211056	CLU	1
GO:0032956	regulation of actin cytoskeleton organization	1/96	49/16374	0.250654	0.31285	0.214143	DLC1	1
GO:0050853	B cell receptor signaling pathway	1/96	49/16374	0.250654	0.31285	0.214143	BCL2	1
GO:0051881	regulation of mitochondrial membrane potential	1/96	49/16374	0.250654	0.31285	0.214143	BCL2	1
GO:0060675	ureteric bud morphogenesis	1/96	49/16374	0.250654	0.31285	0.214143	BCL2	1
GO:0002064	epithelial cell development	1/96	50/16374	0.255061	0.317034	0.217007	CLIC4	1
GO:0003300	cardiac muscle hypertrophy	1/96	50/16374	0.255061	0.317034	0.217007	CAMK2D	1
GO:0043525	positive regulation of neuron apoptotic process	1/96	50/16374	0.255061	0.317034	0.217007	FOXO3	1
GO:0060548	negative regulation of cell death	1/96	50/16374	0.255061	0.317034	0.217007	CLU	1
GO:1990874	vascular smooth muscle cell proliferation	1/96	50/16374	0.255061	0.317034	0.217007	MDM2	1
GO:0006898	receptor-mediated endocytosis	2/96	168/16374	0.258654	0.320625	0.219465	CLU/LDLRAD3	2
GO:0007254	JNK cascade	2/96	168/16374	0.258654	0.320625	0.219465	PHLPP1/STK3	2
GO:0001656	metanephros development	1/96	51/16374	0.259442	0.320625	0.219465	BCL2	1
GO:0010595	positive regulation of endothelial cell migration	1/96	51/16374	0.259442	0.320625	0.219465	SASH1	1
GO:0033077	T cell differentiation in thymus	1/96	51/16374	0.259442	0.320625	0.219465	BCL2	1
GO:0042542	response to hydrogen peroxide	1/96	51/16374	0.259442	0.320625	0.219465	BCL2	1
GO:0050885	neuromuscular process controlling balance	1/96	51/16374	0.259442	0.320625	0.219465	SLC1A3	1
GO:0007219	Notch signaling pathway	2/96	169/16374	0.260828	0.321019	0.219734	KAT2B/BCL6	2
GO:0010498	proteasomal protein catabolic process	2/96	169/16374	0.260828	0.321019	0.219734	MDM2/CLU	2
GO:0043123	positive regulation of I-kappaB kinase/NF-kappaB signaling	2/96	169/16374	0.260828	0.321019	0.219734	GPRC5B/LPAR1	2
GO:0050821	protein stabilization	2/96	169/16374	0.260828	0.321019	0.219734	CLU/STK3	2
GO:0072331	signal transduction by p53 class mediator	2/96	169/16374	0.260828	0.321019	0.219734	MDM2/CD44	2
GO:0002253	activation of immune response	1/96	52/16374	0.263797	0.322824	0.22097	CLU	1
GO:0030838	positive regulation of actin filament polymerization	1/96	52/16374	0.263797	0.322824	0.22097	GSN	1
GO:0034644	cellular response to UV	1/96	52/16374	0.263797	0.322824	0.22097	PTN	1
GO:0042476	odontogenesis	1/96	52/16374	0.263797	0.322824	0.22097	FGFR2	1
GO:0043086	negative regulation of catalytic activity	1/96	52/16374	0.263797	0.322824	0.22097	PARP9	1
GO:0060135	maternal process involved in female pregnancy	1/96	52/16374	0.263797	0.322824	0.22097	PTN	1
GO:0070830	bicellular tight junction assembly	1/96	52/16374	0.263797	0.322824	0.22097	MICALL2	1
GO:0001508	action potential	1/96	53/16374	0.268127	0.326001	0.223145	CAMK2D	1
GO:0003205	cardiac chamber development	1/96	53/16374	0.268127	0.326001	0.223145	MDM2	1
GO:0021537	telencephalon development	1/96	53/16374	0.268127	0.326001	0.223145	LPAR1	1
GO:0031663	lipopolysaccharide-mediated signaling pathway	1/96	53/16374	0.268127	0.326001	0.223145	SASH1	1
GO:0034113	heterotypic cell-cell adhesion	1/96	53/16374	0.268127	0.326001	0.223145	CD44	1
GO:0043966	histone H3 acetylation	1/96	53/16374	0.268127	0.326001	0.223145	KAT2B	1
GO:0051290	protein heterotetramerization	1/96	53/16374	0.268127	0.326001	0.223145	LRP4	1
GO:0097696	receptor signaling pathway via STAT	1/96	53/16374	0.268127	0.326001	0.223145	ERBB4	1
GO:0002042	cell migration involved in sprouting angiogenesis	1/96	54/16374	0.272432	0.329371	0.225451	STARD13	1
GO:0007043	cell-cell junction assembly	1/96	54/16374	0.272432	0.329371	0.225451	MICALL2	1
GO:0008366	axon ensheathment	1/96	54/16374	0.272432	0.329371	0.225451	PTN	1
GO:0016064	immunoglobulin mediated immune response	1/96	54/16374	0.272432	0.329371	0.225451	CLU	1
GO:0043087	regulation of GTPase activity	1/96	54/16374	0.272432	0.329371	0.225451	BCL6	1
GO:0072577	endothelial cell apoptotic process	1/96	54/16374	0.272432	0.329371	0.225451	FOXO3	1
GO:1903507	negative regulation of nucleic acid-templated transcription	1/96	54/16374	0.272432	0.329371	0.225451	YAP1	1
GO:0008637	apoptotic mitochondrial changes	1/96	55/16374	0.276712	0.334008	0.228626	CLU	1
GO:0044271	cellular nitrogen compound biosynthetic process	1/96	55/16374	0.276712	0.334008	0.228626	CLU	1
GO:0043010	camera-type eye development	2/96	178/16374	0.280397	0.336981	0.23066	BMPR1B/RORB	2
GO:0006977	DNA damage response, signal transduction by p53 class mediator resulting in cell cycle arrest	1/96	56/16374	0.280967	0.336981	0.23066	MDM2	1
GO:0007369	gastrulation	1/96	56/16374	0.280967	0.336981	0.23066	PHLDB1	1
GO:0010972	negative regulation of G2/M transition of mitotic cell cycle	1/96	56/16374	0.280967	0.336981	0.23066	FBXL7	1
GO:0030010	establishment of cell polarity	1/96	56/16374	0.280967	0.336981	0.23066	KANK1	1
GO:0032147	activation of protein kinase activity	1/96	56/16374	0.280967	0.336981	0.23066	GPRC5B	1
GO:0035113	embryonic appendage morphogenesis	1/96	56/16374	0.280967	0.336981	0.23066	LRP4	1
GO:0043647	inositol phosphate metabolic process	1/96	56/16374	0.280967	0.336981	0.23066	ITPKB	1
GO:0007049	cell cycle	4/96	458/16374	0.281423	0.337259	0.230851	MDM2/PARD3B/MEIS2/FGFR2	4
GO:0000003	reproduction	1/96	57/16374	0.285197	0.340425	0.233018	CLIC4	1
GO:0007193	adenylate cyclase-inhibiting G protein-coupled receptor signaling pathway	1/96	57/16374	0.285197	0.340425	0.233018	LPAR1	1
GO:0034394	protein localization to cell surface	1/96	57/16374	0.285197	0.340425	0.233018	ERBB4	1
GO:0043401	steroid hormone mediated signaling pathway	1/96	57/16374	0.285197	0.340425	0.233018	RORB	1
GO:0045453	bone resorption	1/96	57/16374	0.285197	0.340425	0.233018	PDK4	1
GO:0007612	learning	1/96	58/16374	0.289402	0.343808	0.235333	PTN	1
GO:0019730	antimicrobial humoral response	1/96	58/16374	0.289402	0.343808	0.235333	CLU	1
GO:0030520	intracellular estrogen receptor signaling pathway	1/96	58/16374	0.289402	0.343808	0.235333	YAP1	1
GO:0048771	tissue remodeling	1/96	58/16374	0.289402	0.343808	0.235333	PTN	1
GO:0070059	intrinsic apoptotic signaling pathway in response to endoplasmic reticulum stress	1/96	58/16374	0.289402	0.343808	0.235333	BCL2	1
GO:0070527	platelet aggregation	1/96	58/16374	0.289402	0.343808	0.235333	CSRP1	1
GO:0001658	branching involved in ureteric bud morphogenesis	1/96	59/16374	0.293583	0.346313	0.237048	BCL2	1
GO:0002262	myeloid cell homeostasis	1/96	59/16374	0.293583	0.346313	0.237048	ITPKB	1
GO:0016266	O-glycan processing	1/96	59/16374	0.293583	0.346313	0.237048	GALNT15	1
GO:0019953	sexual reproduction	1/96	59/16374	0.293583	0.346313	0.237048	CLIC4	1
GO:0046209	nitric oxide metabolic process	1/96	59/16374	0.293583	0.346313	0.237048	CLU	1
GO:0048469	cell maturation	1/96	59/16374	0.293583	0.346313	0.237048	BCL2	1
GO:0051384	response to glucocorticoid	1/96	59/16374	0.293583	0.346313	0.237048	BCL2	1
GO:0060996	dendritic spine development	1/96	59/16374	0.293583	0.346313	0.237048	LPAR1	1
GO:1901224	positive regulation of NIK/NF-kappaB signaling	1/96	59/16374	0.293583	0.346313	0.237048	SASH1	1
GO:0003279	cardiac septum development	1/96	60/16374	0.29774	0.350118	0.239652	MDM2	1
GO:0007200	phospholipase C-activating G protein-coupled receptor signaling pathway	1/96	60/16374	0.29774	0.350118	0.239652	LPAR1	1
GO:0014070	response to organic cyclic compound	1/96	60/16374	0.29774	0.350118	0.239652	NAMPT	1
GO:0044257	cellular protein catabolic process	1/96	60/16374	0.29774	0.350118	0.239652	MDM2	1
GO:0006941	striated muscle contraction	1/96	61/16374	0.301872	0.352771	0.241468	CAMK2D	1
GO:0019933	cAMP-mediated signaling	1/96	61/16374	0.301872	0.352771	0.241468	LPAR1	1
GO:0032922	circadian regulation of gene expression	1/96	61/16374	0.301872	0.352771	0.241468	NAMPT	1
GO:0042733	embryonic digit morphogenesis	1/96	61/16374	0.301872	0.352771	0.241468	LRP4	1
GO:0043627	response to estrogen	1/96	61/16374	0.301872	0.352771	0.241468	CTNNA1	1
GO:0045669	positive regulation of osteoblast differentiation	1/96	61/16374	0.301872	0.352771	0.241468	BMPR1B	1
GO:0051965	positive regulation of synapse assembly	1/96	61/16374	0.301872	0.352771	0.241468	GRID2	1
GO:0060349	bone morphogenesis	1/96	61/16374	0.301872	0.352771	0.241468	FGFR2	1
GO:0006633	fatty acid biosynthetic process	1/96	62/16374	0.305981	0.35674	0.244185	PDK4	1
GO:0006956	complement activation	1/96	62/16374	0.305981	0.35674	0.244185	CLU	1
GO:0099565	chemical synaptic transmission, postsynaptic	1/96	62/16374	0.305981	0.35674	0.244185	GRID2	1
GO:0017038	protein import	1/96	63/16374	0.310065	0.361222	0.247253	CLU	1
GO:0043066	negative regulation of apoptotic process	4/96	481/16374	0.311774	0.362932	0.248423	SQSTM1/CD44/BCL2/FGFR2	4
GO:0032259	methylation	1/96	64/16374	0.314126	0.365105	0.249911	MAT2A	1
GO:0072655	establishment of protein localization to mitochondrion	1/96	64/16374	0.314126	0.365105	0.249911	MICALL2	1
GO:0051607	defense response to virus	2/96	194/16374	0.315074	0.365924	0.250472	PARP9/BCL2	2
GO:0030073	insulin secretion	2/96	195/16374	0.317232	0.367525	0.251567	GLUL/TCF7L2	2
GO:0072659	protein localization to plasma membrane	2/96	195/16374	0.317232	0.367525	0.251567	SQSTM1/DPP10	2
GO:0003281	ventricular septum development	1/96	65/16374	0.318163	0.367525	0.251567	MDM2	1
GO:0042136	neurotransmitter biosynthetic process	1/96	65/16374	0.318163	0.367525	0.251567	CLU	1
GO:0042752	regulation of circadian rhythm	1/96	65/16374	0.318163	0.367525	0.251567	RORB	1
GO:0043933	protein-containing complex subunit organization	1/96	65/16374	0.318163	0.367525	0.251567	GFAP	1
GO:0071383	cellular response to steroid hormone stimulus	1/96	65/16374	0.318163	0.367525	0.251567	RORB	1
GO:0002376	immune system process	2/96	196/16374	0.319389	0.368657	0.252342	SQSTM1/BCL6	2
GO:0007417	central nervous system development	3/96	339/16374	0.319879	0.36894	0.252536	STK3/ERBB4/PTN	3
GO:0045892	negative regulation of transcription, DNA-templated	4/96	488/16374	0.321084	0.369888	0.253185	MDM2/BCL6/TCF7L2/RORB	4
GO:0006809	nitric oxide biosynthetic process	1/96	66/16374	0.322177	0.369888	0.253185	CLU	1
GO:0007423	sensory organ development	1/96	66/16374	0.322177	0.369888	0.253185	SOX2	1
GO:0045184	establishment of protein localization	1/96	66/16374	0.322177	0.369888	0.253185	MDM2	1
GO:0046330	positive regulation of JNK cascade	1/96	66/16374	0.322177	0.369888	0.253185	STK3	1
GO:0070373	negative regulation of ERK1 and ERK2 cascade	1/96	66/16374	0.322177	0.369888	0.253185	SEMA6A	1
GO:0016570	histone modification	1/96	67/16374	0.326167	0.373898	0.25593	BCL6	1
GO:0070301	cellular response to hydrogen peroxide	1/96	67/16374	0.326167	0.373898	0.25593	MDM2	1
GO:0043433	negative regulation of DNA-binding transcription factor activity	1/96	68/16374	0.330134	0.377295	0.258255	TCF7L2	1
GO:0051603	proteolysis involved in cellular protein catabolic process	1/96	68/16374	0.330134	0.377295	0.258255	MDM2	1
GO:0071333	cellular response to glucose stimulus	1/96	68/16374	0.330134	0.377295	0.258255	FOXO3	1
GO:1902036	regulation of hematopoietic stem cell differentiation	1/96	68/16374	0.330134	0.377295	0.258255	YAP1	1
GO:0043687	post-translational protein modification	3/96	346/16374	0.331137	0.378155	0.258844	FN1/TNC/FBXL7	3
GO:0001701	in utero embryonic development	2/96	202/16374	0.332293	0.379187	0.25955	MYO1E/FGFR2	2
GO:0006954	inflammatory response	4/96	497/16374	0.333087	0.379806	0.259973	NEAT1/GPRC5B/BCL6/BMPR1B	4
GO:0002252	immune effector process	1/96	69/16374	0.334077	0.38007	0.260154	CLU	1
GO:0031146	SCF-dependent proteasomal ubiquitin-dependent protein catabolic process	1/96	69/16374	0.334077	0.38007	0.260154	FBXL7	1
GO:0070838	divalent metal ion transport	1/96	69/16374	0.334077	0.38007	0.260154	BCL2	1
GO:0045652	regulation of megakaryocyte differentiation	1/96	70/16374	0.337998	0.38424	0.263008	KAT2B	1
GO:0003151	outflow tract morphogenesis	1/96	71/16374	0.341896	0.387499	0.26524	FGFR2	1
GO:0006919	activation of cysteine-type endopeptidase activity involved in apoptotic process	1/96	71/16374	0.341896	0.387499	0.26524	DLC1	1
GO:0007259	receptor signaling pathway via JAK-STAT	1/96	71/16374	0.341896	0.387499	0.26524	ERBB4	1
GO:0038127	ERBB signaling pathway	1/96	71/16374	0.341896	0.387499	0.26524	EPS15	1
GO:0030518	intracellular steroid hormone receptor signaling pathway	1/96	72/16374	0.345771	0.391596	0.268044	YAP1	1
GO:0051276	chromosome organization	2/96	210/16374	0.349392	0.393589	0.269408	ZNF462/SOX2	2
GO:0001775	cell activation	1/96	73/16374	0.349624	0.393589	0.269408	CSRP1	1
GO:0022900	electron transport chain	1/96	73/16374	0.349624	0.393589	0.269408	TXNRD1	1
GO:0030522	intracellular receptor signaling pathway	1/96	73/16374	0.349624	0.393589	0.269408	RORB	1
GO:0042391	regulation of membrane potential	1/96	73/16374	0.349624	0.393589	0.269408	CAMK2D	1
GO:0045445	myoblast differentiation	1/96	73/16374	0.349624	0.393589	0.269408	TCF7L2	1
GO:0060048	cardiac muscle contraction	1/96	73/16374	0.349624	0.393589	0.269408	CAMK2D	1
GO:0061008	hepaticobiliary system development	1/96	73/16374	0.349624	0.393589	0.269408	PTN	1
GO:0007613	memory	1/96	74/16374	0.353454	0.397009	0.271749	PTN	1
GO:0031647	regulation of protein stability	1/96	74/16374	0.353454	0.397009	0.271749	BCL2	1
GO:0035725	sodium ion transmembrane transport	1/96	74/16374	0.353454	0.397009	0.271749	CAMK2D	1
GO:0043112	receptor metabolic process	1/96	75/16374	0.357262	0.400987	0.274472	EPS15	1
GO:0030879	mammary gland development	1/96	76/16374	0.361048	0.40433	0.27676	ERBB4	1
GO:0042471	ear morphogenesis	1/96	76/16374	0.361048	0.40433	0.27676	FGFR2	1
GO:0048738	cardiac muscle tissue development	1/96	76/16374	0.361048	0.40433	0.27676	FGFR2	1
GO:0019538	protein metabolic process	2/96	216/16374	0.362123	0.405233	0.277378	MDM2/CLU	2
GO:0016925	protein sumoylation	1/96	77/16374	0.364811	0.40703	0.278608	MDM2	1
GO:0030098	lymphocyte differentiation	1/96	77/16374	0.364811	0.40703	0.278608	BCL2	1
GO:0048515	spermatid differentiation	1/96	77/16374	0.364811	0.40703	0.278608	QKI	1
GO:1900034	regulation of cellular response to heat	1/96	77/16374	0.364811	0.40703	0.278608	CAMK2D	1
GO:0006303	double-strand break repair via nonhomologous end joining	1/96	78/16374	0.368553	0.409382	0.280218	PARP9	1
GO:0009058	biosynthetic process	1/96	78/16374	0.368553	0.409382	0.280218	FOXO3	1
GO:0016197	endosomal transport	1/96	78/16374	0.368553	0.409382	0.280218	SQSTM1	1
GO:0038096	Fc-gamma receptor signaling pathway involved in phagocytosis	1/96	78/16374	0.368553	0.409382	0.280218	DOCK1	1
GO:0048144	fibroblast proliferation	1/96	78/16374	0.368553	0.409382	0.280218	FN1	1
GO:0090596	sensory organ morphogenesis	1/96	78/16374	0.368553	0.409382	0.280218	FGFR2	1
GO:0008610	lipid biosynthetic process	1/96	79/16374	0.372273	0.412296	0.282213	PDK4	1
GO:0014020	primary neural tube formation	1/96	79/16374	0.372273	0.412296	0.282213	DLC1	1
GO:0014068	positive regulation of phosphatidylinositol 3-kinase signaling	1/96	79/16374	0.372273	0.412296	0.282213	ERBB4	1
GO:0032609	interferon-gamma production	1/96	79/16374	0.372273	0.412296	0.282213	PDE4B	1
GO:0030307	positive regulation of cell growth	1/96	80/16374	0.375971	0.416086	0.284807	BCL2	1
GO:0022402	cell cycle process	2/96	223/16374	0.376861	0.416764	0.285271	MDM2/KAT2B	2
GO:0009636	response to toxic substance	1/96	81/16374	0.379648	0.418614	0.286538	BCL2	1
GO:0019079	viral genome replication	1/96	81/16374	0.379648	0.418614	0.286538	BCL2	1
GO:0030595	leukocyte chemotaxis	1/96	81/16374	0.379648	0.418614	0.286538	PTN	1
GO:0030901	midbrain development	1/96	81/16374	0.379648	0.418614	0.286538	FGFR2	1
GO:0006811	ion transport	2/96	226/16374	0.383136	0.421717	0.288661	CLIC4/SLC1A3	2
GO:0021761	limbic system development	1/96	82/16374	0.383303	0.421717	0.288661	FGFR2	1
GO:0098869	cellular oxidant detoxification	1/96	82/16374	0.383303	0.421717	0.288661	TXNRD1	1
GO:0006626	protein targeting to mitochondrion	1/96	83/16374	0.386937	0.424783	0.29076	MICALL2	1
GO:0008016	regulation of heart contraction	1/96	83/16374	0.386937	0.424783	0.29076	CAMK2D	1
GO:0060218	hematopoietic stem cell differentiation	1/96	83/16374	0.386937	0.424783	0.29076	YAP1	1
GO:0009566	fertilization	1/96	84/16374	0.390549	0.428436	0.293261	CLIC4	1
GO:0001843	neural tube closure	1/96	85/16374	0.394141	0.431747	0.295526	DLC1	1
GO:0060047	heart contraction	1/96	85/16374	0.394141	0.431747	0.295526	CAMK2D	1
GO:0043161	proteasome-mediated ubiquitin-dependent protein catabolic process	2/96	232/16374	0.395605	0.433035	0.296408	MDM2/CLU	2
GO:0001889	liver development	1/96	86/16374	0.397712	0.434708	0.297554	PTN	1
GO:0019216	regulation of lipid metabolic process	1/96	86/16374	0.397712	0.434708	0.297554	TXNRD1	1
GO:0051260	protein homooligomerization	2/96	235/16374	0.401798	0.438856	0.300393	GLUL/CLU	2
GO:0001667	ameboidal-type cell migration	1/96	88/16374	0.404791	0.441483	0.302191	DOCK1	1
GO:0048010	vascular endothelial growth factor receptor signaling pathway	1/96	88/16374	0.404791	0.441483	0.302191	DOCK1	1
GO:0002062	chondrocyte differentiation	1/96	89/16374	0.408299	0.444343	0.304148	BMPR1B	1
GO:0030326	embryonic limb morphogenesis	1/96	89/16374	0.408299	0.444343	0.304148	LRP4	1
GO:0035270	endocrine system development	1/96	89/16374	0.408299	0.444343	0.304148	SOX2	1
GO:0006629	lipid metabolic process	2/96	239/16374	0.410009	0.445882	0.305202	TXNRD1/CLU	2
GO:0060079	excitatory postsynaptic potential	1/96	91/16374	0.415255	0.45126	0.308883	GRID2	1
GO:0022607	cellular component assembly	2/96	242/16374	0.416133	0.451887	0.309312	GFAP/LRP4	2
GO:0007626	locomotory behavior	1/96	92/16374	0.418702	0.45435	0.310998	NAV2	1
GO:0000226	microtubule cytoskeleton organization	1/96	93/16374	0.42213	0.456197	0.312262	PHLDB1	1
GO:0006486	protein glycosylation	1/96	93/16374	0.42213	0.456197	0.312262	FUT9	1
GO:0006631	fatty acid metabolic process	1/96	93/16374	0.42213	0.456197	0.312262	PDK4	1
GO:0035690	cellular response to drug	1/96	93/16374	0.42213	0.456197	0.312262	PDE4B	1
GO:0045786	negative regulation of cell cycle	1/96	93/16374	0.42213	0.456197	0.312262	MDM2	1
GO:0006886	intracellular protein transport	2/96	245/16374	0.422225	0.456197	0.312262	MDM2/TCF7L2	2
GO:0048675	axon extension	1/96	94/16374	0.425537	0.459116	0.314261	FN1	1
GO:1990830	cellular response to leukemia inhibitory factor	1/96	94/16374	0.425537	0.459116	0.314261	MAT2A	1
GO:0007173	epidermal growth factor receptor signaling pathway	1/96	95/16374	0.428925	0.461777	0.316082	EPS15	1
GO:0032355	response to estradiol	1/96	95/16374	0.428925	0.461777	0.316082	PTN	1
GO:0043534	blood vessel endothelial cell migration	1/96	95/16374	0.428925	0.461777	0.316082	STARD13	1
GO:0030219	megakaryocyte differentiation	1/96	96/16374	0.432292	0.46507	0.318336	KAT2B	1
GO:0071559	response to transforming growth factor beta	1/96	97/16374	0.43564	0.468337	0.320572	FERMT2	1
GO:0008219	cell death	2/96	256/16374	0.444283	0.477286	0.326698	CLU/BCL2	2
GO:0008543	fibroblast growth factor receptor signaling pathway	1/96	100/16374	0.445568	0.477984	0.327176	FGFR2	1
GO:0070498	interleukin-1-mediated signaling pathway	1/96	100/16374	0.445568	0.477984	0.327176	SQSTM1	1
GO:0006090	pyruvate metabolic process	1/96	101/16374	0.448838	0.48115	0.329342	PDK4	1
GO:0010976	positive regulation of neuron projection development	1/96	102/16374	0.45209	0.483945	0.331256	PTN	1
GO:0060071	Wnt signaling pathway, planar cell polarity pathway	1/96	102/16374	0.45209	0.483945	0.331256	GPC6	1
GO:0010951	negative regulation of endopeptidase activity	1/96	103/16374	0.455322	0.487059	0.333387	CRIM1	1
GO:0006952	defense response	2/96	265/16374	0.461986	0.493836	0.338026	NEAT1/GPRC5B	2
GO:0030216	keratinocyte differentiation	2/96	266/16374	0.463933	0.495565	0.33921	YAP1/CLIC4	2
GO:0071706	tumor necrosis factor superfamily cytokine production	1/96	106/16374	0.464907	0.496253	0.33968	CLU	1
GO:0032640	tumor necrosis factor production	1/96	107/16374	0.468065	0.498915	0.341503	CLU	1
GO:0051091	positive regulation of DNA-binding transcription factor activity	1/96	107/16374	0.468065	0.498915	0.341503	STK3	1
GO:0032870	cellular response to hormone stimulus	1/96	109/16374	0.474325	0.50523	0.345825	RORB	1
GO:0007368	determination of left/right symmetry	1/96	110/16374	0.477428	0.507121	0.347119	DAAM2	1
GO:0009057	macromolecule catabolic process	1/96	110/16374	0.477428	0.507121	0.347119	MDM2	1
GO:1901565	organonitrogen compound catabolic process	1/96	110/16374	0.477428	0.507121	0.347119	MDM2	1
GO:0008104	protein localization	2/96	273/16374	0.477449	0.507121	0.347119	SQSTM1/BCL6	2
GO:0007281	germ cell development	1/96	111/16374	0.480512	0.510014	0.3491	FOXO3	1
GO:0034765	regulation of ion transmembrane transport	1/96	112/16374	0.483579	0.512907	0.35108	CLIC4	1
GO:0009306	protein secretion	2/96	277/16374	0.48508	0.514137	0.351922	GLUL/TCF7L2	2
GO:0006006	glucose metabolic process	1/96	113/16374	0.486627	0.515414	0.352796	PDK4	1
GO:0006508	proteolysis	3/96	448/16374	0.490842	0.519512	0.355601	MDM2/LDLRAD3/DPP10	3
GO:0016311	dephosphorylation	1/96	115/16374	0.492671	0.520715	0.356424	DLC1	1
GO:0044843	cell cycle G1/S phase transition	1/96	115/16374	0.492671	0.520715	0.356424	BCL2	1
GO:0007286	spermatid development	1/96	116/16374	0.495667	0.523146	0.358088	QKI	1
GO:0034605	cellular response to heat	1/96	116/16374	0.495667	0.523146	0.358088	CAMK2D	1
GO:0000187	activation of MAPK activity	1/96	117/16374	0.498645	0.524082	0.358729	LPAR1	1
GO:0005975	carbohydrate metabolic process	1/96	117/16374	0.498645	0.524082	0.358729	FUT9	1
GO:0006810	transport	1/96	117/16374	0.498645	0.524082	0.358729	BCL2	1
GO:0006814	sodium ion transport	1/96	117/16374	0.498645	0.524082	0.358729	CAMK2D	1
GO:0034976	response to endoplasmic reticulum stress	1/96	117/16374	0.498645	0.524082	0.358729	CLU	1
GO:0035194	post-transcriptional gene silencing by RNA	1/96	117/16374	0.498645	0.524082	0.358729	NEAT1	1
GO:0006813	potassium ion transport	1/96	118/16374	0.501605	0.526826	0.360607	DPP10	1
GO:0007519	skeletal muscle tissue development	1/96	120/16374	0.507475	0.531505	0.36381	MEGF10	1
GO:0009408	response to heat	1/96	120/16374	0.507475	0.531505	0.36381	CAMK2D	1
GO:0009615	response to virus	1/96	120/16374	0.507475	0.531505	0.36381	CLU	1
GO:0070555	response to interleukin-1	1/96	120/16374	0.507475	0.531505	0.36381	SQSTM1	1
GO:0070588	calcium ion transmembrane transport	1/96	122/16374	0.513276	0.537207	0.367713	CAMK2D	1
GO:0006302	double-strand break repair	1/96	124/16374	0.519009	0.54283	0.371562	PARP9	1
GO:0014706	striated muscle tissue development	1/96	125/16374	0.52185	0.545044	0.373077	MEGF10	1
GO:0050776	regulation of immune response	1/96	125/16374	0.52185	0.545044	0.373077	BCL6	1
GO:0045766	positive regulation of angiogenesis	1/96	127/16374	0.527484	0.550545	0.376843	SASH1	1
GO:0097435	supramolecular fiber organization	1/96	129/16374	0.533051	0.55597	0.380556	CLU	1
GO:0002244	hematopoietic progenitor cell differentiation	1/96	130/16374	0.535811	0.558074	0.381997	YAP1	1
GO:0035195	gene silencing by miRNA	1/96	130/16374	0.535811	0.558074	0.381997	NEAT1	1
GO:1901796	regulation of signal transduction by p53 class mediator	1/96	131/16374	0.538554	0.560544	0.383687	MDM2	1
GO:0001822	kidney development	1/96	132/16374	0.541281	0.562603	0.385097	LRP4	1
GO:0006605	protein targeting	1/96	132/16374	0.541281	0.562603	0.385097	MICALL2	1
GO:0044772	mitotic cell cycle phase transition	2/96	309/16374	0.543607	0.564631	0.386484	FBXL7/BCL2	2
GO:0043524	negative regulation of neuron apoptotic process	1/96	134/16374	0.546688	0.567439	0.388407	BCL2	1
GO:0044703	multi-organism reproductive process	1/96	136/16374	0.552032	0.57259	0.391933	CLIC4	1
GO:0034612	response to tumor necrosis factor	1/96	137/16374	0.55468	0.574941	0.393542	FOXO3	1
GO:0070887	cellular response to chemical stimulus	1/96	140/16374	0.562533	0.582679	0.398838	LPAR1	1
GO:0030168	platelet activation	1/96	143/16374	0.570248	0.589858	0.403752	CSRP1	1
GO:0032868	response to insulin	1/96	143/16374	0.570248	0.589858	0.403752	PDK4	1
GO:0043043	peptide biosynthetic process	2/96	328/16374	0.576145	0.595547	0.407647	FOXO3/QKI	2
GO:0007005	mitochondrion organization	1/96	146/16374	0.577829	0.596879	0.408558	SQSTM1	1
GO:0016192	vesicle-mediated transport	2/96	334/16374	0.586068	0.604973	0.414098	GSN/DOCK1	2
GO:0051092	positive regulation of NF-kappaB transcription factor activity	1/96	150/16374	0.587732	0.605859	0.414705	CLU	1
GO:0071347	cellular response to interleukin-1	1/96	150/16374	0.587732	0.605859	0.414705	SQSTM1	1
GO:0010256	endomembrane system organization	1/96	151/16374	0.590171	0.607541	0.415856	SQSTM1	1
GO:0071222	cellular response to lipopolysaccharide	1/96	151/16374	0.590171	0.607541	0.415856	PDE4B	1
GO:0032496	response to lipopolysaccharide	1/96	154/16374	0.597404	0.614566	0.420665	FGFR2	1
GO:0044238	primary metabolic process	1/96	159/16374	0.609179	0.626251	0.428663	TXNRD1	1
GO:0038061	NIK/NF-kappaB signaling	1/96	160/16374	0.611493	0.628201	0.429997	SASH1	1
GO:0042254	ribosome biogenesis	1/96	161/16374	0.613794	0.630133	0.43132	GLUL	1
GO:0033209	tumor necrosis factor-mediated signaling pathway	1/96	162/16374	0.61608	0.631619	0.432337	FOXO3	1
GO:0050663	cytokine secretion	1/96	162/16374	0.61608	0.631619	0.432337	FN1	1
GO:0006816	calcium ion transport	1/96	163/16374	0.618354	0.633518	0.433637	BCL2	1
GO:0007179	transforming growth factor beta receptor signaling pathway	1/96	166/16374	0.625094	0.639988	0.438065	FERMT2	1
GO:0044839	cell cycle G2/M phase transition	1/96	168/16374	0.629522	0.644083	0.440869	FBXL7	1
GO:0008380	RNA splicing	1/96	171/16374	0.636068	0.650337	0.44515	QKI	1
GO:0050852	T cell receptor signaling pathway	1/96	172/16374	0.638224	0.652098	0.446355	PDE4B	1
GO:0019058	viral life cycle	1/96	173/16374	0.640368	0.653844	0.44755	EPS15	1
GO:0000082	G1/S transition of mitotic cell cycle	1/96	178/16374	0.650898	0.664146	0.454602	BCL2	1
GO:0042110	T cell activation	1/96	187/16374	0.669091	0.682246	0.466991	CD44	1
GO:0007283	spermatogenesis	2/96	392/16374	0.673249	0.686021	0.469575	BCL6/TESK2	2
GO:0055085	transmembrane transport	2/96	396/16374	0.678685	0.691091	0.473045	CLIC4/BCL2	2
GO:0030335	positive regulation of cell migration	1/96	196/16374	0.686344	0.698418	0.47806	PREX1	1
GO:0016043	cellular component organization	1/96	199/16374	0.691895	0.703177	0.481318	SQSTM1	1
GO:0006355	regulation of transcription, DNA-templated	2/96	406/16374	0.691956	0.703177	0.481318	SOX2/RORB	2
GO:0016236	macroautophagy	1/96	202/16374	0.697349	0.708179	0.484742	SQSTM1	1
GO:0000086	G2/M transition of mitotic cell cycle	1/96	208/16374	0.707971	0.718481	0.491793	FBXL7	1
GO:0071356	cellular response to tumor necrosis factor	1/96	209/16374	0.709706	0.719755	0.492666	FOXO3	1
GO:0007601	visual perception	1/96	210/16374	0.71143	0.721018	0.49353	RORB	1
GO:0050896	response to stimulus	1/96	212/16374	0.714847	0.723993	0.495567	BCL6	1
GO:0010629	negative regulation of gene expression	1/96	213/16374	0.716541	0.72522	0.496407	PARP9	1
GO:0001816	cytokine production	2/96	426/16374	0.71716	0.725358	0.496501	PDE4B/OTUD7B	2
GO:0045087	innate immune response	2/96	429/16374	0.720789	0.728539	0.498678	CLU/PARP9	2
GO:0010469	regulation of signaling receptor activity	2/96	434/16374	0.726752	0.734074	0.502466	NAMPT/PTN	2
GO:0042493	response to drug	1/96	225/16374	0.736106	0.743022	0.508592	BCL2	1
GO:0006397	mRNA processing	1/96	230/16374	0.743858	0.750344	0.513603	QKI	1
GO:0051649	establishment of localization in cell	1/96	235/16374	0.751385	0.757428	0.518452	BCL2	1
GO:0006412	translation	2/96	471/16374	0.767642	0.773298	0.529315	FOXO3/QKI	2
GO:0043312	neutrophil degranulation	2/96	484/16374	0.78071	0.785936	0.537966	CD44/GSN	2
GO:0002446	neutrophil mediated immunity	2/96	488/16374	0.784601	0.789325	0.540285	CD44/GSN	2
GO:0055114	oxidation-reduction process	2/96	492/16374	0.788432	0.792649	0.54256	CYP27A1/SCD5	2
GO:0002444	myeloid leukocyte mediated immunity	2/96	494/16374	0.790326	0.794021	0.5435	CD44/GSN	2
GO:0007596	blood coagulation	1/96	280/16374	0.809992	0.812694	0.556281	DOCK1	1
GO:0120031	plasma membrane bounded cell projection assembly	1/96	280/16374	0.809992	0.812694	0.556281	KANK1	1
GO:0009653	anatomical structure morphogenesis	1/96	282/16374	0.812252	0.814418	0.557461	FGFR2	1
GO:0060271	cilium assembly	1/96	292/16374	0.82316	0.824805	0.564571	GSN	1
GO:0070925	organelle assembly	1/96	312/16374	0.843128	0.844251	0.577882	GSN	1
GO:0007608	sensory perception of smell	1/96	409/16374	0.912452	0.913059	0.62498	NAV2	1
GO:0006955	immune response	1/96	478/16374	0.942307	0.942307	0.645	BCL6	1

## Sheet: Fig6F Cluster2 gene &GO terms
Genes and enriched GO terms of Cluster 2 from injury neurogenic lineage trajectory
ID	Description	GeneRatio	BgRatio	pvalue	p.adjust	qvalue	geneID	Count
GO:0007268	chemical synaptic transmission	37/263	309/16374	7.57593e-22	1.36897e-18	1.12523e-18	LRRC4C/IQSEC2/CACNA1A/ADRA1A/KCND2/PRKCE/KCNQ3/SNAP25/SYT1/GRIK4/HOMER1/GRM5/PTPRN2/DLGAP1/DGKB/GRIA1/GRIA2/GRM1/GRM7/GRIN2B/PPFIA2/RIMS2/DGKI/GRIN2A/GABBR2/UNC13A/SYN3/TNR/ASIC2/CACNA1D/STXBP1/PRKAR1B/CACNA1B/UNC13C/PTK2B/RIMS1/SYN2	37
GO:0034220	ion transmembrane transport	26/263	277/16374	4.34158e-13	3.92262e-10	3.2242e-10	UNC79/ATP2B2/SCN8A/CACNA1A/GRIK5/ATP8B1/KCND2/NEDD4L/KCNQ3/KCNQ5/RYR2/CACNA2D3/UNC80/GRIK4/ANO3/SCN2A/GRIA1/GRIA2/SCN3A/HCN1/CACNA1E/ASIC2/KCND3/CACNA1B/KCNJ6/KCNH1	26
GO:0098916	anterograde trans-synaptic signaling	17/263	107/16374	1.19957e-12	7.22542e-10	5.93893e-10	LRRC4C/IQSEC2/CACNA1A/SNAP25/SYT1/PTPRN2/DGKB/PPFIA2/DGKI/UNC13A/TNR/CACNA1D/STXBP1/PRKAR1B/CACNA1B/RIMS1/SYN2	17
GO:0051649	establishment of localization in cell	23/263	235/16374	4.36556e-12	1.97214e-09	1.621e-09	TRIM9/SYBU/PCLO/TIAM1/GRIK5/ADRA1A/PRKCE/APBA2/SNAP25/SYT1/FGF14/ERC2/STXBP5L/MCTP1/DGKI/UNC13A/SYN3/STXBP1/PRKAR1B/RAPGEF4/RIMS1/CAMK2A/SYN2	23
GO:0031175	neuron projection development	31/263	456/16374	1.18194e-11	4.27153e-09	3.51099e-09	CAMK2B/TMEM108/RBFOX2/CNTN1/SIPA1L1/MAP2/TIAM1/CRMP1/KALRN/NCK2/CAMK1D/RAP1GAP2/LAMB1/TENM3/EPHA4/ZNF804A/SEMA5A/DSCAM/SNAP25/CNTNAP2/CSMD3/ANK3/KIRREL3/PTPRO/ATP8A2/SH3GL2/RTN4RL1/PAK3/BDNF/PTK2B/CAMK2A	31
GO:0007269	neurotransmitter secretion	14/263	79/16374	2.64157e-11	6.74945e-09	5.54771e-09	TRIM9/PCLO/SNAP25/SYT1/PTPRN2/PPFIA2/MCTP1/DGKI/UNC13A/STXBP1/CACNA1B/RIMS1/CAMK2A/SYN2	14
GO:0060078	regulation of postsynaptic membrane potential	13/263	65/16374	2.75059e-11	6.74945e-09	5.54771e-09	TMEM108/NLGN4X/SLC8A1/KCND2/GRIK4/GRM5/FGF14/GRIA1/GRM1/RIMS2/CELF4/PTK2B/RIMS1	13
GO:0034765	regulation of ion transmembrane transport	16/263	112/16374	2.98813e-11	6.74945e-09	5.54771e-09	SCN8A/CACNA1A/KCND2/NEDD4L/KCNQ3/KCNQ5/CACNA2D3/SCN2A/SCN3A/HCN1/CACNA1E/ASIC2/KCND3/CACNA1B/KCNJ6/KCNH1	16
GO:0099003	vesicle-mediated transport in synapse	15/263	113/16374	3.64455e-10	7.31744e-08	6.01457e-08	TRIM9/PCLO/ADRA1A/APBA2/SNAP25/SYT1/ERC2/STXBP5L/DGKI/SYN3/STXBP1/PRKAR1B/RAPGEF4/RIMS1/SYN2	15
GO:0007399	nervous system development	29/263	488/16374	1.34155e-09	2.42417e-07	1.99255e-07	ARNT2/SCN8A/SYBU/PCLO/ALDH1A2/INHBA/JARID2/FGF13/CRMP1/KALRN/APBA2/SEMA5A/DSCAM/KIRREL3/SDK1/ENC1/SCN2A/FGF14/MYT1L/ADAM22/SEZ6L/SH3GL2/GRIN2A/CNTN3/SHANK2/ASIC2/RPS6KA6/BDNF/GABRA4	29
GO:0099643	signal release from synapse	14/263	106/16374	1.52571e-09	2.50632e-07	2.06007e-07	TRIM9/PCLO/ADRA1A/APBA2/SNAP25/SYT1/ERC2/STXBP5L/MCTP1/DGKI/UNC13A/STXBP1/RIMS1/CAMK2A	14
GO:0097484	dendrite extension	9/263	33/16374	1.70927e-09	2.57388e-07	2.1156e-07	TMEM108/AUTS2/CYFIP2/NEDD4L/SYT1/RIMS2/SH3GL2/UNC13A/RIMS1	9
GO:0071805	potassium ion transmembrane transport	13/263	93/16374	2.91566e-09	4.05277e-07	3.33117e-07	KCND2/NEDD4L/KCNQ3/KCNQ5/KCNIP4/SNAP25/DPP6/KCNK1/HCN1/CACNA1D/KCNC2/KCNAB2/KCNH1	13
GO:0050808	synapse organization	17/263	180/16374	5.11975e-09	6.60813e-07	5.43155e-07	LRRC4C/CAMK2B/NLGN4X/ADGRB3/NLGN4Y/LRFN5/EPHA4/GRM5/CDH8/CNKSR2/CBLN2/PTPRO/LINGO2/TNR/ASIC2/PAK3/BDNF	17
GO:0006811	ion transport	18/263	226/16374	2.64739e-08	3.18922e-06	2.62138e-06	SCN8A/CACNA1A/SLC25A18/SLC8A1/KCND2/NEDD4L/KCNQ3/KCNQ5/CACNA2D3/SCN2A/SCN3A/HCN1/CACNA1E/ASIC2/KCND3/CACNA1B/KCNJ6/KCNH1	18
GO:0048812	neuron projection morphogenesis	23/263	373/16374	3.81376e-08	4.30717e-06	3.54028e-06	LRRC4C/NIN/CAMK2B/AUTS2/ADGRB3/SIPA1L1/PPP3CA/TIAM1/CRMP1/KALRN/EPHA4/DSCAM/CNTNAP2/KIRREL3/NRXN3/UNC5D/PTPRO/TNR/DAB1/STXBP1/PAK3/SLIT3/BDNF	23
GO:0007409	axonogenesis	20/263	288/16374	4.40743e-08	4.68484e-06	3.8507e-06	LRRC4C/NIN/AUTS2/SIPA1L1/MAP2/TIAM1/CRMP1/EPHA4/DSCAM/ANK3/NRXN3/UNC5D/PTPRO/ATP8A2/TNR/DAB1/STXBP1/PAK3/SLIT3/BDNF	20
GO:0035235	ionotropic glutamate receptor signaling pathway	7/263	24/16374	6.97911e-08	7.00625e-06	5.75878e-06	GRIK5/GRIK4/GRIA1/GRIA2/GRIN2B/GRIN2A/PTK2B	7
GO:0016079	synaptic vesicle exocytosis	11/263	89/16374	1.79902e-07	1.71096e-05	1.40633e-05	TRIM9/PCLO/ADRA1A/APBA2/SNAP25/SYT1/ERC2/STXBP5L/DGKI/STXBP1/RIMS1	11
GO:0099504	synaptic vesicle cycle	8/263	40/16374	1.96325e-07	1.7738e-05	1.45798e-05	TRIM9/PCLO/SNAP25/SYN3/PRKAR1B/RAPGEF4/RIMS1/SYN2	8
GO:0099566	regulation of postsynaptic cytosolic calcium ion concentration	5/263	10/16374	2.42869e-07	2.08983e-05	1.71773e-05	ATP2B2/SLC8A1/GRM5/GRIA1/GRM1	5
GO:0097061	dendritic spine organization	9/263	57/16374	2.84796e-07	2.30855e-05	1.89751e-05	CAMK2B/SIPA1L1/TIAM1/KALRN/EPHA4/ZNF804A/HOMER1/GRIN2B/PAK3	9
GO:2000310	regulation of NMDA receptor activity	7/263	29/16374	2.93839e-07	2.30855e-05	1.89751e-05	LRRC7/DLG2/GRIA1/GRIA2/GRIN2B/GRIN2A/PTK2B	7
GO:0006813	potassium ion transport	12/263	118/16374	4.32986e-07	3.26002e-05	2.67957e-05	NEDD4L/KCNIP4/ANK3/DPP6/NSF/KCNK1/CACNA1D/KCND3/KCNJ6/PTK2B/KCNAB2/KCNH1	12
GO:0061337	cardiac conduction	11/263	98/16374	4.85928e-07	3.51229e-05	2.88692e-05	ATP2B2/SLC8A1/KCND2/RYR2/KCNIP4/CACNA2D3/KCNK1/CACNA1D/CACNA1C/KCND3/CACNG8	11
GO:0120036	plasma membrane bounded cell projection organization	16/263	231/16374	1.05566e-06	7.33684e-05	6.03051e-05	CAMK2B/CNTN1/CRMP1/CAMK1D/RAP1GAP2/TENM3/EPHA4/ZNF804A/SNAP25/CNTNAP2/KIRREL3/PTPRO/ATP8A2/RTN4RL1/BDNF/PTK2B	16
GO:0071625	vocalization behavior	5/263	14/16374	1.83027e-06	0.000122493	0.000100683	NLGN4X/NLGN4Y/CNTNAP2/NRXN3/SHANK2	5
GO:0017156	calcium-ion regulated exocytosis	7/263	38/16374	2.09999e-06	0.000135524	0.000111394	TRIM9/SYT1/RIMS2/STXBP1/RAPGEF4/RIMS1/SYN2	7
GO:0007416	synapse assembly	12/263	142/16374	3.14104e-06	0.00019572	0.000160872	NLGN4X/ADGRB3/PCLO/NLGN4Y/DSCAM/KIRREL3/SDK1/CBLN2/LINGO2/SHANK2/ASIC2/BDNF	12
GO:0030073	insulin secretion	14/263	195/16374	3.31231e-06	0.000199512	0.000163989	SYBU/PPP3CA/CACNA1A/PCLO/TIAM1/PRKCE/SNAP25/STXBP5L/RIMS2/CACNA1E/CACNA1D/CACNA1C/RAPGEF4/KCNC2	14
GO:0007612	learning	8/263	58/16374	3.81199e-06	0.000222202	0.000182639	NLGN4X/NLGN4Y/FGF13/CNTNAP2/NRXN3/GRM5/SORCS3/SHANK2	8
GO:0060292	long-term synaptic depression	6/263	28/16374	4.54113e-06	0.000256432	0.000210774	SORCS3/GRIA1/DGKI/SHANK2/STXBP1/PTK2B	6
GO:0017157	regulation of exocytosis	5/263	17/16374	5.43793e-06	0.000297768	0.00024475	PCLO/SYT1/NSF/RIMS2/RAPGEF4	5
GO:0001505	regulation of neurotransmitter levels	7/263	44/16374	5.87333e-06	0.00031215	0.000256572	TRIM9/PCLO/SNAP25/MCTP1/UNC13A/RIMS1/CAMK2A	7
GO:0048167	regulation of synaptic plasticity	9/263	85/16374	8.81168e-06	0.000454935	0.000373933	HRH1/SIPA1L1/EPHA4/SORCS3/FGF14/GRIN2B/DGKI/GRIN2A/PTK2B	9
GO:0086001	cardiac muscle cell action potential	6/263	33/16374	1.24808e-05	0.000626465	0.000514922	SLC8A1/RYR2/DMD/CACNA1D/CACNA1C/KCND3	6
GO:0048846	axon extension involved in axon guidance	5/263	20/16374	1.30971e-05	0.000639636	0.000525749	BMPR2/SEMA5A/DSCAM/PLXNA4/SLIT3	5
GO:0060079	excitatory postsynaptic potential	9/263	91/16374	1.54266e-05	0.000733576	0.000602962	TMEM108/NLGN4X/PPP3CA/GRIK5/RIMS2/DGKI/CELF4/PTK2B/RIMS1	9
GO:1903861	positive regulation of dendrite extension	5/263	22/16374	2.16684e-05	0.00100397	0.00082521	NEDD4L/SYT1/RIMS2/UNC13A/RIMS1	5
GO:0045055	regulated exocytosis	10/263	120/16374	2.37243e-05	0.00107175	0.000880921	TRIM9/ADRA1A/APBA2/SNAP25/SYT1/ERC2/STXBP5L/DGKI/STXBP1/RIMS1	10
GO:0006836	neurotransmitter transport	7/263	56/16374	3.01659e-05	0.00132951	0.00109279	TRIM9/PCLO/SNAP25/MCTP1/UNC13A/RIMS1/CAMK2A	7
GO:0014047	glutamate secretion	6/263	40/16374	3.93666e-05	0.0016937	0.00139214	SNAP25/SYT1/GRM7/PPFIA2/STXBP1/RIMS1	6
GO:0030072	peptide hormone secretion	11/263	156/16374	4.44615e-05	0.0018528	0.00152291	PPP3CA/CACNA1A/KALRN/PRKCE/SNAP25/STXBP5L/CACNA1E/CACNA1D/CACNA1C/RAPGEF4/KCNC2	11
GO:0016358	dendrite development	9/263	104/16374	4.51152e-05	0.0018528	0.00152291	RBFOX2/MAP2/NCK2/CAMK1D/DSCAM/CSMD3/DAB1/PAK3/CAMK2A	9
GO:1902284	neuron projection extension involved in neuron projection guidance	4/263	14/16374	5.73649e-05	0.00230352	0.00189338	BMPR2/SEMA5A/DSCAM/PLXNA4	4
GO:0050804	modulation of chemical synaptic transmission	6/263	43/16374	6.0056e-05	0.00235916	0.00193911	LRRC4C/IQSEC2/CACNA1A/DGKB/PRKAR1B/CACNA1B	6
GO:0048013	ephrin receptor signaling pathway	8/263	86/16374	7.16506e-05	0.00272725	0.00224166	EPHA6/SIPA1L1/TIAM1/KALRN/NCK2/EPHA4/GRIN2B/PAK3	8
GO:0050796	regulation of insulin secretion	7/263	64/16374	7.24449e-05	0.00272725	0.00224166	CACNA1A/SNAP25/CACNA1E/CACNA1D/CACNA1C/RAPGEF4/KCNC2	7
GO:0055085	transmembrane transport	18/263	396/16374	7.61348e-05	0.00279144	0.00229442	SCN8A/CACNA1A/TUSC3/ABCA13/KCND2/NEDD4L/KCNQ3/KCNQ5/CACNA2D3/SCN2A/SCN3A/HCN1/CACNA1E/ASIC2/KCND3/CACNA1B/KCNJ6/KCNH1	18
GO:0007158	neuron cell-cell adhesion	4/263	15/16374	7.72396e-05	0.00279144	0.00229442	NLGN4X/NLGN4Y/NRXN3/TNR	4
GO:1901379	regulation of potassium ion transmembrane transport	4/263	16/16374	0.00010169	0.00360301	0.00296149	KCNIP4/DPP6/CACNA1D/KCNAB2	4
GO:0048813	dendrite morphogenesis	8/263	93/16374	0.00012487	0.00433923	0.00356663	RBFOX2/ADGRB3/PPP3CA/MAP2/EPHA4/DSCAM/PAK3/CAMK2A	8
GO:0086012	membrane depolarization during cardiac muscle cell action potential	4/263	17/16374	0.000131306	0.00447678	0.00367969	SLC8A1/ANK3/CACNA1D/CACNA1C	4
GO:0048842	positive regulation of axon extension involved in axon guidance	3/263	7/16374	0.000136706	0.00449142	0.00369172	BMPR2/SEMA5A/DSCAM	3
GO:1903997	positive regulation of non-membrane spanning protein tyrosine kinase activity	3/263	7/16374	0.000136706	0.00449142	0.00369172	ADRA1A/DOCK3/BDNF	3
GO:0003300	cardiac muscle hypertrophy	6/263	50/16374	0.000142508	0.00451776	0.00371337	PPP3CA/LMCD1/TIAM1/JARID2/ADRA1A/RYR2	6
GO:0035176	social behavior	6/263	50/16374	0.000142508	0.00451776	0.00371337	NLGN4X/NLGN4Y/KALRN/CNTNAP2/NRXN3/SHANK2	6
GO:0070588	calcium ion transmembrane transport	9/263	122/16374	0.000155913	0.00485751	0.00399263	ATP2B2/CACNA1A/SLC8A1/CACNA2D3/CACNA1E/CACNA1D/CACNA1C/CACNA1B/CACNG8	9
GO:0007613	memory	7/263	74/16374	0.000183135	0.0056089	0.00461024	HRH1/FGF13/KALRN/SORCS3/SCN2A/GRIN2A/FAM19A2	7
GO:0001508	action potential	6/263	53/16374	0.000197773	0.00595625	0.00489574	ADRA1A/SLC8A1/KCND2/CACNA1D/CACNA1C/KCND3	6
GO:0098976	excitatory chemical synaptic transmission	3/263	8/16374	0.000216133	0.00640248	0.00526252	GRIN2B/GRIN2A/SHISA6	3
GO:0010976	positive regulation of neuron projection development	8/263	102/16374	0.000237543	0.00692321	0.00569053	CAMK2B/CNTN1/CAMK1D/TENM3/ZNF804A/ATP8A2/BDNF/PTK2B	8
GO:0060997	dendritic spine morphogenesis	6/263	55/16374	0.00024314	0.00697388	0.00573218	CAMK2B/SIPA1L1/TIAM1/KALRN/EPHA4/PAK3	6
GO:0010881	regulation of cardiac muscle contraction by regulation of the release of sequestered calcium ion	4/263	20/16374	0.000257347	0.00715425	0.00588043	SLC8A1/RYR2/DMD/CACNA1C	4
GO:0061003	positive regulation of dendritic spine morphogenesis	4/263	20/16374	0.000257347	0.00715425	0.00588043	CAMK2B/TIAM1/KALRN/PAK3	4
GO:0007162	negative regulation of cell adhesion	5/263	37/16374	0.000294627	0.00806653	0.00663028	CDH13/SEMA5A/DSCAM/ADAM22/DAB1	5
GO:0035249	synaptic transmission, glutamatergic	6/263	58/16374	0.000326117	0.00879543	0.0072294	SYT1/HOMER1/GRIA2/UNC13A/TNR/PTK2B	6
GO:0007215	glutamate receptor signaling pathway	4/263	22/16374	0.00037885	0.00992147	0.00815495	GRIK4/GRIN2B/GRIN2A/UNC13A	4
GO:0010842	retina layer formation	4/263	22/16374	0.00037885	0.00992147	0.00815495	MEGF11/DSCAM/SDK1/ATP8A2	4
GO:0006887	exocytosis	8/263	112/16374	0.000448901	0.0115881	0.0095248	PCLO/SYT1/NSF/STXBP5L/RIMS2/SYT16/RAPGEF4/ARHGAP44	8
GO:0006814	sodium ion transport	8/263	117/16374	0.000601082	0.015298	0.0125741	SCN8A/CNTN1/FGF13/SLC8A1/NEDD4L/ANK3/SCN2A/SCN3A	8
GO:0010763	positive regulation of fibroblast migration	3/263	11/16374	0.000614434	0.0154206	0.012675	SLC8A1/PRKCE/PAK3	3
GO:0060384	innervation	4/263	25/16374	0.000630819	0.0156149	0.0128347	ADARB1/COL25A1/UNC13A/GABRB3	4
GO:0048675	axon extension	7/263	94/16374	0.000793922	0.019248	0.0158209	AUTS2/MAP2/BMPR2/SEMA5A/DSCAM/PLXNA4/TNR	7
GO:0043954	cellular component maintenance	3/263	12/16374	0.000809547	0.019248	0.0158209	ZNF804A/HOMER1/GRIN2B	3
GO:0098962	regulation of postsynaptic neurotransmitter receptor activity	3/263	12/16374	0.000809547	0.019248	0.0158209	HOMER1/SHISA9/SHISA6	3
GO:2001222	regulation of neuron migration	3/263	13/16374	0.00103996	0.0244053	0.02006	CAMK2B/UNC5D/CAMK2A	3
GO:0060291	long-term synaptic potentiation	6/263	73/16374	0.00112277	0.0257602	0.0211736	EPHA4/SNAP25/GRIN2A/SHANK2/TNR/PTK2B	6
GO:0060402	calcium ion transport into cytosol	4/263	29/16374	0.00112621	0.0257602	0.0211736	ADRA1A/SLC8A1/RYR2/CACNA1C	4
GO:0035725	sodium ion transmembrane transport	6/263	74/16374	0.00120568	0.0267399	0.0219788	SLC8A1/NEDD4L/SCN2A/KCNK1/HCN1/ASIC2	6
GO:0007417	central nervous system development	14/263	339/16374	0.00121031	0.0267399	0.0219788	ARNT2/PPP3CA/JARID2/BMPR2/SYT1/CNTNAP2/ADAM22/GRIN2B/SH3GL2/GRIN2A/ASIC2/RPS6KA6/CA10/GABRA4	14
GO:1990138	neuron projection extension	7/263	101/16374	0.00121343	0.0267399	0.0219788	MAP2/TIAM1/NEDD4L/SYT1/RIMS2/UNC13A/RIMS1	7
GO:0006816	calcium ion transport	9/263	163/16374	0.00129493	0.0281363	0.0231267	CAMK2B/ATP2B2/PPP3CA/RYR2/HOMER1/CACNA1D/CACNA1B/CACNG8/CAMK2A	9
GO:0046928	regulation of neurotransmitter secretion	3/263	14/16374	0.00130794	0.0281363	0.0231267	MCTP1/RIMS1/CAMK2A	3
GO:0097553	calcium ion transmembrane import into cytosol	5/263	52/16374	0.00144458	0.0302192	0.0248386	PRKCE/GRIN2B/GRIN2A/CEMIP/PTK2B	5
GO:0030534	adult behavior	4/263	31/16374	0.00145493	0.0302192	0.0248386	NLGN4X/CNTNAP2/NRXN3/SHANK2	4
GO:0055013	cardiac muscle cell development	4/263	31/16374	0.00145493	0.0302192	0.0248386	ADRA1A/FHOD3/SLC8A1/SORBS2	4
GO:0046959	habituation	2/263	4/16374	0.00150956	0.0305777	0.0251333	KALRN/DGKI	2
GO:0048790	maintenance of presynaptic active zone structure	2/263	4/16374	0.00150956	0.0305777	0.0251333	PCLO/ERC2	2
GO:0022008	neurogenesis	13/263	309/16374	0.00152296	0.0305777	0.0251333	SORL1/FAM19A1/ATP2B2/AUTS2/NLGN4X/ALDH1A2/FGF13/HDAC9/EPHA4/KIRREL3/MYT1L/GRIN2A/PTK2B	13
GO:0034329	cell junction assembly	7/263	106/16374	0.00160693	0.0315653	0.0259451	NLGN4X/ADGRB3/NLGN4Y/CBLN2/LINGO2/ASIC2/BDNF	7
GO:0035994	response to muscle stretch	3/263	15/16374	0.00161562	0.0315653	0.0259451	SLC8A1/RYR2/DMD	3
GO:0050435	amyloid-beta metabolic process	4/263	32/16374	0.00164202	0.0315653	0.0259451	SORL1/SPON1/EPHA4/UNC13A	4
GO:0086005	ventricular cardiac muscle cell action potential	4/263	32/16374	0.00164202	0.0315653	0.0259451	NEDD4L/RYR2/CACNA1C/KCND3	4
GO:0048667	cell morphogenesis involved in neuron differentiation	7/263	108/16374	0.00178957	0.0337868	0.027771	RBFOX2/MAP2/DSCAM/ANK3/ATP8A2/PAK3/CAMK2A	7
GO:0009306	protein secretion	12/263	277/16374	0.00179498	0.0337868	0.027771	PPP3CA/CACNA1A/HDAC9/PRKCE/SNAP25/STXBP5L/CACNA1E/CACNA1D/CACNA1C/RAPGEF4/KCNC2/FRMD4A	12
GO:0050770	regulation of axonogenesis	3/263	16/16374	0.00196499	0.036232	0.0297808	LRRC4C/SIPA1L1/EPHA4	3
GO:0097091	synaptic vesicle clustering	3/263	16/16374	0.00196499	0.036232	0.0297808	PCLO/SYN3/SYN2	3
GO:0061564	axon development	7/263	110/16374	0.00198794	0.036285	0.0298244	MAP2/EPHA4/SEMA5A/ANK3/ATP8A2/RTN4RL1/PAK3	7
GO:0042987	amyloid precursor protein catabolic process	4/263	34/16374	0.00206514	0.037317	0.0306727	SORL1/SPON1/EPHA4/UNC13A	4
GO:0007411	axon guidance	9/263	175/16374	0.00211248	0.0377945	0.0310652	CRMP1/DSCAM/NRXN3/UNC5D/PTPRO/TNR/DAB1/SLIT3/BDNF	9
GO:0015672	monovalent inorganic cation transport	5/263	57/16374	0.00218096	0.0386372	0.0317579	CNTN1/SLC8A1/ANK3/ASIC2/PTK2B	5
GO:0060042	retina morphogenesis in camera-type eye	4/263	35/16374	0.00230254	0.0401958	0.033039	MEGF11/DSCAM/SDK1/ATP8A2	4
GO:0019722	calcium-mediated signaling	6/263	84/16374	0.00231626	0.0401958	0.033039	CDH13/RYR2/GRIN2B/MCTP1/GRIN2A/PTK2B	6
GO:0051966	regulation of synaptic transmission, glutamatergic	3/263	17/16374	0.00235792	0.0401958	0.033039	SYT1/HOMER1/UNC13A	3
GO:0060080	inhibitory postsynaptic potential	3/263	17/16374	0.00235792	0.0401958	0.033039	RIMS2/GABRB3/RIMS1	3
GO:0007216	G protein-coupled glutamate receptor signaling pathway	2/263	5/16374	0.00248927	0.0405234	0.0333082	GRM5/GRM1	2
GO:0008038	neuron recognition	2/263	5/16374	0.00248927	0.0405234	0.0333082	CNTNAP2/OPCML	2
GO:0021942	radial glia guided migration of Purkinje cell	2/263	5/16374	0.00248927	0.0405234	0.0333082	RBFOX2/DAB1	2
GO:0098735	positive regulation of the force of heart contraction	2/263	5/16374	0.00248927	0.0405234	0.0333082	SLC8A1/RYR2	2
GO:1900452	regulation of long-term synaptic depression	2/263	5/16374	0.00248927	0.0405234	0.0333082	SORCS3/DGKI	2
GO:0060996	dendritic spine development	5/263	59/16374	0.00254092	0.0409951	0.0336959	CAMK2B/NCK2/SDK1/PAK3/CAMK2A	5
GO:0010977	negative regulation of neuron projection development	5/263	60/16374	0.00273621	0.0433714	0.0356491	CRMP1/RAP1GAP2/EPHA4/PTPRO/RTN4RL1	5
GO:0034330	cell junction organization	5/263	60/16374	0.00273621	0.0433714	0.0356491	LRRC4C/LRFN5/CDH8/CNKSR2/PTPRO	5
GO:0051932	synaptic transmission, GABAergic	4/263	37/16374	0.00283245	0.0445064	0.036582	ADRA1A/PRKCE/SYN3/STXBP1	4
GO:0051965	positive regulation of synapse assembly	5/263	61/16374	0.00294214	0.0458315	0.0376712	ADGRB3/CBLN2/LINGO2/ASIC2/BDNF	5
GO:0035637	multicellular organismal signaling	6/263	89/16374	0.00309889	0.047455	0.0390056	ATP2B2/SLC8A1/KCND2/RYR2/ANK3/TNR	6
GO:0051146	striated muscle cell differentiation	6/263	89/16374	0.00309889	0.047455	0.0390056	ADGRB3/SLC8A1/HDAC9/ACVR1/BDNF/KCNH1	6
GO:0098662	inorganic cation transmembrane transport	5/263	62/16374	0.00315904	0.0479696	0.0394286	NEDD4L/KCNIP4/DPP6/CACNA1D/KCNAB2	5
GO:0003171	atrioventricular valve development	3/263	19/16374	0.00328135	0.0482065	0.0396233	BMPR2/ACVR1/SLIT3	3
GO:0021756	striatum development	3/263	19/16374	0.00328135	0.0482065	0.0396233	JAKMIP1/INHBA/CNTNAP2	3
GO:0050919	negative chemotaxis	3/263	19/16374	0.00328135	0.0482065	0.0396233	SEMA5A/PLXNA4/SLIT3	3
GO:0097062	dendritic spine maintenance	3/263	19/16374	0.00328135	0.0482065	0.0396233	ZNF804A/HOMER1/GRIN2B	3
GO:0007626	locomotory behavior	6/263	92/16374	0.00365447	0.0513517	0.0422085	APBA2/DSCAM/SNAP25/GRM5/GRM1/CACNA1B	6
GO:0008154	actin polymerization or depolymerization	6/263	92/16374	0.00365447	0.0513517	0.0422085	NCK2/FHOD3/PRKCE/SEMA5A/PAK3/PTK2B	6
GO:0021957	corticospinal tract morphogenesis	2/263	6/16374	0.00369437	0.0513517	0.0422085	NIN/EPHA4	2
GO:0031630	regulation of synaptic vesicle fusion to presynaptic active zone membrane	2/263	6/16374	0.00369437	0.0513517	0.0422085	GRIK5/STXBP1	2
GO:0042428	serotonin metabolic process	2/263	6/16374	0.00369437	0.0513517	0.0422085	BTBD9/GRIN2A	2
GO:1901016	regulation of potassium ion transmembrane transporter activity	2/263	6/16374	0.00369437	0.0513517	0.0422085	NEDD4L/CACNA1D	2
GO:2000651	positive regulation of sodium ion transmembrane transporter activity	2/263	6/16374	0.00369437	0.0513517	0.0422085	DMD/ANK3	2
GO:0022610	biological adhesion	7/263	123/16374	0.00372397	0.0513681	0.042222	PPP3CA/CDH13/SEMA5A/DSCAM/ADAM22/DAB1/PTK2B	7
GO:0045332	phospholipid translocation	3/263	20/16374	0.003815	0.052225	0.0429263	ATP8B1/ATP9A/ATP8A2	3
GO:0048666	neuron development	9/263	193/16374	0.00405932	0.0551518	0.045332	TMEM108/CNTN1/MAP2/LAMB1/CNTNAP2/MYT1L/OPCML/SH3GL2/PTK2B	9
GO:0086002	cardiac muscle cell action potential involved in contraction	4/263	41/16374	0.00413111	0.0552957	0.0454503	RYR2/CACNA1D/CACNA1C/KCND3	4
GO:0099054	presynapse assembly	4/263	41/16374	0.00413111	0.0552957	0.0454503	NLGN4X/NLGN4Y/LRFN5/CBLN2	4
GO:0055006	cardiac cell development	3/263	21/16374	0.00439851	0.058442	0.0480364	ADRA1A/FHOD3/SORBS2	3
GO:0060412	ventricular septum morphogenesis	4/263	42/16374	0.00450927	0.0594763	0.0488865	BMPR2/ZFPM2/ACVR1/SLIT3	4
GO:0070838	divalent metal ion transport	5/263	69/16374	0.00501161	0.061648	0.0506716	CAMK2B/HOMER1/CACNA1D/CACNA1B/CAMK2A	5
GO:0048668	collateral sprouting	3/263	22/16374	0.0050332	0.061648	0.0506716	NIN/FGF13/BDNF	3
GO:0050805	negative regulation of synaptic transmission	3/263	22/16374	0.0050332	0.061648	0.0506716	SORCS3/DGKI/TNR	3
GO:0097120	receptor localization to synapse	3/263	22/16374	0.0050332	0.061648	0.0506716	IQSEC2/CEP112/SNAP25	3
GO:0010882	regulation of cardiac muscle contraction by calcium ion signaling	2/263	7/16374	0.00511743	0.061648	0.0506716	SLC8A1/RYR2	2
GO:0048278	vesicle docking	2/263	7/16374	0.00511743	0.061648	0.0506716	SYT1/STXBP1	2
GO:0051388	positive regulation of neurotrophin TRK receptor signaling pathway	2/263	7/16374	0.00511743	0.061648	0.0506716	TMEM108/CYFIP2	2
GO:0060998	regulation of dendritic spine development	2/263	7/16374	0.00511743	0.061648	0.0506716	CAMK2B/SDK1	2
GO:0097151	positive regulation of inhibitory postsynaptic potential	2/263	7/16374	0.00511743	0.061648	0.0506716	RIMS2/RIMS1	2
GO:0099500	vesicle fusion to plasma membrane	2/263	7/16374	0.00511743	0.061648	0.0506716	GRIK5/STXBP1	2
GO:1990048	anterograde neuronal dense core vesicle transport	2/263	7/16374	0.00511743	0.061648	0.0506716	SYBU/MAP2	2
GO:2000369	regulation of clathrin-dependent endocytosis	2/263	7/16374	0.00511743	0.061648	0.0506716	SH3GL2/SNAP91	2
GO:2000650	negative regulation of sodium ion transmembrane transporter activity	2/263	7/16374	0.00511743	0.061648	0.0506716	NEDD4L/PRKCE	2
GO:0086064	cell communication by electrical coupling involved in cardiac conduction	3/263	23/16374	0.00572025	0.0684536	0.0562654	SLC8A1/RYR2/CACNA1C	3
GO:0042220	response to cocaine	4/263	45/16374	0.0057819	0.0687361	0.0564976	TIAM1/HOMER1/SDK1/PTK2B	4
GO:0032940	secretion by cell	7/263	134/16374	0.0059363	0.0701104	0.0576272	PCLO/SYT1/NSF/GRM7/RIMS2/RAPGEF4/FRMD4A	7
GO:0042391	regulation of membrane potential	5/263	73/16374	0.00636112	0.0721862	0.0593334	ADRA1A/NEDD4L/RIMS2/HCN1/ASIC2	5
GO:0051258	protein polymerization	7/263	136/16374	0.00642595	0.0721862	0.0593334	NIN/MAP2/NCK2/FHOD3/PRKCE/PAK3/PTK2B	7
GO:0003174	mitral valve development	2/263	8/16374	0.0067512	0.0721862	0.0593334	BMPR2/ACVR1	2
GO:0006688	glycosphingolipid biosynthetic process	2/263	8/16374	0.0067512	0.0721862	0.0593334	LARGE1/ST6GALNAC5	2
GO:0007172	signal complex assembly	2/263	8/16374	0.0067512	0.0721862	0.0593334	NCK2/PTK2B	2
GO:0031629	synaptic vesicle fusion to presynaptic active zone membrane	2/263	8/16374	0.0067512	0.0721862	0.0593334	GRIK5/STXBP1	2
GO:0032959	inositol trisphosphate biosynthetic process	2/263	8/16374	0.0067512	0.0721862	0.0593334	HRH1/PTK2B	2
GO:0045762	positive regulation of adenylate cyclase activity	2/263	8/16374	0.0067512	0.0721862	0.0593334	CACNA1D/CACNA1C	2
GO:0048791	calcium ion-regulated exocytosis of neurotransmitter	2/263	8/16374	0.0067512	0.0721862	0.0593334	SYT1/RIMS2	2
GO:0060478	acrosomal vesicle exocytosis	2/263	8/16374	0.0067512	0.0721862	0.0593334	STXBP1/RIMS1	2
GO:0061669	spontaneous neurotransmitter secretion	2/263	8/16374	0.0067512	0.0721862	0.0593334	SYT1/RIMS2	2
GO:0071420	cellular response to histamine	2/263	8/16374	0.0067512	0.0721862	0.0593334	HRH1/GABRB3	2
GO:0098693	regulation of synaptic vesicle cycle	2/263	8/16374	0.0067512	0.0721862	0.0593334	PRKAR1B/RAPGEF4	2
GO:0098969	neurotransmitter receptor transport to postsynaptic membrane	2/263	8/16374	0.0067512	0.0721862	0.0593334	SNAP25/ARHGAP44	2
GO:0003407	neural retina development	4/263	47/16374	0.00675123	0.0721862	0.0593334	MEGF11/DSCAM/SDK1/ATP8A2	4
GO:2000300	regulation of synaptic vesicle exocytosis	4/263	47/16374	0.00675123	0.0721862	0.0593334	ADRA1A/APBA2/STXBP5L/DGKI	4
GO:0007605	sensory perception of sound	7/263	138/16374	0.00694508	0.0738222	0.0606781	ATP2B2/ATP8B1/GRM7/GABRB3/ASIC2/CACNA1D/CEMIP	7
GO:2000463	positive regulation of excitatory postsynaptic potential	3/263	25/16374	0.00725576	0.0766734	0.0630217	RIMS2/PTK2B/RIMS1	3
GO:0055002	striated muscle cell development	3/263	26/16374	0.00810614	0.0841827	0.069194	ADRA1A/FHOD3/SORBS2	3
GO:0060074	synapse maturation	3/263	26/16374	0.00810614	0.0841827	0.069194	CAMK2B/SYBU/SEZ6L	3
GO:0065008	regulation of biological quality	3/263	26/16374	0.00810614	0.0841827	0.069194	SYBU/CDH8/PTPRO	3
GO:0019226	transmission of nerve impulse	4/263	50/16374	0.00839754	0.0843455	0.0693278	KCND2/CNTNAP2/ANK3/TNR	4
GO:0021536	diencephalon development	4/263	50/16374	0.00839754	0.0843455	0.0693278	ALDH1A2/SEMA5A/CNTNAP2/KCNC2	4
GO:0097756	negative regulation of blood vessel diameter	4/263	50/16374	0.00839754	0.0843455	0.0693278	HRH1/BMPR2/ADRA1A/ASIC2	4
GO:0003301	physiological cardiac muscle hypertrophy	2/263	9/16374	0.00858859	0.0843455	0.0693278	ADRA1A/SORBS2	2
GO:0016081	synaptic vesicle docking	2/263	9/16374	0.00858859	0.0843455	0.0693278	SNAP25/CAMK2A	2
GO:0086015	SA node cell action potential	2/263	9/16374	0.00858859	0.0843455	0.0693278	RYR2/CACNA1D	2
GO:0098814	spontaneous synaptic transmission	2/263	9/16374	0.00858859	0.0843455	0.0693278	SYT1/RIMS2	2
GO:0099170	postsynaptic modulation of chemical synaptic transmission	2/263	9/16374	0.00858859	0.0843455	0.0693278	PPP3CA/GRM5	2
GO:1990416	cellular response to brain-derived neurotrophic factor stimulus	2/263	9/16374	0.00858859	0.0843455	0.0693278	TMEM108/SH3GL2	2
GO:2000008	regulation of protein localization to cell surface	2/263	9/16374	0.00858859	0.0843455	0.0693278	BDNF/KCNAB2	2
GO:0048468	cell development	9/263	218/16374	0.00881451	0.0856334	0.0703864	TMEM108/CNTN1/MAP2/LAMB1/CNTNAP2/OPCML/SH3GL2/SIPA1L3/PTK2B	9
GO:0060322	head development	9/263	218/16374	0.00881451	0.0856334	0.0703864	ARNT2/PPP3CA/ALDH1A2/BMPR2/SYT1/CNTNAP2/GRIN2B/GRIN2A/CA10	9
GO:0003073	regulation of systemic arterial blood pressure	3/263	27/16374	0.00901273	0.0857158	0.0704541	BMPR2/ADRA1A/ADAMTS16	3
GO:0048741	skeletal muscle fiber development	3/263	27/16374	0.00901273	0.0857158	0.0704541	PPP3CA/HDAC9/HOMER1	3
GO:0050803	regulation of synapse structure or activity	3/263	27/16374	0.00901273	0.0857158	0.0704541	SYBU/CDH8/PTPRO	3
GO:0051928	positive regulation of calcium ion transport	3/263	27/16374	0.00901273	0.0857158	0.0704541	HOMER1/CACNA1D/CAMK2A	3
GO:0051899	membrane depolarization	4/263	52/16374	0.00962923	0.0910996	0.0748793	CACNA1A/NEDD4L/CACNA1E/CACNA1B	4
GO:0001964	startle response	3/263	28/16374	0.00997628	0.093146	0.0765613	CSMD1/GRIN2A/KCNH1	3
GO:0034205	amyloid-beta formation	3/263	28/16374	0.00997628	0.093146	0.0765613	SORL1/SPON1/EPHA4	3
GO:0007264	small GTPase mediated signal transduction	10/263	262/16374	0.0100002	0.093146	0.0765613	SIPA1L1/TIAM1/KALRN/RAP1GAP2/DOCK3/DGKI/SIPA1L3/DAB1/RAPGEF4/ARHGAP44	10
GO:0007611	learning or memory	4/263	53/16374	0.0102868	0.0943563	0.0775561	GRM5/GRIN2B/GRIN2A/PRKAR1B	4
GO:0021537	telencephalon development	4/263	53/16374	0.0102868	0.0943563	0.0775561	SLC8A1/PLXNA4/TNR/RTN4RL1	4
GO:0030001	metal ion transport	4/263	53/16374	0.0102868	0.0943563	0.0775561	CNTN1/SLC8A1/ANK3/PTK2B	4
GO:0003183	mitral valve morphogenesis	2/263	10/16374	0.0106227	0.0945575	0.0777215	BMPR2/ACVR1	2
GO:0032957	inositol trisphosphate metabolic process	2/263	10/16374	0.0106227	0.0945575	0.0777215	HRH1/PTK2B	2
GO:0051279	regulation of release of sequestered calcium ion into cytosol	2/263	10/16374	0.0106227	0.0945575	0.0777215	PRKCE/PTK2B	2
GO:0071313	cellular response to caffeine	2/263	10/16374	0.0106227	0.0945575	0.0777215	SLC8A1/RYR2	2
GO:0086016	AV node cell action potential	2/263	10/16374	0.0106227	0.0945575	0.0777215	RYR2/CACNA1C	2
GO:0090394	negative regulation of excitatory postsynaptic potential	2/263	10/16374	0.0106227	0.0945575	0.0777215	NLGN4X/CELF4	2
GO:0008016	regulation of heart contraction	5/263	83/16374	0.0108118	0.0957689	0.0787172	ATP2B2/CELF2/SLC8A1/RYR2/CACNA1B	5
GO:0007422	peripheral nervous system development	3/263	29/16374	0.0109974	0.0969385	0.0796785	SCN8A/PLXNA4/ASIC2	3
GO:0060047	heart contraction	5/263	85/16374	0.0119051	0.10443	0.0858358	CELF2/SLC8A1/RYR2/DMD/CACNA1B	5
GO:0010862	positive regulation of pathway-restricted SMAD protein phosphorylation	3/263	30/16374	0.0120768	0.105424	0.0866533	INHBA/BMPR2/ACVR1	3
GO:0003015	heart process	5/263	86/16374	0.0124789	0.108411	0.0891081	CELF2/SLC8A1/RYR2/DMD/CACNA1B	5
GO:0021610	facial nerve morphogenesis	2/263	11/16374	0.0128467	0.1095	0.0900037	ADARB1/PLXNA4	2
GO:0048172	regulation of short-term neuronal synaptic plasticity	2/263	11/16374	0.0128467	0.1095	0.0900037	UNC13A/SHISA9	2
GO:0048681	negative regulation of axon regeneration	2/263	11/16374	0.0128467	0.1095	0.0900037	EPHA4/RTN4RL1	2
GO:0098911	regulation of ventricular cardiac muscle cell action potential	2/263	11/16374	0.0128467	0.1095	0.0900037	RYR2/CACNA1C	2
GO:0048699	generation of neurons	9/263	233/16374	0.0132135	0.110552	0.0908683	FAM19A1/ATP2B2/AUTS2/NLGN4X/ALDH1A2/FGF13/HDAC9/KIRREL3/MYT1L	9
GO:0002027	regulation of heart rate	3/263	31/16374	0.0132149	0.110552	0.0908683	SLC8A1/RYR2/DMD	3
GO:0016601	Rac protein signal transduction	3/263	31/16374	0.0132149	0.110552	0.0908683	AUTS2/CDH13/TIAM1	3
GO:0021675	nerve development	3/263	31/16374	0.0132149	0.110552	0.0908683	ADARB1/UNC13A/GABRB3	3
GO:0034613	cellular protein localization	9/263	234/16374	0.0135558	0.112882	0.0927833	MAP2/NEDD4L/DMD/NSF/RIMS2/AP3B2/BDNF/KCNAB2/RIMS1	9
GO:0030041	actin filament polymerization	5/263	89/16374	0.0143122	0.118634	0.0975108	NCK2/FHOD3/PRKCE/PAK3/PTK2B	5
GO:0001975	response to amphetamine	3/263	32/16374	0.014412	0.118916	0.0977429	PPP3CA/HDAC9/GRIN2A	3
GO:0030032	lamellipodium assembly	4/263	59/16374	0.0148427	0.119845	0.0985063	AUTS2/CDH13/NCK2/PTPRO	4
GO:0034622	cellular protein-containing complex assembly	4/263	59/16374	0.0148427	0.119845	0.0985063	TRIM9/PDE4DIP/DMD/STXBP1	4
GO:0003143	embryonic heart tube morphogenesis	2/263	12/16374	0.0152542	0.119845	0.0985063	RYR2/ACVR1	2
GO:0005513	detection of calcium ion	2/263	12/16374	0.0152542	0.119845	0.0985063	RYR2/SYT1	2
GO:0016082	synaptic vesicle priming	2/263	12/16374	0.0152542	0.119845	0.0985063	ERC2/STXBP1	2
GO:0032230	positive regulation of synaptic transmission, GABAergic	2/263	12/16374	0.0152542	0.119845	0.0985063	ADRA1A/PRKCE	2
GO:0035641	locomotory exploration behavior	2/263	12/16374	0.0152542	0.119845	0.0985063	PRKCE/TNR	2
GO:0046834	lipid phosphorylation	2/263	12/16374	0.0152542	0.119845	0.0985063	DGKB/DGKI	2
GO:0047496	vesicle transport along microtubule	2/263	12/16374	0.0152542	0.119845	0.0985063	DYNC1I1/MAP2	2
GO:0099645	neurotransmitter receptor localization to postsynaptic specialization membrane	2/263	12/16374	0.0152542	0.119845	0.0985063	IQSEC2/DLG2	2
GO:1902430	negative regulation of amyloid-beta formation	2/263	12/16374	0.0152542	0.119845	0.0985063	SORL1/SPON1	2
GO:0031103	axon regeneration	3/263	33/16374	0.0156687	0.121817	0.100127	EPHA4/DHFR/RTN4RL1	3
GO:0048011	neurotrophin TRK receptor signaling pathway	3/263	33/16374	0.0156687	0.121817	0.100127	TMEM108/CYFIP2/BDNF	3
GO:0003279	cardiac septum development	4/263	60/16374	0.0157074	0.121817	0.100127	BMPR2/ZFPM2/ACVR1/SLIT3	4
GO:0035773	insulin secretion involved in cellular response to glucose stimulus	4/263	61/16374	0.0166033	0.127668	0.104937	SYBU/TIAM1/PRKCE/PTPRN2	4
GO:0042310	vasoconstriction	4/263	61/16374	0.0166033	0.127668	0.104937	HRH1/BMPR2/ADRA1A/ASIC2	4
GO:0032924	activin receptor signaling pathway	3/263	34/16374	0.0169852	0.129503	0.106445	INHBA/BMPR2/ACVR1	3
GO:0043507	positive regulation of JUN kinase activity	3/263	34/16374	0.0169852	0.129503	0.106445	TIAM1/EPHA4/PTK2B	3
GO:0099565	chemical synaptic transmission, postsynaptic	4/263	62/16374	0.0175304	0.132651	0.109033	PPP3CA/GRIK5/DGKI/GABRB3	4
GO:0006883	cellular sodium ion homeostasis	2/263	13/16374	0.0178386	0.132651	0.109033	SLC8A1/NEDD4L	2
GO:0007494	midgut development	2/263	13/16374	0.0178386	0.132651	0.109033	ALDH1A2/DAB1	2
GO:0038007	netrin-activated signaling pathway	2/263	13/16374	0.0178386	0.132651	0.109033	DSCAM/UNC5D	2
GO:0038179	neurotrophin signaling pathway	2/263	13/16374	0.0178386	0.132651	0.109033	TMEM108/CYFIP2	2
GO:0042490	mechanoreceptor differentiation	2/263	13/16374	0.0178386	0.132651	0.109033	ATP8B1/GABRB3	2
GO:0007156	homophilic cell adhesion via plasma membrane adhesion molecules	6/263	129/16374	0.0179155	0.132678	0.109054	CDH13/TENM3/DSCAM/KIRREL3/SDK1/CLSTN2	6
GO:0000904	cell morphogenesis involved in differentiation	7/263	167/16374	0.0184169	0.135834	0.111649	RBFOX2/MAP2/DSCAM/ANK3/ATP8A2/PAK3/CAMK2A	7
GO:0016192	vesicle-mediated transport	11/263	334/16374	0.0194897	0.142033	0.116744	PPP3CA/PCLO/CDH13/KALRN/CAMK1D/NEDD4L/SYT1/NSF/MCTP1/RIMS2/RAPGEF4	11
GO:0001706	endoderm formation	3/263	36/16374	0.0197984	0.142033	0.116744	INHBA/COL4A2/LAMB1	3
GO:0035987	endodermal cell differentiation	3/263	36/16374	0.0197984	0.142033	0.116744	INHBA/COL4A2/LAMB1	3
GO:0086091	regulation of heart rate by cardiac conduction	3/263	36/16374	0.0197984	0.142033	0.116744	CACNA1D/CACNA1C/KCND3	3
GO:0099172	presynapse organization	3/263	36/16374	0.0197984	0.142033	0.116744	NLGN4X/LRFN5/CBLN2	3
GO:1904646	cellular response to amyloid-beta	3/263	36/16374	0.0197984	0.142033	0.116744	CACNA1A/EPHA4/GRM5	3
GO:0003281	ventricular septum development	4/263	65/16374	0.0205032	0.142033	0.116744	BMPR2/ZFPM2/ACVR1/SLIT3	4
GO:0007214	gamma-aminobutyric acid signaling pathway	2/263	14/16374	0.0205937	0.142033	0.116744	GABBR2/GABRB3	2
GO:0035493	SNARE complex assembly	2/263	14/16374	0.0205937	0.142033	0.116744	TRIM9/STXBP1	2
GO:0048148	behavioral response to cocaine	2/263	14/16374	0.0205937	0.142033	0.116744	HOMER1/SDK1	2
GO:0048168	regulation of neuronal synaptic plasticity	2/263	14/16374	0.0205937	0.142033	0.116744	MCTP1/CAMK2A	2
GO:0061178	regulation of insulin secretion involved in cellular response to glucose stimulus	2/263	14/16374	0.0205937	0.142033	0.116744	TIAM1/PRKCE	2
GO:0072112	glomerular visceral epithelial cell differentiation	2/263	14/16374	0.0205937	0.142033	0.116744	BASP1/PTPRO	2
GO:0072347	response to anesthetic	2/263	14/16374	0.0205937	0.142033	0.116744	HOMER1/SDK1	2
GO:0097202	activation of cysteine-type endopeptidase activity	2/263	14/16374	0.0205937	0.142033	0.116744	CYFIP2/GRIN2A	2
GO:0097623	potassium ion export across plasma membrane	2/263	14/16374	0.0205937	0.142033	0.116744	KCNT2/KCND3	2
GO:1904645	response to amyloid-beta	2/263	14/16374	0.0205937	0.142033	0.116744	CACNA1A/CACNA1B	2
GO:0010761	fibroblast migration	3/263	37/16374	0.0212954	0.146315	0.120263	SLC8A1/PRKCE/PAK3	3
GO:0014897	striated muscle hypertrophy	3/263	38/16374	0.0228528	0.155068	0.127458	LMCD1/JARID2/ADRA1A	3
GO:0030501	positive regulation of bone mineralization	3/263	38/16374	0.0228528	0.155068	0.127458	BMPR2/SLC8A1/ACVR1	3
GO:0034654	nucleobase-containing compound biosynthetic process	3/263	38/16374	0.0228528	0.155068	0.127458	BMPR2/PAK3/PTK2B	3
GO:0007274	neuromuscular synaptic transmission	2/263	15/16374	0.0235134	0.155068	0.127458	ADARB1/STXBP1	2
GO:0010765	positive regulation of sodium ion transport	2/263	15/16374	0.0235134	0.155068	0.127458	CNTN1/ANK3	2
GO:0022602	ovulation cycle process	2/263	15/16374	0.0235134	0.155068	0.127458	INHBA/SLIT3	2
GO:0050773	regulation of dendrite development	2/263	15/16374	0.0235134	0.155068	0.127458	CAMK1D/CSMD3	2
GO:0050884	neuromuscular process controlling posture	2/263	15/16374	0.0235134	0.155068	0.127458	ADARB1/ATP8A2	2
GO:0061001	regulation of dendritic spine morphogenesis	2/263	15/16374	0.0235134	0.155068	0.127458	SIPA1L1/EPHA4	2
GO:0090162	establishment of epithelial cell polarity	2/263	15/16374	0.0235134	0.155068	0.127458	SIPA1L3/FRMD4A	2
GO:2000573	positive regulation of DNA biosynthetic process	2/263	15/16374	0.0235134	0.155068	0.127458	PAK3/PTK2B	2
GO:0001764	neuron migration	6/263	141/16374	0.0263896	0.172227	0.141562	CAMK2B/AUTS2/FGF13/KIRREL3/UNC5D/CAMK2A	6
GO:0008045	motor neuron axon guidance	2/263	16/16374	0.0265917	0.172227	0.141562	EPHA4/PLXNA4	2
GO:0010644	cell communication by electrical coupling	2/263	16/16374	0.0265917	0.172227	0.141562	SLC8A1/ANK3	2
GO:0022038	corpus callosum development	2/263	16/16374	0.0265917	0.172227	0.141562	NIN/RTN4RL1	2
GO:0030042	actin filament depolymerization	2/263	16/16374	0.0265917	0.172227	0.141562	SEMA5A/MICAL2	2
GO:0000381	regulation of alternative mRNA splicing, via spliceosome	3/263	41/16374	0.0278867	0.179328	0.147399	RBFOX2/CELF4/CELF5	3
GO:0051283	negative regulation of sequestering of calcium ion	3/263	41/16374	0.0278867	0.179328	0.147399	PRKCE/CEMIP/PTK2B	3
GO:0051056	regulation of small GTPase mediated signal transduction	6/263	143/16374	0.0280218	0.179558	0.147588	SIPA1L1/TIAM1/KALRN/RAP1GAP2/SIPA1L3/ARHGAP44	6
GO:0001707	mesoderm formation	3/263	42/16374	0.029685	0.186789	0.153531	INHBA/BMPR2/ACVR1	3
GO:0034199	activation of protein kinase A activity	2/263	17/16374	0.0298229	0.186789	0.153531	PRKAR1B/ADCY9	2
GO:0071397	cellular response to cholesterol	2/263	17/16374	0.0298229	0.186789	0.153531	GRAMD1B/INHBA	2
GO:0086014	atrial cardiac muscle cell action potential	2/263	17/16374	0.0298229	0.186789	0.153531	RYR2/CACNA1C	2
GO:1901700	response to oxygen-containing compound	2/263	17/16374	0.0298229	0.186789	0.153531	HOMER1/SDK1	2
GO:0007015	actin filament organization	4/263	73/16374	0.0298738	0.186789	0.153531	NCK2/FHOD3/DIAPH2/SORBS2	4
GO:0060048	cardiac muscle contraction	4/263	73/16374	0.0298738	0.186789	0.153531	ADRA1A/SLC8A1/RYR2/DMD	4
GO:0098609	cell-cell adhesion	7/263	187/16374	0.0316186	0.197017	0.161938	TENM2/CYFIP2/TMOD3/ANK3/FNDC3A/TNR/DAB1	7
GO:0051209	release of sequestered calcium ion into cytosol	4/263	75/16374	0.0325522	0.202137	0.166146	PRKCE/RYR2/CEMIP/PTK2B	4
GO:0003181	atrioventricular valve morphogenesis	2/263	18/16374	0.0332012	0.204063	0.16773	ACVR1/SLIT3	2
GO:0021544	subpallium development	2/263	18/16374	0.0332012	0.204063	0.16773	JAKMIP1/CNTNAP2	2
GO:0048490	anterograde synaptic vesicle transport	2/263	18/16374	0.0332012	0.204063	0.16773	MAP2/AP3B2	2
GO:0001704	formation of primary germ layer	3/263	45/16374	0.0354379	0.216339	0.177819	INHBA/COL4A2/LAMB1	3
GO:0050890	cognition	3/263	45/16374	0.0354379	0.216339	0.177819	JAKMIP1/TUSC3/GRM5	3
GO:0045471	response to ethanol	5/263	113/16374	0.035655	0.216931	0.178307	UNC79/GRIN2B/GRIN2A/KCNC2/PTK2B	5
GO:0140238	presynaptic endocytosis	2/263	19/16374	0.0367212	0.220274	0.181054	BTBD9/SH3GL2	2
GO:0090630	activation of GTPase activity	3/263	46/16374	0.0374739	0.220274	0.181054	SIPA1L1/TIAM1/PTK2B	3
GO:0021766	hippocampus development	4/263	79/16374	0.0383183	0.220274	0.181054	TMEM108/FGF13/KIRREL3/DAB1	4
GO:0072659	protein localization to plasma membrane	7/263	195/16374	0.0383253	0.220274	0.181054	TTC7B/FGF13/PRKCE/KCNIP4/ANK3/DPP6/STXBP1	7
GO:0030335	positive regulation of cell migration	7/263	196/16374	0.0392243	0.220274	0.181054	PPP3CA/CDH13/TIAM1/LAMB1/ACVR1/CEMIP/PTK2B	7
GO:0008344	adult locomotory behavior	3/263	47/16374	0.0395687	0.220274	0.181054	KALRN/ADAM22/SEZ6L	3
GO:0008542	visual learning	3/263	47/16374	0.0395687	0.220274	0.181054	HRH1/GRIN2A/FAM19A2	3
GO:0060389	pathway-restricted SMAD protein phosphorylation	3/263	47/16374	0.0395687	0.220274	0.181054	INHBA/BMPR2/ACVR1	3
GO:0070509	calcium ion import	3/263	47/16374	0.0395687	0.220274	0.181054	SLC8A1/HOMER1/CACNA1D	3
GO:0043279	response to alkaloid	2/263	20/16374	0.0403775	0.220274	0.181054	HOMER1/SDK1	2
GO:0048169	regulation of long-term neuronal synaptic plasticity	2/263	20/16374	0.0403775	0.220274	0.181054	CAMK2B/GRM5	2
GO:0051968	positive regulation of synaptic transmission, glutamatergic	2/263	20/16374	0.0403775	0.220274	0.181054	TNR/PTK2B	2
GO:0021761	limbic system development	4/263	82/16374	0.0430024	0.220274	0.181054	FGF13/CNTNAP2/KIRREL3/DAB1	4
GO:0002063	chondrocyte development	2/263	21/16374	0.0441647	0.220274	0.181054	BMPR2/CHST11	2
GO:0003283	atrial septum development	2/263	21/16374	0.0441647	0.220274	0.181054	BMPR2/ACVR1	2
GO:0019228	neuronal action potential	2/263	21/16374	0.0441647	0.220274	0.181054	KCND2/ANK3	2
GO:0035418	protein localization to synapse	2/263	21/16374	0.0441647	0.220274	0.181054	PCLO/ASIC2	2
GO:0050772	positive regulation of axonogenesis	2/263	21/16374	0.0441647	0.220274	0.181054	NIN/TIAM1	2
GO:0050807	regulation of synapse organization	2/263	21/16374	0.0441647	0.220274	0.181054	CDH8/PTPRO	2
GO:0051000	positive regulation of nitric-oxide synthase activity	2/263	21/16374	0.0441647	0.220274	0.181054	DHFR/PTK2B	2
GO:0060560	developmental growth involved in morphogenesis	2/263	21/16374	0.0441647	0.220274	0.181054	FGF13/BDNF	2
GO:0086009	membrane repolarization	2/263	21/16374	0.0441647	0.220274	0.181054	NEDD4L/KCND3	2
GO:0019233	sensory perception of pain	4/263	83/16374	0.0446323	0.220274	0.181054	KCND2/DLG2/GRM1/GRIN2A	4
GO:0010923	negative regulation of phosphatase activity	3/263	50/16374	0.0462007	0.220274	0.181054	DLG2/RIMBP2/TMEM132D	3
GO:0031532	actin cytoskeleton reorganization	4/263	84/16374	0.0462964	0.220274	0.181054	PHACTR1/AUTS2/SIPA1L1/PTK2B	4
GO:0001936	regulation of endothelial cell proliferation	1/263	3/16374	0.0474192	0.220274	0.181054	ALDH1A2	1
GO:0003249	cell proliferation involved in heart valve morphogenesis	1/263	3/16374	0.0474192	0.220274	0.181054	BMPR2	1
GO:0003321	positive regulation of blood pressure by epinephrine-norepinephrine	1/263	3/16374	0.0474192	0.220274	0.181054	ADRA1A	1
GO:0007176	regulation of epidermal growth factor-activated receptor activity	1/263	3/16374	0.0474192	0.220274	0.181054	NCK2	1
GO:0007412	axon target recognition	1/263	3/16374	0.0474192	0.220274	0.181054	STXBP1	1
GO:0014016	neuroblast differentiation	1/263	3/16374	0.0474192	0.220274	0.181054	FAM19A1	1
GO:0014050	negative regulation of glutamate secretion	1/263	3/16374	0.0474192	0.220274	0.181054	GRM7	1
GO:0014809	regulation of skeletal muscle contraction by regulation of release of sequestered calcium ion	1/263	3/16374	0.0474192	0.220274	0.181054	DMD	1
GO:0014916	regulation of lung blood pressure	1/263	3/16374	0.0474192	0.220274	0.181054	BMPR2	1
GO:0015888	thiamine transport	1/263	3/16374	0.0474192	0.220274	0.181054	SLC35F3	1
GO:0021564	vagus nerve development	1/263	3/16374	0.0474192	0.220274	0.181054	PLXNA4	1
GO:0021965	spinal cord ventral commissure morphogenesis	1/263	3/16374	0.0474192	0.220274	0.181054	ADARB1	1
GO:0033058	directional locomotion	1/263	3/16374	0.0474192	0.220274	0.181054	GRIN2A	1
GO:0034112	positive regulation of homotypic cell-cell adhesion	1/263	3/16374	0.0474192	0.220274	0.181054	ANK3	1
GO:0034204	lipid translocation	1/263	3/16374	0.0474192	0.220274	0.181054	ATP8A2	1
GO:0035542	regulation of SNARE complex assembly	1/263	3/16374	0.0474192	0.220274	0.181054	STXBP1	1
GO:0035544	negative regulation of SNARE complex assembly	1/263	3/16374	0.0474192	0.220274	0.181054	TRIM9	1
GO:0035669	TRAM-dependent toll-like receptor 4 signaling pathway	1/263	3/16374	0.0474192	0.220274	0.181054	PRKCE	1
GO:0044725	chromatin reprogramming in the zygote	1/263	3/16374	0.0474192	0.220274	0.181054	TET3	1
GO:0045163	clustering of voltage-gated potassium channels	1/263	3/16374	0.0474192	0.220274	0.181054	CNTNAP2	1
GO:0045200	establishment of neuroblast polarity	1/263	3/16374	0.0474192	0.220274	0.181054	FGF13	1
GO:0046320	regulation of fatty acid oxidation	1/263	3/16374	0.0474192	0.220274	0.181054	PRKAG2	1
GO:0046882	negative regulation of follicle-stimulating hormone secretion	1/263	3/16374	0.0474192	0.220274	0.181054	INHBA	1
GO:0048486	parasympathetic nervous system development	1/263	3/16374	0.0474192	0.220274	0.181054	PLXNA4	1
GO:0048682	sprouting of injured axon	1/263	3/16374	0.0474192	0.220274	0.181054	TNR	1
GO:0048742	regulation of skeletal muscle fiber development	1/263	3/16374	0.0474192	0.220274	0.181054	HDAC9	1
GO:0051284	positive regulation of sequestering of calcium ion	1/263	3/16374	0.0474192	0.220274	0.181054	RYR2	1
GO:0051835	positive regulation of synapse structural plasticity	1/263	3/16374	0.0474192	0.220274	0.181054	FRMPD4	1
GO:0055094	response to lipoprotein particle	1/263	3/16374	0.0474192	0.220274	0.181054	CDH13	1
GO:0055096	low-density lipoprotein particle mediated signaling	1/263	3/16374	0.0474192	0.220274	0.181054	CDH13	1
GO:0060025	regulation of synaptic activity	1/263	3/16374	0.0474192	0.220274	0.181054	SYBU	1
GO:0060988	lipid tube assembly	1/263	3/16374	0.0474192	0.220274	0.181054	SH3GL2	1
GO:0061092	positive regulation of phospholipid translocation	1/263	3/16374	0.0474192	0.220274	0.181054	ATP8A2	1
GO:0061364	apoptotic process involved in luteolysis	1/263	3/16374	0.0474192	0.220274	0.181054	SLIT3	1
GO:0061535	glutamate secretion, neurotransmission	1/263	3/16374	0.0474192	0.220274	0.181054	STXBP1	1
GO:0070995	NADPH oxidation	1/263	3/16374	0.0474192	0.220274	0.181054	KCNAB2	1
GO:0071402	cellular response to lipoprotein particle stimulus	1/263	3/16374	0.0474192	0.220274	0.181054	CDH13	1
GO:0072102	glomerulus morphogenesis	1/263	3/16374	0.0474192	0.220274	0.181054	KIRREL3	1
GO:0090292	nuclear matrix anchoring at nuclear membrane	1/263	3/16374	0.0474192	0.220274	0.181054	SYNE1	1
GO:0097155	fasciculation of sensory neuron axon	1/263	3/16374	0.0474192	0.220274	0.181054	EPHA4	1
GO:0097195	pilomotor reflex	1/263	3/16374	0.0474192	0.220274	0.181054	ADRA1A	1
GO:0097477	lateral motor column neuron migration	1/263	3/16374	0.0474192	0.220274	0.181054	DAB1	1
GO:0098877	neurotransmitter receptor transport to plasma membrane	1/263	3/16374	0.0474192	0.220274	0.181054	SNAP25	1
GO:0098904	regulation of AV node cell action potential	1/263	3/16374	0.0474192	0.220274	0.181054	RYR2	1
GO:0098910	regulation of atrial cardiac muscle cell action potential	1/263	3/16374	0.0474192	0.220274	0.181054	RYR2	1
GO:0098912	membrane depolarization during atrial cardiac muscle cell action potential	1/263	3/16374	0.0474192	0.220274	0.181054	CACNA1C	1
GO:0098967	exocytic insertion of neurotransmitter receptor to postsynaptic membrane	1/263	3/16374	0.0474192	0.220274	0.181054	SNAP25	1
GO:0099152	regulation of neurotransmitter receptor transport, endosome to postsynaptic membrane	1/263	3/16374	0.0474192	0.220274	0.181054	ARHGAP44	1
GO:0099525	presynaptic dense core vesicle exocytosis	1/263	3/16374	0.0474192	0.220274	0.181054	STXBP1	1
GO:0120011	intermembrane sterol transfer	1/263	3/16374	0.0474192	0.220274	0.181054	GRAMD1B	1
GO:1900451	positive regulation of glutamate receptor signaling pathway	1/263	3/16374	0.0474192	0.220274	0.181054	UNC13A	1
GO:1902306	negative regulation of sodium ion transmembrane transport	1/263	3/16374	0.0474192	0.220274	0.181054	NEDD4L	1
GO:1902692	regulation of neuroblast proliferation	1/263	3/16374	0.0474192	0.220274	0.181054	FAM19A1	1
GO:1902731	negative regulation of chondrocyte proliferation	1/263	3/16374	0.0474192	0.220274	0.181054	BMPR2	1
GO:1902951	negative regulation of dendritic spine maintenance	1/263	3/16374	0.0474192	0.220274	0.181054	GRIN2B	1
GO:1902988	neurofibrillary tangle assembly	1/263	3/16374	0.0474192	0.220274	0.181054	SORL1	1
GO:1903421	regulation of synaptic vesicle recycling	1/263	3/16374	0.0474192	0.220274	0.181054	FGF14	1
GO:1903527	positive regulation of membrane tubulation	1/263	3/16374	0.0474192	0.220274	0.181054	SH3GL2	1
GO:1903539	protein localization to postsynaptic membrane	1/263	3/16374	0.0474192	0.220274	0.181054	GRIN2A	1
GO:1904717	regulation of AMPA glutamate receptor clustering	1/263	3/16374	0.0474192	0.220274	0.181054	SHISA6	1
GO:1905205	positive regulation of connective tissue replacement	1/263	3/16374	0.0474192	0.220274	0.181054	PPP3CA	1
GO:1905244	regulation of modification of synaptic structure	1/263	3/16374	0.0474192	0.220274	0.181054	EPHA4	1
GO:2000050	regulation of non-canonical Wnt signaling pathway	1/263	3/16374	0.0474192	0.220274	0.181054	TIAM1	1
GO:2000058	regulation of ubiquitin-dependent protein catabolic process	1/263	3/16374	0.0474192	0.220274	0.181054	PTK2B	1
GO:2000195	negative regulation of female gonad development	1/263	3/16374	0.0474192	0.220274	0.181054	ZFPM2	1
GO:2000381	negative regulation of mesoderm development	1/263	3/16374	0.0474192	0.220274	0.181054	RPS6KA6	1
GO:2001288	positive regulation of caveolin-mediated endocytosis	1/263	3/16374	0.0474192	0.220274	0.181054	NEDD4L	1
GO:0010975	regulation of neuron projection development	2/263	22/16374	0.0480779	0.22106	0.181701	ZNF804A/SNAP25	2
GO:0035584	calcium-mediated signaling using intracellular calcium source	2/263	22/16374	0.0480779	0.22106	0.181701	RYR2/GRM5	2
GO:0045807	positive regulation of endocytosis	2/263	22/16374	0.0480779	0.22106	0.181701	PPP3CA/NEDD4L	2
GO:0046716	muscle cell cellular homeostasis	2/263	22/16374	0.0480779	0.22106	0.181701	DMD/LARGE1	2
GO:0045860	positive regulation of protein kinase activity	3/263	51/16374	0.0485257	0.22199	0.182465	PRKAG2/DAB1/PTK2B	3
GO:0050806	positive regulation of synaptic transmission	3/263	51/16374	0.0485257	0.22199	0.182465	EPHA4/SYT1/GRIN2A	3
GO:0007420	brain development	9/263	295/16374	0.0492765	0.224855	0.18482	ARNT2/PPP3CA/ALDH1A2/BMPR2/SYT1/CNTNAP2/GRIN2B/GRIN2A/CA10	9
GO:0030838	positive regulation of actin filament polymerization	3/263	52/16374	0.0509071	0.231711	0.190455	NCK2/PRKCE/PTK2B	3
GO:0006904	vesicle docking involved in exocytosis	2/263	23/16374	0.0521119	0.234244	0.192537	STXBP1/CAMK2A	2
GO:0033137	negative regulation of peptidyl-serine phosphorylation	2/263	23/16374	0.0521119	0.234244	0.192537	NCK2/DMD	2
GO:0035902	response to immobilization stress	2/263	23/16374	0.0521119	0.234244	0.192537	SLC8A1/PTK2B	2
GO:0048747	muscle fiber development	2/263	23/16374	0.0521119	0.234244	0.192537	HDAC9/DMD	2
GO:0098742	cell-cell adhesion via plasma-membrane adhesion molecules	2/263	23/16374	0.0521119	0.234244	0.192537	TENM3/UNC5D	2
GO:0001667	ameboidal-type cell migration	4/263	88/16374	0.0532943	0.238597	0.196115	BMPR2/SLC8A1/PRKCE/PAK3	4
GO:1903779	regulation of cardiac conduction	3/263	53/16374	0.0533444	0.238597	0.196115	ATP2B2/SLC8A1/RYR2	3
GO:0000380	alternative mRNA splicing, via spliceosome	3/263	54/16374	0.0558368	0.243217	0.199913	RBFOX2/CELF4/CELF5	3
GO:0007600	sensory perception	3/263	54/16374	0.0558368	0.243217	0.199913	GRM1/GRIN2A/ASIC2	3
GO:0009725	response to hormone	3/263	54/16374	0.0558368	0.243217	0.199913	SNRPN/ADRA1A/PTK2B	3
GO:0050877	nervous system process	3/263	54/16374	0.0558368	0.243217	0.199913	KCND2/ANK3/TNR	3
GO:0014808	release of sequestered calcium ion into cytosol by sarcoplasmic reticulum	2/263	24/16374	0.056262	0.243217	0.199913	RYR2/DMD	2
GO:0032958	inositol phosphate biosynthetic process	2/263	24/16374	0.056262	0.243217	0.199913	HRH1/PTK2B	2
GO:0035050	embryonic heart tube development	2/263	24/16374	0.056262	0.243217	0.199913	RYR2/ACVR1	2
GO:0045907	positive regulation of vasoconstriction	2/263	24/16374	0.056262	0.243217	0.199913	HRH1/ADRA1A	2
GO:0060113	inner ear receptor cell differentiation	2/263	24/16374	0.056262	0.243217	0.199913	ATP8B1/GABRB3	2
GO:0060119	inner ear receptor cell development	2/263	24/16374	0.056262	0.243217	0.199913	ATP8B1/GABRB3	2
GO:0070296	sarcoplasmic reticulum calcium ion transport	2/263	24/16374	0.056262	0.243217	0.199913	RYR2/DMD	2
GO:0003009	skeletal muscle contraction	2/263	25/16374	0.0605235	0.243217	0.199913	DMD/HOMER1	2
GO:0055117	regulation of cardiac muscle contraction	2/263	25/16374	0.0605235	0.243217	0.199913	FGF13/RYR2	2
GO:0002520	immune system development	1/263	4/16374	0.0627224	0.243217	0.199913	CACNA1C	1
GO:0003105	negative regulation of glomerular filtration	1/263	4/16374	0.0627224	0.243217	0.199913	PTPRO	1
GO:0003274	endocardial cushion fusion	1/263	4/16374	0.0627224	0.243217	0.199913	ACVR1	1
GO:0006382	adenosine to inosine editing	1/263	4/16374	0.0627224	0.243217	0.199913	ADARB1	1
GO:0010499	proteasomal ubiquitin-independent protein catabolic process	1/263	4/16374	0.0627224	0.243217	0.199913	ENC1	1
GO:0010724	regulation of definitive erythrocyte differentiation	1/263	4/16374	0.0627224	0.243217	0.199913	RBFOX2	1
GO:0010735	positive regulation of transcription via serum response element binding	1/263	4/16374	0.0627224	0.243217	0.199913	MICAL2	1
GO:0010807	regulation of synaptic vesicle priming	1/263	4/16374	0.0627224	0.243217	0.199913	STXBP1	1
GO:0016048	detection of temperature stimulus	1/263	4/16374	0.0627224	0.243217	0.199913	ANO3	1
GO:0021615	glossopharyngeal nerve morphogenesis	1/263	4/16374	0.0627224	0.243217	0.199913	PLXNA4	1
GO:0021759	globus pallidus development	1/263	4/16374	0.0627224	0.243217	0.199913	KCNC2	1
GO:0021773	striatal medium spiny neuron differentiation	1/263	4/16374	0.0627224	0.243217	0.199913	INHBA	1
GO:0022029	telencephalon cell migration	1/263	4/16374	0.0627224	0.243217	0.199913	TNR	1
GO:0030104	water homeostasis	1/263	4/16374	0.0627224	0.243217	0.199913	NEDD4L	1
GO:0031427	response to methotrexate	1/263	4/16374	0.0627224	0.243217	0.199913	DHFR	1
GO:0035022	positive regulation of Rac protein signal transduction	1/263	4/16374	0.0627224	0.243217	0.199913	AUTS2	1
GO:0035585	calcium-mediated signaling using extracellular calcium source	1/263	4/16374	0.0627224	0.243217	0.199913	CACNA1C	1
GO:0035609	C-terminal protein deglutamylation	1/263	4/16374	0.0627224	0.243217	0.199913	AGBL4	1
GO:0035799	ureter maturation	1/263	4/16374	0.0627224	0.243217	0.199913	ALDH1A2	1
GO:0042701	progesterone secretion	1/263	4/16374	0.0627224	0.243217	0.199913	INHBA	1
GO:0042904	9-cis-retinoic acid biosynthetic process	1/263	4/16374	0.0627224	0.243217	0.199913	ALDH1A2	1
GO:0043266	regulation of potassium ion transport	1/263	4/16374	0.0627224	0.243217	0.199913	ANK3	1
GO:0045077	negative regulation of interferon-gamma biosynthetic process	1/263	4/16374	0.0627224	0.243217	0.199913	INHBA	1
GO:0045906	negative regulation of vasoconstriction	1/263	4/16374	0.0627224	0.243217	0.199913	BMPR2	1
GO:0048677	axon extension involved in regeneration	1/263	4/16374	0.0627224	0.243217	0.199913	TNR	1
GO:0050974	detection of mechanical stimulus involved in sensory perception	1/263	4/16374	0.0627224	0.243217	0.199913	ASIC2	1
GO:0051414	response to cortisol	1/263	4/16374	0.0627224	0.243217	0.199913	SLIT3	1
GO:0051645	Golgi localization	1/263	4/16374	0.0627224	0.243217	0.199913	DAB1	1
GO:0060267	positive regulation of respiratory burst	1/263	4/16374	0.0627224	0.243217	0.199913	CAMK1D	1
GO:0060421	positive regulation of heart growth	1/263	4/16374	0.0627224	0.243217	0.199913	BASP1	1
GO:0061502	early endosome to recycling endosome transport	1/263	4/16374	0.0627224	0.243217	0.199913	SORL1	1
GO:0061744	motor behavior	1/263	4/16374	0.0627224	0.243217	0.199913	ADARB1	1
GO:0090036	regulation of protein kinase C signaling	1/263	4/16374	0.0627224	0.243217	0.199913	SEZ6L	1
GO:0097688	glutamate receptor clustering	1/263	4/16374	0.0627224	0.243217	0.199913	SHISA6	1
GO:0097709	connective tissue replacement	1/263	4/16374	0.0627224	0.243217	0.199913	PPP3CA	1
GO:0099558	maintenance of synapse structure	1/263	4/16374	0.0627224	0.243217	0.199913	ADGRB3	1
GO:0099562	maintenance of postsynaptic density structure	1/263	4/16374	0.0627224	0.243217	0.199913	DLG2	1
GO:0099639	neurotransmitter receptor transport, endosome to plasma membrane	1/263	4/16374	0.0627224	0.243217	0.199913	ARHGAP44	1
GO:0099703	induction of synaptic vesicle exocytosis by positive regulation of presynaptic cytosolic calcium ion concentration	1/263	4/16374	0.0627224	0.243217	0.199913	CACNA1D	1
GO:1901385	regulation of voltage-gated calcium channel activity	1/263	4/16374	0.0627224	0.243217	0.199913	DMD	1
GO:1901896	positive regulation of ATPase-coupled calcium transmembrane transporter activity	1/263	4/16374	0.0627224	0.243217	0.199913	RYR2	1
GO:1902108	regulation of mitochondrial membrane permeability involved in apoptotic process	1/263	4/16374	0.0627224	0.243217	0.199913	CAMK2A	1
GO:1902950	regulation of dendritic spine maintenance	1/263	4/16374	0.0627224	0.243217	0.199913	HOMER1	1
GO:1902952	positive regulation of dendritic spine maintenance	1/263	4/16374	0.0627224	0.243217	0.199913	ZNF804A	1
GO:1902953	positive regulation of ER to Golgi vesicle-mediated transport	1/263	4/16374	0.0627224	0.243217	0.199913	SORL1	1
GO:1902991	regulation of amyloid precursor protein catabolic process	1/263	4/16374	0.0627224	0.243217	0.199913	UNC13A	1
GO:1903540	establishment of protein localization to postsynaptic membrane	1/263	4/16374	0.0627224	0.243217	0.199913	SNAP25	1
GO:1903912	negative regulation of endoplasmic reticulum stress-induced eIF2 alpha phosphorylation	1/263	4/16374	0.0627224	0.243217	0.199913	NCK2	1
GO:1990441	negative regulation of transcription from RNA polymerase II promoter in response to endoplasmic reticulum stress	1/263	4/16374	0.0627224	0.243217	0.199913	NCK2	1
GO:0034394	protein localization to cell surface	3/263	57/16374	0.0636394	0.245195	0.201538	NEDD4L/BDNF/KCNAB2	3
GO:0051592	response to calcium ion	3/263	57/16374	0.0636394	0.245195	0.201538	PPP3CA/HOMER1/PTK2B	3
GO:0071897	DNA biosynthetic process	3/263	57/16374	0.0636394	0.245195	0.201538	BMPR2/PAK3/PTK2B	3
GO:0001954	positive regulation of cell-matrix adhesion	2/263	26/16374	0.0648916	0.246343	0.202481	CDH13/PTK2B	2
GO:0007205	protein kinase C-activating G protein-coupled receptor signaling pathway	2/263	26/16374	0.0648916	0.246343	0.202481	DGKB/DGKI	2
GO:0031102	neuron projection regeneration	2/263	26/16374	0.0648916	0.246343	0.202481	EPHA4/RTN4RL1	2
GO:0045216	cell-cell junction organization	2/263	26/16374	0.0648916	0.246343	0.202481	NLGN4X/SDK1	2
GO:0060037	pharyngeal system development	2/263	26/16374	0.0648916	0.246343	0.202481	BMPR2/ACVR1	2
GO:0071377	cellular response to glucagon stimulus	2/263	26/16374	0.0648916	0.246343	0.202481	PRKAR1B/ADCY9	2
GO:0099560	synaptic membrane adhesion	2/263	26/16374	0.0648916	0.246343	0.202481	LRRC4C/LRFN5	2
GO:0014902	myotube differentiation	3/263	59/16374	0.0691057	0.254507	0.209192	ADGRB3/BDNF/KCNH1	3
GO:0003148	outflow tract septum morphogenesis	2/263	27/16374	0.0693619	0.254507	0.209192	BMPR2/ZFPM2	2
GO:0003197	endocardial cushion development	2/263	27/16374	0.0693619	0.254507	0.209192	BMPR2/ACVR1	2
GO:0035567	non-canonical Wnt signaling pathway	2/263	27/16374	0.0693619	0.254507	0.209192	MLLT3/TIAM1	2
GO:0042982	amyloid precursor protein metabolic process	2/263	27/16374	0.0693619	0.254507	0.209192	SPON1/UNC13A	2
GO:0051924	regulation of calcium ion transport	2/263	27/16374	0.0693619	0.254507	0.209192	CAMK2B/CACNA1B	2
GO:0061049	cell growth involved in cardiac muscle cell development	2/263	27/16374	0.0693619	0.254507	0.209192	ADRA1A/SORBS2	2
GO:0098664	G protein-coupled serotonin receptor signaling pathway	2/263	27/16374	0.0693619	0.254507	0.209192	HRH1/HTR4	2
GO:1905606	regulation of presynapse assembly	2/263	27/16374	0.0693619	0.254507	0.209192	LRFN5/CBLN2	2
GO:0014070	response to organic cyclic compound	3/263	60/16374	0.0719161	0.254507	0.209192	HOMER1/SDK1/KCNC2	3
GO:0017148	negative regulation of translation	3/263	60/16374	0.0719161	0.254507	0.209192	ENC1/DHFR/CELF4	3
GO:0007628	adult walking behavior	2/263	28/16374	0.07393	0.254507	0.209192	EPHA4/DAB1	2
GO:0008306	associative learning	2/263	28/16374	0.07393	0.254507	0.209192	SNAP25/TNR	2
GO:0097485	neuron projection guidance	2/263	28/16374	0.07393	0.254507	0.209192	EPHA4/SLIT3	2
GO:0008104	protein localization	8/263	273/16374	0.0740925	0.254507	0.209192	NIN/TBC1D1/MAP2/NSF/NBEA/RIMS2/AP3B2/RIMS1	8
GO:0006941	striated muscle contraction	3/263	61/16374	0.0747771	0.254507	0.209192	ADRA1A/RYR2/DMD	3
GO:0019933	cAMP-mediated signaling	3/263	61/16374	0.0747771	0.254507	0.209192	PCLO/RIMS2/RAPGEF4	3
GO:0046785	microtubule polymerization	3/263	61/16374	0.0747771	0.254507	0.209192	NIN/MAP2/FGF13	3
GO:0003093	regulation of glomerular filtration	1/263	5/16374	0.0777807	0.254507	0.209192	PTPRO	1
GO:0003175	tricuspid valve development	1/263	5/16374	0.0777807	0.254507	0.209192	BMPR2	1
GO:0003186	tricuspid valve morphogenesis	1/263	5/16374	0.0777807	0.254507	0.209192	BMPR2	1
GO:0003289	atrial septum primum morphogenesis	1/263	5/16374	0.0777807	0.254507	0.209192	ACVR1	1
GO:0006172	ADP biosynthetic process	1/263	5/16374	0.0777807	0.254507	0.209192	AK5	1
GO:0006621	protein retention in ER lumen	1/263	5/16374	0.0777807	0.254507	0.209192	GRIK5	1
GO:0007356	thorax and anterior abdomen determination	1/263	5/16374	0.0777807	0.254507	0.209192	BASP1	1
GO:0009628	response to abiotic stimulus	1/263	5/16374	0.0777807	0.254507	0.209192	STRBP	1
GO:0010649	regulation of cell communication by electrical coupling	1/263	5/16374	0.0777807	0.254507	0.209192	SLC8A1	1
GO:0010656	negative regulation of muscle cell apoptotic process	1/263	5/16374	0.0777807	0.254507	0.209192	PTK2B	1
GO:0010970	transport along microtubule	1/263	5/16374	0.0777807	0.254507	0.209192	MAP2	1
GO:0014819	regulation of skeletal muscle contraction	1/263	5/16374	0.0777807	0.254507	0.209192	DMD	1
GO:0015693	magnesium ion transport	1/263	5/16374	0.0777807	0.254507	0.209192	TUSC3	1
GO:0015917	aminophospholipid transport	1/263	5/16374	0.0777807	0.254507	0.209192	ATP8B1	1
GO:0016191	synaptic vesicle uncoating	1/263	5/16374	0.0777807	0.254507	0.209192	SH3GL2	1
GO:0021563	glossopharyngeal nerve development	1/263	5/16374	0.0777807	0.254507	0.209192	PLXNA4	1
GO:0021636	trigeminal nerve morphogenesis	1/263	5/16374	0.0777807	0.254507	0.209192	PLXNA4	1
GO:0021637	trigeminal nerve structural organization	1/263	5/16374	0.0777807	0.254507	0.209192	PLXNA4	1
GO:0021650	vestibulocochlear nerve formation	1/263	5/16374	0.0777807	0.254507	0.209192	ATP8B1	1
GO:0021960	anterior commissure morphogenesis	1/263	5/16374	0.0777807	0.254507	0.209192	PLXNA4	1
GO:0031914	negative regulation of synaptic plasticity	1/263	5/16374	0.0777807	0.254507	0.209192	UNC13C	1
GO:0032534	regulation of microvillus assembly	1/263	5/16374	0.0777807	0.254507	0.209192	ATP8B1	1
GO:0034721	histone H3-K4 demethylation, trimethyl-H3-K4-specific	1/263	5/16374	0.0777807	0.254507	0.209192	JARID2	1
GO:0035610	protein side chain deglutamylation	1/263	5/16374	0.0777807	0.254507	0.209192	AGBL4	1
GO:0036491	regulation of translation initiation in response to endoplasmic reticulum stress	1/263	5/16374	0.0777807	0.254507	0.209192	NCK2	1
GO:0044206	UMP salvage	1/263	5/16374	0.0777807	0.254507	0.209192	UPP2	1
GO:0045026	plasma membrane fusion	1/263	5/16374	0.0777807	0.254507	0.209192	NSF	1
GO:0045578	negative regulation of B cell differentiation	1/263	5/16374	0.0777807	0.254507	0.209192	INHBA	1
GO:0045760	positive regulation of action potential	1/263	5/16374	0.0777807	0.254507	0.209192	ADRA1A	1
GO:0045838	positive regulation of membrane potential	1/263	5/16374	0.0777807	0.254507	0.209192	ANK3	1
GO:0046069	cGMP catabolic process	1/263	5/16374	0.0777807	0.254507	0.209192	PDE1A	1
GO:0046486	glycerolipid metabolic process	1/263	5/16374	0.0777807	0.254507	0.209192	DGKB	1
GO:0046654	tetrahydrofolate biosynthetic process	1/263	5/16374	0.0777807	0.254507	0.209192	DHFR	1
GO:0050915	sensory perception of sour taste	1/263	5/16374	0.0777807	0.254507	0.209192	ASIC2	1
GO:0050951	sensory perception of temperature stimulus	1/263	5/16374	0.0777807	0.254507	0.209192	BTBD9	1
GO:0050982	detection of mechanical stimulus	1/263	5/16374	0.0777807	0.254507	0.209192	ANO3	1
GO:0051179	localization	1/263	5/16374	0.0777807	0.254507	0.209192	GRIK5	1
GO:0051823	regulation of synapse structural plasticity	1/263	5/16374	0.0777807	0.254507	0.209192	CAMK2B	1
GO:0060318	definitive erythrocyte differentiation	1/263	5/16374	0.0777807	0.254507	0.209192	RBFOX2	1
GO:0060385	axonogenesis involved in innervation	1/263	5/16374	0.0777807	0.254507	0.209192	COL25A1	1
GO:0060923	cardiac muscle cell fate commitment	1/263	5/16374	0.0777807	0.254507	0.209192	ACVR1	1
GO:0061590	calcium activated phosphatidylcholine scrambling	1/263	5/16374	0.0777807	0.254507	0.209192	ANO3	1
GO:0061591	calcium activated galactosylceramide scrambling	1/263	5/16374	0.0777807	0.254507	0.209192	ANO3	1
GO:0061743	motor learning	1/263	5/16374	0.0777807	0.254507	0.209192	ADGRB3	1
GO:0071205	protein localization to juxtaparanode region of axon	1/263	5/16374	0.0777807	0.254507	0.209192	CNTNAP2	1
GO:0086045	membrane depolarization during AV node cell action potential	1/263	5/16374	0.0777807	0.254507	0.209192	CACNA1C	1
GO:0086046	membrane depolarization during SA node cell action potential	1/263	5/16374	0.0777807	0.254507	0.209192	CACNA1D	1
GO:0090286	obsolete cytoskeletal anchoring at nuclear membrane	1/263	5/16374	0.0777807	0.254507	0.209192	SYNE1	1
GO:0097154	GABAergic neuron differentiation	1/263	5/16374	0.0777807	0.254507	0.209192	INHBA	1
GO:0098815	modulation of excitatory postsynaptic potential	1/263	5/16374	0.0777807	0.254507	0.209192	TMEM108	1
GO:1900020	positive regulation of protein kinase C activity	1/263	5/16374	0.0777807	0.254507	0.209192	CEMIP	1
GO:1901843	positive regulation of high voltage-gated calcium channel activity	1/263	5/16374	0.0777807	0.254507	0.209192	FGF14	1
GO:1902083	negative regulation of peptidyl-cysteine S-nitrosylation	1/263	5/16374	0.0777807	0.254507	0.209192	DMD	1
GO:1902513	regulation of organelle transport along microtubule	1/263	5/16374	0.0777807	0.254507	0.209192	MAP2	1
GO:1903898	negative regulation of PERK-mediated unfolded protein response	1/263	5/16374	0.0777807	0.254507	0.209192	NCK2	1
GO:1905007	positive regulation of epithelial to mesenchymal transition involved in endocardial cushion formation	1/263	5/16374	0.0777807	0.254507	0.209192	ACVR1	1
GO:2001137	positive regulation of endocytic recycling	1/263	5/16374	0.0777807	0.254507	0.209192	SORL1	1
GO:0010800	positive regulation of peptidyl-threonine phosphorylation	2/263	29/16374	0.0785917	0.254507	0.209192	PRKAG2/CEMIP	2
GO:0034109	homotypic cell-cell adhesion	2/263	29/16374	0.0785917	0.254507	0.209192	MEGF11/ANK3	2
GO:0046676	negative regulation of insulin secretion	2/263	29/16374	0.0785917	0.254507	0.209192	PPP3CA/STXBP5L	2
GO:0051930	regulation of sensory perception of pain	2/263	29/16374	0.0785917	0.254507	0.209192	GRM1/GRIN2A	2
GO:0070252	actin-mediated cell contraction	2/263	29/16374	0.0785917	0.254507	0.209192	CACNA1D/CACNA1C	2
GO:0070528	protein kinase C signaling	2/263	29/16374	0.0785917	0.254507	0.209192	ADRA1A/SEZ6L	2
GO:0086003	cardiac muscle cell contraction	2/263	29/16374	0.0785917	0.254507	0.209192	CACNA1D/CACNA1C	2
GO:0030182	neuron differentiation	8/263	277/16374	0.0790688	0.255594	0.210086	ATP2B2/NLGN4X/ALDH1A2/MAP2/TIAM1/HDAC9/MYT1L/DAB1	8
GO:0031214	biomineral tissue development	4/263	102/16374	0.0819988	0.264593	0.217482	BMPR2/SLC8A1/ACVR1/PTK2B	4
GO:0007202	activation of phospholipase C activity	2/263	30/16374	0.0833427	0.267496	0.219868	ADRA1A/BDNF	2
GO:0051480	regulation of cytosolic calcium ion concentration	2/263	30/16374	0.0833427	0.267496	0.219868	ATP2B2/RYR2	2
GO:0090314	positive regulation of protein targeting to membrane	2/263	30/16374	0.0833427	0.267496	0.219868	ANK3/CEMIP	2
GO:0007528	neuromuscular junction development	2/263	31/16374	0.0881791	0.27852	0.22893	KALRN/ANK3	2
GO:0008089	anterograde axonal transport	2/263	31/16374	0.0881791	0.27852	0.22893	MAP2/AP3B2	2
GO:0048729	tissue morphogenesis	2/263	31/16374	0.0881791	0.27852	0.22893	BMPR2/ACVR1	2
GO:0007010	cytoskeleton organization	8/263	284/16374	0.0882471	0.27852	0.22893	PCLO/NCK2/FHOD3/DMD/MICAL2/SIPA1L3/DIAPH2/SORBS2	8
GO:0030282	bone mineralization	4/263	105/16374	0.0889713	0.27852	0.22893	BMPR2/SLC8A1/ACVR1/PTK2B	4
GO:0001976	nervous system process involved in regulation of systemic arterial blood pressure	1/263	6/16374	0.0925979	0.27852	0.22893	ASIC2	1
GO:0002090	regulation of receptor internalization	1/263	6/16374	0.0925979	0.27852	0.22893	SH3GL2	1
GO:0002138	retinoic acid biosynthetic process	1/263	6/16374	0.0925979	0.27852	0.22893	ALDH1A2	1
GO:0003284	septum primum development	1/263	6/16374	0.0925979	0.27852	0.22893	ACVR1	1
GO:0006729	tetrahydrobiopterin biosynthetic process	1/263	6/16374	0.0925979	0.27852	0.22893	DHFR	1
GO:0007196	adenylate cyclase-inhibiting G protein-coupled glutamate receptor signaling pathway	1/263	6/16374	0.0925979	0.27852	0.22893	GRM7	1
GO:0007354	zygotic determination of anterior/posterior axis, embryo	1/263	6/16374	0.0925979	0.27852	0.22893	BASP1	1
GO:0010657	muscle cell apoptotic process	1/263	6/16374	0.0925979	0.27852	0.22893	PTK2B	1
GO:0014910	regulation of smooth muscle cell migration	1/263	6/16374	0.0925979	0.27852	0.22893	SORL1	1
GO:0021540	corpus callosum morphogenesis	1/263	6/16374	0.0925979	0.27852	0.22893	NIN	1
GO:0021785	branchiomotor neuron axon guidance	1/263	6/16374	0.0925979	0.27852	0.22893	PLXNA4	1
GO:0031547	brain-derived neurotrophic factor receptor signaling pathway	1/263	6/16374	0.0925979	0.27852	0.22893	BDNF	1
GO:0032229	negative regulation of synaptic transmission, GABAergic	1/263	6/16374	0.0925979	0.27852	0.22893	STXBP1	1
GO:0032962	positive regulation of inositol trisphosphate biosynthetic process	1/263	6/16374	0.0925979	0.27852	0.22893	HRH1	1
GO:0035502	metanephric part of ureteric bud development	1/263	6/16374	0.0925979	0.27852	0.22893	BASP1	1
GO:0035965	cardiolipin acyl-chain remodeling	1/263	6/16374	0.0925979	0.27852	0.22893	LCLAT1	1
GO:0036092	phosphatidylinositol-3-phosphate biosynthetic process	1/263	6/16374	0.0925979	0.27852	0.22893	INPP4A	1
GO:0036492	eiF2alpha phosphorylation in response to endoplasmic reticulum stress	1/263	6/16374	0.0925979	0.27852	0.22893	NCK2	1
GO:0044091	membrane biogenesis	1/263	6/16374	0.0925979	0.27852	0.22893	ANK3	1
GO:0046881	positive regulation of follicle-stimulating hormone secretion	1/263	6/16374	0.0925979	0.27852	0.22893	INHBA	1
GO:0051005	negative regulation of lipoprotein lipase activity	1/263	6/16374	0.0925979	0.27852	0.22893	HDAC9	1
GO:0051971	positive regulation of transmission of nerve impulse	1/263	6/16374	0.0925979	0.27852	0.22893	TNR	1
GO:0060372	regulation of atrial cardiac muscle cell membrane repolarization	1/263	6/16374	0.0925979	0.27852	0.22893	CACNA1D	1
GO:0060836	lymphatic endothelial cell differentiation	1/263	6/16374	0.0925979	0.27852	0.22893	BMPR2	1
GO:0061312	BMP signaling pathway involved in heart development	1/263	6/16374	0.0925979	0.27852	0.22893	ACVR1	1
GO:0070257	positive regulation of mucus secretion	1/263	6/16374	0.0925979	0.27852	0.22893	PRKCE	1
GO:0070778	L-aspartate transmembrane transport	1/263	6/16374	0.0925979	0.27852	0.22893	SLC25A18	1
GO:0072178	nephric duct morphogenesis	1/263	6/16374	0.0925979	0.27852	0.22893	EPHA4	1
GO:1905274	regulation of modification of postsynaptic actin cytoskeleton	1/263	6/16374	0.0925979	0.27852	0.22893	TIAM1	1
GO:2000121	regulation of removal of superoxide radicals	1/263	6/16374	0.0925979	0.27852	0.22893	DHFR	1
GO:2000480	negative regulation of cAMP-dependent protein kinase activity	1/263	6/16374	0.0925979	0.27852	0.22893	PRKAR1B	1
GO:2000767	positive regulation of cytoplasmic translation	1/263	6/16374	0.0925979	0.27852	0.22893	JAKMIP1	1
GO:0001938	positive regulation of endothelial cell proliferation	3/263	67/16374	0.092963	0.27852	0.22893	CDH13/BMPR2/SEMA5A	3
GO:0003176	aortic valve development	2/263	32/16374	0.0930969	0.27852	0.22893	BMPR2/SLIT3	2
GO:0032835	glomerulus development	2/263	32/16374	0.0930969	0.27852	0.22893	KIRREL3/PTPRO	2
GO:0035282	segmentation	2/263	32/16374	0.0930969	0.27852	0.22893	ALDH1A2/MLLT3	2
GO:0071333	cellular response to glucose stimulus	3/263	68/16374	0.0961566	0.286724	0.235673	PPP3CA/GRIK5/PTPRN2	3
GO:0071772	response to BMP	3/263	68/16374	0.0961566	0.286724	0.235673	BMPR2/RYR2/ACVR1	3
GO:0003091	renal water homeostasis	2/263	33/16374	0.0980923	0.289061	0.237593	PRKAR1B/ADCY9	2
GO:0007009	plasma membrane organization	2/263	33/16374	0.0980923	0.289061	0.237593	ANK3/SH3GL2	2
GO:0007616	long-term memory	2/263	33/16374	0.0980923	0.289061	0.237593	BTBD9/GRIA1	2
GO:0035115	embryonic forelimb morphogenesis	2/263	33/16374	0.0980923	0.289061	0.237593	ALDH1A2/CACNA1C	2
GO:0043403	skeletal muscle tissue regeneration	2/263	33/16374	0.0980923	0.289061	0.237593	PPP3CA/LARGE1	2
GO:0099072	regulation of postsynaptic membrane neurotransmitter receptor levels	2/263	33/16374	0.0980923	0.289061	0.237593	IQSEC2/SNAP25	2
GO:1905314	semi-lunar valve development	2/263	33/16374	0.0980923	0.289061	0.237593	BMPR2/SLIT3	2
GO:0006888	endoplasmic reticulum to Golgi vesicle-mediated transport	5/263	153/16374	0.100635	0.289061	0.237593	SORL1/DYNC1I1/ANK3/NSF/GRIA1	5
GO:0009057	macromolecule catabolic process	4/263	110/16374	0.101202	0.289061	0.237593	SORL1/NEDD4L/NSF/GRIN2A	4
GO:0030029	actin filament-based process	4/263	110/16374	0.101202	0.289061	0.237593	NCK2/FHOD3/DIAPH2/SORBS2	4
GO:1901565	organonitrogen compound catabolic process	4/263	110/16374	0.101202	0.289061	0.237593	SORL1/NEDD4L/NSF/GRIN2A	4
GO:0035295	tube development	5/263	154/16374	0.10273	0.289061	0.237593	ALDH1A2/RYR2/BASP1/ZFPM2/ACVR1	5
GO:0048332	mesoderm morphogenesis	2/263	34/16374	0.103162	0.289061	0.237593	BMPR2/ACVR1	2
GO:0048588	developmental cell growth	2/263	34/16374	0.103162	0.289061	0.237593	FGF13/BDNF	2
GO:0120039	plasma membrane bounded cell projection morphogenesis	2/263	34/16374	0.103162	0.289061	0.237593	TIAM1/EPHA4	2
GO:0003007	heart morphogenesis	4/263	111/16374	0.103737	0.289061	0.237593	ALDH1A2/BMPR2/RYR2/ACVR1	4
GO:0007160	cell-matrix adhesion	5/263	155/16374	0.104848	0.289061	0.237593	CDH13/TIAM1/SNED1/PPFIA2/PTK2B	5
GO:0002040	sprouting angiogenesis	3/263	71/16374	0.106	0.289061	0.237593	CDH13/SEMA5A/PTK2B	3
GO:0021543	pallium development	4/263	112/16374	0.106301	0.289061	0.237593	FGF13/CNTNAP2/KIRREL3/DAB1	4
GO:0042127	regulation of cell population proliferation	4/263	112/16374	0.106301	0.289061	0.237593	RBFOX2/BMPR2/CHST11/KCNH1	4
GO:0070997	neuron death	8/263	297/16374	0.106868	0.289061	0.237593	SORL1/GRIK5/GRIN2B/GABRB3/PPP1R13B/STXBP1/PAK3/PTK2B	8
GO:0001554	luteolysis	1/263	7/16374	0.107178	0.289061	0.237593	SLIT3	1
GO:0001956	positive regulation of neurotransmitter secretion	1/263	7/16374	0.107178	0.289061	0.237593	UNC13A	1
GO:0003360	brainstem development	1/263	7/16374	0.107178	0.289061	0.237593	NLGN4X	1
GO:0006776	vitamin A metabolic process	1/263	7/16374	0.107178	0.289061	0.237593	ALDH1A2	1
GO:0007379	segment specification	1/263	7/16374	0.107178	0.289061	0.237593	MLLT3	1
GO:0008627	intrinsic apoptotic signaling pathway in response to osmotic stress	1/263	7/16374	0.107178	0.289061	0.237593	SCN2A	1
GO:0009642	response to light intensity	1/263	7/16374	0.107178	0.289061	0.237593	KCNC2	1
GO:0010960	magnesium ion homeostasis	1/263	7/16374	0.107178	0.289061	0.237593	ANK3	1
GO:0014883	transition between fast and slow fiber	1/263	7/16374	0.107178	0.289061	0.237593	PPP3CA	1
GO:0016188	synaptic vesicle maturation	1/263	7/16374	0.107178	0.289061	0.237593	STXBP1	1
GO:0017014	protein nitrosylation	1/263	7/16374	0.107178	0.289061	0.237593	DMD	1
GO:0018198	peptidyl-cysteine modification	1/263	7/16374	0.107178	0.289061	0.237593	DMD	1
GO:0019217	regulation of fatty acid metabolic process	1/263	7/16374	0.107178	0.289061	0.237593	PRKAG2	1
GO:0021648	vestibulocochlear nerve morphogenesis	1/263	7/16374	0.107178	0.289061	0.237593	ATP8B1	1
GO:0021859	pyramidal neuron differentiation	1/263	7/16374	0.107178	0.289061	0.237593	UNC5D	1
GO:0032098	regulation of appetite	1/263	7/16374	0.107178	0.289061	0.237593	HTR4	1
GO:0032460	negative regulation of protein oligomerization	1/263	7/16374	0.107178	0.289061	0.237593	SORL1	1
GO:0035385	Roundabout signaling pathway	1/263	7/16374	0.107178	0.289061	0.237593	SLIT3	1
GO:0042297	vocal learning	1/263	7/16374	0.107178	0.289061	0.237593	CNTNAP2	1
GO:0044085	cellular component biogenesis	1/263	7/16374	0.107178	0.289061	0.237593	ANK3	1
GO:0045650	negative regulation of macrophage differentiation	1/263	7/16374	0.107178	0.289061	0.237593	INHBA	1
GO:0045955	negative regulation of calcium ion-dependent exocytosis	1/263	7/16374	0.107178	0.289061	0.237593	TRIM9	1
GO:0046653	tetrahydrofolate metabolic process	1/263	7/16374	0.107178	0.289061	0.237593	DHFR	1
GO:0046884	follicle-stimulating hormone secretion	1/263	7/16374	0.107178	0.289061	0.237593	INHBA	1
GO:0048671	negative regulation of collateral sprouting	1/263	7/16374	0.107178	0.289061	0.237593	FGF13	1
GO:0048672	positive regulation of collateral sprouting	1/263	7/16374	0.107178	0.289061	0.237593	BDNF	1
GO:0048843	negative regulation of axon extension involved in axon guidance	1/263	7/16374	0.107178	0.289061	0.237593	SEMA5A	1
GO:0050996	positive regulation of lipid catabolic process	1/263	7/16374	0.107178	0.289061	0.237593	PRKCE	1
GO:0051574	positive regulation of histone H3-K9 methylation	1/263	7/16374	0.107178	0.289061	0.237593	JARID2	1
GO:0051694	pointed-end actin filament capping	1/263	7/16374	0.107178	0.289061	0.237593	TMOD3	1
GO:0060052	neurofilament cytoskeleton organization	1/263	7/16374	0.107178	0.289061	0.237593	ATP8A2	1
GO:0070100	negative regulation of chemokine-mediated signaling pathway	1/263	7/16374	0.107178	0.289061	0.237593	SLIT3	1
GO:0071286	cellular response to magnesium ion	1/263	7/16374	0.107178	0.289061	0.237593	ANK3	1
GO:0072176	nephric duct development	1/263	7/16374	0.107178	0.289061	0.237593	EPHA4	1
GO:0090647	modulation of age-related behavioral decline	1/263	7/16374	0.107178	0.289061	0.237593	GRM5	1
GO:0097049	motor neuron apoptotic process	1/263	7/16374	0.107178	0.289061	0.237593	ADARB1	1
GO:0098719	sodium ion import across plasma membrane	1/263	7/16374	0.107178	0.289061	0.237593	SLC8A1	1
GO:0099505	regulation of presynaptic membrane potential	1/263	7/16374	0.107178	0.289061	0.237593	KCNC2	1
GO:0099563	modification of synaptic structure	1/263	7/16374	0.107178	0.289061	0.237593	EPHA4	1
GO:0099624	atrial cardiac muscle cell membrane repolarization	1/263	7/16374	0.107178	0.289061	0.237593	CACNA1D	1
GO:1900122	positive regulation of receptor binding	1/263	7/16374	0.107178	0.289061	0.237593	BDNF	1
GO:1900242	regulation of synaptic vesicle endocytosis	1/263	7/16374	0.107178	0.289061	0.237593	BTBD9	1
GO:1902961	positive regulation of aspartic-type endopeptidase activity involved in amyloid precursor protein catabolic process	1/263	7/16374	0.107178	0.289061	0.237593	EPHA4	1
GO:0007520	myoblast fusion	2/263	35/16374	0.108301	0.290149	0.238488	ADGRB3/KCNH1	2
GO:0035051	cardiocyte differentiation	2/263	35/16374	0.108301	0.290149	0.238488	SLC8A1/ACVR1	2
GO:0048488	synaptic vesicle endocytosis	2/263	35/16374	0.108301	0.290149	0.238488	BTBD9/SH3GL2	2
GO:0072583	clathrin-dependent endocytosis	2/263	35/16374	0.108301	0.290149	0.238488	SH3GL2/SNAP91	2
GO:0043547	positive regulation of GTPase activity	8/263	298/16374	0.108384	0.290149	0.238488	ADGRB3/RGS7/KALRN/RAP1GAP2/RASAL2/STXBP5L/SIPA1L3/ARHGAP44	8
GO:0001935	endothelial cell proliferation	4/263	113/16374	0.108893	0.291079	0.239253	ALDH1A2/CDH13/BMPR2/SEMA5A	4
GO:0010634	positive regulation of epithelial cell migration	2/263	36/16374	0.113507	0.302518	0.248654	BMPR2/PRKCE	2
GO:1901216	positive regulation of neuron death	2/263	36/16374	0.113507	0.302518	0.248654	GRIN2B/PPP1R13B	2
GO:0006493	protein O-linked glycosylation	2/263	37/16374	0.118776	0.303728	0.249649	LARGE1/TET3	2
GO:0042063	gliogenesis	2/263	37/16374	0.118776	0.303728	0.249649	EPHA4/PTK2B	2
GO:0031109	microtubule polymerization or depolymerization	3/263	75/16374	0.119706	0.303728	0.249649	NIN/MAP2/FGF13	3
GO:1901137	carbohydrate derivative biosynthetic process	3/263	75/16374	0.119706	0.303728	0.249649	LARGE1/GALNT17/ST6GALNAC5	3
GO:0001553	luteinization	1/263	8/16374	0.121525	0.303728	0.249649	INHBA	1
GO:0003084	positive regulation of systemic arterial blood pressure	1/263	8/16374	0.121525	0.303728	0.249649	ADRA1A	1
GO:0007270	neuron-neuron synaptic transmission	1/263	8/16374	0.121525	0.303728	0.249649	DLGAP2	1
GO:0007506	gonadal mesoderm development	1/263	8/16374	0.121525	0.303728	0.249649	ZFPM2	1
GO:0009142	nucleoside triphosphate biosynthetic process	1/263	8/16374	0.121525	0.303728	0.249649	AK5	1
GO:0019896	axonal transport of mitochondrion	1/263	8/16374	0.121525	0.303728	0.249649	SYBU	1
GO:0021795	cerebral cortex cell migration	1/263	8/16374	0.121525	0.303728	0.249649	FGF13	1
GO:0030836	positive regulation of actin filament depolymerization	1/263	8/16374	0.121525	0.303728	0.249649	SEMA5A	1
GO:0032528	microvillus organization	1/263	8/16374	0.121525	0.303728	0.249649	ATP8B1	1
GO:0034454	microtubule anchoring at centrosome	1/263	8/16374	0.121525	0.303728	0.249649	NIN	1
GO:0034983	peptidyl-lysine deacetylation	1/263	8/16374	0.121525	0.303728	0.249649	HDAC9	1
GO:0035754	B cell chemotaxis	1/263	8/16374	0.121525	0.303728	0.249649	PTK2B	1
GO:0042058	regulation of epidermal growth factor receptor signaling pathway	1/263	8/16374	0.121525	0.303728	0.249649	CDH13	1
GO:0042541	hemoglobin biosynthetic process	1/263	8/16374	0.121525	0.303728	0.249649	INHBA	1
GO:0044387	negative regulation of protein kinase activity by regulation of protein phosphorylation	1/263	8/16374	0.121525	0.303728	0.249649	ADARB1	1
GO:0046324	regulation of glucose import	1/263	8/16374	0.121525	0.303728	0.249649	PRKAG2	1
GO:0046710	GDP metabolic process	1/263	8/16374	0.121525	0.303728	0.249649	DLG2	1
GO:0046784	viral mRNA export from host cell nucleus	1/263	8/16374	0.121525	0.303728	0.249649	THOC3	1
GO:0051208	sequestering of calcium ion	1/263	8/16374	0.121525	0.303728	0.249649	RYR2	1
GO:0060073	micturition	1/263	8/16374	0.121525	0.303728	0.249649	ADRA1A	1
GO:0060075	regulation of resting membrane potential	1/263	8/16374	0.121525	0.303728	0.249649	KCNK1	1
GO:0060137	maternal process involved in parturition	1/263	8/16374	0.121525	0.303728	0.249649	KALRN	1
GO:0060415	muscle tissue morphogenesis	1/263	8/16374	0.121525	0.303728	0.249649	ADARB1	1
GO:0060452	positive regulation of cardiac muscle contraction	1/263	8/16374	0.121525	0.303728	0.249649	ADRA1A	1
GO:0061626	pharyngeal arch artery morphogenesis	1/263	8/16374	0.121525	0.303728	0.249649	BMPR2	1
GO:0070863	positive regulation of protein exit from endoplasmic reticulum	1/263	8/16374	0.121525	0.303728	0.249649	SORL1	1
GO:0071880	adenylate cyclase-activating adrenergic receptor signaling pathway	1/263	8/16374	0.121525	0.303728	0.249649	ADCY9	1
GO:0090279	regulation of calcium ion import	1/263	8/16374	0.121525	0.303728	0.249649	HOMER1	1
GO:0097105	presynaptic membrane assembly	1/263	8/16374	0.121525	0.303728	0.249649	NLGN4X	1
GO:0097113	AMPA glutamate receptor clustering	1/263	8/16374	0.121525	0.303728	0.249649	SHISA6	1
GO:0098883	synapse pruning	1/263	8/16374	0.121525	0.303728	0.249649	EPHA4	1
GO:0098887	neurotransmitter receptor transport, endosome to postsynaptic membrane	1/263	8/16374	0.121525	0.303728	0.249649	ARHGAP44	1
GO:0098909	regulation of cardiac muscle cell action potential involved in regulation of contraction	1/263	8/16374	0.121525	0.303728	0.249649	FGF13	1
GO:0099641	anterograde axonal protein transport	1/263	8/16374	0.121525	0.303728	0.249649	DLG2	1
GO:1901017	negative regulation of potassium ion transmembrane transporter activity	1/263	8/16374	0.121525	0.303728	0.249649	NEDD4L	1
GO:1902260	negative regulation of delayed rectifier potassium channel activity	1/263	8/16374	0.121525	0.303728	0.249649	ANK3	1
GO:1902966	positive regulation of protein localization to early endosome	1/263	8/16374	0.121525	0.303728	0.249649	SORL1	1
GO:1903115	regulation of actin filament-based movement	1/263	8/16374	0.121525	0.303728	0.249649	FGF13	1
GO:2000020	positive regulation of male gonad development	1/263	8/16374	0.121525	0.303728	0.249649	ZFPM2	1
GO:2000096	positive regulation of Wnt signaling pathway, planar cell polarity pathway	1/263	8/16374	0.121525	0.303728	0.249649	MLLT3	1
GO:2001259	positive regulation of cation channel activity	1/263	8/16374	0.121525	0.303728	0.249649	ANK3	1
GO:0009749	response to glucose	3/263	76/16374	0.12323	0.307565	0.252803	SLC8A1/PTPRN2/PTK2B	3
GO:0007223	Wnt signaling pathway, calcium modulating pathway	2/263	38/16374	0.124105	0.308471	0.253547	PPP3CA/CAMK2A	2
GO:0033173	calcineurin-NFAT signaling cascade	2/263	38/16374	0.124105	0.308471	0.253547	PPP3CA/LMCD1	2
GO:0099173	postsynapse organization	2/263	38/16374	0.124105	0.308471	0.253547	CNKSR2/DGKB	2
GO:0070727	cellular macromolecule localization	5/263	164/16374	0.124851	0.309899	0.254721	MAP2/NSF/RIMS2/AP3B2/RIMS1	5
GO:0009968	negative regulation of signal transduction	2/263	39/16374	0.129491	0.313834	0.257956	RGS7/ACVR1	2
GO:0051261	protein depolymerization	2/263	39/16374	0.129491	0.313834	0.257956	FGF13/SEMA5A	2
GO:0051656	establishment of organelle localization	2/263	39/16374	0.129491	0.313834	0.257956	MAP2/STXBP1	2
GO:0061098	positive regulation of protein tyrosine kinase activity	2/263	39/16374	0.129491	0.313834	0.257956	EPHA4/GRM5	2
GO:0007204	positive regulation of cytosolic calcium ion concentration	4/263	121/16374	0.130623	0.313834	0.257956	CACNA1A/ADRA1A/CACNA1C/PTK2B	4
GO:0051402	neuron apoptotic process	6/263	214/16374	0.131238	0.313834	0.257956	GRIK5/SCN2A/GABRB3/STXBP1/PAK3/PTK2B	6
GO:0030308	negative regulation of cell growth	4/263	122/16374	0.133458	0.313834	0.257956	INHBA/BMPR2/MEG3/SLIT3	4
GO:0008217	regulation of blood pressure	3/263	79/16374	0.134025	0.313834	0.257956	BMPR2/ADRA1A/CACNA1B	3
GO:0014855	striated muscle cell proliferation	2/263	40/16374	0.13493	0.313834	0.257956	JARID2/ZFPM2	2
GO:0070098	chemokine-mediated signaling pathway	2/263	40/16374	0.13493	0.313834	0.257956	SLIT3/PTK2B	2
GO:0019538	protein metabolic process	6/263	216/16374	0.135403	0.313834	0.257956	SORL1/CYFIP2/INHBA/NEDD4L/NSF/GRIN2A	6
GO:0002281	macrophage activation involved in immune response	1/263	9/16374	0.135642	0.313834	0.257956	PRKCE	1
GO:0002315	marginal zone B cell differentiation	1/263	9/16374	0.135642	0.313834	0.257956	PTK2B	1
GO:0003085	negative regulation of systemic arterial blood pressure	1/263	9/16374	0.135642	0.313834	0.257956	BMPR2	1
GO:0003254	regulation of membrane depolarization	1/263	9/16374	0.135642	0.313834	0.257956	NEDD4L	1
GO:0003299	muscle hypertrophy in response to stress	1/263	9/16374	0.135642	0.313834	0.257956	PPP3CA	1
GO:0006044	N-acetylglucosamine metabolic process	1/263	9/16374	0.135642	0.313834	0.257956	LARGE1	1
GO:0006171	cAMP biosynthetic process	1/263	9/16374	0.135642	0.313834	0.257956	ADCY9	1
GO:0008090	retrograde axonal transport	1/263	9/16374	0.135642	0.313834	0.257956	TMEM108	1
GO:0010226	response to lithium ion	1/263	9/16374	0.135642	0.313834	0.257956	PTK2B	1
GO:0014887	cardiac muscle adaptation	1/263	9/16374	0.135642	0.313834	0.257956	PPP3CA	1
GO:0016051	carbohydrate biosynthetic process	1/263	9/16374	0.135642	0.313834	0.257956	CHST11	1
GO:0021612	facial nerve structural organization	1/263	9/16374	0.135642	0.313834	0.257956	PLXNA4	1
GO:0031000	response to caffeine	1/263	9/16374	0.135642	0.313834	0.257956	RYR2	1
GO:0032926	negative regulation of activin receptor signaling pathway	1/263	9/16374	0.135642	0.313834	0.257956	ACVR1	1
GO:0035562	negative regulation of chromatin binding	1/263	9/16374	0.135642	0.313834	0.257956	PPP3CA	1
GO:0038166	angiotensin-activated signaling pathway	1/263	9/16374	0.135642	0.313834	0.257956	CAMK2A	1
GO:0042748	circadian sleep/wake cycle, non-REM sleep	1/263	9/16374	0.135642	0.313834	0.257956	BTBD9	1
GO:0043031	negative regulation of macrophage activation	1/263	9/16374	0.135642	0.313834	0.257956	LRFN5	1
GO:0043267	negative regulation of potassium ion transport	1/263	9/16374	0.135642	0.313834	0.257956	PTK2B	1
GO:0043306	positive regulation of mast cell degranulation	1/263	9/16374	0.135642	0.313834	0.257956	STXBP1	1
GO:0043501	skeletal muscle adaptation	1/263	9/16374	0.135642	0.313834	0.257956	CAMK2B	1
GO:0048149	behavioral response to ethanol	1/263	9/16374	0.135642	0.313834	0.257956	UNC79	1
GO:0048263	determination of dorsal identity	1/263	9/16374	0.135642	0.313834	0.257956	ACVR1	1
GO:0048703	embryonic viscerocranium morphogenesis	1/263	9/16374	0.135642	0.313834	0.257956	CHST11	1
GO:0048712	negative regulation of astrocyte differentiation	1/263	9/16374	0.135642	0.313834	0.257956	DAB1	1
GO:0050774	negative regulation of dendrite morphogenesis	1/263	9/16374	0.135642	0.313834	0.257956	PPP3CA	1
GO:0051668	localization within membrane	1/263	9/16374	0.135642	0.313834	0.257956	CDH13	1
GO:0060419	heart growth	1/263	9/16374	0.135642	0.313834	0.257956	BASP1	1
GO:0060539	diaphragm development	1/263	9/16374	0.135642	0.313834	0.257956	BASP1	1
GO:0060586	multicellular organismal iron ion homeostasis	1/263	9/16374	0.135642	0.313834	0.257956	BTBD9	1
GO:0070933	histone H4 deacetylation	1/263	9/16374	0.135642	0.313834	0.257956	HDAC9	1
GO:0090129	positive regulation of synapse maturation	1/263	9/16374	0.135642	0.313834	0.257956	CAMK2B	1
GO:0097530	granulocyte migration	1/263	9/16374	0.135642	0.313834	0.257956	CAMK1D	1
GO:0098696	regulation of neurotransmitter receptor localization to postsynaptic specialization membrane	1/263	9/16374	0.135642	0.313834	0.257956	IQSEC2	1
GO:0098974	postsynaptic actin cytoskeleton organization	1/263	9/16374	0.135642	0.313834	0.257956	FRMPD4	1
GO:0099010	modification of postsynaptic structure	1/263	9/16374	0.135642	0.313834	0.257956	TIAM1	1
GO:0099633	protein localization to postsynaptic specialization membrane	1/263	9/16374	0.135642	0.313834	0.257956	IQSEC2	1
GO:0140029	exocytic process	1/263	9/16374	0.135642	0.313834	0.257956	STXBP1	1
GO:1902946	protein localization to early endosome	1/263	9/16374	0.135642	0.313834	0.257956	SORL1	1
GO:1903799	negative regulation of production of miRNAs involved in gene silencing by miRNA	1/263	9/16374	0.135642	0.313834	0.257956	PPP3CA	1
GO:1903818	positive regulation of voltage-gated potassium channel activity	1/263	9/16374	0.135642	0.313834	0.257956	KCNC2	1
GO:2001056	positive regulation of cysteine-type endopeptidase activity	1/263	9/16374	0.135642	0.313834	0.257956	GRIN2B	1
GO:0048609	multicellular organismal reproductive process	3/263	81/16374	0.141398	0.326638	0.26848	INHBA/ACVR1/CELF4	3
GO:0008380	RNA splicing	5/263	171/16374	0.141537	0.326638	0.26848	SNRPN/RBFOX2/RBFOX1/THOC3/RBFOX3	5
GO:0009101	glycoprotein biosynthetic process	3/263	82/16374	0.145135	0.328717	0.270189	LARGE1/GALNT17/ST6GALNAC5	3
GO:0022414	reproductive process	2/263	42/16374	0.145956	0.328717	0.270189	STXBP1/RIMS1	2
GO:0034332	adherens junction organization	2/263	42/16374	0.145956	0.328717	0.270189	CDH13/CDH8	2
GO:0071773	cellular response to BMP stimulus	3/263	83/16374	0.148903	0.328717	0.270189	BMPR2/RYR2/ACVR1	3
GO:0007016	obsolete cytoskeletal anchoring at plasma membrane	1/263	10/16374	0.149533	0.328717	0.270189	ANK3	1
GO:0009435	NAD biosynthetic process	1/263	10/16374	0.149533	0.328717	0.270189	NMNAT2	1
GO:0010998	regulation of translational initiation by eIF2 alpha phosphorylation	1/263	10/16374	0.149533	0.328717	0.270189	NCK2	1
GO:0021587	cerebellum morphogenesis	1/263	10/16374	0.149533	0.328717	0.270189	DAB1	1
GO:0030431	sleep	1/263	10/16374	0.149533	0.328717	0.270189	GRIN2A	1
GO:0031113	regulation of microtubule polymerization	1/263	10/16374	0.149533	0.328717	0.270189	MAP2	1
GO:0031915	positive regulation of synaptic plasticity	1/263	10/16374	0.149533	0.328717	0.270189	UNC13A	1
GO:0035865	cellular response to potassium ion	1/263	10/16374	0.149533	0.328717	0.270189	DLG2	1
GO:0036376	sodium ion export across plasma membrane	1/263	10/16374	0.149533	0.328717	0.270189	SLC8A1	1
GO:0042304	regulation of fatty acid biosynthetic process	1/263	10/16374	0.149533	0.328717	0.270189	PRKAG2	1
GO:0042670	retinal cone cell differentiation	1/263	10/16374	0.149533	0.328717	0.270189	HCN1	1
GO:0043114	regulation of vascular permeability	1/263	10/16374	0.149533	0.328717	0.270189	HRH1	1
GO:0046037	GMP metabolic process	1/263	10/16374	0.149533	0.328717	0.270189	DLG2	1
GO:0046549	retinal cone cell development	1/263	10/16374	0.149533	0.328717	0.270189	HCN1	1
GO:0048245	eosinophil chemotaxis	1/263	10/16374	0.149533	0.328717	0.270189	HRH1	1
GO:0048660	regulation of smooth muscle cell proliferation	1/263	10/16374	0.149533	0.328717	0.270189	PDE1A	1
GO:0051651	maintenance of location in cell	1/263	10/16374	0.149533	0.328717	0.270189	RYR2	1
GO:0060009	Sertoli cell development	1/263	10/16374	0.149533	0.328717	0.270189	FNDC3A	1
GO:0060306	regulation of membrane repolarization	1/263	10/16374	0.149533	0.328717	0.270189	NEDD4L	1
GO:0071331	cellular response to hexose stimulus	1/263	10/16374	0.149533	0.328717	0.270189	PTPRN2	1
GO:0071705	nitrogen compound transport	1/263	10/16374	0.149533	0.328717	0.270189	PRKCE	1
GO:0071709	membrane assembly	1/263	10/16374	0.149533	0.328717	0.270189	ANK3	1
GO:0072384	organelle transport along microtubule	1/263	10/16374	0.149533	0.328717	0.270189	MAP2	1
GO:0086010	membrane depolarization during action potential	1/263	10/16374	0.149533	0.328717	0.270189	ANK3	1
GO:0090037	positive regulation of protein kinase C signaling	1/263	10/16374	0.149533	0.328717	0.270189	ADRA1A	1
GO:0097050	type B pancreatic cell apoptotic process	1/263	10/16374	0.149533	0.328717	0.270189	RYR2	1
GO:0097237	cellular response to toxic substance	1/263	10/16374	0.149533	0.328717	0.270189	KCNC2	1
GO:0097305	response to alcohol	1/263	10/16374	0.149533	0.328717	0.270189	UNC79	1
GO:0099509	regulation of presynaptic cytosolic calcium ion concentration	1/263	10/16374	0.149533	0.328717	0.270189	ATP2B2	1
GO:1901264	carbohydrate derivative transport	1/263	10/16374	0.149533	0.328717	0.270189	PRKCE	1
GO:1901380	negative regulation of potassium ion transmembrane transport	1/263	10/16374	0.149533	0.328717	0.270189	NEDD4L	1
GO:1902237	positive regulation of endoplasmic reticulum stress-induced intrinsic apoptotic signaling pathway	1/263	10/16374	0.149533	0.328717	0.270189	NCK2	1
GO:1904894	positive regulation of receptor signaling pathway via STAT	1/263	10/16374	0.149533	0.328717	0.270189	PTK2B	1
GO:2000273	positive regulation of signaling receptor activity	1/263	10/16374	0.149533	0.328717	0.270189	PRKCE	1
GO:2001028	positive regulation of endothelial cell chemotaxis	1/263	10/16374	0.149533	0.328717	0.270189	SEMA5A	1
GO:0048870	cell motility	10/263	427/16374	0.150973	0.331097	0.272145	PHACTR1/ADARB1/PPP3CA/CDH13/TIAM1/LAMB1/MCTP1/ACVR1/CEMIP/PTK2B	10
GO:0050794	regulation of cellular process	4/263	128/16374	0.150982	0.331097	0.272145	RGS7/HOMER1/CNKSR2/ACVR1	4
GO:0018210	peptidyl-threonine modification	2/263	43/16374	0.151537	0.331511	0.272485	PRKAG2/CEMIP	2
GO:0048016	inositol phosphate-mediated signaling	2/263	43/16374	0.151537	0.331511	0.272485	HRH1/LMCD1	2
GO:0097435	supramolecular fiber organization	4/263	129/16374	0.153985	0.336458	0.276551	NIN/MAP2/FGF13/FHOD3	4
GO:0090150	establishment of protein localization to membrane	2/263	44/16374	0.15716	0.342981	0.281913	ANK3/CEMIP	2
GO:0000082	G1/S transition of mitotic cell cycle	5/263	178/16374	0.159137	0.345322	0.283837	PPP3CA/INHBA/DHFR/ACVR1/CAMK2A	5
GO:0009100	glycoprotein metabolic process	3/263	86/16374	0.160395	0.345322	0.283837	LARGE1/GALNT17/ST6GALNAC5	3
GO:0003208	cardiac ventricle morphogenesis	2/263	45/16374	0.162821	0.345322	0.283837	RYR2/ZFPM2	2
GO:0014032	neural crest cell development	2/263	45/16374	0.162821	0.345322	0.283837	ALDH1A2/ACVR1	2
GO:0006853	carnitine shuttle	1/263	11/16374	0.163201	0.345322	0.283837	PRKAG2	1
GO:0014075	response to amine	1/263	11/16374	0.163201	0.345322	0.283837	KCNC2	1
GO:0015800	acidic amino acid transport	1/263	11/16374	0.163201	0.345322	0.283837	GRM7	1
GO:0018119	peptidyl-cysteine S-nitrosylation	1/263	11/16374	0.163201	0.345322	0.283837	DMD	1
GO:0021602	cranial nerve morphogenesis	1/263	11/16374	0.163201	0.345322	0.283837	PLXNA4	1
GO:0030278	regulation of ossification	1/263	11/16374	0.163201	0.345322	0.283837	ACVR1	1
GO:0042711	maternal behavior	1/263	11/16374	0.163201	0.345322	0.283837	KALRN	1
GO:0043097	pyrimidine nucleoside salvage	1/263	11/16374	0.163201	0.345322	0.283837	UPP2	1
GO:0045176	apical protein localization	1/263	11/16374	0.163201	0.345322	0.283837	HCN1	1
GO:0045956	positive regulation of calcium ion-dependent exocytosis	1/263	11/16374	0.163201	0.345322	0.283837	STXBP1	1
GO:0046135	pyrimidine nucleoside catabolic process	1/263	11/16374	0.163201	0.345322	0.283837	UPP2	1
GO:0050802	circadian sleep/wake cycle, sleep	1/263	11/16374	0.163201	0.345322	0.283837	BTBD9	1
GO:0051775	response to redox state	1/263	11/16374	0.163201	0.345322	0.283837	RYR2	1
GO:0070254	mucus secretion	1/263	11/16374	0.163201	0.345322	0.283837	PRKCE	1
GO:0071372	cellular response to follicle-stimulating hormone stimulus	1/263	11/16374	0.163201	0.345322	0.283837	INHBA	1
GO:0072584	caveolin-mediated endocytosis	1/263	11/16374	0.163201	0.345322	0.283837	NEDD4L	1
GO:0086013	membrane repolarization during cardiac muscle cell action potential	1/263	11/16374	0.163201	0.345322	0.283837	KCND3	1
GO:0097205	renal filtration	1/263	11/16374	0.163201	0.345322	0.283837	PTPRO	1
GO:1902004	positive regulation of amyloid-beta formation	1/263	11/16374	0.163201	0.345322	0.283837	EPHA4	1
GO:1903358	regulation of Golgi organization	1/263	11/16374	0.163201	0.345322	0.283837	PDE4DIP	1
GO:1990089	response to nerve growth factor	1/263	11/16374	0.163201	0.345322	0.283837	KCNC2	1
GO:2001241	positive regulation of extrinsic apoptotic signaling pathway in absence of ligand	1/263	11/16374	0.163201	0.345322	0.283837	INHBA	1
GO:0048010	vascular endothelial growth factor receptor signaling pathway	3/263	88/16374	0.168202	0.354911	0.291719	CYFIP2/NCK2/PTK2B	3
GO:0006024	glycosaminoglycan biosynthetic process	2/263	46/16374	0.168519	0.354911	0.291719	HS3ST2/HS6ST2	2
GO:0019932	second-messenger-mediated signaling	2/263	46/16374	0.168519	0.354911	0.291719	CDH13/PTK2B	2
GO:0034260	negative regulation of GTPase activity	2/263	46/16374	0.168519	0.354911	0.291719	PTPRN2/DGKI	2
GO:0009653	anatomical structure morphogenesis	7/263	282/16374	0.169518	0.355466	0.292175	MEGF11/BMPR2/DSCAM/SDK1/ZFPM2/ATP8A2/DAB1	7
GO:0008285	negative regulation of cell population proliferation	9/263	388/16374	0.173642	0.355466	0.292175	ADARB1/ALDH1A2/CDH13/INHBA/ADRA1A/NCK2/ATP8A2/SLIT3/PTK2B	9
GO:0030166	proteoglycan biosynthetic process	2/263	47/16374	0.17425	0.355466	0.292175	BMPR2/CHST11	2
GO:0032515	negative regulation of phosphoprotein phosphatase activity	2/263	47/16374	0.17425	0.355466	0.292175	PHACTR1/PHACTR2	2
GO:0048708	astrocyte differentiation	2/263	47/16374	0.17425	0.355466	0.292175	EPHA4/DAB1	2
GO:0000423	mitophagy	1/263	12/16374	0.176651	0.355466	0.292175	VPS13D	1
GO:0002002	regulation of angiotensin levels in blood	1/263	12/16374	0.176651	0.355466	0.292175	C9orf3	1
GO:0002003	angiotensin maturation	1/263	12/16374	0.176651	0.355466	0.292175	C9orf3	1
GO:0008595	anterior/posterior axis specification, embryo	1/263	12/16374	0.176651	0.355466	0.292175	BASP1	1
GO:0009116	nucleoside metabolic process	1/263	12/16374	0.176651	0.355466	0.292175	UPP2	1
GO:0009312	oligosaccharide biosynthetic process	1/263	12/16374	0.176651	0.355466	0.292175	ST6GALNAC5	1
GO:0010447	response to acidic pH	1/263	12/16374	0.176651	0.355466	0.292175	ASIC2	1
GO:0010457	centriole-centriole cohesion	1/263	12/16374	0.176651	0.355466	0.292175	NIN	1
GO:0014904	myotube cell development	1/263	12/16374	0.176651	0.355466	0.292175	HDAC9	1
GO:0021794	thalamus development	1/263	12/16374	0.176651	0.355466	0.292175	CNTNAP2	1
GO:0030833	regulation of actin filament polymerization	1/263	12/16374	0.176651	0.355466	0.292175	PAK3	1
GO:0031115	negative regulation of microtubule polymerization	1/263	12/16374	0.176651	0.355466	0.292175	MAP2	1
GO:0032026	response to magnesium ion	1/263	12/16374	0.176651	0.355466	0.292175	KCNC2	1
GO:0032274	gonadotropin secretion	1/263	12/16374	0.176651	0.355466	0.292175	INHBA	1
GO:0038110	interleukin-2-mediated signaling pathway	1/263	12/16374	0.176651	0.355466	0.292175	PTK2B	1
GO:0048333	mesodermal cell differentiation	1/263	12/16374	0.176651	0.355466	0.292175	INHBA	1
GO:0048644	muscle organ morphogenesis	1/263	12/16374	0.176651	0.355466	0.292175	ADARB1	1
GO:0050848	regulation of calcium-mediated signaling	1/263	12/16374	0.176651	0.355466	0.292175	PTK2B	1
GO:0050927	positive regulation of positive chemotaxis	1/263	12/16374	0.176651	0.355466	0.292175	CDH13	1
GO:0051481	negative regulation of cytosolic calcium ion concentration	1/263	12/16374	0.176651	0.355466	0.292175	SLC8A1	1
GO:0051642	centrosome localization	1/263	12/16374	0.176651	0.355466	0.292175	NIN	1
GO:0060081	membrane hyperpolarization	1/263	12/16374	0.176651	0.355466	0.292175	KCNQ3	1
GO:0060841	venous blood vessel development	1/263	12/16374	0.176651	0.355466	0.292175	BMPR2	1
GO:0070669	response to interleukin-2	1/263	12/16374	0.176651	0.355466	0.292175	PTK2B	1
GO:0071257	cellular response to electrical stimulus	1/263	12/16374	0.176651	0.355466	0.292175	GRM1	1
GO:0071352	cellular response to interleukin-2	1/263	12/16374	0.176651	0.355466	0.292175	PTK2B	1
GO:0071498	cellular response to fluid shear stress	1/263	12/16374	0.176651	0.355466	0.292175	PTK2B	1
GO:0098885	modification of postsynaptic actin cytoskeleton	1/263	12/16374	0.176651	0.355466	0.292175	TIAM1	1
GO:0098915	membrane repolarization during ventricular cardiac muscle cell action potential	1/263	12/16374	0.176651	0.355466	0.292175	KCND3	1
GO:0099590	neurotransmitter receptor internalization	1/263	12/16374	0.176651	0.355466	0.292175	SNAP25	1
GO:1900272	negative regulation of long-term synaptic potentiation	1/263	12/16374	0.176651	0.355466	0.292175	EPHA4	1
GO:1904862	inhibitory synapse assembly	1/263	12/16374	0.176651	0.355466	0.292175	GABRB3	1
GO:1990776	response to angiotensin	1/263	12/16374	0.176651	0.355466	0.292175	CAMK2A	1
GO:2000009	negative regulation of protein localization to cell surface	1/263	12/16374	0.176651	0.355466	0.292175	NEDD4L	1
GO:2001256	regulation of store-operated calcium entry	1/263	12/16374	0.176651	0.355466	0.292175	HOMER1	1
GO:0030097	hemopoiesis	4/263	137/16374	0.178784	0.359359	0.295375	INHBA/KIRREL3/SIPA1L3/KCNAB2	4
GO:0018107	peptidyl-threonine phosphorylation	3/263	91/16374	0.180113	0.361626	0.297239	PRKAG2/ACVR1/CEMIP	3
GO:0043149	stress fiber assembly	3/263	92/16374	0.184133	0.368553	0.302932	PHACTR1/PPM1E/PTK2B	3
GO:0022037	metencephalon development	2/263	49/16374	0.185803	0.368553	0.302932	NLGN4X/CNTN1	2
GO:0048678	response to axon injury	2/263	49/16374	0.185803	0.368553	0.302932	EPHA4/RTN4RL1	2
GO:0055007	cardiac muscle cell differentiation	2/263	49/16374	0.185803	0.368553	0.302932	SLC8A1/ACVR1	2
GO:0006486	protein glycosylation	3/263	93/16374	0.188178	0.368553	0.302932	LARGE1/GALNT17/ST6GALNAC5	3
GO:0048534	hematopoietic or lymphoid organ development	3/263	93/16374	0.188178	0.368553	0.302932	INHBA/SIPA1L3/KCNAB2	3
GO:0001945	lymph vessel development	1/263	13/16374	0.189885	0.368553	0.302932	BMPR2	1
GO:0006376	mRNA splice site selection	1/263	13/16374	0.189885	0.368553	0.302932	CELF2	1
GO:0010038	response to metal ion	1/263	13/16374	0.189885	0.368553	0.302932	NEDD4L	1
GO:0010614	negative regulation of cardiac muscle hypertrophy	1/263	13/16374	0.189885	0.368553	0.302932	JARID2	1
GO:0010666	positive regulation of cardiac muscle cell apoptotic process	1/263	13/16374	0.189885	0.368553	0.302932	CAMK2A	1
GO:0014829	vascular smooth muscle contraction	1/263	13/16374	0.189885	0.368553	0.302932	SLC8A1	1
GO:0016024	CDP-diacylglycerol biosynthetic process	1/263	13/16374	0.189885	0.368553	0.302932	LCLAT1	1
GO:0022030	telencephalon glial cell migration	1/263	13/16374	0.189885	0.368553	0.302932	LAMB1	1
GO:0030728	ovulation	1/263	13/16374	0.189885	0.368553	0.302932	INHBA	1
GO:0030837	negative regulation of actin filament polymerization	1/263	13/16374	0.189885	0.368553	0.302932	FHOD3	1
GO:0042574	retinal metabolic process	1/263	13/16374	0.189885	0.368553	0.302932	ALDH1A2	1
GO:0045778	positive regulation of ossification	1/263	13/16374	0.189885	0.368553	0.302932	BMPR2	1
GO:0046426	negative regulation of receptor signaling pathway via JAK-STAT	1/263	13/16374	0.189885	0.368553	0.302932	DAB1	1
GO:0046889	positive regulation of lipid biosynthetic process	1/263	13/16374	0.189885	0.368553	0.302932	CCDC3	1
GO:0046940	nucleoside monophosphate phosphorylation	1/263	13/16374	0.189885	0.368553	0.302932	AK5	1
GO:0050710	negative regulation of cytokine secretion	1/263	13/16374	0.189885	0.368553	0.302932	HDAC9	1
GO:0060044	negative regulation of cardiac muscle cell proliferation	1/263	13/16374	0.189885	0.368553	0.302932	JARID2	1
GO:0060219	camera-type eye photoreceptor cell differentiation	1/263	13/16374	0.189885	0.368553	0.302932	DSCAM	1
GO:0060413	atrial septum morphogenesis	1/263	13/16374	0.189885	0.368553	0.302932	BMPR2	1
GO:0061029	eyelid development in camera-type eye	1/263	13/16374	0.189885	0.368553	0.302932	INHBA	1
GO:0061298	retina vasculature development in camera-type eye	1/263	13/16374	0.189885	0.368553	0.302932	BMPR2	1
GO:0061577	calcium ion transmembrane transport via high voltage-gated calcium channel	1/263	13/16374	0.189885	0.368553	0.302932	CACNA1C	1
GO:0071872	cellular response to epinephrine stimulus	1/263	13/16374	0.189885	0.368553	0.302932	RYR2	1
GO:0090175	regulation of establishment of planar polarity	1/263	13/16374	0.189885	0.368553	0.302932	MLLT3	1
GO:2000279	negative regulation of DNA biosynthetic process	1/263	13/16374	0.189885	0.368553	0.302932	BMPR2	1
GO:0021510	spinal cord development	2/263	50/16374	0.19162	0.369932	0.304066	ADARB1/DAB1	2
GO:0034968	histone lysine methylation	2/263	50/16374	0.19162	0.369932	0.304066	AUTS2/JARID2	2
GO:0043525	positive regulation of neuron apoptotic process	2/263	50/16374	0.19162	0.369932	0.304066	GRIK5/PAK3	2
GO:0051604	protein maturation	2/263	50/16374	0.19162	0.369932	0.304066	SORL1/SPON1	2
GO:0060038	cardiac muscle cell proliferation	2/263	50/16374	0.19162	0.369932	0.304066	JARID2/ZFPM2	2
GO:0010628	positive regulation of gene expression	8/263	346/16374	0.194221	0.374555	0.307865	CNTN1/ALDH1A2/INHBA/ZNF804A/ANK3/RIMS2/FTX/RIMS1	8
GO:0007173	epidermal growth factor receptor signaling pathway	3/263	95/16374	0.196334	0.377421	0.310221	CDH13/NCK2/SH3GL2	3
GO:0030218	erythrocyte differentiation	3/263	95/16374	0.196334	0.377421	0.310221	RBFOX2/TMOD3/INHBA	3
GO:0032355	response to estradiol	3/263	95/16374	0.196334	0.377421	0.310221	ARNT2/ALDH1A2/STXBP1	3
GO:0010595	positive regulation of endothelial cell migration	2/263	51/16374	0.19746	0.378378	0.311008	BMPR2/PTK2B	2
GO:0042542	response to hydrogen peroxide	2/263	51/16374	0.19746	0.378378	0.311008	SLC8A1/PTK2B	2
GO:0050885	neuromuscular process controlling balance	2/263	51/16374	0.19746	0.378378	0.311008	RBFOX2/TNR	2
GO:0030168	platelet activation	4/263	143/16374	0.198205	0.379404	0.311851	PRKCE/DGKB/DGKI/STXBP1	4
GO:0001771	immunological synapse formation	1/263	14/16374	0.202908	0.379549	0.31197	NCK2	1
GO:0001921	positive regulation of receptor recycling	1/263	14/16374	0.202908	0.379549	0.31197	NSF	1
GO:0003214	cardiac left ventricle morphogenesis	1/263	14/16374	0.202908	0.379549	0.31197	RYR2	1
GO:0006835	dicarboxylic acid transport	1/263	14/16374	0.202908	0.379549	0.31197	GRM7	1
GO:0006950	response to stress	1/263	14/16374	0.202908	0.379549	0.31197	MCTP1	1
GO:0009855	determination of bilateral symmetry	1/263	14/16374	0.202908	0.379549	0.31197	ALDH1A2	1
GO:0010954	positive regulation of protein processing	1/263	14/16374	0.202908	0.379549	0.31197	SPON1	1
GO:0021545	cranial nerve development	1/263	14/16374	0.202908	0.379549	0.31197	PLXNA4	1
GO:0021680	cerebellar Purkinje cell layer development	1/263	14/16374	0.202908	0.379549	0.31197	SEZ6L	1
GO:0021801	cerebral cortex radial glia guided migration	1/263	14/16374	0.202908	0.379549	0.31197	LAMB1	1
GO:0022408	negative regulation of cell-cell adhesion	1/263	14/16374	0.202908	0.379549	0.31197	TNR	1
GO:0030213	hyaluronan biosynthetic process	1/263	14/16374	0.202908	0.379549	0.31197	CEMIP	1
GO:0032228	regulation of synaptic transmission, GABAergic	1/263	14/16374	0.202908	0.379549	0.31197	SYN3	1
GO:0036303	lymph vessel morphogenesis	1/263	14/16374	0.202908	0.379549	0.31197	BMPR2	1
GO:0042573	retinoic acid metabolic process	1/263	14/16374	0.202908	0.379549	0.31197	ALDH1A2	1
GO:0042976	activation of Janus kinase activity	1/263	14/16374	0.202908	0.379549	0.31197	PTK2B	1
GO:0045806	negative regulation of endocytosis	1/263	14/16374	0.202908	0.379549	0.31197	MCTP1	1
GO:0055003	cardiac myofibril assembly	1/263	14/16374	0.202908	0.379549	0.31197	FHOD3	1
GO:0071361	cellular response to ethanol	1/263	14/16374	0.202908	0.379549	0.31197	PRKCE	1
GO:0072075	metanephric mesenchyme development	1/263	14/16374	0.202908	0.379549	0.31197	BASP1	1
GO:0072189	ureter development	1/263	14/16374	0.202908	0.379549	0.31197	ALDH1A2	1
GO:2000311	regulation of AMPA receptor activity	1/263	14/16374	0.202908	0.379549	0.31197	CACNG8	1
GO:0042476	odontogenesis	2/263	52/16374	0.203322	0.379549	0.31197	INHBA/LAMB1	2
GO:0071320	cellular response to cAMP	2/263	52/16374	0.203322	0.379549	0.31197	SLC8A1/HCN1	2
GO:0060541	respiratory system development	3/263	97/16374	0.204576	0.381494	0.313569	ALDH1A2/BASP1/ZFPM2	3
GO:0007568	aging	5/263	197/16374	0.210923	0.388643	0.319445	PPP3CA/COL4A2/ADRA1A/GRM5/ATP8A2	5
GO:0043542	endothelial cell migration	4/263	147/16374	0.211495	0.388643	0.319445	CDH13/BMPR2/SEMA5A/PTK2B	4
GO:0048562	embryonic organ morphogenesis	3/263	99/16374	0.212895	0.388643	0.319445	RYR2/ATP8A2/ACVR1	3
GO:0043087	regulation of GTPase activity	2/263	54/16374	0.215103	0.388643	0.319445	SIPA1L1/EPHA4	2
GO:0072577	endothelial cell apoptotic process	2/263	54/16374	0.215103	0.388643	0.319445	BMPR2/SEMA5A	2
GO:0001504	neurotransmitter uptake	1/263	15/16374	0.215722	0.388643	0.319445	SNAP25	1
GO:0001946	lymphangiogenesis	1/263	15/16374	0.215722	0.388643	0.319445	BMPR2	1
GO:0002028	regulation of sodium ion transport	1/263	15/16374	0.215722	0.388643	0.319445	SLC8A1	1
GO:0002115	store-operated calcium entry	1/263	15/16374	0.215722	0.388643	0.319445	HOMER1	1
GO:0007512	adult heart development	1/263	15/16374	0.215722	0.388643	0.319445	ADRA1A	1
GO:0010717	regulation of epithelial to mesenchymal transition	1/263	15/16374	0.215722	0.388643	0.319445	TIAM1	1
GO:0010832	negative regulation of myotube differentiation	1/263	15/16374	0.215722	0.388643	0.319445	BDNF	1
GO:0019674	NAD metabolic process	1/263	15/16374	0.215722	0.388643	0.319445	NMNAT2	1
GO:0021542	dentate gyrus development	1/263	15/16374	0.215722	0.388643	0.319445	TMEM108	1
GO:0030502	negative regulation of bone mineralization	1/263	15/16374	0.215722	0.388643	0.319445	PTK2B	1
GO:0030517	negative regulation of axon extension	1/263	15/16374	0.215722	0.388643	0.319445	MAP2	1
GO:0032787	monocarboxylic acid metabolic process	1/263	15/16374	0.215722	0.388643	0.319445	PRKAG2	1
GO:0033198	response to ATP	1/263	15/16374	0.215722	0.388643	0.319445	SLC8A1	1
GO:0034440	lipid oxidation	1/263	15/16374	0.215722	0.388643	0.319445	PRKAG2	1
GO:0045475	locomotor rhythm	1/263	15/16374	0.215722	0.388643	0.319445	KCND2	1
GO:0048026	positive regulation of mRNA splicing, via spliceosome	1/263	15/16374	0.215722	0.388643	0.319445	CELF4	1
GO:0048268	clathrin coat assembly	1/263	15/16374	0.215722	0.388643	0.319445	SNAP91	1
GO:0050658	RNA transport	1/263	15/16374	0.215722	0.388643	0.319445	RBFOX1	1
GO:0051571	positive regulation of histone H3-K4 methylation	1/263	15/16374	0.215722	0.388643	0.319445	AUTS2	1
GO:0052695	cellular glucuronidation	1/263	15/16374	0.215722	0.388643	0.319445	PRKCE	1
GO:0060231	mesenchymal to epithelial transition	1/263	15/16374	0.215722	0.388643	0.319445	BASP1	1
GO:0060314	regulation of ryanodine-sensitive calcium-release channel activity	1/263	15/16374	0.215722	0.388643	0.319445	DMD	1
GO:0070050	neuron cellular homeostasis	1/263	15/16374	0.215722	0.388643	0.319445	NELL2	1
GO:0070262	peptidyl-serine dephosphorylation	1/263	15/16374	0.215722	0.388643	0.319445	PPP3CA	1
GO:0071380	cellular response to prostaglandin E stimulus	1/263	15/16374	0.215722	0.388643	0.319445	PRKCE	1
GO:0080182	histone H3-K4 trimethylation	1/263	15/16374	0.215722	0.388643	0.319445	TET3	1
GO:1903827	regulation of cellular protein localization	1/263	15/16374	0.215722	0.388643	0.319445	MAP2	1
GO:1903830	magnesium ion transmembrane transport	1/263	15/16374	0.215722	0.388643	0.319445	TUSC3	1
GO:2000060	positive regulation of ubiquitin-dependent protein catabolic process	1/263	15/16374	0.215722	0.388643	0.319445	PTK2B	1
GO:0009410	response to xenobiotic stimulus	3/263	100/16374	0.217083	0.390705	0.32114	ARNT2/HOMER1/SDK1	3
GO:0035264	multicellular organism growth	4/263	149/16374	0.218232	0.392383	0.322519	UNC79/ADARB1/APBA2/ATP8A2	4
GO:0006612	protein targeting to membrane	2/263	55/16374	0.221016	0.3966	0.325986	ANK3/CEMIP	2
GO:0070936	protein K48-linked ubiquitination	2/263	55/16374	0.221016	0.3966	0.325986	NEDD4L/TTC3	2
GO:0030900	forebrain development	3/263	101/16374	0.221287	0.396692	0.326061	SLC8A1/SEMA5A/CNTNAP2	3
GO:0030010	establishment of cell polarity	2/263	56/16374	0.226944	0.399799	0.328615	MAP2/PTK2B	2
GO:0032147	activation of protein kinase activity	2/263	56/16374	0.226944	0.399799	0.328615	PRKAG2/FGF13	2
GO:0006622	protein targeting to lysosome	1/263	16/16374	0.22833	0.399799	0.328615	SORL1	1
GO:0006984	ER-nucleus signaling pathway	1/263	16/16374	0.22833	0.399799	0.328615	NCK2	1
GO:0009991	response to extracellular stimulus	1/263	16/16374	0.22833	0.399799	0.328615	HTR4	1
GO:0019229	regulation of vasoconstriction	1/263	16/16374	0.22833	0.399799	0.328615	ASIC2	1
GO:0019430	removal of superoxide radicals	1/263	16/16374	0.22833	0.399799	0.328615	DHFR	1
GO:0021700	developmental maturation	1/263	16/16374	0.22833	0.399799	0.328615	CAMK2B	1
GO:0030033	microvillus assembly	1/263	16/16374	0.22833	0.399799	0.328615	ATP8B1	1
GO:0030214	hyaluronan catabolic process	1/263	16/16374	0.22833	0.399799	0.328615	CEMIP	1
GO:0030252	growth hormone secretion	1/263	16/16374	0.22833	0.399799	0.328615	KALRN	1
GO:0032012	regulation of ARF protein signal transduction	1/263	16/16374	0.22833	0.399799	0.328615	IQSEC2	1
GO:0032270	positive regulation of cellular protein metabolic process	1/263	16/16374	0.22833	0.399799	0.328615	INHBA	1
GO:0034390	smooth muscle cell apoptotic process	1/263	16/16374	0.22833	0.399799	0.328615	PDE1A	1
GO:0035970	peptidyl-threonine dephosphorylation	1/263	16/16374	0.22833	0.399799	0.328615	PPM1E	1
GO:0035988	chondrocyte proliferation	1/263	16/16374	0.22833	0.399799	0.328615	BMPR2	1
GO:0042176	regulation of protein catabolic process	1/263	16/16374	0.22833	0.399799	0.328615	NEDD4L	1
GO:0042326	negative regulation of phosphorylation	1/263	16/16374	0.22833	0.399799	0.328615	INHBA	1
GO:0051482	positive regulation of cytosolic calcium ion concentration involved in phospholipase C-activating G protein-coupled signaling pathway	1/263	16/16374	0.22833	0.399799	0.328615	GRM1	1
GO:0055119	relaxation of cardiac muscle	1/263	16/16374	0.22833	0.399799	0.328615	SLC8A1	1
GO:0060008	Sertoli cell differentiation	1/263	16/16374	0.22833	0.399799	0.328615	FNDC3A	1
GO:0070841	inclusion body assembly	1/263	16/16374	0.22833	0.399799	0.328615	SORL1	1
GO:0070886	positive regulation of calcineurin-NFAT signaling cascade	1/263	16/16374	0.22833	0.399799	0.328615	LMCD1	1
GO:0071732	cellular response to nitric oxide	1/263	16/16374	0.22833	0.399799	0.328615	KCNC2	1
GO:0009952	anterior/posterior pattern specification	3/263	103/16374	0.229744	0.401886	0.33033	ALDH1A2/MLLT3/BMPR2	3
GO:0007193	adenylate cyclase-inhibiting G protein-coupled receptor signaling pathway	2/263	57/16374	0.232882	0.406587	0.334194	GNAL/ADCY9	2
GO:0045732	positive regulation of protein catabolic process	2/263	57/16374	0.232882	0.406587	0.334194	SORL1/NSF	2
GO:0021549	cerebellum development	2/263	58/16374	0.23883	0.410002	0.337001	NLGN4X/CNTN1	2
GO:0050918	positive chemotaxis	2/263	58/16374	0.23883	0.410002	0.337001	CDH13/SEMA5A	2
GO:0002026	regulation of the force of heart contraction	1/263	17/16374	0.240737	0.410002	0.337001	SLC8A1	1
GO:0003198	epithelial to mesenchymal transition involved in endocardial cushion formation	1/263	17/16374	0.240737	0.410002	0.337001	ACVR1	1
GO:0003215	cardiac right ventricle morphogenesis	1/263	17/16374	0.240737	0.410002	0.337001	ZFPM2	1
GO:0006165	nucleoside diphosphate phosphorylation	1/263	17/16374	0.240737	0.410002	0.337001	AK5	1
GO:0006730	one-carbon metabolic process	1/263	17/16374	0.240737	0.410002	0.337001	DHFR	1
GO:0006855	drug transmembrane transport	1/263	17/16374	0.240737	0.410002	0.337001	ATP8B1	1
GO:0006978	DNA damage response, signal transduction by p53 class mediator resulting in transcription of p21 class mediator	1/263	17/16374	0.240737	0.410002	0.337001	RPS6KA6	1
GO:0007194	negative regulation of adenylate cyclase activity	1/263	17/16374	0.240737	0.410002	0.337001	GABBR2	1
GO:0007567	parturition	1/263	17/16374	0.240737	0.410002	0.337001	KALRN	1
GO:0008347	glial cell migration	1/263	17/16374	0.240737	0.410002	0.337001	EPHA4	1
GO:0009605	response to external stimulus	1/263	17/16374	0.240737	0.410002	0.337001	STRBP	1
GO:0010812	negative regulation of cell-substrate adhesion	1/263	17/16374	0.240737	0.410002	0.337001	PTPRO	1
GO:0010880	regulation of release of sequestered calcium ion into cytosol by sarcoplasmic reticulum	1/263	17/16374	0.240737	0.410002	0.337001	DMD	1
GO:0032793	positive regulation of CREB transcription factor activity	1/263	17/16374	0.240737	0.410002	0.337001	CAMK1D	1
GO:0042095	interferon-gamma biosynthetic process	1/263	17/16374	0.240737	0.410002	0.337001	INHBA	1
GO:0046425	regulation of receptor signaling pathway via JAK-STAT	1/263	17/16374	0.240737	0.410002	0.337001	PTK2B	1
GO:0048814	regulation of dendrite morphogenesis	1/263	17/16374	0.240737	0.410002	0.337001	ADGRB3	1
GO:0050709	negative regulation of protein secretion	1/263	17/16374	0.240737	0.410002	0.337001	FRMD4A	1
GO:0050850	positive regulation of calcium-mediated signaling	1/263	17/16374	0.240737	0.410002	0.337001	CDH13	1
GO:0050908	detection of light stimulus involved in visual perception	1/263	17/16374	0.240737	0.410002	0.337001	ATP8A2	1
GO:0061036	positive regulation of cartilage development	1/263	17/16374	0.240737	0.410002	0.337001	BMPR2	1
GO:0070932	histone H3 deacetylation	1/263	17/16374	0.240737	0.410002	0.337001	HDAC9	1
GO:0090303	positive regulation of wound healing	1/263	17/16374	0.240737	0.410002	0.337001	PRKCE	1
GO:0097320	plasma membrane tubulation	1/263	17/16374	0.240737	0.410002	0.337001	SH3GL2	1
GO:0018212	peptidyl-tyrosine modification	3/263	106/16374	0.24254	0.412683	0.339205	CNTN1/PRKCE/PTK2B	3
GO:0008406	gonad development	3/263	107/16374	0.246831	0.41959	0.344882	INHBA/BASP1/ZFPM2	3
GO:0007200	phospholipase C-activating G protein-coupled receptor signaling pathway	2/263	60/16374	0.250746	0.420876	0.345939	HRH1/GRM1	2
GO:0007266	Rho protein signal transduction	4/263	159/16374	0.252716	0.420876	0.345939	CDH13/TIAM1/ADRA1A/KALRN	4
GO:0003094	glomerular filtration	1/263	18/16374	0.252945	0.420876	0.345939	PTPRO	1
GO:0006892	post-Golgi vesicle-mediated transport	1/263	18/16374	0.252945	0.420876	0.345939	SORL1	1
GO:0031333	negative regulation of protein-containing complex assembly	1/263	18/16374	0.252945	0.420876	0.345939	STXBP1	1
GO:0032011	ARF protein signal transduction	1/263	18/16374	0.252945	0.420876	0.345939	IQSEC2	1
GO:0033555	multicellular organismal response to stress	1/263	18/16374	0.252945	0.420876	0.345939	PPP3CA	1
GO:0035269	protein O-linked mannosylation	1/263	18/16374	0.252945	0.420876	0.345939	LARGE1	1
GO:0036342	post-anal tail morphogenesis	1/263	18/16374	0.252945	0.420876	0.345939	CHST11	1
GO:0038083	peptidyl-tyrosine autophosphorylation	1/263	18/16374	0.252945	0.420876	0.345939	PTK2B	1
GO:0045638	negative regulation of myeloid cell differentiation	1/263	18/16374	0.252945	0.420876	0.345939	PTK2B	1
GO:0046655	folic acid metabolic process	1/263	18/16374	0.252945	0.420876	0.345939	DHFR	1
GO:0050730	regulation of peptidyl-tyrosine phosphorylation	1/263	18/16374	0.252945	0.420876	0.345939	PRKCE	1
GO:0050775	positive regulation of dendrite morphogenesis	1/263	18/16374	0.252945	0.420876	0.345939	EPHA4	1
GO:0050954	sensory perception of mechanical stimulus	1/263	18/16374	0.252945	0.420876	0.345939	ASIC2	1
GO:0060317	cardiac epithelial to mesenchymal transition	1/263	18/16374	0.252945	0.420876	0.345939	ACVR1	1
GO:0071404	cellular response to low-density lipoprotein particle stimulus	1/263	18/16374	0.252945	0.420876	0.345939	CDH13	1
GO:0090174	organelle membrane fusion	1/263	18/16374	0.252945	0.420876	0.345939	STXBP1	1
GO:0097106	postsynaptic density organization	1/263	18/16374	0.252945	0.420876	0.345939	TMEM108	1
GO:0098927	vesicle-mediated transport between endosomal compartments	1/263	18/16374	0.252945	0.420876	0.345939	SORL1	1
GO:1903514	release of sequestered calcium ion into cytosol by endoplasmic reticulum	1/263	18/16374	0.252945	0.420876	0.345939	DMD	1
GO:1904385	cellular response to angiotensin	1/263	18/16374	0.252945	0.420876	0.345939	CAMK2A	1
GO:2000114	regulation of establishment of cell polarity	1/263	18/16374	0.252945	0.420876	0.345939	PTK2B	1
GO:0009612	response to mechanical stimulus	2/263	61/16374	0.256711	0.425965	0.350122	STRBP/PTK2B	2
GO:0045669	positive regulation of osteoblast differentiation	2/263	61/16374	0.256711	0.425965	0.350122	BMPR2/ACVR1	2
GO:0045814	negative regulation of gene expression, epigenetic	2/263	61/16374	0.256711	0.425965	0.350122	JARID2/AEBP2	2
GO:0072657	protein localization to membrane	3/263	110/16374	0.259773	0.430652	0.353974	TIAM1/PRKCE/ANK3	3
GO:0007281	germ cell development	3/263	111/16374	0.264108	0.433284	0.356137	ACVR1/CELF4/PTK2B	3
GO:0002043	blood vessel endothelial cell proliferation involved in sprouting angiogenesis	1/263	19/16374	0.264958	0.433284	0.356137	SEMA5A	1
GO:0003177	pulmonary valve development	1/263	19/16374	0.264958	0.433284	0.356137	BMPR2	1
GO:0003382	epithelial cell morphogenesis	1/263	19/16374	0.264958	0.433284	0.356137	SIPA1L3	1
GO:0010996	response to auditory stimulus	1/263	19/16374	0.264958	0.433284	0.356137	ATP8A2	1
GO:0015721	bile acid and bile salt transport	1/263	19/16374	0.264958	0.433284	0.356137	ATP8B1	1
GO:0033189	response to vitamin A	1/263	19/16374	0.264958	0.433284	0.356137	ALDH1A2	1
GO:0044255	cellular lipid metabolic process	1/263	19/16374	0.264958	0.433284	0.356137	PRKAG2	1
GO:0045862	positive regulation of proteolysis	1/263	19/16374	0.264958	0.433284	0.356137	CYFIP2	1
GO:0048025	negative regulation of mRNA splicing, via spliceosome	1/263	19/16374	0.264958	0.433284	0.356137	CELF4	1
GO:0051641	cellular localization	1/263	19/16374	0.264958	0.433284	0.356137	GRIK5	1
GO:0072132	mesenchyme morphogenesis	1/263	19/16374	0.264958	0.433284	0.356137	ACVR1	1
GO:0097503	sialylation	1/263	19/16374	0.264958	0.433284	0.356137	ST6GALNAC5	1
GO:0099175	regulation of postsynapse organization	1/263	19/16374	0.264958	0.433284	0.356137	DGKB	1
GO:2000249	regulation of actin cytoskeleton reorganization	1/263	19/16374	0.264958	0.433284	0.356137	PTK2B	1
GO:0048207	vesicle targeting, rough ER to cis-Golgi	2/263	63/16374	0.268646	0.438522	0.360443	NSF/GRIA1	2
GO:0071277	cellular response to calcium ion	2/263	63/16374	0.268646	0.438522	0.360443	SYT1/KCNH1	2
GO:0048208	COPII vesicle coating	2/263	64/16374	0.274614	0.444962	0.365736	NSF/GRIA1	2
GO:0051291	protein heterooligomerization	2/263	64/16374	0.274614	0.444962	0.365736	SYT1/KCNC2	2
GO:0006414	translational elongation	1/263	20/16374	0.276778	0.444962	0.365736	GRM5	1
GO:0007413	axonal fasciculation	1/263	20/16374	0.276778	0.444962	0.365736	SEMA5A	1
GO:0010592	positive regulation of lamellipodium assembly	1/263	20/16374	0.276778	0.444962	0.365736	AUTS2	1
GO:0014044	Schwann cell development	1/263	20/16374	0.276778	0.444962	0.365736	ADAM22	1
GO:0021799	cerebral cortex radially oriented cell migration	1/263	20/16374	0.276778	0.444962	0.365736	LAMB1	1
GO:0022618	ribonucleoprotein complex assembly	1/263	20/16374	0.276778	0.444962	0.365736	CELF2	1
GO:0034067	protein localization to Golgi apparatus	1/263	20/16374	0.276778	0.444962	0.365736	SORL1	1
GO:0043984	histone H4-K16 acetylation	1/263	20/16374	0.276778	0.444962	0.365736	AUTS2	1
GO:0045321	leukocyte activation	1/263	20/16374	0.276778	0.444962	0.365736	NCK2	1
GO:0045730	respiratory burst	1/263	20/16374	0.276778	0.444962	0.365736	CAMK1D	1
GO:0050768	negative regulation of neurogenesis	1/263	20/16374	0.276778	0.444962	0.365736	SORL1	1
GO:0050879	multicellular organismal movement	1/263	20/16374	0.276778	0.444962	0.365736	HOMER1	1
GO:0071526	semaphorin-plexin signaling pathway	1/263	20/16374	0.276778	0.444962	0.365736	PLXNA4	1
GO:0071901	negative regulation of protein serine/threonine kinase activity	1/263	20/16374	0.276778	0.444962	0.365736	PRKAG2	1
GO:1902017	regulation of cilium assembly	1/263	20/16374	0.276778	0.444962	0.365736	ADAMTS16	1
GO:0071300	cellular response to retinoic acid	2/263	65/16374	0.280579	0.450672	0.37043	ALDH1A2/PTK2B	2
GO:0006898	receptor-mediated endocytosis	4/263	168/16374	0.284648	0.455156	0.374115	SORL1/TMEM108/SH3GL2/SNAP91	4
GO:0034605	cellular response to heat	3/263	116/16374	0.2859	0.455156	0.374115	CAMK2B/ARPP21/CAMK2A	3
GO:0046330	positive regulation of JNK cascade	2/263	66/16374	0.28654	0.455156	0.374115	SH3RF3/PTK2B	2
GO:0006970	response to osmotic stress	1/263	21/16374	0.288408	0.455156	0.374115	PTK2B	1
GO:0007026	negative regulation of microtubule depolymerization	1/263	21/16374	0.288408	0.455156	0.374115	FGF13	1
GO:0008361	regulation of cell size	1/263	21/16374	0.288408	0.455156	0.374115	RAP1GAP2	1
GO:0010804	negative regulation of tumor necrosis factor-mediated signaling pathway	1/263	21/16374	0.288408	0.455156	0.374115	CCDC3	1
GO:0014850	response to muscle activity	1/263	21/16374	0.288408	0.455156	0.374115	RYR2	1
GO:0021695	cerebellar cortex development	1/263	21/16374	0.288408	0.455156	0.374115	SEZ6L	1
GO:0031290	retinal ganglion cell axon guidance	1/263	21/16374	0.288408	0.455156	0.374115	PTPRO	1
GO:0035024	negative regulation of Rho protein signal transduction	1/263	21/16374	0.288408	0.455156	0.374115	ADRA1A	1
GO:0036010	protein localization to endosome	1/263	21/16374	0.288408	0.455156	0.374115	SORL1	1
GO:0036499	PERK-mediated unfolded protein response	1/263	21/16374	0.288408	0.455156	0.374115	NCK2	1
GO:0046903	secretion	1/263	21/16374	0.288408	0.455156	0.374115	RIMS1	1
GO:0048485	sympathetic nervous system development	1/263	21/16374	0.288408	0.455156	0.374115	PLXNA4	1
GO:0050771	negative regulation of axonogenesis	1/263	21/16374	0.288408	0.455156	0.374115	DAB1	1
GO:0080111	DNA demethylation	1/263	21/16374	0.288408	0.455156	0.374115	TET3	1
GO:0086004	regulation of cardiac muscle cell contraction	1/263	21/16374	0.288408	0.455156	0.374115	FGF13	1
GO:0090050	positive regulation of cell migration involved in sprouting angiogenesis	1/263	21/16374	0.288408	0.455156	0.374115	HDAC9	1
GO:1901576	organic substance biosynthetic process	1/263	21/16374	0.288408	0.455156	0.374115	CCDC3	1
GO:0006810	transport	3/263	117/16374	0.290278	0.457707	0.376212	SYT1/NSF/FGF14	3
GO:0032092	positive regulation of protein binding	2/263	67/16374	0.292497	0.460402	0.378427	SPON1/TIAM1	2
GO:0090114	COPII-coated vesicle budding	2/263	67/16374	0.292497	0.460402	0.378427	NSF/GRIA1	2
GO:0042493	response to drug	5/263	225/16374	0.295086	0.464074	0.381445	UNC79/INHBA/ADRA1A/DAB1/GABRA4	5
GO:0008206	bile acid metabolic process	1/263	22/16374	0.299852	0.467905	0.384594	ATP8B1	1
GO:0010460	positive regulation of heart rate	1/263	22/16374	0.299852	0.467905	0.384594	RYR2	1
GO:0010613	positive regulation of cardiac muscle hypertrophy	1/263	22/16374	0.299852	0.467905	0.384594	ADRA1A	1
GO:0014898	cardiac muscle hypertrophy in response to stress	1/263	22/16374	0.299852	0.467905	0.384594	PPP3CA	1
GO:0032941	secretion by tissue	1/263	22/16374	0.299852	0.467905	0.384594	PRKCE	1
GO:0060401	cytosolic calcium ion transport	1/263	22/16374	0.299852	0.467905	0.384594	SLC8A1	1
GO:0061912	selective autophagy	1/263	22/16374	0.299852	0.467905	0.384594	VPS13D	1
GO:0099625	ventricular cardiac muscle cell membrane repolarization	1/263	22/16374	0.299852	0.467905	0.384594	KCND3	1
GO:1900273	positive regulation of long-term synaptic potentiation	1/263	22/16374	0.299852	0.467905	0.384594	GRIN2A	1
GO:0007519	skeletal muscle tissue development	3/263	120/16374	0.303438	0.473092	0.388857	PPP3CA/HOMER1/HIVEP3	3
GO:0048194	Golgi vesicle budding	2/263	70/16374	0.310321	0.48132	0.395621	NSF/GRIA1	2
GO:0006397	mRNA processing	5/263	230/16374	0.310743	0.48132	0.395621	RBFOX2/ADARB1/RBFOX1/CELF4/RBFOX3	5
GO:0000083	regulation of transcription involved in G1/S transition of mitotic cell cycle	1/263	23/16374	0.311113	0.48132	0.395621	DHFR	1
GO:0001702	gastrulation with mouth forming second	1/263	23/16374	0.311113	0.48132	0.395621	ACVR1	1
GO:0009966	regulation of signal transduction	1/263	23/16374	0.311113	0.48132	0.395621	CNKSR2	1
GO:0048665	neuron fate specification	1/263	23/16374	0.311113	0.48132	0.395621	MYT1L	1
GO:0050881	musculoskeletal movement	1/263	23/16374	0.311113	0.48132	0.395621	HOMER1	1
GO:0051674	localization of cell	1/263	23/16374	0.311113	0.48132	0.395621	PHACTR1	1
GO:1901575	organic substance catabolic process	1/263	23/16374	0.311113	0.48132	0.395621	PRKCE	1
GO:0003151	outflow tract morphogenesis	2/263	71/16374	0.316243	0.488003	0.401114	BMPR2/ZFPM2	2
GO:0038127	ERBB signaling pathway	2/263	71/16374	0.316243	0.488003	0.401114	CDH13/SH3GL2	2
GO:0060021	roof of mouth development	2/263	71/16374	0.316243	0.488003	0.401114	INHBA/GABRB3	2
GO:0030036	actin cytoskeleton organization	5/263	233/16374	0.320194	0.492142	0.404516	NCK2/FHOD3/DIAPH2/SORBS2/PTK2B	5
GO:0001556	oocyte maturation	1/263	24/16374	0.322194	0.492142	0.404516	PTK2B	1
GO:0001678	cellular glucose homeostasis	1/263	24/16374	0.322194	0.492142	0.404516	PTPRN2	1
GO:0003203	endocardial cushion morphogenesis	1/263	24/16374	0.322194	0.492142	0.404516	ACVR1	1
GO:0010971	positive regulation of G2/M transition of mitotic cell cycle	1/263	24/16374	0.322194	0.492142	0.404516	MTA3	1
GO:0019934	cGMP-mediated signaling	1/263	24/16374	0.322194	0.492142	0.404516	PTK2B	1
GO:0030100	regulation of endocytosis	1/263	24/16374	0.322194	0.492142	0.404516	CDH13	1
GO:0031076	embryonic camera-type eye development	1/263	24/16374	0.322194	0.492142	0.404516	ALDH1A2	1
GO:0061025	membrane fusion	1/263	24/16374	0.322194	0.492142	0.404516	RIMS1	1
GO:0061647	histone H3-K9 modification	1/263	24/16374	0.322194	0.492142	0.404516	JARID2	1
GO:0072006	nephron development	1/263	24/16374	0.322194	0.492142	0.404516	PTPRO	1
GO:0090023	positive regulation of neutrophil chemotaxis	1/263	24/16374	0.322194	0.492142	0.404516	CAMK1D	1
GO:0014706	striated muscle tissue development	3/263	125/16374	0.325424	0.496657	0.408227	PPP3CA/HOMER1/HIVEP3	3
GO:0051260	protein homooligomerization	5/263	235/16374	0.326513	0.497898	0.409248	KCND2/SYT1/KCTD16/KCND3/KCNC2	5
GO:0042632	cholesterol homeostasis	2/263	73/16374	0.328052	0.499402	0.410483	GRAMD1B/HDAC9	2
GO:0061008	hepaticobiliary system development	2/263	73/16374	0.328052	0.499402	0.410483	ALDH1A2/JARID2	2
GO:0009954	proximal/distal pattern formation	1/263	25/16374	0.333097	0.503266	0.413659	ALDH1A2	1
GO:0016331	morphogenesis of embryonic epithelium	1/263	25/16374	0.333097	0.503266	0.413659	ALDH1A2	1
GO:0016571	histone methylation	1/263	25/16374	0.333097	0.503266	0.413659	JARID2	1
GO:0021517	ventral spinal cord development	1/263	25/16374	0.333097	0.503266	0.413659	DAB1	1
GO:0031116	positive regulation of microtubule polymerization	1/263	25/16374	0.333097	0.503266	0.413659	NIN	1
GO:0043113	receptor clustering	1/263	25/16374	0.333097	0.503266	0.413659	GRIK5	1
GO:0046717	acid secretion	1/263	25/16374	0.333097	0.503266	0.413659	GRM7	1
GO:0060045	positive regulation of cardiac muscle cell proliferation	1/263	25/16374	0.333097	0.503266	0.413659	ZFPM2	1
GO:1900740	positive regulation of protein insertion into mitochondrial membrane involved in apoptotic signaling pathway	1/263	25/16374	0.333097	0.503266	0.413659	PPP1R13B	1
GO:0030509	BMP signaling pathway	3/263	127/16374	0.334223	0.504124	0.414364	BMPR2/RYR2/ACVR1	3
GO:0031032	actomyosin structure organization	3/263	127/16374	0.334223	0.504124	0.414364	PHACTR1/FHOD3/PPM1E	3
GO:0006469	negative regulation of protein kinase activity	2/263	75/16374	0.339806	0.510839	0.419884	PRKAG2/PPM1E	2
GO:0007030	Golgi organization	2/263	75/16374	0.339806	0.510839	0.419884	SYNE1/PDE4DIP	2
GO:0008585	female gonad development	2/263	75/16374	0.339806	0.510839	0.419884	INHBA/ZFPM2	2
GO:0043112	receptor metabolic process	2/263	75/16374	0.339806	0.510839	0.419884	NSF/SH3GL2	2
GO:0031589	cell-substrate adhesion	4/263	184/16374	0.342615	0.511773	0.420651	CDH13/PRKCE/PTPRO/PTK2B	4
GO:0006906	vesicle fusion	1/263	26/16374	0.343825	0.511773	0.420651	STXBP1	1
GO:0022011	myelination in peripheral nervous system	1/263	26/16374	0.343825	0.511773	0.420651	ADAM22	1
GO:0030206	chondroitin sulfate biosynthetic process	1/263	26/16374	0.343825	0.511773	0.420651	CHST11	1
GO:0042327	positive regulation of phosphorylation	1/263	26/16374	0.343825	0.511773	0.420651	DSCAM	1
GO:0045070	positive regulation of viral genome replication	1/263	26/16374	0.343825	0.511773	0.420651	ADARB1	1
GO:0046854	phosphatidylinositol phosphorylation	1/263	26/16374	0.343825	0.511773	0.420651	TTC7B	1
GO:0048265	response to pain	1/263	26/16374	0.343825	0.511773	0.420651	CACNA1B	1
GO:0050953	sensory perception of light stimulus	1/263	26/16374	0.343825	0.511773	0.420651	ATP8A2	1
GO:0055074	calcium ion homeostasis	1/263	26/16374	0.343825	0.511773	0.420651	SLC8A1	1
GO:0070372	regulation of ERK1 and ERK2 cascade	1/263	26/16374	0.343825	0.511773	0.420651	TIAM1	1
GO:2001234	negative regulation of apoptotic signaling pathway	1/263	26/16374	0.343825	0.511773	0.420651	BDNF	1
GO:0021987	cerebral cortex development	2/263	76/16374	0.345659	0.514079	0.422547	FGF13/CNTNAP2	2
GO:0002244	hematopoietic progenitor cell differentiation	3/263	130/16374	0.34741	0.516258	0.424339	INHBA/SIPA1L3/KCNAB2	3
GO:0048515	spermatid differentiation	2/263	77/16374	0.351495	0.521047	0.428275	STRBP/FNDC3A	2
GO:1900034	regulation of cellular response to heat	2/263	77/16374	0.351495	0.521047	0.428275	CAMK2B/CAMK2A	2
GO:0071346	cellular response to interferon-gamma	3/263	131/16374	0.351801	0.521047	0.428275	CAMK2B/STXBP1/CAMK2A	3
GO:0071456	cellular response to hypoxia	4/263	187/16374	0.353558	0.521047	0.428275	SLC8A1/KCND2/PRKCE/SCN2A	4
GO:0001755	neural crest cell migration	1/263	27/16374	0.354381	0.521047	0.428275	ACVR1	1
GO:0002279	mast cell activation involved in immune response	1/263	27/16374	0.354381	0.521047	0.428275	STXBP1	1
GO:0003209	cardiac atrium morphogenesis	1/263	27/16374	0.354381	0.521047	0.428275	BMPR2	1
GO:0015949	nucleobase-containing small molecule interconversion	1/263	27/16374	0.354381	0.521047	0.428275	AK5	1
GO:0016482	cytosolic transport	1/263	27/16374	0.354381	0.521047	0.428275	SORL1	1
GO:0021954	central nervous system neuron development	1/263	27/16374	0.354381	0.521047	0.428275	MAP2	1
GO:0035116	embryonic hindlimb morphogenesis	1/263	27/16374	0.354381	0.521047	0.428275	AFF3	1
GO:0035767	endothelial cell chemotaxis	1/263	27/16374	0.354381	0.521047	0.428275	SEMA5A	1
GO:0042417	dopamine metabolic process	1/263	27/16374	0.354381	0.521047	0.428275	GRIN2A	1
GO:0006605	protein targeting	3/263	132/16374	0.356189	0.522807	0.429721	SORL1/ANK3/CEMIP	3
GO:0030324	lung development	3/263	132/16374	0.356189	0.522807	0.429721	ALDH1A2/BMPR2/ZFPM2	3
GO:0006796	phosphate-containing compound metabolic process	2/263	78/16374	0.357314	0.522807	0.429721	INHBA/DSCAM	2
GO:0007189	adenylate cyclase-activating G protein-coupled receptor signaling pathway	2/263	78/16374	0.357314	0.522807	0.429721	GNAL/ADCY9	2
GO:0031623	receptor internalization	2/263	78/16374	0.357314	0.522807	0.429721	GRIA1/SH3GL2	2
GO:0038096	Fc-gamma receptor signaling pathway involved in phagocytosis	2/263	78/16374	0.357314	0.522807	0.429721	CYFIP2/PRKCE	2
GO:0006886	intracellular protein transport	5/263	245/16374	0.358275	0.523788	0.430528	SORL1/NSF/RIMS2/AP3B2/RIMS1	5
GO:0007265	Ras protein signal transduction	5/263	246/16374	0.36146	0.527998	0.433988	AUTS2/TIAM1/ADRA1A/KALRN/DGKI	5
GO:0008610	lipid biosynthetic process	2/263	79/16374	0.363114	0.527998	0.433988	PRKAG2/CCDC3	2
GO:0003180	aortic valve morphogenesis	1/263	28/16374	0.364768	0.527998	0.433988	SLIT3	1
GO:0015914	phospholipid transport	1/263	28/16374	0.364768	0.527998	0.433988	ATP8A2	1
GO:0016339	calcium-dependent cell-cell adhesion via plasma membrane cell adhesion molecules	1/263	28/16374	0.364768	0.527998	0.433988	CDH13	1
GO:0042755	eating behavior	1/263	28/16374	0.364768	0.527998	0.433988	ATP8A2	1
GO:0045648	positive regulation of erythrocyte differentiation	1/263	28/16374	0.364768	0.527998	0.433988	INHBA	1
GO:0048247	lymphocyte chemotaxis	1/263	28/16374	0.364768	0.527998	0.433988	PTK2B	1
GO:0048864	stem cell development	1/263	28/16374	0.364768	0.527998	0.433988	ACVR1	1
GO:0050654	chondroitin sulfate proteoglycan metabolic process	1/263	28/16374	0.364768	0.527998	0.433988	CHST11	1
GO:0051204	protein insertion into mitochondrial membrane	1/263	28/16374	0.364768	0.527998	0.433988	PPP1R13B	1
GO:2000352	negative regulation of endothelial cell apoptotic process	1/263	28/16374	0.364768	0.527998	0.433988	SEMA5A	1
GO:0043524	negative regulation of neuron apoptotic process	3/263	134/16374	0.364953	0.527998	0.433988	GABRB3/STXBP1/PTK2B	3
GO:0016525	negative regulation of angiogenesis	2/263	80/16374	0.368894	0.532846	0.437973	ADGRB3/COL4A2	2
GO:0042692	muscle cell differentiation	2/263	80/16374	0.368894	0.532846	0.437973	SYNE1/HDAC9	2
GO:0030595	leukocyte chemotaxis	2/263	81/16374	0.374653	0.536504	0.44098	CAMK1D/PTK2B	2
GO:0001844	protein insertion into mitochondrial membrane involved in apoptotic signaling pathway	1/263	29/16374	0.374989	0.536504	0.44098	PPP1R13B	1
GO:0014031	mesenchymal cell development	1/263	29/16374	0.374989	0.536504	0.44098	ACVR1	1
GO:0014033	neural crest cell differentiation	1/263	29/16374	0.374989	0.536504	0.44098	ALDH1A2	1
GO:0032527	protein exit from endoplasmic reticulum	1/263	29/16374	0.374989	0.536504	0.44098	SORL1	1
GO:0042330	taxis	1/263	29/16374	0.374989	0.536504	0.44098	EPHA4	1
GO:0043001	Golgi to plasma membrane protein transport	1/263	29/16374	0.374989	0.536504	0.44098	ANK3	1
GO:0046427	positive regulation of receptor signaling pathway via JAK-STAT	1/263	29/16374	0.374989	0.536504	0.44098	PTK2B	1
GO:0046579	positive regulation of Ras protein signal transduction	1/263	29/16374	0.374989	0.536504	0.44098	DGKI	1
GO:0050650	chondroitin sulfate proteoglycan biosynthetic process	1/263	29/16374	0.374989	0.536504	0.44098	CHST11	1
GO:0051281	positive regulation of release of sequestered calcium ion into cytosol	1/263	29/16374	0.374989	0.536504	0.44098	CEMIP	1
GO:0071542	dopaminergic neuron differentiation	1/263	29/16374	0.374989	0.536504	0.44098	TIAM1	1
GO:0030183	B cell differentiation	2/263	82/16374	0.380391	0.543373	0.446625	INHBA/HDAC9	2
GO:0050731	positive regulation of peptidyl-tyrosine phosphorylation	2/263	82/16374	0.380391	0.543373	0.446625	CNTN1/PTK2B	2
GO:0050817	coagulation	3/263	138/16374	0.382418	0.54528	0.448193	PRKCE/DGKB/DGKI	3
GO:0001569	branching involved in blood vessel morphogenesis	1/263	30/16374	0.385046	0.54528	0.448193	ACVR1	1
GO:0006958	complement activation, classical pathway	1/263	30/16374	0.385046	0.54528	0.448193	SUSD4	1
GO:0007188	adenylate cyclase-modulating G protein-coupled receptor signaling pathway	1/263	30/16374	0.385046	0.54528	0.448193	CACNA1D	1
GO:0016071	mRNA metabolic process	1/263	30/16374	0.385046	0.54528	0.448193	PCBP3	1
GO:0030513	positive regulation of BMP signaling pathway	1/263	30/16374	0.385046	0.54528	0.448193	BMPR2	1
GO:0030902	hindbrain development	1/263	30/16374	0.385046	0.54528	0.448193	ALDH1A2	1
GO:0043278	response to morphine	1/263	30/16374	0.385046	0.54528	0.448193	PRKCE	1
GO:0043552	positive regulation of phosphatidylinositol 3-kinase activity	1/263	30/16374	0.385046	0.54528	0.448193	PTK2B	1
GO:0048483	autonomic nervous system development	1/263	30/16374	0.385046	0.54528	0.448193	PLXNA4	1
GO:0051491	positive regulation of filopodium assembly	1/263	30/16374	0.385046	0.54528	0.448193	TENM2	1
GO:0006935	chemotaxis	3/263	140/16374	0.391112	0.553438	0.454898	CDH13/EPHA4/PLXNA4	3
GO:0008219	cell death	5/263	256/16374	0.393329	0.555377	0.456492	SORL1/CACNA1A/ZFPM2/GRIN2B/PPP1R13B	5
GO:0007340	acrosome reaction	1/263	31/16374	0.394941	0.555377	0.456492	RIMS1	1
GO:0009409	response to cold	1/263	31/16374	0.394941	0.555377	0.456492	CDH8	1
GO:0018279	protein N-linked glycosylation via asparagine	1/263	31/16374	0.394941	0.555377	0.456492	TUSC3	1
GO:0035774	positive regulation of insulin secretion involved in cellular response to glucose stimulus	1/263	31/16374	0.394941	0.555377	0.456492	SYBU	1
GO:0042572	retinol metabolic process	1/263	31/16374	0.394941	0.555377	0.456492	ALDH1A2	1
GO:0048193	Golgi vesicle transport	1/263	31/16374	0.394941	0.555377	0.456492	SORL1	1
GO:0060485	mesenchyme development	1/263	31/16374	0.394941	0.555377	0.456492	ACVR1	1
GO:0009792	embryo development ending in birth or egg hatching	3/263	141/16374	0.395448	0.555657	0.456722	ALDH1A2/ACVR1/CELF4	3
GO:0003013	circulatory system process	2/263	85/16374	0.397469	0.557629	0.458343	HRH1/CACNA1B	2
GO:0035023	regulation of Rho protein signal transduction	2/263	85/16374	0.397469	0.557629	0.458343	TIAM1/KALRN	2
GO:0016049	cell growth	5/263	258/16374	0.399694	0.559997	0.460289	INHBA/BMPR2/MEG3/SLIT3/PTK2B	5
GO:0007599	hemostasis	3/263	142/16374	0.399776	0.559997	0.460289	PRKCE/DGKB/DGKI	3
GO:0001889	liver development	2/263	86/16374	0.403113	0.561639	0.461639	ALDH1A2/JARID2	2
GO:0060041	retina development in camera-type eye	2/263	86/16374	0.403113	0.561639	0.461639	BMPR2/CELF4	2
GO:0046777	protein autophosphorylation	4/263	201/16374	0.404513	0.561639	0.461639	CAMK2B/EPHA4/PTK2B/CAMK2A	4
GO:0001881	receptor recycling	1/263	32/16374	0.404678	0.561639	0.461639	NSF	1
GO:0006487	protein N-linked glycosylation	1/263	32/16374	0.404678	0.561639	0.461639	TUSC3	1
GO:0007019	microtubule depolymerization	1/263	32/16374	0.404678	0.561639	0.461639	FGF13	1
GO:0010811	positive regulation of cell-substrate adhesion	1/263	32/16374	0.404678	0.561639	0.461639	PRKCE	1
GO:0036465	synaptic vesicle recycling	1/263	32/16374	0.404678	0.561639	0.461639	FGF14	1
GO:0040018	positive regulation of multicellular organism growth	1/263	32/16374	0.404678	0.561639	0.461639	ATP8A2	1
GO:0048821	erythrocyte development	1/263	32/16374	0.404678	0.561639	0.461639	TMOD3	1
GO:0051567	histone H3-K9 methylation	1/263	32/16374	0.404678	0.561639	0.461639	JARID2	1
GO:1990868	response to chemokine	1/263	32/16374	0.404678	0.561639	0.461639	PTK2B	1
GO:0001701	in utero embryonic development	4/263	202/16374	0.408132	0.565997	0.465221	ARNT2/APBA2/ZFPM2/ACVR1	4
GO:0030323	respiratory tube development	2/263	87/16374	0.408733	0.566396	0.465549	ALDH1A2/ZFPM2	2
GO:0002181	cytoplasmic translation	1/263	33/16374	0.414259	0.571081	0.4694	JAKMIP1	1
GO:0007190	activation of adenylate cyclase activity	1/263	33/16374	0.414259	0.571081	0.4694	ADCY9	1
GO:0044260	cellular macromolecule metabolic process	1/263	33/16374	0.414259	0.571081	0.4694	INHBA	1
GO:0046677	response to antibiotic	1/263	33/16374	0.414259	0.571081	0.4694	UNC79	1
GO:0048566	embryonic digestive tract development	1/263	33/16374	0.414259	0.571081	0.4694	ALDH1A2	1
GO:0060350	endochondral bone morphogenesis	1/263	33/16374	0.414259	0.571081	0.4694	BMPR2	1
GO:0060333	interferon-gamma-mediated signaling pathway	2/263	88/16374	0.414326	0.571081	0.4694	CAMK2B/CAMK2A	2
GO:0002062	chondrocyte differentiation	2/263	89/16374	0.419894	0.578314	0.475345	BMPR2/CHST11	2
GO:0007507	heart development	5/263	265/16374	0.421912	0.580651	0.477266	ALDH1A2/BMPR2/HDAC9/MICAL2/CACNA1C	5
GO:0007589	body fluid secretion	1/263	34/16374	0.423686	0.581322	0.477817	PRKCE	1
GO:0042059	negative regulation of epidermal growth factor receptor signaling pathway	1/263	34/16374	0.423686	0.581322	0.477817	SH3GL2	1
GO:0043407	negative regulation of MAP kinase activity	1/263	34/16374	0.423686	0.581322	0.477817	SORL1	1
GO:0048536	spleen development	1/263	34/16374	0.423686	0.581322	0.477817	JARID2	1
GO:0034341	response to interferon-gamma	2/263	90/16374	0.425434	0.582553	0.47883	CAMK2B/CAMK2A	2
GO:0051289	protein homotetramerization	2/263	90/16374	0.425434	0.582553	0.47883	ALDH1A2/HCN1	2
GO:0010631	epithelial cell migration	3/263	148/16374	0.425551	0.582553	0.47883	BMPR2/PRKCE/PTK2B	3
GO:0006508	proteolysis	8/263	448/16374	0.431035	0.588243	0.483506	SPON1/AGBL4/CYFIP2/EPHA4/DPP6/ADAM22/TLL1/ADAMTS16	8
GO:0043043	peptide biosynthetic process	6/263	328/16374	0.431838	0.588243	0.483506	DMD/GRM5/ENC1/DHFR/CELF4/PTK2B	6
GO:0001893	maternal placenta development	1/263	35/16374	0.432962	0.588243	0.483506	BMPR2	1
GO:0006139	nucleobase-containing compound metabolic process	1/263	35/16374	0.432962	0.588243	0.483506	CRMP1	1
GO:0035094	response to nicotine	1/263	35/16374	0.432962	0.588243	0.483506	KCNK1	1
GO:0042177	negative regulation of protein catabolic process	1/263	35/16374	0.432962	0.588243	0.483506	GRIN2A	1
GO:0045214	sarcomere organization	1/263	35/16374	0.432962	0.588243	0.483506	FHOD3	1
GO:0048246	macrophage chemotaxis	1/263	35/16374	0.432962	0.588243	0.483506	PTK2B	1
GO:0097720	calcineurin-mediated signaling	1/263	35/16374	0.432962	0.588243	0.483506	LMCD1	1
GO:2001237	negative regulation of extrinsic apoptotic signaling pathway	1/263	35/16374	0.432962	0.588243	0.483506	ACVR1	1
GO:0033002	muscle cell proliferation	2/263	92/16374	0.436432	0.592511	0.487014	CDH13/PDE1A	2
GO:0000226	microtubule cytoskeleton organization	2/263	93/16374	0.441888	0.594829	0.48892	MAP2/CRMP1	2
GO:0035690	cellular response to drug	2/263	93/16374	0.441888	0.594829	0.48892	PPP3CA/PPM1E	2
GO:0045786	negative regulation of cell cycle	2/263	93/16374	0.441888	0.594829	0.48892	INHBA/PPP1R13B	2
GO:0006513	protein monoubiquitination	1/263	36/16374	0.44209	0.594829	0.48892	NEDD4L	1
GO:0014009	glial cell proliferation	1/263	36/16374	0.44209	0.594829	0.48892	PTK2B	1
GO:0014812	muscle cell migration	1/263	36/16374	0.44209	0.594829	0.48892	SORL1	1
GO:0021983	pituitary gland development	1/263	36/16374	0.44209	0.594829	0.48892	ALDH1A2	1
GO:0031023	microtubule organizing center organization	1/263	36/16374	0.44209	0.594829	0.48892	NIN	1
GO:0032467	positive regulation of cytokinesis	1/263	36/16374	0.44209	0.594829	0.48892	PRKCE	1
GO:0048599	oocyte development	1/263	36/16374	0.44209	0.594829	0.48892	PTK2B	1
GO:0071621	granulocyte chemotaxis	1/263	36/16374	0.44209	0.594829	0.48892	CAMK1D	1
GO:0150063	visual system development	1/263	36/16374	0.44209	0.594829	0.48892	SIPA1L3	1
GO:0018108	peptidyl-tyrosine phosphorylation	5/263	272/16374	0.443984	0.596568	0.490349	EPHA6/CNTN1/PRKCE/EPHA4/PTK2B	5
GO:0003006	developmental process involved in reproduction	4/263	212/16374	0.444042	0.596568	0.490349	STRBP/BASP1/FNDC3A/STXBP1	4
GO:0009790	embryo development	2/263	94/16374	0.447315	0.599327	0.492617	ZFPM2/RPS6KA6	2
GO:0043410	positive regulation of MAPK cascade	2/263	94/16374	0.447315	0.599327	0.492617	ADRA1A/PRKCE	2
GO:0048659	smooth muscle cell proliferation	2/263	94/16374	0.447315	0.599327	0.492617	CDH13/PDE1A	2
GO:0018105	peptidyl-serine phosphorylation	4/263	213/16374	0.4476	0.599327	0.492617	NCK2/PRKCE/DMD/CAMK2A	4
GO:0006470	protein dephosphorylation	3/263	154/16374	0.450935	0.599327	0.492617	PPP3CA/PTPRN2/PTPRO	3
GO:0006479	protein methylation	1/263	37/16374	0.451071	0.599327	0.492617	JARID2	1
GO:0010658	striated muscle cell apoptotic process	1/263	37/16374	0.451071	0.599327	0.492617	CAMK2A	1
GO:0010927	cellular component assembly involved in morphogenesis	1/263	37/16374	0.451071	0.599327	0.492617	FHOD3	1
GO:0030239	myofibril assembly	1/263	37/16374	0.451071	0.599327	0.492617	FHOD3	1
GO:0035265	organ growth	1/263	37/16374	0.451071	0.599327	0.492617	NLGN4X	1
GO:0048477	oogenesis	1/263	37/16374	0.451071	0.599327	0.492617	DIAPH2	1
GO:0050766	positive regulation of phagocytosis	1/263	37/16374	0.451071	0.599327	0.492617	CAMK1D	1
GO:0051262	protein tetramerization	1/263	37/16374	0.451071	0.599327	0.492617	HOMER1	1
GO:0071219	cellular response to molecule of bacterial origin	1/263	37/16374	0.451071	0.599327	0.492617	PRKCE	1
GO:1905517	macrophage migration	1/263	37/16374	0.451071	0.599327	0.492617	PTK2B	1
GO:0019886	antigen processing and presentation of exogenous peptide antigen via MHC class II	2/263	95/16374	0.452712	0.600184	0.493321	DYNC1I1/SH3GL2	2
GO:0043534	blood vessel endothelial cell migration	2/263	95/16374	0.452712	0.600184	0.493321	HDAC9/PTK2B	2
GO:1990778	protein localization to cell periphery	2/263	95/16374	0.452712	0.600184	0.493321	PRKCE/ANK3	2
GO:0050673	epithelial cell proliferation	5/263	275/16374	0.453385	0.600635	0.493692	ALDH1A2/CDH13/BMPR2/LAMB1/SEMA5A	5
GO:1901566	organonitrogen compound biosynthetic process	3/263	155/16374	0.455123	0.602496	0.495221	LARGE1/GALNT17/ST6GALNAC5	3
GO:0001578	microtubule bundle formation	1/263	38/16374	0.459907	0.605282	0.497512	MAP2	1
GO:0010659	cardiac muscle cell apoptotic process	1/263	38/16374	0.459907	0.605282	0.497512	CAMK2A	1
GO:0030225	macrophage differentiation	1/263	38/16374	0.459907	0.605282	0.497512	INHBA	1
GO:0032502	developmental process	1/263	38/16374	0.459907	0.605282	0.497512	GRM5	1
GO:0045429	positive regulation of nitric oxide biosynthetic process	1/263	38/16374	0.459907	0.605282	0.497512	PTK2B	1
GO:0048663	neuron fate commitment	1/263	38/16374	0.459907	0.605282	0.497512	MYT1L	1
GO:0048880	sensory system development	1/263	38/16374	0.459907	0.605282	0.497512	SIPA1L3	1
GO:0070918	production of small RNA involved in gene silencing by RNA	1/263	38/16374	0.459907	0.605282	0.497512	PPP3CA	1
GO:0030163	protein catabolic process	4/263	217/16374	0.461759	0.607277	0.499151	SORL1/NEDD4L/NSF/GRIN2A	4
GO:0001654	eye development	3/263	158/16374	0.467604	0.611843	0.502904	INHBA/TENM3/SIPA1L3	3
GO:0000186	activation of MAPKK activity	1/263	39/16374	0.468603	0.611843	0.502904	GRM1	1
GO:0008152	metabolic process	1/263	39/16374	0.468603	0.611843	0.502904	CAMK1D	1
GO:0030049	muscle filament sliding	1/263	39/16374	0.468603	0.611843	0.502904	DMD	1
GO:0032024	positive regulation of insulin secretion	1/263	39/16374	0.468603	0.611843	0.502904	PRKCE	1
GO:0043303	mast cell degranulation	1/263	39/16374	0.468603	0.611843	0.502904	STXBP1	1
GO:0048286	lung alveolus development	1/263	39/16374	0.468603	0.611843	0.502904	BMPR2	1
GO:0098773	skin epidermis development	1/263	39/16374	0.468603	0.611843	0.502904	INHBA	1
GO:0035335	peptidyl-tyrosine dephosphorylation	2/263	98/16374	0.468723	0.611843	0.502904	PTPRN2/PTPRO	2
GO:0042552	myelination	2/263	98/16374	0.468723	0.611843	0.502904	SCN8A/SCN2A	2
GO:0007596	blood coagulation	5/263	280/16374	0.468955	0.611843	0.502904	PRKCE/ZFPM2/DGKB/DGKI/PRKAR1B	5
GO:0048646	anatomical structure formation involved in morphogenesis	6/263	342/16374	0.471473	0.614683	0.505239	ADGRB3/ALDH1A2/COL4A2/SEMA5A/ACVR1/PTK2B	6
GO:0030198	extracellular matrix organization	4/263	221/16374	0.475791	0.619415	0.509128	COL4A2/LAMB1/COL6A3/TNR	4
GO:0000245	spliceosomal complex assembly	1/263	40/16374	0.477158	0.619415	0.509128	CELF2	1
GO:0001974	blood vessel remodeling	1/263	40/16374	0.477158	0.619415	0.509128	BMPR2	1
GO:0019395	fatty acid oxidation	1/263	40/16374	0.477158	0.619415	0.509128	PRKAG2	1
GO:0048232	male gamete generation	1/263	40/16374	0.477158	0.619415	0.509128	ADAMTS16	1
GO:1990266	neutrophil migration	1/263	40/16374	0.477158	0.619415	0.509128	CAMK1D	1
GO:0090090	negative regulation of canonical Wnt signaling pathway	3/263	161/16374	0.479957	0.622601	0.511747	MLLT3/PTPRO/SHISA6	3
GO:0065003	protein-containing complex assembly	4/263	223/16374	0.482756	0.625401	0.514048	SORL1/STXBP1/PTK2B/RIMS1	4
GO:0006259	DNA metabolic process	3/263	162/16374	0.484046	0.625401	0.514048	BMPR2/PAK3/PTK2B	3
GO:0042593	glucose homeostasis	2/263	101/16374	0.484452	0.625401	0.514048	CSMD1/STXBP5L	2
GO:0001932	regulation of protein phosphorylation	1/263	41/16374	0.485577	0.625401	0.514048	GRM5	1
GO:0006110	regulation of glycolytic process	1/263	41/16374	0.485577	0.625401	0.514048	PRKAG2	1
GO:0014823	response to activity	1/263	41/16374	0.485577	0.625401	0.514048	COL4A2	1
GO:0016575	histone deacetylation	1/263	41/16374	0.485577	0.625401	0.514048	HDAC9	1
GO:0019941	modification-dependent protein catabolic process	1/263	41/16374	0.485577	0.625401	0.514048	PTK2B	1
GO:0032456	endocytic recycling	1/263	41/16374	0.485577	0.625401	0.514048	SORL1	1
GO:0051591	response to cAMP	1/263	41/16374	0.485577	0.625401	0.514048	PTK2B	1
GO:0060071	Wnt signaling pathway, planar cell polarity pathway	2/263	102/16374	0.489631	0.630173	0.51797	MLLT3/TIAM1	2
GO:0006654	phosphatidic acid biosynthetic process	1/263	42/16374	0.49386	0.631568	0.519117	LCLAT1	1
GO:0006754	ATP biosynthetic process	1/263	42/16374	0.49386	0.631568	0.519117	PRKAG2	1
GO:0006801	superoxide metabolic process	1/263	42/16374	0.49386	0.631568	0.519117	DHFR	1
GO:0006997	nucleus organization	1/263	42/16374	0.49386	0.631568	0.519117	SYNE1	1
GO:0030155	regulation of cell adhesion	1/263	42/16374	0.49386	0.631568	0.519117	PTK2B	1
GO:0038034	signal transduction in absence of ligand	1/263	42/16374	0.49386	0.631568	0.519117	INHBA	1
GO:0043299	leukocyte degranulation	1/263	42/16374	0.49386	0.631568	0.519117	STXBP1	1
GO:0043616	keratinocyte proliferation	1/263	42/16374	0.49386	0.631568	0.519117	CDH13	1
GO:0061061	muscle structure development	1/263	42/16374	0.49386	0.631568	0.519117	SYNE1	1
GO:0006897	endocytosis	4/263	227/16374	0.496575	0.63459	0.521601	PPP3CA/CDH13/NEDD4L/MCTP1	4
GO:0000422	autophagy of mitochondrion	1/263	43/16374	0.502011	0.636138	0.522874	VPS13D	1
GO:0002455	humoral immune response mediated by circulating immunoglobulin	1/263	43/16374	0.502011	0.636138	0.522874	SUSD4	1
GO:0007292	female gamete generation	1/263	43/16374	0.502011	0.636138	0.522874	DIAPH2	1
GO:0021762	substantia nigra development	1/263	43/16374	0.502011	0.636138	0.522874	BASP1	1
GO:0021915	neural tube development	1/263	43/16374	0.502011	0.636138	0.522874	ALDH1A2	1
GO:0035196	production of miRNAs involved in gene silencing by miRNA	1/263	43/16374	0.502011	0.636138	0.522874	PPP3CA	1
GO:0043967	histone H4 acetylation	1/263	43/16374	0.502011	0.636138	0.522874	AUTS2	1
GO:0050714	positive regulation of protein secretion	1/263	43/16374	0.502011	0.636138	0.522874	FRMD4A	1
GO:0051145	smooth muscle cell differentiation	1/263	43/16374	0.502011	0.636138	0.522874	ACVR1	1
GO:0051568	histone H3-K4 methylation	1/263	43/16374	0.502011	0.636138	0.522874	AUTS2	1
GO:0060840	artery development	1/263	43/16374	0.502011	0.636138	0.522874	BMPR2	1
GO:0097581	lamellipodium organization	1/263	43/16374	0.502011	0.636138	0.522874	AUTS2	1
GO:0030336	negative regulation of cell migration	2/263	105/16374	0.50497	0.638993	0.52522	ADARB1/MCTP1	2
GO:0048762	mesenchymal cell differentiation	2/263	105/16374	0.50497	0.638993	0.52522	ALDH1A2/TIAM1	2
GO:0046907	intracellular transport	2/263	106/16374	0.510017	0.6418	0.527528	SORL1/STXBP1	2
GO:0002526	acute inflammatory response	1/263	44/16374	0.510031	0.6418	0.527528	ACVR1	1
GO:0002548	monocyte chemotaxis	1/263	44/16374	0.510031	0.6418	0.527528	PTPRO	1
GO:0007163	establishment or maintenance of cell polarity	1/263	44/16374	0.510031	0.6418	0.527528	PTK2B	1
GO:0010718	positive regulation of epithelial to mesenchymal transition	1/263	44/16374	0.510031	0.6418	0.527528	TIAM1	1
GO:0019935	cyclic-nucleotide-mediated signaling	1/263	44/16374	0.510031	0.6418	0.527528	PTK2B	1
GO:0048701	embryonic cranial skeleton morphogenesis	1/263	44/16374	0.510031	0.6418	0.527528	CHST11	1
GO:0050905	neuromuscular process	1/263	44/16374	0.510031	0.6418	0.527528	KCNAB2	1
GO:0060070	canonical Wnt signaling pathway	5/263	295/16374	0.514771	0.647315	0.53206	MLLT3/SEMA5A/RYR2/PTPRO/SHISA6	5
GO:0007405	neuroblast proliferation	1/263	45/16374	0.517922	0.649018	0.53346	FAM19A1	1
GO:0007602	phototransduction	1/263	45/16374	0.517922	0.649018	0.53346	ASIC2	1
GO:0021782	glial cell development	1/263	45/16374	0.517922	0.649018	0.53346	ADAM22	1
GO:0045599	negative regulation of fat cell differentiation	1/263	45/16374	0.517922	0.649018	0.53346	ZFPM2	1
GO:0072330	monocarboxylic acid biosynthetic process	1/263	45/16374	0.517922	0.649018	0.53346	PRKAG2	1
GO:0045137	development of primary sexual characteristics	2/263	108/16374	0.520009	0.651183	0.53524	INHBA/BASP1	2
GO:0048608	reproductive structure development	2/263	109/16374	0.524954	0.654662	0.538099	BMPR2/ZFPM2	2
GO:0016126	sterol biosynthetic process	1/263	46/16374	0.525686	0.654662	0.538099	PRKAG2	1
GO:0032880	regulation of protein localization	1/263	46/16374	0.525686	0.654662	0.538099	TBC1D1	1
GO:0046849	bone remodeling	1/263	46/16374	0.525686	0.654662	0.538099	PTK2B	1
GO:0048538	thymus development	1/263	46/16374	0.525686	0.654662	0.538099	JARID2	1
GO:0060324	face development	1/263	46/16374	0.525686	0.654662	0.538099	ALDH1A2	1
GO:0072171	mesonephric tubule morphogenesis	1/263	46/16374	0.525686	0.654662	0.538099	ADAMTS16	1
GO:1990869	cellular response to chemokine	1/263	46/16374	0.525686	0.654662	0.538099	PTK2B	1
GO:0045892	negative regulation of transcription, DNA-templated	8/263	488/16374	0.526999	0.655845	0.539072	MTA3/RBFOX2/JARID2/ATP8B1/LRRFIP1/HDAC9/BASP1/ZFPM2	8
GO:0061024	membrane organization	3/263	173/16374	0.527954	0.656582	0.539677	TBC1D1/SYT1/SH3GL2	3
GO:0007368	determination of left/right symmetry	2/263	110/16374	0.529865	0.658505	0.541258	MICAL2/ACVR1	2
GO:0007585	respiratory gaseous exchange by respiratory system	1/263	47/16374	0.533326	0.660082	0.542555	CHST11	1
GO:0010507	negative regulation of autophagy	1/263	47/16374	0.533326	0.660082	0.542555	ADRA1A	1
GO:0014909	smooth muscle cell migration	1/263	47/16374	0.533326	0.660082	0.542555	SORL1	1
GO:0016050	vesicle organization	1/263	47/16374	0.533326	0.660082	0.542555	STXBP1	1
GO:0021953	central nervous system neuron differentiation	1/263	47/16374	0.533326	0.660082	0.542555	MAP2	1
GO:0048704	embryonic skeletal system morphogenesis	1/263	47/16374	0.533326	0.660082	0.542555	CHST11	1
GO:0018209	peptidyl-serine modification	2/263	111/16374	0.534742	0.660929	0.54325	NCK2/DMD	2
GO:0042113	B cell activation	2/263	111/16374	0.534742	0.660929	0.54325	INHBA/HDAC9	2
GO:0007276	gamete generation	2/263	112/16374	0.539583	0.665285	0.546831	ACVR1/CELF4	2
GO:0007498	mesoderm development	1/263	48/16374	0.540843	0.665285	0.546831	RPS6KA6	1
GO:0007595	lactation	1/263	48/16374	0.540843	0.665285	0.546831	KALRN	1
GO:0030449	regulation of complement activation	1/263	48/16374	0.540843	0.665285	0.546831	SUSD4	1
GO:0045785	positive regulation of cell adhesion	1/263	48/16374	0.540843	0.665285	0.546831	PPP3CA	1
GO:0050790	regulation of catalytic activity	1/263	48/16374	0.540843	0.665285	0.546831	RIMS1	1
GO:1901701	cellular response to oxygen-containing compound	1/263	48/16374	0.540843	0.665285	0.546831	PRKCE	1
GO:0048598	embryonic morphogenesis	2/263	113/16374	0.54439	0.669192	0.550042	RYR2/ACVR1	2
GO:0022607	cellular component assembly	4/263	242/16374	0.546906	0.670731	0.551307	NLGN4X/LRFN5/CBLN2/STXBP1	4
GO:0043010	camera-type eye development	3/263	178/16374	0.54722	0.670731	0.551307	INHBA/TENM3/CACNA1C	3
GO:0072359	circulatory system development	3/263	178/16374	0.54722	0.670731	0.551307	HDAC9/MICAL2/CACNA1C	3
GO:0002931	response to ischemia	1/263	49/16374	0.54824	0.670731	0.551307	CAMK2A	1
GO:0032418	lysosome localization	1/263	49/16374	0.54824	0.670731	0.551307	STXBP1	1
GO:0060675	ureteric bud morphogenesis	1/263	49/16374	0.54824	0.670731	0.551307	ADAMTS16	1
GO:0090102	cochlea development	1/263	49/16374	0.54824	0.670731	0.551307	GABRB3	1
GO:0016311	dephosphorylation	2/263	115/16374	0.553899	0.675065	0.554869	PPP3CA/INPP4A	2
GO:0022412	cellular process involved in reproduction in multicellular organism	2/263	115/16374	0.553899	0.675065	0.554869	STRBP/FNDC3A	2
GO:0002064	epithelial cell development	1/263	50/16374	0.555518	0.675065	0.554869	SIPA1L3	1
GO:0006405	RNA export from nucleus	1/263	50/16374	0.555518	0.675065	0.554869	THOC3	1
GO:0006968	cellular defense response	1/263	50/16374	0.555518	0.675065	0.554869	PTK2B	1
GO:0031397	negative regulation of protein ubiquitination	1/263	50/16374	0.555518	0.675065	0.554869	PRKCE	1
GO:0032481	positive regulation of type I interferon production	1/263	50/16374	0.555518	0.675065	0.554869	LRRFIP1	1
GO:0045600	positive regulation of fat cell differentiation	1/263	50/16374	0.555518	0.675065	0.554869	CCDC3	1
GO:0060548	negative regulation of cell death	1/263	50/16374	0.555518	0.675065	0.554869	ZFPM2	1
GO:1903078	positive regulation of protein localization to plasma membrane	1/263	50/16374	0.555518	0.675065	0.554869	PRKCE	1
GO:0071495	cellular response to endogenous stimulus	4/263	245/16374	0.55666	0.675998	0.555636	RBFOX2/BMPR2/RYR2/ACVR1	4
GO:0007286	spermatid development	2/263	116/16374	0.558601	0.677646	0.556991	STRBP/FNDC3A	2
GO:0001541	ovarian follicle development	1/263	51/16374	0.562679	0.677646	0.556991	INHBA	1
GO:0001656	metanephros development	1/263	51/16374	0.562679	0.677646	0.556991	BASP1	1
GO:0002274	myeloid leukocyte activation	1/263	51/16374	0.562679	0.677646	0.556991	LRFN5	1
GO:0005977	glycogen metabolic process	1/263	51/16374	0.562679	0.677646	0.556991	PRKAG2	1
GO:0006417	regulation of translation	1/263	51/16374	0.562679	0.677646	0.556991	GRM5	1
GO:0031667	response to nutrient levels	1/263	51/16374	0.562679	0.677646	0.556991	HTR4	1
GO:0051496	positive regulation of stress fiber assembly	1/263	51/16374	0.562679	0.677646	0.556991	PPM1E	1
GO:0060538	skeletal muscle organ development	1/263	51/16374	0.562679	0.677646	0.556991	LARGE1	1
GO:0072332	intrinsic apoptotic signaling pathway by p53 class mediator	1/263	51/16374	0.562679	0.677646	0.556991	PPP1R13B	1
GO:1901215	negative regulation of neuron death	1/263	51/16374	0.562679	0.677646	0.556991	SORL1	1
GO:0000187	activation of MAPK activity	2/263	117/16374	0.563267	0.677646	0.556991	GRM1/PAK3	2
GO:0008015	blood circulation	2/263	117/16374	0.563267	0.677646	0.556991	HRH1/CACNA1B	2
GO:0033036	macromolecule localization	2/263	117/16374	0.563267	0.677646	0.556991	SORL1/TBC1D1	2
GO:0030099	myeloid cell differentiation	3/263	184/16374	0.569724	0.682688	0.561135	TMOD3/INHBA/PTK2B	3
GO:0000281	mitotic cytokinesis	1/263	52/16374	0.569725	0.682688	0.561135	ANK3	1
GO:0002253	activation of immune response	1/263	52/16374	0.569725	0.682688	0.561135	SUSD4	1
GO:0003012	muscle system process	1/263	52/16374	0.569725	0.682688	0.561135	DMD	1
GO:0009953	dorsal/ventral pattern formation	1/263	52/16374	0.569725	0.682688	0.561135	ACVR1	1
GO:0034101	erythrocyte homeostasis	1/263	52/16374	0.569725	0.682688	0.561135	INHBA	1
GO:0043065	positive regulation of apoptotic process	5/263	315/16374	0.573153	0.68634	0.564137	ALDH1A2/TIAM1/KALRN/CAMK1D/GRIN2A	5
GO:0031295	T cell costimulation	1/263	53/16374	0.576659	0.688712	0.566087	PAK3	1
GO:0031663	lipopolysaccharide-mediated signaling pathway	1/263	53/16374	0.576659	0.688712	0.566087	PRKCE	1
GO:0051290	protein heterotetramerization	1/263	53/16374	0.576659	0.688712	0.566087	GRIN2B	1
GO:0097696	receptor signaling pathway via STAT	1/263	53/16374	0.576659	0.688712	0.566087	DAB1	1
GO:0009408	response to heat	2/263	120/16374	0.577054	0.68873	0.566101	CAMK2B/CAMK2A	2
GO:0010001	glial cell differentiation	2/263	121/16374	0.581579	0.693672	0.570164	EPHA4/DAB1	2
GO:0002042	cell migration involved in sprouting angiogenesis	1/263	54/16374	0.58348	0.695022	0.571273	HDAC9	1
GO:0016064	immunoglobulin mediated immune response	1/263	54/16374	0.58348	0.695022	0.571273	SUSD4	1
GO:0030968	endoplasmic reticulum unfolded protein response	1/263	55/16374	0.590193	0.700708	0.575947	NCK2	1
GO:0035914	skeletal muscle cell differentiation	1/263	55/16374	0.590193	0.700708	0.575947	HIVEP3	1
GO:0042102	positive regulation of T cell proliferation	1/263	55/16374	0.590193	0.700708	0.575947	NCK2	1
GO:0044271	cellular nitrogen compound biosynthetic process	1/263	55/16374	0.590193	0.700708	0.575947	PTK2B	1
GO:0060173	limb development	1/263	55/16374	0.590193	0.700708	0.575947	BMPR2	1
GO:0016070	RNA metabolic process	1/263	56/16374	0.596797	0.706656	0.580835	RBFOX2	1
GO:0030301	cholesterol transport	1/263	56/16374	0.596797	0.706656	0.580835	GRAMD1B	1
GO:0035113	embryonic appendage morphogenesis	1/263	56/16374	0.596797	0.706656	0.580835	CHST11	1
GO:0043647	inositol phosphate metabolic process	1/263	56/16374	0.596797	0.706656	0.580835	INPP4A	1
GO:0007267	cell-cell signaling	6/263	389/16374	0.597157	0.706656	0.580835	INHBA/FGF13/ADRA1A/SEMA5A/FGF14/SHISA6	6
GO:0008584	male gonad development	2/263	125/16374	0.599322	0.70829	0.582179	INHBA/ZFPM2	2
GO:0048839	inner ear development	2/263	125/16374	0.599322	0.70829	0.582179	ATP8A2/GABRB3	2
GO:0000003	reproduction	1/263	57/16374	0.603296	0.710199	0.583748	FNDC3A	1
GO:0006939	smooth muscle contraction	1/263	57/16374	0.603296	0.710199	0.583748	ADRA1A	1
GO:0031016	pancreas development	1/263	57/16374	0.603296	0.710199	0.583748	ALDH1A2	1
GO:0045453	bone resorption	1/263	57/16374	0.603296	0.710199	0.583748	PTK2B	1
GO:0048593	camera-type eye morphogenesis	1/263	57/16374	0.603296	0.710199	0.583748	TENM3	1
GO:0048661	positive regulation of smooth muscle cell proliferation	1/263	57/16374	0.603296	0.710199	0.583748	CDH13	1
GO:0045766	positive regulation of angiogenesis	2/263	127/16374	0.60798	0.714468	0.587257	SEMA5A/PTK2B	2
GO:0030520	intracellular estrogen receptor signaling pathway	1/263	58/16374	0.60969	0.714468	0.587257	RBFOX2	1
GO:0030593	neutrophil chemotaxis	1/263	58/16374	0.60969	0.714468	0.587257	CAMK1D	1
GO:0048771	tissue remodeling	1/263	58/16374	0.60969	0.714468	0.587257	PTK2B	1
GO:0050679	positive regulation of epithelial cell proliferation	1/263	58/16374	0.60969	0.714468	0.587257	LAMB1	1
GO:0070059	intrinsic apoptotic signaling pathway in response to endoplasmic reticulum stress	1/263	58/16374	0.60969	0.714468	0.587257	NCK2	1
GO:0070527	platelet aggregation	1/263	58/16374	0.60969	0.714468	0.587257	STXBP1	1
GO:0002576	platelet degranulation	2/263	128/16374	0.612256	0.71701	0.589346	PHACTR2/STXBP1	2
GO:0001658	branching involved in ureteric bud morphogenesis	1/263	59/16374	0.615981	0.719043	0.591017	ADAMTS16	1
GO:0002262	myeloid cell homeostasis	1/263	59/16374	0.615981	0.719043	0.591017	INHBA	1
GO:0007588	excretion	1/263	59/16374	0.615981	0.719043	0.591017	NEDD4L	1
GO:0019953	sexual reproduction	1/263	59/16374	0.615981	0.719043	0.591017	FNDC3A	1
GO:0046209	nitric oxide metabolic process	1/263	59/16374	0.615981	0.719043	0.591017	PTK2B	1
GO:0001944	vasculature development	1/263	60/16374	0.622172	0.724864	0.595802	ALDH1A2	1
GO:0001947	heart looping	1/263	60/16374	0.622172	0.724864	0.595802	MICAL2	1
GO:0046847	filopodium assembly	1/263	60/16374	0.622172	0.724864	0.595802	TENM2	1
GO:0016043	cellular component organization	3/263	199/16374	0.622878	0.72522	0.596094	SYNE1/ANK3/DGKB	3
GO:1901796	regulation of signal transduction by p53 class mediator	2/263	131/16374	0.624869	0.727069	0.597614	PRKAG2/PPP1R13B	2
GO:0001756	somitogenesis	1/263	61/16374	0.628263	0.72953	0.599637	ALDH1A2	1
GO:0042733	embryonic digit morphogenesis	1/263	61/16374	0.628263	0.72953	0.599637	CHST11	1
GO:0097192	extrinsic apoptotic signaling pathway in absence of ligand	1/263	61/16374	0.628263	0.72953	0.599637	INHBA	1
GO:0001822	kidney development	2/263	132/16374	0.629002	0.72953	0.599637	ALDH1A2/BASP1	2
GO:0023014	signal transduction by protein phosphorylation	2/263	132/16374	0.629002	0.72953	0.599637	ADRA1A/PRKCE	2
GO:0009887	animal organ morphogenesis	4/263	269/16374	0.630412	0.730228	0.60021	ADARB1/BMPR2/RYR2/ACVR1	4
GO:0070371	ERK1 and ERK2 cascade	4/263	269/16374	0.630412	0.730228	0.60021	TIAM1/ADRA1A/RPS6KA6/PTK2B	4
GO:0003206	cardiac chamber morphogenesis	1/263	62/16374	0.634256	0.731865	0.601556	BMPR2	1
GO:0006633	fatty acid biosynthetic process	1/263	62/16374	0.634256	0.731865	0.601556	PRKAG2	1
GO:0006869	lipid transport	1/263	62/16374	0.634256	0.731865	0.601556	SORL1	1
GO:0006956	complement activation	1/263	62/16374	0.634256	0.731865	0.601556	SUSD4	1
GO:0009267	cellular response to starvation	1/263	62/16374	0.634256	0.731865	0.601556	BMPR2	1
GO:0046323	glucose import	1/263	62/16374	0.634256	0.731865	0.601556	PRKAG2	1
GO:0046034	ATP metabolic process	1/263	63/16374	0.640153	0.738198	0.606762	AK5	1
GO:0015031	protein transport	6/263	408/16374	0.643277	0.741328	0.609334	JAKMIP1/APBA2/STXBP5L/STXBP1/SNAP91/FRMD4A	6
GO:0044703	multi-organism reproductive process	2/263	136/16374	0.645184	0.742992	0.610702	KALRN/FNDC3A	2
GO:0007218	neuropeptide signaling pathway	1/263	64/16374	0.645955	0.742992	0.610702	SORCS3	1
GO:0061371	determination of heart left/right asymmetry	1/263	64/16374	0.645955	0.742992	0.610702	MICAL2	1
GO:0034612	response to tumor necrosis factor	2/263	137/16374	0.649141	0.745935	0.613121	AFF3/PTK2B	2
GO:0007178	transmembrane receptor protein serine/threonine kinase signaling pathway	3/263	207/16374	0.649339	0.745935	0.613121	BMPR2/CHST11/ACVR1	3
GO:0007098	centrosome cycle	1/263	65/16374	0.651664	0.746707	0.613756	NIN	1
GO:0042136	neurotransmitter biosynthetic process	1/263	65/16374	0.651664	0.746707	0.613756	PTK2B	1
GO:0043933	protein-containing complex subunit organization	1/263	65/16374	0.651664	0.746707	0.613756	STXBP1	1
GO:0045727	positive regulation of translation	1/263	65/16374	0.651664	0.746707	0.613756	PTK2B	1
GO:0071560	cellular response to transforming growth factor beta stimulus	2/263	138/16374	0.653063	0.747836	0.614684	COL4A2/ACVR1	2
GO:0006809	nitric oxide biosynthetic process	1/263	66/16374	0.657281	0.750763	0.61709	PTK2B	1
GO:0030512	negative regulation of transforming growth factor beta receptor signaling pathway	1/263	66/16374	0.657281	0.750763	0.61709	CHST11	1
GO:0045184	establishment of protein localization	1/263	66/16374	0.657281	0.750763	0.61709	ANK3	1
GO:0070373	negative regulation of ERK1 and ERK2 cascade	1/263	66/16374	0.657281	0.750763	0.61709	RPS6KA6	1
GO:0070887	cellular response to chemical stimulus	2/263	140/16374	0.660804	0.753267	0.619148	ARNT2/SEMA5A	2
GO:0071363	cellular response to growth factor stimulus	4/263	280/16374	0.661481	0.753267	0.619148	RBFOX2/BMPR2/RYR2/ACVR1	4
GO:0120031	plasma membrane bounded cell projection assembly	4/263	280/16374	0.661481	0.753267	0.619148	TENM2/AUTS2/ATP8B1/ADAMTS16	4
GO:0009967	positive regulation of signal transduction	1/263	67/16374	0.662808	0.753267	0.619148	HOMER1	1
GO:0016570	histone modification	1/263	67/16374	0.662808	0.753267	0.619148	JARID2	1
GO:0042116	macrophage activation	1/263	67/16374	0.662808	0.753267	0.619148	LRFN5	1
GO:0090305	nucleic acid phosphodiester bond hydrolysis	1/263	67/16374	0.662808	0.753267	0.619148	PGBD5	1
GO:1904019	epithelial cell apoptotic process	1/263	67/16374	0.662808	0.753267	0.619148	SEMA5A	1
GO:0010876	lipid localization	1/263	68/16374	0.668247	0.758017	0.623052	SORL1	1
GO:0035592	establishment of protein localization to extracellular region	1/263	68/16374	0.668247	0.758017	0.623052	FRMD4A	1
GO:0051603	proteolysis involved in cellular protein catabolic process	1/263	68/16374	0.668247	0.758017	0.623052	EPHA4	1
GO:0002252	immune effector process	1/263	69/16374	0.673598	0.762651	0.626861	SUSD4	1
GO:0051865	protein autoubiquitination	1/263	69/16374	0.673598	0.762651	0.626861	SH3RF3	1
GO:1902476	chloride transmembrane transport	1/263	69/16374	0.673598	0.762651	0.626861	GABRB3	1
GO:0007517	muscle organ development	2/263	144/16374	0.675869	0.764743	0.628581	DMD/COL6A3	2
GO:0001570	vasculogenesis	1/263	70/16374	0.678862	0.76669	0.630181	ZFPM2	1
GO:0007167	enzyme linked receptor protein signaling pathway	1/263	70/16374	0.678862	0.76669	0.630181	ACVR1	1
GO:0016241	regulation of macroautophagy	1/263	70/16374	0.678862	0.76669	0.630181	PRKAG2	1
GO:0000398	mRNA splicing, via spliceosome	4/263	287/16374	0.680314	0.76785	0.631134	SNRPN/RBFOX2/CELF4/CELF5	4
GO:0007259	receptor signaling pathway via JAK-STAT	1/263	71/16374	0.684043	0.771095	0.633801	DAB1	1
GO:0060326	cell chemotaxis	1/263	71/16374	0.684043	0.771095	0.633801	SEMA5A	1
GO:0001890	placenta development	1/263	72/16374	0.68914	0.775873	0.637728	BMPR2	1
GO:0072089	stem cell proliferation	1/263	72/16374	0.68914	0.775873	0.637728	FAM19A1	1
GO:0006936	muscle contraction	2/263	148/16374	0.690388	0.776793	0.638485	SLC8A1/DMD	2
GO:0001775	cell activation	1/263	73/16374	0.694155	0.779576	0.640772	STXBP1	1
GO:0032091	negative regulation of protein binding	1/263	73/16374	0.694155	0.779576	0.640772	SORL1	1
GO:0043085	positive regulation of catalytic activity	1/263	73/16374	0.694155	0.779576	0.640772	PRKCE	1
GO:0051092	positive regulation of NF-kappaB transcription factor activity	2/263	150/16374	0.697445	0.782784	0.643409	LRRFIP1/CAMK2A	2
GO:0007169	transmembrane receptor protein tyrosine kinase signaling pathway	3/263	223/16374	0.698237	0.783171	0.643727	TMEM108/CYFIP2/BDNF	3
GO:0006757	ATP generation from ADP	1/263	74/16374	0.699089	0.783171	0.643727	PRKAG2	1
GO:0031647	regulation of protein stability	1/263	74/16374	0.699089	0.783171	0.643727	NEDD4L	1
GO:0010256	endomembrane system organization	2/263	151/16374	0.700923	0.784253	0.644616	SYNE1/ANK3	2
GO:0043009	chordate embryonic development	2/263	151/16374	0.700923	0.784253	0.644616	ALDH1A2/ACVR1	2
GO:0000902	cell morphogenesis	1/263	76/16374	0.708722	0.78907	0.648576	PTPRO	1
GO:0006890	retrograde vesicle-mediated transport, Golgi to endoplasmic reticulum	1/263	76/16374	0.708722	0.78907	0.648576	NSF	1
GO:0009791	post-embryonic development	1/263	76/16374	0.708722	0.78907	0.648576	CHST11	1
GO:0016052	carbohydrate catabolic process	1/263	76/16374	0.708722	0.78907	0.648576	PRKAG2	1
GO:0030879	mammary gland development	1/263	76/16374	0.708722	0.78907	0.648576	KALRN	1
GO:0031124	mRNA 3'-end processing	1/263	76/16374	0.708722	0.78907	0.648576	THOC3	1
GO:0042471	ear morphogenesis	1/263	76/16374	0.708722	0.78907	0.648576	ATP8A2	1
GO:0048738	cardiac muscle tissue development	1/263	76/16374	0.708722	0.78907	0.648576	ALDH1A2	1
GO:0001942	hair follicle development	1/263	77/16374	0.713422	0.791377	0.650472	INHBA	1
GO:0006874	cellular calcium ion homeostasis	1/263	77/16374	0.713422	0.791377	0.650472	RYR2	1
GO:0022617	extracellular matrix disassembly	1/263	77/16374	0.713422	0.791377	0.650472	TLL1	1
GO:0030098	lymphocyte differentiation	1/263	77/16374	0.713422	0.791377	0.650472	INHBA	1
GO:0042089	cytokine biosynthetic process	1/263	77/16374	0.713422	0.791377	0.650472	INHBA	1
GO:0045666	positive regulation of neuron differentiation	1/263	77/16374	0.713422	0.791377	0.650472	DAB1	1
GO:0001666	response to hypoxia	3/263	229/16374	0.715193	0.792855	0.651687	ARNT2/RYR2/PTK2B	3
GO:0048589	developmental growth	2/263	156/16374	0.717822	0.793099	0.651888	CHST11/ATP8A2	2
GO:0048863	stem cell differentiation	2/263	156/16374	0.717822	0.793099	0.651888	ALDH1A2/JARID2	2
GO:0016197	endosomal transport	1/263	78/16374	0.718047	0.793099	0.651888	SORL1	1
GO:0030038	contractile actin filament bundle assembly	1/263	78/16374	0.718047	0.793099	0.651888	PPM1E	1
GO:0035108	limb morphogenesis	1/263	78/16374	0.718047	0.793099	0.651888	CHST11	1
GO:0090596	sensory organ morphogenesis	1/263	78/16374	0.718047	0.793099	0.651888	ATP8A2	1
GO:0006368	transcription elongation from RNA polymerase II promoter	1/263	79/16374	0.722597	0.797638	0.655618	MLLT3	1
GO:0002790	peptide secretion	1/263	80/16374	0.727074	0.801112	0.658474	FRMD4A	1
GO:0006805	xenobiotic metabolic process	1/263	80/16374	0.727074	0.801112	0.658474	ARNT2	1
GO:0030307	positive regulation of cell growth	1/263	80/16374	0.727074	0.801112	0.658474	PTK2B	1
GO:0009636	response to toxic substance	1/263	81/16374	0.73148	0.804005	0.660851	UNC79	1
GO:0019079	viral genome replication	1/263	81/16374	0.73148	0.804005	0.660851	ADARB1	1
GO:0030901	midbrain development	1/263	81/16374	0.73148	0.804005	0.660851	BASP1	1
GO:0048041	focal adhesion assembly	1/263	81/16374	0.73148	0.804005	0.660851	PTK2B	1
GO:0000377	RNA splicing, via transesterification reactions with bulged adenosine as nucleophile	1/263	82/16374	0.735814	0.806806	0.663154	CELF4	1
GO:0044706	multi-multicellular organism process	1/263	82/16374	0.735814	0.806806	0.663154	KALRN	1
GO:0098869	cellular oxidant detoxification	1/263	82/16374	0.735814	0.806806	0.663154	DHFR	1
GO:1903508	positive regulation of nucleic acid-templated transcription	1/263	82/16374	0.735814	0.806806	0.663154	MTA3	1
GO:0033209	tumor necrosis factor-mediated signaling pathway	2/263	162/16374	0.737036	0.807656	0.663853	CCDC3/PTK2B	2
GO:0016485	protein processing	1/263	83/16374	0.740079	0.809517	0.665382	SPON1	1
GO:0042472	inner ear morphogenesis	1/263	83/16374	0.740079	0.809517	0.665382	ATP8A2	1
GO:0050728	negative regulation of inflammatory response	1/263	83/16374	0.740079	0.809517	0.665382	LRFN5	1
GO:0006629	lipid metabolic process	3/263	239/16374	0.741809	0.810919	0.666535	PRKCE/PTPRN2/CCDC3	3
GO:0009611	response to wounding	4/263	313/16374	0.743785	0.812588	0.667906	PRKCE/ZFPM2/GRIN2A/PRKAR1B	4
GO:0009566	fertilization	1/263	84/16374	0.744275	0.812631	0.667942	FNDC3A	1
GO:0023061	signal release	1/263	85/16374	0.748404	0.815661	0.670432	HDAC9	1
GO:0071466	cellular response to xenobiotic stimulus	1/263	85/16374	0.748404	0.815661	0.670432	ARNT2	1
GO:0071774	response to fibroblast growth factor	1/263	85/16374	0.748404	0.815661	0.670432	RBFOX2	1
GO:0007179	transforming growth factor beta receptor signaling pathway	2/263	166/16374	0.74922	0.816058	0.670758	CHST11/ACVR1	2
GO:0060429	epithelium development	3/263	243/16374	0.75189	0.818114	0.672449	INHBA/RYR2/ACVR1	3
GO:0000910	cytokinesis	1/263	86/16374	0.752466	0.818114	0.672449	PRKCE	1
GO:0034446	substrate adhesion-dependent cell spreading	1/263	86/16374	0.752466	0.818114	0.672449	LAMB1	1
GO:0007254	JNK cascade	2/263	168/16374	0.755128	0.820515	0.674422	SH3RF3/PTK2B	2
GO:0050821	protein stabilization	2/263	169/16374	0.758037	0.822686	0.676207	EPHA4/STXBP1	2
GO:0072331	signal transduction by p53 class mediator	2/263	169/16374	0.758037	0.822686	0.676207	PRKAG2/PPP1R13B	2
GO:1903409	reactive oxygen species biosynthetic process	1/263	88/16374	0.760395	0.824751	0.677903	PTK2B	1
GO:0030326	embryonic limb morphogenesis	1/263	89/16374	0.764265	0.827457	0.680128	CHST11	1
GO:0035270	endocrine system development	1/263	89/16374	0.764265	0.827457	0.680128	ALDH1A2	1
GO:0046649	lymphocyte activation	1/263	89/16374	0.764265	0.827457	0.680128	NCK2	1
GO:0070374	positive regulation of ERK1 and ERK2 cascade	2/263	172/16374	0.766586	0.829474	0.681786	ADRA1A/PTK2B	2
GO:0048568	embryonic organ development	1/263	91/16374	0.771818	0.833652	0.68522	ZFPM2	1
GO:0061351	neural precursor cell proliferation	1/263	91/16374	0.771818	0.833652	0.68522	FAM19A1	1
GO:0006412	translation	6/263	471/16374	0.771832	0.833652	0.68522	JAKMIP1/GRM5/ENC1/DHFR/CELF4/PTK2B	6
GO:0097191	extrinsic apoptotic signaling pathway	2/263	175/16374	0.774872	0.835122	0.686428	INHBA/ACVR1	2
GO:0006096	glycolytic process	1/263	92/16374	0.775503	0.835122	0.686428	PRKAG2	1
GO:0045165	cell fate commitment	1/263	92/16374	0.775503	0.835122	0.686428	MYT1L	1
GO:0046546	development of primary male sexual characteristics	1/263	92/16374	0.775503	0.835122	0.686428	INHBA	1
GO:0071396	cellular response to lipid	1/263	92/16374	0.775503	0.835122	0.686428	PRKCE	1
GO:0007050	cell cycle arrest	2/263	176/16374	0.777577	0.836856	0.687854	INHBA/PRKAG2	2
GO:0006631	fatty acid metabolic process	1/263	93/16374	0.779129	0.837529	0.688407	PRKAG2	1
GO:0051726	regulation of cell cycle	1/263	93/16374	0.779129	0.837529	0.688407	ADARB1	1
GO:0007229	integrin-mediated signaling pathway	1/263	94/16374	0.782697	0.839866	0.690327	PTK2B	1
GO:0033365	protein localization to organelle	1/263	94/16374	0.782697	0.839866	0.690327	SORL1	1
GO:1990830	cellular response to leukemia inhibitory factor	1/263	94/16374	0.782697	0.839866	0.690327	JARID2	1
GO:0001568	blood vessel development	1/263	95/16374	0.786208	0.842632	0.692601	ALDH1A2	1
GO:1904659	glucose transmembrane transport	1/263	95/16374	0.786208	0.842632	0.692601	PRKAG2	1
GO:0006606	protein import into nucleus	1/263	96/16374	0.789662	0.845832	0.695232	PPP3CA	1
GO:0016055	Wnt signaling pathway	5/263	410/16374	0.791515	0.847315	0.69645	MLLT3/TIAM1/SEMA5A/PTPRO/SHISA6	5
GO:0071559	response to transforming growth factor beta	1/263	97/16374	0.79306	0.848466	0.697397	ACVR1	1
GO:0043312	neutrophil degranulation	6/263	484/16374	0.79353	0.848467	0.697397	ABCA13/SNAP25/LRRC7/PTPRN2/ATP8B4/KCNAB2	6
GO:0016042	lipid catabolic process	1/263	98/16374	0.796404	0.851036	0.699509	PRKCE	1
GO:0045444	fat cell differentiation	2/263	184/16374	0.79821	0.852462	0.700681	ZFPM2/CCDC3	2
GO:0071427	mRNA-containing ribonucleoprotein complex export from nucleus	1/263	99/16374	0.799694	0.853238	0.701319	THOC3	1
GO:0002446	neutrophil mediated immunity	6/263	488/16374	0.799881	0.853238	0.701319	ABCA13/SNAP25/LRRC7/PTPRN2/ATP8B4/KCNAB2	6
GO:0006959	humoral immune response	1/263	100/16374	0.802931	0.855481	0.703162	SUSD4	1
GO:0008543	fibroblast growth factor receptor signaling pathway	1/263	100/16374	0.802931	0.855481	0.703162	RBFOX2	1
GO:0042110	T cell activation	2/263	187/16374	0.805502	0.857715	0.704998	PPP3CA/NCK2	2
GO:0006090	pyruvate metabolic process	1/263	101/16374	0.806115	0.857863	0.70512	PRKAG2	1
GO:0002444	myeloid leukocyte mediated immunity	6/263	494/16374	0.809125	0.860558	0.707336	ABCA13/SNAP25/LRRC7/PTPRN2/ATP8B4/KCNAB2	6
GO:0006406	mRNA export from nucleus	1/263	103/16374	0.812332	0.862953	0.709304	THOC3	1
GO:0010951	negative regulation of endopeptidase activity	1/263	103/16374	0.812332	0.862953	0.709304	COL6A3	1
GO:0071407	cellular response to organic cyclic compound	1/263	104/16374	0.815365	0.865667	0.711535	PAK3	1
GO:0001525	angiogenesis	5/263	425/16374	0.816437	0.866295	0.712051	ADGRB3/COL4A2/SEMA5A/ACVR1/PTK2B	5
GO:0006396	RNA processing	1/263	105/16374	0.81835	0.867307	0.712883	CELF2	1
GO:0044344	cellular response to fibroblast growth factor stimulus	1/263	105/16374	0.81835	0.867307	0.712883	RBFOX2	1
GO:0002573	myeloid leukocyte differentiation	1/263	106/16374	0.821286	0.869236	0.714468	INHBA	1
GO:0006661	phosphatidylinositol biosynthetic process	1/263	106/16374	0.821286	0.869236	0.714468	INPP4A	1
GO:0051607	defense response to virus	2/263	194/16374	0.821613	0.869236	0.714468	AGBL4/ADARB1	2
GO:0001837	epithelial to mesenchymal transition	1/263	107/16374	0.824176	0.870418	0.71544	TIAM1	1
GO:0008203	cholesterol metabolic process	1/263	107/16374	0.824176	0.870418	0.71544	SORL1	1
GO:0051091	positive regulation of DNA-binding transcription factor activity	1/263	107/16374	0.824176	0.870418	0.71544	PPP3CA	1
GO:0072001	renal system development	1/263	108/16374	0.827018	0.87291	0.717488	ALDH1A2	1
GO:0009617	response to bacterium	1/263	109/16374	0.829815	0.87424	0.718581	DGKB	1
GO:0032870	cellular response to hormone stimulus	1/263	109/16374	0.829815	0.87424	0.718581	SLIT3	1
GO:0051259	protein complex oligomerization	1/263	109/16374	0.829815	0.87424	0.718581	SORL1	1
GO:0010469	regulation of signaling receptor activity	5/263	434/16374	0.830214	0.87424	0.718581	FAM19A1/INHBA/FGF13/FGF14/BDNF	5
GO:0038095	Fc-epsilon receptor signaling pathway	1/263	111/16374	0.835275	0.879057	0.722541	PPP3CA	1
GO:0002223	stimulatory C-type lectin receptor signaling pathway	1/263	112/16374	0.837938	0.881347	0.724423	PAK3	1
GO:0051403	stress-activated MAPK cascade	2/263	202/16374	0.838557	0.881485	0.724536	SH3RF3/PTK2B	2
GO:0043588	skin development	1/263	114/16374	0.843138	0.885271	0.727648	ATP8A2	1
GO:0071375	cellular response to peptide hormone stimulus	1/263	114/16374	0.843138	0.885271	0.727648	CAMK2A	1
GO:0032606	type I interferon production	1/263	115/16374	0.845675	0.886904	0.72899	LRRFIP1	1
GO:0044843	cell cycle G1/S phase transition	1/263	115/16374	0.845675	0.886904	0.72899	DHFR	1
GO:0010468	regulation of gene expression	1/263	116/16374	0.848172	0.889006	0.730718	APBA2	1
GO:0001649	osteoblast differentiation	2/263	208/16374	0.850297	0.890031	0.731561	BMPR2/ACVR1	2
GO:0006979	response to oxidative stress	1/263	117/16374	0.850628	0.890031	0.731561	MCTP1	1
GO:0034976	response to endoplasmic reticulum stress	1/263	117/16374	0.850628	0.890031	0.731561	NCK2	1
GO:0007601	visual perception	2/263	210/16374	0.854035	0.893079	0.734066	ATP8A2/RIMS1	2
GO:0044770	cell cycle phase transition	1/263	119/16374	0.855422	0.894012	0.734833	TMOD3	1
GO:0008360	regulation of cell shape	1/263	120/16374	0.857761	0.895421	0.735991	PTK2B	1
GO:0048732	gland development	1/263	120/16374	0.857761	0.895421	0.735991	KALRN	1
GO:0000209	protein polyubiquitination	2/263	219/16374	0.869827	0.906649	0.74522	HECTD2/NEDD4L	2
GO:0008284	positive regulation of cell population proliferation	5/263	464/16374	0.870189	0.906649	0.74522	MTA3/ARNT2/ALDH1A2/TIAM1/PTK2B	5
GO:0006457	protein folding	1/263	126/16374	0.871025	0.906649	0.74522	RGS7	1
GO:0007623	circadian rhythm	1/263	126/16374	0.871025	0.906649	0.74522	HS3ST2	1
GO:0051216	cartilage development	1/263	126/16374	0.871025	0.906649	0.74522	BMPR2	1
GO:0044772	mitotic cell cycle phase transition	3/263	309/16374	0.87667	0.911489	0.749198	MTA3/TMOD3/DHFR	3
GO:0008544	epidermis development	1/263	129/16374	0.877188	0.911489	0.749198	INHBA	1
GO:0042221	response to chemical	1/263	129/16374	0.877188	0.911489	0.749198	GABRA4	1
GO:0007283	spermatogenesis	4/263	392/16374	0.878406	0.911981	0.749603	SYNE1/MICAL2/ADGRG2/SHISA6	4
GO:0035195	gene silencing by miRNA	1/263	130/16374	0.879176	0.911981	0.749603	MEG3	1
GO:0090263	positive regulation of canonical Wnt signaling pathway	1/263	130/16374	0.879176	0.911981	0.749603	SEMA5A	1
GO:0097190	apoptotic signaling pathway	2/263	226/16374	0.88101	0.913359	0.750735	ACVR1/BDNF	2
GO:0006325	chromatin organization	1/263	134/16374	0.886814	0.918849	0.755248	AEBP2	1
GO:0043066	negative regulation of apoptotic process	5/263	481/16374	0.889111	0.920701	0.75677	ARNT2/CAMK1D/CHST11/ASIC2/PTK2B	5
GO:0043161	proteasome-mediated ubiquitin-dependent protein catabolic process	2/263	232/16374	0.889884	0.920974	0.756995	TRIM9/NEDD4L	2
GO:0048015	phosphatidylinositol-mediated signaling	1/263	137/16374	0.892224	0.922868	0.758551	KCNH1	1
GO:0033554	cellular response to stress	2/263	237/16374	0.896808	0.926707	0.761707	CAMK2B/CAMK2A	2
GO:0006511	ubiquitin-dependent protein catabolic process	3/263	325/16374	0.896962	0.926707	0.761707	NEDD4L/TTC3/PTK2B	3
GO:0001503	ossification	2/263	238/16374	0.898143	0.927397	0.762274	BMPR2/ACVR1	2
GO:0042060	wound healing	3/263	328/16374	0.900416	0.929213	0.763767	PRKCE/ZFPM2/PRKAR1B	3
GO:0042098	T cell proliferation	1/263	144/16374	0.903868	0.932243	0.766257	NCK2	1
GO:0007005	mitochondrion organization	1/263	146/16374	0.906959	0.934897	0.768438	VPS13D	1
GO:0061919	process utilizing autophagic mechanism	1/263	147/16374	0.908467	0.935917	0.769277	ADRA1A	1
GO:0006909	phagocytosis	1/263	150/16374	0.912846	0.939358	0.772105	CAMK1D	1
GO:0032446	protein modification by small protein conjugation	1/263	150/16374	0.912846	0.939358	0.772105	PRKCE	1
GO:0071222	cellular response to lipopolysaccharide	1/263	151/16374	0.914259	0.940276	0.77286	PRKCE	1
GO:0032869	cellular response to insulin stimulus	1/263	152/16374	0.915649	0.940635	0.773155	HDAC9	1
GO:0044248	cellular catabolic process	1/263	152/16374	0.915649	0.940635	0.773155	ADRA1A	1
GO:0002250	adaptive immune response	1/263	153/16374	0.917016	0.94097	0.77343	PTK2B	1
GO:0097193	intrinsic apoptotic signaling pathway	1/263	153/16374	0.917016	0.94097	0.77343	NCK2	1
GO:0032496	response to lipopolysaccharide	1/263	154/16374	0.918362	0.941816	0.774125	PRKCE	1
GO:0046651	lymphocyte proliferation	1/263	157/16374	0.922269	0.945287	0.776978	NCK2	1
GO:0030855	epithelial cell differentiation	1/263	158/16374	0.92353	0.945506	0.777158	FNDC3A	1
GO:0042981	regulation of apoptotic process	1/263	158/16374	0.92353	0.945506	0.777158	PPP1R13B	1
GO:0051897	positive regulation of protein kinase B signaling	1/263	160/16374	0.92599	0.947488	0.778788	SEMA5A	1
GO:0050663	cytokine secretion	1/263	162/16374	0.928372	0.94914	0.780145	HDAC9	1
GO:0006952	defense response	2/263	265/16374	0.928655	0.94914	0.780145	INHBA/LRFN5	2
GO:0000278	mitotic cell cycle	1/263	166/16374	0.932908	0.952948	0.783275	CDH13	1
GO:0044839	cell cycle G2/M phase transition	1/263	168/16374	0.935068	0.954612	0.784643	MTA3	1
GO:0007219	Notch signaling pathway	1/263	169/16374	0.936122	0.954612	0.784643	CNTN1	1
GO:0043123	positive regulation of I-kappaB kinase/NF-kappaB signaling	1/263	169/16374	0.936122	0.954612	0.784643	PRKCE	1
GO:0007049	cell cycle	4/263	458/16374	0.939061	0.956652	0.78632	ADARB1/INHBA/PRKCE/PPP1R13B	4
GO:0050852	T cell receptor signaling pathway	1/263	172/16374	0.939182	0.956652	0.78632	PAK3	1
GO:0019058	viral life cycle	1/263	173/16374	0.940169	0.957119	0.786703	NEDD4L	1
GO:0048514	blood vessel morphogenesis	2/263	279/16374	0.940863	0.957286	0.786841	COL4A2/ZFPM2	2
GO:0198738	cell-cell signaling by wnt	1/263	179/16374	0.945766	0.961733	0.790496	SHISA6	1
GO:0016310	phosphorylation	3/263	382/16374	0.947111	0.962558	0.791175	INHBA/DSCAM/GRM5	3
GO:0035239	tube morphogenesis	2/263	301/16374	0.956133	0.971182	0.798263	COL4A2/ZFPM2	2
GO:0044782	cilium organization	1/263	194/16374	0.957581	0.972106	0.799022	ADAMTS16	1
GO:0055114	oxidation-reduction process	4/263	492/16374	0.958141	0.972128	0.79904	ALDH1A2/MICAL2/DHFR/KCNAB2	4
GO:0006954	inflammatory response	4/263	497/16374	0.96043	0.973904	0.8005	HRH1/LRFN5/CAMK1D/HDAC9	4
GO:0070925	organelle assembly	2/263	312/16374	0.962279	0.975207	0.801571	FHOD3/ADAMTS16	2
GO:0016236	macroautophagy	1/263	202/16374	0.962794	0.975207	0.801571	PRKAG2	1
GO:0006996	organelle organization	2/263	315/16374	0.963807	0.975686	0.801965	PDE4DIP/AEBP2	2
GO:0000086	G2/M transition of mitotic cell cycle	1/263	208/16374	0.96628	0.977592	0.803531	MTA3	1
GO:0071356	cellular response to tumor necrosis factor	1/263	209/16374	0.966829	0.977592	0.803531	PTK2B	1
GO:0051276	chromosome organization	1/263	210/16374	0.967369	0.977592	0.803531	AEBP2	1
GO:0009888	tissue development	1/263	211/16374	0.9679	0.977592	0.803531	RPS6KA6	1
GO:0050896	response to stimulus	1/263	212/16374	0.968422	0.977592	0.803531	RIMS1	1
GO:0010629	negative regulation of gene expression	1/263	213/16374	0.968936	0.977592	0.803531	SLIT3	1
GO:0022402	cell cycle process	1/263	223/16374	0.973638	0.981788	0.80698	NIN	1
GO:0043687	post-translational protein modification	2/263	346/16374	0.976487	0.984111	0.80889	LAMB1/KLHL5	2
GO:0043491	protein kinase B signaling	1/263	240/16374	0.980061	0.986972	0.811241	SEMA5A	1
GO:0006914	autophagy	2/263	359/16374	0.980417	0.986972	0.811241	PRKAG2/ADRA1A	2
GO:0007249	I-kappaB kinase/NF-kappaB signaling	1/263	245/16374	0.981634	0.987646	0.811795	PRKCE	1
GO:0001501	skeletal system development	1/263	250/16374	0.983083	0.988554	0.812542	TLL1	1
GO:0019221	cytokine-mediated signaling pathway	2/263	383/16374	0.986071	0.990727	0.814328	CCDC3/SLIT3	2
GO:1903047	mitotic cell cycle process	1/263	263/16374	0.986341	0.990727	0.814328	TMOD3	1
GO:0006355	regulation of transcription, DNA-templated	2/263	406/16374	0.989984	0.993834	0.816881	ARNT2/AFF3	2
GO:0071310	cellular response to organic substance	1/263	289/16374	0.991099	0.994138	0.817132	MAP2	1
GO:0060271	cilium assembly	1/263	292/16374	0.991529	0.994138	0.817132	ADAMTS16	1
GO:0034097	response to cytokine	1/263	295/16374	0.991938	0.994138	0.817132	ALDH1A2	1
GO:0045087	innate immune response	2/263	429/16374	0.992819	0.99447	0.817404	ADARB1/SUSD4	2
GO:0006464	cellular protein modification process	1/263	365/16374	0.997465	0.99857	0.820774	GRM5	1
GO:0051301	cell division	1/263	419/16374	0.998965	0.999079	0.821193	PRKCE	1
GO:0001816	cytokine production	1/263	426/16374	0.999079	0.999079	0.821193	LRRFIP1	1

## Sheet: Fig6F Cluster3 gene &GO terms
Genes and enriched GO terms of Cluster 3 from injury neurogenic lineage trajectory
ID	Description	GeneRatio	BgRatio	pvalue	p.adjust	qvalue	geneID	Count
GO:0042552	myelination	8/125	98/16374	8.15731e-07	0.00106616	0.000881848	BCAS1/NDRG1/NKX6-2/MAL/SERINC5/DLG1/FA2H/DICER1	8
GO:0097201	negative regulation of transcription from RNA polymerase II promoter in response to stress	3/125	4/16374	1.72774e-06	0.00112908	0.000933888	HSPA1A/DNAJB1/BAG3	3
GO:0007409	axonogenesis	11/125	288/16374	1.29365e-05	0.00563599	0.00466167	RAP1GAP/HSP90AA1/ROBO1/CNP/S100A6/METRN/GAB2/SEMA3B/GAB1/PICALM/UNC5C	11
GO:0006986	response to unfolded protein	6/125	74/16374	2.12661e-05	0.00694869	0.00574744	HSP90AA1/HSPA1A/DNAJB1/HSPB1/HSPA5/HSPD1	6
GO:0032292	peripheral nervous system axon ensheathment	3/125	9/16374	3.52808e-05	0.0092224	0.00762808	NDRG1/FA2H/DICER1	3
GO:0008366	axon ensheathment	5/125	54/16374	5.60921e-05	0.0122187	0.0101064	PLP1/NKX6-2/DLG1/DICER1/MBP	5
GO:0061643	chemorepulsion of axon	2/125	3/16374	0.00017258	0.0266238	0.0220212	SEMA3B/UNC5C	2
GO:0007566	embryo implantation	4/125	39/16374	0.00021649	0.0266238	0.0220212	SPP1/H3F3B/VMP1/CST3	4
GO:0051131	chaperone-mediated protein complex assembly	3/125	16/16374	0.000226182	0.0266238	0.0220212	HSP90AA1/HSPA1A/HSPD1	3
GO:0061684	chaperone-mediated autophagy	3/125	16/16374	0.000226182	0.0266238	0.0220212	HSP90AA1/LAMP2/BAG3	3
GO:0007417	central nervous system development	10/125	339/16374	0.000273691	0.0266238	0.0220212	BAG3/MAL/CNP/NIPBL/CHD7/CST3/SHROOM4/MOG/MBP/UNC5C	10
GO:1900034	regulation of cellular response to heat	5/125	77/16374	0.000304707	0.0266238	0.0220212	HSP90AA1/HSPA1A/DNAJB1/BAG3/CRYAB	5
GO:0050821	protein stabilization	7/125	169/16374	0.000316514	0.0266238	0.0220212	HSP90AA1/LAMP2/HSPA1A/BAG3/CRYAB/C10orf90/HSPD1	7
GO:0021762	substantia nigra development	4/125	43/16374	0.000317263	0.0266238	0.0220212	PLP1/CNP/HSPA5/MBP	4
GO:0006826	iron ion transport	3/125	18/16374	0.000325922	0.0266238	0.0220212	FTH1/FTL/TF	3
GO:0042026	protein refolding	3/125	18/16374	0.000325922	0.0266238	0.0220212	HSP90AA1/HSPA1A/HSPD1	3
GO:0007420	brain development	9/125	295/16374	0.000436415	0.0335526	0.0277522	DNAJB1/BAG3/CNP/NIPBL/CST3/HYDIN/SHROOM4/LRP2/UNC5C	9
GO:0048812	neuron projection morphogenesis	10/125	373/16374	0.000579927	0.0421092	0.0348296	RAP1GAP/HSP90AA1/ROBO1/METRN/GAB2/DNM3/SEMA3B/GAB1/DICER1/UNC5C	10
GO:0055072	iron ion homeostasis	3/125	24/16374	0.000781834	0.0537819	0.0444844	FTL/PICALM/TF	3
GO:0042634	regulation of hair cycle	2/125	6/16374	0.000850012	0.0555483	0.0459454	NIPBL/FA2H	2
GO:0022011	myelination in peripheral nervous system	3/125	26/16374	0.000993216	0.0618159	0.0511295	NDRG1/FA2H/DICER1	3
GO:0032287	peripheral nervous system myelin maintenance	2/125	7/16374	0.00118407	0.0703445	0.0581837	NDRG1/FA2H	2
GO:0001654	eye development	6/125	158/16374	0.00133963	0.0761257	0.0629655	CRYAB/NIPBL/CHD7/CST3/DLG1/ADAMTS18	6
GO:0030334	regulation of cell migration	4/125	64/16374	0.00144397	0.0786363	0.0650421	FRMD5/ENPP2/SGK1/UNC5C	4
GO:0038128	ERBB2 signaling pathway	3/125	31/16374	0.00167006	0.0839524	0.0694391	HSP90AA1/ERBIN/GAB1	3
GO:0070423	nucleotide-binding oligomerization domain containing signaling pathway	3/125	31/16374	0.00167006	0.0839524	0.0694391	UBC/HSPA1A/ERBIN	3
GO:0034605	cellular response to heat	5/125	116/16374	0.0019535	0.0939103	0.0776756	HSP90AA1/HSPA1A/DNAJB1/BAG3/CRYAB	5
GO:0000045	autophagosome assembly	4/125	70/16374	0.00201185	0.0939103	0.0776756	BAG3/VMP1/RAB7A/PIP4K2A	4
GO:0061024	membrane organization	6/125	173/16374	0.00212253	0.0955314	0.0790164	UBC/LRP2/FA2H/PICALM/MBP/TF	6
GO:0007411	axon guidance	6/125	175/16374	0.00224854	0.0955314	0.0790164	RAP1GAP/ROBO1/GAB2/SEMA3B/GAB1/UNC5C	6
GO:0009408	response to heat	5/125	120/16374	0.00226586	0.0955314	0.0790164	HSP90AA1/HSPA1A/DNAJB1/BAG3/CRYAB	5
GO:0090084	negative regulation of inclusion body assembly	2/125	10/16374	0.00249949	0.101869	0.0842585	HSPA1A/DNAJB1	2
GO:0032502	developmental process	3/125	38/16374	0.00301492	0.101869	0.0842585	CRYAB/NIPBL/PICALM	3
GO:0070918	production of small RNA involved in gene silencing by RNA	3/125	38/16374	0.00301492	0.101869	0.0842585	DDX5/HNRNPA2B1/DICER1	3
GO:0006900	vesicle budding from membrane	2/125	11/16374	0.00303971	0.101869	0.0842585	RAB7A/PICALM	2
GO:0050802	circadian sleep/wake cycle, sleep	2/125	11/16374	0.00303971	0.101869	0.0842585	PTGDS/CST3	2
GO:0060674	placenta blood vessel development	2/125	11/16374	0.00303971	0.101869	0.0842585	ITGB8/SOCS3	2
GO:0098911	regulation of ventricular cardiac muscle cell action potential	2/125	11/16374	0.00303971	0.101869	0.0842585	DLG1/CTNNA3	2
GO:1905146	lysosomal protein catabolic process	2/125	11/16374	0.00303971	0.101869	0.0842585	LAMP2/LRP2	2
GO:0006605	protein targeting	5/125	132/16374	0.00342113	0.107812	0.0891739	HSP90AA1/LAMP2/BAG3/RHOU/ERBIN	5
GO:0030901	midbrain development	4/125	81/16374	0.00342337	0.107812	0.0891739	PLP1/CNP/HSPA5/MBP	4
GO:0006839	mitochondrial transport	4/125	82/16374	0.00357799	0.107812	0.0891739	HSP90AA1/BAG3/RHOU/CNP	4
GO:0044706	multi-multicellular organism process	4/125	82/16374	0.00357799	0.107812	0.0891739	SPP1/H3F3B/VMP1/CST3	4
GO:0042303	molting cycle	2/125	12/16374	0.00362947	0.107812	0.0891739	NIPBL/FA2H	2
GO:0010038	response to metal ion	2/125	13/16374	0.00426802	0.119302	0.0986778	NDRG1/MT2A	2
GO:0070431	nucleotide-binding oligomerization domain containing 2 signaling pathway	2/125	13/16374	0.00426802	0.119302	0.0986778	HSPA1A/ERBIN	2
GO:0035196	production of miRNAs involved in gene silencing by miRNA	3/125	43/16374	0.00429013	0.119302	0.0986778	DDX5/HNRNPA2B1/DICER1	3
GO:0006644	phospholipid metabolic process	3/125	44/16374	0.00457866	0.122129	0.101016	PLA2G16/PIP4K2A/PLA2G4C	3
GO:0035904	aorta development	3/125	44/16374	0.00457866	0.122129	0.101016	ROBO1/CHD7/LRP2	3
GO:0050890	cognition	3/125	45/16374	0.00487866	0.126973	0.105023	NIPBL/CHD7/SHROOM4	3
GO:0021680	cerebellar Purkinje cell layer development	2/125	14/16374	0.00495458	0.126973	0.105023	RERE/HSPA5	2
GO:0040007	growth	4/125	92/16374	0.00539239	0.135017	0.111676	NIPBL/MT1E/SOCS3/MT2A	4
GO:0048870	cell motility	9/125	427/16374	0.00547505	0.135017	0.111676	ROBO1/FRMD5/SEPT7/ENPP2/HSPA5/SPAG9/SGK1/ELMO1/UNC5C	9
GO:0034620	cellular response to unfolded protein	3/125	48/16374	0.00584882	0.138415	0.114486	HSPA1A/BAG3/HSPA5	3
GO:0009653	anatomical structure morphogenesis	7/125	282/16374	0.00592539	0.138415	0.114486	ROBO1/CRYAB/SH3D19/NIPBL/LRP2/HSPA5/DICER1	7
GO:0019538	protein metabolic process	6/125	216/16374	0.00628517	0.138415	0.114486	CSNK2A1/CRYAB/TBC1D10A/RAB7A/CST3/CNDP1	6
GO:0031396	regulation of protein ubiquitination	2/125	16/16374	0.00646871	0.138415	0.114486	HSP90AA1/HSPA1A	2
GO:0036149	phosphatidylinositol acyl-chain remodeling	2/125	16/16374	0.00646871	0.138415	0.114486	PLA2G16/PLA2G4C	2
GO:0045047	protein targeting to ER	2/125	16/16374	0.00646871	0.138415	0.114486	SRP54/HSPA5	2
GO:0070841	inclusion body assembly	2/125	16/16374	0.00646871	0.138415	0.114486	HSPA1A/DNAJB1	2
GO:0060548	negative regulation of cell death	3/125	50/16374	0.00655519	0.138415	0.114486	HSPA1A/PDE8A/CST3	3
GO:0060322	head development	6/125	218/16374	0.00656596	0.138415	0.114486	BAG3/NIPBL/CHD7/CST3/SHROOM4/UNC5C	6
GO:0045926	negative regulation of growth	2/125	17/16374	0.00729478	0.151338	0.125175	MT1E/MT2A	2
GO:0006897	endocytosis	6/125	227/16374	0.00794345	0.16222	0.134176	RAB7A/LRP2/DNM3/PICALM/ELMO1/TF	6
GO:0006879	cellular iron ion homeostasis	3/125	55/16374	0.00853576	0.165823	0.137156	FTH1/FTL/TF	3
GO:0043488	regulation of mRNA stability	4/125	106/16374	0.00883813	0.165823	0.137156	UBC/HSPA1A/HSPB1/DCP1A	4
GO:0022010	central nervous system myelination	2/125	19/16374	0.00908131	0.165823	0.137156	NKX6-2/FA2H	2
GO:0031641	regulation of myelination	2/125	19/16374	0.00908131	0.165823	0.137156	NKX6-2/DLG1	2
GO:0044403	symbiotic process	2/125	19/16374	0.00908131	0.165823	0.137156	RAB7A/HSPD1	2
GO:0070102	interleukin-6-mediated signaling pathway	2/125	19/16374	0.00908131	0.165823	0.137156	SOCS3/ST18	2
GO:0071294	cellular response to zinc ion	2/125	19/16374	0.00908131	0.165823	0.137156	MT1E/MT2A	2
GO:0000904	cell morphogenesis involved in differentiation	5/125	167/16374	0.00913483	0.165823	0.137156	RERE/CNP/S100A6/DOCK5/PICALM	5
GO:0048667	cell morphogenesis involved in neuron differentiation	4/125	108/16374	0.00942455	0.168738	0.139568	RERE/CNP/S100A6/PICALM	4
GO:0033554	cellular response to stress	6/125	237/16374	0.009706	0.16951	0.140206	HSP90AA1/UBC/HSPA1A/DNAJB1/BAG3/CRYAB	6
GO:0048608	reproductive structure development	4/125	109/16374	0.00972703	0.16951	0.140206	ITGB8/NIPBL/SOCS3/DLG1	4
GO:0070741	response to interleukin-6	2/125	20/16374	0.0100403	0.172667	0.142817	SOCS3/ST18	2
GO:0034330	cell junction organization	3/125	60/16374	0.0108317	0.183857	0.152073	NDRG1/DNM3/CNTNAP4	3
GO:0050772	positive regulation of axonogenesis	2/125	21/16374	0.0110422	0.185028	0.153041	ROBO1/METRN	2
GO:0043066	negative regulation of apoptotic process	9/125	481/16374	0.0114798	0.189925	0.157092	UBC/HSPA1A/BAG3/CRYAB/HSPB1/SH3RF1/SOCS3/HSPA5/HSPD1	9
GO:0043312	neutrophil degranulation	9/125	484/16374	0.0119187	0.190325	0.157422	HSP90AA1/FTH1/FTL/LAMP2/HSPA1A/RAB7A/TMEM63A/CST3/AMPD3	9
GO:0046716	muscle cell cellular homeostasis	2/125	22/16374	0.0120863	0.190325	0.157422	LAMP2/BAG3	2
GO:0061077	chaperone-mediated protein folding	2/125	22/16374	0.0120863	0.190325	0.157422	CSNK2A1/HSPB1	2
GO:0042147	retrograde transport, endosome to Golgi	3/125	63/16374	0.0123643	0.190325	0.157422	TBC1D10A/RAB7A/SPAG9	3
GO:0006810	transport	4/125	117/16374	0.0123757	0.190325	0.157422	CRYAB/CNP/DNM3/PICALM	4
GO:0002446	neutrophil mediated immunity	9/125	488/16374	0.0125233	0.190325	0.157422	HSP90AA1/FTH1/FTL/LAMP2/HSPA1A/RAB7A/TMEM63A/CST3/AMPD3	9
GO:0007399	nervous system development	9/125	488/16374	0.0125233	0.190325	0.157422	RERE/ROBO1/MAL/CHD7/DNM3/MOG/MOBP/DICER1/MBP	9
GO:0072655	establishment of protein localization to mitochondrion	3/125	64/16374	0.0129013	0.191658	0.158525	HSP90AA1/BAG3/RHOU	3
GO:0051674	localization of cell	2/125	23/16374	0.0131718	0.191658	0.158525	ENPP2/ELMO1	2
GO:0043154	negative regulation of cysteine-type endopeptidase activity involved in apoptotic process	3/125	65/16374	0.0134516	0.191658	0.158525	CSNK2A1/CRYAB/SH3RF1	3
GO:0002444	myeloid leukocyte mediated immunity	9/125	494/16374	0.0134728	0.191658	0.158525	HSP90AA1/FTH1/FTL/LAMP2/HSPA1A/RAB7A/TMEM63A/CST3/AMPD3	9
GO:0010001	glial cell differentiation	4/125	121/16374	0.0138572	0.191658	0.158525	PLP1/NKX6-2/METRN/DICER1	4
GO:0030512	negative regulation of transforming growth factor beta receptor signaling pathway	3/125	66/16374	0.014015	0.191658	0.158525	UBC/HSPA1A/HSPA5	3
GO:0038084	vascular endothelial growth factor signaling pathway	2/125	24/16374	0.0142982	0.191658	0.158525	ROBO1/GAB1	2
GO:0062009	secondary palate development	2/125	24/16374	0.0142982	0.191658	0.158525	CHD7/DLG1	2
GO:0006457	protein folding	4/125	126/16374	0.0158616	0.191658	0.158525	CSNK2A1/BAG3/CRYAB/HSPA5	4
GO:0008654	phospholipid biosynthetic process	2/125	26/16374	0.0166706	0.191658	0.158525	PLA2G16/SERINC5	2
GO:0036152	phosphatidylethanolamine acyl-chain remodeling	2/125	26/16374	0.0166706	0.191658	0.158525	PLA2G16/PLA2G4C	2
GO:0042633	hair cycle	2/125	26/16374	0.0166706	0.191658	0.158525	NIPBL/FA2H	2
GO:0050769	positive regulation of neurogenesis	2/125	26/16374	0.0166706	0.191658	0.158525	MAN2A1/LRP2	2
GO:0003151	outflow tract morphogenesis	3/125	71/16374	0.017032	0.191658	0.158525	ROBO1/NIPBL/LRP2	3
GO:0003148	outflow tract septum morphogenesis	2/125	27/16374	0.0179154	0.191658	0.158525	ROBO1/LRP2	2
GO:0036151	phosphatidylcholine acyl-chain remodeling	2/125	27/16374	0.0179154	0.191658	0.158525	PLA2G16/PLA2G4C	2
GO:0097485	neuron projection guidance	2/125	28/16374	0.0191983	0.191658	0.158525	SEMA3B/UNC5C	2
GO:0051403	stress-activated MAPK cascade	5/125	202/16374	0.0193994	0.191658	0.158525	UBC/GADD45B/CRYAB/SH3RF1/DLG1	5
GO:0006469	negative regulation of protein kinase activity	3/125	75/16374	0.0196867	0.191658	0.158525	GADD45B/HSPB1/SOCS3	3
GO:0044703	multi-organism reproductive process	4/125	136/16374	0.0203955	0.191658	0.158525	SPP1/H3F3B/VMP1/CST3	4
GO:0071480	cellular response to gamma radiation	2/125	29/16374	0.0205187	0.191658	0.158525	CRYAB/HSPA5	2
GO:0007178	transmembrane receptor protein serine/threonine kinase signaling pathway	5/125	207/16374	0.0213062	0.191658	0.158525	UBC/HSPA1A/LRP2/HSPA5/PCSK6	5
GO:0007605	sensory perception of sound	4/125	138/16374	0.0213884	0.191658	0.158525	NIPBL/CHD7/LRP2/MBP	4
GO:0000956	nuclear-transcribed mRNA catabolic process	3/125	78/16374	0.0218192	0.191658	0.158525	DDX5/NBDY/DCP1A	3
GO:0001766	membrane raft polarization	1/125	3/16374	0.0227291	0.191658	0.158525	MAL	1
GO:0002424	T cell mediated immune response to tumor cell	1/125	3/16374	0.0227291	0.191658	0.158525	HSPD1	1
GO:0006210	thymine catabolic process	1/125	3/16374	0.0227291	0.191658	0.158525	DPYD	1
GO:0006458	'de novo' protein folding	1/125	3/16374	0.0227291	0.191658	0.158525	HSPD1	1
GO:0006679	glucosylceramide biosynthetic process	1/125	3/16374	0.0227291	0.191658	0.158525	FA2H	1
GO:0010664	negative regulation of striated muscle cell apoptotic process	1/125	3/16374	0.0227291	0.191658	0.158525	BAG3	1
GO:0016476	regulation of embryonic cell shape	1/125	3/16374	0.0227291	0.191658	0.158525	SEPT7	1
GO:0021553	olfactory nerve development	1/125	3/16374	0.0227291	0.191658	0.158525	CHD7	1
GO:0021912	regulation of transcription from RNA polymerase II promoter involved in spinal cord motor neuron fate specification	1/125	3/16374	0.0227291	0.191658	0.158525	NKX6-2	1
GO:0031509	subtelomeric heterochromatin assembly	1/125	3/16374	0.0227291	0.191658	0.158525	H3F3B	1
GO:0032225	regulation of synaptic transmission, dopaminergic	1/125	3/16374	0.0227291	0.191658	0.158525	CNTNAP4	1
GO:0032273	positive regulation of protein polymerization	1/125	3/16374	0.0227291	0.191658	0.158525	HSP90AA1	1
GO:0032383	regulation of intracellular cholesterol transport	1/125	3/16374	0.0227291	0.191658	0.158525	ABCA2	1
GO:0034625	fatty acid elongation, monounsaturated fatty acid	1/125	3/16374	0.0227291	0.191658	0.158525	ELOVL5	1
GO:0034756	regulation of iron ion transport	1/125	3/16374	0.0227291	0.191658	0.158525	TF	1
GO:0035633	maintenance of blood-brain barrier	1/125	3/16374	0.0227291	0.191658	0.158525	MBP	1
GO:0035728	response to hepatocyte growth factor	1/125	3/16374	0.0227291	0.191658	0.158525	GAB1	1
GO:0035938	estradiol secretion	1/125	3/16374	0.0227291	0.191658	0.158525	SPP1	1
GO:0043067	regulation of programmed cell death	1/125	3/16374	0.0227291	0.191658	0.158525	CST3	1
GO:0045069	regulation of viral genome replication	1/125	3/16374	0.0227291	0.191658	0.158525	DDX5	1
GO:0045686	negative regulation of glial cell differentiation	1/125	3/16374	0.0227291	0.191658	0.158525	NKX6-2	1
GO:0046485	ether lipid metabolic process	1/125	3/16374	0.0227291	0.191658	0.158525	PLA2G16	1
GO:0048524	positive regulation of viral process	1/125	3/16374	0.0227291	0.191658	0.158525	RAB7A	1
GO:0050819	negative regulation of coagulation	1/125	3/16374	0.0227291	0.191658	0.158525	HS3ST5	1
GO:0051684	maintenance of Golgi location	1/125	3/16374	0.0227291	0.191658	0.158525	ARHGAP21	1
GO:0060309	elastin catabolic process	1/125	3/16374	0.0227291	0.191658	0.158525	CST3	1
GO:0060313	negative regulation of blood vessel remodeling	1/125	3/16374	0.0227291	0.191658	0.158525	CST3	1
GO:0060453	regulation of gastric acid secretion	1/125	3/16374	0.0227291	0.191658	0.158525	SGK1	1
GO:0061740	protein targeting to lysosome involved in chaperone-mediated autophagy	1/125	3/16374	0.0227291	0.191658	0.158525	LAMP2	1
GO:0070370	cellular heat acclimation	1/125	3/16374	0.0227291	0.191658	0.158525	HSPA1A	1
GO:0070433	negative regulation of nucleotide-binding oligomerization domain containing 2 signaling pathway	1/125	3/16374	0.0227291	0.191658	0.158525	ERBIN	1
GO:0070434	positive regulation of nucleotide-binding oligomerization domain containing 2 signaling pathway	1/125	3/16374	0.0227291	0.191658	0.158525	HSPA1A	1
GO:0070447	positive regulation of oligodendrocyte progenitor proliferation	1/125	3/16374	0.0227291	0.191658	0.158525	LRP2	1
GO:0090230	regulation of centromere complex assembly	1/125	3/16374	0.0227291	0.191658	0.158525	H3F3B	1
GO:0098840	protein transport along microtubule	1/125	3/16374	0.0227291	0.191658	0.158525	BAG3	1
GO:1903542	negative regulation of exosomal secretion	1/125	3/16374	0.0227291	0.191658	0.158525	RAB7A	1
GO:1903894	regulation of IRE1-mediated unfolded protein response	1/125	3/16374	0.0227291	0.191658	0.158525	HSPA5	1
GO:1903895	negative regulation of IRE1-mediated unfolded protein response	1/125	3/16374	0.0227291	0.191658	0.158525	HSPA5	1
GO:1904219	positive regulation of CDP-diacylglycerol-serine O-phosphatidyltransferase activity	1/125	3/16374	0.0227291	0.191658	0.158525	SERINC5	1
GO:1904222	positive regulation of serine C-palmitoyltransferase activity	1/125	3/16374	0.0227291	0.191658	0.158525	SERINC5	1
GO:1904694	negative regulation of vascular smooth muscle contraction	1/125	3/16374	0.0227291	0.191658	0.158525	DOCK5	1
GO:1905167	positive regulation of lysosomal protein catabolic process	1/125	3/16374	0.0227291	0.191658	0.158525	LRP2	1
GO:1905224	clathrin-coated pit assembly	1/125	3/16374	0.0227291	0.191658	0.158525	PICALM	1
GO:1905337	positive regulation of aggrephagy	1/125	3/16374	0.0227291	0.191658	0.158525	BAG3	1
GO:2000564	regulation of CD8-positive, alpha-beta T cell proliferation	1/125	3/16374	0.0227291	0.191658	0.158525	SH3RF1	1
GO:0009409	response to cold	2/125	31/16374	0.0232695	0.191788	0.158633	HSP90AA1/HSPD1	2
GO:0016601	Rac protein signal transduction	2/125	31/16374	0.0232695	0.191788	0.158633	RHOU/ELMO1	2
GO:0021675	nerve development	2/125	31/16374	0.0232695	0.191788	0.158633	CHD7/DICER1	2
GO:0003006	developmental process involved in reproduction	5/125	212/16374	0.0233315	0.191788	0.158633	SPP1/H3F3B/CHD7/SOCS3/CST3	5
GO:0031175	neuron projection development	8/125	456/16374	0.0236775	0.193415	0.159979	RERE/CLMN/CNP/S100A6/DNM3/HSPA5/DICER1/PICALM	8
GO:0040018	positive regulation of multicellular organism growth	2/125	32/16374	0.0246986	0.19343	0.159991	NIPBL/CHD7	2
GO:0071354	cellular response to interleukin-6	2/125	32/16374	0.0246986	0.19343	0.159991	SOCS3/ST18	2
GO:0086005	ventricular cardiac muscle cell action potential	2/125	32/16374	0.0246986	0.19343	0.159991	DLG1/CTNNA3	2
GO:0006626	protein targeting to mitochondrion	3/125	83/16374	0.0256432	0.19343	0.159991	HSP90AA1/BAG3/RHOU	3
GO:0045815	positive regulation of gene expression, epigenetic	2/125	33/16374	0.0261627	0.19343	0.159991	DDX21/POLR2F	2
GO:0019221	cytokine-mediated signaling pathway	7/125	383/16374	0.0276017	0.19343	0.159991	HSP90AA1/UBC/HSPA1A/ROBO1/RHOU/GAB2/SOCS3	7
GO:0035924	cellular response to vascular endothelial growth factor stimulus	2/125	34/16374	0.0276612	0.19343	0.159991	HSPB1/GAB1	2
GO:0000041	transition metal ion transport	1/125	4/16374	0.0301911	0.19343	0.159991	TF	1
GO:0003137	Notch signaling pathway involved in heart induction	1/125	4/16374	0.0301911	0.19343	0.159991	ROBO1	1
GO:0006477	protein sulfation	1/125	4/16374	0.0301911	0.19343	0.159991	HS3ST5	1
GO:0010454	negative regulation of cell fate commitment	1/125	4/16374	0.0301911	0.19343	0.159991	NKX6-2	1
GO:0010716	negative regulation of extracellular matrix disassembly	1/125	4/16374	0.0301911	0.19343	0.159991	CST3	1
GO:0010941	regulation of cell death	1/125	4/16374	0.0301911	0.19343	0.159991	CRYAB	1
GO:0015798	myo-inositol transport	1/125	4/16374	0.0301911	0.19343	0.159991	SLC5A11	1
GO:0016199	axon midline choice point recognition	1/125	4/16374	0.0301911	0.19343	0.159991	ROBO1	1
GO:0019262	N-acetylneuraminate catabolic process	1/125	4/16374	0.0301911	0.19343	0.159991	NPL	1
GO:0021913	regulation of transcription from RNA polymerase II promoter involved in ventral spinal cord interneuron specification	1/125	4/16374	0.0301911	0.19343	0.159991	NKX6-2	1
GO:0022615	protein to membrane docking	1/125	4/16374	0.0301911	0.19343	0.159991	RAB7A	1
GO:0030423	targeting of mRNA for destruction involved in RNA interference	1/125	4/16374	0.0301911	0.19343	0.159991	DICER1	1
GO:0031204	posttranslational protein targeting to membrane, translocation	1/125	4/16374	0.0301911	0.19343	0.159991	HSPA5	1
GO:0031508	pericentric heterochromatin assembly	1/125	4/16374	0.0301911	0.19343	0.159991	H3F3B	1
GO:0032264	IMP salvage	1/125	4/16374	0.0301911	0.19343	0.159991	AMPD3	1
GO:0032286	central nervous system myelin maintenance	1/125	4/16374	0.0301911	0.19343	0.159991	FA2H	1
GO:0032387	negative regulation of intracellular transport	1/125	4/16374	0.0301911	0.19343	0.159991	CRYAB	1
GO:0032455	nerve growth factor processing	1/125	4/16374	0.0301911	0.19343	0.159991	PCSK6	1
GO:0033600	negative regulation of mammary gland epithelial cell proliferation	1/125	4/16374	0.0301911	0.19343	0.159991	ROBO1	1
GO:0034626	fatty acid elongation, polyunsaturated fatty acid	1/125	4/16374	0.0301911	0.19343	0.159991	ELOVL5	1
GO:0035087	siRNA loading onto RISC involved in RNA interference	1/125	4/16374	0.0301911	0.19343	0.159991	DICER1	1
GO:0035481	positive regulation of Notch signaling pathway involved in heart induction	1/125	4/16374	0.0301911	0.19343	0.159991	ROBO1	1
GO:0035751	regulation of lysosomal lumen pH	1/125	4/16374	0.0301911	0.19343	0.159991	TMEM165	1
GO:0043622	cortical microtubule organization	1/125	4/16374	0.0301911	0.19343	0.159991	DLG1	1
GO:0045687	positive regulation of glial cell differentiation	1/125	4/16374	0.0301911	0.19343	0.159991	NKX6-2	1
GO:0046596	regulation of viral entry into host cell	1/125	4/16374	0.0301911	0.19343	0.159991	HS3ST5	1
GO:0050974	detection of mechanical stimulus involved in sensory perception	1/125	4/16374	0.0301911	0.19343	0.159991	PIEZO2	1
GO:0051541	elastin metabolic process	1/125	4/16374	0.0301911	0.19343	0.159991	CST3	1
GO:0060708	spongiotrophoblast differentiation	1/125	4/16374	0.0301911	0.19343	0.159991	SOCS3	1
GO:0070294	renal sodium ion absorption	1/125	4/16374	0.0301911	0.19343	0.159991	SGK1	1
GO:0070676	intralumenal vesicle formation	1/125	4/16374	0.0301911	0.19343	0.159991	RAB7A	1
GO:0090063	positive regulation of microtubule nucleation	1/125	4/16374	0.0301911	0.19343	0.159991	HSPA1A	1
GO:0090074	negative regulation of protein homodimerization activity	1/125	4/16374	0.0301911	0.19343	0.159991	HSPA5	1
GO:0097494	regulation of vesicle size	1/125	4/16374	0.0301911	0.19343	0.159991	PICALM	1
GO:0099562	maintenance of postsynaptic density structure	1/125	4/16374	0.0301911	0.19343	0.159991	DLG1	1
GO:1904209	positive regulation of chemokine (C-C motif) ligand 2 secretion	1/125	4/16374	0.0301911	0.19343	0.159991	MBP	1
GO:1905323	telomerase holoenzyme complex assembly	1/125	4/16374	0.0301911	0.19343	0.159991	HSP90AA1	1
GO:0007565	female pregnancy	4/125	154/16374	0.0303978	0.193804	0.1603	SPP1/H3F3B/VMP1/CST3	4
GO:0010634	positive regulation of epithelial cell migration	2/125	36/16374	0.030759	0.194213	0.160638	DOCK5/ENPP2	2
GO:0150063	visual system development	2/125	36/16374	0.030759	0.194213	0.160638	CST3/ADAMTS18	2
GO:0022008	neurogenesis	6/125	309/16374	0.0312468	0.196344	0.162401	METRN/CHD7/MAN2A1/SH3RF1/LRP2/HSPA5	6
GO:0002755	MyD88-dependent toll-like receptor signaling pathway	2/125	37/16374	0.0323571	0.201385	0.16657	UBC/HSPD1	2
GO:0006656	phosphatidylcholine biosynthetic process	2/125	37/16374	0.0323571	0.201385	0.16657	CSNK2A1/SLC44A1	2
GO:0048880	sensory system development	2/125	38/16374	0.0339872	0.207336	0.171493	CST3/ADAMTS18	2
GO:0099173	postsynapse organization	2/125	38/16374	0.0339872	0.207336	0.171493	NDRG1/DNM3	2
GO:0007229	integrin-mediated signaling pathway	3/125	94/16374	0.0352383	0.207336	0.171493	PLP1/FUT8/ERBIN	3
GO:0001974	blood vessel remodeling	2/125	40/16374	0.0373413	0.207336	0.171493	CHD7/CST3	2
GO:0002175	protein localization to paranode region of axon	1/125	5/16374	0.0375964	0.207336	0.171493	MAL	1
GO:0006616	SRP-dependent cotranslational protein targeting to membrane, translocation	1/125	5/16374	0.0375964	0.207336	0.171493	SRP54	1
GO:0006658	phosphatidylserine metabolic process	1/125	5/16374	0.0375964	0.207336	0.171493	SERINC5	1
GO:0006710	androgen catabolic process	1/125	5/16374	0.0375964	0.207336	0.171493	SPP1	1
GO:0007021	tubulin complex assembly	1/125	5/16374	0.0375964	0.207336	0.171493	CRYAB	1
GO:0010626	negative regulation of Schwann cell proliferation	1/125	5/16374	0.0375964	0.207336	0.171493	DICER1	1
GO:0021942	radial glia guided migration of Purkinje cell	1/125	5/16374	0.0375964	0.207336	0.171493	RERE	1
GO:0031579	membrane raft organization	1/125	5/16374	0.0375964	0.207336	0.171493	DLG1	1
GO:0032268	regulation of cellular protein metabolic process	1/125	5/16374	0.0375964	0.207336	0.171493	CNDP1	1
GO:0033564	anterior/posterior axon guidance	1/125	5/16374	0.0375964	0.207336	0.171493	UNC5C	1
GO:0034103	regulation of tissue remodeling	1/125	5/16374	0.0375964	0.207336	0.171493	CST3	1
GO:0038033	positive regulation of endothelial cell chemotaxis by VEGF-activated vascular endothelial growth factor receptor signaling pathway	1/125	5/16374	0.0375964	0.207336	0.171493	HSPB1	1
GO:0045040	protein insertion into mitochondrial outer membrane	1/125	5/16374	0.0375964	0.207336	0.171493	HSP90AA1	1
GO:0045187	regulation of circadian sleep/wake cycle, sleep	1/125	5/16374	0.0375964	0.207336	0.171493	PTGDS	1
GO:0051702	interaction with symbiont	1/125	5/16374	0.0375964	0.207336	0.171493	HSPD1	1
GO:1900407	regulation of cellular response to oxidative stress	1/125	5/16374	0.0375964	0.207336	0.171493	FUT8	1
GO:1901388	regulation of transforming growth factor beta activation	1/125	5/16374	0.0375964	0.207336	0.171493	ITGB8	1
GO:1903215	negative regulation of protein targeting to mitochondrion	1/125	5/16374	0.0375964	0.207336	0.171493	BAG3	1
GO:1904358	positive regulation of telomere maintenance via telomere lengthening	1/125	5/16374	0.0375964	0.207336	0.171493	HNRNPA2B1	1
GO:1904447	folate import across plasma membrane	1/125	5/16374	0.0375964	0.207336	0.171493	LRP2	1
GO:1905907	negative regulation of amyloid fibril formation	1/125	5/16374	0.0375964	0.207336	0.171493	CRYAB	1
GO:2000821	regulation of grooming behavior	1/125	5/16374	0.0375964	0.207336	0.171493	CNTNAP4	1
GO:2001014	regulation of skeletal muscle cell differentiation	1/125	5/16374	0.0375964	0.207336	0.171493	DDX5	1
GO:0007179	transforming growth factor beta receptor signaling pathway	4/125	166/16374	0.0384256	0.211018	0.174538	UBC/HSPA1A/FUT8/HSPA5	4
GO:0086002	cardiac muscle cell action potential involved in contraction	2/125	41/16374	0.0390641	0.212841	0.176046	DLG1/CTNNA3	2
GO:0006898	receptor-mediated endocytosis	4/125	168/16374	0.0398708	0.212841	0.176046	HSP90AA1/LRP2/PICALM/TF	4
GO:0061061	muscle structure development	2/125	42/16374	0.0408166	0.212841	0.176046	DDX5/H3F3B	2
GO:0030900	forebrain development	3/125	101/16374	0.0421793	0.212841	0.176046	DNAJB1/CNP/LRP2	3
GO:0019058	viral life cycle	4/125	173/16374	0.0436185	0.212841	0.176046	UBC/HSPA1A/RAB7A/MOG	4
GO:0002372	myeloid dendritic cell cytokine production	1/125	6/16374	0.0449457	0.212841	0.176046	DDX21	1
GO:0002735	positive regulation of myeloid dendritic cell cytokine production	1/125	6/16374	0.0449457	0.212841	0.176046	DDX21	1
GO:0006617	SRP-dependent cotranslational protein targeting to membrane, signal sequence recognition	1/125	6/16374	0.0449457	0.212841	0.176046	SRP54	1
GO:0006620	posttranslational protein targeting to endoplasmic reticulum membrane	1/125	6/16374	0.0449457	0.212841	0.176046	HSPA5	1
GO:0006682	galactosylceramide biosynthetic process	1/125	6/16374	0.0449457	0.212841	0.176046	FA2H	1
GO:0007354	zygotic determination of anterior/posterior axis, embryo	1/125	6/16374	0.0449457	0.212841	0.176046	PCSK6	1
GO:0009299	mRNA transcription	1/125	6/16374	0.0449457	0.212841	0.176046	DDX5	1
GO:0009597	detection of virus	1/125	6/16374	0.0449457	0.212841	0.176046	SERINC5	1
GO:0014010	Schwann cell proliferation	1/125	6/16374	0.0449457	0.212841	0.176046	DICER1	1
GO:0015871	choline transport	1/125	6/16374	0.0449457	0.212841	0.176046	SLC44A1	1
GO:0030510	regulation of BMP signaling pathway	1/125	6/16374	0.0449457	0.212841	0.176046	PCSK6	1
GO:0032411	positive regulation of transporter activity	1/125	6/16374	0.0449457	0.212841	0.176046	SGK1	1
GO:0033578	protein glycosylation in Golgi	1/125	6/16374	0.0449457	0.212841	0.176046	FUT8	1
GO:0035459	vesicle cargo loading	1/125	6/16374	0.0449457	0.212841	0.176046	PICALM	1
GO:0035740	CD8-positive, alpha-beta T cell proliferation	1/125	6/16374	0.0449457	0.212841	0.176046	SH3RF1	1
GO:0038203	TORC2 signaling	1/125	6/16374	0.0449457	0.212841	0.176046	SIK3	1
GO:0042426	choline catabolic process	1/125	6/16374	0.0449457	0.212841	0.176046	SLC44A1	1
GO:0048261	negative regulation of receptor-mediated endocytosis	1/125	6/16374	0.0449457	0.212841	0.176046	PICALM	1
GO:0048752	semicircular canal morphogenesis	1/125	6/16374	0.0449457	0.212841	0.176046	CHD7	1
GO:0060022	hard palate development	1/125	6/16374	0.0449457	0.212841	0.176046	DLG1	1
GO:0060872	semicircular canal development	1/125	6/16374	0.0449457	0.212841	0.176046	CHD7	1
GO:0061038	uterus morphogenesis	1/125	6/16374	0.0449457	0.212841	0.176046	NIPBL	1
GO:0061156	pulmonary artery morphogenesis	1/125	6/16374	0.0449457	0.212841	0.176046	LRP2	1
GO:0061724	lipophagy	1/125	6/16374	0.0449457	0.212841	0.176046	RAB7A	1
GO:0070292	N-acylphosphatidylethanolamine metabolic process	1/125	6/16374	0.0449457	0.212841	0.176046	PLA2G16	1
GO:0070842	aggresome assembly	1/125	6/16374	0.0449457	0.212841	0.176046	BAG3	1
GO:0071638	negative regulation of monocyte chemotactic protein-1 production	1/125	6/16374	0.0449457	0.212841	0.176046	ERBIN	1
GO:0071921	cohesin loading	1/125	6/16374	0.0449457	0.212841	0.176046	NIPBL	1
GO:0086073	bundle of His cell-Purkinje myocyte adhesion involved in cell communication	1/125	6/16374	0.0449457	0.212841	0.176046	CTNNA3	1
GO:0090385	phagosome-lysosome fusion	1/125	6/16374	0.0449457	0.212841	0.176046	RAB7A	1
GO:1900748	positive regulation of vascular endothelial growth factor signaling pathway	1/125	6/16374	0.0449457	0.212841	0.176046	ROBO1	1
GO:1902949	positive regulation of tau-protein kinase activity	1/125	6/16374	0.0449457	0.212841	0.176046	HSP90AA1	1
GO:1903753	negative regulation of p38MAPK cascade	1/125	6/16374	0.0449457	0.212841	0.176046	DLG1	1
GO:0038066	p38MAPK cascade	2/125	45/16374	0.0462475	0.213365	0.17648	GADD45B/DLG1	2
GO:0008219	cell death	5/125	256/16374	0.0465706	0.213365	0.17648	HSPA1A/CRYAB/PDE8A/CST3/PICALM	5
GO:0016049	cell growth	5/125	258/16374	0.0478669	0.213365	0.17648	CSNK2A1/HSPA1A/CRYAB/H3F3B/SGK1	5
GO:0060324	face development	2/125	46/16374	0.0481137	0.213365	0.17648	NIPBL/CHD7	2
GO:0007040	lysosome organization	2/125	47/16374	0.050007	0.213365	0.17648	RAB7A/TMEM165	2
GO:0007585	respiratory gaseous exchange by respiratory system	2/125	47/16374	0.050007	0.213365	0.17648	FUT8/MAN2A1	2
GO:0009617	response to bacterium	3/125	109/16374	0.0508868	0.213365	0.17648	PLA2G16/CHD7/MT2A	3
GO:0030330	DNA damage response, signal transduction by p53 class mediator	2/125	48/16374	0.051927	0.213365	0.17648	DDX5/NDRG1	2
GO:0048592	eye morphogenesis	2/125	48/16374	0.051927	0.213365	0.17648	NIPBL/MAN2A1	2
GO:0050790	regulation of catalytic activity	2/125	48/16374	0.051927	0.213365	0.17648	BAG3/SGK1	2
GO:0061564	axon development	3/125	110/16374	0.0520322	0.213365	0.17648	CNP/S100A6/PICALM	3
GO:0001554	luteolysis	1/125	7/16374	0.0522393	0.213365	0.17648	HSPA5	1
GO:0003223	ventricular compact myocardium morphogenesis	1/125	7/16374	0.0522393	0.213365	0.17648	LRP2	1
GO:0006564	L-serine biosynthetic process	1/125	7/16374	0.0522393	0.213365	0.17648	SERINC5	1
GO:0007033	vacuole organization	1/125	7/16374	0.0522393	0.213365	0.17648	MAN2A1	1
GO:0009056	catabolic process	1/125	7/16374	0.0522393	0.213365	0.17648	CST3	1
GO:0016188	synaptic vesicle maturation	1/125	7/16374	0.0522393	0.213365	0.17648	PICALM	1
GO:0030953	astral microtubule organization	1/125	7/16374	0.0522393	0.213365	0.17648	DLG1	1
GO:0032291	axon ensheathment in central nervous system	1/125	7/16374	0.0522393	0.213365	0.17648	FA2H	1
GO:0032366	intracellular sterol transport	1/125	7/16374	0.0522393	0.213365	0.17648	ABCA2	1
GO:0034975	protein folding in endoplasmic reticulum	1/125	7/16374	0.0522393	0.213365	0.17648	HSPA5	1
GO:0035280	miRNA loading onto RISC involved in gene silencing by miRNA	1/125	7/16374	0.0522393	0.213365	0.17648	DICER1	1
GO:0035385	Roundabout signaling pathway	1/125	7/16374	0.0522393	0.213365	0.17648	ROBO1	1
GO:0035926	chemokine (C-C motif) ligand 2 secretion	1/125	7/16374	0.0522393	0.213365	0.17648	MBP	1
GO:0036016	cellular response to interleukin-3	1/125	7/16374	0.0522393	0.213365	0.17648	MT2A	1
GO:0036018	cellular response to erythropoietin	1/125	7/16374	0.0522393	0.213365	0.17648	MT2A	1
GO:0036302	atrioventricular canal development	1/125	7/16374	0.0522393	0.213365	0.17648	CHD7	1
GO:0042747	circadian sleep/wake cycle, REM sleep	1/125	7/16374	0.0522393	0.213365	0.17648	CST3	1
GO:0044806	G-quadruplex DNA unwinding	1/125	7/16374	0.0522393	0.213365	0.17648	HNRNPA2B1	1
GO:0046653	tetrahydrofolate metabolic process	1/125	7/16374	0.0522393	0.213365	0.17648	PIPOX	1
GO:0048733	sebaceous gland development	1/125	7/16374	0.0522393	0.213365	0.17648	FA2H	1
GO:0051660	establishment of centrosome localization	1/125	7/16374	0.0522393	0.213365	0.17648	DLG1	1
GO:0060573	cell fate specification involved in pattern specification	1/125	7/16374	0.0522393	0.213365	0.17648	NKX6-2	1
GO:0061002	negative regulation of dendritic spine morphogenesis	1/125	7/16374	0.0522393	0.213365	0.17648	DNM3	1
GO:0070100	negative regulation of chemokine-mediated signaling pathway	1/125	7/16374	0.0522393	0.213365	0.17648	ROBO1	1
GO:0070972	protein localization to endoplasmic reticulum	1/125	7/16374	0.0522393	0.213365	0.17648	HSPA5	1
GO:0086069	bundle of His cell to Purkinje myocyte communication	1/125	7/16374	0.0522393	0.213365	0.17648	CTNNA3	1
GO:0090647	modulation of age-related behavioral decline	1/125	7/16374	0.0522393	0.213365	0.17648	PICALM	1
GO:0150093	amyloid-beta clearance by transcytosis	1/125	7/16374	0.0522393	0.213365	0.17648	PICALM	1
GO:1902961	positive regulation of aspartic-type endopeptidase activity involved in amyloid precursor protein catabolic process	1/125	7/16374	0.0522393	0.213365	0.17648	PICALM	1
GO:1903608	protein localization to cytoplasmic stress granule	1/125	7/16374	0.0522393	0.213365	0.17648	DCP1A	1
GO:1990791	dorsal root ganglion development	1/125	7/16374	0.0522393	0.213365	0.17648	UNC5C	1
GO:2000394	positive regulation of lamellipodium morphogenesis	1/125	7/16374	0.0522393	0.213365	0.17648	ENPP2	1
GO:2001269	positive regulation of cysteine-type endopeptidase activity involved in apoptotic signaling pathway	1/125	7/16374	0.0522393	0.213365	0.17648	ST18	1
GO:0098609	cell-cell adhesion	4/125	187/16374	0.0551322	0.224479	0.185672	VMP1/DLG1/CTNNA3/MBP	4
GO:0002088	lens development in camera-type eye	2/125	51/16374	0.0578412	0.227302	0.188007	CRYAB/DLG1	2
GO:0046718	viral entry into host cell	3/125	116/16374	0.0591638	0.227302	0.188007	HSPA1A/HS3ST5/MOG	3
GO:0002495	antigen processing and presentation of peptide antigen via MHC class II	1/125	8/16374	0.0594777	0.227302	0.188007	2022-03-01	1
GO:0006491	N-glycan processing	1/125	8/16374	0.0594777	0.227302	0.188007	FUT8	1
GO:0021955	central nervous system neuron axonogenesis	1/125	8/16374	0.0594777	0.227302	0.188007	HSP90AA1	1
GO:0030422	production of siRNA involved in RNA interference	1/125	8/16374	0.0594777	0.227302	0.188007	DICER1	1
GO:0030540	female genitalia development	1/125	8/16374	0.0594777	0.227302	0.188007	CHD7	1
GO:0031053	primary miRNA processing	1/125	8/16374	0.0594777	0.227302	0.188007	HNRNPA2B1	1
GO:0032528	microvillus organization	1/125	8/16374	0.0594777	0.227302	0.188007	RAP1GAP	1
GO:0034638	phosphatidylcholine catabolic process	1/125	8/16374	0.0594777	0.227302	0.188007	ENPP2	1
GO:0036363	transforming growth factor beta activation	1/125	8/16374	0.0594777	0.227302	0.188007	ITGB8	1
GO:0042048	olfactory behavior	1/125	8/16374	0.0594777	0.227302	0.188007	CHD7	1
GO:0046710	GDP metabolic process	1/125	8/16374	0.0594777	0.227302	0.188007	DLG1	1
GO:0051304	chromosome separation	1/125	8/16374	0.0594777	0.227302	0.188007	CSNK2A1	1
GO:0051683	establishment of Golgi localization	1/125	8/16374	0.0594777	0.227302	0.188007	ARHGAP21	1
GO:0060438	trachea development	1/125	8/16374	0.0594777	0.227302	0.188007	HYDIN	1
GO:0060561	apoptotic process involved in morphogenesis	1/125	8/16374	0.0594777	0.227302	0.188007	CRYAB	1
GO:0070444	oligodendrocyte progenitor proliferation	1/125	8/16374	0.0594777	0.227302	0.188007	LRP2	1
GO:0099641	anterograde axonal protein transport	1/125	8/16374	0.0594777	0.227302	0.188007	HSPB1	1
GO:1902305	regulation of sodium ion transmembrane transport	1/125	8/16374	0.0594777	0.227302	0.188007	DLG1	1
GO:1902857	positive regulation of non-motile cilium assembly	1/125	8/16374	0.0594777	0.227302	0.188007	SEPT7	1
GO:0006814	sodium ion transport	3/125	117/16374	0.0603951	0.229466	0.189797	DLG1/SLC5A11/SGK1	3
GO:0035194	post-transcriptional gene silencing by RNA	3/125	117/16374	0.0603951	0.229466	0.189797	H3F3B/DICER1/POLR2F	3
GO:0030001	metal ion transport	2/125	53/16374	0.0619078	0.234532	0.193987	DLG1/LRP2	2
GO:0071363	cellular response to growth factor stimulus	5/125	280/16374	0.0635343	0.239998	0.198508	UBC/DDX5/FUT8/GAB1/POLR2F	5
GO:0003139	secondary heart field specification	1/125	9/16374	0.0666612	0.241347	0.199624	LRP2	1
GO:0032463	negative regulation of protein homooligomerization	1/125	9/16374	0.0666612	0.241347	0.199624	CRYAB	1
GO:0032731	positive regulation of interleukin-1 beta production	1/125	9/16374	0.0666612	0.241347	0.199624	HSPB1	1
GO:0034088	maintenance of mitotic sister chromatid cohesion	1/125	9/16374	0.0666612	0.241347	0.199624	NIPBL	1
GO:0035973	aggrephagy	1/125	9/16374	0.0666612	0.241347	0.199624	BAG3	1
GO:0042355	L-fucose catabolic process	1/125	9/16374	0.0666612	0.241347	0.199624	FUT8	1
GO:0043268	positive regulation of potassium ion transport	1/125	9/16374	0.0666612	0.241347	0.199624	DLG1	1
GO:0043306	positive regulation of mast cell degranulation	1/125	9/16374	0.0666612	0.241347	0.199624	GAB2	1
GO:0060982	coronary artery morphogenesis	1/125	9/16374	0.0666612	0.241347	0.199624	LRP2	1
GO:0070723	response to cholesterol	1/125	9/16374	0.0666612	0.241347	0.199624	ABCA2	1
GO:0071281	cellular response to iron ion	1/125	9/16374	0.0666612	0.241347	0.199624	TF	1
GO:0071394	cellular response to testosterone stimulus	1/125	9/16374	0.0666612	0.241347	0.199624	SPP1	1
GO:0072321	chaperone-mediated protein transport	1/125	9/16374	0.0666612	0.241347	0.199624	BAG3	1
GO:1901029	negative regulation of mitochondrial outer membrane permeabilization involved in apoptotic signaling pathway	1/125	9/16374	0.0666612	0.241347	0.199624	HSPA1A	1
GO:1903206	negative regulation of hydrogen peroxide-induced cell death	1/125	9/16374	0.0666612	0.241347	0.199624	PDE8A	1
GO:0016070	RNA metabolic process	2/125	56/16374	0.0681836	0.244162	0.201952	HNRNPA2B1/POLR2F	2
GO:0045732	positive regulation of protein catabolic process	2/125	57/16374	0.0703207	0.244162	0.201952	CSNK2A1/RAB7A	2
GO:0071310	cellular response to organic substance	5/125	289/16374	0.070687	0.244162	0.201952	HSP90AA1/UBC/RHOU/GAB2/SOCS3	5
GO:0010506	regulation of autophagy	2/125	58/16374	0.0724794	0.244162	0.201952	HSPB1/PIP4K2A	2
GO:0070527	platelet aggregation	2/125	58/16374	0.0724794	0.244162	0.201952	HSPB1/ADAMTS18	2
GO:0030509	BMP signaling pathway	3/125	127/16374	0.0733568	0.244162	0.201952	DDX5/LRP2/PCSK6	3
GO:0045766	positive regulation of angiogenesis	3/125	127/16374	0.0733568	0.244162	0.201952	HSPB1/ITGB8/GAB1	3
GO:0001845	phagolysosome assembly	1/125	10/16374	0.0737903	0.244162	0.201952	RAB7A	1
GO:0006198	cAMP catabolic process	1/125	10/16374	0.0737903	0.244162	0.201952	PDE8A	1
GO:0006878	cellular copper ion homeostasis	1/125	10/16374	0.0737903	0.244162	0.201952	MT2A	1
GO:0021587	cerebellum morphogenesis	1/125	10/16374	0.0737903	0.244162	0.201952	HSPA5	1
GO:0021930	cerebellar granule cell precursor proliferation	1/125	10/16374	0.0737903	0.244162	0.201952	RERE	1
GO:0030432	peristalsis	1/125	10/16374	0.0737903	0.244162	0.201952	DLG1	1
GO:0034115	negative regulation of heterotypic cell-cell adhesion	1/125	10/16374	0.0737903	0.244162	0.201952	MBP	1
GO:0034755	iron ion transmembrane transport	1/125	10/16374	0.0737903	0.244162	0.201952	TF	1
GO:0035136	forelimb morphogenesis	1/125	10/16374	0.0737903	0.244162	0.201952	NIPBL	1
GO:0035148	tube formation	1/125	10/16374	0.0737903	0.244162	0.201952	DICER1	1
GO:0036500	ATF6-mediated unfolded protein response	1/125	10/16374	0.0737903	0.244162	0.201952	HSPA5	1
GO:0042761	very long-chain fatty acid biosynthetic process	1/125	10/16374	0.0737903	0.244162	0.201952	ELOVL5	1
GO:0045197	establishment or maintenance of epithelial cell apical/basal polarity	1/125	10/16374	0.0737903	0.244162	0.201952	ERBIN	1
GO:0046037	GMP metabolic process	1/125	10/16374	0.0737903	0.244162	0.201952	DLG1	1
GO:0046660	female sex differentiation	1/125	10/16374	0.0737903	0.244162	0.201952	CHD7	1
GO:0048755	branching morphogenesis of a nerve	1/125	10/16374	0.0737903	0.244162	0.201952	RERE	1
GO:0051004	regulation of lipoprotein lipase activity	1/125	10/16374	0.0737903	0.244162	0.201952	PCSK6	1
GO:0060009	Sertoli cell development	1/125	10/16374	0.0737903	0.244162	0.201952	CST3	1
GO:0060068	vagina development	1/125	10/16374	0.0737903	0.244162	0.201952	LRP2	1
GO:0060765	regulation of androgen receptor signaling pathway	1/125	10/16374	0.0737903	0.244162	0.201952	DDX5	1
GO:0071287	cellular response to manganese ion	1/125	10/16374	0.0737903	0.244162	0.201952	HSPA5	1
GO:0071481	cellular response to X-ray	1/125	10/16374	0.0737903	0.244162	0.201952	NIPBL	1
GO:0072384	organelle transport along microtubule	1/125	10/16374	0.0737903	0.244162	0.201952	ARHGAP21	1
GO:0080171	lytic vacuole organization	1/125	10/16374	0.0737903	0.244162	0.201952	TMEM165	1
GO:1903265	positive regulation of tumor necrosis factor-mediated signaling pathway	1/125	10/16374	0.0737903	0.244162	0.201952	HSPA1A	1
GO:1903800	positive regulation of production of miRNAs involved in gene silencing by miRNA	1/125	10/16374	0.0737903	0.244162	0.201952	DDX5	1
GO:2001028	positive regulation of endothelial cell chemotaxis	1/125	10/16374	0.0737903	0.244162	0.201952	HSPB1	1
GO:0034097	response to cytokine	5/125	295/16374	0.0756932	0.248685	0.205693	HSP90AA1/UBC/RHOU/GAB2/SOCS3	5
GO:0097435	supramolecular fiber organization	3/125	129/16374	0.076087	0.248685	0.205693	CRYAB/LDB3/CST3	3
GO:0003279	cardiac septum development	2/125	60/16374	0.0768605	0.248685	0.205693	ROBO1/CHD7	2
GO:0035195	gene silencing by miRNA	3/125	130/16374	0.0774688	0.248685	0.205693	H3F3B/DICER1/POLR2F	3
GO:0097192	extrinsic apoptotic signaling pathway in absence of ligand	2/125	61/16374	0.0790819	0.248685	0.205693	HSPA1A/BAG3	2
GO:0010629	negative regulation of gene expression	4/125	213/16374	0.0804278	0.248685	0.205693	ROBO1/ITGB8/DICER1/PICALM	4
GO:0000185	activation of MAPKKK activity	1/125	11/16374	0.0808653	0.248685	0.205693	GADD45B	1
GO:0006983	ER overload response	1/125	11/16374	0.0808653	0.248685	0.205693	HSPA5	1
GO:0019371	cyclooxygenase pathway	1/125	11/16374	0.0808653	0.248685	0.205693	PTGDS	1
GO:0021521	ventral spinal cord interneuron specification	1/125	11/16374	0.0808653	0.248685	0.205693	NKX6-2	1
GO:0030261	chromosome condensation	1/125	11/16374	0.0808653	0.248685	0.205693	H3F3B	1
GO:0032495	response to muramyl dipeptide	1/125	11/16374	0.0808653	0.248685	0.205693	ERBIN	1
GO:0034629	cellular protein-containing complex localization	1/125	11/16374	0.0808653	0.248685	0.205693	DLG1	1
GO:0043517	positive regulation of DNA damage response, signal transduction by p53 class mediator	1/125	11/16374	0.0808653	0.248685	0.205693	DDX5	1
GO:0045176	apical protein localization	1/125	11/16374	0.0808653	0.248685	0.205693	MAL	1
GO:0045667	regulation of osteoblast differentiation	1/125	11/16374	0.0808653	0.248685	0.205693	DDX5	1
GO:0045723	positive regulation of fatty acid biosynthetic process	1/125	11/16374	0.0808653	0.248685	0.205693	ELOVL5	1
GO:0046135	pyrimidine nucleoside catabolic process	1/125	11/16374	0.0808653	0.248685	0.205693	DPYD	1
GO:0046902	regulation of mitochondrial membrane permeability	1/125	11/16374	0.0808653	0.248685	0.205693	CNP	1
GO:0050855	regulation of B cell receptor signaling pathway	1/125	11/16374	0.0808653	0.248685	0.205693	ELF2	1
GO:0051013	microtubule severing	1/125	11/16374	0.0808653	0.248685	0.205693	KATNA1	1
GO:0060712	spongiotrophoblast layer development	1/125	11/16374	0.0808653	0.248685	0.205693	SOCS3	1
GO:0071236	cellular response to antibiotic	1/125	11/16374	0.0808653	0.248685	0.205693	HSPA5	1
GO:0098659	inorganic cation import across plasma membrane	1/125	11/16374	0.0808653	0.248685	0.205693	DLG1	1
GO:1902004	positive regulation of amyloid-beta formation	1/125	11/16374	0.0808653	0.248685	0.205693	PICALM	1
GO:1902043	positive regulation of extrinsic apoptotic signaling pathway via death domain receptors	1/125	11/16374	0.0808653	0.248685	0.205693	MAL	1
GO:1902176	negative regulation of oxidative stress-induced intrinsic apoptotic signaling pathway	1/125	11/16374	0.0808653	0.248685	0.205693	HSPB1	1
GO:1904263	positive regulation of TORC1 signaling	1/125	11/16374	0.0808653	0.248685	0.205693	SIK3	1
GO:1990440	positive regulation of transcription from RNA polymerase II promoter in response to endoplasmic reticulum stress	1/125	11/16374	0.0808653	0.248685	0.205693	HSPA5	1
GO:2000786	positive regulation of autophagosome assembly	1/125	11/16374	0.0808653	0.248685	0.205693	PIP4K2A	1
GO:0006633	fatty acid biosynthetic process	2/125	62/16374	0.0813233	0.249506	0.206373	FA2H/ELOVL5	2
GO:0055085	transmembrane transport	6/125	396/16374	0.0830029	0.253809	0.209932	UBC/ABCA2/ABCA8/KCNH8/SLCO1A2/SLC44A1	6
GO:0017038	protein import	2/125	63/16374	0.0835842	0.253809	0.209932	LAMP2/BAG3	2
GO:0046034	ATP metabolic process	2/125	63/16374	0.0835842	0.253809	0.209932	HSPA1A/AMPD3	2
GO:0030163	protein catabolic process	4/125	217/16374	0.0847561	0.253809	0.209932	HSP90AA1/LAMP2/CSNK2A1/RAB7A	4
GO:0048545	response to steroid hormone	2/125	64/16374	0.0858643	0.253809	0.209932	SPP1/ABCA2	2
GO:0048015	phosphatidylinositol-mediated signaling	3/125	137/16374	0.0874465	0.253809	0.209932	PIP4K2A/GAB2/GAB1	3
GO:0006554	lysine catabolic process	1/125	12/16374	0.0878868	0.253809	0.209932	PIPOX	1
GO:0007039	protein catabolic process in the vacuole	1/125	12/16374	0.0878868	0.253809	0.209932	LRP2	1
GO:0009312	oligosaccharide biosynthetic process	1/125	12/16374	0.0878868	0.253809	0.209932	FUT8	1
GO:0009395	phospholipid catabolic process	1/125	12/16374	0.0878868	0.253809	0.209932	ENPP2	1
GO:0015711	organic anion transport	1/125	12/16374	0.0878868	0.253809	0.209932	SLCO1A2	1
GO:0021520	spinal cord motor neuron cell fate specification	1/125	12/16374	0.0878868	0.253809	0.209932	NKX6-2	1
GO:0031065	positive regulation of histone deacetylation	1/125	12/16374	0.0878868	0.253809	0.209932	NIPBL	1
GO:0032727	positive regulation of interferon-alpha production	1/125	12/16374	0.0878868	0.253809	0.209932	HSPD1	1
GO:0042359	vitamin D metabolic process	1/125	12/16374	0.0878868	0.253809	0.209932	LRP2	1
GO:0042532	negative regulation of tyrosine phosphorylation of STAT protein	1/125	12/16374	0.0878868	0.253809	0.209932	SOCS3	1
GO:0046475	glycerophospholipid catabolic process	1/125	12/16374	0.0878868	0.253809	0.209932	PLA2G4C	1
GO:0048745	smooth muscle tissue development	1/125	12/16374	0.0878868	0.253809	0.209932	DLG1	1
GO:0060670	branching involved in labyrinthine layer morphogenesis	1/125	12/16374	0.0878868	0.253809	0.209932	SOCS3	1
GO:0060707	trophoblast giant cell differentiation	1/125	12/16374	0.0878868	0.253809	0.209932	SOCS3	1
GO:0061458	reproductive system development	1/125	12/16374	0.0878868	0.253809	0.209932	DLG1	1
GO:0090331	negative regulation of platelet aggregation	1/125	12/16374	0.0878868	0.253809	0.209932	ADAMTS18	1
GO:0099645	neurotransmitter receptor localization to postsynaptic specialization membrane	1/125	12/16374	0.0878868	0.253809	0.209932	DLG1	1
GO:2000009	negative regulation of protein localization to cell surface	1/125	12/16374	0.0878868	0.253809	0.209932	PICALM	1
GO:2000146	negative regulation of cell motility	1/125	12/16374	0.0878868	0.253809	0.209932	FRMD5	1
GO:0007268	chemical synaptic transmission	5/125	309/16374	0.0881044	0.253809	0.209932	PLP1/CNP/MBP/CNTNAP4/PXK	5
GO:0003281	ventricular septum development	2/125	65/16374	0.0881631	0.253809	0.209932	ROBO1/LRP2	2
GO:0006625	protein targeting to peroxisome	2/125	65/16374	0.0881631	0.253809	0.209932	UBC/PIPOX	2
GO:0046330	positive regulation of JNK cascade	2/125	66/16374	0.0904802	0.258282	0.213632	GADD45B/SH3RF1	2
GO:0070925	organelle assembly	5/125	312/16374	0.0908951	0.258282	0.213632	HSP90AA1/NBDY/RAB7A/LDB3/PIP4K2A	5
GO:0043065	positive regulation of apoptotic process	5/125	315/16374	0.0937313	0.258282	0.213632	UBC/GADD45B/SEPT7/HSPD1/UNC5C	5
GO:0006516	glycoprotein catabolic process	1/125	13/16374	0.094855	0.258282	0.213632	CST3	1
GO:0006665	sphingolipid metabolic process	1/125	13/16374	0.094855	0.258282	0.213632	SERINC5	1
GO:0007064	mitotic sister chromatid cohesion	1/125	13/16374	0.094855	0.258282	0.213632	NIPBL	1
GO:0007431	salivary gland development	1/125	13/16374	0.094855	0.258282	0.213632	CST3	1
GO:0009743	response to carbohydrate	1/125	13/16374	0.094855	0.258282	0.213632	CST3	1
GO:0014829	vascular smooth muscle contraction	1/125	13/16374	0.094855	0.258282	0.213632	DOCK5	1
GO:0016246	RNA interference	1/125	13/16374	0.094855	0.258282	0.213632	DICER1	1
GO:0030201	heparan sulfate proteoglycan metabolic process	1/125	13/16374	0.094855	0.258282	0.213632	HS3ST5	1
GO:0031054	pre-miRNA processing	1/125	13/16374	0.094855	0.258282	0.213632	DICER1	1
GO:0033120	positive regulation of RNA splicing	1/125	13/16374	0.094855	0.258282	0.213632	HSPA1A	1
GO:0036109	alpha-linolenic acid metabolic process	1/125	13/16374	0.094855	0.258282	0.213632	ELOVL5	1
GO:0036474	cell death in response to hydrogen peroxide	1/125	13/16374	0.094855	0.258282	0.213632	PDE8A	1
GO:0038007	netrin-activated signaling pathway	1/125	13/16374	0.094855	0.258282	0.213632	UNC5C	1
GO:0043101	purine-containing compound salvage	1/125	13/16374	0.094855	0.258282	0.213632	AMPD3	1
GO:0043252	sodium-independent organic anion transport	1/125	13/16374	0.094855	0.258282	0.213632	SLCO1A2	1
GO:0045778	positive regulation of ossification	1/125	13/16374	0.094855	0.258282	0.213632	NIPBL	1
GO:0046426	negative regulation of receptor signaling pathway via JAK-STAT	1/125	13/16374	0.094855	0.258282	0.213632	SOCS3	1
GO:0048291	isotype switching to IgG isotypes	1/125	13/16374	0.094855	0.258282	0.213632	HSPD1	1
GO:0051085	chaperone cofactor-dependent protein refolding	1/125	13/16374	0.094855	0.258282	0.213632	DNAJB1	1
GO:0060334	regulation of interferon-gamma-mediated signaling pathway	1/125	13/16374	0.094855	0.258282	0.213632	SOCS3	1
GO:0140115	export across plasma membrane	1/125	13/16374	0.094855	0.258282	0.213632	DLG1	1
GO:1903364	positive regulation of cellular protein catabolic process	1/125	13/16374	0.094855	0.258282	0.213632	HSP90AA1	1
GO:2001224	positive regulation of neuron migration	1/125	13/16374	0.094855	0.258282	0.213632	NIPBL	1
GO:0051056	regulation of small GTPase mediated signal transduction	3/125	143/16374	0.0964084	0.261966	0.216679	RAP1GAP/RHOU/ARHGAP21	3
GO:0001895	retina homeostasis	2/125	69/16374	0.0975374	0.263937	0.218309	HSPB1/TF	2
GO:0051865	protein autoubiquitination	2/125	69/16374	0.0975374	0.263937	0.218309	SH3RF1/RNF220	2
GO:0001696	gastric acid secretion	1/125	14/16374	0.10177	0.269805	0.223163	SGK1	1
GO:0001771	immunological synapse formation	1/125	14/16374	0.10177	0.269805	0.223163	DLG1	1
GO:0014037	Schwann cell differentiation	1/125	14/16374	0.10177	0.269805	0.223163	DICER1	1
GO:0021545	cranial nerve development	1/125	14/16374	0.10177	0.269805	0.223163	CHD7	1
GO:0032228	regulation of synaptic transmission, GABAergic	1/125	14/16374	0.10177	0.269805	0.223163	CNTNAP4	1
GO:0046039	GTP metabolic process	1/125	14/16374	0.10177	0.269805	0.223163	AMPD3	1
GO:0071605	monocyte chemotactic protein-1 production	1/125	14/16374	0.10177	0.269805	0.223163	ERBIN	1
GO:0097202	activation of cysteine-type endopeptidase activity	1/125	14/16374	0.10177	0.269805	0.223163	TBC1D10A	1
GO:0097623	potassium ion export across plasma membrane	1/125	14/16374	0.10177	0.269805	0.223163	DLG1	1
GO:0140058	neuron projection arborization	1/125	14/16374	0.10177	0.269805	0.223163	LRP2	1
GO:0006919	activation of cysteine-type endopeptidase activity involved in apoptotic process	2/125	71/16374	0.102326	0.27073	0.223928	ROBO1/HSPD1	2
GO:0001890	placenta development	2/125	72/16374	0.104745	0.275697	0.228036	ITGB8/SOCS3	2
GO:0035264	multicellular organism growth	3/125	149/16374	0.105729	0.275697	0.228036	H3F3B/NIPBL/CHD7	3
GO:0006283	transcription-coupled nucleotide-excision repair	2/125	73/16374	0.107179	0.275697	0.228036	UBC/POLR2F	2
GO:0007015	actin filament organization	2/125	73/16374	0.107179	0.275697	0.228036	SHROOM4/DLG1	2
GO:0061008	hepaticobiliary system development	2/125	73/16374	0.107179	0.275697	0.228036	NIPBL/MAN2A1	2
GO:0061448	connective tissue development	2/125	73/16374	0.107179	0.275697	0.228036	PLA2G16/ITGB8	2
GO:0032446	protein modification by small protein conjugation	3/125	150/16374	0.107316	0.275697	0.228036	HSP90AA1/HSPA1A/HSPA5	3
GO:0007512	adult heart development	1/125	15/16374	0.108633	0.275697	0.228036	CHD7	1
GO:0010466	negative regulation of peptidase activity	1/125	15/16374	0.108633	0.275697	0.228036	CST3	1
GO:0042535	positive regulation of tumor necrosis factor biosynthetic process	1/125	15/16374	0.108633	0.275697	0.228036	HSPB1	1
GO:0043254	regulation of protein-containing complex assembly	1/125	15/16374	0.108633	0.275697	0.228036	HSP90AA1	1
GO:0043551	regulation of phosphatidylinositol 3-kinase activity	1/125	15/16374	0.108633	0.275697	0.228036	SOCS3	1
GO:0043584	nose development	1/125	15/16374	0.108633	0.275697	0.228036	CHD7	1
GO:0045104	intermediate filament cytoskeleton organization	1/125	15/16374	0.108633	0.275697	0.228036	ERBIN	1
GO:0048268	clathrin coat assembly	1/125	15/16374	0.108633	0.275697	0.228036	PICALM	1
GO:0050658	RNA transport	1/125	15/16374	0.108633	0.275697	0.228036	HNRNPA2B1	1
GO:0051044	positive regulation of membrane protein ectodomain proteolysis	1/125	15/16374	0.108633	0.275697	0.228036	SH3D19	1
GO:0090162	establishment of epithelial cell polarity	1/125	15/16374	0.108633	0.275697	0.228036	FRMD4B	1
GO:1903543	positive regulation of exosomal secretion	1/125	15/16374	0.108633	0.275697	0.228036	RAB7A	1
GO:1903827	regulation of cellular protein localization	1/125	15/16374	0.108633	0.275697	0.228036	HSP90AA1	1
GO:1990000	amyloid fibril formation	1/125	15/16374	0.108633	0.275697	0.228036	CRYAB	1
GO:0031647	regulation of protein stability	2/125	74/16374	0.109629	0.277683	0.229679	LAMP2/TF	2
GO:0042471	ear morphogenesis	2/125	76/16374	0.114571	0.28203	0.233274	NIPBL/CHD7	2
[truncated: 790 more rows]

## Sheet: Fig6F Cluster4 gene &GO terms
Genes and enriched GO terms of Cluster 4 from injury neurogenic lineage trajectory
[truncated: 2,282 more rows]

[truncated: 3 more sheets: Fig6H, FigS9A-GC, FigS9A-IN]
